# Supplementary material
Source: Elsevier journal article supplement (https://cris.unibo.it/retrieve/759efdcd-c359-4a9e-8389-9a33c5cbe09f/mmc2.pdf)

# THE LANCET

## Respiratory Medicine

### Supplementary appendix 2

This appendix formed part of the original submission and has been peer reviewed. We post it as supplied by the authors.

Supplement to: GBD 2019 Respiratory Tract Cancers Collaborators. Global, regional, and national burden of respiratory tract cancers and associated risk factors from 1990 to 2019: a systematic analysis for the Global Burden of Disease Study 2019. *Lancet Respir Med* 2021; published online August 16. [http://dx.doi.org/10.1016/S2213-2600\(21\)00164-8](http://dx.doi.org/10.1016/S2213-2600(21)00164-8).

## **Supplementary appendix 2**

### **Results appendix to “Global, regional, and national burden of respiratory tract cancers and associated risk factors from 1990 to 2019: a systematic analysis for the Global Burden of Disease Study 2019”**

This appendix provides more detailed results for “Global, regional, and national burden of respiratory tract cancers and associated risk factors from 1990 to 2019: a systematic analysis for the Global Burden of Disease Study 2019”.

## List of Appendix tables and figure

### Appendix tables

|                                                                                                                                                                                                                                                                                                                                                                                   |     |
|-----------------------------------------------------------------------------------------------------------------------------------------------------------------------------------------------------------------------------------------------------------------------------------------------------------------------------------------------------------------------------------|-----|
| Table S1. Incidence, deaths, and disability-adjusted life-years (DALYs) in 2019 (counts and age-standardised rates) and percent change in age-standardised rates between 2010 and 2019, at global, regional, national levels, and Socio-demographic Index (SDI) quintiles, by sex and for both sexes combined, for tracheal, bronchus, and lung (TBL) cancer.....                 | 3   |
| Table S2. Incidence, deaths, and disability-adjusted life-years (DALYs) in 2019 (counts and age-standardised rates) and percent change in age-standardised rates between 2010 and 2019, at global, regional, national levels, and Socio-demographic Index (SDI) quintiles, by sex and for both sexes combined, for larynx cancer.....                                             | 41  |
| Table S3. Years lived with disability (YLDs) and years of life lost (YLLs) in 2019 (counts and age-standardised rates), and percent change in age-standardised rates between 2010 and 2019, at global, regional, national levels, and Socio-demographic Index (SDI) quintiles, by sex and for both sexes combined, for tracheal, bronchus, and lung (TBL), and larynx cancer..... | 78  |
| Table S4. Tracheal, bronchus, and lung (TBL) cancer deaths (counts and age-standardised rates) attributable to specific risk factors in 2019, at global, regional, national levels, and Socio-demographic Index (SDI) quintiles, by sex and for both sexes combined. ....                                                                                                         | 137 |
| Table S5. Larynx cancer deaths (counts and age-standardised rates) attributable to specific risk factors in 2019, at global, regional, national levels, and Socio-demographic Index (SDI) quintiles, by sex and for both sexes combined. ....                                                                                                                                     | 204 |

### Appendix figure

|                                                                                                                                   |     |
|-----------------------------------------------------------------------------------------------------------------------------------|-----|
| Figure S1. Annualised rate of change in the age-standardised death rate of larynx cancer attributable to smoking, 2010–2019. .... | 238 |
|-----------------------------------------------------------------------------------------------------------------------------------|-----|

**Table S1. Incidence, deaths, and disability-adjusted life-years (DALYs) in 2019 (counts and age-standardised rates) and percent change in age-standardised rates between 2010 and 2019, at global, regional, national levels, and Socio-demographic Index (SDI) quintiles, by sex and for both sexes combined, for tracheal, bronchus, and lung (TBL) cancer.**

95% UIs given in parentheses.

| Location        | Sex    | Incidence                       |                                           |                                                               | Deaths                          |                                           |                                                               | DALYs                              |                                           |                                                               |
|-----------------|--------|---------------------------------|-------------------------------------------|---------------------------------------------------------------|---------------------------------|-------------------------------------------|---------------------------------------------------------------|------------------------------------|-------------------------------------------|---------------------------------------------------------------|
|                 |        | Number in 2019                  | Age-standardised rate per 100,000 in 2019 | Percent change in age-standardised rate from 2010 to 2019 (%) | Number in 2019                  | Age-standardised rate per 100,000 in 2019 | Percent change in age-standardised rate from 2010 to 2019 (%) | Number in 2019                     | Age-standardised rate per 100,000 in 2019 | Percent change in age-standardised rate from 2010 to 2019 (%) |
| Global          | Both   | 2260000<br>(2070000 to 2450000) | 27.7 (25.3 to 30)                         | -4.6 (-12.5 to 3.3)                                           | 2040000<br>(1880000 to 2190000) | 25.2 (23.2 to 27)                         | -5.7 (-12.6 to 1.5)                                           | 45900000<br>(42300000 to 49300000) | 551.6 (509 to 593.1)                      | -7.3 (-14.6 to 0.4)                                           |
|                 | Male   | 1520000<br>(1370000 to 1680000) | 40.4 (36.5 to 44.4)                       | -7.4 (-16.8 to 1.6)                                           | 1390000<br>(1260000 to 1510000) | 37.4 (34.1 to 40.7)                       | -8.7 (-16.8 to 0.2)                                           | 31600000<br>(28600000 to 34700000) | 802.9 (727.6 to 879.8)                    | -10 (-18.6 to -0.4)                                           |
|                 | Female | 737000<br>(658000 to 814000)    | 16.8 (15 to 18.6)                         | 0.9 (-8.2 to 10.2)                                            | 657000<br>(590000 to 719000)    | 15 (13.5 to 16.4)                         | 0.1 (-8.2 to 8.6)                                             | 14300000<br>(13000000 to 15700000) | 327.6 (298.5 to 360.4)                    | -1.3 (-10 to 7.7)                                             |
| High SDI        | Both   | 709000<br>(637000 to 773000)    | 37.4 (33.9 to 40.8)                       | -8.7 (-15.8 to -0.5)                                          | 578000<br>(534000 to 603000)    | 29.8 (27.8 to 31)                         | -8.9 (-11 to -6.9)                                            | 11300000<br>(10800000 to 11700000) | 636 (606.9 to 656.8)                      | -11 (-13.3 to -8.8)                                           |
|                 | Male   | 431000<br>(389000 to 478000)    | 49.7 (44.8 to 55)                         | -12.8 (-20.7 to -3.6)                                         | 354000<br>(333000 to 367000)    | 40.6 (38.3 to 42.1)                       | -13.1 (-15 to -11.1)                                          | 7030000<br>(6730000 to 7260000)    | 835.7 (801.8 to 863.2)                    | -14.8 (-16.8 to -12.6)                                        |
|                 | Female | 278000<br>(244000 to 310000)    | 27.3 (24.2 to 30.5)                       | -3.4 (-13.3 to 6.9)                                           | 224000<br>(201000 to 237000)    | 21.1 (19.4 to 22.1)                       | -3.7 (-6.7 to -0.7)                                           | 4310000<br>(4010000 to 4510000)    | 461.9 (436.4 to 481.2)                    | -5.5 (-8.7 to -2.3)                                           |
| High-middle SDI | Both   | 671000<br>(603000 to 735000)    | 32.6 (29.3 to 35.7)                       | -4.9 (-14.7 to 5.8)                                           | 614000<br>(559000 to 670000)    | 29.9 (27.2 to 32.6)                       | -7.1 (-15.6 to 2.3)                                           | 14000000<br>(12700000 to 15300000) | 680.7 (620.1 to 743.5)                    | -9.6 (-17.9 to -0.2)                                          |
|                 | Male   | 479000<br>(422000 to 539000)    | 51.9 (45.7 to 58.4)                       | -9.3 (-20.4 to 2.7)                                           | 439000<br>(390000 to 491000)    | 48.3 (43.1 to 53.9)                       | -11.4 (-21.2 to 0.1)                                          | 10100000<br>(8960000 to 11300000)  | 1064.2 (943.6 to 1187.2)                  | -13.4 (-23.4 to -1.9)                                         |
|                 | Female | 193000<br>(168000 to 222000)    | 17.1 (15 to 19.7)                         | 4.8 (-8.2 to 21.2)                                            | 175000<br>(154000 to 200000)    | 15.4 (13.6 to 17.6)                       | 2.1 (-10.5 to 17.6)                                           | 3870000<br>(3430000 to 4420000)    | 355.1 (314.9 to 404.8)                    | -0.6 (-13.3 to 14.5)                                          |

|                |        |                              |                     |                      |                              |                     |                      |                                    |                           |                       |
|----------------|--------|------------------------------|---------------------|----------------------|------------------------------|---------------------|----------------------|------------------------------------|---------------------------|-----------------------|
| Middle SDI     | Both   | 580000<br>(509000 to 650000) | 23.7 (20.8 to 26.5) | 1.2 (-11.1 to 14.1)  | 630000<br>(551000 to 712000) | 26.3 (23 to 29.7)   | -1.7 (-13.8 to 11.6) | 14900000<br>(13000000 to 16900000) | 579.4 (506.1 to 655)      | -3.1 (-15.5 to 10.3)  |
|                | Male   | 377000<br>(320000 to 435000) | 32.5 (27.6 to 37.4) | -1.5 (-16.5 to 14.8) | 436000<br>(368000 to 509000) | 38.7 (32.8 to 45)   | -3.4 (-18 to 13.2)   | 10400000<br>(8760000 to 12200000)  | 844.4 (711.1 to 986)      | -4.7 (-19.6 to 12.2)  |
|                | Female | 203000<br>(172000 to 236000) | 15.9 (13.5 to 18.5) | 7.5 (-7.5 to 24.1)   | 194000<br>(165000 to 224000) | 15.5 (13.2 to 17.8) | 3.7 (-11.8 to 19.5)  | 4470000<br>(3810000 to 5200000)    | 336.7 (287.3 to 390.8)    | 2.3 (-13.4 to 19.2)   |
| Low-middle SDI | Both   | 170000<br>(153000 to 186000) | 12.6 (11.3 to 13.8) | 4.8 (-6 to 14.5)     | 174000<br>(158000 to 190000) | 13.2 (12 to 14.3)   | 3.7 (-6.4 to 12.7)   | 4400000<br>(3980000 to 4830000)    | 308.2 (278.6 to 337.5)    | 2.9 (-7.5 to 12.6)    |
|                | Male   | 118000<br>(106000 to 131000) | 18.3 (16.4 to 20.2) | 1.6 (-10.9 to 14.5)  | 122000<br>(110000 to 134000) | 19.3 (17.5 to 21.2) | 0.6 (-10.7 to 12)    | 3080000<br>(2780000 to 3400000)    | 447.9 (405.3 to 492.4)    | -0.4 (-12 to 11.4)    |
|                | Female | 51800<br>(45000 to 58900)    | 7.4 (6.4 to 8.4)    | 15.8 (1.9 to 29.5)   | 52500<br>(45800 to 59600)    | 7.7 (6.7 to 8.7)    | 14.3 (0.3 to 28.3)   | 1320000<br>(1140000 to 1510000)    | 178.5 (154.4 to 204.3)    | 14 (0 to 28.8)        |
| Low SDI        | Both   | 40800<br>(35100 to 48600)    | 8.1 (7 to 9.5)      | 4.3 (-6.2 to 15.2)   | 46000<br>(39600 to 53900)    | 9.4 (8.1 to 10.9)   | 3 (-6.9 to 13.4)     | 1220000<br>(1040000 to 1450000)    | 219.9 (188.7 to 259.9)    | 2.7 (-7.8 to 13.9)    |
|                | Male   | 29800<br>(24800 to 37200)    | 12.1 (10.1 to 14.9) | -0.2 (-11.4 to 13)   | 34700<br>(29000 to 42200)    | 14.7 (12.4 to 17.5) | -1.2 (-12.3 to 11.3) | 910000<br>(754000 to 1130000)      | 337.3 (282.2 to 412.8)    | -1.4 (-13.2 to 12.1)  |
|                | Female | 11000<br>(9620 to 12400)     | 4.2 (3.7 to 4.8)    | 20.4 (6.1 to 35.9)   | 11300<br>(9780 to 12700)     | 4.5 (3.9 to 5.1)    | 20.2 (4.9 to 36.5)   | 306000<br>(264000 to 348000)       | 106.4 (92.5 to 120.6)     | 19.6 (4.7 to 35.9)    |
| Central Asia   | Both   | 14300<br>(13000 to 15900)    | 18.9 (17.1 to 20.8) | -6.5 (-14.9 to 2.6)  | 14000<br>(12700 to 15500)    | 19 (17.3 to 20.9)   | -7 (-15.1 to 1.8)    | 387000<br>(349000 to 430000)       | 473.7 (428.6 to 523.6)    | -9 (-17.7 to 0.7)     |
|                | Male   | 11300<br>(9980 to 12600)     | 34.4 (30.7 to 38.1) | -8.4 (-17.3 to 1.6)  | 11000<br>(9720 to 12200)     | 35 (31.2 to 38.7)   | -8.7 (-17.5 to 1.1)  | 305000<br>(270000 to 343000)       | 845.2 (750.3 to 941)      | -11.1 (-20.2 to -1)   |
|                | Female | 3090 (2770 to 3450)          | 7.4 (6.7 to 8.3)    | 3.2 (-7.3 to 14.5)   | 3040 (2720 to 3380)          | 7.5 (6.8 to 8.4)    | 2.1 (-7.9 to 13.1)   | 82200 (73000 to 92400)             | 185.3 (165.2 to 207.5)    | 1 (-10.3 to 12.8)     |
| Central Europe | Both   | 84000<br>(74200 to 94800)    | 40 (35.2 to 45.2)   | -6.3 (-17.5 to 5.7)  | 81300<br>(71400 to 92200)    | 38.3 (33.6 to 43.5) | -6.7 (-18.1 to 5.4)  | 1900000<br>(1670000 to 2170000)    | 946 (823.6 to 1081.4)     | -9 (-20.8 to 3.5)     |
|                | Male   | 59800<br>(51800 to 68500)    | 64.3 (55.6 to 73.4) | -10.9 (-23.2 to 1.7) | 58000<br>(50100 to 66500)    | 62.3 (54 to 71.4)   | -11.3 (-23.1 to 1)   | 1370000<br>(1180000 to 1580000)    | 1491.8 (1283.4 to 1714.8) | -13.4 (-25.5 to -0.9) |

|                           |        |                              |                     |                      |                              |                     |                       |                                 |                           |                        |
|---------------------------|--------|------------------------------|---------------------|----------------------|------------------------------|---------------------|-----------------------|---------------------------------|---------------------------|------------------------|
|                           | Female | 24200<br>(21000 to 27700)    | 20.9 (18.1 to 24)   | 4.2 (-9.4 to 19.7)   | 23400<br>(20400 to 26500)    | 19.6 (17.1 to 22.4) | 4 (-9.3 to 18.7)      | 528000<br>(459000 to 605000)    | 490 (424.3 to 563.6)      | 1.5 (-11.8 to 16.7)    |
| Eastern Europe            | Both   | 86300<br>(76600 to 97000)    | 25 (22.2 to 28.1)   | -8.4 (-18.8 to 2.5)  | 78700<br>(69600 to 88000)    | 22.7 (20.1 to 25.3) | -10.3 (-20.6 to 0.2)  | 1980000<br>(1750000 to 2220000) | 588.5 (518.6 to 658.3)    | -11.2 (-21.6 to -0.3)  |
|                           | Male   | 69200<br>(59600 to 79400)    | 51.1 (44.1 to 58.4) | -13.3 (-25 to -1.2)  | 63100<br>(54500 to 72000)    | 47.3 (40.9 to 53.9) | -14.8 (-26.2 to -3.1) | 1620000<br>(1400000 to 1860000) | 1176.2 (1015.8 to 1345.3) | -15.4 (-27.1 to -3.2)  |
|                           | Female | 17100<br>(14700 to 19900)    | 8.2 (7 to 9.6)      | 6.3 (-9.5 to 25.3)   | 15600<br>(13400 to 18100)    | 7.3 (6.2 to 8.5)    | 3.2 (-12 to 20.6)     | 358000<br>(305000 to 419000)    | 183.1 (154.9 to 215.4)    | 2.7 (-13.3 to 21.2)    |
| Australasia               | Both   | 15300<br>(12500 to 18700)    | 30.7 (25 to 37.5)   | -8.6 (-25.2 to 11.4) | 12000<br>(11100 to 12800)    | 23.8 (22.1 to 25.1) | -9 (-13 to -4.7)      | 237000<br>(223000 to 250000)    | 500.9 (473 to 526.3)      | -9.7 (-13.6 to -5.5)   |
|                           | Male   | 8830 (7170 to 11000)         | 37.6 (30.4 to 46.8) | -13.2 (-29.9 to 8.6) | 7070 (6560 to 7530)          | 29.9 (27.8 to 31.8) | -12.8 (-17.5 to -7.8) | 138000<br>(129000 to 146000)    | 605.8 (568.5 to 641.5)    | -13.1 (-18.1 to -8.3)  |
|                           | Female | 6470 (5230 to 7780)          | 24.8 (20.1 to 30)   | -2.7 (-19.6 to 18.2) | 4970 (4420 to 5380)          | 18.6 (16.8 to 20)   | -4.2 (-9.8 to 2.1)    | 99700 (91100 to 107000)         | 407.8 (376.3 to 436.6)    | -4.9 (-10.4 to 1.2)    |
| High-income Asia Pacific  | Both   | 151000<br>(127000 to 173000) | 31.6 (27 to 36.3)   | -9.5 (-19.5 to 2.4)  | 111000<br>(96100 to 119000)  | 22.2 (19.7 to 23.6) | -10.5 (-12.9 to -8.3) | 1830000<br>(1650000 to 1930000) | 427.4 (395.7 to 448.3)    | -13.6 (-16.2 to -11)   |
|                           | Male   | 106000<br>(89300 to 125000)  | 50.6 (42.9 to 59.6) | -14 (-26.5 to 0.6)   | 76800<br>(69000 to 81500)    | 36.2 (32.8 to 38.3) | -15.4 (-18 to -12.9)  | 1320000<br>(1220000 to 1390000) | 670.8 (624.5 to 704.7)    | -17.5 (-20.5 to -14.6) |
|                           | Female | 45100<br>(35700 to 53400)    | 16.5 (13.6 to 19.2) | -2.4 (-15.3 to 11.7) | 34200<br>(27100 to 38200)    | 11.4 (9.6 to 12.4)  | -3.4 (-6.9 to 0.3)    | 512000<br>(438000 to 556000)    | 219.8 (197.3 to 234.7)    | -6.6 (-10.4 to -2.9)   |
| High-income North America | Both   | 285000<br>(250000 to 325000) | 45 (39.5 to 51.4)   | -10.2 (-21.3 to 1.7) | 230000<br>(216000 to 239000) | 35.9 (33.8 to 37.3) | -9.7 (-12.1 to -7.5)  | 4670000<br>(4460000 to 4820000) | 762 (729.6 to 787.1)      | -11.1 (-13.5 to -8.8)  |
|                           | Male   | 154000<br>(129000 to 184000) | 52.9 (44.4 to 63.3) | -11.9 (-25.8 to 4.7) | 127000<br>(121000 to 131000) | 43.7 (41.7 to 45.2) | -11.4 (-13.3 to -8.8) | 2610000<br>(2520000 to 2690000) | 909.9 (879.9 to 938.5)    | -12.5 (-14.4 to -9.7)  |
|                           | Female | 132000<br>(110000 to 157000) | 38.5 (31.9 to 46)   | -9 (-24.1 to 8.6)    | 104000<br>(94600 to 110000)  | 29.5 (27.2 to 31.4) | -8.5 (-12.9 to -4.3)  | 2060000<br>(1930000 to 2180000) | 634.5 (595.6 to 669.5)    | -9.7 (-14.4 to -5.4)   |
| Southern Latin America    | Both   | 19700<br>(15700 to 24500)    | 23.6 (18.8 to 29.5) | -4.7 (-24.8 to 19.7) | 19600<br>(18500 to 20600)    | 23.5 (22 to 24.6)   | -6 (-10.5 to -1.5)    | 442000<br>(418000 to 465000)    | 540.9 (512.1 to 569)      | -8 (-12.8 to -3.4)     |

|                        |        |                              |                     |                       |                              |                     |                        |                                 |                        |                        |
|------------------------|--------|------------------------------|---------------------|-----------------------|------------------------------|---------------------|------------------------|---------------------------------|------------------------|------------------------|
|                        | Male   | 13100<br>(10300 to 16400)    | 35.4 (28 to 44.4)   | -9.9 (-28.8 to 13)    | 13100<br>(12400 to 13800)    | 35.7 (33.7 to 37.6) | -11.1 (-15.8 to -6.3)  | 298000<br>(283000 to 314000)    | 800.6 (760.3 to 843.3) | -12.9 (-17.4 to -8)    |
|                        | Female | 6580 (5280 to 8200)          | 14.3 (11.4 to 17.8) | 7 (-14.4 to 35)       | 6560 (5990 to 7010)          | 14 (12.8 to 14.9)   | 5.3 (-2.3 to 13.6)     | 144000<br>(133000 to 154000)    | 325.7 (301.6 to 348.7) | 3.2 (-4.3 to 11.7)     |
| Western Europe         | Both   | 301000<br>(263000 to 341000) | 34.5 (30.1 to 39.4) | -8.3 (-19.6 to 3.7)   | 261000<br>(244000 to 270000) | 29 (27.4 to 30)     | -8.9 (-11.1 to -6.9)   | 5270000<br>(5030000 to 5450000) | 654 (628.1 to 675.5)   | -11 (-13.5 to -8.7)    |
|                        | Male   | 197000<br>(171000 to 225000) | 49.1 (42.5 to 56.2) | -13.9 (-25.5 to -1.6) | 174000<br>(165000 to 180000) | 42.5 (40.5 to 44.1) | -14.3 (-16.8 to -12.1) | 3520000<br>(3380000 to 3650000) | 920.9 (882.8 to 954.3) | -15.8 (-18.6 to -13.4) |
|                        | Female | 103000<br>(90500 to 118000)  | 22.4 (19.6 to 25.6) | 1.4 (-10.5 to 15.4)   | 87000<br>(79600 to 91500)    | 17.9 (16.7 to 18.6) | 0.5 (-2 to 3)          | 1750000<br>(1640000 to 1820000) | 419 (398.5 to 434.6)   | -1.6 (-4.3 to 1.2)     |
| Andean Latin America   | Both   | 5970 (4810 to 7310)          | 10.8 (8.7 to 13.2)  | -5.6 (-24.3 to 17)    | 6240 (5040 to 7620)          | 11.4 (9.2 to 13.9)  | -6.7 (-24.9 to 14.9)   | 139000<br>(111000 to 172000)    | 245.1 (195.4 to 303)   | -7.6 (-27 to 15.8)     |
|                        | Male   | 3280 (2610 to 4090)          | 12.5 (9.9 to 15.5)  | -9.2 (-29.2 to 14.4)  | 3450 (2760 to 4290)          | 13.3 (10.6 to 16.5) | -10.2 (-29.5 to 12.3)  | 76200 (60300 to 95700)          | 280.1 (221.2 to 350.6) | -10.6 (-30.8 to 13)    |
|                        | Female | 2690 (2180 to 3300)          | 9.3 (7.5 to 11.3)   | -0.7 (-20.7 to 22.5)  | 2790 (2250 to 3410)          | 9.7 (7.8 to 11.8)   | -1.9 (-21.5 to 20.2)   | 62800 (50200 to 77400)          | 212.7 (170.2 to 262.6) | -3.6 (-23.9 to 21.1)   |
| Caribbean              | Both   | 11500<br>(9820 to 13500)     | 22.2 (19 to 26)     | 0.2 (-14 to 16.6)     | 11200<br>(9630 to 13100)     | 21.7 (18.6 to 25.3) | -1.1 (-14.9 to 14.6)   | 254000<br>(216000 to 299000)    | 489.1 (415.7 to 575.1) | -1.4 (-16.1 to 15.1)   |
|                        | Male   | 7520 (6410 to 8820)          | 31.1 (26.6 to 36.3) | -0.9 (-15.2 to 15.6)  | 7290 (6240 to 8510)          | 30.3 (26 to 35.4)   | -2.3 (-15.8 to 13.3)   | 166000<br>(139000 to 195000)    | 673.7 (568.5 to 791)   | -2 (-16.4 to 15)       |
|                        | Female | 3990 (3370 to 4670)          | 14.5 (12.2 to 16.9) | 3 (-11.9 to 20.2)     | 3940 (3350 to 4610)          | 14.2 (12.1 to 16.6) | 2 (-12.8 to 18.2)      | 88400 (74800 to 104000)         | 323.9 (273.9 to 382)   | 0.6 (-14.7 to 18.1)    |
| Central Latin America  | Both   | 27200<br>(23200 to 31800)    | 11.7 (10 to 13.6)   | -2.1 (-16.3 to 13)    | 27200<br>(23300 to 31900)    | 11.8 (10.1 to 13.8) | -3.6 (-17.4 to 12.3)   | 620000<br>(525000 to 735000)    | 259.9 (220.3 to 307.2) | -3.6 (-18.3 to 13.8)   |
|                        | Male   | 15900<br>(13400 to 18800)    | 15 (12.6 to 17.6)   | -5.7 (-19.7 to 10.7)  | 16400<br>(13900 to 19400)    | 15.6 (13.2 to 18.4) | -6.5 (-20.7 to 10.5)   | 371000<br>(310000 to 445000)    | 337 (282.2 to 402.3)   | -6.8 (-22.1 to 11.7)   |
|                        | Female | 11300<br>(9330 to 13700)     | 8.9 (7.4 to 10.8)   | 4.7 (-11.8 to 25.2)   | 10900<br>(8970 to 12900)     | 8.6 (7.2 to 10.3)   | 2.2 (-13.4 to 20.2)    | 249000<br>(204000 to 302000)    | 193.8 (159.2 to 234.2) | 2.6 (-14.2 to 22.3)    |
| Tropical Latin America | Both   | 37300<br>(35000 to 39100)    | 15.4 (14.5 to 16.2) | -6.7 (-10.4 to -3)    | 37900<br>(35400 to 39800)    | 15.8 (14.7 to 16.6) | -7 (-10.4 to -3.4)     | 888000<br>(844000 to 929000)    | 359.3 (341 to 376.3)   | -9.1 (-12.6 to -5.5)   |

|                              |        |                               |                     |                       |                              |                     |                      |                                    |                         |                      |
|------------------------------|--------|-------------------------------|---------------------|-----------------------|------------------------------|---------------------|----------------------|------------------------------------|-------------------------|----------------------|
|                              | Male   | 21800<br>(20500 to 23000)     | 20.3 (19 to 21.4)   | -12.6 (-17.1 to -8.2) | 22300<br>(21000 to 23600)    | 21.1 (19.7 to 22.3) | -12.7 (-17 to -8.3)  | 519000<br>(491000 to 547000)       | 462.6 (437 to 487.7)    | -15 (-19.1 to -10.6) |
|                              | Female | 15500<br>(14300 to 16400)     | 11.6 (10.7 to 12.3) | 3.7 (-2.1 to 9.5)     | 15600<br>(14300 to 16600)    | 11.7 (10.8 to 12.5) | 3.2 (-2.4 to 9)      | 368000<br>(344000 to 392000)       | 275.1 (256.4 to 292.9)  | 1.1 (-4.6 to 6.7)    |
| North Africa and Middle East | Both   | 71700<br>(63400 to 81000)     | 16.8 (14.9 to 19)   | 1 (-10.4 to 14)       | 72500<br>(64100 to 81900)    | 17.5 (15.6 to 19.8) | 0.6 (-10.5 to 13.3)  | 1870000<br>(1650000 to 2120000)    | 406.7 (359.1 to 459.5)  | -1.4 (-12.8 to 11.2) |
|                              | Male   | 55800<br>(49100 to 63500)     | 25.8 (22.7 to 29.2) | -3.2 (-14.8 to 10.5)  | 57100<br>(50300 to 64700)    | 27.2 (24 to 30.6)   | -3.1 (-14.3 to 10.1) | 1470000<br>(1290000 to 1680000)    | 629.3 (554.1 to 713.7)  | -5.1 (-16.9 to 8.6)  |
|                              | Female | 15800<br>(13600 to 18200)     | 7.6 (6.6 to 8.7)    | 17.9 (2.9 to 32.1)    | 15400<br>(13300 to 17700)    | 7.7 (6.6 to 8.8)    | 15.5 (0.8 to 29.3)   | 398000<br>(343000 to 459000)       | 174.9 (151.1 to 201.6)  | 13.9 (-0.9 to 27.8)  |
| South Asia                   | Both   | 117000<br>(100000 to 134000)  | 8.4 (7.1 to 9.5)    | 6.6 (-8.9 to 22.4)    | 120000<br>(101000 to 137000) | 8.8 (7.4 to 10.1)   | 6 (-9.4 to 21.3)     | 3090000<br>(2620000 to 3550000)    | 208.5 (176.6 to 239.6)  | 5 (-10.6 to 20.6)    |
|                              | Male   | 85400<br>(69700 to 102000)    | 12.4 (10.2 to 14.7) | 0.3 (-17.8 to 20.3)   | 87200<br>(71200 to 103000)   | 13 (10.7 to 15.3)   | -0.2 (-18.1 to 18.4) | 2240000<br>(1840000 to 2650000)    | 306.7 (251 to 362)      | -1.3 (-19.9 to 18)   |
|                              | Female | 31800<br>(26000 to 38200)     | 4.5 (3.7 to 5.4)    | 31.6 (6.5 to 61.1)    | 32500<br>(26600 to 39100)    | 4.7 (3.9 to 5.6)    | 30.8 (5 to 60.4)     | 847000<br>(692000 to 1030000)      | 112.8 (92.2 to 136.9)   | 29.9 (3.8 to 60.2)   |
| East Asia                    | Both   | 855000<br>(721000 to 1000000) | 41.3 (35 to 48.1)   | 0.3 (-16.9 to 19.2)   | 778000<br>(658000 to 907000) | 38.4 (32.7 to 44.6) | -4 (-19.2 to 14.1)   | 17600000<br>(14800000 to 20700000) | 825.8 (696.8 to 969.5)  | -5.3 (-21.4 to 13.7) |
|                              | Male   | 590000<br>(467000 to 723000)  | 61.1 (48.9 to 73.9) | -1 (-21.7 to 24)      | 537000<br>(427000 to 661000) | 57.5 (46.3 to 69.7) | -5.4 (-24.9 to 17.4) | 12300000<br>(9700000 to 15300000)  | 1195.5 (950 to 1478)    | -6.3 (-27.1 to 18.2) |
|                              | Female | 265000<br>(213000 to 322000)  | 24.6 (19.8 to 29.9) | 4.2 (-16.1 to 29.6)   | 242000<br>(196000 to 289000) | 22.7 (18.5 to 27.2) | -0.4 (-20.1 to 22.5) | 5330000<br>(4310000 to 6510000)    | 489.7 (396.1 to 597.2)  | -1.6 (-22.5 to 22.3) |
| Oceania                      | Both   | 1480 (1120 to 2100)           | 21.6 (16.6 to 30.4) | 4.1 (-8.7 to 19.6)    | 1490 (1130 to 2110)          | 22.9 (17.8 to 32)   | 4.2 (-8.6 to 19.5)   | 41900 (31300 to 59700)             | 539.6 (407.5 to 764)    | 3.7 (-9.6 to 21.2)   |
|                              | Male   | 1170 (857 to 1720)            | 33.5 (25.2 to 48.6) | 1.9 (-11.3 to 18.6)   | 1170 (865 to 1730)           | 35.8 (27.2 to 51.5) | 1.8 (-11.2 to 18.1)  | 33200 (23900 to 49600)             | 827.3 (611.2 to 1218.6) | 1.9 (-12 to 19.6)    |
|                              | Female | 313 (234 to 438)              | 9.5 (7.1 to 13.2)   | 11.7 (-4.1 to 31.4)   | 316 (236 to 443)             | 10 (7.5 to 13.9)    | 11.8 (-3.7 to 31.9)  | 8780 (6490 to 12400)               | 236 (176.1 to 330.2)    | 10.7 (-6 to 31)      |
| Southeast Asia               | Both   | 133000<br>(111000 to 154000)  | 22 (18.4 to 25.4)   | 2.4 (-10.1 to 16.3)   | 135000<br>(113000 to 156000) | 23 (19.2 to 26.6)   | 1.7 (-10.4 to 13.6)  | 3430000<br>(2860000 to 3970000)    | 532.9 (445.9 to 615.8)  | 0.4 (-12.1 to 12.9)  |



|                             |        |                            |                     |                      |                            |                     |                       |                                 |                         |                       |
|-----------------------------|--------|----------------------------|---------------------|----------------------|----------------------------|---------------------|-----------------------|---------------------------------|-------------------------|-----------------------|
|                             | Male   | 91200<br>(76900 to 106000) | 33.2 (28.2 to 38.4) | 0.7 (-13.4 to 16)    | 92400<br>(78500 to 107000) | 35 (29.8 to 40.4)   | 0 (-13.3 to 13.6)     | 2380000<br>(2000000 to 2770000) | 795.2 (672.7 to 921.6)  | -1.2 (-15.1 to 13.9)  |
|                             | Female | 41300<br>(31600 to 51800)  | 12.8 (9.8 to 15.9)  | 6.5 (-8.4 to 22.1)   | 42200<br>(32100 to 52600)  | 13.4 (10.2 to 16.6) | 6 (-9 to 20.7)        | 1050000<br>(797000 to 1320000)  | 308.5 (233.1 to 387.3)  | 4.3 (-10.9 to 20.3)   |
| Central Sub-Saharan Africa  | Both   | 6800 (4410 to 11700)       | 12.7 (8.4 to 21.2)  | 6.4 (-11 to 29.6)    | 6890 (4470 to 11700)       | 13.5 (8.9 to 22.3)  | 6.4 (-10.3 to 29.7)   | 195000<br>(126000 to 339000)    | 328.9 (212.8 to 560.8)  | 5.3 (-12.3 to 30)     |
|                             | Male   | 5190 (3140 to 9930)        | 21.9 (13.5 to 41.1) | 0.2 (-16 to 22.5)    | 5250 (3200 to 9990)        | 23.3 (14.5 to 43.5) | 0.2 (-15.4 to 22.7)   | 150000<br>(89500 to 289000)     | 554.4 (338.7 to 1050.2) | -0.7 (-16.8 to 23.1)  |
|                             | Female | 1610 (1210 to 2190)        | 5.6 (4.2 to 7.8)    | 24.3 (-1.9 to 56.9)  | 1640 (1230 to 2240)        | 6 (4.5 to 8.4)      | 24.2 (-1.3 to 56)     | 45100 (33400 to 60800)          | 142.5 (106.9 to 194.1)  | 23.1 (-2.9 to 56.2)   |
| Eastern sub-Saharan Africa  | Both   | 10900<br>(9170 to 13300)   | 7 (5.9 to 8.5)      | 3.1 (-7.8 to 14.2)   | 11400<br>(9630 to 13900)   | 7.6 (6.5 to 9.1)    | 3.1 (-7.7 to 14.3)    | 298000<br>(248000 to 366000)    | 173.3 (145.5 to 211)    | 2.4 (-9.1 to 14.2)    |
|                             | Male   | 7890 (6530 to 9830)        | 10.9 (9.1 to 13.5)  | -0.9 (-12.9 to 11.4) | 8290 (6930 to 10300)       | 11.9 (10 to 14.6)   | -0.8 (-12.5 to 11.7)  | 212000<br>(175000 to 266000)    | 263.2 (219.6 to 326.8)  | -1.7 (-14.2 to 11.8)  |
|                             | Female | 3050 (2520 to 3630)        | 3.6 (3 to 4.3)      | 17.8 (2.4 to 34.7)   | 3160 (2610 to 3720)        | 3.9 (3.3 to 4.5)    | 17.4 (2.6 to 34.4)    | 86400 (70200 to 104000)         | 92.2 (75.7 to 109.5)    | 16.9 (1.2 to 34.5)    |
| Southern sub-Saharan Africa | Both   | 10300<br>(9340 to 11500)   | 18.4 (16.7 to 20.3) | -10.3 (-18.8 to 0.7) | 10500<br>(9520 to 11600)   | 19.2 (17.5 to 21.2) | -10.2 (-18.2 to 1.2)  | 271000<br>(244000 to 304000)    | 455.7 (411.9 to 509.5)  | -13.3 (-22.1 to -1.1) |
|                             | Male   | 6930 (6170 to 7910)        | 29.4 (26.4 to 33.3) | -13.3 (-22.9 to 0.1) | 6980 (6260 to 7960)        | 30.8 (27.8 to 34.7) | -13.7 (-22.7 to -0.1) | 189000<br>(168000 to 217000)    | 732.2 (653.7 to 838.6)  | -16.3 (-25.7 to -2.1) |
|                             | Female | 3350 (2980 to 3720)        | 10.5 (9.4 to 11.7)  | -4.4 (-15 to 8.1)    | 3490 (3100 to 3870)        | 11.2 (10 to 12.3)   | -3.5 (-13.8 to 8.3)   | 82500 (72300 to 92500)          | 248 (218.2 to 277.3)    | -6.9 (-18.4 to 7)     |
| Western sub-Saharan Africa  | Both   | 16200<br>(13600 to 18900)  | 9.2 (7.7 to 10.6)   | 2.5 (-12.3 to 19.8)  | 16900<br>(14200 to 19900)  | 10 (8.5 to 11.6)    | 2.4 (-11.5 to 18.5)   | 427000<br>(354000 to 512000)    | 218 (183.1 to 257.6)    | 1.9 (-12.5 to 19.6)   |
|                             | Male   | 11600<br>(9570 to 13800)   | 13.9 (11.6 to 16.4) | 0.9 (-15.6 to 23.7)  | 12200<br>(10000 to 14600)  | 15.1 (12.6 to 18)   | 0.6 (-15.5 to 21.4)   | 302000<br>(246000 to 368000)    | 328.1 (269.5 to 396.6)  | 0.6 (-16.6 to 22.2)   |
|                             | Female | 4580 (3770 to 5450)        | 4.9 (4.1 to 5.7)    | 18.5 (-1.9 to 41.4)  | 4720 (3900 to 5620)        | 5.2 (4.4 to 6.2)    | 18.4 (-0.8 to 40.7)   | 125000<br>(101000 to 151000)    | 116.9 (95.9 to 140)     | 17.8 (-3.2 to 43.1)   |
| Afghanistan                 | Both   | 1480 (871 to 2340)         | 11.7 (7.3 to 18.5)  | 0.6 (-17.1 to 27.3)  | 1490 (892 to 2360)         | 12.5 (8 to 19.7)    | 0.5 (-17.1 to 26.7)   | 44600 (25100 to 71300)          | 302.6 (179.9 to 481.2)  | 0.9 (-17.6 to 29.7)   |
|                             | Male   | 1110 (618 to 1930)         | 19.2 (11.3 to 33)   | -2.7 (-20 to 24.4)   | 1130 (641 to 1950)         | 20.6 (12.3 to 35)   | -2.4 (-19.3 to 24.4)  | 32800 (17500 to 57900)          | 486 (274.1 to 844.6)    | -3.6 (-21.1 to 24.9)  |

|                     |        |                        |                     |                      |                        |                     |                      |                           |                          |                      |
|---------------------|--------|------------------------|---------------------|----------------------|------------------------|---------------------|----------------------|---------------------------|--------------------------|----------------------|
|                     | Female | 365 (237 to 524)       | 5.1 (3.6 to 7.1)    | 18.9 (-8.1 to 53.5)  | 359 (238 to 512)       | 5.3 (3.9 to 7.3)    | 18.8 (-8 to 52.7)    | 11700 (7200 to 17400)     | 139.7 (92.8 to 198.6)    | 18 (-8.5 to 51.4)    |
| Albania             | Both   | 1170 (862 to 1570)     | 27.1 (20 to 36)     | 14.7 (-14.9 to 50.8) | 1160 (856 to 1530)     | 26.6 (19.7 to 35.2) | 12.9 (-15.8 to 47.8) | 25900 (18900 to 34800)    | 615 (448.4 to 824)       | 11.4 (-18.2 to 47.9) |
|                     | Male   | 937 (679 to 1280)      | 45.2 (32.8 to 61)   | 14.4 (-16.3 to 51.7) | 924 (670 to 1250)      | 44.8 (32.9 to 60.3) | 12.4 (-16.7 to 48)   | 20800 (14800 to 28700)    | 1016.1 (729.6 to 1393.3) | 11.5 (-19.2 to 49.2) |
|                     | Female | 237 (178 to 308)       | 10.7 (8 to 13.9)    | 18.9 (-11.2 to 53.7) | 234 (175 to 302)       | 10.4 (7.8 to 13.4)  | 16.4 (-12.3 to 50)   | 5110 (3780 to 6710)       | 241.8 (179.5 to 319.1)   | 16 (-14.1 to 50.7)   |
| Algeria             | Both   | 3190 (2460 to 4110)    | 9.8 (7.6 to 12.5)   | -3 (-23.8 to 23)     | 3290 (2540 to 4240)    | 10.5 (8.2 to 13.4)  | -3.4 (-24 to 22.6)   | 81400 (61900 to 105000)   | 231.8 (178 to 298.7)     | -4.8 (-25.9 to 22.1) |
|                     | Male   | 2480 (1840 to 3310)    | 14.8 (11.1 to 19.8) | -7.3 (-29.4 to 20.4) | 2590 (1930 to 3460)    | 15.9 (12 to 21.2)   | -7.4 (-28.9 to 20.1) | 63200 (46400 to 84700)    | 355.6 (263 to 474)       | -8.4 (-30.7 to 20.6) |
|                     | Female | 716 (563 to 888)       | 4.5 (3.6 to 5.4)    | 11.1 (-12.7 to 38.6) | 706 (559 to 867)       | 4.6 (3.7 to 5.6)    | 9.1 (-13.6 to 35.5)  | 18200 (14200 to 22600)    | 102.8 (80.7 to 127.5)    | 7.9 (-16.1 to 35.8)  |
| American Samoa      | Both   | 12 (11 to 14)          | 26.5 (23 to 30.1)   | -0.8 (-13.2 to 12.8) | 13 (11 to 14)          | 28 (24.3 to 31.7)   | -0.8 (-12.9 to 12.8) | 317 (267 to 369)          | 637.6 (541.4 to 739.5)   | -1 (-14 to 13.7)     |
|                     | Male   | 9 (7 to 10)            | 38.6 (33.4 to 43.7) | -5.4 (-18.5 to 8.8)  | 9 (8 to 10)            | 41 (35.8 to 46.4)   | -5.7 (-18.4 to 7.9)  | 222 (186 to 259)          | 920.3 (784.4 to 1063.1)  | -5.1 (-18.8 to 10.8) |
|                     | Female | 4 (3 to 5)             | 15.7 (12.5 to 19.6) | 11.5 (-11.4 to 39.9) | 4 (3 to 5)             | 16.5 (13.1 to 20.6) | 11.5 (-11.3 to 40.2) | 95 (75 to 120)            | 374.2 (295.8 to 471)     | 11.5 (-10.8 to 39.8) |
| Andorra             | Both   | 55 (43 to 70)          | 39.5 (30.5 to 49.9) | -4.3 (-22.7 to 18.5) | 48 (37 to 60)          | 34.2 (26.5 to 42.9) | -4.9 (-22.6 to 16.9) | 1090 (832 to 1380)        | 783.3 (599.5 to 994.8)   | -5.7 (-24.2 to 16.5) |
|                     | Male   | 44 (34 to 55)          | 62.1 (48.5 to 77.8) | -6.6 (-23.7 to 14.8) | 38 (30 to 48)          | 55 (43.1 to 68.7)   | -7.1 (-24 to 13.4)   | 862 (666 to 1100)         | 1212.8 (937.2 to 1542)   | -7.7 (-25.2 to 13.7) |
|                     | Female | 11 (8 to 16)           | 16.6 (11.7 to 22.8) | 9.5 (-19.5 to 48.1)  | 10 (7 to 13)           | 13.7 (9.7 to 18.6)  | 9.1 (-19.9 to 45.4)  | 224 (158 to 303)          | 333.4 (235.9 to 451.1)   | 7.8 (-20.5 to 43.6)  |
| Angola              | Both   | 1570 (1220 to 2010)    | 14 (11.3 to 17.6)   | 3.6 (-16 to 30)      | 1580 (1240 to 2030)    | 14.9 (12.1 to 18.6) | 3.3 (-15.2 to 30.4)  | 45200 (34400 to 58800)    | 358.7 (280.5 to 460.2)   | 2.2 (-17.2 to 31.5)  |
|                     | Male   | 1190 (914 to 1540)     | 23.8 (19.1 to 29.8) | 1.2 (-18.5 to 28.5)  | 1200 (931 to 1550)     | 25.4 (20.5 to 31.4) | 0.9 (-18.1 to 27.2)  | 34300 (26000 to 44900)    | 603.8 (471.5 to 772.8)   | 0.1 (-20.2 to 29.2)  |
|                     | Female | 379 (285 to 511)       | 6.3 (4.8 to 8.3)    | 21.4 (-6.4 to 59.2)  | 382 (290 to 513)       | 6.7 (5.1 to 8.8)    | 21.6 (-4.7 to 57.5)  | 10800 (7960 to 14700)     | 157.8 (119.4 to 212.7)   | 19.4 (-7.8 to 57.3)  |
| Antigua and Barbuda | Both   | 10 (8 to 11)           | 9.5 (8.2 to 11)     | -2.4 (-16 to 14)     | 9 (8 to 11)            | 9.6 (8.3 to 11.1)   | -3 (-16.4 to 13.7)   | 220 (186 to 258)          | 209.8 (178 to 244.8)     | -4.2 (-18.5 to 14)   |
|                     | Male   | 6 (5 to 7)             | 12.9 (10.9 to 15.1) | -11.4 (-25.1 to 7.3) | 6 (5 to 7)             | 13.1 (11.1 to 15.3) | -11.9 (-25.3 to 6.6) | 138 (116 to 164)          | 279.2 (234.6 to 329.5)   | -13.5 (-27.5 to 5.9) |
|                     | Female | 4 (3 to 4)             | 6.6 (5.5 to 7.8)    | 14.2 (-5.4 to 38.7)  | 4 (3 to 4)             | 6.7 (5.6 to 7.9)    | 13.5 (-4.9 to 36.3)  | 82 (67 to 98)             | 148.4 (123.1 to 177.7)   | 13.1 (-7.1 to 39.1)  |
| Argentina           | Both   | 13900 (11000 to 17400) | 25.9 (20.5 to 32.5) | -3.6 (-24.4 to 21.7) | 13900 (13000 to 14700) | 25.7 (24.1 to 27.3) | -5.1 (-11.2 to 1.2)  | 319000 (298000 to 339000) | 607.6 (569 to 644.8)     | -7.2 (-13.3 to -0.8) |

|            |        |                        |                     |                       |                       |                     |                       |                           |                           |                        |
|------------|--------|------------------------|---------------------|-----------------------|-----------------------|---------------------|-----------------------|---------------------------|---------------------------|------------------------|
|            | Male   | 9440 (7380 to 11900)   | 39.8 (31.2 to 49.9) | -8.2 (-27.8 to 15.4)  | 9460 (8840 to 10100)  | 40.1 (37.5 to 42.8) | -9.5 (-15.5 to -2.7)  | 219000 (204000 to 234000) | 915.5 (855.4 to 978.7)    | -11.6 (-17.6 to -4.9)  |
|            | Female | 4420 (3540 to 5590)    | 14.9 (11.9 to 19)   | 6.8 (-16.1 to 36.5)   | 4420 (3990 to 4850)   | 14.6 (13.2 to 16.1) | 5 (-5.7 to 16.1)      | 100000 (90400 to 110000)  | 353.4 (320.5 to 388.5)    | 2.9 (-7.6 to 14)       |
| Armenia    | Both   | 1350 (1130 to 1600)    | 31.8 (26.7 to 37.7) | -9.5 (-23.7 to 7.3)   | 1330 (1120 to 1580)   | 31.6 (26.7 to 37.3) | -10.1 (-23.5 to 6.3)  | 32500 (27100 to 38700)    | 772.1 (644 to 919.5)      | -12.4 (-26.6 to 4.7)   |
|            | Male   | 1110 (925 to 1320)     | 60.7 (51 to 72.1)   | -10.5 (-25 to 6.5)    | 1090 (916 to 1300)    | 60.6 (51 to 71.7)   | -11 (-25.1 to 5.3)    | 27000 (22400 to 32400)    | 1456.8 (1215.4 to 1753.3) | -13.3 (-27.6 to 3.9)   |
|            | Female | 241 (201 to 285)       | 10.2 (8.5 to 12.1)  | -4.8 (-21.8 to 13.6)  | 243 (202 to 285)      | 10.2 (8.5 to 12)    | -5.6 (-22 to 12.5)    | 5540 (4560 to 6580)       | 242.6 (198.6 to 288.3)    | -8 (-25.1 to 10.8)     |
| Australia  | Both   | 12800 (10000 to 16100) | 30.4 (23.9 to 38.4) | -9.4 (-28.7 to 14.2)  | 10000 (9210 to 10700) | 23.5 (21.7 to 25)   | -9.4 (-14.2 to -4.5)  | 196000 (183000 to 208000) | 491.6 (461.2 to 520.1)    | -10.1 (-14.8 to -5)    |
|            | Male   | 7520 (5760 to 9600)    | 38 (29.2 to 48.5)   | -14 (-33.4 to 9.9)    | 6010 (5540 to 6450)   | 30.1 (27.9 to 32.3) | -13.2 (-18.5 to -7.3) | 117000 (108000 to 125000) | 608.5 (567.6 to 650.2)    | -13.5 (-19.2 to -7.7)  |
|            | Female | 5280 (4110 to 6610)    | 24 (18.8 to 30.3)   | -3.1 (-23.7 to 23)    | 4030 (3560 to 4400)   | 17.8 (15.9 to 19.3) | -4.4 (-11.3 to 3.1)   | 79800 (72400 to 86600)    | 387.1 (353.3 to 418.9)    | -4.9 (-12.2 to 2)      |
| Austria    | Both   | 5120 (4160 to 6260)    | 30.5 (24.7 to 37.4) | -10.5 (-27.5 to 10.5) | 4210 (3920 to 4460)   | 24.3 (22.9 to 25.7) | -10.6 (-15.6 to -5.7) | 90300 (85200 to 95400)    | 566.3 (533.5 to 596.7)    | -13.7 (-19 to -8.7)    |
|            | Male   | 3100 (2500 to 3810)    | 40 (32.2 to 49.2)   | -18.2 (-34.7 to 1.7)  | 2630 (2440 to 2810)   | 33.4 (31.2 to 35.7) | -17.8 (-23.6 to -12)  | 56200 (52400 to 60000)    | 744.8 (693.6 to 795.4)    | -20.5 (-26.5 to -14.7) |
|            | Female | 2020 (1650 to 2490)    | 22.7 (18.6 to 28.1) | 2.3 (-17.3 to 25.7)   | 1590 (1440 to 1730)   | 17 (15.5 to 18.5)   | 1.2 (-7.1 to 9.6)     | 34200 (31200 to 37100)    | 412.3 (379.5 to 446.5)    | -1.3 (-9.6 to 7.6)     |
| Azerbaijan | Both   | 2380 (1750 to 3040)    | 23.5 (17.4 to 29.5) | 0.2 (-18.8 to 22.7)   | 2300 (1690 to 2920)   | 23.6 (17.5 to 29.7) | -0.2 (-18.5 to 22)    | 67400 (49100 to 86500)    | 615.5 (453.5 to 778.5)    | -1.9 (-21.2 to 20.6)   |
|            | Male   | 1920 (1300 to 2560)    | 41.4 (28.3 to 54.1) | 0.1 (-22.6 to 28.1)   | 1850 (1250 to 2450)   | 41.6 (28.5 to 54)   | -0.3 (-22.8 to 27)    | 55000 (37100 to 73900)    | 1083.2 (739 to 1437)      | -1.8 (-24.8 to 26.9)   |
|            | Female | 454 (350 to 577)       | 8.9 (7 to 11.4)     | 2.7 (-18 to 28.6)     | 444 (346 to 567)      | 9.2 (7.1 to 11.7)   | 2.3 (-18.2 to 27)     | 12400 (9430 to 15600)     | 222.5 (172.7 to 281.1)    | -0.7 (-22.1 to 25.7)   |
| Bahamas    | Both   | 57 (47 to 71)          | 14.5 (11.9 to 17.9) | -4.9 (-22.1 to 17.1)  | 56 (46 to 69)         | 14.5 (11.9 to 17.8) | -4.7 (-21.7 to 17.2)  | 1480 (1190 to 1860)       | 354.7 (287 to 443)        | -5.1 (-23.1 to 18.9)   |
|            | Male   | 40 (32 to 51)          | 22.5 (18.3 to 28)   | -6.6 (-25.1 to 16.2)  | 39 (32 to 49)         | 22.7 (18.5 to 28.1) | -6.4 (-24.9 to 15.2)  | 1050 (834 to 1330)        | 543.9 (437.5 to 687.9)    | -6.6 (-26.1 to 17.6)   |
|            | Female | 17 (14 to 21)          | 8 (6.4 to 9.8)      | -1.8 (-20.4 to 21.6)  | 17 (14 to 21)         | 8 (6.5 to 9.9)      | -2 (-20.1 to 21.1)    | 436 (344 to 546)          | 195 (154.3 to 243.7)      | -2 (-21.6 to 22.1)     |
| Bahrain    | Both   | 141 (107 to 186)       | 19.8 (15.2 to 25.1) | -18.1 (-35.6 to 2.3)  | 142 (107 to 187)      | 22.1 (17.1 to 27.7) | -18.8 (-36 to 1.2)    | 3550 (2680 to 4750)       | 392.1 (295 to 503.8)      | -19.2 (-37 to 1.7)     |
|            | Male   | 104 (75 to 142)        | 26.5 (19.9 to 34.3) | -23.2 (-41.5 to -0.5) | 106 (78 to 144)       | 30.4 (23 to 39.1)   | -23.1 (-41.1 to -0.4) | 2680 (1930 to 3710)       | 518.9 (386.9 to 684.8)    | -24.5 (-43.2 to -0.7)  |

|            |        |                      |                     |                       |                      |                     |                       |                           |                           |                        |
|------------|--------|----------------------|---------------------|-----------------------|----------------------|---------------------|-----------------------|---------------------------|---------------------------|------------------------|
|            | Female | 37 (29 to 45)        | 12.5 (10 to 15.1)   | -10.9 (-28.2 to 6.9)  | 35 (28 to 43)        | 13 (10.5 to 15.8)   | -13.5 (-30.1 to 4.4)  | 869 (682 to 1070)         | 238.5 (190 to 289.9)      | -12.6 (-30.4 to 6.2)   |
| Bangladesh | Both   | 9650 (6330 to 15100) | 7.4 (4.9 to 11.6)   | -2.8 (-28.3 to 26.9)  | 9970 (6570 to 15600) | 7.8 (5.2 to 12.1)   | -3.6 (-28.8 to 26)    | 246000 (158000 to 385000) | 181.7 (117.7 to 284.3)    | -3.7 (-28.9 to 25.9)   |
|            | Male   | 7500 (4820 to 12000) | 11.1 (7.1 to 17.7)  | -5.2 (-33.2 to 26.5)  | 7770 (5020 to 12500) | 11.6 (7.6 to 18.6)  | -6.2 (-33.5 to 25.8)  | 189000 (119000 to 310000) | 271.2 (172.1 to 441.5)    | -5.9 (-34.2 to 26.4)   |
|            | Female | 2150 (1420 to 3060)  | 3.4 (2.3 to 4.9)    | 18.2 (-8.5 to 48.5)   | 2210 (1450 to 3160)  | 3.6 (2.4 to 5.2)    | 17.2 (-9.3 to 45.9)   | 57100 (38100 to 81400)    | 85.3 (56.8 to 121.2)      | 16.8 (-10.6 to 48.4)   |
| Barbados   | Both   | 48 (39 to 57)        | 9.7 (8 to 11.5)     | 2.8 (-17 to 23.5)     | 48 (40 to 57)        | 9.7 (8 to 11.5)     | 2.7 (-16.6 to 22.4)   | 1050 (849 to 1260)        | 217.4 (175.7 to 261.9)    | 0.2 (-19.9 to 22.4)    |
|            | Male   | 31 (25 to 37)        | 13.9 (11.3 to 16.7) | 3.6 (-17.3 to 26.2)   | 31 (25 to 37)        | 13.9 (11.3 to 16.6) | 3.4 (-16.9 to 24.9)   | 679 (541 to 830)          | 307 (244.8 to 373.5)      | 0.7 (-21.2 to 24.1)    |
|            | Female | 17 (14 to 21)        | 6.2 (5 to 7.6)      | -1.5 (-21.2 to 20.3)  | 17 (14 to 21)        | 6.3 (5.1 to 7.6)    | -2 (-20.8 to 18.7)    | 370 (295 to 455)          | 142 (113.4 to 175.1)      | -2.3 (-21.9 to 21.6)   |
| Belarus    | Both   | 3800 (2920 to 4940)  | 23.9 (18.5 to 31.1) | -13.5 (-33.3 to 12.5) | 3540 (2750 to 4590)  | 22.2 (17.3 to 28.7) | -16.4 (-35.3 to 8.4)  | 89500 (68300 to 118000)   | 572 (437.2 to 748.1)      | -18 (-37.5 to 7.2)     |
|            | Male   | 3240 (2490 to 4230)  | 51.9 (40.3 to 67.2) | -16.2 (-35.3 to 8.6)  | 3020 (2330 to 3910)  | 49 (38.2 to 63.2)   | -18.9 (-37.3 to 4.3)  | 77900 (59500 to 102000)   | 1210.7 (929.2 to 1577.7)  | -20.3 (-39.2 to 3.7)   |
|            | Female | 560 (425 to 725)     | 5.7 (4.3 to 7.5)    | -0.4 (-25.6 to 30.2)  | 527 (403 to 672)     | 5.3 (4 to 6.9)      | -5 (-28.4 to 23.2)    | 11600 (8660 to 15300)     | 128.4 (94.9 to 170.9)     | -6.1 (-31.1 to 25.7)   |
| Belgium    | Both   | 8680 (6830 to 10900) | 39.8 (31 to 50.6)   | -6.7 (-27.9 to 17.6)  | 7900 (7370 to 8360)  | 35.1 (32.9 to 37.1) | -8.2 (-13 to -3)      | 162000 (152000 to 171000) | 793.4 (745.7 to 840.7)    | -11.6 (-16.7 to -6.2)  |
|            | Male   | 6060 (4750 to 7720)  | 59.8 (46.9 to 76.1) | -12.1 (-31.5 to 10.7) | 5600 (5210 to 5950)  | 54.5 (51 to 57.8)   | -13.4 (-18.8 to -7.9) | 113000 (106000 to 120000) | 1155.6 (1084.1 to 1223.2) | -16.4 (-21.2 to -11.1) |
|            | Female | 2620 (2060 to 3290)  | 23.4 (18.1 to 29.8) | 3.6 (-19.9 to 31.4)   | 2300 (2090 to 2490)  | 19.5 (17.9 to 21.1) | 2.2 (-5.8 to 10.3)    | 48900 (45100 to 52900)    | 477.1 (440.2 to 517.4)    | -1.3 (-9.2 to 7.4)     |
| Belize     | Both   | 37 (32 to 43)        | 13.3 (11.4 to 15.3) | 0.4 (-14.5 to 16.4)   | 37 (31 to 42)        | 13.5 (11.6 to 15.4) | 0 (-13.9 to 15.6)     | 979 (834 to 1140)         | 328 (280.8 to 378.6)      | 0 (-14.7 to 16.5)      |
|            | Male   | 27 (23 to 32)        | 19.4 (16.3 to 22.5) | 1.9 (-14.3 to 20.4)   | 27 (23 to 31)        | 19.6 (16.7 to 22.8) | 1.4 (-14.3 to 20.2)   | 715 (598 to 840)          | 474.9 (399 to 556.4)      | 1.8 (-14.9 to 21.6)    |
|            | Female | 10 (8 to 11)         | 7.1 (6 to 8.2)      | -2 (-16.6 to 16.1)    | 10 (8 to 11)         | 7.2 (6.1 to 8.4)    | -2.4 (-16.7 to 14.4)  | 264 (225 to 312)          | 176.7 (149.8 to 207.4)    | -2 (-17.3 to 16.9)     |
| Benin      | Both   | 485 (370 to 634)     | 10.5 (8.1 to 13.6)  | 0.3 (-17.9 to 22.4)   | 508 (392 to 664)     | 11.4 (8.9 to 14.6)  | 0.2 (-17.2 to 21.3)   | 12800 (9480 to 17100)     | 252.2 (191.4 to 331.7)    | -0.5 (-19 to 21.7)     |
|            | Male   | 351 (263 to 464)     | 16.7 (12.6 to 21.7) | -3.8 (-21.3 to 16.6)  | 368 (275 to 483)     | 18.3 (13.8 to 23.7) | -3.8 (-20.7 to 16.9)  | 9180 (6760 to 12400)      | 392.9 (296.2 to 521.2)    | -4.9 (-23 to 17.4)     |
|            | Female | 134 (104 to 175)     | 5.3 (4.1 to 6.8)    | 10.5 (-10.4 to 35.2)  | 140 (108 to 181)     | 5.7 (4.5 to 7.3)    | 10.6 (-10.4 to 35.5)  | 3640 (2680 to 4850)       | 129.7 (98.3 to 169.3)     | 10.2 (-11.8 to 36.1)   |

|                        |        |                        |                     |                       |                        |                     |                      |                           |                           |                        |
|------------------------|--------|------------------------|---------------------|-----------------------|------------------------|---------------------|----------------------|---------------------------|---------------------------|------------------------|
| Bermuda                | Both   | 35 (30 to 42)          | 26.8 (22.6 to 32.3) | -7.1 (-20.2 to 10.2)  | 32 (27 to 38)          | 24 (20.4 to 28.8)   | -9.3 (-21.7 to 7.9)  | 646 (544 to 783)          | 521.5 (437.4 to 631.1)    | -10.5 (-23.7 to 7.1)   |
|                        | Male   | 24 (21 to 29)          | 42.6 (36.5 to 50.8) | -9.8 (-23.1 to 6.8)   | 22 (19 to 26)          | 38 (32.4 to 44.9)   | -12.1 (-24.7 to 3.6) | 460 (390 to 550)          | 811.4 (684 to 970.7)      | -13.3 (-26.4 to 3.6)   |
|                        | Female | 10 (8 to 13)           | 14.1 (11.3 to 18.1) | -2.8 (-19.5 to 17.6)  | 10 (8 to 13)           | 13.1 (10.4 to 16.6) | -5.2 (-20.9 to 14.7) | 186 (149 to 237)          | 275.4 (220.4 to 351.4)    | -5.3 (-22.1 to 16.2)   |
| Bhutan                 | Both   | 43 (31 to 58)          | 7.7 (5.6 to 10.6)   | 6.8 (-11.2 to 27.7)   | 44 (32 to 61)          | 8.3 (6 to 11.3)     | 6.5 (-11.4 to 26.5)  | 1070 (764 to 1470)        | 184.2 (132.5 to 253.2)    | 5 (-13 to 26.7)        |
|                        | Male   | 31 (20 to 44)          | 11.1 (7.1 to 15.8)  | 4.1 (-14.4 to 25.2)   | 33 (21 to 46)          | 11.9 (7.6 to 16.8)  | 3.8 (-14.2 to 24.7)  | 774 (504 to 1090)         | 261.1 (167.9 to 370.9)    | 2.5 (-15.7 to 24.4)    |
|                        | Female | 12 (8 to 18)           | 4.3 (2.9 to 6.7)    | 17.7 (-3.9 to 46.7)   | 12 (8 to 19)           | 4.5 (3.1 to 7.2)    | 17.2 (-4.4 to 46.2)  | 297 (194 to 475)          | 103.6 (68.5 to 165)       | 15.4 (-5.8 to 45.2)    |
| Bolivia                | Both   | 1150 (746 to 1580)     | 13.4 (8.6 to 18.3)  | 7.4 (-13.4 to 29.3)   | 1220 (782 to 1670)     | 14.5 (9.4 to 19.9)  | 7.3 (-13.4 to 29.4)  | 28200 (18600 to 38600)    | 311.4 (204.6 to 427.4)    | 5.1 (-16.4 to 28.5)    |
|                        | Male   | 693 (424 to 988)       | 17.2 (10.4 to 24.4) | 5.5 (-15.8 to 29.2)   | 741 (450 to 1050)      | 18.9 (11.4 to 26.8) | 5.3 (-16 to 28.8)    | 16900 (10700 to 23800)    | 393.2 (243.8 to 556.9)    | 3.5 (-18 to 28)        |
|                        | Female | 454 (303 to 623)       | 10 (6.7 to 13.7)    | 10 (-10.5 to 32.7)    | 475 (318 to 653)       | 10.7 (7.2 to 14.8)  | 9.9 (-10.3 to 31.8)  | 11400 (7650 to 15500)     | 238.2 (160.7 to 324.7)    | 7.4 (-14.2 to 31.2)    |
| Bosnia and Herzegovina | Both   | 2440 (1890 to 3060)    | 40.3 (31.3 to 50.7) | -1.8 (-24.3 to 23.9)  | 2390 (1860 to 2990)    | 39.4 (30.9 to 49.4) | -2.5 (-24.7 to 22.7) | 56700 (43600 to 71900)    | 957.9 (736.3 to 1213.4)   | -3.9 (-26.6 to 22.5)   |
|                        | Male   | 1860 (1420 to 2350)    | 68.2 (52.3 to 85.8) | -5.7 (-27.7 to 20.4)  | 1830 (1400 to 2310)    | 67.5 (52.2 to 84.9) | -6.2 (-27.6 to 19.8) | 43800 (33300 to 55300)    | 1596.5 (1221.5 to 2016.3) | -7.7 (-30.2 to 18.4)   |
|                        | Female | 575 (450 to 725)       | 17.6 (13.7 to 22.2) | 9.8 (-14.7 to 40.8)   | 565 (446 to 711)       | 17.1 (13.4 to 21.6) | 8.4 (-14.5 to 37.9)  | 13000 (10100 to 16600)    | 416.5 (320.9 to 535.8)    | 8.4 (-16.6 to 39.9)    |
| Botswana               | Both   | 298 (207 to 398)       | 21.7 (15.6 to 28.6) | -1.2 (-20.6 to 22.3)  | 298 (209 to 396)       | 22.6 (16.3 to 29.7) | -1.4 (-20.5 to 21.2) | 8330 (5640 to 11300)      | 546.2 (378.3 to 727.6)    | -3.9 (-24.3 to 21)     |
|                        | Male   | 209 (146 to 270)       | 35.5 (25.4 to 44.7) | -5.7 (-23 to 15.6)    | 208 (146 to 266)       | 37.1 (26.7 to 46.6) | -5.9 (-22.6 to 14.5) | 5970 (4080 to 7830)       | 885.8 (622.2 to 1132.8)   | -8.2 (-27.2 to 14.7)   |
|                        | Female | 89 (56 to 134)         | 11.8 (7.6 to 17.4)  | 7.2 (-18.1 to 44.4)   | 90 (58 to 134)         | 12.4 (8.2 to 18.2)  | 6.1 (-19 to 41.6)    | 2360 (1460 to 3580)       | 285 (179.9 to 428.6)      | 5.5 (-21.5 to 46.5)    |
| Brazil                 | Both   | 36400 (34200 to 38200) | 15.4 (14.4 to 16.2) | -6.9 (-10.6 to -3.2)  | 37000 (34600 to 38900) | 15.8 (14.7 to 16.6) | -7.2 (-10.5 to -3.5) | 867000 (825000 to 907000) | 359.1 (340.8 to 376)      | -9.3 (-12.8 to -5.7)   |
|                        | Male   | 21100 (19900 to 22300) | 20.1 (18.9 to 21.3) | -12.9 (-17.4 to -8.5) | 21600 (20300 to 22800) | 20.9 (19.6 to 22.2) | -13 (-17.2 to -8.5)  | 503000 (476000 to 530000) | 459.5 (434.4 to 484.1)    | -15.4 (-19.4 to -10.9) |
|                        | Female | 15300 (14100 to 16200) | 11.7 (10.8 to 12.4) | 3.6 (-2.1 to 9.3)     | 15400 (14100 to 16400) | 11.8 (10.9 to 12.6) | 3.1 (-2.5 to 8.9)    | 364000 (339000 to 387000) | 277.5 (258.9 to 295.6)    | 1 (-4.6 to 6.7)        |
| Brunei                 | Both   | 116 (102 to 130)       | 46.1 (40.9 to 51.8) | -0.3 (-12.6 to 12.9)  | 103 (92 to 116)        | 44.8 (39.7 to 50.2) | -2.3 (-14.1 to 10.8) | 2580 (2270 to 2920)       | 867.7 (768.5 to 975.4)    | -1.6 (-14 to 12.9)     |
|                        | Male   | 63 (52 to 75)          | 61 (51.4 to 71.2)   | 1.1 (-16.1 to 21)     | 57 (47 to 67)          | 61.1 (52 to 71.1)   | 0.3 (-16.1 to 18)    | 1400 (1160 to 1670)       | 1086.9 (917.8 to 1259.1)  | -2.7 (-18.7 to 15)     |

|              |        |                        |                     |                      |                        |                     |                       |                           |                           |                       |
|--------------|--------|------------------------|---------------------|----------------------|------------------------|---------------------|-----------------------|---------------------------|---------------------------|-----------------------|
|              | Female | 53 (44 to 63)          | 37.9 (32.3 to 44)   | 4.7 (-13.1 to 24.7)  | 47 (40 to 54)          | 36.1 (30.5 to 42)   | 2.4 (-13.4 to 20.1)   | 1180 (980 to 1390)        | 730.8 (618.7 to 850.6)    | 3.5 (-12.7 to 21.3)   |
| Bulgaria     | Both   | 4840 (3860 to 6020)    | 36.4 (28.7 to 45.5) | -3.8 (-25.1 to 22.8) | 4610 (3700 to 5710)    | 34 (26.9 to 42.6)   | -4.3 (-25.1 to 21.5)  | 117000 (91600 to 146000)  | 934.4 (730.8 to 1181.4)   | -3.8 (-25.3 to 23.5)  |
|              | Male   | 3850 (3060 to 4820)    | 63.8 (50.3 to 79.9) | -7.7 (-28 to 18.4)   | 3630 (2890 to 4540)    | 59.7 (47.5 to 74.4) | -8.1 (-28 to 17.4)    | 93100 (73400 to 117000)   | 1595.5 (1249.6 to 2010.1) | -7.9 (-28.7 to 19.1)  |
|              | Female | 986 (772 to 1240)      | 13.5 (10.5 to 17.1) | 9.7 (-15.9 to 39.7)  | 978 (765 to 1230)      | 13 (10.1 to 16.4)   | 8.8 (-16 to 37.6)     | 23400 (18100 to 29700)    | 358.5 (274.7 to 456.6)    | 9.5 (-16.9 to 40.9)   |
| Burkina Faso | Both   | 876 (683 to 1180)      | 10 (7.9 to 13.5)    | 15 (-3.2 to 38.4)    | 908 (711 to 1230)      | 10.8 (8.5 to 14.5)  | 13.8 (-3.6 to 36.7)   | 23500 (18100 to 31400)    | 244.1 (189.7 to 329.1)    | 15.9 (-3.9 to 41.6)   |
|              | Male   | 661 (497 to 920)       | 17 (12.8 to 23.6)   | 15.4 (-3.6 to 40.8)  | 688 (518 to 958)       | 18.4 (14 to 25.5)   | 14.2 (-3.4 to 38.9)   | 17600 (13000 to 24300)    | 409.4 (306.9 to 569.2)    | 15.7 (-4.9 to 43.3)   |
|              | Female | 215 (154 to 295)       | 4.4 (3.2 to 6)      | 25.3 (5.2 to 51.5)   | 221 (159 to 301)       | 4.7 (3.4 to 6.4)    | 24.3 (4 to 49.7)      | 5910 (4140 to 8230)       | 108.1 (77.1 to 148.7)     | 27 (4.7 to 56.1)      |
| Burundi      | Both   | 312 (219 to 431)       | 7.1 (5 to 9.6)      | -1.7 (-19.7 to 19.6) | 322 (227 to 441)       | 7.6 (5.4 to 10.3)   | -1.6 (-19.3 to 19.5)  | 8780 (6060 to 12300)      | 178.1 (124.7 to 243.8)    | -2.1 (-21 to 20.1)    |
|              | Male   | 242 (169 to 334)       | 10.8 (7.7 to 14.6)  | -6.2 (-23.7 to 15.4) | 251 (177 to 347)       | 11.7 (8.4 to 15.8)  | -6.2 (-23.3 to 15.8)  | 6720 (4610 to 9380)       | 266 (186.2 to 367.7)      | -6.5 (-24.4 to 15.8)  |
|              | Female | 70 (47 to 103)         | 3.2 (2.2 to 4.6)    | 4.6 (-15.5 to 29.1)  | 71 (48 to 104)         | 3.4 (2.3 to 4.9)    | 4.6 (-15.2 to 28.1)   | 2060 (1350 to 3020)       | 82.7 (55.1 to 120.7)      | 4.3 (-16.5 to 30.4)   |
| Cabo Verde   | Both   | 71 (56 to 86)          | 17.3 (13.5 to 21.1) | 38.1 (6.1 to 71.8)   | 76 (59 to 92)          | 18.6 (14.4 to 22.8) | 39.4 (5.8 to 73.9)    | 1690 (1360 to 2030)       | 394.2 (313.5 to 476.8)    | 31.4 (2.9 to 63.2)    |
|              | Male   | 45 (33 to 56)          | 26.4 (18.7 to 33.3) | 39.7 (-1.7 to 80.5)  | 48 (35 to 60)          | 28.8 (20.3 to 36.4) | 41.9 (-1.2 to 83)     | 1090 (831 to 1360)        | 594.5 (438.3 to 738.5)    | 33 (-3.1 to 71.5)     |
|              | Female | 26 (21 to 32)          | 10.9 (8.7 to 13.3)  | 31.8 (1.5 to 68)     | 28 (22 to 34)          | 11.6 (9.2 to 14.2)  | 31.8 (-0.4 to 68.9)   | 592 (480 to 720)          | 244.7 (197.7 to 297.1)    | 25 (-1.8 to 57.5)     |
| Cambodia     | Both   | 2890 (2270 to 3580)    | 24.7 (19.4 to 30.6) | 6.1 (-12.2 to 26.2)  | 2990 (2340 to 3700)    | 26.4 (20.8 to 32.6) | 5.5 (-12.3 to 24.6)   | 76000 (58800 to 94300)    | 606.8 (473.9 to 750.7)    | 4.8 (-14.2 to 25.3)   |
|              | Male   | 2090 (1610 to 2670)    | 44.4 (34.4 to 57.8) | 3.9 (-14.4 to 24.3)  | 2170 (1670 to 2790)    | 48 (37.2 to 62.6)   | 3.4 (-14.3 to 23.8)   | 54900 (42100 to 69400)    | 1062.4 (817.7 to 1358.8)  | 1.9 (-17 to 23)       |
|              | Female | 796 (609 to 1020)      | 11.6 (9 to 14.8)    | 15.8 (-6.4 to 40.8)  | 816 (629 to 1050)      | 12.2 (9.5 to 15.4)  | 15.6 (-5.8 to 41.3)   | 21100 (16100 to 27200)    | 290.7 (222 to 372.6)      | 14 (-8.3 to 39.8)     |
| Cameroon     | Both   | 1560 (1120 to 2160)    | 13.7 (10 to 18.6)   | 1.5 (-19.5 to 25.4)  | 1610 (1160 to 2200)    | 14.7 (10.8 to 19.8) | 1.4 (-18.2 to 24.8)   | 42200 (29900 to 59100)    | 332.6 (238.7 to 458.3)    | 0 (-21.5 to 25.1)     |
|              | Male   | 1110 (792 to 1510)     | 20.5 (15 to 27.5)   | -3 (-22.4 to 21.7)   | 1140 (820 to 1540)     | 22.2 (16.2 to 29.7) | -3 (-21.8 to 20.1)    | 29700 (21100 to 41000)    | 490.2 (351.8 to 668.8)    | -4.5 (-25.1 to 21.1)  |
|              | Female | 456 (310 to 657)       | 7.6 (5.3 to 10.7)   | 14.9 (-9.6 to 43.5)  | 468 (324 to 665)       | 8.2 (5.8 to 11.3)   | 14.6 (-9.5 to 43.1)   | 12600 (8300 to 18500)     | 185.3 (126.2 to 268.1)    | 13.7 (-11.8 to 44.3)  |
| Canada       | Both   | 30300 (23600 to 38200) | 43.6 (34 to 55)     | -9.6 (-30 to 14)     | 24100 (22000 to 25600) | 34.1 (31.4 to 36.1) | -10.4 (-14.9 to -5.7) | 479000 (448000 to 506000) | 716.6 (673 to 755.8)      | -11.8 (-16.6 to -7.1) |

|                         |        |                              |                     |                       |                              |                     |                       |                                    |                          |                       |
|-------------------------|--------|------------------------------|---------------------|-----------------------|------------------------------|---------------------|-----------------------|------------------------------------|--------------------------|-----------------------|
|                         | Male   | 15900<br>(12100 to 20300)    | 48.8 (37.4 to 62.3) | -12.8 (-33.1 to 11.8) | 13000<br>(12000 to 14000)    | 40.1 (36.8 to 42.9) | -13.3 (-18.8 to -6.8) | 258000<br>(240000 to 275000)       | 807 (750.9 to 860.9)     | -14.6 (-19.9 to -8.8) |
|                         | Female | 14400<br>(11200 to 18100)    | 39.5 (30.8 to 49.9) | -6.9 (-26.4 to 18.1)  | 11000<br>(9830 to 12100)     | 29.3 (26.4 to 31.8) | -8 (-16 to -0.5)      | 222000<br>(200000 to 240000)       | 639.7 (581.8 to 690.3)   | -9.1 (-17 to -1.7)    |
| Central Africa Republic | Both   | 284 (144 to 498)             | 12.4 (6.9 to 20.9)  | -8.7 (-25.7 to 11.3)  | 289 (147 to 504)             | 13.1 (7.5 to 21.9)  | -8.7 (-25.7 to 10.7)  | 8830 (4300 to 15700)               | 343.9 (178 to 596.5)     | -9.2 (-27.1 to 12.6)  |
|                         | Male   | 236 (105 to 440)             | 23 (11.6 to 40.8)   | -10 (-26.2 to 9.7)    | 240 (108 to 444)             | 24.6 (12.6 to 43.2) | -10 (-26.3 to 9.5)    | 7400 (3140 to 14000)               | 627.4 (294.7 to 1146.1)  | -10.7 (-27.1 to 9.8)  |
|                         | Female | 49 (34 to 68)                | 4.1 (2.8 to 5.8)    | -1.6 (-25.6 to 27.8)  | 49 (34 to 68)                | 4.4 (3 to 6.1)      | -1.4 (-25.1 to 27.9)  | 1430 (976 to 2030)                 | 108.1 (74.4 to 150.7)    | -2.4 (-26.6 to 27.7)  |
| Chad                    | Both   | 625 (447 to 888)             | 11.7 (8.5 to 16.5)  | 4.2 (-14.6 to 27.3)   | 655 (470 to 926)             | 12.7 (9.2 to 17.9)  | 4 (-14.4 to 27.3)     | 16600 (11700 to 23800)             | 284.4 (202.9 to 406.3)   | 2.5 (-16.7 to 26.7)   |
|                         | Male   | 507 (355 to 758)             | 17.6 (12.4 to 26.2) | -0.6 (-18.5 to 23.4)  | 534 (373 to 800)             | 19.2 (13.6 to 28.4) | -0.9 (-18.5 to 23)    | 13300 (9230 to 19800)              | 425.6 (297.3 to 634.6)   | -1.9 (-20.8 to 22.5)  |
|                         | Female | 117 (82 to 174)              | 4.7 (3.3 to 6.9)    | 15.1 (-5.2 to 44.2)   | 120 (85 to 178)              | 5 (3.5 to 7.4)      | 15.1 (-5.1 to 43.4)   | 3270 (2280 to 4910)                | 114.7 (80.4 to 169.9)    | 14.1 (-7 to 43.7)     |
| Chile                   | Both   | 4050 (3180 to 5100)          | 16.8 (13.2 to 21.1) | -3.8 (-24.4 to 20.9)  | 4010 (3700 to 4270)          | 16.6 (15.3 to 17.7) | -5.1 (-11.3 to 0.8)   | 83700 (78000 to 88900)             | 347.2 (323.8 to 368.9)   | -6.8 (-13.1 to -0.5)  |
|                         | Male   | 2360 (1830 to 3020)          | 21.8 (16.9 to 27.8) | -9.7 (-29.7 to 15)    | 2330 (2150 to 2500)          | 21.7 (20.1 to 23.3) | -10.8 (-17.4 to -3.8) | 49800 (46200 to 53500)             | 452.5 (419.3 to 486.1)   | -12.2 (-18.9 to -4.8) |
|                         | Female | 1700 (1340 to 2120)          | 12.7 (10 to 15.8)   | 5.7 (-17.2 to 32.1)   | 1680 (1510 to 1830)          | 12.4 (11.2 to 13.6) | 4.1 (-4.4 to 13.5)    | 33800 (30800 to 36600)             | 259 (236.4 to 280)       | 2.8 (-6.3 to 12.6)    |
| China                   | Both   | 833000<br>(700000 to 982000) | 41.7 (35.2 to 48.8) | 0.5 (-17.1 to 20)     | 757000<br>(639000 to 888000) | 38.7 (32.8 to 45)   | -4 (-19.7 to 14.5)    | 17100000<br>(14300000 to 20200000) | 831.3 (699.1 to 980)     | -5.4 (-21.7 to 14.2)  |
|                         | Male   | 576000<br>(451000 to 709000) | 61.7 (48.9 to 75.2) | -0.9 (-21.7 to 24.7)  | 523000<br>(413000 to 647000) | 58.1 (46.5 to 70.9) | -5.4 (-25.3 to 17.9)  | 12000000<br>(9370000 to 15000000)  | 1203.8 (950.2 to 1495.1) | -6.4 (-27.3 to 18.9)  |
|                         | Female | 257000<br>(206000 to 314000) | 24.8 (19.9 to 30.3) | 4.3 (-16.6 to 30.4)   | 234000<br>(189000 to 283000) | 22.9 (18.5 to 27.5) | -0.4 (-20.8 to 23.3)  | 5160000<br>(4140000 to 6350000)    | 492.2 (393.7 to 604.3)   | -1.7 (-23.3 to 22.9)  |
| Colombia                | Both   | 6400 (5020 to 8150)          | 12.1 (9.5 to 15.5)  | -6.1 (-26.7 to 20.1)  | 6350 (4980 to 8060)          | 12 (9.4 to 15.3)    | -8.7 (-28.4 to 16.6)  | 136000<br>(106000 to 176000)       | 259.1 (201.9 to 333.9)   | -9.3 (-30.1 to 17.5)  |
|                         | Male   | 3340 (2550 to 4330)          | 14 (10.7 to 18.2)   | -15.3 (-35.9 to 10.6) | 3430 (2630 to 4450)          | 14.5 (11 to 18.7)   | -16.3 (-36.4 to 8.6)  | 73600 (55800 to 96800)             | 307.1 (233.4 to 403.3)   | -17.9 (-38.1 to 8.5)  |
|                         | Female | 3070 (2400 to 3870)          | 10.6 (8.3 to 13.4)  | 7.7 (-15.2 to 35.5)   | 2920 (2300 to 3680)          | 10 (7.9 to 12.6)    | 3.5 (-18.2 to 29.6)   | 62600 (49200 to 80300)             | 219.4 (172.4 to 281.1)   | 4.6 (-18.5 to 33.1)   |
| Comoros                 | Both   | 35 (26 to 47)                | 7.4 (5.5 to 9.8)    | 5 (-14.3 to 26.6)     | 37 (28 to 49)                | 7.9 (6 to 10.4)     | 4.2 (-14.8 to 25.6)   | 921 (662 to 1260)                  | 182.7 (132.5 to 245.9)   | 6.5 (-14.5 to 29.7)   |

|              |        |                     |                     |                       |                     |                     |                      |                           |                           |                       |
|--------------|--------|---------------------|---------------------|-----------------------|---------------------|---------------------|----------------------|---------------------------|---------------------------|-----------------------|
|              | Male   | 23 (16 to 32)       | 10.7 (7.8 to 15)    | 1.5 (-17.8 to 24.4)   | 24 (18 to 34)       | 11.6 (8.6 to 16.2)  | 0.9 (-17.7 to 22.9)  | 586 (406 to 855)          | 256.8 (182.8 to 369.4)    | 2.6 (-18.5 to 25.8)   |
|              | Female | 13 (9 to 16)        | 4.8 (3.4 to 6.1)    | 13 (-10.8 to 39.2)    | 13 (9 to 17)        | 5 (3.6 to 6.4)      | 12.5 (-10.2 to 37.4) | 335 (233 to 442)          | 122 (85.3 to 160)         | 14.5 (-11.5 to 43.6)  |
| Congo        | Both   | 416 (292 to 595)    | 16 (11.8 to 22.5)   | 5.9 (-14.4 to 29.9)   | 422 (301 to 602)    | 17 (12.8 to 23.6)   | 6.1 (-13.7 to 29.2)  | 11900 (8070 to 17400)     | 406.9 (289 to 583.8)      | 4.1 (-17.2 to 30.9)   |
|              | Male   | 287 (208 to 410)    | 23.3 (17.8 to 32.7) | 0.1 (-18 to 23.2)     | 292 (214 to 415)    | 24.9 (19.2 to 34.6) | 0.1 (-17.9 to 21.8)  | 8190 (5750 to 11900)      | 582.5 (428.9 to 829.8)    | -1.1 (-20.3 to 24.3)  |
|              | Female | 129 (79 to 198)     | 9.6 (6.2 to 14.2)   | 12.5 (-14.8 to 43)    | 131 (81 to 198)     | 10.1 (6.7 to 14.8)  | 12.8 (-13.5 to 42.8) | 3690 (2200 to 5780)       | 244.1 (150.2 to 372.9)    | 10.3 (-16.6 to 42.9)  |
| Cook Islands | Both   | 7 (6 to 9)          | 29.1 (24.9 to 34.3) | -1.3 (-14.9 to 14.5)  | 7 (6 to 9)          | 29.8 (25.5 to 34.9) | -2.4 (-15.2 to 12.8) | 165 (140 to 197)          | 668 (562.5 to 798)        | -1.8 (-16.5 to 14.6)  |
|              | Male   | 6 (5 to 7)          | 48.5 (41.5 to 57)   | -1.7 (-15.8 to 15.7)  | 6 (5 to 7)          | 49.9 (43 to 58.4)   | -2.9 (-16.2 to 14.4) | 135 (114 to 160)          | 1115.4 (935.8 to 1331)    | -1.9 (-17.3 to 16)    |
|              | Female | 1 (1 to 2)          | 10.8 (8.5 to 13.6)  | 7.2 (-13.6 to 33.7)   | 1 (1 to 2)          | 11.1 (8.8 to 13.8)  | 6.3 (-14 to 32.9)    | 30 (24 to 39)             | 240.5 (187.6 to 307.3)    | 5.6 (-15.9 to 32.7)   |
| Costa Rica   | Both   | 503 (390 to 634)    | 9.9 (7.7 to 12.4)   | -5 (-25.8 to 20.1)    | 492 (384 to 616)    | 9.7 (7.6 to 12.1)   | -6.8 (-26.9 to 17)   | 10500 (8140 to 13500)     | 204.9 (158.1 to 261.6)    | -7.2 (-28.9 to 19)    |
|              | Male   | 314 (241 to 401)    | 13.5 (10.4 to 17.3) | -8.2 (-29.1 to 18.6)  | 317 (247 to 405)    | 13.8 (10.7 to 17.6) | -9.4 (-30.1 to 16.4) | 6830 (5190 to 8770)       | 286.5 (218.4 to 366.4)    | -9.6 (-31 to 17.1)    |
|              | Female | 189 (146 to 239)    | 6.9 (5.3 to 8.7)    | 3.1 (-19.1 to 30.7)   | 174 (134 to 219)    | 6.3 (4.9 to 8)      | 0.8 (-21 to 26.3)    | 3720 (2860 to 4740)       | 134.7 (103.7 to 171.8)    | 0 (-22.6 to 27.5)     |
| Croatia      | Both   | 3430 (2710 to 4300) | 40.4 (31.6 to 51)   | -13.2 (-31.7 to 10.6) | 2880 (2280 to 3610) | 33.4 (26.3 to 42.1) | -15.5 (-33.3 to 7.7) | 65000 (50900 to 82400)    | 811.1 (631.8 to 1038.1)   | -17.2 (-35.7 to 6.6)  |
|              | Male   | 2520 (1980 to 3160) | 67.3 (52.8 to 84.2) | -17.1 (-35.3 to 4.4)  | 2150 (1690 to 2680) | 57 (45 to 71.2)     | -19.2 (-37 to 1.9)   | 49000 (38000 to 61900)    | 1332.5 (1030.5 to 1683.4) | -20.6 (-38.9 to 1.8)  |
|              | Female | 909 (711 to 1160)   | 19.4 (15 to 24.7)   | -6.1 (-27.8 to 21.8)  | 729 (573 to 929)    | 15.1 (11.8 to 19.4) | -9.3 (-29.9 to 18)   | 15900 (12300 to 20500)    | 374.2 (285.8 to 485.9)    | -10.1 (-31.5 to 18.2) |
| Cuba         | Both   | 6830 (5600 to 8300) | 35.9 (29.4 to 43.7) | 1 (-17.1 to 21.9)     | 6560 (5400 to 7940) | 34.2 (28.1 to 41.5) | -0.8 (-18.3 to 19.4) | 143000 (115000 to 175000) | 764.9 (617.3 to 936.6)    | -2.4 (-20.8 to 19.1)  |
|              | Male   | 4360 (3560 to 5340) | 48.8 (39.9 to 59.7) | 0.3 (-17.7 to 22)     | 4160 (3410 to 5110) | 46.5 (38.1 to 57)   | -1.8 (-19 to 18.9)   | 90200 (72600 to 111000)   | 1016.4 (818.4 to 1250.3)  | -2.9 (-21.5 to 18.6)  |
|              | Female | 2460 (2000 to 2990) | 24.6 (19.9 to 29.9) | 3.5 (-16.2 to 25.3)   | 2400 (1950 to 2900) | 23.5 (19.1 to 28.5) | 2 (-16.9 to 22.9)    | 52400 (42100 to 64200)    | 540 (434.8 to 662.1)      | -0.5 (-20 to 21.3)    |
| Cyprus       | Both   | 514 (444 to 592)    | 26 (22.6 to 30)     | -7.3 (-20.9 to 7.6)   | 462 (404 to 525)    | 23.4 (20.5 to 26.6) | -8.4 (-20.5 to 4.7)  | 9680 (8510 to 10900)      | 496.5 (437.3 to 562.2)    | -8.7 (-20.2 to 3.1)   |
|              | Male   | 398 (330 to 469)    | 42.3 (35.1 to 49.9) | -12.2 (-27.6 to 5.5)  | 358 (309 to 412)    | 38.4 (33.1 to 44.4) | -14.4 (-27 to 0.1)   | 7500 (6530 to 8560)       | 796.9 (695.1 to 911.4)    | -12 (-23.7 to 1.5)    |
|              | Female | 116 (95 to 138)     | 11.4 (9.4 to 13.6)  | -1.9 (-19.8 to 17.1)  | 104 (88 to 121)     | 10.2 (8.7 to 11.8)  | -1.4 (-17.1 to 13.5) | 2180 (1840 to 2520)       | 219.2 (186.6 to 253.9)    | -3.7 (-18.9 to 11.6)  |



|                                  |        |                      |                     |                       |                      |                     |                        |                           |                          |                        |
|----------------------------------|--------|----------------------|---------------------|-----------------------|----------------------|---------------------|------------------------|---------------------------|--------------------------|------------------------|
| Czechia                          | Both   | 6940 (5700 to 8450)  | 32.9 (26.9 to 40.1) | -16.5 (-31.9 to 2.5)  | 6240 (5140 to 7580)  | 29.2 (24 to 35.5)   | -17.3 (-32.3 to 1.2)   | 134000 (109000 to 164000) | 664.4 (539.7 to 817.7)   | -20 (-35.6 to -1.6)    |
|                                  | Male   | 4690 (3810 to 5780)  | 49.8 (40.5 to 61.1) | -22 (-36.6 to -4.2)   | 4240 (3480 to 5180)  | 45 (37 to 54.9)     | -22.6 (-36.6 to -4.9)  | 91900 (74900 to 113000)   | 990 (804.7 to 1219)      | -25.2 (-39.7 to -7.5)  |
|                                  | Female | 2250 (1810 to 2760)  | 19.5 (15.7 to 24)   | -5.9 (-24 to 16.1)    | 2000 (1620 to 2430)  | 16.8 (13.6 to 20.6) | -7 (-24.7 to 14.5)     | 41600 (33400 to 51000)    | 389.6 (312.9 to 482.5)   | -8.7 (-26.7 to 13.6)   |
| Côte d'Ivoire                    | Both   | 1280 (940 to 1650)   | 12.8 (9.7 to 16.3)  | 1.1 (-18.8 to 25.8)   | 1310 (965 to 1690)   | 13.8 (10.5 to 17.5) | 1.2 (-18.7 to 24.8)    | 35100 (25300 to 46300)    | 309.3 (228 to 396.9)     | 0.3 (-20.8 to 27.3)    |
|                                  | Male   | 986 (711 to 1290)    | 19.3 (14.2 to 24.8) | -3.1 (-22.2 to 22.5)  | 1010 (736 to 1320)   | 21 (15.6 to 26.8)   | -2.9 (-21.3 to 21.5)   | 26900 (19200 to 35300)    | 459.1 (334 to 597)       | -4 (-24.2 to 23.4)     |
|                                  | Female | 293 (221 to 377)     | 6.1 (4.7 to 7.6)    | 14.9 (-9.9 to 44.5)   | 300 (231 to 383)     | 6.5 (5.1 to 8.2)    | 14.7 (-9.4 to 42.7)    | 8230 (6000 to 10800)      | 146.2 (111.2 to 187.4)   | 14.6 (-11.9 to 48.2)   |
| North Korea                      | Both   | 9040 (7010 to 11500) | 27.9 (21.8 to 35.2) | -2.1 (-16.6 to 14.4)  | 9160 (7160 to 11500) | 28.5 (22.5 to 35.8) | -2.4 (-16.2 to 13.7)   | 235000 (178000 to 306000) | 712.3 (539.3 to 920.2)   | -3.1 (-18 to 14.9)     |
|                                  | Male   | 6060 (4410 to 8120)  | 45.7 (33.8 to 59.9) | -7 (-21.2 to 9.6)     | 6070 (4440 to 8080)  | 47.5 (35.3 to 61.5) | -7.4 (-20.8 to 9)      | 162000 (114000 to 221000) | 1126.9 (815.7 to 1514.4) | -7.7 (-22.2 to 9.7)    |
|                                  | Female | 2980 (2140 to 3880)  | 15.9 (11.4 to 20.7) | 1.5 (-18.7 to 24.3)   | 3090 (2240 to 3990)  | 16.3 (11.8 to 21.1) | 0.8 (-19 to 21.8)      | 73700 (52200 to 98900)    | 403.1 (281.9 to 545.1)   | 0.9 (-20.4 to 24.6)    |
| Democratic Republic of the Congo | Both   | 4250 (2250 to 8570)  | 11.9 (6.3 to 23.3)  | 8.5 (-11.2 to 38.2)   | 4310 (2290 to 8650)  | 12.5 (6.6 to 24.4)  | 8.4 (-11.2 to 38.5)    | 122000 (65300 to 247000)  | 306.9 (162.8 to 617)     | 7.8 (-12.7 to 39.9)    |
|                                  | Male   | 3280 (1580 to 7550)  | 20.7 (10 to 46.7)   | 0.7 (-17.3 to 29.6)   | 3320 (1600 to 7590)  | 22.1 (10.6 to 49.1) | 0.7 (-17.4 to 28.7)    | 95000 (45300 to 221000)   | 524.4 (253.5 to 1192.4)  | 0.1 (-18.3 to 31.8)    |
|                                  | Female | 974 (609 to 1480)    | 5.1 (3.1 to 7.8)    | 28.9 (-1.5 to 73.1)   | 995 (619 to 1520)    | 5.4 (3.2 to 8.4)    | 28.7 (-2 to 72.8)      | 27000 (17000 to 40500)    | 128.1 (80.2 to 194.8)    | 28.4 (-2.7 to 72.8)    |
| Denmark                          | Both   | 4930 (3890 to 6080)  | 42.9 (33.7 to 53.1) | -19 (-36.6 to 1.3)    | 4360 (4010 to 4720)  | 37 (34.1 to 40)     | -15.9 (-21.8 to -10.1) | 85700 (79500 to 92700)    | 786.6 (730.4 to 848.6)   | -17.3 (-23 to -11.6)   |
|                                  | Male   | 2540 (1980 to 3180)  | 46.6 (36.3 to 58.7) | -23.4 (-40.6 to -3.4) | 2280 (2090 to 2460)  | 41.5 (38.2 to 44.7) | -20.3 (-26.5 to -14.3) | 44500 (41200 to 48200)    | 845.5 (781.3 to 913)     | -21.6 (-27.8 to -15.4) |
|                                  | Female | 2390 (1870 to 3000)  | 40.1 (31.1 to 50.2) | -14.7 (-33.7 to 7.2)  | 2080 (1850 to 2330)  | 33.5 (30 to 37.2)   | -11.9 (-20.1 to -3)    | 41200 (36900 to 45700)    | 739.1 (664.7 to 813.9)   | -12.9 (-21.1 to -4.4)  |
| Djibouti                         | Both   | 62 (39 to 104)       | 10.8 (7.1 to 17.4)  | 6.1 (-15.6 to 31.3)   | 63 (40 to 106)       | 11.6 (7.7 to 18.5)  | 6.1 (-14.9 to 31.2)    | 1740 (1060 to 2960)       | 266.5 (170.5 to 444.2)   | 4.5 (-18 to 30.2)      |
|                                  | Male   | 47 (28 to 86)        | 15.7 (9.6 to 27.2)  | 1.5 (-20.4 to 26.1)   | 49 (29 to 88)        | 17.1 (10.6 to 29.5) | 1.3 (-19.4 to 25)      | 1320 (760 to 2440)        | 379.3 (227 to 675.2)     | 0.3 (-21.6 to 25.7)    |
|                                  | Female | 14 (10 to 20)        | 5.2 (3.8 to 7.2)    | 15.7 (-9.7 to 47.4)   | 15 (10 to 20)        | 5.6 (4.2 to 7.6)    | 15.6 (-8.6 to 47.2)    | 419 (286 to 605)          | 133.4 (95.4 to 187.8)    | 14.2 (-12.8 to 47.5)   |
| Dominica                         | Both   | 15 (12 to 18)        | 16.9 (13.6 to 20.5) | 2.5 (-15.2 to 24)     | 16 (13 to 19)        | 17.5 (14.2 to 21.1) | 2.8 (-14.7 to 23.7)    | 357 (286 to 439)          | 402.2 (322.1 to 495.9)   | 2.2 (-15.4 to 24.7)    |

|                    |        |                     |                     |                      |                     |                     |                      |                           |                        |                       |
|--------------------|--------|---------------------|---------------------|----------------------|---------------------|---------------------|----------------------|---------------------------|------------------------|-----------------------|
|                    | Male   | 11 (9 to 13)        | 24.4 (19.6 to 29.7) | -1.1 (-20.7 to 22)   | 11 (9 to 13)        | 25.4 (20.4 to 30.9) | -1.4 (-20.1 to 21.2) | 254 (200 to 316)          | 568.7 (450.5 to 702.7) | -0.5 (-20.5 to 24.4)  |
|                    | Female | 5 (4 to 6)          | 9.9 (7.8 to 12.2)   | 5.9 (-14.3 to 30)    | 5 (4 to 6)          | 10.3 (8.2 to 12.8)  | 6.1 (-14 to 29.8)    | 103 (81 to 128)           | 235.4 (184.5 to 294)   | 6 (-14.9 to 31.6)     |
| Dominican Republic | Both   | 1410 (1020 to 1900) | 15.2 (11.1 to 20.5) | 12.2 (-20.7 to 58.1) | 1440 (1050 to 1930) | 15.8 (11.6 to 21.1) | 10.9 (-20.6 to 55.2) | 35100 (24700 to 48000)    | 367.2 (260.2 to 501.2) | 14.4 (-20.8 to 62.6)  |
|                    | Male   | 917 (656 to 1250)   | 20.8 (15.1 to 28.1) | 15 (-19.6 to 63.3)   | 931 (675 to 1270)   | 21.5 (15.8 to 28.9) | 13.4 (-19.7 to 59.1) | 22900 (15900 to 31300)    | 495 (347.3 to 677.7)   | 18.3 (-19.6 to 69.1)  |
|                    | Female | 487 (331 to 670)    | 10.2 (6.9 to 14)    | 8.3 (-24.9 to 53.1)  | 506 (347 to 689)    | 10.7 (7.3 to 14.5)  | 7.5 (-24.6 to 51.1)  | 12200 (8100 to 17000)     | 247.2 (165 to 346)     | 8.7 (-26 to 54.5)     |
| Ecuador            | Both   | 1480 (1170 to 1880) | 10.1 (8 to 12.8)    | -4.2 (-25 to 21.8)   | 1550 (1230 to 1970) | 10.8 (8.6 to 13.6)  | -5.6 (-25.4 to 19.3) | 34000 (26500 to 43700)    | 221.8 (174 to 284.6)   | -6 (-27.7 to 20.8)    |
|                    | Male   | 820 (635 to 1050)   | 11.8 (9.2 to 15.2)  | -9.1 (-30.4 to 19.2) | 867 (677 to 1110)   | 12.8 (10.1 to 16.5) | -10.5 (-31 to 16.6)  | 18700 (14300 to 24400)    | 256.2 (196.7 to 332.8) | -10.6 (-32.7 to 18.7) |
|                    | Female | 658 (521 to 831)    | 8.5 (6.7 to 10.7)   | 3.3 (-19.5 to 31)    | 685 (542 to 864)    | 9 (7.1 to 11.3)     | 2.1 (-19.7 to 28.6)  | 15300 (11900 to 19400)    | 190.7 (150.4 to 242.4) | 0.8 (-22.4 to 29.3)   |
| Egypt              | Both   | 6120 (4300 to 8310) | 9.2 (6.5 to 12.5)   | 5.1 (-20 to 35.6)    | 6070 (4270 to 8220) | 9.5 (6.7 to 12.9)   | 4.6 (-19.7 to 34.5)  | 175000 (123000 to 239000) | 240.9 (169.4 to 326.9) | 4.4 (-21.3 to 35.8)   |
|                    | Male   | 4210 (2910 to 5910) | 11.5 (8 to 16.1)    | -1.7 (-26.7 to 28.7) | 4210 (2910 to 5890) | 11.8 (8.3 to 16.7)  | -1.9 (-26.7 to 27.9) | 122000 (83900 to 172000)  | 310.4 (213.2 to 437.3) | -1.7 (-26.9 to 29.3)  |
|                    | Female | 1920 (1220 to 2770) | 6.6 (4.2 to 9.4)    | 22.2 (-10.4 to 63.3) | 1870 (1180 to 2680) | 6.8 (4.3 to 9.7)    | 20.9 (-11 to 60.8)   | 53500 (34600 to 76700)    | 162.4 (103.4 to 233.2) | 20.3 (-12.5 to 62.2)  |
| El Salvador        | Both   | 619 (469 to 797)    | 10.4 (7.9 to 13.5)  | 9.9 (-17.9 to 42)    | 632 (478 to 810)    | 10.6 (8 to 13.6)    | 8.6 (-18.5 to 39.4)  | 14100 (10500 to 18200)    | 240.2 (179.2 to 311.3) | 7.4 (-20.1 to 40.1)   |
|                    | Male   | 306 (230 to 395)    | 12.2 (9.1 to 15.8)  | 7.8 (-20.9 to 40.6)  | 321 (243 to 413)    | 12.7 (9.6 to 16.4)  | 6.9 (-21.4 to 38.4)  | 7200 (5350 to 9420)       | 288.1 (213.4 to 377.2) | 6.9 (-22.3 to 41.4)   |
|                    | Female | 313 (231 to 406)    | 9.2 (6.7 to 11.9)   | 12.9 (-18 to 47.6)   | 312 (230 to 403)    | 9 (6.6 to 11.6)     | 11.4 (-18.6 to 45.3) | 6880 (5080 to 9040)       | 204.5 (150.5 to 268.8) | 8.8 (-21.1 to 42.8)   |
| Equatorial Guinea  | Both   | 76 (49 to 117)      | 16.4 (10.8 to 24.6) | 9.9 (-15.3 to 41.1)  | 78 (50 to 119)      | 17.5 (11.7 to 25.9) | 10.1 (-14.2 to 40.3) | 2100 (1280 to 3280)       | 401 (255.8 to 618.3)   | 8.6 (-18 to 43.2)     |
|                    | Male   | 48 (29 to 74)       | 24.8 (15.6 to 37.1) | 4.5 (-16.6 to 30.1)  | 49 (30 to 75)       | 26.6 (16.8 to 39.5) | 4.4 (-16.1 to 29.1)  | 1330 (779 to 2100)        | 603.8 (370.9 to 928.5) | 4 (-18.8 to 33.2)     |
|                    | Female | 28 (17 to 46)       | 10.6 (6.5 to 16.5)  | 18.7 (-18.4 to 69.8) | 29 (17 to 46)       | 11.3 (7 to 17.2)    | 19.1 (-17.3 to 68.6) | 773 (438 to 1280)         | 256.7 (150.2 to 412)   | 16.1 (-21.8 to 70.7)  |
| Eritrea            | Both   | 226 (173 to 293)    | 8.4 (6.5 to 10.6)   | 3.8 (-15 to 25.9)    | 228 (175 to 293)    | 8.9 (6.9 to 11.1)   | 3.8 (-14.4 to 25.4)  | 6680 (5000 to 8890)       | 218.5 (167.8 to 280.2) | 1.9 (-17.4 to 24.3)   |
|                    | Male   | 151 (112 to 198)    | 13.9 (10.6 to 17.8) | -3.9 (-20.3 to 18.8) | 152 (112 to 198)    | 14.8 (11.2 to 18.8) | -3.8 (-20.3 to 17.6) | 4480 (3250 to 5980)       | 347.2 (259.1 to 448)   | -5.7 (-23.6 to 17.5)  |
|                    | Female | 75 (52 to 106)      | 4.9 (3.5 to 6.8)    | 16.1 (-9.2 to 45.9)  | 76 (53 to 106)      | 5.2 (3.7 to 7.2)    | 15.9 (-8.3 to 45.8)  | 2200 (1510 to 3110)       | 128.1 (89.3 to 179.8)  | 14.9 (-10.1 to 46)    |

|          |        |                        |                     |                       |                        |                     |                       |                           |                          |                        |
|----------|--------|------------------------|---------------------|-----------------------|------------------------|---------------------|-----------------------|---------------------------|--------------------------|------------------------|
| Estonia  | Both   | 721 (564 to 906)       | 28.3 (22 to 35.6)   | -9.8 (-29.7 to 13.6)  | 714 (561 to 896)       | 27.3 (21.3 to 34.5) | -10.6 (-30 to 12.3)   | 15100 (11700 to 19200)    | 634.3 (492 to 807.1)     | -11.7 (-31.9 to 11.8)  |
|          | Male   | 505 (396 to 644)       | 51.1 (40 to 65.2)   | -19.8 (-37.5 to 0.3)  | 505 (398 to 639)       | 51 (40.2 to 64.5)   | -20.1 (-37.5 to 0)    | 11100 (8530 to 14100)     | 1131.8 (872.9 to 1445.4) | -20.5 (-38.7 to 0.7)   |
|          | Female | 216 (167 to 273)       | 13.5 (10.4 to 17.2) | 12.1 (-14 to 43.9)    | 209 (162 to 263)       | 12.5 (9.6 to 16)    | 9.3 (-15.7 to 39.6)   | 4050 (3120 to 5200)       | 285.6 (217.9 to 370.4)   | 9.7 (-16.5 to 41.3)    |
| eSwatini | Both   | 104 (63 to 147)        | 17.8 (11.1 to 24.9) | -6.9 (-27 to 23)      | 105 (65 to 148)        | 18.7 (11.7 to 26.1) | -7.3 (-27.1 to 21.8)  | 2950 (1750 to 4310)       | 465.7 (280.4 to 666.3)   | -9.6 (-29.9 to 22.3)   |
|          | Male   | 74 (43 to 104)         | 31.3 (18.9 to 43.3) | -7.3 (-25.9 to 23.4)  | 74 (44 to 104)         | 33 (20.1 to 45.3)   | -7.8 (-26.1 to 21)    | 2180 (1240 to 3130)       | 819.5 (483.8 to 1151.8)  | -10.3 (-29.3 to 22.9)  |
|          | Female | 30 (18 to 48)          | 9 (5.4 to 14)       | -0.5 (-30.4 to 44.5)  | 31 (18 to 49)          | 9.7 (6 to 14.9)     | -0.4 (-29.4 to 43.5)  | 775 (445 to 1250)         | 216.9 (126.5 to 346.8)   | -3.4 (-33.9 to 44.7)   |
| Ethiopia | Both   | 2170 (1510 to 2920)    | 5.6 (3.9 to 7.5)    | 3.6 (-15.6 to 28.6)   | 2310 (1600 to 3130)    | 6.1 (4.2 to 8.3)    | 3.6 (-16.9 to 29.7)   | 55500 (38400 to 75100)    | 131.8 (91 to 178.9)      | 2.8 (-16.9 to 27.3)    |
|          | Male   | 1690 (1160 to 2280)    | 8.6 (5.9 to 11.6)   | 2.4 (-20.1 to 32.7)   | 1820 (1240 to 2490)    | 9.5 (6.5 to 12.9)   | 2.6 (-22 to 33.5)     | 42300 (29000 to 58000)    | 199.5 (136.2 to 272.2)   | 1.2 (-23.1 to 33.5)    |
|          | Female | 476 (290 to 764)       | 2.4 (1.5 to 3.8)    | 23.4 (0.1 to 55.3)    | 488 (300 to 796)       | 2.5 (1.6 to 4.1)    | 23.7 (2 to 54.4)      | 13200 (8030 to 21500)     | 59.7 (36.6 to 98.1)      | 21.9 (-0.5 to 53.6)    |
| Fiji     | Both   | 73 (57 to 92)          | 10.1 (8 to 12.5)    | 6.8 (-14.5 to 33)     | 74 (59 to 93)          | 10.7 (8.6 to 13.2)  | 6.8 (-14.3 to 32.2)   | 1950 (1510 to 2480)       | 246 (192.5 to 308.2)     | 6.2 (-16.2 to 33.3)    |
|          | Male   | 47 (36 to 60)          | 14.4 (11.5 to 17.8) | 5.7 (-15.8 to 31.9)   | 48 (37 to 61)          | 15.7 (12.6 to 19.2) | 5.6 (-15.6 to 30.6)   | 1260 (965 to 1610)        | 339.4 (264.9 to 429.3)   | 5.1 (-17.5 to 33.5)    |
|          | Female | 26 (20 to 34)          | 6.8 (5.2 to 8.6)    | 10.2 (-17 to 40.3)    | 27 (20 to 34)          | 7.2 (5.5 to 9)      | 10 (-16.7 to 39.7)    | 693 (530 to 902)          | 167.6 (128.2 to 215.8)   | 9.4 (-18.8 to 42.1)    |
| Finland  | Both   | 3110 (2470 to 3910)    | 25.2 (19.8 to 31.7) | -7.5 (-27.6 to 16.5)  | 2590 (2380 to 2780)    | 20.5 (18.9 to 21.9) | -8.1 (-14.2 to -1.8)  | 49400 (45600 to 52900)    | 430 (396.7 to 460.1)     | -10.8 (-16.9 to -4.4)  |
|          | Male   | 2010 (1560 to 2530)    | 35.8 (27.7 to 45.2) | -14.9 (-34.2 to 7.6)  | 1700 (1560 to 1840)    | 30.1 (27.7 to 32.5) | -15.7 (-22.4 to -9.1) | 32700 (30100 to 35200)    | 605.7 (558.4 to 655.1)   | -17.2 (-23.5 to -10.5) |
|          | Female | 1100 (872 to 1420)     | 16.6 (13 to 21.3)   | 3.5 (-19.4 to 33.1)   | 891 (791 to 984)       | 12.9 (11.5 to 14.1) | 3.3 (-5.7 to 13.5)    | 16800 (15100 to 18400)    | 279.9 (252.5 to 307.3)   | 0.1 (-8.8 to 10.1)     |
| France   | Both   | 45100 (35100 to 57500) | 36.8 (28.6 to 47)   | -8.8 (-29.6 to 16.7)  | 40200 (37100 to 42800) | 31.5 (29.4 to 33.4) | -9.7 (-14.9 to -4.7)  | 880000 (823000 to 934000) | 780.6 (731.1 to 828.8)   | -11.9 (-17.6 to -6.6)  |
|          | Male   | 32200 (25000 to 41000) | 57.1 (44.1 to 72.9) | -13.3 (-33.4 to 11.9) | 28900 (26800 to 31000) | 50.2 (46.8 to 53.7) | -14 (-19.9 to -7.9)   | 639000 (594000 to 683000) | 1195.2 (1110.8 to 1276)  | -15.7 (-22.3 to -9.5)  |
|          | Female | 12900 (10100 to 16400) | 19.7 (15.4 to 25.3) | 2.2 (-20.5 to 29.8)   | 11300 (9900 to 12500)  | 16.1 (14.6 to 17.6) | 0.8 (-6.8 to 9.2)     | 242000 (220000 to 264000) | 415.6 (378.1 to 453.4)   | -1.8 (-9.7 to 6.9)     |
| Gabon    | Both   | 202 (135 to 289)       | 19.3 (13.1 to 26.9) | 0.8 (-17 to 24.5)     | 205 (138 to 292)       | 20.2 (13.9 to 28.1) | 1.1 (-16.4 to 23.9)   | 5520 (3620 to 8040)       | 485.7 (322.9 to 695.2)   | -1.6 (-20.6 to 23.2)   |
|          | Male   | 148 (99 to 218)        | 30.2 (21 to 43.2)   | -3.7 (-20.7 to 19.1)  | 149 (101 to 218)       | 32 (22.4 to 45.4)   | -3.7 (-20.2 to 18.4)  | 4110 (2690 to 6100)       | 754.8 (511 to 1102.9)    | -5.2 (-22.9 to 19.6)   |

|            |        |                        |                      |                       |                        |                      |                        |                              |                           |                       |
|------------|--------|------------------------|----------------------|-----------------------|------------------------|----------------------|------------------------|------------------------------|---------------------------|-----------------------|
|            | Female | 54 (34 to 77)          | 9.9 (6.4 to 13.9)    | 10.1 (-15.1 to 41.1)  | 56 (36 to 79)          | 10.5 (6.8 to 14.7)   | 10.4 (-15.2 to 40.1)   | 1410 (874 to 2100)           | 241.3 (150.9 to 350.6)    | 7.7 (-18.7 to 41.4)   |
| The Gambia | Both   | 69 (52 to 89)          | 7.5 (5.7 to 9.6)     | 9 (-11.1 to 33.1)     | 72 (55 to 93)          | 8.1 (6.3 to 10.3)    | 8.7 (-10.6 to 32.1)    | 1790 (1340 to 2330)          | 182 (137 to 236.9)        | 8.9 (-12.9 to 34.7)   |
|            | Male   | 45 (35 to 58)          | 10.3 (8.1 to 13.2)   | 3 (-18.5 to 27.6)     | 48 (37 to 61)          | 11.2 (8.9 to 14.3)   | 2.6 (-17.7 to 25.7)    | 1170 (878 to 1500)           | 247.2 (189 to 315.3)      | 3 (-19.3 to 28.9)     |
|            | Female | 24 (15 to 34)          | 4.9 (3 to 7)         | 24.7 (-6.3 to 61.8)   | 25 (15 to 35)          | 5.3 (3.3 to 7.5)     | 24 (-7.1 to 60.1)      | 617 (384 to 869)             | 119.9 (74.5 to 170.8)     | 25.2 (-6.8 to 65.8)   |
| Georgia    | Both   | 1780 (1490 to 2110)    | 31.1 (25.9 to 36.9)  | 6.3 (-13.3 to 28.5)   | 1770 (1490 to 2080)    | 30.6 (25.6 to 36)    | 6 (-13.2 to 27.6)      | 45700 (37900 to 54200)       | 828.6 (684 to 980.4)      | 3.9 (-16 to 26.4)     |
|            | Male   | 1520 (1250 to 1800)    | 62.1 (51.5 to 73.5)  | 6.9 (-12.8 to 30)     | 1500 (1240 to 1760)    | 61.5 (51.3 to 72.5)  | 6.7 (-12.7 to 29)      | 39400 (32600 to 46900)       | 1623.5 (1343.6 to 1925.2) | 4.3 (-15.9 to 27.8)   |
|            | Female | 269 (224 to 322)       | 8 (6.7 to 9.7)       | 2.9 (-17.7 to 25.5)   | 274 (230 to 329)       | 8 (6.6 to 9.6)       | 2.8 (-17.2 to 25)      | 6390 (5260 to 7670)          | 207.2 (170.3 to 250.1)    | -0.6 (-20.3 to 23.1)  |
| Germany    | Both   | 63500 (49700 to 81900) | 35.5 (27.8 to 46.1)  | -8.9 (-29.1 to 17.5)  | 54000 (50500 to 57300) | 29 (27.3 to 30.6)    | -9.2 (-13.8 to -4.3)   | 1110000 (1050000 to 1180000) | 668.6 (631.4 to 705.6)    | -10.4 (-15.3 to -5.5) |
|            | Male   | 40700 (31200 to 52600) | 48.5 (37.4 to 62.9)  | -15.7 (-35 to 9.2)    | 35300 (32800 to 37600) | 41.3 (38.4 to 44)    | -15.7 (-20.8 to -10.1) | 726000 (680000 to 773000)    | 909 (852.1 to 967.2)      | -16 (-21.2 to -10.2)  |
|            | Female | 22800 (17700 to 29300) | 24.6 (18.9 to 31.9)  | 1.7 (-21.6 to 30.9)   | 18700 (16800 to 20300) | 18.9 (17.3 to 20.4)  | 0.7 (-7.2 to 8.6)      | 388000 (356000 to 418000)    | 455.9 (418.7 to 492.5)    | -0.7 (-8.5 to 7.5)    |
| Ghana      | Both   | 1380 (1110 to 1730)    | 8.7 (7.1 to 10.8)    | 6.8 (-11.5 to 29)     | 1410 (1140 to 1760)    | 9.3 (7.6 to 11.5)    | 6.2 (-11.3 to 27.7)    | 37900 (30000 to 47600)       | 215.6 (173.5 to 270.4)    | 6.1 (-12.8 to 30.8)   |
|            | Male   | 937 (751 to 1170)      | 13.9 (11.3 to 17.1)  | 5.3 (-15.6 to 31.7)   | 965 (779 to 1200)      | 15 (12.2 to 18.3)    | 4.7 (-15.4 to 30.2)    | 25200 (19900 to 31800)       | 336.2 (269.3 to 420)      | 4.7 (-16.8 to 33.2)   |
|            | Female | 440 (335 to 566)       | 4.8 (3.7 to 6.1)     | 18.8 (-4.6 to 47.2)   | 443 (338 to 570)       | 5.1 (3.9 to 6.5)     | 18.4 (-5.2 to 46.1)    | 12700 (9540 to 16300)        | 122 (92.8 to 158.5)       | 17.7 (-7.3 to 46.9)   |
| Greece     | Both   | 9240 (7270 to 11500)   | 42 (32.7 to 53.1)    | -2.8 (-24 to 23.1)    | 8640 (8030 to 9190)    | 37.6 (35.3 to 39.8)  | -2.6 (-8.3 to 3.3)     | 172000 (162000 to 182000)    | 856.9 (806.2 to 908.5)    | -4.6 (-10.2 to 1.5)   |
|            | Male   | 7180 (5650 to 9080)    | 70.3 (54.5 to 89.4)  | -5 (-26.4 to 20.6)    | 6770 (6280 to 7220)    | 64.1 (60 to 68.2)    | -4.5 (-10.9 to 2.2)    | 136000 (127000 to 144000)    | 1427.7 (1340.2 to 1517.5) | -7 (-13.1 to -0.5)    |
|            | Female | 2060 (1610 to 2570)    | 17.5 (13.5 to 21.9)  | 6.1 (-17.5 to 35.2)   | 1870 (1670 to 2050)    | 14.9 (13.5 to 16.2)  | 5.4 (-3.6 to 14.8)     | 36600 (33200 to 39800)       | 351 (320.9 to 380)        | 5.3 (-4 to 15)        |
| Greenland  | Both   | 54 (45 to 64)          | 77.7 (64.4 to 90.6)  | -12.8 (-25.7 to -0.1) | 53 (43 to 63)          | 78.2 (63.9 to 92)    | -13.2 (-26.9 to 0.5)   | 1310 (1050 to 1560)          | 1769 (1436.9 to 2101.5)   | -14.7 (-28.9 to 0.1)  |
|            | Male   | 33 (26 to 39)          | 89.1 (71.9 to 104.1) | -13.3 (-26.9 to 0.2)  | 33 (26 to 39)          | 91.4 (72.5 to 107.9) | -13.2 (-28.8 to 2.2)   | 806 (629 to 976)             | 2017 (1578 to 2416.9)     | -14.9 (-31 to 1.2)    |
|            | Female | 21 (17 to 26)          | 65.4 (53.9 to 79.8)  | -12.7 (-27.6 to 5.5)  | 20 (17 to 25)          | 64.4 (52.8 to 78.4)  | -13.8 (-28.6 to 4.3)   | 500 (402 to 614)             | 1485 (1205.3 to 1815.2)   | -14.7 (-29.8 to 4.3)  |

|               |        |                   |                     |                      |                   |                     |                      |                        |                          |                       |
|---------------|--------|-------------------|---------------------|----------------------|-------------------|---------------------|----------------------|------------------------|--------------------------|-----------------------|
| Grenada       | Both   | 16 (14 to 18)     | 14.2 (12.8 to 15.8) | -4.8 (-15.8 to 6.6)  | 16 (14 to 18)     | 14.4 (13 to 16)     | -6.5 (-17.1 to 4.4)  | 398 (351 to 450)       | 338.9 (300.8 to 379.3)   | -4.1 (-16 to 8.6)     |
|               | Male   | 11 (10 to 12)     | 20.8 (18.8 to 23.1) | -22 (-31.7 to -12.2) | 11 (10 to 12)     | 21.2 (19.1 to 23.5) | -25 (-34.1 to -15.9) | 276 (245 to 309)       | 480.4 (429.4 to 536.7)   | -17.5 (-27.8 to -6.3) |
|               | Female | 5 (4 to 6)        | 8.7 (7.5 to 10)     | 7.5 (-8 to 26.2)     | 5 (4 to 6)        | 8.9 (7.7 to 10.2)   | 6.8 (-8.3 to 24.4)   | 122 (105 to 141)       | 207.6 (179.2 to 240)     | 6.1 (-9.9 to 25.5)    |
| Guam          | Both   | 59 (49 to 70)     | 31.1 (26.1 to 37)   | 4.2 (-14.6 to 24.8)  | 60 (50 to 71)     | 31.9 (26.8 to 38)   | 3.8 (-14.8 to 23.9)  | 1460 (1210 to 1740)    | 760.7 (631.9 to 904.8)   | 4.8 (-14.2 to 25.8)   |
|               | Male   | 39 (33 to 47)     | 43.2 (35.8 to 51.7) | -1.1 (-18.6 to 19.5) | 40 (33 to 48)     | 45 (37.6 to 53.5)   | -1.5 (-18.9 to 19.3) | 984 (816 to 1180)      | 1038.5 (863.4 to 1244.5) | -0.3 (-18.5 to 21.1)  |
|               | Female | 20 (16 to 24)     | 20.2 (16.5 to 24.9) | 14.8 (-10.6 to 42.4) | 20 (16 to 25)     | 20.6 (16.8 to 25.4) | 15.1 (-10.4 to 44)   | 477 (384 to 591)       | 493.3 (397.6 to 610.4)   | 14.8 (-10 to 42.5)    |
| Guatemala     | Both   | 867 (677 to 1100) | 7.9 (6.2 to 9.9)    | -9.3 (-31.4 to 18.5) | 897 (702 to 1130) | 8.3 (6.6 to 10.4)   | -9.9 (-31.1 to 15.9) | 21700 (16700 to 27500) | 184.7 (142.5 to 233.6)   | -10.3 (-33 to 18.1)   |
|               | Male   | 508 (393 to 643)  | 10.4 (8 to 13)      | -9.9 (-33.1 to 19.7) | 536 (415 to 674)  | 11.3 (8.8 to 14.1)  | -9.9 (-32.6 to 18.5) | 12500 (9550 to 15900)  | 236.8 (181 to 302.2)     | -11.6 (-35.9 to 18.5) |
|               | Female | 359 (281 to 451)  | 5.9 (4.6 to 7.3)    | -7.2 (-28.7 to 19.9) | 361 (284 to 450)  | 6 (4.8 to 7.5)      | -8.6 (-29.7 to 19.3) | 9230 (7170 to 11700)   | 141.6 (109.8 to 179)     | -7.2 (-29.7 to 24)    |
| Guinea        | Both   | 549 (421 to 707)  | 10.1 (7.8 to 12.9)  | 2.2 (-15.9 to 25.2)  | 570 (440 to 732)  | 10.7 (8.4 to 13.7)  | 1.7 (-16.2 to 24.2)  | 14900 (11200 to 19400) | 256.2 (193.6 to 331)     | 0.9 (-18.6 to 24.1)   |
|               | Male   | 432 (327 to 562)  | 15.7 (12 to 20.2)   | -1.8 (-20.2 to 21.7) | 448 (343 to 581)  | 16.7 (13 to 21.4)   | -2.5 (-20.2 to 21.1) | 11700 (8750 to 15400)  | 398.6 (301.6 to 520.1)   | -2.6 (-22.5 to 22.2)  |
|               | Female | 118 (84 to 154)   | 4.4 (3.1 to 5.7)    | 11.6 (-11 to 38.9)   | 122 (86 to 159)   | 4.7 (3.3 to 6.1)    | 11.4 (-9.8 to 38)    | 3210 (2230 to 4280)    | 110 (77.5 to 145.8)      | 11.6 (-10.4 to 40.5)  |
| Guinea-Bissau | Both   | 92 (59 to 133)    | 13.1 (8.6 to 18.7)  | -0.9 (-17.2 to 21.4) | 93 (59 to 134)    | 13.8 (9.1 to 19.6)  | -0.7 (-16.5 to 21.1) | 2560 (1640 to 3720)    | 325.4 (208.5 to 472.8)   | -2.2 (-19.3 to 21.1)  |
|               | Male   | 68 (41 to 105)    | 21.9 (13.6 to 33)   | -4.4 (-19.7 to 16.8) | 69 (41 to 106)    | 23.4 (14.7 to 34.9) | -4 (-18.7 to 16.9)   | 1870 (1100 to 2930)    | 533.9 (319.8 to 821.4)   | -5.4 (-21.2 to 17.8)  |
|               | Female | 24 (18 to 33)     | 6.2 (4.6 to 8.2)    | 11 (-11.6 to 38.9)   | 24 (18 to 32)     | 6.4 (4.8 to 8.4)    | 10.7 (-11.2 to 37.3) | 686 (491 to 917)       | 152.7 (111.4 to 205.6)   | 8.9 (-13.7 to 37.8)   |
| Guyana        | Both   | 55 (43 to 71)     | 8.7 (6.8 to 11)     | 4.8 (-19.1 to 33.2)  | 55 (43 to 70)     | 9 (7.1 to 11.3)     | 4.3 (-19 to 31.6)    | 1510 (1160 to 1930)    | 221.5 (171.5 to 281.3)   | 4 (-21 to 35)         |
|               | Male   | 35 (26 to 44)     | 11.8 (9.1 to 14.9)  | 1.9 (-23.3 to 33.2)  | 35 (26 to 44)     | 12.3 (9.5 to 15.4)  | 1.6 (-22.9 to 32.3)  | 938 (705 to 1220)      | 293.5 (223.8 to 376.8)   | 0.6 (-25.3 to 34.7)   |
|               | Female | 21 (16 to 26)     | 6.1 (4.8 to 7.7)    | 12.2 (-14.3 to 45.5) | 21 (16 to 26)     | 6.2 (4.9 to 7.9)    | 11.4 (-14.3 to 43.4) | 567 (431 to 729)       | 158.1 (121.6 to 201.8)   | 11.6 (-15.9 to 46.7)  |
| Haiti         | Both   | 780 (481 to 1270) | 11.3 (7.2 to 18.4)  | 0.3 (-16.9 to 22.6)  | 796 (495 to 1290) | 12 (7.6 to 19.4)    | 0 (-17.2 to 22)      | 21500 (13200 to 34800) | 284.3 (175.6 to 462.2)   | -0.3 (-18.3 to 23.4)  |
|               | Male   | 546 (309 to 1010) | 17 (9.9 to 31.3)    | -0.3 (-19 to 25.3)   | 560 (320 to 1030) | 18.1 (10.6 to 33.2) | -0.6 (-18.9 to 24.5) | 14800 (8190 to 27300)  | 422 (239.6 to 778.7)     | -0.6 (-20.4 to 26)    |
|               | Female | 234 (151 to 332)  | 6.2 (4.1 to 8.7)    | 4.7 (-18.1 to 32.6)  | 236 (153 to 333)  | 6.5 (4.3 to 9.1)    | 4.5 (-16.8 to 31.9)  | 6700 (4360 to 9720)    | 161.6 (104.1 to 230.9)   | 3.3 (-18.7 to 32.5)   |

|           |        |                         |                     |                      |                         |                     |                       |                              |                           |                       |
|-----------|--------|-------------------------|---------------------|----------------------|-------------------------|---------------------|-----------------------|------------------------------|---------------------------|-----------------------|
| Honduras  | Both   | 1380 (894 to 1970)      | 23 (15 to 32.7)     | 14.5 (-7.9 to 40.8)  | 1400 (908 to 1980)      | 24.1 (15.8 to 33.8) | 13.5 (-6.8 to 38.9)   | 35000 (22900 to 50300)       | 553.2 (362.3 to 791.7)    | 11.9 (-11 to 42.3)    |
|           | Male   | 556 (344 to 793)        | 19.9 (12.2 to 28.4) | 13.9 (-14.6 to 51.7) | 579 (358 to 826)        | 21.2 (13 to 29.9)   | 13.8 (-13 to 52)      | 14100 (8870 to 19900)        | 480.2 (297.3 to 679.5)    | 10.8 (-16.3 to 50.3)  |
|           | Female | 820 (492 to 1220)       | 25.8 (15.7 to 38)   | 13.7 (-12.1 to 47.8) | 820 (494 to 1210)       | 26.7 (16.5 to 38.9) | 11.8 (-12.7 to 43.9)  | 20800 (12500 to 31000)       | 618.3 (369.1 to 915.2)    | 11.9 (-15 to 48.5)    |
| Hungary   | Both   | 9510 (7850 to 11600)    | 51.9 (42.6 to 63.6) | -11.8 (-27.7 to 8.1) | 8970 (7430 to 10800)    | 48.1 (39.6 to 58.4) | -12.8 (-28.4 to 5.8)  | 212000 (173000 to 259000)    | 1221 (992.7 to 1496)      | -16.1 (-31.7 to 3)    |
|           | Male   | 5820 (4740 to 7100)     | 74.4 (60.6 to 90.6) | -18.1 (-33.6 to 0.9) | 5510 (4500 to 6670)     | 70.3 (57.4 to 85)   | -19 (-34 to -0.8)     | 133000 (107000 to 162000)    | 1716.8 (1390.4 to 2103.5) | -21.5 (-36.9 to -3.2) |
|           | Female | 3690 (3020 to 4510)     | 35.6 (29.1 to 43.8) | -2.2 (-21.3 to 20.3) | 3460 (2860 to 4210)     | 32.4 (26.6 to 39.6) | -3.5 (-21.5 to 18.2)  | 79900 (65200 to 97800)       | 838.9 (680.2 to 1034.5)   | -7.4 (-25.5 to 14.8)  |
| Iceland   | Both   | 187 (163 to 215)        | 34.5 (30.2 to 39.5) | -11.3 (-23.1 to 2.4) | 147 (129 to 163)        | 26.5 (23.5 to 29.4) | -15.3 (-23.5 to -6.3) | 3050 (2730 to 3380)          | 589.1 (529.2 to 653.2)    | -13.6 (-22.2 to -4)   |
|           | Male   | 100 (87 to 114)         | 38.1 (33.3 to 43.5) | -12.1 (-24.5 to 1)   | 77 (69 to 86)           | 29.4 (26.2 to 32.6) | -15.8 (-24.9 to -5.1) | 1630 (1460 to 1810)          | 637.4 (568.1 to 705)      | -12.3 (-22.3 to -1.4) |
|           | Female | 87 (74 to 102)          | 31.4 (26.7 to 36.7) | -11.4 (-24.9 to 5.2) | 69 (60 to 79)           | 23.9 (20.8 to 26.9) | -15.9 (-25.4 to -4.9) | 1420 (1260 to 1600)          | 544.6 (485.1 to 611)      | -15.8 (-25.3 to -5.1) |
| India     | Both   | 87300 (71900 to 104000) | 7.7 (6.4 to 9.1)    | 10.9 (-8.8 to 30.9)  | 89200 (73700 to 105000) | 8.1 (6.7 to 9.5)    | 10.4 (-8.9 to 29.6)   | 2280000 (1870000 to 2690000) | 190.2 (156.6 to 224.7)    | 8.8 (-10.5 to 28.4)   |
|           | Male   | 61300 (48100 to 75900)  | 11.2 (8.8 to 13.7)  | 3.4 (-18.9 to 27.2)  | 62500 (49100 to 76400)  | 11.7 (9.2 to 14.3)  | 3.1 (-18.5 to 26.9)   | 1590000 (1230000 to 1950000) | 271.3 (211.9 to 331.8)    | 1.1 (-20.9 to 25.6)   |
|           | Female | 26100 (20300 to 32500)  | 4.5 (3.5 to 5.6)    | 36.1 (5.6 to 71.2)   | 26700 (21000 to 33500)  | 4.7 (3.7 to 5.9)    | 35.3 (3.7 to 69.7)    | 689000 (534000 to 874000)    | 112.9 (87.7 to 142.7)     | 34.4 (2.3 to 70.8)    |
| Indonesia | Both   | 48200 (35300 to 59300)  | 22.9 (16.8 to 28)   | 7 (-12.5 to 27.6)    | 49400 (36100 to 61100)  | 24.4 (17.9 to 30.2) | 6.9 (-11.8 to 24.6)   | 1280000 (928000 to 1600000)  | 555.8 (404.2 to 685.3)    | 4.5 (-15.1 to 25.5)   |
|           | Male   | 32900 (24500 to 43300)  | 33.2 (25.1 to 42.8) | 5.5 (-18.3 to 33.4)  | 33800 (24800 to 44200)  | 35.8 (27.1 to 45.7) | 5.3 (-17.8 to 33.5)   | 872000 (632000 to 1170000)   | 796 (584.5 to 1045.6)     | 3.1 (-21.1 to 33.1)   |
|           | Female | 15300 (8550 to 22900)   | 13.9 (7.7 to 20.6)  | 10.4 (-14.1 to 38.8) | 15600 (8700 to 23600)   | 14.7 (8.2 to 21.6)  | 10.7 (-13.1 to 36.8)  | 408000 (227000 to 623000)    | 339.2 (190 to 516.4)      | 7.4 (-17.2 to 38.6)   |
| Iran      | Both   | 8710 (8040 to 9370)     | 12.2 (11.3 to 13.2) | 14.2 (6.6 to 22.1)   | 8920 (8250 to 9600)     | 12.9 (11.9 to 13.9) | 12.7 (5.8 to 20.7)    | 219000 (203000 to 235000)    | 286.8 (266.1 to 307.6)    | 12.2 (4.8 to 20.2)    |

|         |        |                          |                     |                      |                        |                     |                        |                              |                        |                        |
|---------|--------|--------------------------|---------------------|----------------------|------------------------|---------------------|------------------------|------------------------------|------------------------|------------------------|
|         | Male   | 5880 (5360 to 6410)      | 16.6 (15.1 to 18.1) | 8 (0.2 to 16.8)      | 6160 (5640 to 6730)    | 17.8 (16.2 to 19.4) | 7.5 (-0.3 to 16.4)     | 150000 (137000 to 164000)    | 396.9 (364.1 to 434.8) | 7.4 (-0.7 to 17.1)     |
|         | Female | 2830 (2550 to 3080)      | 7.9 (7.1 to 8.7)    | 32.7 (18.7 to 45.3)  | 2770 (2490 to 3020)    | 8 (7.2 to 8.8)      | 29.7 (15.9 to 42)      | 68700 (62600 to 74000)       | 178.2 (161.4 to 192.4) | 26.1 (13.2 to 37.4)    |
| Iraq    | Both   | 4150 (3200 to 5130)      | 18.7 (14.5 to 22.7) | 20.6 (0.1 to 45.9)   | 4230 (3280 to 5190)    | 19.9 (15.6 to 23.8) | 21.1 (1 to 45.9)       | 111000 (84200 to 140000)     | 451.6 (346 to 557.5)   | 16.3 (-4.5 to 41.5)    |
|         | Male   | 3000 (2290 to 3680)      | 28.4 (22 to 34)     | 16.3 (-4.7 to 44.7)  | 3110 (2380 to 3780)    | 30.9 (24.2 to 36.8) | 17.7 (-3.2 to 46.4)    | 79500 (60500 to 101000)      | 675.6 (516.7 to 825.1) | 12.4 (-9.2 to 41.5)    |
|         | Female | 1160 (880 to 1480)       | 9.8 (7.5 to 12.3)   | 37 (7.6 to 76.2)     | 1130 (861 to 1430)     | 9.9 (7.7 to 12.2)   | 35.8 (7.8 to 74.3)     | 31200 (23300 to 41000)       | 239.6 (181 to 307.8)   | 30.9 (2 to 70.3)       |
| Ireland | Both   | 2500 (1980 to 3140)      | 33.2 (26.2 to 41.7) | -8 (-27.9 to 16.4)   | 2190 (2010 to 2370)    | 28.8 (26.4 to 31)   | -12.3 (-18.6 to -6)    | 43600 (40200 to 46900)       | 593.6 (548 to 637.7)   | -13.4 (-19.9 to -6.9)  |
|         | Male   | 1360 (1040 to 1730)      | 38.2 (29.3 to 48.7) | -15.3 (-35.3 to 7.8) | 1220 (1100 to 1330)    | 34.3 (30.9 to 37.4) | -18.9 (-26.1 to -11.6) | 24300 (22000 to 26300)       | 686.3 (623.6 to 743.1) | -19.8 (-27.2 to -12.6) |
|         | Female | 1140 (904 to 1460)       | 29 (23 to 37)       | 0.9 (-21.4 to 28.2)  | 974 (866 to 1080)      | 24.2 (21.6 to 26.9) | -4.4 (-13 to 4.9)      | 19300 (17300 to 21500)       | 510.1 (456.9 to 571)   | -4.7 (-13.4 to 5.1)    |
| Israel  | Both   | 2670 (2090 to 3390)      | 23.4 (18.1 to 29.7) | -6.7 (-26.8 to 18.1) | 2520 (2310 to 2680)    | 21.7 (20 to 23.1)   | -8.6 (-14 to -2.9)     | 52600 (49100 to 55900)       | 478.1 (446.7 to 507.5) | -9.9 (-15.5 to -4.1)   |
|         | Male   | 1750 (1350 to 2240)      | 33.4 (25.8 to 42.7) | -9.9 (-30.8 to 15.2) | 1650 (1530 to 1770)    | 31.4 (29 to 33.6)   | -11.6 (-17.2 to -5.5)  | 35800 (33300 to 38300)       | 694.5 (646.7 to 745.2) | -12.4 (-18 to -5.8)    |
|         | Female | 918 (724 to 1170)        | 14.6 (11.5 to 18.6) | -2 (-22.4 to 24.1)   | 867 (769 to 953)       | 13.4 (12 to 14.7)   | -4.4 (-12.5 to 3.9)    | 16900 (15200 to 18400)       | 285.3 (258.6 to 310.4) | -6.2 (-14.1 to 2.6)    |
| Italy   | Both   | 41700 (34300 to 49600)   | 30.2 (24.6 to 36)   | -10.8 (-26.4 to 6.6) | 37000 (33900 to 38900) | 25.6 (23.8 to 26.7) | -11.3 (-13.8 to -9)    | 699000 (656000 to 729000)    | 552 (523.3 to 573.3)   | -12.8 (-15.2 to -10.5) |
|         | Male   | 29200 (22600 to 37000)   | 46.3 (35.9 to 58.9) | -16.8 (-35 to 5.3)   | 26600 (24600 to 28000) | 41.1 (38.5 to 43.2) | -17.2 (-20.1 to -14.5) | 500000 (472000 to 524000)    | 842 (797.1 to 881.3)   | -18.1 (-20.8 to -15.5) |
|         | Female | 12500 (9730 to 15800)    | 17.1 (13.3 to 21.6) | 1.3 (-20.3 to 28.2)  | 10400 (9230 to 11200)  | 13.2 (12.1 to 14)   | 0.8 (-2.8 to 4.9)      | 199000 (183000 to 210000)    | 305 (286 to 319.9)     | -0.8 (-4.2 to 3.3)     |
| Jamaica | Both   | 575 (454 to 718)         | 19.5 (15.3 to 24.3) | -3.8 (-24.9 to 21.1) | 572 (451 to 709)       | 19.3 (15.2 to 24)   | -3.6 (-24.3 to 21.2)   | 14000 (10800 to 17600)       | 471.9 (365.3 to 593)   | -2.8 (-24.7 to 23.6)   |
|         | Male   | 447 (348 to 560)         | 31.2 (24.3 to 39)   | -8 (-27.9 to 16.1)   | 441 (345 to 549)       | 31 (24.3 to 38.6)   | -8 (-28 to 15.7)       | 10900 (8400 to 13800)        | 750.6 (576.8 to 948.4) | -6.7 (-27.9 to 19.2)   |
|         | Female | 128 (98 to 165)          | 8.3 (6.4 to 10.7)   | 12.6 (-14.7 to 46.1) | 131 (101 to 168)       | 8.3 (6.4 to 10.7)   | 13.1 (-14 to 46.7)     | 3070 (2320 to 3990)          | 201.8 (152.5 to 263)   | 13 (-15.6 to 49)       |
| Japan   | Both   | 117000 (95800 to 137000) | 30.7 (25.5 to 36)   | -11.1 (-23.7 to 3.9) | 86000 (73400 to 92700) | 21.2 (18.9 to 22.5) | -11.4 (-14 to -9.1)    | 1350000 (1210000 to 1430000) | 408 (378.7 to 427.4)   | -14.2 (-17 to -11.8)   |

|            |        |                           |                     |                       |                           |                     |                        |                               |                          |                       |
|------------|--------|---------------------------|---------------------|-----------------------|---------------------------|---------------------|------------------------|-------------------------------|--------------------------|-----------------------|
|            | Male   | 81700<br>(66700 to 99600) | 49 (40 to 59.9)     | -15.3 (-30.2 to 2.9)  | 59100<br>(53000 to 62900) | 34.4 (31.3 to 36.4) | -16.2 (-19.3 to -13.7) | 966000<br>(891000 to 1020000) | 638.5 (595.3 to 669.4)   | -18 (-21.4 to -15.3)  |
|            | Female | 35100<br>(26600 to 42600) | 15.9 (12.5 to 19.5) | -3.8 (-20.4 to 15.5)  | 26900<br>(20600 to 30300) | 10.9 (9 to 12)      | -3.8 (-7.5 to -0.1)    | 381000<br>(316000 to 419000)  | 210.6 (186.7 to 225.9)   | -6.8 (-10.6 to -3)    |
| Jordan     | Both   | 914 (748 to 1110)         | 14.3 (11.9 to 17.4) | -5.1 (-22.9 to 14.4)  | 917 (749 to 1110)         | 15.1 (12.5 to 18.2) | -6.3 (-24.1 to 13.5)   | 24200 (19800 to 29400)        | 338 (276.6 to 409.8)     | -6.2 (-24.7 to 14.3)  |
|            | Male   | 697 (537 to 882)          | 20.9 (16.3 to 26.2) | -9.7 (-30.3 to 14.1)  | 711 (551 to 897)          | 22.3 (17.5 to 27.9) | -10.2 (-30.4 to 13.3)  | 18700 (14300 to 23700)        | 497.8 (385.8 to 628.3)   | -10.6 (-31.9 to 14.2) |
|            | Female | 218 (171 to 277)          | 7.2 (5.7 to 9)      | 12 (-11.5 to 40)      | 206 (163 to 261)          | 7.2 (5.7 to 9.1)    | 10.4 (-12 to 40)       | 5580 (4370 to 7140)           | 161.9 (128.3 to 205.7)   | 8 (-15.2 to 37.1)     |
| Kazakhstan | Both   | 3830 (3260 to 4410)       | 21.4 (18.4 to 24.4) | -17.5 (-29.8 to -4.4) | 3720 (3180 to 4260)       | 21.1 (18.2 to 24.1) | -18.9 (-30.9 to -6.1)  | 99100 (84100 to 115000)       | 530 (452 to 608.7)       | -20.6 (-32.6 to -7.5) |
|            | Male   | 3050 (2580 to 3560)       | 41.8 (35.5 to 48.5) | -21 (-33.4 to -7.8)   | 2950 (2500 to 3440)       | 41.8 (35.6 to 48.3) | -22.1 (-34.2 to -9.2)  | 79500 (66600 to 93300)        | 1011.2 (856.3 to 1179.9) | -24 (-36.4 to -11.1)  |
|            | Female | 782 (656 to 915)          | 7.7 (6.5 to 9)      | -4.3 (-20.6 to 13)    | 768 (646 to 894)          | 7.6 (6.4 to 8.9)    | -6.6 (-22.4 to 9.9)    | 19600 (16300 to 23100)        | 187.7 (156.5 to 220.9)   | -7.3 (-23.9 to 10.4)  |
| Kenya      | Both   | 1180 (977 to 1430)        | 5.6 (4.7 to 6.7)    | 0.7 (-16 to 16.9)     | 1280 (1070 to 1550)       | 6.3 (5.3 to 7.5)    | 0.6 (-13.5 to 16.4)    | 33700 (27700 to 41400)        | 143.5 (119 to 174.3)     | -1.3 (-16 to 15.2)    |
|            | Male   | 895 (723 to 1090)         | 9.4 (7.7 to 11.4)   | -4.9 (-23.3 to 16.3)  | 958 (771 to 1160)         | 10.5 (8.7 to 12.5)  | -4.6 (-21.4 to 15.2)   | 24700 (19600 to 30400)        | 228.4 (184.9 to 276.2)   | -6.4 (-24.1 to 15.6)  |
|            | Female | 286 (195 to 434)          | 2.5 (1.7 to 3.7)    | 17.7 (-8 to 58.4)     | 324 (222 to 483)          | 2.9 (2 to 4.2)      | 14.7 (-9.2 to 47.9)    | 8940 (6020 to 13400)          | 69.5 (47.3 to 104.4)     | 13.2 (-11.2 to 48)    |
| Kiribati   | Both   | 14 (10 to 18)             | 19.2 (14.4 to 24.6) | 0.6 (-15.1 to 17.5)   | 14 (10 to 18)             | 20.1 (15.3 to 25.6) | 1 (-14.1 to 17.6)      | 413 (300 to 550)              | 514 (381.2 to 673)       | 0.1 (-16.6 to 18.6)   |
|            | Male   | 11 (8 to 15)              | 36.7 (27.2 to 47.5) | 0.4 (-16.4 to 19.6)   | 11 (8 to 15)              | 38.7 (28.9 to 49.9) | 0.7 (-15.7 to 19.4)    | 341 (244 to 461)              | 962.1 (697.3 to 1266.5)  | 0.1 (-18.1 to 21.7)   |
|            | Female | 3 (2 to 3)                | 6.7 (4.9 to 8.9)    | 5.7 (-13.9 to 29.1)   | 3 (2 to 3)                | 7.2 (5.3 to 9.5)    | 6 (-13.1 to 27.9)      | 71 (51 to 96)                 | 171.2 (124 to 226.9)     | 4 (-15.8 to 28.1)     |
| Kuwait     | Both   | 225 (185 to 272)          | 10.1 (8.2 to 12.2)  | 0.8 (-17.4 to 21.8)   | 228 (185 to 275)          | 10.8 (8.7 to 13)    | 0.4 (-17.8 to 21.3)    | 5540 (4540 to 6680)           | 214.8 (174.7 to 260.7)   | -3 (-20.7 to 17.8)    |
|            | Male   | 173 (133 to 216)          | 13.3 (10.3 to 16.6) | 6.5 (-16.6 to 33.8)   | 181 (140 to 225)          | 14.5 (11.3 to 18.1) | 6.5 (-16.3 to 34.1)    | 4260 (3280 to 5350)           | 287.6 (222.7 to 360.3)   | 3.2 (-19.3 to 30.3)   |
|            | Female | 53 (41 to 66)             | 5.2 (4.1 to 6.5)    | -12.5 (-29.7 to 8.9)  | 47 (37 to 59)             | 5 (3.9 to 6.1)      | -15.5 (-31.8 to 4.3)   | 1280 (989 to 1620)            | 104.2 (82.3 to 130.2)    | -17.3 (-33.8 to 3.3)  |
| Kyrgyzstan | Both   | 569 (493 to 647)          | 12.2 (10.6 to 13.9) | -6.8 (-18.5 to 5.7)   | 560 (486 to 636)          | 12.4 (10.8 to 14)   | -7 (-18.6 to 5.3)      | 15400 (13300 to 17500)        | 308.1 (266.8 to 350.8)   | -9.8 (-21.9 to 2.8)   |
|            | Male   | 430 (371 to 492)          | 21.3 (18.5 to 24.3) | -9.1 (-21.3 to 4.2)   | 422 (364 to 483)          | 21.6 (18.8 to 24.7) | -9.1 (-20.9 to 3.8)    | 11700 (10000 to 13400)        | 532.3 (460.1 to 608.8)   | -12.2 (-24.5 to 0.5)  |
|            | Female | 139 (115 to 164)          | 5.4 (4.5 to 6.3)    | 3 (-14.1 to 21.2)     | 139 (115 to 163)          | 5.5 (4.6 to 6.4)    | 1.8 (-15 to 19.7)      | 3660 (3010 to 4340)           | 133.4 (110.8 to 157.9)   | 0.6 (-16.8 to 18.9)   |



|           |        |                     |                     |                      |                     |                     |                       |                        |                         |                       |
|-----------|--------|---------------------|---------------------|----------------------|---------------------|---------------------|-----------------------|------------------------|-------------------------|-----------------------|
| Laos      | Both   | 973 (718 to 1260)   | 22.8 (17 to 29)     | 3.2 (-15.6 to 25.5)  | 1000 (742 to 1290)  | 24.3 (18.3 to 30.7) | 3.3 (-15.1 to 25.2)   | 26500 (19100 to 35100) | 566.5 (418.1 to 736.9)  | 1.2 (-18.4 to 24.3)   |
|           | Male   | 713 (519 to 923)    | 35.3 (26.3 to 44.8) | -0.6 (-19.7 to 22.4) | 736 (538 to 944)    | 38 (28.3 to 48.3)   | -0.6 (-18.6 to 21.5)  | 19200 (13700 to 25300) | 861.3 (624.1 to 1112.8) | -2.5 (-22 to 21.2)    |
|           | Female | 260 (186 to 372)    | 11.4 (8.4 to 16.5)  | 13.9 (-8.8 to 40.6)  | 264 (191 to 380)    | 12.1 (8.9 to 17.4)  | 14.3 (-8.3 to 41.1)   | 7300 (5150 to 10500)   | 292.9 (208.9 to 416.9)  | 11.4 (-11.4 to 37.2)  |
| Latvia    | Both   | 1020 (838 to 1240)  | 26.9 (22 to 33)     | -13.6 (-29.6 to 6.5) | 950 (788 to 1150)   | 24.6 (20.3 to 29.9) | -15.3 (-30.9 to 3.3)  | 21200 (17400 to 25900) | 602 (489.8 to 741.4)    | -16.7 (-32.9 to 3.1)  |
|           | Male   | 777 (608 to 987)    | 53.6 (41.9 to 68)   | -20 (-37.9 to 2.3)   | 718 (564 to 913)    | 49.4 (38.8 to 62.7) | -21.7 (-38.8 to -0.2) | 16500 (12800 to 21200) | 1156.9 (899.1 to 1483)  | -22.6 (-40.8 to -0.1) |
|           | Female | 241 (181 to 317)    | 10 (7.4 to 13.3)    | 2.9 (-23.7 to 37.1)  | 232 (176 to 304)    | 9.3 (6.9 to 12.4)   | 0.3 (-25.3 to 33.2)   | 4690 (3480 to 6280)    | 220.9 (160.2 to 297.7)  | -0.3 (-27.2 to 34.5)  |
| Lebanon   | Both   | 1420 (1170 to 1870) | 27.3 (22.4 to 35.8) | -1.8 (-17.3 to 13.6) | 1430 (1180 to 1900) | 27.5 (22.7 to 36.4) | -5.1 (-19 to 10.1)    | 32700 (26400 to 42600) | 629.6 (507.3 to 817.1)  | -3.7 (-18.7 to 13.1)  |
|           | Male   | 914 (729 to 1200)   | 38.9 (30.9 to 51.4) | -5.2 (-20.4 to 12.5) | 961 (768 to 1280)   | 40.9 (32.7 to 54.7) | -6.6 (-20.8 to 11)    | 21800 (17000 to 28500) | 926 (725.1 to 1215.4)   | -6.1 (-20.7 to 11.3)  |
|           | Female | 507 (375 to 703)    | 17.8 (13.1 to 24.5) | 14 (-13.6 to 39.1)   | 472 (347 to 656)    | 16.5 (12.1 to 22.8) | 8.5 (-16.7 to 30.5)   | 10900 (8040 to 14800)  | 385 (281.4 to 520.5)    | 9.7 (-16.4 to 34.5)   |
| Lesotho   | Both   | 233 (158 to 326)    | 18.1 (12.4 to 25)   | 4 (-16.9 to 27.6)    | 240 (163 to 333)    | 19.1 (13.1 to 26.4) | 3.4 (-17 to 26.6)     | 6740 (4490 to 9600)    | 487.4 (326.5 to 686.5)  | 2.1 (-19.5 to 26.3)   |
|           | Male   | 174 (119 to 251)    | 33.1 (23 to 46.6)   | 1.4 (-16.4 to 22)    | 179 (122 to 256)    | 35.2 (24.5 to 49.1) | 0.5 (-16.8 to 20.8)   | 5200 (3470 to 7510)    | 887.6 (607.4 to 1274)   | -0.4 (-18.3 to 20.9)  |
|           | Female | 59 (35 to 93)       | 8.1 (4.8 to 12.5)   | 13.6 (-20.5 to 51.5) | 61 (36 to 96)       | 8.7 (5.3 to 13.2)   | 13.5 (-20 to 50.7)    | 1540 (883 to 2450)     | 199.4 (116.3 to 317.6)  | 12.5 (-23.4 to 54.6)  |
| Liberia   | Both   | 175 (118 to 241)    | 9.2 (6.4 to 12.6)   | -0.5 (-20.3 to 22.6) | 182 (125 to 250)    | 10 (7 to 13.6)      | -0.6 (-19.9 to 22.8)  | 4690 (3140 to 6500)    | 218.8 (148 to 302.7)    | -0.4 (-21.1 to 25.2)  |
|           | Male   | 125 (81 to 181)     | 13.2 (8.6 to 18.7)  | -4.1 (-23.1 to 19.5) | 131 (86 to 188)     | 14.4 (9.6 to 20.2)  | -4 (-22.7 to 19.9)    | 3310 (2110 to 4830)    | 308.4 (201.1 to 445.7)  | -4.4 (-24 to 20.7)    |
|           | Female | 49 (32 to 66)       | 5.1 (3.3 to 6.7)    | 11 (-12.9 to 37.7)   | 51 (33 to 67)       | 5.5 (3.6 to 7.2)    | 10.9 (-12.7 to 37.2)  | 1380 (885 to 1840)     | 124.8 (81.2 to 165.3)   | 10.9 (-13.7 to 39.8)  |
| Libya     | Both   | 925 (688 to 1180)   | 18.5 (13.7 to 23.5) | -5.5 (-27.8 to 19.9) | 946 (703 to 1200)   | 19.4 (14.4 to 24.5) | -5.6 (-27.8 to 19.8)  | 25000 (18500 to 32000) | 457.8 (341.3 to 584)    | -5.3 (-28.2 to 20.6)  |
|           | Male   | 797 (584 to 1020)   | 31.4 (23 to 40.2)   | -5.1 (-27.9 to 22.4) | 821 (601 to 1050)   | 33.2 (24.3 to 42.5) | -5.3 (-27.8 to 21.6)  | 21600 (15900 to 27800) | 778.8 (569.1 to 1000.8) | -4.9 (-28.1 to 22.9)  |
|           | Female | 128 (82 to 175)     | 5.1 (3.2 to 6.9)    | -2.4 (-28.6 to 26.7) | 125 (80 to 169)     | 5.1 (3.2 to 6.9)    | -2.3 (-28.8 to 26.2)  | 3390 (2130 to 4710)    | 123.7 (78.8 to 170.1)   | -2 (-29.4 to 26.7)    |
| Lithuania | Both   | 1400 (1140 to 1690) | 25.4 (20.6 to 31)   | -14.7 (-30.5 to 4.4) | 1310 (1070 to 1590) | 23.6 (19.1 to 28.5) | -15.6 (-30.7 to 2.7)  | 29600 (23900 to 36000) | 575.8 (462.7 to 706.5)  | -17 (-33.3 to 2.2)    |
|           | Male   | 1080 (866 to 1320)  | 51 (40.9 to 62.1)   | -20.1 (-35 to -2.9)  | 1020 (818 to 1230)  | 47.9 (38.6 to 58.1) | -20.8 (-35.6 to -3.8) | 23600 (18700 to 29000) | 1123.6 (893.4 to 1381)  | -21.9 (-37.5 to -4.1) |
|           | Female | 312 (253 to 384)    | 9 (7.2 to 11.2)     | 6 (-14.6 to 31.5)    | 295 (237 to 359)    | 8.2 (6.6 to 10.1)   | 4.1 (-16 to 28.8)     | 5990 (4800 to 7380)    | 197.1 (155.9 to 243.6)  | 3 (-18.6 to 28.8)     |

|            |        |                     |                     |                      |                     |                     |                        |                          |                        |                        |
|------------|--------|---------------------|---------------------|----------------------|---------------------|---------------------|------------------------|--------------------------|------------------------|------------------------|
| Luxembourg | Both   | 318 (261 to 386)    | 32.5 (26.7 to 39.6) | -17.1 (-32.3 to 2)   | 289 (254 to 328)    | 29.1 (25.5 to 32.9) | -15.8 (-25.8 to -4)    | 6210 (5480 to 7040)      | 655.2 (577.5 to 742.7) | -17.3 (-27.3 to -5.6)  |
|            | Male   | 217 (177 to 264)    | 47 (38.4 to 57.2)   | -22.1 (-37 to -3.6)  | 198 (173 to 226)    | 43.1 (37.7 to 49.2) | -22.1 (-32.4 to -10.4) | 4250 (3700 to 4870)      | 922.3 (804 to 1054.9)  | -22.5 (-33.5 to -10.6) |
|            | Female | 101 (80 to 129)     | 19.9 (15.8 to 25.2) | -11.8 (-31 to 12.9)  | 91 (76 to 108)      | 17.3 (14.5 to 20.4) | -8.2 (-22.7 to 9.6)    | 1960 (1650 to 2310)      | 408 (342.4 to 482.2)   | -8.9 (-22.8 to 7.8)    |
| Madagascar | Both   | 678 (495 to 899)    | 6.4 (4.7 to 8.3)    | 0.3 (-19.9 to 24.1)  | 690 (507 to 912)    | 6.8 (5.1 to 8.8)    | 0.3 (-19.3 to 23.2)    | 19600 (14100 to 26000)   | 161.1 (118.6 to 212.2) | 0.1 (-20.8 to 25.9)    |
|            | Male   | 460 (326 to 626)    | 9.3 (6.7 to 12.4)   | -4.8 (-24.3 to 19.1) | 473 (337 to 640)    | 10 (7.3 to 13.3)    | -4.7 (-23.8 to 18.8)   | 13000 (9130 to 17900)    | 228.2 (163.7 to 308.3) | -5.2 (-26.2 to 19.4)   |
|            | Female | 217 (151 to 297)    | 3.7 (2.6 to 5)      | 13.7 (-12.7 to 45.3) | 218 (152 to 296)    | 3.9 (2.8 to 5.2)    | 13.6 (-12.2 to 44.9)   | 6560 (4570 to 8970)      | 98.7 (69 to 134.1)     | 12.9 (-13.3 to 45.3)   |
| Malawi     | Both   | 416 (326 to 521)    | 5.9 (4.7 to 7.3)    | -3.1 (-20.6 to 15.1) | 432 (341 to 537)    | 6.4 (5.1 to 7.8)    | -2.7 (-19.7 to 14.8)   | 11100 (8510 to 14200)    | 145.3 (113.2 to 182.3) | -3.9 (-22.8 to 16.4)   |
|            | Male   | 293 (221 to 378)    | 9.8 (7.6 to 12.5)   | -8.3 (-26.3 to 12.1) | 304 (233 to 391)    | 10.6 (8.3 to 13.4)  | -8 (-25.7 to 11.6)     | 7830 (5810 to 10300)     | 233.3 (177.4 to 300.7) | -8.9 (-27.9 to 13.7)   |
|            | Female | 123 (90 to 156)     | 3.1 (2.3 to 4)      | 12.5 (-12.9 to 41)   | 128 (95 to 165)     | 3.3 (2.5 to 4.3)    | 12.9 (-12.2 to 41.2)   | 3300 (2380 to 4280)      | 76.7 (55.9 to 97.7)    | 11.9 (-15.1 to 42.3)   |
| Malaysia   | Both   | 5170 (4000 to 6560) | 19.8 (15.4 to 25.1) | -7.3 (-27.5 to 16.3) | 5220 (4060 to 6640) | 20.6 (16 to 26)     | -9.3 (-28.9 to 13.3)   | 125000 (95800 to 159000) | 453 (349 to 573.3)     | -8 (-28.8 to 16.1)     |
|            | Male   | 3640 (2790 to 4630) | 28 (21.6 to 35.6)   | -6.8 (-28.2 to 18.3) | 3690 (2830 to 4680) | 29.2 (22.6 to 37.2) | -8.8 (-29.3 to 15.1)   | 88700 (67500 to 113000)  | 640.7 (490.4 to 816.7) | -7.8 (-29.1 to 17.1)   |
|            | Female | 1520 (1160 to 1930) | 11.7 (9 to 14.8)    | -9 (-29.1 to 14)     | 1530 (1180 to 1950) | 12.1 (9.3 to 15.4)  | -11.7 (-30.8 to 10.1)  | 36800 (28100 to 47100)   | 266.5 (203.4 to 339.4) | -8.6 (-29.5 to 16.4)   |
| Maldives   | Both   | 26 (22 to 32)       | 9.6 (7.9 to 11.4)   | -3 (-19.8 to 16.6)   | 27 (22 to 32)       | 10.2 (8.4 to 12.1)  | -4.9 (-21.7 to 14)     | 620 (511 to 742)         | 199.4 (163.9 to 237.7) | -4.5 (-21.6 to 14.7)   |
|            | Male   | 20 (17 to 24)       | 13.7 (11.1 to 16.6) | -3.5 (-22.2 to 17.6) | 21 (17 to 25)       | 14.7 (11.9 to 17.7) | -4.8 (-23.1 to 15.9)   | 478 (389 to 577)         | 283.5 (229.7 to 342)   | -6.3 (-25.2 to 14.5)   |
|            | Female | 6 (5 to 8)          | 4.8 (3.9 to 5.9)    | 6.2 (-14.1 to 31.5)  | 6 (5 to 8)          | 5.1 (4 to 6.2)      | 4.3 (-15.8 to 29.9)    | 142 (114 to 174)         | 101.3 (81.2 to 123.7)  | 3.1 (-17 to 27.6)      |
| Mali       | Both   | 595 (454 to 776)    | 7.2 (5.5 to 9.3)    | 4 (-12.1 to 23.8)    | 618 (473 to 805)    | 7.7 (5.9 to 9.9)    | 3.6 (-12.6 to 22.2)    | 15800 (11800 to 21000)   | 175.8 (133.5 to 230.1) | 4.3 (-13.3 to 25)      |
|            | Male   | 419 (289 to 559)    | 9.9 (6.9 to 13.1)   | 1.3 (-17.7 to 23.2)  | 438 (304 to 585)    | 10.6 (7.5 to 14)    | 0.8 (-17.6 to 21.8)    | 11000 (7460 to 14900)    | 239.3 (164.9 to 320.3) | 1.6 (-17.7 to 23.8)    |
|            | Female | 176 (128 to 227)    | 4.3 (3.2 to 5.6)    | 10.7 (-9.6 to 34.5)  | 180 (133 to 232)    | 4.6 (3.4 to 5.9)    | 10.3 (-9.5 to 34)      | 4820 (3480 to 6330)      | 107.3 (78.5 to 138.9)  | 10.5 (-10.4 to 35.8)   |
| Malta      | Both   | 210 (180 to 248)    | 23 (19.6 to 27.1)   | -8.3 (-22.2 to 8.7)  | 194 (171 to 218)    | 20.7 (18.4 to 23.2) | -10.6 (-20.5 to -0.5)  | 3980 (3520 to 4460)      | 464.4 (412.9 to 521.8) | -9.5 (-19.8 to 1.5)    |
|            | Male   | 168 (142 to 198)    | 39 (33.3 to 45.9)   | -15.2 (-28.4 to 0.9) | 157 (139 to 176)    | 36.2 (32.3 to 40.6) | -16.7 (-25.5 to -6.6)  | 3200 (2840 to 3580)      | 771.8 (685.9 to 859.9) | -15 (-24.3 to -4.5)    |
|            | Female | 42 (34 to 52)       | 9.1 (7.5 to 11.2)   | 10.1 (-9.6 to 33.8)  | 37 (31 to 44)       | 7.7 (6.5 to 9)      | 4.1 (-11.4 to 21.4)    | 778 (656 to 914)         | 185 (157.8 to 217)     | 4.5 (-11.4 to 21.4)    |

|                                 |        |                       |                     |                      |                       |                     |                      |                           |                           |                      |
|---------------------------------|--------|-----------------------|---------------------|----------------------|-----------------------|---------------------|----------------------|---------------------------|---------------------------|----------------------|
| Marshall Islands                | Both   | 10 (6 to 15)          | 30.4 (19.1 to 44.3) | 1.3 (-15.9 to 22.7)  | 10 (6 to 15)          | 32.4 (20.7 to 47.2) | 1.6 (-15.6 to 23.3)  | 290 (172 to 436)          | 758.5 (467.1 to 1119.1)   | 0.1 (-17.6 to 21.5)  |
|                                 | Male   | 7 (4 to 12)           | 43.8 (25.7 to 69.1) | -0.6 (-18.1 to 21.1) | 7 (4 to 12)           | 46.7 (28 to 73.4)   | -0.6 (-17.8 to 21.1) | 215 (116 to 350)          | 1095.6 (615.9 to 1764.9)  | -1.3 (-19.3 to 20.9) |
|                                 | Female | 3 (2 to 4)            | 15.9 (10.7 to 22.3) | 8 (-13.3 to 32.4)    | 3 (2 to 4)            | 16.9 (11.5 to 23.5) | 8 (-13.7 to 32.1)    | 75 (49 to 108)            | 400.4 (268.2 to 571)      | 6.7 (-14.1 to 31)    |
| Mauritania                      | Both   | 213 (149 to 297)      | 10.7 (7.6 to 14.6)  | 3.4 (-19.5 to 27.2)  | 225 (158 to 309)      | 11.6 (8.3 to 15.6)  | 3.5 (-18.6 to 26.5)  | 5340 (3540 to 7710)       | 249.9 (170.4 to 353.2)    | 1 (-23.1 to 25.3)    |
|                                 | Male   | 140 (91 to 217)       | 14 (9.4 to 21.1)    | 0.4 (-22.8 to 23.9)  | 149 (98 to 227)       | 15.3 (10.3 to 22.7) | 0.4 (-21.9 to 23.8)  | 3450 (2120 to 5530)       | 325.4 (204.4 to 511.1)    | -1.8 (-27 to 22.5)   |
|                                 | Female | 73 (51 to 100)        | 7.2 (5.2 to 9.8)    | 9.8 (-16.5 to 35.2)  | 76 (54 to 103)        | 7.8 (5.6 to 10.5)   | 9.8 (-15.1 to 34.9)  | 1890 (1270 to 2610)       | 172.7 (119.2 to 237.5)    | 7.2 (-19.5 to 33.6)  |
| Mauritius                       | Both   | 207 (169 to 250)      | 11.8 (9.7 to 14.3)  | -1.5 (-20 to 20.2)   | 209 (171 to 252)      | 12.2 (10 to 14.6)   | -2.3 (-20.3 to 18.6) | 4950 (3990 to 6030)       | 277.9 (225.1 to 337.2)    | -3 (-22.6 to 19.4)   |
|                                 | Male   | 146 (118 to 179)      | 18.7 (15.2 to 22.6) | -5.9 (-24.7 to 16.2) | 148 (120 to 181)      | 19.5 (15.8 to 23.5) | -6.7 (-25.3 to 14.5) | 3480 (2780 to 4280)       | 422.5 (340.9 to 517.1)    | -7 (-25.7 to 15.7)   |
|                                 | Female | 61 (49 to 74)         | 6.5 (5.2 to 7.8)    | 6 (-14.8 to 29.4)    | 61 (49 to 74)         | 6.5 (5.3 to 7.9)    | 5.1 (-15 to 27.8)    | 1470 (1170 to 1800)       | 158 (126.1 to 193.5)      | 4.1 (-17.4 to 28.5)  |
| Mexico                          | Both   | 10900 (9400 to 12600) | 9.5 (8.2 to 11)     | -2.6 (-15.5 to 11.6) | 11000 (9430 to 12700) | 9.7 (8.4 to 11.2)   | -4.1 (-17.1 to 10)   | 247000 (211000 to 285000) | 208.3 (178.4 to 240.6)    | -3.2 (-16.7 to 11.9) |
|                                 | Male   | 6930 (5680 to 8480)   | 13.2 (10.8 to 16)   | -3.6 (-20.7 to 17.2) | 7180 (5880 to 8670)   | 13.8 (11.3 to 16.7) | -4.5 (-21.1 to 14.6) | 159000 (131000 to 194000) | 290.4 (238.5 to 353.1)    | -3.9 (-21.3 to 16.4) |
|                                 | Female | 3960 (3270 to 4800)   | 6.4 (5.3 to 7.7)    | 0.6 (-17 to 21.2)    | 3830 (3120 to 4660)   | 6.3 (5.1 to 7.6)    | -1.8 (-19.1 to 19.4) | 87400 (70800 to 107000)   | 137.4 (111.5 to 168.4)    | -0.7 (-19.1 to 22)   |
| Federatead States of Micronesia | Both   | 22 (13 to 33)         | 31.3 (19.2 to 45.6) | 5.4 (-15 to 26)      | 22 (13 to 32)         | 32.9 (20.5 to 47.2) | 5.1 (-14 to 25.2)    | 619 (354 to 948)          | 793.7 (469.7 to 1183.1)   | 4.7 (-18.1 to 27.5)  |
|                                 | Male   | 16 (9 to 26)          | 48.4 (28.8 to 75.9) | 3 (-18.5 to 24.5)    | 16 (9 to 25)          | 51.4 (31.3 to 79.4) | 2.7 (-17.4 to 22.7)  | 453 (239 to 763)          | 1210.4 (685 to 1944.2)    | 2.3 (-21.6 to 24.9)  |
|                                 | Female | 6 (4 to 9)            | 17 (11 to 24.1)     | 10.4 (-11.6 to 36.9) | 6 (4 to 9)            | 18 (11.8 to 25.4)   | 10.1 (-11.5 to 35.9) | 166 (103 to 247)          | 423.8 (271.3 to 615.2)    | 9.4 (-13.7 to 36)    |
| Monaco                          | Both   | 68 (55 to 80)         | 75.6 (61.4 to 90.8) | -5.3 (-21.8 to 12.4) | 60 (49 to 71)         | 64.2 (52.3 to 76.9) | -6.4 (-22.1 to 10.9) | 1210 (976 to 1450)        | 1483.3 (1181.9 to 1811.7) | -7.1 (-24.1 to 11.4) |
|                                 | Male   | 43 (36 to 50)         | 101.2 (83.8 to 120) | -6.2 (-21.2 to 11.4) | 38 (32 to 45)         | 88.4 (74 to 104.5)  | -7.3 (-22.1 to 8.8)  | 781 (645 to 929)          | 1986.6 (1610.3 to 2390.2) | -7.7 (-24 to 9.8)    |
|                                 | Female | 25 (19 to 31)         | 52.8 (39.2 to 66.4) | -4.5 (-25.3 to 18.8) | 22 (16 to 27)         | 43.1 (32.1 to 53.8) | -5.7 (-25.8 to 17.1) | 425 (315 to 534)          | 1020.6 (751.9 to 1296.9)  | -6.6 (-26.9 to 17.2) |
| Mongolia                        | Both   | 662 (512 to 863)      | 31.2 (24.7 to 39.7) | 1.3 (-19.1 to 26.6)  | 672 (523 to 869)      | 33.4 (26.5 to 42)   | 1.3 (-18.7 to 25.2)  | 17500 (13400 to 23200)    | 727.7 (568 to 941.3)      | -0.6 (-21.8 to 26.6) |
|                                 | Male   | 521 (391 to 686)      | 58.1 (45 to 74.3)   | 2.1 (-20.6 to 29.4)  | 525 (397 to 686)      | 62.8 (49.2 to 79.4) | 1.9 (-19.8 to 27.6)  | 14000 (10400 to 18700)    | 1335.3 (1008.7 to 1737.4) | 0.7 (-22.2 to 30.2)  |

|            |        |                       |                      |                      |                       |                      |                      |                           |                           |                      |
|------------|--------|-----------------------|----------------------|----------------------|-----------------------|----------------------|----------------------|---------------------------|---------------------------|----------------------|
|            | Female | 141 (109 to 182)      | 12.5 (9.9 to 15.8)   | 0.4 (-21.8 to 28.1)  | 146 (114 to 188)      | 13.7 (10.9 to 17.3)  | 0.1 (-21.1 to 26.2)  | 3520 (2710 to 4620)       | 277.4 (216.3 to 357.4)    | -0.7 (-23.3 to 26.4) |
| Montenegro | Both   | 563 (461 to 685)      | 56.7 (46.5 to 68.9)  | -0.4 (-17.6 to 19.9) | 531 (437 to 643)      | 53.4 (43.8 to 64.4)  | -1.7 (-18 to 17.7)   | 13100 (10700 to 16000)    | 1343.6 (1092.2 to 1633.4) | -3.9 (-20.6 to 16.3) |
|            | Male   | 422 (341 to 522)      | 92.8 (75.3 to 114.3) | -0.6 (-19.6 to 21.9) | 400 (323 to 493)      | 88.6 (71.9 to 108.8) | -1.6 (-19.6 to 20.3) | 9870 (7880 to 12300)      | 2157.3 (1730 to 2682)     | -4.3 (-22.3 to 17.2) |
|            | Female | 141 (113 to 173)      | 26.7 (21.5 to 32.7)  | -0.1 (-18.4 to 21.5) | 131 (105 to 161)      | 24.6 (19.8 to 30.2)  | -2 (-20.1 to 19.3)   | 3210 (2570 to 3940)       | 639.2 (510.8 to 784.4)    | -3.2 (-21.4 to 17.6) |
| Morocco    | Both   | 5280 (3790 to 6810)   | 16.4 (11.7 to 21)    | 11.3 (-12.2 to 41.9) | 5340 (3830 to 6880)   | 17 (12.2 to 21.7)    | 12.4 (-11.2 to 42.9) | 143000 (102000 to 186000) | 418.9 (302.6 to 542.1)    | 9.6 (-14.5 to 39.9)  |
|            | Male   | 4620 (3280 to 6060)   | 28.7 (20.4 to 37.4)  | 9.7 (-14.6 to 42.2)  | 4680 (3320 to 6100)   | 29.8 (21.3 to 38.8)  | 11.4 (-12.8 to 44.5) | 125000 (89000 to 166000)  | 736.8 (528.3 to 963.9)    | 7.9 (-16.9 to 39.6)  |
|            | Female | 656 (475 to 844)      | 4.2 (3 to 5.3)       | 17.3 (-6.6 to 46.8)  | 661 (480 to 845)      | 4.3 (3.2 to 5.5)     | 15.6 (-7.4 to 44.7)  | 17200 (12500 to 22500)    | 102.8 (74.5 to 132.8)     | 14.9 (-9.4 to 45.9)  |
| Mozambique | Both   | 862 (643 to 1140)     | 8.3 (6.3 to 10.9)    | 6.5 (-13.3 to 31)    | 900 (674 to 1190)     | 9 (6.9 to 11.7)      | 6.4 (-12.9 to 30.3)  | 23500 (17200 to 31800)    | 203.9 (151.4 to 271.7)    | 6.1 (-14.4 to 31.4)  |
|            | Male   | 597 (457 to 782)      | 13.6 (10.6 to 17.6)  | 1.3 (-17.3 to 23.1)  | 624 (479 to 815)      | 14.9 (11.6 to 19.2)  | 1.2 (-17.2 to 22)    | 16100 (12200 to 21500)    | 324.2 (249.4 to 421.4)    | 0.7 (-18.5 to 23.8)  |
|            | Female | 265 (169 to 398)      | 4.5 (2.9 to 6.6)     | 23.4 (-10.2 to 67)   | 276 (176 to 409)      | 4.8 (3.1 to 7.1)     | 23.4 (-10 to 67.2)   | 7340 (4620 to 11100)      | 111.1 (70 to 167.4)       | 23.3 (-12.6 to 68.5) |
| Myanmar    | Both   | 10300 (7610 to 14100) | 22.4 (16.8 to 30.2)  | -0.2 (-17.6 to 21.8) | 10600 (7900 to 14400) | 23.8 (17.8 to 31.9)  | -0.6 (-17.3 to 21.7) | 272000 (200000 to 375000) | 556.1 (409.2 to 761.9)    | -2.5 (-19.9 to 20.6) |
|            | Male   | 6980 (4960 to 10300)  | 35.4 (25.2 to 51.9)  | -0.8 (-19.6 to 22.8) | 7200 (5110 to 10600)  | 37.8 (27 to 55.3)    | -1.2 (-19.2 to 22.3) | 185000 (130000 to 275000) | 865 (613.9 to 1281)       | -3.1 (-21.9 to 23.1) |
|            | Female | 3310 (2560 to 4360)   | 12.8 (9.9 to 16.7)   | 4.8 (-12.8 to 27.1)  | 3420 (2640 to 4500)   | 13.5 (10.5 to 17.7)  | 4.9 (-12.7 to 28.7)  | 87000 (66600 to 116000)   | 318.7 (245.7 to 419.5)    | 2.3 (-16.6 to 26.3)  |
| Namibia    | Both   | 107 (83 to 135)       | 7.8 (6.2 to 9.7)     | 7.3 (-11 to 29.1)    | 111 (88 to 139)       | 8.3 (6.7 to 10.2)    | 6.9 (-10.4 to 27.8)  | 2760 (2090 to 3610)       | 189.3 (146.2 to 242.9)    | 5.6 (-13.8 to 29.4)  |
|            | Male   | 72 (56 to 90)         | 12.7 (10.1 to 15.5)  | 5 (-12.2 to 24)      | 75 (59 to 92)         | 13.7 (11 to 16.6)    | 4.6 (-12.1 to 23)    | 1880 (1440 to 2410)       | 304.7 (235.8 to 381.8)    | 3.3 (-15.3 to 24.7)  |
|            | Female | 35 (24 to 48)         | 4.3 (3.1 to 6)       | 17 (-13.3 to 56.7)   | 36 (25 to 50)         | 4.6 (3.3 to 6.3)     | 16.6 (-12.8 to 55.1) | 880 (598 to 1260)         | 105.3 (72.1 to 149.4)     | 14.8 (-16.5 to 57.6) |
| Nauru      | Both   | 2 (1 to 2)            | 38.4 (25.3 to 50.7)  | -1 (-22.2 to 21.4)   | 1 (1 to 2)            | 40.4 (27.1 to 52.8)  | -1.5 (-22.7 to 20.1) | 48 (28 to 67)             | 955.3 (605.6 to 1278.4)   | -2.8 (-24 to 20.2)   |
|            | Male   | 1 (1 to 2)            | 58.5 (37.5 to 79.6)  | 0.3 (-21.4 to 25.5)  | 1 (1 to 1)            | 61.5 (40.2 to 83.2)  | -0.1 (-21.3 to 24.6) | 34 (19 to 49)             | 1458.5 (892.1 to 2036.2)  | -1.9 (-24.4 to 24.1) |
|            | Female | 0 (0 to 1)            | 21.6 (13.6 to 31.5)  | 20.6 (-3.3 to 51)    | 0 (0 to 1)            | 22.5 (14.2 to 32.4)  | 19.7 (-4.1 to 49.9)  | 15 (8 to 22)              | 542 (329 to 797.6)        | 16.4 (-7.4 to 46.4)  |

|             |        |                        |                     |                      |                        |                     |                        |                           |                         |                        |
|-------------|--------|------------------------|---------------------|----------------------|------------------------|---------------------|------------------------|---------------------------|-------------------------|------------------------|
| Nepal       | Both   | 1760 (1260 to 2280)    | 8 (5.9 to 10.4)     | 14 (-10.3 to 40.5)   | 1840 (1330 to 2370)    | 8.6 (6.3 to 11.2)   | 14.1 (-10.4 to 40.3)   | 45200 (32300 to 59200)    | 195.1 (139.5 to 253.5)  | 12.8 (-11.6 to 40.6)   |
|             | Male   | 1200 (873 to 1540)     | 11.5 (8.4 to 14.6)  | 13.4 (-12 to 39.1)   | 1260 (917 to 1610)     | 12.4 (9.1 to 15.7)  | 13.5 (-11.5 to 38.6)   | 30400 (21700 to 39500)    | 277.2 (198.2 to 357.2)  | 12.2 (-12.6 to 38.7)   |
|             | Female | 557 (371 to 803)       | 4.8 (3.2 to 7)      | 21.9 (-4 to 57.4)    | 574 (382 to 830)       | 5.1 (3.4 to 7.6)    | 21.8 (-4.7 to 57.7)    | 14800 (9890 to 21000)     | 119.8 (80.4 to 171.5)   | 20.5 (-5.6 to 57.2)    |
| Netherlands | Both   | 15200 (12000 to 19000) | 44.8 (35.4 to 56.6) | -9.1 (-28.2 to 14.6) | 13200 (12200 to 14000) | 38.1 (35.4 to 40.5) | -10.5 (-14.9 to -5.6)  | 266000 (249000 to 282000) | 825.4 (776.8 to 875.8)  | -13.3 (-17.7 to -8.2)  |
|             | Male   | 8910 (6980 to 11200)   | 55.5 (43.4 to 70)   | -16.9 (-34.8 to 5.5) | 8010 (7420 to 8600)    | 49.8 (46.2 to 53.4) | -17.7 (-22.9 to -12.3) | 155000 (145000 to 166000) | 987.8 (923.7 to 1052.8) | -19.4 (-24.5 to -14.1) |
|             | Female | 6250 (4910 to 7840)    | 36.6 (28.8 to 46.1) | -0.1 (-21.7 to 26.7) | 5160 (4680 to 5600)    | 29.1 (26.6 to 31.5) | -2.2 (-9.4 to 5.9)     | 110000 (101000 to 119000) | 691 (634.4 to 746)      | -6 (-13.2 to 2)        |
| New Zealand | Both   | 2510 (2080 to 2950)    | 32 (26.4 to 37.8)   | -4.3 (-20.4 to 13.2) | 2000 (1860 to 2130)    | 25.3 (23.5 to 26.9) | -6.9 (-11.9 to -2.1)   | 41000 (38500 to 43300)    | 550.3 (519 to 580.4)    | -7.6 (-12.6 to -2.5)   |
|             | Male   | 1310 (1010 to 1670)    | 35.6 (27.3 to 45.4) | -8.2 (-29.4 to 17.5) | 1060 (979 to 1140)     | 28.5 (26.5 to 30.6) | -10.8 (-16.9 to -4.7)  | 21100 (19700 to 22500)    | 591.2 (552.2 to 629.2)  | -10.9 (-16.7 to -5.1)  |
|             | Female | 1190 (932 to 1490)     | 29 (22.6 to 36.4)   | -0.7 (-22.3 to 25.2) | 946 (859 to 1040)      | 22.7 (20.7 to 24.7) | -3.2 (-10.8 to 5)      | 19900 (18300 to 21600)    | 515.8 (476.2 to 558.3)  | -4.3 (-11.7 to 4.3)    |
| Nicaragua   | Both   | 364 (295 to 442)       | 8.7 (7.1 to 10.4)   | -1.8 (-18.2 to 17.7) | 371 (303 to 444)       | 9.1 (7.5 to 10.8)   | -4.5 (-19.9 to 13.6)   | 8450 (6830 to 10300)      | 188.2 (153.3 to 227.7)  | -3.2 (-21.1 to 18.1)   |
|             | Male   | 217 (171 to 266)       | 11.8 (9.3 to 14.3)  | -2.4 (-21.7 to 20.3) | 227 (179 to 276)       | 12.8 (10.2 to 15.4) | -4.2 (-22.8 to 17.8)   | 5120 (3980 to 6350)       | 257.3 (201.5 to 315.3)  | -3.4 (-23.2 to 20.6)   |
|             | Female | 147 (121 to 177)       | 6.2 (5.2 to 7.5)    | 2.6 (-13.7 to 22.3)  | 144 (120 to 171)       | 6.3 (5.3 to 7.4)    | -1.5 (-16.5 to 16.3)   | 3330 (2700 to 4040)       | 133.2 (109.6 to 160.1)  | 0.5 (-17.5 to 21.5)    |
| Niger       | Both   | 654 (415 to 950)       | 9.1 (5.8 to 13)     | 7.8 (-10.8 to 31.7)  | 682 (432 to 988)       | 9.9 (6.3 to 14.1)   | 7.3 (-11.2 to 30.1)    | 17400 (10800 to 25400)    | 214.9 (136.2 to 310.9)  | 8.6 (-11.9 to 35.6)    |
|             | Male   | 515 (317 to 789)       | 14.8 (9.2 to 22.5)  | 8.5 (-10.4 to 32.6)  | 540 (333 to 824)       | 16.3 (10.2 to 24.3) | 8.1 (-10.6 to 32)      | 13600 (8400 to 21200)     | 348.7 (214.9 to 530.6)  | 8.9 (-11.9 to 36.6)    |
|             | Female | 139 (86 to 219)        | 3.6 (2.3 to 5.6)    | 14.2 (-6.7 to 38.8)  | 142 (88 to 223)        | 3.9 (2.5 to 6.1)    | 13.7 (-6.2 to 37.5)    | 3850 (2340 to 6140)       | 88 (54.3 to 139.1)      | 14.7 (-6.8 to 41.8)    |
| Nigeria     | Both   | 5890 (4570 to 7550)    | 7.5 (5.9 to 9.5)    | -2.2 (-27.2 to 33.7) | 6240 (4780 to 8210)    | 8.3 (6.4 to 10.7)   | -1.9 (-26.6 to 33.5)   | 151000 (113000 to 201000) | 172.7 (131.6 to 228.6)  | -2.7 (-28.7 to 34.4)   |
|             | Male   | 4030 (2940 to 5520)    | 10.9 (8.1 to 14.7)  | -4 (-34.8 to 45.5)   | 4310 (3090 to 6120)    | 12 (8.8 to 16.7)    | -4 (-33.7 to 43.5)     | 101000 (70300 to 147000)  | 250.3 (178.1 to 358)    | -4.1 (-35.1 to 47.6)   |
|             | Female | 1860 (1300 to 2540)    | 4.4 (3.1 to 5.7)    | 22.9 (-15.8 to 74.3) | 1930 (1370 to 2610)    | 4.7 (3.4 to 6.2)    | 23 (-13.4 to 77.8)     | 49800 (34500 to 70200)    | 102.2 (72.1 to 139.2)   | 22.6 (-16.9 to 84.9)   |
| Niue        | Both   | 1 (1 to 1)             | 30.5 (24.6 to 37.5) | -0.2 (-12.5 to 14.7) | 1 (1 to 1)             | 31.4 (25.4 to 38.5) | -0.8 (-13.2 to 13.9)   | 16 (12 to 19)             | 717.4 (565 to 897.6)    | -0.8 (-14.3 to 14.7)   |

|                          |        |                        |                     |                       |                        |                     |                        |                           |                           |                        |
|--------------------------|--------|------------------------|---------------------|-----------------------|------------------------|---------------------|------------------------|---------------------------|---------------------------|------------------------|
|                          | Male   | 0 (0 to 1)             | 44.8 (37.2 to 52.7) | -1.5 (-13.2 to 13.1)  | 0 (0 to 1)             | 46.8 (39.1 to 55.1) | -1.9 (-13.4 to 13)     | 10 (8 to 13)              | 1036 (840 to 1244.3)      | -2.3 (-14.9 to 13)     |
|                          | Female | 0 (0 to 0)             | 19.1 (13.8 to 25.8) | 3.1 (-15.6 to 26.8)   | 0 (0 to 0)             | 19.6 (14.1 to 26.4) | 2.5 (-15.9 to 24.3)    | 5 (4 to 7)                | 445.9 (315.2 to 603.1)    | 2.1 (-17.5 to 26.7)    |
| North Macedonia          | Both   | 1340 (1030 to 1700)    | 40.4 (31 to 51.2)   | -4.2 (-26.8 to 21.4)  | 1280 (985 to 1630)     | 38.9 (30 to 49.1)   | -4.9 (-27.1 to 20.2)   | 33100 (25200 to 42400)    | 1000.4 (760.5 to 1285.2)  | -5.9 (-29.3 to 20.5)   |
|                          | Male   | 1090 (819 to 1400)     | 67.5 (51.3 to 86.3) | -6.9 (-29.9 to 18.4)  | 1040 (787 to 1330)     | 65.5 (49.9 to 83.1) | -7.7 (-29.9 to 16.6)   | 26900 (20200 to 35000)    | 1651 (1240.1 to 2140.9)   | -8.4 (-31.7 to 17.4)   |
|                          | Female | 254 (198 to 322)       | 15.3 (11.9 to 19.4) | 2.7 (-20.6 to 30.8)   | 241 (189 to 304)       | 14.5 (11.4 to 18.3) | 1.6 (-21 to 28.9)      | 6160 (4750 to 7920)       | 377.6 (290.8 to 487.5)    | 0.6 (-23.3 to 29.7)    |
| Northern Mariana Islands | Both   | 22 (19 to 25)          | 44.8 (39 to 50)     | -4.4 (-15.5 to 8.3)   | 22 (19 to 25)          | 46.2 (40.4 to 51.5) | -4.5 (-15.4 to 7.3)    | 572 (480 to 658)          | 1021.7 (877.2 to 1161.8)  | -5.3 (-17.6 to 8.2)    |
|                          | Male   | 17 (15 to 19)          | 68.7 (60.4 to 76.6) | -2.8 (-15.5 to 10.7)  | 17 (14 to 19)          | 71.6 (63.3 to 79.9) | -2.5 (-14.9 to 10.9)   | 436 (367 to 502)          | 1546.9 (1336.2 to 1746.2) | -4.3 (-17.2 to 10.5)   |
|                          | Female | 5 (4 to 7)             | 21.4 (17.3 to 26.5) | 3.7 (-15.2 to 27)     | 5 (4 to 6)             | 21.7 (17.6 to 26.8) | 3.4 (-15.4 to 26.5)    | 136 (107 to 171)          | 486.9 (390.7 to 609.4)    | 3.6 (-15.5 to 27.7)    |
| Norway                   | Both   | 2960 (2520 to 3450)    | 31 (26.3 to 36.1)   | -16 (-28.3 to -2.2)   | 2390 (2220 to 2520)    | 24.5 (22.9 to 25.9) | -14.3 (-17.8 to -11.2) | 47300 (44400 to 49800)    | 519.5 (489.8 to 546.5)    | -17.3 (-20.9 to -14.2) |
|                          | Male   | 1600 (1280 to 1970)    | 35.2 (28.2 to 43.4) | -23.3 (-38.5 to -5.5) | 1300 (1220 to 1380)    | 28.6 (26.7 to 30.4) | -22.6 (-26.6 to -18.7) | 25800 (24000 to 27300)    | 580.3 (540.3 to 615.9)    | -25 (-29.3 to -21.2)   |
|                          | Female | 1360 (1090 to 1660)    | 27.6 (22.1 to 33.7) | -7.3 (-24.1 to 13.4)  | 1090 (986 to 1170)     | 21.3 (19.6 to 22.8) | -3.9 (-8.9 to 1.6)     | 21500 (20000 to 23000)    | 466.9 (435.4 to 497.1)    | -7.3 (-12.4 to -1.7)   |
| Oman                     | Both   | 147 (117 to 192)       | 9.9 (8.2 to 11.9)   | -17.6 (-31.8 to 2.4)  | 144 (115 to 187)       | 10.4 (8.7 to 12.6)  | -17.1 (-30.6 to 2)     | 3880 (3000 to 5250)       | 211.7 (170.7 to 267.8)    | -23.1 (-37.7 to -0.4)  |
|                          | Male   | 102 (76 to 145)        | 12.9 (10.2 to 16.6) | -20.5 (-37.1 to 3.8)  | 103 (77 to 143)        | 14.2 (11.4 to 18)   | -19 (-35.5 to 3.9)     | 2760 (2020 to 4080)       | 274.3 (211.8 to 366.4)    | -25.8 (-42.5 to 1.2)   |
|                          | Female | 45 (33 to 54)          | 6.7 (5.1 to 8.1)    | -3.5 (-26.2 to 16.6)  | 42 (30 to 50)          | 6.6 (5 to 8)        | -4.5 (-26.4 to 15.4)   | 1120 (800 to 1380)        | 141.8 (104.1 to 169.6)    | -10.1 (-32.7 to 12)    |
| Pakistan                 | Both   | 18400 (14000 to 24300) | 16.4 (12.5 to 21.5) | -5.5 (-28.4 to 27.3)  | 18600 (14200 to 24000) | 17.2 (13.1 to 22)   | -5.8 (-28.3 to 25.3)   | 523000 (400000 to 681000) | 425.7 (327.1 to 550.8)    | -6.2 (-29.7 to 26.8)   |
|                          | Male   | 15400 (11200 to 21000) | 26.7 (19.5 to 36.1) | -7.2 (-33.8 to 29.4)  | 15600 (11400 to 20900) | 27.9 (20.6 to 37.1) | -7.6 (-33.5 to 27.2)   | 437000 (318000 to 592000) | 689.9 (504.5 to 928)      | -8 (-35.1 to 30.4)     |
|                          | Female | 2980 (2160 to 3930)    | 5.5 (4 to 7.2)      | 11.4 (-16.8 to 50.5)  | 3000 (2200 to 3980)    | 5.8 (4.2 to 7.6)    | 11.3 (-15.5 to 49.1)   | 85700 (62100 to 114000)   | 141.8 (104.1 to 189)      | 10.4 (-17.7 to 50.9)   |
| Palau                    | Both   | 9 (7 to 12)            | 44.5 (36 to 55)     | 1.1 (-14.8 to 22.5)   | 9 (7 to 11)            | 45.8 (37.3 to 56.3) | 0.7 (-14.9 to 21.6)    | 246 (195 to 311)          | 1071.8 (855.7 to 1337.8)  | 0.4 (-15.4 to 22.1)    |
|                          | Male   | 5 (4 to 6)             | 47.7 (38.9 to 58.7) | -1.6 (-17.8 to 18.8)  | 5 (4 to 6)             | 49.1 (40.2 to 60.2) | -2.1 (-18.1 to 17.4)   | 138 (109 to 176)          | 1166 (941.2 to 1464.6)    | -2.2 (-19 to 18.9)     |
|                          | Female | 4 (3 to 5)             | 41.2 (31.6 to 51.6) | 4.1 (-15.6 to 31.2)   | 4 (3 to 5)             | 42.4 (32.6 to 53.1) | 3.6 (-16.1 to 29.4)    | 108 (82 to 138)           | 965 (738.5 to 1223.8)     | 3.2 (-16.6 to 30.6)    |

|                  |        |                        |                     |                       |                        |                     |                       |                           |                          |                       |
|------------------|--------|------------------------|---------------------|-----------------------|------------------------|---------------------|-----------------------|---------------------------|--------------------------|-----------------------|
| Palestine        | Both   | 523 (444 to 613)       | 22.5 (19.1 to 26.1) | 17 (-3.1 to 38.2)     | 530 (448 to 618)       | 23.8 (20.2 to 27.6) | 16.2 (-4 to 37.7)     | 14200 (12000 to 16700)    | 546.4 (462.8 to 639.4)   | 16.3 (-4.1 to 38.2)   |
|                  | Male   | 410 (349 to 478)       | 38 (32.5 to 44)     | 10.5 (-9.2 to 31.8)   | 420 (358 to 487)       | 41.2 (35.3 to 47.7) | 10.1 (-9.3 to 31.2)   | 11200 (9470 to 13100)     | 901.5 (768 to 1046.3)    | 10.7 (-9.2 to 32.7)   |
|                  | Female | 113 (92 to 137)        | 9.1 (7.5 to 11)     | 27.5 (0.5 to 59.2)    | 110 (90 to 133)        | 9.3 (7.6 to 11.1)   | 25.7 (-0.6 to 57.4)   | 3040 (2490 to 3670)       | 219.7 (178.8 to 265)     | 23.1 (-2.7 to 54)     |
| Panama           | Both   | 447 (346 to 572)       | 10.9 (8.4 to 13.8)  | 0.4 (-22.1 to 28.5)   | 447 (347 to 570)       | 10.8 (8.4 to 13.8)  | -2.1 (-23.8 to 24.8)  | 9760 (7430 to 12500)      | 235.8 (179.7 to 302.7)   | -1.2 (-24.3 to 28.4)  |
|                  | Male   | 279 (213 to 359)       | 14 (10.7 to 18)     | -7.1 (-29.7 to 20.8)  | 287 (218 to 368)       | 14.5 (11 to 18.5)   | -8.3 (-30.3 to 18.7)  | 6230 (4680 to 8130)       | 308.3 (232.4 to 402.3)   | -7.3 (-30.7 to 22.5)  |
|                  | Female | 168 (131 to 215)       | 7.9 (6.1 to 10.1)   | 16.8 (-9.4 to 51.7)   | 160 (125 to 204)       | 7.4 (5.8 to 9.4)    | 11.9 (-12 to 44.7)    | 3530 (2740 to 4540)       | 166.9 (129.4 to 214.9)   | 12.7 (-13.6 to 47.7)  |
| Papua New Guinea | Both   | 996 (694 to 1510)      | 21.8 (15.6 to 33)   | 3.6 (-12.9 to 25)     | 1000 (701 to 1520)     | 23.2 (16.6 to 34.8) | 3.8 (-12.5 to 24.9)   | 28600 (19600 to 43900)    | 544.7 (383.5 to 826.8)   | 2.9 (-14.1 to 25.4)   |
|                  | Male   | 809 (558 to 1270)      | 33.8 (23.9 to 52.3) | 1.4 (-15.7 to 23.7)   | 811 (560 to 1270)      | 36.2 (26 to 55.5)   | 1.3 (-15.4 to 23.4)   | 23200 (15900 to 36500)    | 837.1 (580 to 1307.9)    | 1.3 (-16.8 to 24.8)   |
|                  | Female | 188 (117 to 299)       | 8.7 (5.4 to 13.9)   | 11.4 (-9.7 to 39)     | 189 (118 to 301)       | 9.1 (5.7 to 14.7)   | 11.4 (-9.3 to 38.1)   | 5410 (3380 to 8660)       | 218.2 (137.4 to 349.6)   | 10.5 (-12.2 to 39.6)  |
| Paraguay         | Both   | 863 (653 to 1110)      | 15.8 (12 to 20.3)   | 2 (-23.4 to 33.5)     | 881 (672 to 1130)      | 16.3 (12.5 to 20.9) | 0.7 (-24.6 to 31.5)   | 20900 (15700 to 27000)    | 368.1 (277.1 to 475)     | -0.1 (-26.2 to 31.8)  |
|                  | Male   | 657 (499 to 853)       | 25.4 (19.4 to 32.9) | 0.4 (-26.6 to 32.6)   | 670 (510 to 867)       | 26.4 (20.3 to 34.2) | -0.8 (-26.4 to 31.6)  | 16000 (11900 to 20900)    | 584.9 (440 to 765.1)     | -1.6 (-28 to 31.1)    |
|                  | Female | 206 (155 to 268)       | 7.2 (5.4 to 9.3)    | 8.1 (-20.1 to 44.2)   | 211 (160 to 274)       | 7.4 (5.6 to 9.5)    | 6.4 (-21.4 to 41.4)   | 4890 (3640 to 6370)       | 166.2 (123.6 to 216.6)   | 6.3 (-22.3 to 42.8)   |
| Peru             | Both   | 3340 (2510 to 4400)    | 10.5 (7.9 to 13.8)  | -10 (-36.6 to 26.3)   | 3470 (2610 to 4560)    | 10.9 (8.2 to 14.3)  | -11.3 (-37.1 to 23.7) | 76900 (57000 to 102000)   | 238.2 (176.8 to 316.6)   | -12.2 (-38.8 to 23.8) |
|                  | Male   | 1770 (1280 to 2390)    | 11.6 (8.4 to 15.7)  | -13.7 (-41.3 to 22.8) | 1840 (1340 to 2500)    | 12.1 (8.8 to 16.4)  | -14.9 (-41.9 to 20.8) | 40700 (28800 to 55200)    | 261.5 (185.4 to 355.6)   | -15.3 (-43.5 to 22.3) |
|                  | Female | 1580 (1200 to 2040)    | 9.5 (7.2 to 12.3)   | -5.3 (-32.2 to 29.9)  | 1630 (1240 to 2120)    | 9.8 (7.4 to 12.7)   | -6.9 (-32.7 to 26.8)  | 36200 (27300 to 47800)    | 216.4 (163.9 to 285)     | -8.4 (-35.1 to 28.7)  |
| Philippines      | Both   | 13800 (11000 to 17100) | 17.7 (14.2 to 21.8) | 2.1 (-19.1 to 26.6)   | 14000 (11300 to 17100) | 18.5 (15.1 to 22.4) | 2 (-17.8 to 24.4)     | 373000 (301000 to 459000) | 443.6 (359.6 to 543.9)   | 1.3 (-18.9 to 24.5)   |
|                  | Male   | 9520 (7210 to 12400)   | 26.6 (20.4 to 34.2) | -2.9 (-29.1 to 26.6)  | 9570 (7260 to 12300)   | 27.8 (21.3 to 35.4) | -2.9 (-26.1 to 25.4)  | 258000 (195000 to 335000) | 658.2 (499.8 to 848.9)   | -3.8 (-27.5 to 25.2)  |
|                  | Female | 4310 (3200 to 5620)    | 10.4 (7.8 to 13.4)  | 16.3 (-14.8 to 55.9)  | 4390 (3360 to 5630)    | 10.9 (8.4 to 13.9)  | 16.2 (-13.3 to 52.8)  | 115000 (86800 to 150000)  | 259.6 (197.5 to 336.2)   | 15.5 (-15.3 to 54.6)  |
| Poland           | Both   | 30000 (25200 to 35700) | 43.1 (36 to 51.4)   | -6.1 (-21.5 to 11.9)  | 31200 (26100 to 37000) | 44.3 (37 to 52.6)   | -5.6 (-20.9 to 12.4)  | 709000 (586000 to 847000) | 1051.7 (866.5 to 1258.5) | -8.4 (-24.3 to 9.9)   |

|             |        |                           |                     |                       |                           |                     |                       |                              |                         |                       |
|-------------|--------|---------------------------|---------------------|-----------------------|---------------------------|---------------------|-----------------------|------------------------------|-------------------------|-----------------------|
|             | Male   | 20900<br>(16300 to 26300) | 69.5 (54.3 to 87.3) | -12.1 (-31 to 9.9)    | 21800<br>(17100 to 27100) | 72.9 (57.3 to 90.6) | -11.9 (-30.2 to 9.5)  | 499000<br>(389000 to 627000) | 1656 (1292 to 2080.6)   | -14.2 (-32.9 to 8)    |
|             | Female | 9130 (7110 to 11500)      | 23.4 (18.1 to 29.7) | 6.4 (-15.6 to 34.7)   | 9450 (7500 to 11900)      | 23.6 (18.6 to 29.9) | 7.7 (-14.5 to 35.7)   | 210000<br>(165000 to 267000) | 571.1 (448.2 to 729.4)  | 3.9 (-18 to 32.7)     |
| Portugal    | Both   | 4680 (3660 to 5920)       | 21.4 (16.5 to 27.3) | -10.7 (-30.9 to 14.2) | 4710 (4370 to 5020)       | 20.7 (19.3 to 22.1) | -9.4 (-15.4 to -3.4)  | 102000<br>(94600 to 108000)  | 505.6 (470.9 to 539.4)  | -12.1 (-18.7 to -5.7) |
|             | Male   | 3550 (2770 to 4490)       | 36.2 (28.1 to 46.1) | -14.4 (-33.3 to 10)   | 3560 (3320 to 3810)       | 35.6 (33.2 to 38)   | -12.9 (-19.3 to -6.5) | 78000 (72700 to 83200)       | 844.5 (785.3 to 902.6)  | -15.7 (-22.2 to -9.2) |
|             | Female | 1130 (889 to 1430)        | 9.2 (7.1 to 11.8)   | 3.4 (-20.3 to 31.6)   | 1150 (1020 to 1260)       | 8.9 (8 to 9.6)      | 3.5 (-5.8 to 13.3)    | 23600 (21400 to 25600)       | 219.2 (200 to 238.2)    | 2.8 (-6.6 to 13.3)    |
| Puerto Rico | Both   | 881 (690 to 1110)         | 12.4 (9.7 to 15.7)  | -8.7 (-28.7 to 15.9)  | 845 (663 to 1060)         | 11.5 (9 to 14.6)    | -10.3 (-29.3 to 13.5) | 16500 (12900 to 21100)       | 252.7 (196.3 to 324)    | -9.6 (-30.1 to 16)    |
|             | Male   | 542 (421 to 689)          | 17.3 (13.4 to 22.1) | -12.6 (-32.1 to 13)   | 508 (396 to 643)          | 15.9 (12.4 to 20.2) | -14.4 (-33.8 to 10.4) | 10200 (7890 to 13200)        | 347.4 (267 to 451.3)    | -13.3 (-33.9 to 13.2) |
|             | Female | 339 (264 to 428)          | 8.5 (6.6 to 10.8)   | -1.9 (-23.3 to 24.5)  | 336 (261 to 420)          | 8 (6.3 to 10.1)     | -3.5 (-24.2 to 21.8)  | 6290 (4930 to 7980)          | 174.6 (135.1 to 222.9)  | -3.3 (-25.8 to 23.5)  |
| Qatar       | Both   | 125 (89 to 174)           | 18.8 (14.4 to 23.9) | -14.3 (-34.8 to 10.5) | 119 (85 to 165)           | 20.7 (16 to 26.1)   | -12.9 (-32.5 to 10.8) | 3500 (2440 to 4860)          | 373.9 (279.2 to 491.3)  | -18.3 (-39 to 8.4)    |
|             | Male   | 103 (71 to 149)           | 21.2 (16 to 27.6)   | -19.5 (-40.6 to 9.4)  | 101 (70 to 144)           | 23.8 (18.1 to 30.4) | -17.8 (-38.6 to 9.9)  | 2930 (1990 to 4180)          | 426.9 (315.7 to 573)    | -23.1 (-45.1 to 5.6)  |
|             | Female | 21 (16 to 27)             | 11.8 (9.2 to 14.7)  | -3.9 (-23.4 to 17.4)  | 18 (14 to 23)             | 11.8 (9.3 to 14.7)  | -5.9 (-24.5 to 15.7)  | 572 (421 to 734)             | 220.5 (170.7 to 275.2)  | -8.6 (-26.9 to 13.4)  |
| South Korea | Both   | 31800<br>(26500 to 37500) | 35.6 (29.6 to 41.9) | -3.5 (-18.9 to 14.1)  | 23300<br>(20900 to 25600) | 26.3 (23.5 to 28.9) | -7.7 (-15.1 to -0.1)  | 448000<br>(407000 to 490000) | 498.4 (452.3 to 545)    | -12.9 (-20 to -5.3)   |
|             | Male   | 22700<br>(18600 to 27100) | 59.1 (48.6 to 70.4) | -9.4 (-25.4 to 8.1)   | 16600<br>(14800 to 18400) | 44.7 (39.5 to 49.7) | -13.5 (-21.9 to -4.2) | 330000<br>(296000 to 365000) | 812.1 (726.9 to 896.9)  | -18 (-25.9 to -8.8)   |
|             | Female | 9170 (7490 to 10900)      | 18.3 (15 to 21.8)   | 2.7 (-13.7 to 21.2)   | 6690 (5680 to 7580)       | 13.1 (11.2 to 14.9) | -1.8 (-11.8 to 8.7)   | 118000<br>(104000 to 131000) | 245.2 (216.8 to 270.4)  | -6.8 (-15.3 to 1.6)   |
| Moldova     | Both   | 1070 (920 to 1230)        | 18.3 (15.7 to 21)   | -16.8 (-29.7 to -3.5) | 1030 (892 to 1190)        | 17.6 (15.2 to 20.2) | -17.6 (-30 to -4.6)   | 27400 (23500 to 31600)       | 477.4 (409.1 to 549.8)  | -20.7 (-33.6 to -7.3) |
|             | Male   | 842 (718 to 973)          | 34 (28.9 to 39.3)   | -18.7 (-32.1 to -5)   | 811 (693 to 936)          | 33 (28.2 to 37.9)   | -19.3 (-32.5 to -5.9) | 22000 (18600 to 25600)       | 883.1 (746.8 to 1022)   | -22.5 (-36 to -9.2)   |
|             | Female | 226 (185 to 275)          | 6.7 (5.5 to 8.2)    | -6.1 (-25.6 to 16.7)  | 222 (182 to 268)          | 6.5 (5.3 to 7.9)    | -7.5 (-26.6 to 14.6)  | 5360 (4350 to 6560)          | 168 (135.4 to 205.9)    | -9.7 (-29.4 to 13.6)  |
| Romania     | Both   | 11500<br>(9480 to 14000)  | 33.2 (27.2 to 40.5) | -0.2 (-18.2 to 20.3)  | 11000<br>(9120 to 13400)  | 31.2 (25.7 to 37.8) | -1.6 (-19 to 19.1)    | 273000<br>(224000 to 333000) | 826.9 (675.5 to 1012.4) | -4.2 (-21.6 to 16.6)  |



|                                  |        |                        |                     |                       |                        |                     |                       |                              |                           |                       |
|----------------------------------|--------|------------------------|---------------------|-----------------------|------------------------|---------------------|-----------------------|------------------------------|---------------------------|-----------------------|
|                                  | Male   | 8890 (7320 to 10800)   | 56.9 (46.8 to 69.6) | -4.4 (-21.2 to 16.1)  | 8440 (6960 to 10300)   | 53.7 (44.2 to 65.6) | -5.5 (-21.9 to 14.5)  | 213000 (174000 to 261000)    | 1395.6 (1137.7 to 1711.5) | -8.5 (-25.2 to 11.9)  |
|                                  | Female | 2650 (2170 to 3190)    | 13.7 (11.1 to 16.5) | 16.4 (-5.1 to 41)     | 2580 (2130 to 3100)    | 12.8 (10.5 to 15.5) | 14.1 (-6.7 to 37.7)   | 59800 (48600 to 72300)       | 337.1 (271.8 to 410.7)    | 12.8 (-8.7 to 37.6)   |
| Russia                           | Both   | 58200 (49700 to 67800) | 24.5 (21 to 28.6)   | -13.9 (-26.1 to -0.1) | 54100 (46100 to 63100) | 22.8 (19.4 to 26.6) | -15.2 (-27.7 to -1.3) | 1350000 (1140000 to 1580000) | 578.7 (489.4 to 679.6)    | -17.2 (-30 to -2.8)   |
|                                  | Male   | 46000 (37800 to 55600) | 49.8 (41.1 to 60.1) | -19.7 (-33.8 to -3.7) | 42800 (35300 to 51200) | 47.4 (39.4 to 56.6) | -20.6 (-34.3 to -5.4) | 1090000 (891000 to 1310000)  | 1150.4 (944.7 to 1379.6)  | -22.2 (-35.9 to -6.5) |
|                                  | Female | 12200 (10100 to 14800) | 8.5 (7 to 10.4)     | 5.6 (-14.1 to 30.2)   | 11300 (9370 to 13500)  | 7.7 (6.4 to 9.3)    | 2.2 (-16.8 to 24)     | 258000 (210000 to 313000)    | 190 (153.4 to 232.9)      | 0.9 (-19.6 to 24.3)   |
| Rwanda                           | Both   | 472 (326 to 685)       | 8.2 (5.7 to 11.7)   | 9.7 (-8.9 to 32.4)    | 488 (336 to 710)       | 8.8 (6.2 to 12.6)   | 9.7 (-8.6 to 32)      | 12700 (8710 to 18700)        | 199.5 (137.4 to 288.9)    | 9 (-11 to 32.8)       |
|                                  | Male   | 312 (189 to 487)       | 13.4 (8.3 to 20.7)  | 4.7 (-15.2 to 25.4)   | 324 (197 to 504)       | 14.6 (9.2 to 22.5)  | 4.8 (-14.5 to 24.9)   | 8360 (5060 to 13300)         | 317.5 (193.7 to 492.7)    | 3.9 (-16.7 to 25.9)   |
|                                  | Female | 160 (120 to 206)       | 4.7 (3.6 to 6)      | 18.8 (-3.3 to 46.1)   | 165 (124 to 211)       | 5 (3.8 to 6.4)      | 18.9 (-2.7 to 45.6)   | 4360 (3210 to 5690)          | 117 (87 to 150.9)         | 17.7 (-5.9 to 45.7)   |
| Saint Kitts and Nevis            | Both   | 8 (6 to 9)             | 11.4 (9.7 to 13.4)  | 15.1 (-1 to 35.1)     | 7 (6 to 9)             | 11.2 (9.6 to 13.1)  | 12.7 (-2.3 to 31.6)   | 183 (148 to 223)             | 256.4 (210.1 to 309.3)    | 14.5 (-4.4 to 35.5)   |
|                                  | Male   | 5 (4 to 6)             | 15.7 (13.4 to 18.4) | 16.7 (-0.7 to 36.9)   | 5 (4 to 6)             | 15.3 (13.1 to 17.7) | 11.8 (-4.1 to 30.5)   | 123 (98 to 147)              | 347.5 (283.1 to 412.2)    | 18.3 (-2.9 to 41.7)   |
|                                  | Female | 3 (2 to 3)             | 7.5 (6 to 9.2)      | 4.9 (-14.2 to 29.2)   | 3 (2 to 3)             | 7.6 (6.2 to 9.2)    | 5.5 (-11.9 to 27.5)   | 61 (48 to 76)                | 169.7 (133 to 209.7)      | 3.2 (-16.5 to 27.1)   |
| Saint Lucia                      | Both   | 26 (22 to 31)          | 12.2 (10.4 to 14.3) | 16 (-2.4 to 37.3)     | 26 (23 to 31)          | 12.4 (10.6 to 14.5) | 16.1 (-2 to 36.5)     | 636 (535 to 757)             | 289.7 (243.7 to 342.9)    | 13.4 (-5.6 to 34.7)   |
|                                  | Male   | 18 (15 to 21)          | 17.8 (15 to 21.1)   | 11.8 (-6.2 to 34.5)   | 18 (15 to 21)          | 18.1 (15.4 to 21.4) | 11.4 (-6.2 to 32.9)   | 433 (358 to 520)             | 411 (342.9 to 491.6)      | 9.9 (-9.1 to 33.2)    |
|                                  | Female | 8 (7 to 10)            | 7.4 (6.2 to 8.9)    | 23.5 (1.5 to 50.1)    | 9 (7 to 10)            | 7.6 (6.3 to 9.1)    | 23.9 (2.3 to 50.2)    | 203 (168 to 245)             | 178.8 (147.7 to 215.5)    | 19.8 (-2.4 to 46.2)   |
| Saint Vincent and the Grenadines | Both   | 14 (12 to 16)          | 10.2 (8.9 to 11.7)  | 11.6 (-3.7 to 29.1)   | 14 (12 to 16)          | 10.5 (9.2 to 12)    | 11.4 (-3.6 to 28.6)   | 341 (295 to 396)             | 247.3 (214.2 to 287)      | 10.5 (-5.9 to 30)     |
|                                  | Male   | 9 (8 to 10)            | 12.9 (11.2 to 15)   | 8 (-7.8 to 27.5)      | 9 (8 to 11)            | 13.3 (11.5 to 15.4) | 7.3 (-8.1 to 25.7)    | 222 (190 to 261)             | 310.5 (266.2 to 363.8)    | 7.7 (-8.9 to 28.6)    |
|                                  | Female | 5 (4 to 6)             | 7.4 (6.2 to 8.6)    | 13.5 (-6 to 36.2)     | 5 (4 to 6)             | 7.7 (6.5 to 8.9)    | 13.4 (-5.9 to 35.6)   | 119 (100 to 140)             | 179.8 (150.2 to 211.9)    | 12.7 (-8.2 to 36.5)   |
| Samoa                            | Both   | 16 (13 to 21)          | 11.2 (8.7 to 13.9)  | 1.6 (-12.7 to 19.1)   | 16 (13 to 21)          | 11.6 (9.1 to 14.4)  | 1.4 (-12.7 to 18.5)   | 427 (329 to 556)             | 280 (216.3 to 358.6)      | 0.9 (-14.5 to 20)     |
|                                  | Male   | 11 (8 to 14)           | 15.4 (11.1 to 19.8) | -2.3 (-16.5 to 14.1)  | 11 (8 to 14)           | 16 (11.6 to 20.5)   | -2.4 (-16.4 to 13.4)  | 289 (206 to 388)             | 379.7 (273.9 to 498.7)    | -2.9 (-18.2 to 15)    |

|                       |        |                     |                     |                      |                     |                     |                      |                           |                          |                      |
|-----------------------|--------|---------------------|---------------------|----------------------|---------------------|---------------------|----------------------|---------------------------|--------------------------|----------------------|
|                       | Female | 5 (4 to 7)          | 7.3 (5.5 to 9.5)    | 7.7 (-14.1 to 37)    | 5 (4 to 7)          | 7.5 (5.7 to 9.9)    | 7.7 (-14.2 to 36.7)  | 139 (101 to 184)          | 182.4 (136.3 to 240.4)   | 7.3 (-14.7 to 36.5)  |
| San Marino            | Both   | 23 (17 to 30)       | 36.8 (27.7 to 48.6) | -0.7 (-20.4 to 23)   | 21 (14 to 29)       | 32.5 (21.2 to 47)   | -3.2 (-29.4 to 31.8) | 417 (268 to 614)          | 731.1 (463.2 to 1090)    | -2.7 (-30.2 to 34.2) |
|                       | Male   | 16 (12 to 21)       | 55.1 (41.6 to 71.4) | -3.3 (-22.8 to 20.2) | 15 (10 to 21)       | 49.1 (31.9 to 69.1) | -5.7 (-31.4 to 26.7) | 294 (187 to 423)          | 1056.9 (665 to 1536.7)   | -4.4 (-31.5 to 30.7) |
|                       | Female | 6 (5 to 9)          | 20.3 (14.8 to 28.8) | 3.3 (-21.4 to 34.3)  | 6 (4 to 9)          | 17.9 (11.5 to 28)   | -0.2 (-30.5 to 43.4) | 123 (78 to 193)           | 426.6 (266.8 to 673.1)   | 0.2 (-31.5 to 45.1)  |
| São Tome and Príncipe | Both   | 19 (15 to 24)       | 18.9 (14.9 to 23.4) | 11.3 (-6.3 to 31)    | 20 (15 to 24)       | 20.3 (16 to 25.1)   | 11 (-6.5 to 30.7)    | 504 (384 to 643)          | 452.2 (350.1 to 568.7)   | 10.5 (-8.2 to 29.9)  |
|                       | Male   | 13 (11 to 16)       | 27.9 (22.9 to 34)   | 8 (-10.5 to 29)      | 14 (11 to 17)       | 30.4 (25 to 37)     | 7.8 (-10.2 to 28.3)  | 340 (268 to 431)          | 652.8 (526 to 804.8)     | 7.1 (-11.7 to 28.9)  |
|                       | Female | 6 (3 to 8)          | 10.8 (6.2 to 15.5)  | 19.3 (-5.6 to 44.6)  | 6 (3 to 9)          | 11.5 (6.5 to 16.6)  | 19.2 (-5.7 to 44.2)  | 164 (94 to 238)           | 268.5 (153.1 to 386.1)   | 17.4 (-7.7 to 43)    |
| Saudi Arabia          | Both   | 1550 (1190 to 1900) | 8.8 (7 to 10.6)     | -3.9 (-22.3 to 15.7) | 1490 (1150 to 1830) | 9.1 (7.3 to 11.1)   | -5.5 (-22.8 to 13.2) | 45500 (34500 to 57200)    | 208 (162.6 to 253.2)     | -5.3 (-23.8 to 15.2) |
|                       | Male   | 1120 (841 to 1390)  | 10.9 (8.5 to 13.7)  | -9.9 (-28.5 to 11.1) | 1110 (842 to 1380)  | 11.7 (9.1 to 14.5)  | -10.8 (-28.8 to 9.8) | 32800 (24500 to 41900)    | 260.5 (199.9 to 325)     | -9.9 (-28.8 to 12)   |
|                       | Female | 429 (321 to 551)    | 5.5 (4.2 to 6.9)    | 7.4 (-17.2 to 35)    | 382 (286 to 493)    | 5.3 (4.1 to 6.7)    | 2.9 (-20.5 to 29)    | 12700 (9340 to 16500)     | 127.2 (95.8 to 162.8)    | 3.2 (-20.3 to 31.2)  |
| Senegal               | Both   | 875 (662 to 1140)   | 12.2 (9.4 to 15.8)  | 9.6 (-11.1 to 34.7)  | 921 (701 to 1200)   | 13.2 (10.2 to 17.2) | 9.2 (-11.1 to 34.6)  | 22500 (16600 to 29900)    | 291 (218.1 to 382.1)     | 9.4 (-13.4 to 35)    |
|                       | Male   | 655 (485 to 891)    | 19.1 (14.2 to 25.8) | 6.7 (-14.8 to 32.8)  | 691 (513 to 942)    | 20.8 (15.7 to 28.2) | 6.5 (-14.2 to 32.3)  | 16800 (12100 to 23000)    | 452.4 (332.6 to 617.3)   | 6.5 (-16.1 to 34.8)  |
|                       | Female | 220 (167 to 291)    | 5.8 (4.5 to 7.6)    | 22 (-1.3 to 52.6)    | 230 (176 to 302)    | 6.3 (4.9 to 8.1)    | 21.5 (-2 to 51.4)    | 5790 (4280 to 7810)       | 140.7 (106.2 to 187.4)   | 21.9 (-3.2 to 54.2)  |
| Serbia                | Both   | 7700 (6060 to 9690) | 49.4 (38.8 to 62.4) | -3.5 (-24.3 to 21.5) | 7260 (5730 to 9070) | 46 (36.1 to 57.5)   | -4.3 (-24.8 to 19.8) | 177000 (138000 to 223000) | 1183.5 (919.2 to 1497.6) | -6.2 (-27.1 to 18.9) |
|                       | Male   | 5500 (4290 to 6930) | 75.3 (58.5 to 95)   | -7.7 (-28 to 16.2)   | 5250 (4110 to 6570) | 71.5 (56 to 89.7)   | -7.9 (-28 to 15.3)   | 128000 (99600 to 163000)  | 1799.3 (1392.8 to 2300)  | -10 (-30 to 14.4)    |
|                       | Female | 2200 (1720 to 2790) | 26.9 (21.1 to 34.3) | 6.9 (-16.6 to 37.1)  | 2010 (1580 to 2530) | 24.1 (18.9 to 30.5) | 5 (-18.1 to 33.5)    | 48700 (37700 to 62300)    | 634.4 (488.5 to 818.6)   | 3.8 (-19.8 to 34)    |
| Seychelles            | Both   | 19 (17 to 22)       | 17.7 (15.4 to 20.3) | 4.2 (-8.9 to 20.3)   | 19 (17 to 22)       | 18.4 (16 to 21.2)   | 3.4 (-9.5 to 18.8)   | 477 (414 to 554)          | 416.9 (363.4 to 483.4)   | 3.2 (-9.8 to 20.1)   |
|                       | Male   | 14 (12 to 17)       | 28.6 (24.4 to 33.7) | -1.7 (-16.4 to 16.2) | 15 (12 to 17)       | 30.1 (25.7 to 35.5) | -2.8 (-17.2 to 14.5) | 367 (311 to 444)          | 661.4 (561.6 to 790.9)   | -1.9 (-17.1 to 18.1) |
|                       | Female | 5 (4 to 6)          | 8.3 (6.8 to 9.9)    | 9.7 (-11 to 32.7)    | 5 (4 to 6)          | 8.8 (7.2 to 10.5)   | 8.5 (-11.7 to 31.4)  | 109 (89 to 131)           | 189.3 (155.7 to 228.2)   | 8.4 (-12.4 to 31.3)  |
| Sierra Leone          | Both   | 361 (257 to 483)    | 10.5 (7.5 to 13.9)  | 6.7 (-13.4 to 34.1)  | 378 (271 to 501)    | 11.4 (8.1 to 15.1)  | 6 (-13.2 to 32.5)    | 9510 (6690 to 13000)      | 253.8 (180.1 to 343.3)   | 6.6 (-14.6 to 35.1)  |

|                 |        |                     |                     |                       |                     |                     |                        |                           |                          |                       |
|-----------------|--------|---------------------|---------------------|-----------------------|---------------------|---------------------|------------------------|---------------------------|--------------------------|-----------------------|
|                 | Male   | 270 (183 to 370)    | 16 (10.9 to 21.8)   | 1.7 (-18.3 to 29.2)   | 285 (192 to 389)    | 17.5 (11.9 to 23.8) | 1.2 (-18.3 to 27.6)    | 7040 (4730 to 9780)       | 380.4 (259.3 to 522.8)   | 1.3 (-19.8 to 30.4)   |
|                 | Female | 90 (68 to 118)      | 5.1 (3.9 to 6.7)    | 18.8 (-3.9 to 47.9)   | 93 (71 to 122)      | 5.5 (4.1 to 7.1)    | 18.2 (-4.4 to 46.4)    | 2470 (1800 to 3250)       | 126.2 (93.9 to 166.8)    | 18.6 (-5.5 to 49.1)   |
| Singapore       | Both   | 2160 (1720 to 2710) | 28.4 (22.7 to 35.4) | -14.5 (-31 to 6)      | 1570 (1410 to 1680) | 20.9 (18.7 to 22.5) | -18.5 (-23.8 to -13.3) | 32000 (29500 to 34300)    | 406.2 (373.2 to 435)     | -20 (-25.1 to -14.8)  |
|                 | Male   | 1370 (1080 to 1720) | 38.7 (30.8 to 48.3) | -20.1 (-36.8 to 0.3)  | 1010 (915 to 1090)  | 29.4 (26.4 to 31.7) | -23.4 (-30 to -17.6)   | 20900 (19000 to 22400)    | 549.3 (499.2 to 590.6)   | -25 (-31.6 to -19.2)  |
|                 | Female | 790 (627 to 991)    | 19.7 (15.6 to 24.8) | -7.3 (-25 to 15.1)    | 556 (476 to 621)    | 13.9 (11.9 to 15.5) | -12.4 (-21.1 to -3.2)  | 11100 (9750 to 12400)     | 277 (242.9 to 308.5)     | -13.1 (-21.6 to -3.7) |
| Slovakia        | Both   | 3130 (2430 to 4050) | 33.6 (26.1 to 43.4) | -5.3 (-26.6 to 21.7)  | 2530 (1980 to 3280) | 27 (21 to 35)       | -8.9 (-29.2 to 17.4)   | 59400 (45600 to 77500)    | 649.9 (497.9 to 844.8)   | -9.8 (-30.6 to 17.1)  |
|                 | Male   | 2370 (1800 to 3100) | 59.2 (45.3 to 77.2) | -9 (-30.2 to 17.3)    | 1920 (1470 to 2520) | 48.2 (37.2 to 63)   | -12.8 (-32.8 to 13.1)  | 45600 (34700 to 59700)    | 1110.8 (845.1 to 1445.9) | -13.4 (-34 to 13.6)   |
|                 | Female | 759 (596 to 954)    | 14.6 (11.4 to 18.4) | -1.5 (-24.1 to 26.6)  | 609 (483 to 764)    | 11.6 (9.1 to 14.5)  | -4.2 (-25.7 to 21.7)   | 13800 (10600 to 17500)    | 281.9 (216.5 to 358.4)   | -5.4 (-27.8 to 21.7)  |
| Slovenia        | Both   | 1400 (1080 to 1820) | 33.9 (26 to 44.2)   | -10.3 (-30.8 to 16.1) | 1270 (984 to 1640)  | 29.9 (23 to 38.9)   | -10.4 (-30.1 to 15)    | 27700 (21200 to 36000)    | 705.3 (539.2 to 919.5)   | -12.3 (-32.6 to 14.7) |
|                 | Male   | 971 (749 to 1260)   | 51.4 (39.6 to 66.8) | -16.1 (-35.2 to 7.7)  | 889 (685 to 1160)   | 46.9 (36.2 to 61)   | -16.2 (-34.7 to 7)     | 19700 (15000 to 25900)    | 1054.1 (801.6 to 1395)   | -17.4 (-36.7 to 6.5)  |
|                 | Female | 424 (324 to 555)    | 19.2 (14.6 to 25.3) | -2 (-26.6 to 29.2)    | 380 (290 to 498)    | 16.3 (12.4 to 21.4) | -3.2 (-26.7 to 27.1)   | 8010 (6020 to 10400)      | 396.8 (295.8 to 521.2)   | -3.7 (-28.1 to 28.1)  |
| Solomon Islands | Both   | 102 (53 to 167)     | 32.7 (18.6 to 51.4) | 7 (-10.6 to 31)       | 101 (54 to 163)     | 34.1 (19.8 to 53)   | 6.5 (-11 to 29.1)      | 3090 (1550 to 5150)       | 859.2 (460.5 to 1392.4)  | 6.3 (-11.8 to 31.1)   |
|                 | Male   | 83 (40 to 145)      | 52.3 (28 to 88.6)   | 5.9 (-11.9 to 30.1)   | 82 (40 to 142)      | 54.6 (29.9 to 91.7) | 5.6 (-11.7 to 28.7)    | 2510 (1180 to 4430)       | 1374.8 (684 to 2378.4)   | 5 (-13 to 30.2)       |
|                 | Female | 19 (12 to 29)       | 12.3 (8.3 to 17.9)  | 24.1 (0.6 to 52.8)    | 19 (12 to 28)       | 12.8 (8.9 to 18.6)  | 23.6 (0.2 to 51)       | 574 (359 to 871)          | 324.5 (211.7 to 481.7)   | 22.3 (-1.8 to 51.2)   |
| Somalia         | Both   | 365 (205 to 607)    | 5.6 (3.1 to 9.1)    | -4.9 (-23.4 to 17.8)  | 377 (215 to 620)    | 6 (3.4 to 9.8)      | -4.8 (-22.9 to 17.6)   | 10800 (6110 to 18300)     | 146.2 (83 to 240.5)      | -5.3 (-24.5 to 17.3)  |
|                 | Male   | 291 (159 to 502)    | 10.9 (6.1 to 18.4)  | -5.9 (-23.9 to 15.2)  | 301 (165 to 514)    | 11.8 (6.5 to 19.8)  | -5.7 (-23.1 to 15)     | 8620 (4720 to 15100)      | 276.7 (152.9 to 474.8)   | -6.5 (-24.6 to 15.8)  |
|                 | Female | 74 (40 to 126)      | 1.9 (1.1 to 3.4)    | 2 (-22 to 29.2)       | 77 (42 to 133)      | 2.1 (1.1 to 3.6)    | 2.1 (-21 to 27.5)      | 2230 (1220 to 3920)       | 52.3 (28.5 to 90.4)      | 1.3 (-22.7 to 28.1)   |
| South Africa    | Both   | 8520 (7630 to 9700) | 19.1 (17.2 to 21.6) | -12.6 (-21.9 to -0.1) | 8690 (7810 to 9910) | 20 (18 to 22.6)     | -12.6 (-21.8 to -0.7)  | 222000 (198000 to 256000) | 471.6 (421.8 to 542.9)   | -15.9 (-25.6 to -3.1) |
|                 | Male   | 5830 (5110 to 6810) | 31 (27.5 to 36)     | -15.8 (-26.2 to -1.4) | 5870 (5160 to 6850) | 32.4 (28.8 to 37.4) | -16.2 (-25.9 to -1.9)  | 157000 (137000 to 185000) | 767.8 (672.1 to 901.5)   | -18.8 (-29.1 to -3.3) |
|                 | Female | 2690 (2370 to 3070) | 10.6 (9.4 to 12.1)  | -6.9 (-18 to 6.6)     | 2830 (2490 to 3200) | 11.3 (10 to 12.8)   | -6.4 (-17 to 6.5)      | 64800 (56300 to 74700)    | 247.3 (215.7 to 284.6)   | -10.6 (-22.4 to 3.9)  |

|             |        |                        |                     |                       |                        |                     |                        |                           |                          |                        |
|-------------|--------|------------------------|---------------------|-----------------------|------------------------|---------------------|------------------------|---------------------------|--------------------------|------------------------|
| South Sudan | Both   | 318 (208 to 454)       | 8.8 (5.9 to 12.5)   | -4.1 (-21 to 16.7)    | 334 (216 to 480)       | 9.6 (6.4 to 13.6)   | -4.5 (-21.8 to 16.6)   | 8640 (5500 to 12700)      | 215 (138.9 to 309)       | -4.8 (-23.3 to 17.9)   |
|             | Male   | 247 (150 to 355)       | 13.1 (8.1 to 18.6)  | -4.1 (-22 to 17.6)    | 261 (158 to 376)       | 14.4 (8.9 to 20.5)  | -4.5 (-22.7 to 17.4)   | 6570 (3860 to 9670)       | 315.6 (189.7 to 457.2)   | -4.9 (-23.7 to 17.4)   |
|             | Female | 71 (46 to 131)         | 3.9 (2.6 to 7.1)    | 8.2 (-13 to 35.9)     | 73 (47 to 133)         | 4.2 (2.8 to 7.6)    | 8.2 (-13.6 to 37.9)    | 2070 (1270 to 3780)       | 99.9 (63.6 to 182.7)     | 8 (-15.1 to 41.4)      |
| Spain       | Both   | 29500 (23100 to 37500) | 33.2 (25.9 to 42.5) | -7.2 (-27.5 to 18.8)  | 24500 (22800 to 26000) | 26.7 (25 to 28.2)   | -7.7 (-12.7 to -2.7)   | 524000 (490000 to 553000) | 633.5 (594.8 to 668.8)   | -10 (-15.2 to -5.1)    |
|             | Male   | 23600 (18500 to 30100) | 57.5 (44.9 to 73.6) | -11.7 (-31.5 to 13.5) | 19500 (18000 to 20700) | 46.7 (43.2 to 49.5) | -12.6 (-18.2 to -7.2)  | 411000 (382000 to 436000) | 1045.2 (973.1 to 1110.9) | -14.7 (-20.5 to -9.2)  |
|             | Female | 5930 (4560 to 7640)    | 12.9 (9.9 to 16.8)  | 11.6 (-14.4 to 44.7)  | 5060 (4480 to 5580)    | 10.4 (9.3 to 11.5)  | 12 (1.8 to 23.3)       | 114000 (101000 to 125000) | 273.2 (245.5 to 301.4)   | 8.9 (-1.8 to 20.9)     |
| Sri Lanka   | Both   | 2510 (1820 to 3410)    | 9.7 (7.1 to 13.1)   | -3.9 (-29.3 to 29.5)  | 2480 (1800 to 3370)    | 9.8 (7.2 to 13.2)   | -5.7 (-30.2 to 26.5)   | 61100 (44100 to 83500)    | 231.4 (167.5 to 315.6)   | -6 (-31.8 to 26.8)     |
|             | Male   | 1730 (1200 to 2450)    | 15 (10.5 to 20.9)   | -8.4 (-34.4 to 28.8)  | 1700 (1180 to 2410)    | 15.2 (10.7 to 21)   | -10 (-35.6 to 25.2)    | 42900 (29700 to 60600)    | 356 (248.4 to 498.9)     | -10.4 (-37 to 25.3)    |
|             | Female | 775 (571 to 1030)      | 5.5 (4.1 to 7.3)    | 10.8 (-18.6 to 44.4)  | 774 (570 to 1020)      | 5.6 (4.1 to 7.3)    | 8.4 (-19.8 to 40.4)    | 18300 (13300 to 24300)    | 128.6 (94.2 to 170.8)    | 7.9 (-21.2 to 42.8)    |
| Sudan       | Both   | 1530 (983 to 2360)     | 8.3 (5.4 to 12.9)   | 3.4 (-16.5 to 29.6)   | 1550 (1020 to 2390)    | 8.8 (5.9 to 13.7)   | 3.3 (-16.2 to 29.7)    | 41400 (26800 to 64400)    | 203.8 (131.7 to 318.1)   | 1.9 (-18.4 to 29.5)    |
|             | Male   | 1120 (683 to 1920)     | 11.4 (6.9 to 19.6)  | -2 (-22.5 to 26)      | 1160 (703 to 1980)     | 12.2 (7.5 to 20.9)  | -1.9 (-22 to 26.4)     | 29800 (17900 to 51300)    | 279.4 (168.4 to 479.8)   | -3.3 (-23.7 to 26.9)   |
|             | Female | 403 (279 to 552)       | 4.5 (3.2 to 5.9)    | 24.6 (-5.4 to 60.3)   | 394 (279 to 537)       | 4.6 (3.3 to 6.1)    | 23.7 (-5.6 to 58.7)    | 11600 (7770 to 16700)     | 112.6 (79 to 155.1)      | 22.3 (-7.6 to 58.9)    |
| Suriname    | Both   | 91 (75 to 110)         | 15.1 (12.5 to 18.2) | 7.9 (-11.3 to 30.8)   | 92 (76 to 111)         | 15.5 (12.8 to 18.6) | 7.3 (-12.2 to 29.5)    | 2310 (1880 to 2810)       | 370.5 (302 to 450.4)     | 7.4 (-12.1 to 31.3)    |
|             | Male   | 59 (48 to 73)          | 21.4 (17.4 to 26.5) | 5.2 (-15.2 to 29.9)   | 60 (48 to 74)          | 22 (17.9 to 27.2)   | 4.5 (-15.5 to 28.8)    | 1510 (1210 to 1870)       | 515.6 (416.4 to 636.6)   | 4.3 (-16.2 to 30.1)    |
|             | Female | 32 (26 to 39)          | 9.9 (7.9 to 12)     | 15.2 (-8 to 42.5)     | 33 (26 to 40)          | 10.2 (8.2 to 12.4)  | 14.7 (-8.5 to 41.7)    | 801 (641 to 984)          | 244 (195.1 to 297.4)     | 15.1 (-9.6 to 43.9)    |
| Sweden      | Both   | 4340 (3700 to 5020)    | 20.8 (17.7 to 24.2) | -6 (-19.8 to 8.9)     | 4340 (4010 to 4590)    | 20 (18.7 to 21.2)   | -6.9 (-11.5 to -2.5)   | 81100 (76300 to 85500)    | 416.1 (392.9 to 437.3)   | -10.9 (-15.2 to -6.6)  |
|             | Male   | 2110 (1690 to 2590)    | 20.9 (16.8 to 25.8) | -13.5 (-30.2 to 8.2)  | 2160 (2010 to 2310)    | 21 (19.6 to 22.4)   | -13.9 (-19 to -8.7)    | 39900 (37400 to 42400)    | 417.4 (392.5 to 442.2)   | -16.8 (-21.6 to -11.7) |
|             | Female | 2240 (1810 to 2710)    | 20.9 (16.9 to 25.3) | 1.1 (-17.4 to 23.1)   | 2180 (1950 to 2340)    | 19.4 (17.8 to 20.8) | -0.2 (-5.9 to 5.7)     | 41200 (37900 to 44100)    | 418.5 (389.3 to 447.2)   | -5.3 (-10.7 to 0.5)    |
| Switzerland | Both   | 4370 (3410 to 5520)    | 26.2 (20.3 to 33.1) | -14.8 (-33.9 to 8.3)  | 3830 (3480 to 4100)    | 22.2 (20.5 to 23.7) | -15.1 (-19.9 to -10.1) | 77900 (72300 to 82800)    | 494.7 (460.5 to 525.5)   | -17.7 (-22.5 to -12.9) |
|             | Male   | 2640 (2060 to 3350)    | 33.6 (26.1 to 42.8) | -20 (-38.9 to 2.5)    | 2370 (2170 to 2570)    | 29.8 (27.3 to 32.1) | -20.4 (-26.2 to -14.5) | 47900 (44200 to 51600)    | 631.5 (582.5 to 678.9)   | -22.3 (-28.2 to -16.4) |

|                               |        |                        |                     |                       |                        |                     |                       |                           |                         |                       |
|-------------------------------|--------|------------------------|---------------------|-----------------------|------------------------|---------------------|-----------------------|---------------------------|-------------------------|-----------------------|
|                               | Female | 1730 (1350 to 2200)    | 19.9 (15.4 to 25.4) | -8.2 (-28.3 to 17.1)  | 1460 (1300 to 1600)    | 16.1 (14.5 to 17.5) | -8 (-15.6 to -0.1)    | 30000 (27300 to 32600)    | 373.1 (341.6 to 404.1)  | -11.3 (-18.6 to -3.7) |
| Syria                         | Both   | 1370 (1010 to 1810)    | 11.1 (8.2 to 14.5)  | -5.3 (-28.1 to 22.1)  | 1370 (1010 to 1810)    | 11.6 (8.7 to 15.1)  | -5.8 (-27.6 to 20.5)  | 37000 (26900 to 49500)    | 274.4 (203 to 363.5)    | -5.4 (-29.3 to 24)    |
|                               | Male   | 991 (720 to 1310)      | 15.4 (11.3 to 20.1) | -6.8 (-31.4 to 23.1)  | 1010 (735 to 1330)     | 16.2 (11.9 to 21)   | -6.9 (-31 to 22.2)    | 26800 (19300 to 36100)    | 389.3 (283.4 to 517.1)  | -6.9 (-32.3 to 25.1)  |
|                               | Female | 382 (262 to 519)       | 6.6 (4.6 to 8.8)    | 3.3 (-25.5 to 35.8)   | 368 (251 to 496)       | 6.8 (4.8 to 8.9)    | 1.9 (-26 to 32.7)     | 10100 (6960 to 14000)     | 155.3 (106.3 to 210.2)  | 4 (-25.2 to 39.6)     |
| Taiwan<br>(Province of China) | Both   | 12600 (9960 to 16200)  | 31.9 (25.2 to 40.9) | -7.1 (-27 to 18)      | 12100 (9530 to 15300)  | 30.3 (24.1 to 38.6) | -4.4 (-24 to 21.2)    | 250000 (195000 to 323000) | 638.7 (500 to 824.7)    | -3.7 (-24.9 to 24.1)  |
|                               | Male   | 7800 (6140 to 9890)    | 42.6 (33.5 to 54.2) | -7.4 (-27.5 to 18.7)  | 7530 (5920 to 9580)    | 41.3 (32.5 to 52.5) | -4.7 (-25.2 to 21.1)  | 156000 (122000 to 204000) | 847.3 (665.2 to 1101.7) | -4.7 (-26.4 to 23.8)  |
|                               | Female | 4820 (3750 to 6190)    | 22.8 (17.8 to 29.3) | -2.4 (-22.7 to 24.6)  | 4530 (3520 to 5770)    | 21.2 (16.5 to 27.1) | 1.3 (-19.7 to 28.7)   | 93900 (73500 to 121000)   | 457.2 (355.9 to 592)    | 1.2 (-21 to 30.9)     |
| Tajikistan                    | Both   | 593 (479 to 740)       | 12 (9.8 to 14.8)    | -6.9 (-26.8 to 17.4)  | 586 (476 to 732)       | 12.6 (10.3 to 15.5) | -5.6 (-25.5 to 18.7)  | 17300 (13800 to 21800)    | 300.3 (243.9 to 374)    | -10.4 (-29.7 to 13.9) |
|                               | Male   | 411 (323 to 527)       | 17.8 (14.3 to 22.4) | -9 (-29.5 to 16.4)    | 408 (322 to 522)       | 18.8 (15.2 to 23.5) | -7.3 (-28 to 17.7)    | 11800 (9320 to 15200)     | 436.7 (347 to 555.2)    | -13.7 (-33.7 to 11)   |
|                               | Female | 182 (146 to 229)       | 6.8 (5.5 to 8.5)    | 4.7 (-17.8 to 32.3)   | 178 (143 to 224)       | 7.1 (5.7 to 8.8)    | 5.1 (-16.9 to 31.8)   | 5470 (4330 to 6890)       | 175.3 (141 to 219.8)    | 3.4 (-19.4 to 32.9)   |
| Thailand                      | Both   | 22500 (17000 to 29600) | 22.2 (16.8 to 29)   | -9.5 (-32.8 to 20.5)  | 23100 (17500 to 30100) | 23 (17.4 to 29.8)   | -10.4 (-33.2 to 18.1) | 524000 (390000 to 699000) | 512.9 (382.7 to 681.9)  | -10.9 (-34.6 to 20.2) |
|                               | Male   | 14700 (10800 to 19400) | 32 (23.7 to 42.1)   | -10.2 (-34.4 to 22.8) | 15000 (11000 to 19700) | 33.1 (24.7 to 43.5) | -11.1 (-34.7 to 20.8) | 348000 (254000 to 466000) | 735.8 (538.4 to 977.9)  | -11.4 (-36.1 to 22.1) |
|                               | Female | 7850 (5970 to 10300)   | 14.2 (10.8 to 18.6) | -8.2 (-32.6 to 21.9)  | 8130 (6110 to 10600)   | 14.7 (11 to 19.1)   | -9.3 (-32.7 to 19.9)  | 176000 (131000 to 235000) | 321.7 (238.8 to 427.9)  | -10.1 (-35.6 to 20.9) |
| Timor-Leste                   | Both   | 158 (113 to 207)       | 19.5 (13.9 to 25.3) | 12.2 (-12 to 38.9)    | 165 (116 to 216)       | 20.9 (15 to 27.1)   | 11.1 (-12.5 to 36.8)  | 4100 (2890 to 5400)       | 479.5 (341.3 to 629.5)  | 13.9 (-11.2 to 44.9)  |
|                               | Male   | 113 (75 to 148)        | 28.1 (18.7 to 36.5) | 11.6 (-12.5 to 41.1)  | 118 (78 to 154)        | 30.3 (20 to 39.3)   | 10.6 (-13.5 to 39.3)  | 2890 (1900 to 3900)       | 682.8 (456.4 to 904.2)  | 12.7 (-12.8 to 45.4)  |
|                               | Female | 46 (32 to 66)          | 11.1 (7.9 to 16)    | 17.4 (-10.8 to 49.3)  | 47 (33 to 67)          | 11.8 (8.4 to 16.8)  | 16.6 (-11.3 to 47.5)  | 1210 (840 to 1740)        | 280.2 (196.8 to 400.2)  | 19.1 (-10.1 to 54)    |
| Togo                          | Both   | 392 (287 to 523)       | 11.2 (8.3 to 14.7)  | 0.2 (-17.6 to 21.7)   | 400 (294 to 530)       | 11.9 (9 to 15.6)    | 0.4 (-17.1 to 21.5)   | 10800 (7720 to 14500)     | 273.5 (201.1 to 363.3)  | -0.3 (-19.4 to 22.5)  |
|                               | Male   | 275 (194 to 381)       | 19.1 (13.7 to 25.9) | -3.9 (-20.8 to 16.9)  | 279 (197 to 386)       | 20.5 (14.8 to 27.7) | -3.3 (-20 to 17.4)    | 7570 (5220 to 10600)      | 454.2 (322.1 to 625.5)  | -5 (-22.9 to 17.2)    |
|                               | Female | 118 (84 to 152)        | 5.9 (4.3 to 7.5)    | 15.9 (-8.1 to 44.8)   | 121 (86 to 156)        | 6.3 (4.6 to 8)      | 15.8 (-6.7 to 43.9)   | 3220 (2280 to 4220)       | 142.6 (101.7 to 184.9)  | 15 (-10.3 to 46.1)    |

|                     |        |                        |                     |                      |                        |                     |                      |                           |                           |                       |
|---------------------|--------|------------------------|---------------------|----------------------|------------------------|---------------------|----------------------|---------------------------|---------------------------|-----------------------|
| Tokelau             | Both   | 0 (0 to 0)             | 24.4 (19.2 to 31.4) | 3.4 (-13 to 23.8)    | 0 (0 to 0)             | 25.7 (20.3 to 33.1) | 3.1 (-13.4 to 22.9)  | 8 (6 to 10)               | 582.9 (449 to 762.1)      | 1.9 (-15 to 23.6)     |
|                     | Male   | 0 (0 to 0)             | 31 (23.4 to 42.7)   | -3.1 (-19.6 to 16.9) | 0 (0 to 0)             | 32.9 (25 to 45.2)   | -3.5 (-19.7 to 15.9) | 5 (4 to 7)                | 725.7 (531.4 to 1023.9)   | -3.9 (-21.1 to 17.2)  |
|                     | Female | 0 (0 to 0)             | 17.9 (12 to 25.1)   | 10.1 (-11.1 to 36.8) | 0 (0 to 0)             | 18.7 (12.7 to 26.2) | 9.6 (-11.7 to 36)    | 3 (2 to 4)                | 439.9 (288.9 to 619.1)    | 8.6 (-13.5 to 37.1)   |
| Tonga               | Both   | 22 (18 to 26)          | 27.8 (22.8 to 33.5) | 0.1 (-15 to 18.4)    | 23 (19 to 27)          | 29.5 (24.3 to 35.4) | -0.2 (-14.9 to 18.4) | 528 (425 to 647)          | 664.1 (536.7 to 811.6)    | -0.4 (-16.5 to 18.6)  |
|                     | Male   | 17 (13 to 20)          | 46.6 (38 to 56.8)   | -2.3 (-16.9 to 16.8) | 17 (14 to 21)          | 50.2 (41.1 to 60.7) | -2.7 (-16.8 to 15.3) | 406 (323 to 501)          | 1090.1 (877.9 to 1348.2)  | -2.8 (-18.5 to 16.9)  |
|                     | Female | 5 (4 to 7)             | 12.1 (9.1 to 15.8)  | 11.6 (-12.7 to 40.8) | 5 (4 to 7)             | 12.8 (9.7 to 16.6)  | 11.4 (-12.7 to 40.3) | 122 (91 to 160)           | 291.6 (218.2 to 380.9)    | 10.8 (-13.3 to 41.9)  |
| Trinidad and Tobago | Both   | 192 (145 to 250)       | 10.3 (7.8 to 13.4)  | -7.6 (-31.4 to 20.5) | 191 (144 to 248)       | 10.3 (7.8 to 13.4)  | -7.9 (-31.1 to 20.3) | 4740 (3530 to 6240)       | 253.4 (189 to 333.3)      | -8.6 (-32.9 to 21)    |
|                     | Male   | 144 (107 to 190)       | 16 (11.9 to 21)     | -9.6 (-33 to 19)     | 141 (105 to 186)       | 15.9 (11.8 to 20.8) | -9.9 (-32.5 to 18.2) | 3580 (2640 to 4790)       | 389.9 (288.6 to 518.4)    | -10.5 (-34.7 to 19.8) |
|                     | Female | 48 (36 to 63)          | 5 (3.7 to 6.6)      | -1.6 (-27 to 29.8)   | 50 (37 to 65)          | 5.1 (3.8 to 6.7)    | -2.1 (-27 to 28.1)   | 1160 (835 to 1540)        | 122.5 (88.4 to 164.5)     | -2.4 (-28.2 to 31.1)  |
| Tunisia             | Both   | 2460 (1740 to 3390)    | 19.4 (13.9 to 26.5) | -1.1 (-25.3 to 31.6) | 2520 (1800 to 3460)    | 20.2 (14.4 to 27.6) | -2 (-25.8 to 29.6)   | 61900 (43100 to 86300)    | 471.8 (328.9 to 654.3)    | -2.5 (-27.5 to 30.7)  |
|                     | Male   | 2200 (1530 to 3060)    | 35.5 (24.9 to 49.2) | -1.6 (-26.1 to 31.9) | 2270 (1580 to 3150)    | 37.5 (26.5 to 51.5) | -2.1 (-26.3 to 29.8) | 55600 (38400 to 78300)    | 865.2 (600.5 to 1209.8)   | -3 (-28.2 to 31.4)    |
|                     | Female | 266 (193 to 358)       | 4.1 (3 to 5.5)      | 10.1 (-16.3 to 46.1) | 257 (186 to 344)       | 4 (2.9 to 5.4)      | 6.9 (-18.4 to 41)    | 6240 (4480 to 8410)       | 94.1 (67.5 to 126.6)      | 6.6 (-19.5 to 43.7)   |
| Turkey              | Both   | 29500 (23400 to 36800) | 33.1 (26.2 to 41.1) | -3.6 (-25.2 to 25.2) | 29800 (23800 to 37000) | 33.8 (26.9 to 41.8) | -4.3 (-25.4 to 23.3) | 744000 (585000 to 929000) | 814.6 (643.8 to 1017)     | -6.2 (-27.4 to 22.7)  |
|                     | Male   | 24300 (19200 to 30400) | 57.7 (45.6 to 72)   | -6.5 (-27.7 to 21.9) | 24800 (19600 to 31000) | 59.7 (47.3 to 74.1) | -6.7 (-27.7 to 20.8) | 626000 (493000 to 787000) | 1431.9 (1132.2 to 1796.1) | -8.5 (-29.8 to 20)    |
|                     | Female | 5190 (4130 to 6460)    | 11.1 (8.9 to 13.8)  | 11.7 (-12.7 to 43.1) | 5050 (4030 to 6270)    | 10.9 (8.7 to 13.5)  | 8.6 (-15 to 38.5)    | 118000 (93400 to 147000)  | 250.3 (198.4 to 311.9)    | 7.3 (-17 to 39.9)     |
| Turkmenistan        | Both   | 413 (326 to 521)       | 9.9 (7.8 to 12.4)   | 16.3 (-7.6 to 45.7)  | 399 (316 to 504)       | 9.9 (7.8 to 12.2)   | 15.7 (-7.9 to 44.6)  | 11900 (9360 to 15100)     | 265.8 (209.7 to 336.1)    | 14.6 (-9.5 to 45.4)   |
|                     | Male   | 311 (242 to 395)       | 16.6 (13.2 to 20.9) | 14.7 (-9.9 to 44)    | 300 (234 to 380)       | 16.7 (13.3 to 20.9) | 14.1 (-9.8 to 43)    | 9040 (7010 to 11500)      | 438.6 (343.7 to 552.6)    | 13.1 (-11.8 to 44.3)  |
|                     | Female | 102 (79 to 130)        | 4.6 (3.6 to 5.8)    | 18.5 (-6.4 to 48.4)  | 99 (77 to 126)         | 4.6 (3.6 to 5.7)    | 17.4 (-6.8 to 47.1)  | 2880 (2200 to 3720)       | 122.6 (94.5 to 158.1)     | 17.1 (-8.8 to 47.9)   |
| Tuvalu              | Both   | 3 (2 to 4)             | 26 (19.4 to 35)     | 1.6 (-16.5 to 22.4)  | 3 (2 to 4)             | 27.5 (20.7 to 36.8) | 1.5 (-16.8 to 22.2)  | 69 (50 to 95)             | 645.3 (471.1 to 887.8)    | 1.3 (-17.4 to 22.3)   |
|                     | Male   | 2 (1 to 3)             | 38.6 (28.8 to 54.8) | -2 (-19.2 to 18.2)   | 2 (1 to 3)             | 41.2 (30.6 to 58.1) | -2.1 (-19 to 17.6)   | 48 (34 to 69)             | 948 (686.2 to 1361.3)     | -2.3 (-20.3 to 19.1)  |

|                      |        |                        |                     |                      |                        |                     |                      |                           |                         |                      |
|----------------------|--------|------------------------|---------------------|----------------------|------------------------|---------------------|----------------------|---------------------------|-------------------------|----------------------|
|                      | Female | 1 (1 to 1)             | 15.2 (10.7 to 20.6) | 6.2 (-15.2 to 31.1)  | 1 (1 to 1)             | 16 (11.4 to 21.6)   | 6.3 (-15.5 to 31.2)  | 21 (15 to 29)             | 375.2 (263.6 to 520.2)  | 5.3 (-16.6 to 30.8)  |
| Uganda               | Both   | 1010 (801 to 1210)     | 7.3 (6 to 8.7)      | 6.2 (-12.1 to 25.3)  | 1040 (828 to 1240)     | 7.8 (6.4 to 9.2)    | 6.6 (-11.3 to 25.1)  | 27800 (21800 to 34000)    | 182.5 (144.7 to 219.9)  | 6.2 (-13.3 to 27.8)  |
|                      | Male   | 626 (491 to 765)       | 10.8 (8.6 to 12.8)  | -1 (-19 to 18.3)     | 646 (510 to 785)       | 11.6 (9.3 to 13.8)  | -0.3 (-17.9 to 18.6) | 17200 (13200 to 21600)    | 260.6 (204.9 to 317.7)  | -1 (-20.2 to 21)     |
|                      | Female | 381 (287 to 486)       | 4.9 (3.7 to 6.2)    | 23.4 (-5.3 to 57.4)  | 390 (295 to 498)       | 5.1 (3.9 to 6.5)    | 23.1 (-4.9 to 57)    | 10600 (7860 to 13600)     | 122.6 (91.5 to 156.9)   | 23.6 (-7.1 to 58.9)  |
| Ukraine              | Both   | 20100 (16500 to 24400) | 27.2 (22.4 to 33.1) | 13.9 (-6.6 to 37.4)  | 17000 (14100 to 20200) | 22.8 (18.9 to 27)   | 11.7 (-8 to 33.5)    | 452000 (371000 to 539000) | 631.2 (518.4 to 755.2)  | 15.3 (-6.1 to 39.1)  |
|                      | Male   | 16800 (13200 to 20900) | 56.9 (44.9 to 70.8) | 12.6 (-12 to 39.5)   | 14200 (11300 to 17400) | 48.2 (38.5 to 58.8) | 10.5 (-12.2 to 36)   | 383000 (304000 to 469000) | 1289.6 (1025.2 to 1581) | 14.3 (-10 to 42.8)   |
|                      | Female | 3320 (2630 to 4180)    | 7.4 (5.8 to 9.3)    | 10.7 (-13.3 to 39.6) | 2850 (2290 to 3550)    | 6.2 (4.9 to 7.8)    | 8.3 (-13.9 to 36)    | 69100 (54700 to 86600)    | 168.3 (131.7 to 213.1)  | 11.7 (-13 to 42.9)   |
| United Arab Emirates | Both   | 542 (393 to 721)       | 18.6 (13.5 to 25.7) | -18.5 (-37 to 6.3)   | 523 (380 to 697)       | 20.3 (14.7 to 28.2) | -19.5 (-37.9 to 5.9) | 16700 (12100 to 22200)    | 406.5 (295.1 to 559.1)  | -17.3 (-36.4 to 7.1) |
|                      | Male   | 434 (310 to 593)       | 21.5 (15.8 to 29.9) | -15 (-33.3 to 8.9)   | 423 (303 to 580)       | 23.7 (17.4 to 32.9) | -15.4 (-33.5 to 8.7) | 13400 (9530 to 18300)     | 468.7 (343.4 to 645.7)  | -14.7 (-33.2 to 9.1) |
|                      | Female | 108 (72 to 145)        | 12.8 (7.5 to 19.3)  | -30.6 (-57.7 to 9.6) | 100 (66 to 135)        | 13.6 (7.9 to 20.6)  | -33.3 (-59.9 to 7.7) | 3290 (2250 to 4370)       | 274.9 (164.7 to 396.5)  | -28.4 (-54.3 to 7.8) |
| United Kingdom       | Both   | 51500 (43200 to 60700) | 40.2 (33.5 to 47.3) | -3.7 (-19 to 13.3)   | 42800 (39900 to 44800) | 32.8 (30.8 to 34.3) | -4.9 (-7.5 to -2.3)  | 796000 (756000 to 831000) | 666.4 (636.1 to 693.5)  | -7.1 (-9.7 to -4.5)  |
|                      | Male   | 27800 (21900 to 34700) | 47 (36.9 to 58.7)   | -8.2 (-27.1 to 15)   | 23300 (22000 to 24200) | 39.2 (37 to 40.8)   | -9.2 (-11.4 to -7.1) | 438000 (419000 to 453000) | 773.6 (743.3 to 800.4)  | -10.8 (-13 to -8.6)  |
|                      | Female | 23700 (19000 to 29600) | 34.6 (27.6 to 43.6) | 0.7 (-19.1 to 26.6)  | 19600 (17800 to 20900) | 27.7 (25.5 to 29.5) | -0.7 (-5.4 to 4)     | 358000 (333000 to 381000) | 572.6 (538 to 607.2)    | -3 (-7.6 to 1.7)     |
| Tanzania             | Both   | 2130 (1530 to 3070)    | 9 (6.6 to 12.8)     | 6.5 (-12 to 27.1)    | 2220 (1610 to 3190)    | 9.7 (7.1 to 13.6)   | 6.6 (-11.4 to 26.9)  | 56900 (40200 to 83500)    | 221 (158.4 to 320.9)    | 5.7 (-14.8 to 27.7)  |
|                      | Male   | 1530 (1040 to 2380)    | 13.7 (9.5 to 20.9)  | 1.1 (-18 to 22)      | 1600 (1090 to 2470)    | 14.9 (10.4 to 22.4) | 1.2 (-17.9 to 21.9)  | 40300 (26900 to 63400)    | 331.1 (225.3 to 513.5)  | 0.5 (-20.2 to 23.1)  |
|                      | Female | 605 (483 to 737)       | 4.8 (3.8 to 5.7)    | 17.8 (-3.7 to 44.6)  | 622 (499 to 754)       | 5 (4.1 to 6)        | 17.7 (-3.2 to 43.5)  | 16600 (12800 to 20900)    | 119.7 (94.7 to 146.8)   | 17.3 (-6.2 to 46.4)  |
| Virgin Islands       | Both   | 45 (38 to 52)          | 24.1 (20.1 to 27.8) | -4.8 (-18.5 to 8.3)  | 45 (38 to 52)          | 24 (20.3 to 27.6)   | -4.7 (-17.7 to 8)    | 1010 (837 to 1180)        | 552.5 (453.9 to 647.2)  | -4.7 (-19 to 9.5)    |
|                      | Male   | 29 (24 to 35)          | 35.1 (29 to 41.5)   | -4.6 (-18.4 to 11.9) | 29 (24 to 34)          | 34.8 (29.1 to 40.7) | -4.6 (-18.2 to 10.8) | 669 (537 to 801)          | 808.2 (649.4 to 973.6)  | -4.2 (-19.4 to 12.9) |
|                      | Female | 16 (13 to 19)          | 15.2 (12.5 to 18.2) | -2.2 (-19.6 to 15.1) | 16 (13 to 19)          | 15.5 (12.7 to 18.4) | -2 (-19.5 to 14.6)   | 341 (278 to 413)          | 339.9 (273.3 to 413.5)  | -2.6 (-21 to 17.2)   |

|                          |        |                              |                     |                      |                              |                     |                       |                                 |                         |                       |
|--------------------------|--------|------------------------------|---------------------|----------------------|------------------------------|---------------------|-----------------------|---------------------------------|-------------------------|-----------------------|
| United States of America | Both   | 255000<br>(221000 to 294000) | 45.1 (39.1 to 52.2) | -10.3 (-22 to 3.3)   | 206000<br>(194000 to 214000) | 36.1 (34.1 to 37.5) | -9.6 (-12.1 to -7.3)  | 4190000<br>(4000000 to 4330000) | 767.4 (735.2 to 792)    | -11 (-13.6 to -8.5)   |
|                          | Male   | 138000<br>(112000 to 167000) | 53.4 (43.6 to 64.7) | -11.8 (-27.5 to 6.8) | 114000<br>(108000 to 118000) | 44.1 (42.1 to 45.7) | -11.2 (-13.2 to -8.4) | 2350000<br>(2270000 to 2420000) | 922.2 (890.9 to 951.8)  | -12.2 (-14.2 to -9.3) |
|                          | Female | 117000<br>(95900 to 141000)  | 38.3 (31.3 to 46.4) | -9.2 (-25.3 to 9.8)  | 92600<br>(84700 to 98900)    | 29.6 (27.3 to 31.5) | -8.5 (-13.1 to -4.3)  | 1840000<br>(1720000 to 1950000) | 633.8 (595.3 to 669.9)  | -9.8 (-14.4 to -5.4)  |
| Uruguay                  | Both   | 1750 (1380 to 2190)          | 34.1 (26.6 to 42.9) | -4.4 (-25.8 to 20.3) | 1750 (1640 to 1860)          | 33.5 (31.3 to 35.5) | -5.1 (-11.4 to 1)     | 39500 (36800 to 42000)          | 813.1 (755.2 to 866.3)  | -6.3 (-13.2 to 0.6)   |
|                          | Male   | 1290 (1000 to 1610)          | 57.7 (45 to 72.4)   | -10 (-30.3 to 13)    | 1290 (1200 to 1380)          | 57.4 (53.5 to 61.2) | -10.6 (-17.2 to -4.2) | 29400 (27300 to 31400)          | 1344.7 (1252 to 1437)   | -11.6 (-18.2 to -5.1) |
|                          | Female | 461 (365 to 581)             | 16 (12.6 to 20.2)   | 15.2 (-9.9 to 47.1)  | 463 (417 to 507)             | 15.4 (14 to 16.8)   | 13.8 (3.5 to 25.1)    | 10200 (9290 to 11100)           | 383.4 (350.8 to 419.6)  | 12 (1.3 to 22.5)      |
| Uzbekistan               | Both   | 2770 (2280 to 3320)          | 12.7 (10.7 to 14.9) | 7.7 (-9.7 to 27)     | 2660 (2190 to 3180)          | 12.9 (11 to 15.2)   | 6.9 (-9.9 to 25.6)    | 80600 (66300 to 96800)          | 320.9 (266.5 to 380.7)  | 6.8 (-11.2 to 27.1)   |
|                          | Male   | 1990 (1620 to 2420)          | 20.5 (17 to 24.3)   | 4.2 (-13.8 to 24.1)  | 1910 (1560 to 2320)          | 21 (17.5 to 24.9)   | 3.2 (-14.5 to 22.7)   | 57800 (47000 to 70200)          | 510.3 (421.6 to 610.4)  | 4 (-14.8 to 25.6)     |
|                          | Female | 779 (638 to 942)             | 6.7 (5.6 to 8)      | 15.8 (-4 to 39.2)    | 744 (612 to 898)             | 6.9 (5.7 to 8.1)    | 14.3 (-5 to 36.8)     | 22700 (18500 to 27600)          | 169.5 (140.4 to 203.1)  | 14.9 (-5.7 to 38.9)   |
| Vanuatu                  | Both   | 42 (28 to 63)                | 24.7 (16.4 to 36.3) | 4.1 (-11.4 to 24.7)  | 43 (29 to 64)                | 26.4 (17.5 to 38.6) | 3.8 (-11.8 to 24.2)   | 1130 (741 to 1700)              | 615.5 (407 to 925.7)    | 4.1 (-12.2 to 26.3)   |
|                          | Male   | 34 (20 to 53)                | 38.1 (23 to 59.2)   | 2.2 (-12.6 to 22.3)  | 35 (21 to 54)                | 40.7 (24.6 to 62.8) | 2 (-12.7 to 21.8)     | 911 (549 to 1460)               | 948.7 (572.2 to 1517.7) | 2 (-13.4 to 23.2)     |
|                          | Female | 8 (5 to 12)                  | 10 (6.6 to 14.3)    | 12.1 (-9.8 to 38.9)  | 8 (5 to 12)                  | 10.7 (7.1 to 15.3)  | 11.8 (-9.7 to 38.9)   | 220 (138 to 320)                | 250.8 (161.3 to 362.7)  | 11.6 (-10.7 to 39.2)  |
| Venezuela                | Both   | 5770 (4260 to 7450)          | 19.8 (14.7 to 25.4) | -1.9 (-26.3 to 25.9) | 5660 (4210 to 7250)          | 19.6 (14.7 to 25.1) | -2.5 (-26.6 to 25.2)  | 138000<br>(102000 to 180000)    | 460.1 (338.3 to 594.7)  | -2.9 (-27.7 to 26.2)  |
|                          | Male   | 3500 (2590 to 4520)          | 25.7 (19.2 to 33.1) | -5.8 (-29.8 to 22.3) | 3520 (2620 to 4550)          | 26.3 (19.7 to 33.9) | -6.2 (-29.8 to 21.6)  | 86700 (63500 to 113000)         | 609.3 (450.4 to 790.9)  | -6.1 (-30.8 to 22.9)  |
|                          | Female | 2270 (1630 to 3110)          | 14.6 (10.6 to 20)   | 3.5 (-25.2 to 41.2)  | 2140 (1550 to 2930)          | 13.9 (10.1 to 18.9) | 2.7 (-25.6 to 39.7)   | 51500 (36800 to 71100)          | 327.2 (233.8 to 452.3)  | 2 (-26.9 to 41.3)     |
| Vietnam                  | Both   | 25600<br>(19700 to 32400)    | 26.7 (20.8 to 33.5) | 7.6 (-13 to 29.7)    | 25200<br>(19500 to 31700)    | 27 (21.1 to 33.6)   | 6.2 (-13.7 to 27.6)   | 677000<br>(515000 to 874000)    | 668.8 (512 to 853.2)    | 4.6 (-16.1 to 27.7)   |
|                          | Male   | 18500<br>(14100 to 23700)    | 44.8 (34.8 to 56.2) | 5 (-15.2 to 27.6)    | 18200<br>(13900 to 23000)    | 45.8 (35.8 to 57)   | 3.9 (-15.6 to 25)     | 499000<br>(375000 to 644000)    | 1102.4 (838 to 1402.6)  | 2.1 (-18.8 to 26)     |
|                          | Female | 7020 (5270 to 9140)          | 13.3 (10 to 17.2)   | 12.5 (-12 to 40.6)   | 7010 (5290 to 9120)          | 13.5 (10.2 to 17.4) | 10.9 (-12.6 to 37.9)  | 178000<br>(133000 to 235000)    | 325.3 (245.2 to 426.6)  | 8.9 (-15.3 to 36.8)   |



|          |        |                    |                     |                      |                    |                     |                      |                        |                        |                      |
|----------|--------|--------------------|---------------------|----------------------|--------------------|---------------------|----------------------|------------------------|------------------------|----------------------|
| Yemen    | Both   | 1300 (885 to 1930) | 9.9 (6.8 to 14.7)   | -1.8 (-21.3 to 21.5) | 1340 (912 to 1970) | 10.6 (7.3 to 15.6)  | -1.8 (-21.4 to 21)   | 36200 (24400 to 53800) | 248.8 (169.3 to 368.9) | -1.9 (-21.3 to 21.9) |
|          | Male   | 1010 (658 to 1600) | 15.9 (10.4 to 24.9) | -3.1 (-23.8 to 21.4) | 1050 (681 to 1640) | 17.1 (11.2 to 26.7) | -3.2 (-23.7 to 21.3) | 27700 (18000 to 44300) | 393.9 (254.6 to 622.7) | -2.9 (-23.8 to 22)   |
|          | Female | 289 (212 to 391)   | 4.2 (3.1 to 5.6)    | 8.6 (-20.7 to 36)    | 289 (214 to 390)   | 4.3 (3.3 to 5.8)    | 8.2 (-21.4 to 35)    | 8460 (5990 to 11600)   | 107.4 (78.7 to 145.4)  | 8.7 (-19.9 to 38.2)  |
| Zambia   | Both   | 699 (500 to 911)   | 10.7 (7.9 to 13.8)  | 0.9 (-20.1 to 27.1)  | 717 (517 to 929)   | 11.4 (8.5 to 14.6)  | 0 (-19.5 to 24.7)    | 19700 (14000 to 26100) | 270 (192.9 to 353.1)   | 0.1 (-22 to 27)      |
|          | Male   | 484 (316 to 659)   | 16 (10.8 to 21.4)   | -3.2 (-24.3 to 24.8) | 499 (329 to 675)   | 17.2 (11.8 to 22.7) | -3.9 (-24.5 to 22.6) | 13500 (8830 to 18800)  | 394.9 (259.9 to 535.2) | -4.7 (-26.9 to 24.4) |
|          | Female | 215 (153 to 294)   | 6.1 (4.4 to 8.3)    | 17.5 (-9.2 to 52.3)  | 218 (156 to 297)   | 6.5 (4.8 to 8.8)    | 17.2 (-9.7 to 52.1)  | 6220 (4270 to 8620)    | 157.8 (111.2 to 215.9) | 15.8 (-12.3 to 52.2) |
| Zimbabwe | Both   | 1020 (786 to 1250) | 14.5 (11.3 to 17.5) | 0.7 (-16.7 to 19.5)  | 1030 (792 to 1250) | 15.1 (11.8 to 18.2) | 1.6 (-15.8 to 20.7)  | 28800 (21800 to 35900) | 372.2 (284.7 to 455.6) | 0.6 (-18.3 to 21.4)  |
|          | Male   | 572 (451 to 699)   | 19.3 (15.6 to 23.2) | 0.3 (-19.2 to 22.2)  | 581 (458 to 706)   | 20.4 (16.5 to 24.3) | -1.6 (-20.3 to 19.6) | 16700 (12900 to 20900) | 504.3 (396.1 to 614.6) | -2.9 (-23 to 20.1)   |
|          | Female | 452 (321 to 591)   | 11.2 (7.9 to 14.5)  | 2.8 (-22.1 to 35.6)  | 445 (313 to 584)   | 11.4 (8.1 to 14.8)  | 8.2 (-18.4 to 44.2)  | 12100 (8470 to 15900)  | 275.5 (192.9 to 367.2) | 7.8 (-19.5 to 45.3)  |

**Table S2. Incidence, deaths, and disability-adjusted life-years (DALYs) in 2019 (counts and age-standardised rates) and percent change in age-standardised rates between 2010 and 2019, at global, regional, national levels, and Socio-demographic Index (SDI) quintiles, by sex and for both sexes combined, for larynx cancer.**

95% UIs given in parentheses.

| Location        | Sex    | Incidence                    |                                           |                                                               | Deaths                       |                                           |                                                               | DALYs                           |                                           |                                                               |
|-----------------|--------|------------------------------|-------------------------------------------|---------------------------------------------------------------|------------------------------|-------------------------------------------|---------------------------------------------------------------|---------------------------------|-------------------------------------------|---------------------------------------------------------------|
|                 |        | Number in 2019               | Age-standardised rate per 100,000 in 2019 | Percent change in age-standardised rate from 2010 to 2019 (%) | Number in 2019               | Age-standardised rate per 100,000 in 2019 | Percent change in age-standardised rate from 2010 to 2019 (%) | Number in 2019                  | Age-standardised rate per 100,000 in 2019 | Percent change in age-standardised rate from 2010 to 2019 (%) |
| Global          | Both   | 209000<br>(194000 to 225000) | 2.5 (2.3 to 2.7)                          | -2.5 (-9.3 to 4.8)                                            | 123000<br>(115000 to 133000) | 1.5 (1.4 to 1.6)                          | -8.5 (-14.3 to -2.3)                                          | 3260000<br>(3030000 to 3510000) | 38.8 (36.1 to 41.8)                       | -9.3 (-15.3 to -2.9)                                          |
|                 | Male   | 181000<br>(166000 to 196000) | 4.6 (4.2 to 5)                            | -3 (-10.5 to 5)                                               | 106000<br>(97800 to 115000)  | 2.7 (2.5 to 3)                            | -9.3 (-15.9 to -2.8)                                          | 2800000<br>(2590000 to 3030000) | 69.3 (64.1 to 75.2)                       | -10 (-16.9 to -3.2)                                           |
|                 | Female | 28500<br>(26100 to 31300)    | 0.7 (0.6 to 0.7)                          | -0.5 (-8.4 to 8.1)                                            | 17800<br>(16200 to 19700)    | 0.4 (0.4 to 0.5)                          | -4.9 (-12.8 to 4.1)                                           | 464000<br>(421000 to 512000)    | 10.7 (9.7 to 11.8)                        | -5.2 (-13.3 to 4)                                             |
| High SDI        | Both   | 43700<br>(39300 to 48500)    | 2.5 (2.2 to 2.8)                          | -5.5 (-15 to 5)                                               | 14600<br>(13700 to 15300)    | 0.8 (0.7 to 0.8)                          | -8.9 (-11.8 to -5.6)                                          | 342000<br>(324000 to 359000)    | 20.1 (19.1 to 21.2)                       | -10.3 (-13.6 to -6.5)                                         |
|                 | Male   | 37500<br>(33500 to 41900)    | 4.5 (4 to 5)                              | -6.9 (-16.9 to 4.1)                                           | 12400<br>(11700 to 12900)    | 1.5 (1.4 to 1.5)                          | -10.7 (-14.1 to -7.2)                                         | 290000<br>(274000 to 305000)    | 35.6 (33.7 to 37.5)                       | -11.8 (-15.4 to -7.7)                                         |
|                 | Female | 6230<br>(5390 to 7140)       | 0.7 (0.6 to 0.8)                          | -4.4 (-14.9 to 7.2)                                           | 2280<br>(2030 to 2490)       | 0.2 (0.2 to 0.2)                          | -7.5 (-11.1 to -2.9)                                          | 52100<br>(47300 to 56800)       | 6 (5.5 to 6.5)                            | -7.8 (-11.8 to -2.9)                                          |
| High-middle SDI | Both   | 57800<br>(52500 to 63500)    | 2.8 (2.5 to 3.1)                          | -7.8 (-16.1 to 1.2)                                           | 30400<br>(28200 to 32500)    | 1.5 (1.4 to 1.6)                          | -16.9 (-22.7 to -11.4)                                        | 780000<br>(723000 to 836000)    | 38 (35.2 to 40.7)                         | -18.3 (-24.2 to -12.5)                                        |
|                 | Male   | 51900<br>(46800 to 57200)    | 5.4 (4.9 to 6)                            | -9.3 (-17.9 to 0)                                             | 27200<br>(25100 to 29200)    | 2.9 (2.7 to 3.2)                          | -18.4 (-24.5 to -12.7)                                        | 703000<br>(649000 to 756000)    | 72.9 (67.4 to 78.4)                       | -19.5 (-25.7 to -13.5)                                        |
|                 | Female | 5990<br>(5360 to 6730)       | 0.5 (0.5 to 0.6)                          | -3.3 (-12.8 to 8.8)                                           | 3250<br>(2940 to 3600)       | 0.3 (0.3 to 0.3)                          | -11.9 (-19.5 to -2.8)                                         | 77800<br>(70800 to 85900)       | 7.3 (6.6 to 8)                            | -12.9 (-20.6 to -4)                                           |

|                |        |                           |                   |                       |                           |                  |                       |                               |                        |                        |
|----------------|--------|---------------------------|-------------------|-----------------------|---------------------------|------------------|-----------------------|-------------------------------|------------------------|------------------------|
| Middle SDI     | Both   | 51400<br>(46600 to 56800) | 2 (1.8 to 2.2)    | 3.7 (-6 to 14.6)      | 34900<br>(31600 to 38200) | 1.4 (1.3 to 1.6) | -7.8 (-15.7 to 0.2)   | 912000<br>(829000 to 1000000) | 34.7 (31.5 to 38.1)    | -8.5 (-16.5 to -0.3)   |
|                | Male   | 43200<br>(38700 to 48300) | 3.5 (3.2 to 3.9)  | 5.2 (-5.8 to 18.4)    | 29500<br>(26500 to 32600) | 2.5 (2.3 to 2.8) | -6.5 (-15.6 to 2.8)   | 777000<br>(699000 to 860000)  | 61.1 (55.2 to 67.5)    | -7.2 (-16.7 to 2.3)    |
|                | Female | 8260<br>(7280 to 9360)    | 0.6 (0.6 to 0.7)  | 0.5 (-11.3 to 12.4)   | 5380<br>(4820 to 6070)    | 0.4 (0.4 to 0.5) | -10.2 (-19.8 to 0.1)  | 135000<br>(121000 to 151000)  | 10.1 (9.1 to 11.3)     | -10.9 (-20.4 to -0.6)  |
| Low-middle SDI | Both   | 37600<br>(33500 to 42100) | 2.7 (2.4 to 3)    | 0.5 (-10.3 to 13.1)   | 32100<br>(28700 to 36200) | 2.3 (2.1 to 2.6) | -4.5 (-14.8 to 7)     | 900000<br>(801000 to 1020000) | 61.3 (54.6 to 69.4)    | -5.2 (-16 to 7.3)      |
|                | Male   | 31700<br>(27800 to 36100) | 4.7 (4.1 to 5.3)  | 0.8 (-11.8 to 15.2)   | 27100<br>(23800 to 31000) | 4.1 (3.7 to 4.7) | -4 (-15.8 to 9)       | 759000<br>(662000 to 868000)  | 106.8 (93.4 to 122)    | -5.1 (-17.5 to 8.8)    |
|                | Female | 5890<br>(5110 to 6810)    | 0.8 (0.7 to 0.9)  | 5.6 (-7.3 to 22.5)    | 4970<br>(4260 to 5780)    | 0.7 (0.6 to 0.8) | 0.2 (-12.5 to 15.6)   | 141000<br>(120000 to 165000)  | 18.6 (15.8 to 21.7)    | 0.4 (-13 to 16.8)      |
| Low SDI        | Both   | 11200<br>(9760 to 12700)  | 2.1 (1.8 to 2.3)  | -4.5 (-15.9 to 8.7)   | 11200<br>(9790 to 12800)  | 2.2 (1.9 to 2.5) | -7.4 (-17.7 to 5)     | 326000<br>(285000 to 376000)  | 56.3 (49.2 to 64.6)    | -8.7 (-19.7 to 4.3)    |
|                | Male   | 9020<br>(7670 to 10500)   | 3.4 (2.9 to 4)    | -4.8 (-18.1 to 11.4)  | 9320<br>(7970 to 11000)   | 3.7 (3.2 to 4.3) | -7.6 (-20 to 6.8)     | 268000<br>(228000 to 319000)  | 94.5 (80.7 to 111.4)   | -8.8 (-21.7 to 6.6)    |
|                | Female | 2150<br>(1850 to 2450)    | 0.8 (0.7 to 0.9)  | -1.1 (-12.9 to 13.7)  | 1910<br>(1640 to 2210)    | 0.7 (0.6 to 0.8) | -3.6 (-14.7 to 10.3)  | 57900<br>(49600 to 66900)     | 19.1 (16.5 to 22.1)    | -5.7 (-17.4 to 8.9)    |
| Central Asia   | Both   | 1790<br>(1610 to 2010)    | 2.2 (2 to 2.5)    | -16.1 (-24.4 to -6.8) | 1340<br>(1200 to 1510)    | 1.8 (1.6 to 2)   | -20.5 (-28 to -12)    | 39100<br>(34900 to 44100)     | 46.7 (41.8 to 52.4)    | -21.9 (-29.7 to -12.8) |
|                | Male   | 1430<br>(1270 to 1630)    | 4.2 (3.7 to 4.7)  | -14.9 (-23.2 to -5)   | 1080 (964 to 1220)        | 3.4 (3 to 3.8)   | -19 (-26.8 to -9.8)   | 31000<br>(27600 to 35200)     | 84.5 (75.2 to 95.8)    | -20.9 (-28.7 to -11.4) |
|                | Female | 362 (309 to 428)          | 0.8 (0.7 to 1)    | -19.2 (-31 to -2.7)   | 259 (222 to 305)          | 0.6 (0.5 to 0.7) | -24.2 (-34.8 to -9.8) | 8060 (6860 to 9540)           | 17.4 (14.8 to 20.5)    | -24.6 (-35.9 to -9.1)  |
| Central Europe | Both   | 9160<br>(7920 to 10400)   | 4.7 (4 to 5.3)    | -6.7 (-19.3 to 6.7)   | 5260<br>(4550 to 5990)    | 2.6 (2.2 to 2.9) | -13.4 (-25.2 to -1.6) | 138000<br>(119000 to 157000)  | 71.8 (61.8 to 81.8)    | -14.8 (-26.9 to -3)    |
|                | Male   | 8260<br>(7130 to 9430)    | 9.1 (7.8 to 10.4) | -8.5 (-21.2 to 4.6)   | 4780<br>(4130 to 5470)    | 5.2 (4.5 to 6)   | -14.8 (-26.7 to -2.9) | 126000<br>(108000 to 145000)  | 140.5 (120.6 to 161.2) | -16.2 (-28.2 to -4.2)  |

|                           |        |                        |                  |                      |                     |                  |                        |                           |                        |                        |
|---------------------------|--------|------------------------|------------------|----------------------|---------------------|------------------|------------------------|---------------------------|------------------------|------------------------|
|                           | Female | 902 (750 to 1050)      | 0.9 (0.7 to 1)   | -2.7 (-15.8 to 13.6) | 482 (403 to 560)    | 0.4 (0.3 to 0.5) | -10.8 (-22.2 to 3)     | 11900 (9760 to 13900)     | 11.6 (9.6 to 13.7)     | -11.6 (-23.1 to 2.6)   |
| Eastern Europe            | Both   | 11000 (9480 to 12600)  | 3.3 (2.8 to 3.8) | -7.3 (-19.9 to 6.7)  | 6560 (5650 to 7480) | 1.9 (1.7 to 2.2) | -16.5 (-27.6 to -4.6)  | 185000 (160000 to 212000) | 56.3 (48.7 to 64.4)    | -16.3 (-27.4 to -4.6)  |
|                           | Male   | 10400 (8910 to 11900)  | 7.5 (6.4 to 8.6) | -10 (-22.5 to 4.2)   | 6210 (5320 to 7140) | 4.6 (3.9 to 5.2) | -18.7 (-29.8 to -6.9)  | 176000 (151000 to 202000) | 126.8 (109.2 to 145.8) | -18.4 (-29.6 to -6.5)  |
|                           | Female | 607 (514 to 727)       | 0.3 (0.3 to 0.4) | 2.1 (-13.2 to 21.1)  | 351 (301 to 415)    | 0.2 (0.1 to 0.2) | -10.3 (-22.9 to 7.1)   | 9100 (7750 to 10900)      | 5 (4.2 to 6)           | -8.9 (-22.2 to 9.3)    |
| Australasia               | Both   | 897 (706 to 1130)      | 1.9 (1.5 to 2.4) | -8.6 (-28.3 to 15.6) | 293 (267 to 321)    | 0.6 (0.5 to 0.6) | -13.1 (-20.6 to -5.1)  | 6540 (5910 to 7160)       | 14.1 (12.8 to 15.4)    | -13.3 (-21.1 to -5.1)  |
|                           | Male   | 775 (607 to 984)       | 3.4 (2.7 to 4.4) | -9.2 (-29 to 16.1)   | 253 (228 to 280)    | 1.1 (1 to 1.2)   | -14.2 (-22.6 to -5.6)  | 5630 (5040 to 6220)       | 25.4 (22.8 to 28)      | -13.6 (-22.4 to -4.3)  |
|                           | Female | 122 (92 to 161)        | 0.5 (0.4 to 0.7) | -6.3 (-28.5 to 20.5) | 40 (34 to 46)       | 0.2 (0.1 to 0.2) | -11.6 (-22.3 to 0.1)   | 905 (773 to 1060)         | 3.8 (3.3 to 4.5)       | -11 (-21.8 to 1)       |
| High-income Asia Pacific  | Both   | 7040 (6040 to 8190)    | 1.7 (1.5 to 2)   | -8.3 (-20.6 to 6)    | 1770 (1570 to 1910) | 0.4 (0.3 to 0.4) | -12.9 (-17.2 to -7.8)  | 35000 (31800 to 38400)    | 8.6 (7.9 to 9.5)       | -14.1 (-18.8 to -8.3)  |
|                           | Male   | 6320 (5370 to 7410)    | 3.3 (2.8 to 3.8) | -10.6 (-23.7 to 4.6) | 1560 (1410 to 1690) | 0.7 (0.7 to 0.8) | -15.5 (-19.9 to -10.4) | 31100 (28400 to 33900)    | 16.3 (14.9 to 17.9)    | -16.1 (-21.3 to -10.3) |
|                           | Female | 725 (584 to 884)       | 0.3 (0.3 to 0.4) | -6.5 (-20.8 to 10.3) | 202 (163 to 234)    | 0.1 (0.1 to 0.1) | -13.7 (-18.6 to -7.5)  | 3910 (3380 to 4500)       | 2 (1.8 to 2.2)         | -12.8 (-18 to -6.4)    |
| High-income North America | Both   | 17700 (14900 to 21000) | 2.9 (2.4 to 3.5) | -5.3 (-20.6 to 12.5) | 5440 (5160 to 5680) | 0.9 (0.8 to 0.9) | -5.3 (-8.2 to -2)      | 129000 (123000 to 135000) | 21.6 (20.6 to 22.6)    | -7.2 (-10.3 to -3.6)   |
|                           | Male   | 14800 (12200 to 18000) | 5.2 (4.3 to 6.3) | -5.5 (-22.1 to 14.5) | 4380 (4150 to 4580) | 1.5 (1.4 to 1.6) | -5.5 (-9 to -1.8)      | 104000 (98600 to 109000)  | 36.9 (35 to 38.7)      | -7.1 (-10.7 to -3.3)   |
|                           | Female | 2920 (2420 to 3570)    | 0.9 (0.7 to 1.1) | -8.3 (-23.3 to 11.1) | 1070 (974 to 1170)  | 0.3 (0.3 to 0.3) | -8.9 (-13 to -4.1)     | 25000 (23200 to 27400)    | 8.1 (7.5 to 8.8)       | -9.6 (-13.9 to -4.5)   |
| Southern Latin America    | Both   | 2160 (1680 to 2720)    | 2.6 (2 to 3.3)   | -6.7 (-27.3 to 18.2) | 1370 (1270 to 1480) | 1.6 (1.5 to 1.8) | -13.4 (-19.6 to -6)    | 32900 (30500 to 35700)    | 40.4 (37.5 to 43.9)    | -14.8 (-21.6 to -7.3)  |
|                           | Male   | 1880 (1450 to 2380)    | 5.1 (3.9 to 6.4) | -7.9 (-28.7 to 17.9) | 1190 (1100 to 1290) | 3.2 (3 to 3.5)   | -14.4 (-21.3 to -6.5)  | 28800 (26600 to 31600)    | 77.4 (71.4 to 84.5)    | -15.8 (-23.1 to -7.6)  |
|                           | Female | 278 (218 to 354)       | 0.6 (0.5 to 0.8) | -0.8 (-22.4 to 25.2) | 180 (158 to 200)    | 0.4 (0.3 to 0.4) | -8.1 (-17.7 to 2.5)    | 4050 (3580 to 4510)       | 9.2 (8.1 to 10.2)      | -9.1 (-19.1 to 1.4)    |

|                        |        |                           |                  |                      |                         |                  |                        |                              |                        |                        |
|------------------------|--------|---------------------------|------------------|----------------------|-------------------------|------------------|------------------------|------------------------------|------------------------|------------------------|
| Western Europe         | Both   | 24200<br>(20900 to 28000) | 3 (2.6 to 3.5)   | -8.8 (-22.3 to 6.7)  | 9690<br>(9050 to 10200) | 1.1 (1 to 1.2)   | -13.4 (-16.9 to -9.6)  | 220000<br>(207000 to 232000) | 28.2 (26.7 to 29.7)    | -15.3 (-19.4 to -10.9) |
|                        | Male   | 21200<br>(18000 to 24700) | 5.6 (4.7 to 6.6) | -10.7 (-24.3 to 5.2) | 8510<br>(8010 to 8950)  | 2.1 (2 to 2.2)   | -15.7 (-19.5 to -11.8) | 194000<br>(183000 to 204000) | 52.1 (49.2 to 55)      | -17.1 (-21.3 to -12.4) |
|                        | Female | 2960<br>(2400 to 3480)    | 0.7 (0.6 to 0.8) | -1.2 (-14.7 to 13.2) | 1180 (943 to 1310)      | 0.2 (0.2 to 0.3) | -6.1 (-11.1 to 0.3)    | 26000<br>(20800 to 28800)    | 6.5 (5.3 to 7.2)       | -6.6 (-11.9 to 0.6)    |
| Andean Latin America   | Both   | 481 (391 to 590)          | 0.9 (0.7 to 1.1) | -4.1 (-22.6 to 16.7) | 398 (325 to 484)        | 0.7 (0.6 to 0.9) | -9.9 (-27.1 to 9.1)    | 8830 (7100 to 10900)         | 15.6 (12.6 to 19.2)    | -12 (-29.2 to 6.9)     |
|                        | Male   | 382 (307 to 472)          | 1.5 (1.2 to 1.8) | -2.9 (-22.8 to 19.4) | 320 (260 to 393)        | 1.2 (1 to 1.5)   | -8.6 (-26.7 to 11.5)   | 6940 (5550 to 8610)          | 25.8 (20.7 to 31.9)    | -10.5 (-29 to 9.5)     |
|                        | Female | 99 (81 to 122)            | 0.3 (0.3 to 0.4) | -6.7 (-24.5 to 14.2) | 78 (64 to 95)           | 0.3 (0.2 to 0.3) | -13 (-28.5 to 5.3)     | 1880 (1520 to 2330)          | 6.3 (5.1 to 7.8)       | -15.5 (-31.9 to 4.3)   |
| Caribbean              | Both   | 2340<br>(1980 to 2770)    | 4.5 (3.8 to 5.3) | 6.1 (-10.6 to 25.9)  | 1550<br>(1320 to 1790)  | 3 (2.5 to 3.4)   | 1 (-14 to 17.2)        | 37800<br>(32100 to 44100)    | 72.5 (61.5 to 84.3)    | 1.2 (-14.3 to 18.2)    |
|                        | Male   | 2050<br>(1720 to 2430)    | 8.3 (7 to 9.9)   | 7.7 (-9.9 to 28.1)   | 1350<br>(1150 to 1570)  | 5.6 (4.7 to 6.5) | 2.4 (-12.8 to 19.3)    | 33200<br>(28100 to 38900)    | 133.8 (113.3 to 156.1) | 2.7 (-13.5 to 20.4)    |
|                        | Female | 295 (247 to 354)          | 1.1 (0.9 to 1.3) | 0.8 (-15.2 to 19.9)  | 198 (168 to 233)        | 0.7 (0.6 to 0.8) | -3.8 (-17.6 to 11.9)   | 4580 (3920 to 5420)          | 16.8 (14.4 to 19.9)    | -3.8 (-18.1 to 13.3)   |
| Central Latin America  | Both   | 3620<br>(3020 to 4290)    | 1.5 (1.3 to 1.8) | -4.4 (-19.5 to 12.1) | 2660<br>(2250 to 3130)  | 1.2 (1 to 1.4)   | -9.5 (-23 to 6)        | 61700<br>(51800 to 73400)    | 25.8 (21.8 to 30.7)    | -9.4 (-24 to 7.2)      |
|                        | Male   | 3030<br>(2500 to 3610)    | 2.8 (2.3 to 3.3) | -3.4 (-19.5 to 13.8) | 2220<br>(1850 to 2630)  | 2.1 (1.8 to 2.5) | -8.4 (-23.1 to 7.7)    | 51600<br>(43000 to 61800)    | 46.8 (39 to 55.9)      | -8.5 (-24.1 to 9.1)    |
|                        | Female | 597 (493 to 760)          | 0.5 (0.4 to 0.6) | -4 (-19.1 to 12.5)   | 441 (370 to 557)        | 0.4 (0.3 to 0.4) | -9.4 (-23.1 to 5.4)    | 10000<br>(8380 to 13200)     | 7.8 (6.5 to 10.3)      | -9.2 (-23.3 to 6.3)    |
| Tropical Latin America | Both   | 7790<br>(7350 to 8220)    | 3.1 (3 to 3.3)   | -8.4 (-13.4 to -3.5) | 5540<br>(5220 to 5810)  | 2.3 (2.1 to 2.4) | -12.8 (-17.1 to -8.2)  | 149000<br>(141000 to 156000) | 59.1 (56 to 62.1)      | -14.2 (-18.7 to -9.4)  |
|                        | Male   | 6780<br>(6350 to 7210)    | 6 (5.6 to 6.3)   | -8.4 (-13.9 to -2.7) | 4800<br>(4510 to 5070)  | 4.3 (4 to 4.6)   | -12.8 (-17.7 to -7.6)  | 131000<br>(123000 to 138000) | 112 (105.5 to 118.2)   | -14.2 (-19.2 to -8.9)  |
|                        | Female | 1010 (906 to 1120)        | 0.8 (0.7 to 0.8) | -6.3 (-13 to 2.5)    | 733 (649 to 811)        | 0.5 (0.5 to 0.6) | -10.9 (-17 to -3)      | 18200<br>(16600 to 20200)    | 13.6 (12.4 to 15)      | -12.6 (-18.9 to -4.3)  |

|                              |        |                           |                  |                      |                           |                  |                       |                                |                        |                       |
|------------------------------|--------|---------------------------|------------------|----------------------|---------------------------|------------------|-----------------------|--------------------------------|------------------------|-----------------------|
| North Africa and Middle East | Both   | 11200<br>(10100 to 12600) | 2.5 (2.3 to 2.8) | 1.8 (-6 to 11.8)     | 7640<br>(6860 to 8590)    | 1.8 (1.6 to 2)   | -7.2 (-13.8 to 1.1)   | 209000<br>(184000 to 237000)   | 44.3 (39.5 to 50)      | -8.3 (-15.6 to -0.2)  |
|                              | Male   | 9450<br>(8450 to 10700)   | 4.2 (3.8 to 4.7) | -0.1 (-8.7 to 10.4)  | 6440<br>(5760 to 7300)    | 3 (2.7 to 3.4)   | -8.7 (-15.7 to -0.1)  | 174000<br>(153000 to 200000)   | 72.8 (64.8 to 82.6)    | -9.9 (-17.3 to -1)    |
|                              | Female | 1800<br>(1610 to 2020)    | 0.8 (0.7 to 0.9) | 11.1 (3.3 to 21.2)   | 1200<br>(1070 to 1350)    | 0.6 (0.5 to 0.6) | 0.4 (-6.6 to 9.3)     | 34700<br>(30400 to 40000)      | 14.6 (12.9 to 16.5)    | -1.5 (-9.3 to 8.3)    |
| South Asia                   | Both   | 46200<br>(39900 to 53600) | 3.2 (2.7 to 3.7) | -3.2 (-17.1 to 13)   | 39900<br>(34400 to 46300) | 2.8 (2.4 to 3.2) | -7.7 (-20.4 to 7.2)   | 1130000<br>(979000 to 1320000) | 74.7 (64.4 to 86.6)    | -8.2 (-21.3 to 7)     |
|                              | Male   | 39200<br>(33300 to 46400) | 5.4 (4.6 to 6.4) | -3.8 (-19.7 to 14.3) | 33800<br>(28500 to 40000) | 4.9 (4.1 to 5.7) | -8.1 (-22.6 to 8.4)   | 958000<br>(806000 to 1140000)  | 127.3 (107.1 to 151.6) | -8.7 (-23.5 to 8.6)   |
|                              | Female | 7060<br>(5880 to 8400)    | 0.9 (0.8 to 1.1) | 6.7 (-10.1 to 28.6)  | 6020<br>(5030 to 7210)    | 0.8 (0.7 to 1)   | 1.5 (-15.2 to 21.7)   | 176000<br>(147000 to 211000)   | 22.8 (19 to 27.3)      | 1.1 (-16 to 21.4)     |
| East Asia                    | Both   | 46600<br>(37800 to 56600) | 2.2 (1.8 to 2.6) | 11.6 (-8.4 to 38.3)  | 20900<br>(17400 to 24800) | 1 (0.8 to 1.2)   | -8.6 (-24.5 to 10)    | 514000<br>(428000 to 615000)   | 23.8 (19.9 to 28.3)    | -8.7 (-24.9 to 10.9)  |
|                              | Male   | 40000<br>(31500 to 49800) | 3.9 (3.1 to 4.8) | 14.8 (-8.3 to 45.8)  | 17400<br>(14000 to 21200) | 1.8 (1.5 to 2.2) | -6.4 (-24.7 to 14.4)  | 435000<br>(351000 to 534000)   | 41.5 (33.7 to 50.7)    | -6 (-25.1 to 15.4)    |
|                              | Female | 6580<br>(5250 to 7980)    | 0.6 (0.5 to 0.7) | -2.1 (-21.3 to 20.8) | 3500<br>(2820 to 4210)    | 0.3 (0.3 to 0.4) | -16.8 (-33.7 to 1.2)  | 78400<br>(63600 to 94600)      | 7.3 (5.9 to 8.8)       | -18 (-35 to -0.2)     |
| Oceania                      | Both   | 61 (47 to 77)             | 0.9 (0.7 to 1.1) | -2.8 (-14.7 to 11)   | 54 (41 to 68)             | 0.9 (0.7 to 1)   | -3.8 (-15.6 to 9.6)   | 1490 (1140 to 1910)            | 19.7 (15.1 to 24.9)    | -4.8 (-17.8 to 9.8)   |
|                              | Male   | 48 (36 to 62)             | 1.5 (1.1 to 1.8) | -3 (-16.1 to 12.4)   | 42 (32 to 54)             | 1.4 (1.1 to 1.8) | -4.2 (-16.6 to 11.4)  | 1150 (844 to 1510)             | 30.5 (23.1 to 39)      | -4.6 (-18.7 to 11.9)  |
|                              | Female | 13 (10 to 17)             | 0.4 (0.3 to 0.5) | -4.1 (-20.9 to 16.9) | 11 (8 to 15)              | 0.3 (0.2 to 0.4) | -5.5 (-21.9 to 14.6)  | 342 (248 to 456)               | 8.6 (6.4 to 11.5)      | -6 (-23.7 to 16.2)    |
| Southeast Asia               | Both   | 10300<br>(8890 to 12100)  | 1.7 (1.4 to 1.9) | 6.9 (-6.1 to 21.1)   | 7130<br>(6180 to 8260)    | 1.2 (1 to 1.4)   | -3 (-13.6 to 7.9)     | 190000<br>(163000 to 221000)   | 29.1 (25.2 to 33.8)    | -3.7 (-14.8 to 8)     |
|                              | Male   | 9070<br>(7710 to 10700)   | 3.2 (2.7 to 3.7) | 9.3 (-4.8 to 25.2)   | 6100<br>(5200 to 7190)    | 2.3 (1.9 to 2.7) | -0.7 (-12.4 to 11.7)  | 164000<br>(139000 to 194000)   | 53.8 (45.8 to 63.5)    | -1.8 (-13.9 to 11.1)  |
|                              | Female | 1280<br>(1110 to 1470)    | 0.4 (0.3 to 0.4) | -6.7 (-17.8 to 6.6)  | 1030 (895 to 1170)        | 0.3 (0.3 to 0.4) | -12.3 (-23.3 to -1.5) | 26200<br>(22300 to 30200)      | 7.7 (6.6 to 8.8)       | -13.7 (-25.5 to -1.9) |

|                             |        |                     |                  |                        |                     |                  |                        |                        |                       |                        |
|-----------------------------|--------|---------------------|------------------|------------------------|---------------------|------------------|------------------------|------------------------|-----------------------|------------------------|
| Central Sub-Saharan Africa  | Both   | 751 (585 to 955)    | 1.4 (1.1 to 1.7) | -2 (-17.7 to 17)       | 703 (550 to 888)    | 1.3 (1.1 to 1.7) | -3.9 (-18.3 to 14)     | 20700 (16000 to 26500) | 34 (26.6 to 42.9)     | -4.6 (-20.7 to 15.1)   |
|                             | Male   | 629 (486 to 796)    | 2.6 (2 to 3.2)   | -2.3 (-18.4 to 16.7)   | 590 (457 to 746)    | 2.6 (2 to 3.2)   | -4 (-19.3 to 14.4)     | 17300 (13300 to 22400) | 62.7 (48.8 to 79.3)   | -4.9 (-21.7 to 14.9)   |
|                             | Female | 122 (93 to 158)     | 0.4 (0.3 to 0.5) | -7.8 (-24.7 to 14.2)   | 113 (87 to 146)     | 0.4 (0.3 to 0.5) | -9.2 (-25.6 to 11.6)   | 3360 (2520 to 4390)    | 10.1 (7.7 to 13.1)    | -10.7 (-27.9 to 11.2)  |
| Eastern sub-Saharan Africa  | Both   | 2210 (1890 to 2730) | 1.3 (1.1 to 1.6) | -6.2 (-15.1 to 4)      | 2050 (1750 to 2570) | 1.2 (1.1 to 1.5) | -8 (-16.6 to 1.3)      | 61500 (52100 to 77000) | 32.6 (27.8 to 40.8)   | -9 (-18.3 to 1.1)      |
|                             | Male   | 1780 (1490 to 2300) | 2.2 (1.8 to 2.8) | -6.3 (-16 to 5)        | 1650 (1400 to 2130) | 2.1 (1.8 to 2.7) | -8 (-17.3 to 2.5)      | 49400 (41500 to 63900) | 54.6 (46.2 to 70.6)   | -9.1 (-18.8 to 2.3)    |
|                             | Female | 428 (363 to 500)    | 0.5 (0.4 to 0.5) | -3.6 (-13.5 to 7.3)    | 393 (336 to 457)    | 0.4 (0.4 to 0.5) | -5.7 (-15.5 to 4.4)    | 12100 (10100 to 14300) | 12 (10.2 to 14)       | -6.9 (-17.2 to 4.3)    |
| Southern sub-Saharan Africa | Both   | 1060 (968 to 1180)  | 1.8 (1.6 to 2)   | -18.4 (-25.1 to -10.2) | 900 (827 to 995)    | 1.6 (1.5 to 1.7) | -21.7 (-27.4 to -13.7) | 25700 (23400 to 28600) | 41.8 (38.2 to 46.3)   | -23.3 (-29.6 to -14.8) |
|                             | Male   | 889 (805 to 995)    | 3.6 (3.3 to 4)   | -18.6 (-25.7 to -9.6)  | 756 (690 to 841)    | 3.2 (2.9 to 3.5) | -22 (-27.8 to -13.3)   | 21700 (19700 to 24300) | 81.8 (74.5 to 91.2)   | -23.8 (-30.2 to -14.6) |
|                             | Female | 169 (150 to 191)    | 0.5 (0.5 to 0.6) | -18.5 (-27.4 to -7)    | 144 (127 to 163)    | 0.4 (0.4 to 0.5) | -20.6 (-29.3 to -9.9)  | 4010 (3490 to 4600)    | 11.6 (10.1 to 13.2)   | -22.6 (-32.1 to -11)   |
| Western sub-Saharan Africa  | Both   | 2480 (2010 to 2970) | 1.3 (1.1 to 1.6) | -7.6 (-23.3 to 11.6)   | 2310 (1870 to 2800) | 1.3 (1.1 to 1.5) | -8.6 (-23.6 to 10.9)   | 63700 (50700 to 78600) | 30.9 (25 to 37.7)     | -10.1 (-26.2 to 10.4)  |
|                             | Male   | 2290 (1840 to 2770) | 2.5 (2.1 to 3)   | -3.2 (-20.4 to 17.8)   | 2130 (1710 to 2610) | 2.5 (2 to 3)     | -4.6 (-21 to 17.4)     | 58700 (46000 to 73000) | 59.9 (47.9 to 73.5)   | -5.3 (-22.9 to 18.1)   |
|                             | Female | 195 (163 to 228)    | 0.2 (0.2 to 0.2) | -4.8 (-16.9 to 8.5)    | 180 (152 to 212)    | 0.2 (0.2 to 0.2) | -6 (-17.6 to 7.8)      | 5020 (4150 to 6010)    | 4.6 (3.8 to 5.4)      | -7.4 (-20.3 to 7.9)    |
| Afghanistan                 | Both   | 459 (316 to 616)    | 3.3 (2.3 to 4.3) | -5.9 (-22.6 to 15)     | 423 (293 to 562)    | 3.3 (2.3 to 4.2) | -7.5 (-23.9 to 12.7)   | 13600 (8930 to 18800)  | 85.4 (59.2 to 113.6)  | -8.1 (-25.7 to 13.5)   |
|                             | Male   | 323 (204 to 461)    | 5.1 (3.4 to 7)   | -6.7 (-25.3 to 16.7)   | 302 (195 to 425)    | 5.1 (3.4 to 6.9) | -8 (-25.9 to 14.1)     | 9370 (5620 to 13700)   | 127.7 (82.9 to 178.7) | -9.4 (-28.1 to 14.6)   |
|                             | Female | 136 (89 to 190)     | 1.7 (1.2 to 2.3) | -3.2 (-25 to 25.9)     | 121 (81 to 169)     | 1.6 (1.1 to 2.2) | -4.6 (-26.3 to 23.9)   | 4240 (2700 to 6020)    | 47.3 (31.8 to 65.1)   | -6.9 (-28.5 to 23.1)   |
| Albania                     | Both   | 133 (96 to 181)     | 3.1 (2.3 to 4.3) | 11.5 (-17.7 to 47.9)   | 88 (63 to 119)      | 2.1 (1.5 to 2.8) | 3.5 (-23.2 to 34.9)    | 2100 (1500 to 2890)    | 50.8 (36.2 to 70)     | 1.6 (-25.1 to 34.6)    |

|                     |        |                     |                  |                       |                    |                  |                       |                        |                      |                       |
|---------------------|--------|---------------------|------------------|-----------------------|--------------------|------------------|-----------------------|------------------------|----------------------|-----------------------|
|                     | Male   | 117 (83 to 160)     | 5.7 (4.1 to 7.9) | 12.3 (-18.1 to 49.2)  | 77 (55 to 105)     | 3.8 (2.8 to 5.2) | 4 (-23.7 to 36.3)     | 1870 (1320 to 2570)    | 93.2 (66.1 to 128.2) | 2.7 (-25 to 36.8)     |
|                     | Female | 16 (12 to 21)       | 0.8 (0.6 to 1)   | 14.6 (-14.4 to 49.9)  | 11 (8 to 14)       | 0.5 (0.4 to 0.6) | 4.3 (-19.9 to 33.8)   | 236 (176 to 309)       | 11.4 (8.5 to 15.1)   | 4.6 (-21.5 to 36.3)   |
| Algeria             | Both   | 646 (499 to 830)    | 1.9 (1.5 to 2.4) | 1.9 (-20.9 to 29.5)   | 439 (342 to 563)   | 1.4 (1.1 to 1.8) | -8.2 (-27.5 to 15.5)  | 11700 (8960 to 15000)  | 32.6 (25.3 to 41.8)  | -9.6 (-30.7 to 15.9)  |
|                     | Male   | 573 (439 to 741)    | 3.3 (2.6 to 4.3) | 1 (-22.9 to 30.3)     | 393 (303 to 508)   | 2.4 (1.9 to 3.1) | -9.4 (-29.1 to 15.4)  | 10400 (7860 to 13400)  | 56.9 (43.8 to 73.1)  | -10 (-31.4 to 17.4)   |
|                     | Female | 73 (56 to 93)       | 0.4 (0.3 to 0.5) | 0.7 (-23.5 to 28)     | 46 (36 to 59)      | 0.3 (0.2 to 0.4) | -10.5 (-30.4 to 12.7) | 1350 (1030 to 1740)    | 7.3 (5.6 to 9.3)     | -11.4 (-33.3 to 13.3) |
| American Samoa      | Both   | 0 (0 to 0)          | 0.7 (0.6 to 0.8) | -24.4 (-36.5 to -7.4) | 0 (0 to 0)         | 0.6 (0.5 to 0.7) | -24.8 (-36 to -8)     | 6 (5 to 7)             | 12.4 (10.4 to 14.9)  | -25.3 (-37.5 to -8.2) |
|                     | Male   | 0 (0 to 0)          | 1.3 (1.1 to 1.6) | -26.7 (-38.7 to -8.2) | 0 (0 to 0)         | 1.1 (0.9 to 1.3) | -27.5 (-39.8 to -9.1) | 5 (4 to 6)             | 22.8 (19.1 to 27.7)  | -27.5 (-39.4 to -8.8) |
|                     | Female | 0 (0 to 0)          | 0.1 (0.1 to 0.2) | -0.7 (-22 to 26.4)    | 0 (0 to 0)         | 0.1 (0.1 to 0.1) | -1.5 (-22.2 to 25.4)  | 1 (1 to 1)             | 2.9 (2.3 to 3.7)     | -2 (-23 to 25.5)      |
| Andorra             | Both   | 4 (3 to 6)          | 3.1 (2.3 to 4.1) | -11.6 (-31.9 to 16.2) | 1 (1 to 2)         | 1 (0.8 to 1.3)   | -13.5 (-32.6 to 13)   | 38 (28 to 50)          | 26.9 (20 to 35.6)    | -14.1 (-33.9 to 13.7) |
|                     | Male   | 4 (3 to 6)          | 5.8 (4.3 to 7.7) | -10.7 (-31.2 to 17.3) | 1 (1 to 2)         | 1.9 (1.4 to 2.5) | -13 (-32 to 13)       | 36 (27 to 47)          | 49.8 (36.9 to 65.9)  | -13.2 (-33.1 to 15.2) |
|                     | Female | 0 (0 to 0)          | 0.2 (0.2 to 0.3) | 6.6 (-23 to 47.9)     | 0 (0 to 0)         | 0.1 (0.1 to 0.1) | 5 (-23.2 to 44.6)     | 2 (1 to 2)             | 2.5 (1.7 to 3.4)     | 3.6 (-24.9 to 41.5)   |
| Angola              | Both   | 192 (147 to 251)    | 1.7 (1.3 to 2.1) | -1.2 (-19.7 to 23.8)  | 178 (138 to 230)   | 1.6 (1.3 to 2.1) | -3.7 (-21.4 to 20.8)  | 5240 (3960 to 6830)    | 40.7 (31.7 to 52.5)  | -4.6 (-23.5 to 21.2)  |
|                     | Male   | 167 (127 to 220)    | 3.2 (2.5 to 4.2) | 2.6 (-17 to 28.4)     | 155 (119 to 202)   | 3.2 (2.5 to 4.1) | 0 (-19.1 to 26.9)     | 4540 (3420 to 5960)    | 78.5 (60.8 to 103)   | -0.9 (-21.7 to 27.8)  |
|                     | Female | 25 (19 to 35)       | 0.4 (0.3 to 0.5) | -7.8 (-29.4 to 21.5)  | 23 (17 to 32)      | 0.4 (0.3 to 0.5) | -9.7 (-29.9 to 17.6)  | 701 (502 to 970)       | 9.7 (7.1 to 13.3)    | -12.1 (-33.2 to 17)   |
| Antigua and Barbuda | Both   | 2 (2 to 3)          | 2.2 (1.8 to 2.6) | -3 (-21.6 to 18.8)    | 2 (1 to 2)         | 1.6 (1.3 to 1.9) | -6 (-23.1 to 14.4)    | 39 (32 to 48)          | 37.1 (30.4 to 45)    | -7.1 (-24.8 to 14.6)  |
|                     | Male   | 2 (2 to 3)          | 4.5 (3.8 to 5.5) | -5.8 (-23.9 to 15.4)  | 2 (1 to 2)         | 3.4 (2.8 to 4)   | -8.5 (-25.5 to 11.6)  | 38 (31 to 47)          | 76.3 (62.5 to 92.5)  | -9.8 (-27.1 to 11.1)  |
|                     | Female | 0 (0 to 0)          | 0.1 (0.1 to 0.1) | 3.8 (-16 to 27.7)     | 0 (0 to 0)         | 0.1 (0.1 to 0.1) | 0.1 (-17.7 to 21.9)   | 1 (1 to 1)             | 1.9 (1.6 to 2.4)     | -0.5 (-19.1 to 22.8)  |
| Argentina           | Both   | 1620 (1260 to 2060) | 3.1 (2.4 to 3.9) | -5.4 (-27 to 21.9)    | 1050 (965 to 1150) | 2 (1.8 to 2.1)   | -12 (-19.6 to -2.5)   | 25700 (23500 to 28300) | 49.3 (44.9 to 54.3)  | -13.6 (-22.1 to -4.3) |
|                     | Male   | 1400 (1080 to 1790) | 5.9 (4.5 to 7.5) | -6.8 (-28.4 to 20.7)  | 913 (827 to 1010)  | 3.9 (3.5 to 4.3) | -13.1 (-21.8 to -3.2) | 22500 (20400 to 25100) | 94.1 (85.4 to 104.8) | -14.9 (-24 to -4.5)   |
|                     | Female | 211 (164 to 273)    | 0.7 (0.6 to 0.9) | 1.5 (-22 to 31.4)     | 140 (121 to 159)   | 0.5 (0.4 to 0.5) | -5.8 (-17.7 to 7.3)   | 3220 (2770 to 3660)    | 11.4 (9.7 to 12.9)   | -7.1 (-19.7 to 6.3)   |



|            |        |                     |                  |                       |                     |                  |                       |                         |                        |                        |
|------------|--------|---------------------|------------------|-----------------------|---------------------|------------------|-----------------------|-------------------------|------------------------|------------------------|
| Armenia    | Both   | 150 (122 to 182)    | 3.5 (2.9 to 4.2) | -10.5 (-26.8 to 8.5)  | 107 (88 to 129)     | 2.5 (2.1 to 3)   | -16.3 (-31.1 to 0.8)  | 2780 (2260 to 3370)     | 65.6 (53.9 to 79.1)    | -17.4 (-32.8 to 0.1)   |
|            | Male   | 135 (109 to 164)    | 7.3 (5.9 to 8.8) | -10.8 (-27.7 to 9.2)  | 96 (78 to 117)      | 5.3 (4.3 to 6.4) | -16.4 (-31.5 to 1.4)  | 2520 (2040 to 3060)     | 135.4 (110.2 to 163.6) | -17.5 (-33.1 to 0.4)   |
|            | Female | 15 (12 to 18)       | 0.6 (0.5 to 0.8) | -9.9 (-27.7 to 10.4)  | 11 (9 to 13)        | 0.5 (0.4 to 0.5) | -16.3 (-31.5 to 1.1)  | 252 (201 to 306)        | 10.9 (8.7 to 13.4)     | -16.8 (-32.8 to 0.9)   |
| Australia  | Both   | 788 (602 to 1030)   | 2 (1.5 to 2.6)   | -9.2 (-30.4 to 19.1)  | 257 (231 to 284)    | 0.6 (0.6 to 0.7) | -13.4 (-21.9 to -4.6) | 5710 (5110 to 6320)     | 14.7 (13.2 to 16.2)    | -13.6 (-22.4 to -4.3)  |
|            | Male   | 675 (514 to 881)    | 3.6 (2.7 to 4.7) | -9.8 (-31.8 to 19.2)  | 225 (200 to 250)    | 1.1 (1 to 1.3)   | -14.6 (-23.4 to -4.9) | 4980 (4410 to 5550)     | 26.7 (23.7 to 29.6)    | -14 (-23.7 to -3.3)    |
|            | Female | 113 (83 to 151)     | 0.5 (0.4 to 0.7) | -6.2 (-29.7 to 23)    | 32 (26 to 38)       | 0.1 (0.1 to 0.2) | -11.7 (-24.3 to 1.8)  | 725 (604 to 864)        | 3.6 (3.1 to 4.3)       | -10.8 (-23.5 to 3.5)   |
| Austria    | Both   | 318 (252 to 399)    | 2 (1.6 to 2.6)   | -13.4 (-33.6 to 10)   | 144 (131 to 158)    | 0.9 (0.8 to 1)   | -16.1 (-24.3 to -6.6) | 3500 (3160 to 3880)     | 22.8 (20.5 to 25.3)    | -19.3 (-27.6 to -9.4)  |
|            | Male   | 280 (219 to 352)    | 3.8 (2.9 to 4.8) | -15 (-35.2 to 8.8)    | 126 (113 to 139)    | 1.6 (1.5 to 1.8) | -17.9 (-26.6 to -7.8) | 3070 (2760 to 3430)     | 41.9 (37.6 to 47)      | -20.7 (-29.7 to -10.5) |
|            | Female | 37 (28 to 49)       | 0.5 (0.3 to 0.6) | -7.5 (-29 to 21.9)    | 18 (15 to 21)       | 0.2 (0.2 to 0.2) | -12.4 (-24.4 to 1.8)  | 426 (361 to 504)        | 5.4 (4.5 to 6.4)       | -12.8 (-25 to 2.3)     |
| Azerbaijan | Both   | 312 (242 to 418)    | 3 (2.4 to 4)     | -1.7 (-20.4 to 23.3)  | 238 (185 to 320)    | 2.4 (1.9 to 3.2) | -6.5 (-24.1 to 16.3)  | 7160 (5510 to 9480)     | 64.7 (50.7 to 85.9)    | -8.6 (-27.1 to 15)     |
|            | Male   | 259 (192 to 358)    | 5.4 (4.1 to 7.4) | -0.2 (-21.6 to 30)    | 198 (149 to 270)    | 4.4 (3.4 to 6)   | -4.9 (-24.9 to 22.6)  | 5980 (4450 to 8220)     | 116.8 (88 to 160.1)    | -7 (-27.5 to 21.8)     |
|            | Female | 54 (41 to 71)       | 1 (0.8 to 1.3)   | -6.1 (-28.3 to 20.9)  | 40 (30 to 53)       | 0.8 (0.6 to 1.1) | -10.4 (-30.1 to 15.5) | 1180 (890 to 1570)      | 21 (16 to 27.8)        | -14.3 (-35.2 to 12.4)  |
| Bahamas    | Both   | 13 (10 to 17)       | 3.2 (2.6 to 4)   | 0.9 (-19.5 to 26.5)   | 10 (8 to 12)        | 2.5 (2 to 3.1)   | 0.3 (-19.1 to 24.5)   | 266 (211 to 336)        | 62.9 (50.1 to 78.7)    | -0.1 (-21 to 26.3)     |
|            | Male   | 12 (10 to 15)       | 6.6 (5.2 to 8.2) | 0.5 (-19.7 to 26.7)   | 9 (7 to 11)         | 5.1 (4.1 to 6.3) | -0.3 (-19.5 to 24.4)  | 247 (195 to 313)        | 126.8 (100.4 to 159)   | -0.3 (-21.3 to 26.2)   |
|            | Female | 1 (1 to 1)          | 0.5 (0.4 to 0.6) | 0 (-20.3 to 24.6)     | 1 (1 to 1)          | 0.4 (0.3 to 0.4) | -1.2 (-20.6 to 21.1)  | 19 (15 to 24)           | 8.6 (6.8 to 10.8)      | -1 (-21.7 to 23.3)     |
| Bahrain    | Both   | 13 (9 to 16)        | 1.6 (1.2 to 2.1) | -14.4 (-33.9 to 9.3)  | 7 (6 to 10)         | 1.2 (0.8 to 1.5) | -22.5 (-39.8 to -1.5) | 187 (141 to 243)        | 21.5 (16 to 27.6)      | -23 (-40.3 to -1.7)    |
|            | Male   | 12 (9 to 15)        | 2.9 (2 to 3.7)   | -19.3 (-38.3 to 4.1)  | 7 (5 to 9)          | 2.1 (1.5 to 2.8) | -25.9 (-42.9 to -5.3) | 173 (130 to 226)        | 36.6 (26.8 to 47.3)    | -27.5 (-44.9 to -6.6)  |
|            | Female | 1 (1 to 1)          | 0.2 (0.2 to 0.3) | -13.2 (-32.9 to 8.9)  | 0 (0 to 1)          | 0.1 (0.1 to 0.2) | -23.9 (-40.5 to -5)   | 14 (11 to 18)           | 3.2 (2.5 to 4)         | -21.9 (-38.9 to -1.2)  |
| Bangladesh | Both   | 3410 (2510 to 4910) | 2.6 (1.9 to 3.7) | -13.4 (-33.1 to 11.9) | 2930 (2170 to 4220) | 2.2 (1.7 to 3.2) | -18.9 (-37.2 to 4.6)  | 79200 (57800 to 115000) | 57.7 (42.2 to 83.4)    | -18.8 (-37.4 to 5.1)   |
|            | Male   | 2970 (2140 to 4410) | 4.3 (3.1 to 6.4) | -11.5 (-32.3 to 15.6) | 2560 (1840 to 3790) | 3.8 (2.8 to 5.6) | -17.3 (-36.5 to 7.3)  | 68600 (48700 to 102000) | 97.9 (69.8 to 146.2)   | -16.5 (-36.8 to 9.4)   |

|          |        |                  |                  |                       |                  |                  |                        |                       |                      |                        |
|----------|--------|------------------|------------------|-----------------------|------------------|------------------|------------------------|-----------------------|----------------------|------------------------|
|          | Female | 442 (332 to 575) | 0.7 (0.5 to 0.9) | -5.6 (-27.4 to 21.7)  | 368 (279 to 481) | 0.6 (0.4 to 0.8) | -11.7 (-32 to 13.8)    | 10600 (7860 to 13800) | 15.4 (11.5 to 20.1)  | -12.2 (-34.1 to 13.6)  |
| Barbados | Both   | 10 (8 to 12)     | 2 (1.6 to 2.4)   | 10 (-11 to 33.5)      | 7 (6 to 8)       | 1.4 (1.2 to 1.7) | 9 (-10.5 to 30.6)      | 162 (132 to 196)      | 33.4 (27.1 to 40.5)  | 5 (-15.2 to 27.5)      |
|          | Male   | 9 (7 to 11)      | 3.9 (3.2 to 4.7) | 8.9 (-12.8 to 32.9)   | 6 (5 to 7)       | 2.8 (2.3 to 3.4) | 7.3 (-12.6 to 29.6)    | 144 (116 to 175)      | 64.7 (52.2 to 78.4)  | 4.3 (-16.2 to 27.5)    |
|          | Female | 1 (1 to 1)       | 0.4 (0.4 to 0.5) | 2 (-17.2 to 24.4)     | 1 (1 to 1)       | 0.3 (0.2 to 0.4) | -0.8 (-18.4 to 19.8)   | 18 (15 to 22)         | 6.9 (5.6 to 8.3)     | -1 (-19.8 to 21.1)     |
| Belarus  | Both   | 603 (460 to 803) | 3.9 (2.9 to 5.1) | -6.8 (-29.9 to 24.5)  | 344 (262 to 454) | 2.2 (1.7 to 2.9) | -20.1 (-39.4 to 5.6)   | 9870 (7490 to 13100)  | 64.5 (48.9 to 85.2)  | -21 (-40.5 to 6.6)     |
|          | Male   | 585 (446 to 782) | 9 (6.9 to 11.9)  | -7.9 (-30.4 to 22.3)  | 334 (254 to 441) | 5.3 (4 to 6.9)   | -20.8 (-39.5 to 3.7)   | 9610 (7290 to 12800)  | 147.5 (112.2 to 196) | -21.6 (-40.7 to 4.5)   |
|          | Female | 18 (13 to 30)    | 0.2 (0.1 to 0.3) | -3.7 (-31.1 to 30.9)  | 10 (8 to 17)     | 0.1 (0.1 to 0.2) | -18.7 (-40.3 to 8.3)   | 252 (179 to 424)      | 3 (2.1 to 4.9)       | -20.1 (-42.3 to 8.4)   |
| Belgium  | Both   | 628 (475 to 802) | 3.1 (2.4 to 4)   | -12.9 (-34.3 to 14.3) | 241 (218 to 264) | 1.1 (1 to 1.2)   | -19.6 (-27.1 to -11.4) | 5760 (5190 to 6410)   | 29.8 (26.8 to 33.2)  | -20.9 (-29.2 to -11.5) |
|          | Male   | 553 (418 to 717) | 5.8 (4.4 to 7.5) | -14.2 (-35.6 to 13)   | 204 (183 to 226) | 2.1 (1.9 to 2.3) | -21.5 (-29.9 to -12.7) | 4900 (4360 to 5500)   | 52.5 (46.8 to 58.8)  | -22.2 (-31.4 to -12.1) |
|          | Female | 75 (56 to 98)    | 0.7 (0.5 to 1)   | -11.7 (-34.3 to 16.7) | 37 (32 to 43)    | 0.3 (0.3 to 0.4) | -17.2 (-28.1 to -3.5)  | 852 (732 to 999)      | 8.7 (7.5 to 10.2)    | -17.8 (-29.5 to -3)    |
| Belize   | Both   | 6 (5 to 7)       | 2.1 (1.8 to 2.4) | 3.7 (-11.5 to 21.2)   | 5 (4 to 5)       | 1.7 (1.5 to 2)   | 1.8 (-12.3 to 17.6)    | 129 (110 to 150)      | 42.9 (36.8 to 50)    | 1.3 (-13.3 to 18.6)    |
|          | Male   | 5 (5 to 6)       | 3.7 (3.2 to 4.4) | 5.9 (-10.2 to 24.8)   | 4 (4 to 5)       | 3.1 (2.6 to 3.6) | 3.7 (-11.4 to 20.4)    | 117 (100 to 138)      | 77.1 (65.8 to 90.6)  | 3.8 (-11.9 to 22)      |
|          | Female | 1 (0 to 1)       | 0.4 (0.3 to 0.5) | -3.5 (-18.2 to 13.6)  | 0 (0 to 1)       | 0.3 (0.3 to 0.4) | -5.7 (-20 to 10.3)     | 11 (10 to 14)         | 7.7 (6.6 to 9.2)     | -5.1 (-19.8 to 11.8)   |
| Benin    | Both   | 60 (45 to 78)    | 1.3 (1 to 1.6)   | -3.6 (-21.7 to 17.2)  | 57 (43 to 74)    | 1.2 (1 to 1.6)   | -4.6 (-22.4 to 15.1)   | 1520 (1110 to 2020)   | 29.6 (22 to 38.8)    | -5.3 (-23.6 to 16.6)   |
|          | Male   | 54 (39 to 71)    | 2.4 (1.8 to 3.2) | -4 (-22.3 to 17.9)    | 51 (37 to 67)    | 2.5 (1.9 to 3.2) | -4.8 (-22.6 to 15.7)   | 1360 (981 to 1810)    | 56.4 (41.1 to 74.1)  | -5.9 (-24.5 to 16.6)   |
|          | Female | 6 (5 to 8)       | 0.2 (0.2 to 0.3) | -5.9 (-26.2 to 18.5)  | 6 (5 to 8)       | 0.2 (0.2 to 0.3) | -6.5 (-26 to 17)       | 162 (118 to 218)      | 5.8 (4.3 to 7.7)     | -7.8 (-28.4 to 16.9)   |
| Bermuda  | Both   | 4 (3 to 5)       | 3.3 (2.7 to 4)   | -1.6 (-18.9 to 20.2)  | 2 (2 to 2)       | 1.6 (1.3 to 1.9) | -8.9 (-23.9 to 9.2)    | 47 (38 to 57)         | 37.8 (30.9 to 46.3)  | -9.3 (-26.2 to 11)     |
|          | Male   | 4 (3 to 5)       | 6.7 (5.5 to 8.2) | -3.5 (-20.7 to 18)    | 2 (2 to 2)       | 3.4 (2.8 to 4)   | -10.7 (-25.7 to 6.9)   | 44 (36 to 53)         | 77.1 (63.1 to 94)    | -11.1 (-27.5 to 9.2)   |
|          | Female | 0 (0 to 0)       | 0.4 (0.3 to 0.5) | 0.7 (-19.1 to 26)     | 0 (0 to 0)       | 0.2 (0.1 to 0.2) | -7.4 (-24.4 to 16.3)   | 3 (2 to 4)            | 4.1 (3.2 to 5.2)     | -6.8 (-24.1 to 18.8)   |
| Bhutan   | Both   | 14 (10 to 20)    | 2.5 (1.7 to 3.6) | 0.6 (-18.5 to 23.6)   | 12 (8 to 17)     | 2.1 (1.5 to 3.1) | -4.7 (-21.9 to 15.4)   | 310 (212 to 463)      | 52.5 (35.9 to 77.7)  | -6.5 (-24.7 to 16.5)   |
|          | Male   | 11 (7 to 17)     | 3.9 (2.6 to 5.9) | 1.1 (-20.1 to 26.3)   | 10 (6 to 14)     | 3.5 (2.3 to 5.1) | -4.3 (-22.9 to 17.5)   | 252 (165 to 393)      | 83.3 (54.6 to 128.3) | -5.7 (-26.3 to 19.2)   |

|                        |        |                     |                    |                      |                     |                  |                       |                           |                        |                       |
|------------------------|--------|---------------------|--------------------|----------------------|---------------------|------------------|-----------------------|---------------------------|------------------------|-----------------------|
|                        | Female | 3 (2 to 4)          | 0.9 (0.7 to 1.3)   | 2.5 (-20 to 33.2)    | 2 (2 to 3)          | 0.8 (0.6 to 1)   | -3.5 (-23.8 to 24.7)  | 58 (41 to 82)             | 19.9 (14.3 to 27.4)    | -5.5 (-27.2 to 23.6)  |
| Bolivia                | Both   | 120 (92 to 155)     | 1.4 (1.1 to 1.8)   | 5.7 (-15.3 to 31.2)  | 110 (84 to 140)     | 1.3 (1 to 1.7)   | 1.8 (-18.2 to 24.8)   | 2560 (1950 to 3370)       | 28.3 (21.6 to 36.9)    | -0.9 (-21.6 to 23.9)  |
|                        | Male   | 95 (70 to 123)      | 2.3 (1.7 to 3)     | 7.1 (-16.1 to 34.8)  | 88 (65 to 113)      | 2.2 (1.7 to 2.9) | 3 (-18.9 to 28.7)     | 2000 (1460 to 2650)       | 46.9 (34.5 to 61.5)    | 1 (-21.7 to 28.2)     |
|                        | Female | 25 (19 to 33)       | 0.6 (0.4 to 0.7)   | -0.5 (-20.4 to 24.4) | 23 (17 to 29)       | 0.5 (0.4 to 0.6) | -4.3 (-23.1 to 18.9)  | 558 (421 to 739)          | 11.6 (8.8 to 15.3)     | -7.5 (-26.3 to 17.8)  |
| Bosnia and Herzegovina | Both   | 222 (171 to 287)    | 3.7 (2.8 to 4.8)   | 4.2 (-19.4 to 34.7)  | 155 (120 to 196)    | 2.6 (2 to 3.3)   | 0.1 (-22.3 to 27.8)   | 3720 (2850 to 4820)       | 62.7 (47.8 to 81.3)    | -1.4 (-24.1 to 27.3)  |
|                        | Male   | 198 (151 to 258)    | 7.3 (5.5 to 9.4)   | 3.4 (-19.9 to 34)    | 139 (107 to 177)    | 5.2 (4 to 6.6)   | -0.6 (-22.9 to 27.6)  | 3350 (2550 to 4330)       | 122.8 (93.8 to 159.6)  | -2 (-25 to 27.4)      |
|                        | Female | 24 (18 to 30)       | 0.7 (0.6 to 1)     | 3.2 (-21.3 to 33.2)  | 17 (13 to 21)       | 0.5 (0.4 to 0.6) | -1.8 (-23 to 24.7)    | 365 (284 to 466)          | 11.7 (9.1 to 15.1)     | -2.4 (-25.7 to 26.3)  |
| Botswana               | Both   | 38 (27 to 53)       | 2.6 (1.9 to 3.5)   | -8.8 (-28.1 to 13.9) | 30 (22 to 41)       | 2.1 (1.6 to 2.8) | -13.9 (-31.5 to 6.2)  | 909 (630 to 1270)         | 57.1 (40.5 to 78.4)    | -15.9 (-35 to 6.4)    |
|                        | Male   | 32 (23 to 44)       | 5 (3.7 to 6.9)     | -10.7 (-29.9 to 9.8) | 25 (18 to 35)       | 4.2 (3.1 to 5.8) | -15.5 (-32.7 to 3.4)  | 761 (526 to 1070)         | 109.1 (78 to 150.7)    | -17.6 (-36.1 to 3.3)  |
|                        | Female | 6 (4 to 9)          | 0.8 (0.5 to 1.1)   | -2.6 (-30.2 to 39.1) | 5 (3 to 7)          | 0.6 (0.4 to 0.9) | -9 (-34 to 27.4)      | 148 (93 to 222)           | 16.7 (10.7 to 24.6)    | -9.4 (-35.9 to 30.3)  |
| Brazil                 | Both   | 7680 (7250 to 8110) | 3.2 (3 to 3.3)     | -8.7 (-13.7 to -3.8) | 5450 (5140 to 5730) | 2.3 (2.1 to 2.4) | -13.1 (-17.4 to -8.4) | 147000 (139000 to 154000) | 59.6 (56.4 to 62.6)    | -14.5 (-19.1 to -9.7) |
|                        | Male   | 6680 (6250 to 7110) | 6 (5.6 to 6.4)     | -8.7 (-14.3 to -3)   | 4730 (4430 to 4990) | 4.4 (4.1 to 4.6) | -13.1 (-18.1 to -7.9) | 128000 (121000 to 136000) | 113 (106.1 to 119.2)   | -14.5 (-19.6 to -9.2) |
|                        | Female | 1000 (899 to 1110)  | 0.8 (0.7 to 0.8)   | -6.5 (-13.2 to 2.4)  | 726 (641 to 805)    | 0.6 (0.5 to 0.6) | -11 (-17.1 to -3.1)   | 18100 (16400 to 20000)    | 13.8 (12.5 to 15.3)    | -12.7 (-19.1 to -4.4) |
| Brunei                 | Both   | 6 (5 to 7)          | 2.1 (1.7 to 2.6)   | -8.8 (-24.8 to 8.7)  | 3 (2 to 3)          | 1.1 (0.9 to 1.3) | -15.8 (-28.5 to -0.7) | 67 (56 to 82)             | 22.3 (18.8 to 26.8)    | -13.6 (-27.3 to 2.8)  |
|                        | Male   | 5 (4 to 6)          | 3.9 (3.2 to 4.9)   | -3.2 (-22.5 to 17.7) | 2 (2 to 3)          | 2.2 (1.8 to 2.7) | -5.7 (-22.3 to 13.9)  | 53 (43 to 67)             | 40.5 (33.3 to 49.7)    | -9.3 (-25.6 to 9.4)   |
|                        | Female | 1 (1 to 1)          | 0.8 (0.6 to 0.9)   | -11.5 (-29 to 7.7)   | 1 (0 to 1)          | 0.4 (0.3 to 0.5) | -17.9 (-31.9 to -0.7) | 14 (11 to 17)             | 8.7 (7.3 to 10.3)      | -15.2 (-29.7 to 2.4)  |
| Bulgaria               | Both   | 702 (530 to 907)    | 5.6 (4.2 to 7.3)   | 2.9 (-23.7 to 34.5)  | 401 (309 to 509)    | 3.1 (2.3 to 3.9) | -7.1 (-29.8 to 19.7)  | 10900 (8280 to 13900)     | 90 (68.6 to 116)       | -6.5 (-30 to 22.3)    |
|                        | Male   | 666 (500 to 863)    | 11.4 (8.6 to 14.9) | 0.8 (-25.8 to 32.5)  | 377 (289 to 480)    | 6.3 (4.8 to 8.1) | -8.5 (-30.8 to 18.4)  | 10300 (7820 to 13200)     | 180.5 (137.1 to 231.5) | -8.4 (-32.1 to 20.1)  |
|                        | Female | 36 (27 to 47)       | 0.5 (0.4 to 0.7)   | 12 (-16.9 to 48.5)   | 24 (18 to 31)       | 0.3 (0.2 to 0.4) | 0.7 (-23.1 to 30)     | 579 (432 to 756)          | 9.1 (6.7 to 12.1)      | 2.3 (-24.6 to 35.8)   |

|                         |        |                     |                  |                       |                  |                  |                      |                        |                      |                       |
|-------------------------|--------|---------------------|------------------|-----------------------|------------------|------------------|----------------------|------------------------|----------------------|-----------------------|
| Burkina Faso            | Both   | 135 (104 to 170)    | 1.5 (1.2 to 1.9) | 8.7 (-10.8 to 34.2)   | 128 (99 to 161)  | 1.5 (1.2 to 1.9) | 6.8 (-11.8 to 30.6)  | 3470 (2660 to 4460)    | 35.5 (27.3 to 44.9)  | 8.5 (-11.8 to 34.9)   |
|                         | Male   | 121 (92 to 156)     | 3 (2.3 to 3.8)   | 12.1 (-9.1 to 38.8)   | 115 (88 to 147)  | 3 (2.3 to 3.8)   | 10.2 (-9.9 to 35.2)  | 3110 (2330 to 4040)    | 70.4 (53.5 to 90.7)  | 11.5 (-10.5 to 40)    |
|                         | Female | 14 (11 to 18)       | 0.3 (0.2 to 0.3) | 8.1 (-13.5 to 38.3)   | 13 (10 to 16)    | 0.3 (0.2 to 0.3) | 7 (-13.7 to 35)      | 360 (270 to 460)       | 6.6 (5 to 8.4)       | 7.4 (-15.9 to 38.7)   |
| Burundi                 | Both   | 77 (55 to 109)      | 1.6 (1.1 to 2.2) | -6.6 (-24.3 to 17.9)  | 73 (52 to 102)   | 1.5 (1.1 to 2.1) | -6.8 (-24 to 14.8)   | 2230 (1570 to 3160)    | 41.1 (29.4 to 57.5)  | -7.3 (-25.6 to 17.2)  |
|                         | Male   | 62 (43 to 91)       | 2.4 (1.7 to 3.5) | -8.4 (-26.6 to 15.5)  | 59 (41 to 85)    | 2.4 (1.7 to 3.4) | -8.8 (-26.2 to 14.7) | 1790 (1220 to 2640)    | 63.2 (43.9 to 91.8)  | -8.8 (-28.3 to 15.9)  |
|                         | Female | 15 (11 to 21)       | 0.6 (0.4 to 0.8) | -9.3 (-30.8 to 16.9)  | 14 (10 to 19)    | 0.6 (0.4 to 0.8) | -9.5 (-31.1 to 15.8) | 443 (313 to 618)       | 16.4 (11.7 to 22.6)  | -10.3 (-31.5 to 17.9) |
| Cabo Verde              | Both   | 7 (6 to 8)          | 1.6 (1.4 to 1.9) | 53.1 (25.9 to 84.1)   | 6 (5 to 7)       | 1.4 (1.2 to 1.6) | 46.3 (21.8 to 74.2)  | 133 (110 to 163)       | 30.4 (25.4 to 37.1)  | 36.9 (11.1 to 66.5)   |
|                         | Male   | 6 (5 to 8)          | 3.5 (2.9 to 4.2) | 48.2 (20.6 to 80.2)   | 5 (4 to 6)       | 3 (2.6 to 3.6)   | 42.4 (16.9 to 71.5)  | 122 (101 to 151)       | 64.6 (53.7 to 79)    | 32.8 (7.1 to 62.6)    |
|                         | Female | 1 (0 to 1)          | 0.2 (0.2 to 0.3) | 44 (13.6 to 84.3)     | 1 (0 to 1)       | 0.2 (0.2 to 0.3) | 38.3 (9.1 to 77.2)   | 10 (8 to 13)           | 4.3 (3.5 to 5.4)     | 27.1 (0.4 to 62.1)    |
| Cambodia                | Both   | 222 (165 to 292)    | 1.9 (1.4 to 2.4) | 14.2 (-6.4 to 36.1)   | 187 (140 to 242) | 1.6 (1.2 to 2.1) | 6.4 (-12 to 26.7)    | 4860 (3600 to 6370)    | 38.6 (28.9 to 50.5)  | 5.3 (-14.6 to 27.8)   |
|                         | Male   | 183 (133 to 247)    | 3.8 (2.7 to 5.1) | 18.3 (-4 to 44.6)     | 152 (111 to 204) | 3.3 (2.4 to 4.5) | 10.3 (-10 to 34.6)   | 3960 (2860 to 5290)    | 75.8 (55.2 to 102.4) | 8.3 (-12.5 to 33.1)   |
|                         | Female | 39 (30 to 50)       | 0.6 (0.4 to 0.7) | 0.6 (-19 to 26.2)     | 34 (26 to 44)    | 0.5 (0.4 to 0.7) | -4 (-22 to 18.9)     | 892 (665 to 1160)      | 12.3 (9.3 to 15.8)   | -6.6 (-25.8 to 19.6)  |
| Cameroon                | Both   | 200 (145 to 272)    | 1.7 (1.2 to 2.2) | -4.8 (-25 to 19.2)    | 184 (134 to 248) | 1.6 (1.2 to 2.1) | -7.3 (-25.3 to 16.2) | 5070 (3580 to 7000)    | 39.3 (28.5 to 53.6)  | -8.9 (-28.7 to 18.5)  |
|                         | Male   | 183 (129 to 250)    | 3.2 (2.4 to 4.3) | -4 (-24.7 to 20.1)    | 168 (120 to 228) | 3.1 (2.3 to 4.1) | -6.4 (-25.9 to 17.5) | 4630 (3240 to 6410)    | 74.2 (53.2 to 100.9) | -8 (-28.5 to 19.9)    |
|                         | Female | 17 (12 to 24)       | 0.3 (0.2 to 0.4) | -7.5 (-30.9 to 21.4)  | 16 (11 to 22)    | 0.3 (0.2 to 0.4) | -9.9 (-32 to 16.7)   | 431 (298 to 608)       | 6.4 (4.5 to 8.9)     | -12 (-34 to 16.8)     |
| Canada                  | Both   | 1510 (1140 to 1930) | 2.3 (1.7 to 2.9) | -5.9 (-29 to 20.4)    | 508 (459 to 556) | 0.7 (0.7 to 0.8) | -8.8 (-17.2 to -0.3) | 11300 (10100 to 12500) | 17.2 (15.4 to 19)    | -10.2 (-19 to -0.9)   |
|                         | Male   | 1240 (936 to 1610)  | 3.9 (3 to 5)     | -6.4 (-30.1 to 20.4)  | 421 (377 to 466) | 1.3 (1.2 to 1.4) | -9.8 (-19.2 to -1)   | 9360 (8260 to 10400)   | 30 (26.6 to 33.2)    | -10.6 (-20.7 to -0.6) |
|                         | Female | 269 (199 to 357)    | 0.8 (0.6 to 1)   | -8.1 (-31.8 to 21.4)  | 87 (73 to 102)   | 0.2 (0.2 to 0.3) | -12.5 (-23.9 to 1.3) | 1940 (1630 to 2320)    | 5.8 (4.9 to 6.9)     | -12.3 (-24.2 to 2.1)  |
| Central Africa Republic | Both   | 43 (30 to 59)       | 1.8 (1.3 to 2.4) | -9.1 (-26 to 10.1)    | 42 (30 to 57)    | 1.8 (1.3 to 2.4) | -9.2 (-25.9 to 10.2) | 1310 (911 to 1840)     | 49.5 (35.4 to 67.9)  | -9.4 (-27.6 to 11.4)  |
|                         | Male   | 36 (25 to 50)       | 3.4 (2.5 to 4.5) | -8.8 (-26.8 to 10.9)  | 35 (25 to 49)    | 3.5 (2.6 to 4.6) | -8.9 (-26.3 to 11)   | 1120 (758 to 1570)     | 91.9 (65.7 to 125.1) | -9.4 (-28.4 to 11.8)  |
|                         | Female | 6 (4 to 9)          | 0.5 (0.3 to 0.7) | -10.1 (-32.9 to 19.1) | 6 (4 to 9)       | 0.5 (0.3 to 0.7) | -9.8 (-32.1 to 19)   | 195 (128 to 285)       | 13.8 (9.2 to 20)     | -11 (-34.6 to 18.9)   |

|              |        |                        |                  |                      |                        |                  |                       |                           |                     |                       |
|--------------|--------|------------------------|------------------|----------------------|------------------------|------------------|-----------------------|---------------------------|---------------------|-----------------------|
| Chad         | Both   | 75 (57 to 96)          | 1.4 (1.1 to 1.7) | -2.5 (-20.8 to 20.4) | 74 (56 to 93)          | 1.4 (1.1 to 1.7) | -3.4 (-21 to 18.4)    | 1960 (1460 to 2540)       | 33.2 (25 to 42.5)   | -5.2 (-23.4 to 18.4)  |
|              | Male   | 68 (51 to 87)          | 2.3 (1.7 to 2.9) | -4.8 (-23.6 to 19.3) | 66 (50 to 85)          | 2.3 (1.8 to 3)   | -5.9 (-23.6 to 17.1)  | 1760 (1300 to 2300)       | 55.3 (41.2 to 71.6) | -7.1 (-26.1 to 17.9)  |
|              | Female | 7 (5 to 10)            | 0.3 (0.2 to 0.4) | -4.7 (-25.5 to 20)   | 7 (5 to 9)             | 0.3 (0.2 to 0.4) | -5.3 (-25.1 to 19)    | 197 (144 to 264)          | 6.9 (5.2 to 9.2)    | -7.3 (-27.4 to 18.8)  |
| Chile        | Both   | 321 (248 to 408)       | 1.3 (1 to 1.7)   | -5.6 (-26.9 to 19.2) | 179 (162 to 197)       | 0.7 (0.7 to 0.8) | -14.3 (-23.1 to -5.3) | 3920 (3540 to 4330)       | 16.2 (14.6 to 17.9) | -14.6 (-23.5 to -5)   |
|              | Male   | 275 (209 to 352)       | 2.5 (1.9 to 3.2) | -5.9 (-28.1 to 19.3) | 153 (137 to 171)       | 1.4 (1.3 to 1.6) | -14.7 (-24.4 to -4.7) | 3380 (3020 to 3760)       | 30.6 (27.5 to 34.1) | -14.8 (-24.5 to -4.2) |
|              | Female | 46 (34 to 59)          | 0.3 (0.3 to 0.4) | -4.6 (-28 to 25.4)   | 26 (22 to 30)          | 0.2 (0.2 to 0.2) | -13.4 (-24.8 to 0.8)  | 540 (461 to 628)          | 4.2 (3.6 to 4.9)    | -13.3 (-25.1 to 0.7)  |
| China        | Both   | 45400 (36800 to 55400) | 2.2 (1.8 to 2.7) | 12 (-8.8 to 39.5)    | 20300 (16800 to 24200) | 1 (0.8 to 1.2)   | -8.6 (-24.9 to 10.4)  | 498000 (412000 to 600000) | 23.9 (19.8 to 28.6) | -8.7 (-25.4 to 11.5)  |
|              | Male   | 38900 (30400 to 48700) | 3.9 (3.1 to 4.8) | 15.2 (-8.8 to 46.5)  | 16800 (13500 to 20700) | 1.8 (1.5 to 2.2) | -6.4 (-25.6 to 15.1)  | 422000 (338000 to 520000) | 41.5 (33.5 to 51)   | -6 (-26 to 16.3)      |
|              | Female | 6450 (5130 to 7880)    | 0.6 (0.5 to 0.8) | -2.1 (-21.7 to 21.3) | 3420 (2740 to 4130)    | 0.3 (0.3 to 0.4) | -16.8 (-34.1 to 1.8)  | 76400 (61400 to 92800)    | 7.3 (5.9 to 8.9)    | -18.2 (-35.5 to 0.4)  |
| Colombia     | Both   | 773 (583 to 1000)      | 1.5 (1.1 to 1.9) | -8.9 (-32 to 17)     | 550 (422 to 701)       | 1 (0.8 to 1.3)   | -16.6 (-36.7 to 6.7)  | 11800 (8880 to 15500)     | 22.4 (16.9 to 29.4) | -17.3 (-38.8 to 7.2)  |
|              | Male   | 600 (450 to 789)       | 2.5 (1.9 to 3.3) | -9.3 (-33.1 to 20.3) | 428 (322 to 556)       | 1.8 (1.4 to 2.3) | -16.5 (-38 to 8.9)    | 9240 (6860 to 12200)      | 38.5 (28.6 to 50.6) | -17.8 (-39.6 to 9.5)  |
|              | Female | 173 (129 to 238)       | 0.6 (0.4 to 0.8) | -3.4 (-26.1 to 23.2) | 122 (93 to 165)        | 0.4 (0.3 to 0.6) | -12.5 (-32.8 to 9.4)  | 2580 (1930 to 3680)       | 9 (6.7 to 12.9)     | -11.8 (-32.9 to 11.8) |
| Comoros      | Both   | 5 (4 to 7)             | 1.1 (0.8 to 1.4) | 1.5 (-20.9 to 26.6)  | 5 (4 to 7)             | 1 (0.8 to 1.3)   | -0.8 (-21.6 to 22.5)  | 141 (100 to 192)          | 26.8 (19.5 to 36.1) | 1.5 (-22.4 to 29.5)   |
|              | Male   | 4 (3 to 5)             | 1.7 (1.3 to 2.3) | 2.1 (-21.9 to 30)    | 4 (3 to 5)             | 1.6 (1.2 to 2.2) | -0.1 (-23.1 to 25.7)  | 103 (71 to 143)           | 42.1 (30.2 to 57.8) | 1.8 (-23.4 to 31.6)   |
|              | Female | 1 (1 to 2)             | 0.5 (0.4 to 0.7) | -1.4 (-24 to 29.3)   | 1 (1 to 2)             | 0.5 (0.4 to 0.6) | -3.4 (-24.7 to 25.8)  | 38 (27 to 52)             | 13.6 (9.8 to 18.2)  | -1.7 (-26.7 to 31)    |
| Congo        | Both   | 43 (32 to 56)          | 1.6 (1.2 to 2)   | -0.4 (-19 to 22.8)   | 39 (30 to 51)          | 1.5 (1.2 to 2)   | -1.9 (-20 to 20.6)    | 1150 (841 to 1520)        | 38.6 (29.3 to 50.2) | -4.2 (-23.7 to 20.3)  |
|              | Male   | 36 (27 to 48)          | 2.8 (2.2 to 3.7) | -1.7 (-21 to 22.9)   | 33 (25 to 44)          | 2.8 (2.2 to 3.6) | -3.4 (-21.6 to 19.8)  | 952 (700 to 1280)         | 66.7 (50.8 to 87.5) | -5 (-24.8 to 19.8)    |
|              | Female | 7 (5 to 10)            | 0.5 (0.4 to 0.7) | -11 (-32.2 to 17.4)  | 6 (5 to 9)             | 0.5 (0.3 to 0.6) | -12.3 (-33.1 to 14.9) | 194 (131 to 271)          | 12.3 (8.6 to 17.1)  | -14.9 (-37 to 13.4)   |
| Cook Islands | Both   | 0 (0 to 0)             | 0.8 (0.7 to 1)   | -10.7 (-25.8 to 6.3) | 0 (0 to 0)             | 0.5 (0.4 to 0.6) | -17.5 (-30.4 to -2)   | 3 (2 to 3)                | 11.1 (9.1 to 13.9)  | -16.4 (-30.7 to 0.5)  |

|               |        |                     |                     |                       |                   |                   |                       |                        |                       |                       |
|---------------|--------|---------------------|---------------------|-----------------------|-------------------|-------------------|-----------------------|------------------------|-----------------------|-----------------------|
|               | Male   | 0 (0 to 0)          | 1.5 (1.2 to 1.8)    | -9.5 (-25.2 to 9.9)   | 0 (0 to 0)        | 0.9 (0.8 to 1.2)  | -16.4 (-30 to 0.9)    | 2 (2 to 3)             | 19.5 (15.9 to 24.4)   | -15.3 (-30.3 to 3.5)  |
|               | Female | 0 (0 to 0)          | 0.2 (0.2 to 0.3)    | -6.1 (-28.5 to 25.6)  | 0 (0 to 0)        | 0.1 (0.1 to 0.2)  | -12 (-31.8 to 15.3)   | 0 (0 to 1)             | 3.4 (2.5 to 4.5)      | -12.5 (-33.4 to 16.4) |
| Costa Rica    | Both   | 87 (66 to 112)      | 1.7 (1.3 to 2.2)    | -5.9 (-28.4 to 20.9)  | 56 (43 to 71)     | 1.1 (0.8 to 1.4)  | -11.2 (-31.5 to 13.1) | 1240 (937 to 1600)     | 24 (18.2 to 30.9)     | -12.1 (-33.4 to 13)   |
|               | Male   | 77 (58 to 100)      | 3.3 (2.5 to 4.2)    | -3.8 (-27.3 to 24.4)  | 50 (38 to 64)     | 2.2 (1.6 to 2.8)  | -9.3 (-30.3 to 16.8)  | 1110 (831 to 1430)     | 46.3 (35 to 59.5)     | -10.2 (-32.5 to 17)   |
|               | Female | 10 (7 to 12)        | 0.3 (0.3 to 0.4)    | -7.6 (-29 to 21.2)    | 6 (5 to 8)        | 0.2 (0.2 to 0.3)  | -12.2 (-31.8 to 14.2) | 131 (100 to 172)       | 4.7 (3.6 to 6.2)      | -13.9 (-33.9 to 11.4) |
| Croatia       | Both   | 345 (264 to 445)    | 4.3 (3.3 to 5.6)    | -10.6 (-32.7 to 17.6) | 193 (150 to 246)  | 2.3 (1.8 to 3)    | -16.1 (-35.8 to 9.2)  | 4660 (3590 to 6060)    | 59.9 (45.9 to 78.1)   | -17.9 (-37.8 to 7.9)  |
|               | Male   | 321 (245 to 415)    | 8.8 (6.7 to 11.4)   | -12.2 (-34.4 to 14.9) | 180 (139 to 230)  | 4.9 (3.8 to 6.2)  | -17.8 (-36.9 to 6.7)  | 4390 (3350 to 5730)    | 121.7 (93.4 to 158.6) | -19.1 (-38.8 to 6.6)  |
|               | Female | 24 (18 to 32)       | 0.6 (0.4 to 0.7)    | -13.9 (-35.3 to 17.8) | 13 (10 to 17)     | 0.3 (0.2 to 0.3)  | -21.4 (-39.8 to 4.2)  | 276 (205 to 365)       | 6.6 (4.9 to 8.6)      | -21.9 (-41.8 to 5.9)  |
| Cuba          | Both   | 1600 (1290 to 1980) | 8.5 (6.8 to 10.5)   | 7.4 (-14.6 to 33.4)   | 962 (781 to 1180) | 5 (4.1 to 6.2)    | -0.2 (-19.7 to 22.5)  | 23000 (18300 to 28600) | 123.1 (97.9 to 152.8) | -0.8 (-21.6 to 23.3)  |
|               | Male   | 1400 (1120 to 1750) | 15.7 (12.5 to 19.5) | 9.4 (-13.8 to 38)     | 844 (679 to 1040) | 9.4 (7.5 to 11.5) | 1.7 (-18.3 to 25.8)   | 20400 (16200 to 25400) | 228.3 (181 to 284.2)  | 0.9 (-20.5 to 26)     |
|               | Female | 196 (153 to 244)    | 2 (1.5 to 2.5)      | 0.8 (-20.9 to 27)     | 118 (93 to 146)   | 1.2 (0.9 to 1.4)  | -6.2 (-24.5 to 16.2)  | 2620 (2070 to 3290)    | 27 (21.4 to 34)       | -7.1 (-26.8 to 16.9)  |
| Cyprus        | Both   | 40 (32 to 48)       | 2 (1.6 to 2.5)      | -9.8 (-26.8 to 12.3)  | 16 (13 to 19)     | 0.8 (0.7 to 1)    | -17.5 (-30.4 to -1.4) | 358 (303 to 422)       | 18.7 (15.8 to 22)     | -16.4 (-29.2 to -0.1) |
|               | Male   | 37 (29 to 45)       | 4 (3.2 to 4.9)      | -12.3 (-29.7 to 9.9)  | 14 (12 to 17)     | 1.6 (1.3 to 1.9)  | -22.5 (-34.8 to -6.3) | 325 (271 to 386)       | 35.5 (29.8 to 41.9)   | -18.2 (-31.4 to -1.5) |
|               | Female | 3 (2 to 3)          | 0.3 (0.2 to 0.3)    | -15 (-32.4 to 7.4)    | 1 (1 to 2)        | 0.1 (0.1 to 0.2)  | -16 (-29.3 to 1.8)    | 32 (27 to 39)          | 3.4 (2.8 to 4.1)      | -18.3 (-31.9 to -0.9) |
| Czechia       | Both   | 533 (423 to 665)    | 2.8 (2.2 to 3.5)    | -11 (-29.5 to 12.9)   | 267 (215 to 330)  | 1.4 (1.1 to 1.7)  | -16 (-32.5 to 5)      | 6760 (5410 to 8460)    | 36.8 (29.3 to 46.3)   | -18.3 (-35.2 to 3.2)  |
|               | Male   | 470 (374 to 593)    | 5.3 (4.2 to 6.6)    | -14.6 (-33.2 to 8.3)  | 242 (193 to 299)  | 2.7 (2.1 to 3.3)  | -19 (-35.4 to 0.9)    | 6170 (4920 to 7720)    | 70.5 (55.5 to 88.3)   | -21 (-37.5 to -0.1)   |
|               | Female | 63 (46 to 82)       | 0.6 (0.5 to 0.8)    | 4.8 (-20.1 to 37.3)   | 26 (19 to 32)     | 0.2 (0.2 to 0.3)  | -2.6 (-23.9 to 22.9)  | 597 (438 to 767)       | 6.2 (4.5 to 7.9)      | -3.4 (-25 to 24.6)    |
| Côte d'Ivoire | Both   | 166 (122 to 215)    | 1.6 (1.2 to 2)      | -7.6 (-26.6 to 15.9)  | 155 (115 to 199)  | 1.6 (1.2 to 2)    | -8.2 (-26.3 to 13.9)  | 4340 (3150 to 5710)    | 37.3 (27.6 to 48)     | -9.4 (-29.3 to 16.2)  |
|               | Male   | 154 (112 to 200)    | 2.9 (2.1 to 3.6)    | -8.2 (-27.2 to 15.2)  | 144 (105 to 186)  | 2.8 (2.2 to 3.6)  | -8.7 (-26.8 to 13.9)  | 4040 (2900 to 5320)    | 66.2 (48.4 to 85.5)   | -10.1 (-30.2 to 15.8) |
|               | Female | 12 (9 to 16)        | 0.2 (0.2 to 0.3)    | -7.4 (-29.6 to 22.3)  | 11 (8 to 15)      | 0.2 (0.2 to 0.3)  | -8 (-29.1 to 21.6)    | 309 (222 to 413)       | 5.5 (4.1 to 7.3)      | -9.6 (-32.3 to 19.1)  |

|                                  |        |                  |                  |                       |                  |                  |                        |                       |                       |                        |
|----------------------------------|--------|------------------|------------------|-----------------------|------------------|------------------|------------------------|-----------------------|-----------------------|------------------------|
| North Korea                      | Both   | 453 (353 to 577) | 1.4 (1.1 to 1.7) | -3.9 (-20.3 to 14.1)  | 321 (256 to 400) | 1 (0.8 to 1.2)   | -8.5 (-22.8 to 7.8)    | 8860 (6790 to 11400)  | 26.5 (20.5 to 34.1)   | -8.3 (-25.1 to 10)     |
|                                  | Male   | 371 (280 to 482) | 2.6 (2 to 3.4)   | -6.3 (-23 to 13)      | 255 (197 to 328) | 1.9 (1.5 to 2.4) | -10.9 (-25.9 to 6.5)   | 7250 (5400 to 9550)   | 48.7 (37.4 to 62.9)   | -10.4 (-26.9 to 7.9)   |
|                                  | Female | 82 (61 to 110)   | 0.4 (0.3 to 0.6) | -9.7 (-27.9 to 15.4)  | 66 (50 to 88)    | 0.4 (0.3 to 0.5) | -13.5 (-30.5 to 8.7)   | 1620 (1180 to 2210)   | 8.9 (6.4 to 12.2)     | -12.8 (-31.6 to 11.8)  |
| Democratic Republic of the Congo | Both   | 447 (333 to 593) | 1.2 (0.9 to 1.6) | -2.4 (-21.8 to 21.8)  | 421 (314 to 555) | 1.2 (0.9 to 1.5) | -4.1 (-22.9 to 18.4)   | 12300 (9090 to 16600) | 30.4 (22.7 to 40.1)   | -4.4 (-24.4 to 20.2)   |
|                                  | Male   | 367 (265 to 497) | 2.2 (1.7 to 2.9) | -3.9 (-24.1 to 21.7)  | 346 (252 to 468) | 2.2 (1.7 to 2.9) | -5.3 (-24.6 to 19.4)   | 10200 (7250 to 14000) | 55.1 (40 to 73.9)     | -5.9 (-27 to 21)       |
|                                  | Female | 80 (59 to 107)   | 0.4 (0.3 to 0.5) | -7 (-27.2 to 19.8)    | 75 (55 to 100)   | 0.4 (0.3 to 0.5) | -8.4 (-28.6 to 17.8)   | 2190 (1570 to 2970)   | 10 (7.2 to 13.4)      | -9.5 (-30.5 to 17.5)   |
| Denmark                          | Both   | 276 (213 to 358) | 2.6 (2 to 3.4)   | -14.1 (-34.1 to 11.7) | 102 (92 to 113)  | 0.9 (0.8 to 1)   | -20.2 (-28.1 to -11.5) | 2360 (2130 to 2630)   | 23.1 (20.8 to 25.8)   | -21.4 (-29.7 to -11.9) |
|                                  | Male   | 229 (174 to 299) | 4.5 (3.4 to 5.9) | -15.5 (-35.8 to 10.9) | 83 (73 to 92)    | 1.6 (1.4 to 1.8) | -21.8 (-30.7 to -12.7) | 1930 (1700 to 2160)   | 38.9 (34.6 to 43.6)   | -22.7 (-32 to -12.6)   |
|                                  | Female | 47 (35 to 63)    | 0.9 (0.7 to 1.2) | -11.9 (-34.8 to 20)   | 20 (16 to 23)    | 0.3 (0.3 to 0.4) | -18.6 (-30.1 to -6.1)  | 439 (366 to 522)      | 8.3 (7 to 9.9)        | -18 (-30 to -4.5)      |
| Djibouti                         | Both   | 10 (7 to 14)     | 1.5 (1.1 to 2.1) | -5.5 (-25.7 to 20.5)  | 9 (6 to 12)      | 1.4 (1 to 1.9)   | -8.3 (-27.5 to 16.7)   | 264 (178 to 386)      | 36.2 (25.6 to 52.5)   | -10 (-30.9 to 16)      |
|                                  | Male   | 8 (5 to 12)      | 2.2 (1.6 to 3.3) | -6.9 (-26.8 to 18.3)  | 7 (5 to 11)      | 2.1 (1.5 to 3.1) | -9.7 (-28.6 to 13.6)   | 220 (144 to 326)      | 55.2 (37.7 to 81.9)   | -10.8 (-31.4 to 15.2)  |
|                                  | Female | 2 (1 to 2)       | 0.5 (0.4 to 0.7) | -4.6 (-27.7 to 29.2)  | 1 (1 to 2)       | 0.5 (0.4 to 0.7) | -7.8 (-29.6 to 24.4)   | 44 (29 to 66)         | 13 (8.9 to 18.8)      | -9.2 (-33.7 to 25.5)   |
| Dominica                         | Both   | 3 (2 to 3)       | 2.9 (2.2 to 3.6) | 4.2 (-15.8 to 30.3)   | 2 (2 to 3)       | 2.4 (1.9 to 3)   | 5.1 (-14.3 to 30)      | 52 (40 to 65)         | 57.8 (45.1 to 72.4)   | 4.4 (-16.1 to 31.2)    |
|                                  | Male   | 2 (2 to 3)       | 5 (3.9 to 6.4)   | 2.3 (-18.8 to 29.2)   | 2 (1 to 2)       | 4.3 (3.3 to 5.4) | 2.2 (-18.3 to 27.8)    | 46 (35 to 58)         | 101.3 (77.7 to 128.5) | 3.4 (-18.2 to 32.1)    |
|                                  | Female | 0 (0 to 0)       | 0.7 (0.6 to 0.9) | -0.8 (-20.7 to 25.6)  | 0 (0 to 0)       | 0.6 (0.5 to 0.8) | 0.2 (-19.2 to 25.6)    | 6 (5 to 8)            | 13.5 (10.6 to 17.1)   | -0.2 (-19.9 to 26.2)   |
| Dominican Republic               | Both   | 231 (174 to 304) | 2.5 (1.9 to 3.2) | 26.7 (-10.1 to 76.2)  | 190 (145 to 245) | 2.1 (1.6 to 2.7) | 21.8 (-11 to 67.8)     | 4810 (3570 to 6370)   | 50.1 (37.5 to 66.2)   | 25.8 (-11.3 to 77.3)   |
|                                  | Male   | 190 (142 to 253) | 4.2 (3.2 to 5.6) | 30.8 (-7.8 to 85.1)   | 155 (117 to 204) | 3.5 (2.7 to 4.6) | 25.8 (-10.3 to 74.9)   | 3970 (2940 to 5370)   | 85.3 (63.6 to 115)    | 30 (-9.3 to 86.4)      |
|                                  | Female | 41 (31 to 55)    | 0.9 (0.7 to 1.1) | 15.4 (-15.9 to 60.7)  | 35 (27 to 45)    | 0.7 (0.6 to 1)   | 10.9 (-17.5 to 52.1)   | 835 (615 to 1120)     | 16.9 (12.5 to 22.7)   | 13.1 (-19.4 to 58.6)   |
| Ecuador                          | Both   | 132 (103 to 172) | 0.9 (0.7 to 1.2) | -1.1 (-24.8 to 29.4)  | 108 (84 to 140)  | 0.7 (0.6 to 1)   | -6.1 (-27.4 to 21.6)   | 2410 (1850 to 3150)   | 15.7 (12.2 to 20.6)   | -9.6 (-31.8 to 19.4)   |
|                                  | Male   | 107 (81 to 142)  | 1.5 (1.2 to 2)   | -0.5 (-25 to 32.2)    | 88 (68 to 115)   | 1.3 (1 to 1.7)   | -5.2 (-28.3 to 24.4)   | 1950 (1480 to 2590)   | 26.7 (20.3 to 35.5)   | -9.2 (-32.5 to 22.1)   |

|                   |        |                   |                   |                       |                  |                  |                       |                        |                       |                       |
|-------------------|--------|-------------------|-------------------|-----------------------|------------------|------------------|-----------------------|------------------------|-----------------------|-----------------------|
|                   | Female | 25 (19 to 33)     | 0.3 (0.2 to 0.4)  | 0.6 (-22.8 to 31.7)   | 20 (16 to 26)    | 0.3 (0.2 to 0.3) | -4.9 (-26.3 to 23.7)  | 462 (350 to 601)       | 5.7 (4.4 to 7.5)      | -8.1 (-31.2 to 20.8)  |
| Egypt             | Both   | 912 (676 to 1250) | 1.3 (1 to 1.8)    | -1.2 (-24.9 to 28.9)  | 663 (492 to 926) | 1 (0.8 to 1.4)   | -8.5 (-29.6 to 18.2)  | 20300 (14900 to 27500) | 27.2 (20.1 to 37.4)   | -9.2 (-31.4 to 19.2)  |
|                   | Male   | 756 (544 to 1060) | 2 (1.5 to 2.9)    | -3.1 (-27.2 to 28.3)  | 555 (398 to 802) | 1.5 (1.1 to 2.3) | -10.6 (-32.4 to 17)   | 16800 (12000 to 23200) | 42.3 (30.4 to 59.2)   | -10.7 (-33.2 to 18.1) |
|                   | Female | 156 (112 to 214)  | 0.5 (0.3 to 0.6)  | 3.5 (-23.8 to 35.2)   | 108 (79 to 148)  | 0.4 (0.3 to 0.5) | -5.3 (-28.8 to 23.5)  | 3520 (2530 to 4850)    | 9.9 (7.1 to 13.5)     | -4.7 (-30.7 to 26.9)  |
| El Salvador       | Both   | 60 (45 to 78)     | 1 (0.8 to 1.3)    | 7.5 (-19.6 to 40.9)   | 46 (35 to 60)    | 0.8 (0.6 to 1)   | 1.3 (-23.6 to 31.1)   | 1080 (806 to 1430)     | 18.5 (13.7 to 24.5)   | 0.7 (-25.3 to 32.5)   |
|                   | Male   | 47 (35 to 62)     | 1.9 (1.4 to 2.5)  | 12.7 (-16.8 to 48.7)  | 37 (28 to 48)    | 1.5 (1.1 to 1.9) | 5.7 (-21.6 to 38.6)   | 859 (630 to 1140)      | 34.6 (25.3 to 45.9)   | 6.2 (-21.7 to 41.8)   |
|                   | Female | 12 (9 to 17)      | 0.4 (0.3 to 0.5)  | -1.2 (-26.5 to 30.3)  | 10 (7 to 12)     | 0.3 (0.2 to 0.4) | -5.9 (-28.7 to 21.6)  | 224 (163 to 300)       | 6.6 (4.8 to 8.8)      | -9.3 (-33.3 to 20.2)  |
| Equatorial Guinea | Both   | 6 (4 to 9)        | 1.3 (0.9 to 1.9)  | 10.7 (-13.5 to 42.9)  | 5 (4 to 8)       | 1.2 (0.8 to 1.8) | 7.3 (-15 to 35.9)     | 145 (94 to 225)        | 27.8 (18.7 to 42.8)   | 5.9 (-18.7 to 40)     |
|                   | Male   | 5 (3 to 8)        | 2.5 (1.7 to 3.9)  | 14.2 (-11.1 to 46.3)  | 4 (3 to 7)       | 2.4 (1.6 to 3.7) | 10.3 (-12.4 to 39.7)  | 119 (76 to 188)        | 55.1 (36.7 to 86.4)   | 9.7 (-15.8 to 43.9)   |
|                   | Female | 1 (1 to 2)        | 0.4 (0.2 to 0.6)  | -6.4 (-31.6 to 30.8)  | 1 (1 to 1)       | 0.3 (0.2 to 0.5) | -9.1 (-32.5 to 25.3)  | 26 (16 to 42)          | 8.4 (5.3 to 13.1)     | -12.1 (-37.8 to 27.4) |
| Eritrea           | Both   | 45 (31 to 62)     | 1.4 (1 to 2)      | -5.3 (-21.2 to 15.4)  | 41 (29 to 57)    | 1.4 (1 to 1.9)   | -7.2 (-22.3 to 12.3)  | 1340 (922 to 1880)     | 39.2 (27.7 to 53.9)   | -8.4 (-24.4 to 12.7)  |
|                   | Male   | 33 (23 to 47)     | 2.5 (1.7 to 3.4)  | -9 (-25.2 to 12.3)    | 30 (21 to 43)    | 2.4 (1.7 to 3.3) | -10.7 (-26.1 to 10.2) | 1000 (669 to 1460)     | 65.9 (45.2 to 92.5)   | -12.1 (-28.6 to 9.8)  |
|                   | Female | 12 (8 to 16)      | 0.7 (0.5 to 1)    | -1.7 (-24.5 to 24.7)  | 11 (7 to 15)     | 0.7 (0.5 to 0.9) | -3.5 (-25.5 to 22.5)  | 338 (228 to 484)       | 18.4 (12.7 to 25.8)   | -4.7 (-27.1 to 22.6)  |
| Estonia           | Both   | 89 (67 to 116)    | 3.9 (2.9 to 5.1)  | 1 (-25.1 to 32)       | 32 (24 to 41)    | 1.3 (1 to 1.7)   | -13 (-34.4 to 12.1)   | 819 (620 to 1060)      | 37 (28.1 to 47.9)     | -13.3 (-35.1 to 13)   |
|                   | Male   | 85 (64 to 112)    | 8.8 (6.6 to 11.5) | -2.8 (-27.6 to 26.6)  | 30 (23 to 38)    | 3.1 (2.4 to 4)   | -16.3 (-36.6 to 7.7)  | 769 (580 to 997)       | 80.6 (61.1 to 104.3)  | -16.3 (-37.4 to 8.7)  |
|                   | Female | 4 (3 to 5)        | 0.3 (0.2 to 0.4)  | -9.5 (-33.8 to 20.3)  | 2 (2 to 3)       | 0.1 (0.1 to 0.2) | -19.4 (-39.6 to 5.2)  | 50 (38 to 67)          | 3.9 (2.9 to 5.3)      | -19.6 (-41.2 to 6.6)  |
| eSwatini          | Both   | 14 (11 to 20)     | 2.4 (1.8 to 3.2)  | -14.1 (-30.7 to 8.3)  | 13 (10 to 18)    | 2.2 (1.6 to 2.9) | -17.6 (-32.9 to 3.1)  | 390 (278 to 543)       | 59.9 (43.7 to 82.7)   | -18.9 (-35.5 to 5.2)  |
|                   | Male   | 12 (9 to 17)      | 5 (3.8 to 6.6)    | -10.3 (-27 to 11.9)   | 11 (8 to 15)     | 4.7 (3.6 to 6.1) | -13.7 (-29.5 to 6.8)  | 336 (243 to 469)       | 123.6 (92.1 to 167.2) | -16 (-32.9 to 7.5)    |
|                   | Female | 2 (1 to 3)        | 0.6 (0.4 to 0.9)  | -20.6 (-43.1 to 16.2) | 2 (1 to 3)       | 0.6 (0.4 to 0.9) | -22.7 (-43.9 to 11.8) | 54 (31 to 85)          | 14.5 (8.6 to 22.8)    | -25.8 (-48.6 to 12.2) |
| Ethiopia          | Both   | 407 (326 to 546)  | 1 (0.8 to 1.3)    | -9.2 (-25.3 to 12.3)  | 382 (304 to 514) | 0.9 (0.7 to 1.3) | -11.4 (-27.8 to 8.5)  | 10900 (8600 to 14400)  | 23.6 (18.8 to 31.5)   | -13.2 (-29.8 to 7.2)  |



|            |        |                     |                    |                       |                     |                  |                       |                        |                        |                       |
|------------|--------|---------------------|--------------------|-----------------------|---------------------|------------------|-----------------------|------------------------|------------------------|-----------------------|
|            | Male   | 344 (262 to 483)    | 1.6 (1.2 to 2.2)   | -7 (-26.6 to 18.3)    | 324 (246 to 454)    | 1.5 (1.2 to 2.2) | -9.2 (-28.7 to 14.3)  | 9120 (6890 to 12700)   | 39.1 (29.6 to 54.5)    | -11.2 (-30.8 to 13.2) |
|            | Female | 64 (50 to 77)       | 0.3 (0.2 to 0.4)   | -8.2 (-25.3 to 13.9)  | 58 (46 to 69)       | 0.3 (0.2 to 0.3) | -10.4 (-27 to 7.6)    | 1750 (1370 to 2130)    | 7.4 (5.9 to 8.9)       | -13.5 (-30.9 to 6.1)  |
| Fiji       | Both   | 6 (5 to 8)          | 0.9 (0.7 to 1.1)   | 3.1 (-18.9 to 30.7)   | 5 (4 to 7)          | 0.8 (0.6 to 1)   | 1.6 (-19 to 27.7)     | 136 (103 to 176)       | 17.6 (13.6 to 22.4)    | -1.7 (-23.2 to 25.6)  |
|            | Male   | 5 (4 to 7)          | 1.8 (1.3 to 2.2)   | 8.4 (-14.3 to 39)     | 4 (3 to 6)          | 1.7 (1.3 to 2.1) | 6.4 (-15 to 35.1)     | 113 (84 to 146)        | 32.9 (25 to 41.9)      | 3.9 (-18.9 to 34.4)   |
|            | Female | 1 (1 to 1)          | 0.2 (0.2 to 0.3)   | -16.8 (-38.5 to 12.8) | 1 (1 to 1)          | 0.2 (0.1 to 0.3) | -18.9 (-39.1 to 8.2)  | 23 (17 to 32)          | 5.4 (4 to 7.2)         | -19.5 (-40.5 to 9)    |
| Finland    | Both   | 159 (120 to 206)    | 1.5 (1.1 to 1.9)   | -6.7 (-30.1 to 24.2)  | 45 (41 to 51)       | 0.4 (0.3 to 0.4) | -11.7 (-21 to -1.3)   | 1040 (916 to 1170)     | 10 (8.8 to 11.3)       | -13.6 (-24.1 to -1.7) |
|            | Male   | 135 (100 to 176)    | 2.7 (2 to 3.5)     | -9.2 (-32.9 to 20.8)  | 40 (35 to 45)       | 0.7 (0.7 to 0.8) | -14.9 (-24.7 to -3.8) | 909 (798 to 1030)      | 18.3 (16.1 to 20.9)    | -15.8 (-26.8 to -3.3) |
|            | Female | 24 (18 to 32)       | 0.4 (0.3 to 0.6)   | -3 (-28.1 to 28.9)    | 6 (4 to 7)          | 0.1 (0.1 to 0.1) | -7.2 (-19.7 to 8)     | 128 (103 to 155)       | 2.4 (2 to 2.9)         | -7.9 (-20.5 to 8.3)   |
| France     | Both   | 4930 (3740 to 6460) | 4.3 (3.3 to 5.7)   | -2.2 (-26.4 to 28.6)  | 1810 (1630 to 1990) | 1.5 (1.3 to 1.6) | -8.1 (-16.8 to 2.4)   | 44300 (39600 to 49400) | 40.1 (35.8 to 45)      | -9.5 (-18.8 to 2.2)   |
|            | Male   | 4470 (3360 to 5880) | 8.3 (6.2 to 11)    | -3.5 (-27.8 to 27.6)  | 1580 (1420 to 1760) | 2.8 (2.5 to 3.1) | -10.1 (-19.5 to 1)    | 39000 (34700 to 44100) | 74.5 (66.1 to 84.3)    | -10.9 (-21.4 to 2.1)  |
|            | Female | 467 (323 to 615)    | 0.8 (0.5 to 1)     | 5 (-21.2 to 40.4)     | 228 (175 to 265)    | 0.3 (0.2 to 0.4) | -1.4 (-13.6 to 13.6)  | 5230 (3720 to 6170)    | 9.2 (6.5 to 10.9)      | -1.6 (-15 to 15.8)    |
| Gabon      | Both   | 21 (15 to 28)       | 1.9 (1.4 to 2.6)   | -3.9 (-22.5 to 20.8)  | 18 (13 to 25)       | 1.7 (1.3 to 2.4) | -6.7 (-24.4 to 16.8)  | 510 (368 to 687)       | 44 (32.3 to 59.2)      | -9.4 (-28.7 to 17.1)  |
|            | Male   | 19 (13 to 25)       | 3.7 (2.7 to 5.1)   | -3.6 (-22.3 to 20.2)  | 16 (12 to 22)       | 3.4 (2.6 to 4.8) | -6.5 (-23.8 to 16.6)  | 460 (326 to 628)       | 83.4 (60.4 to 113.6)   | -8.4 (-27.5 to 17.2)  |
|            | Female | 2 (1 to 3)          | 0.4 (0.3 to 0.5)   | -12.4 (-34.3 to 15.6) | 2 (1 to 3)          | 0.3 (0.2 to 0.5) | -14.8 (-35.2 to 10.6) | 50 (34 to 72)          | 8.3 (5.8 to 11.8)      | -17.6 (-40.2 to 11)   |
| The Gambia | Both   | 7 (5 to 8)          | 0.7 (0.6 to 0.9)   | 5.1 (-15.8 to 31.8)   | 6 (5 to 8)          | 0.7 (0.5 to 0.9) | 3.4 (-16.2 to 29)     | 172 (131 to 221)       | 16.9 (13 to 21.2)      | 2.9 (-19.1 to 31.3)   |
|            | Male   | 6 (4 to 7)          | 1.3 (1 to 1.6)     | 5.3 (-16.6 to 34.1)   | 6 (4 to 7)          | 1.3 (1 to 1.6)   | 3.5 (-17 to 30.8)     | 147 (111 to 190)       | 29.7 (22.8 to 37.4)    | 3.3 (-19.1 to 33.3)   |
|            | Female | 1 (1 to 1)          | 0.2 (0.1 to 0.3)   | 8.4 (-18.5 to 43.5)   | 1 (1 to 1)          | 0.2 (0.1 to 0.2) | 6.1 (-19.6 to 39.1)   | 25 (18 to 34)          | 4.6 (3.3 to 6.3)       | 6.3 (-22.1 to 42.7)   |
| Georgia    | Both   | 261 (211 to 318)    | 4.6 (3.8 to 5.6)   | 2.1 (-19.1 to 27.5)   | 200 (164 to 243)    | 3.5 (2.8 to 4.2) | -1.1 (-21.2 to 21.4)  | 5400 (4370 to 6600)    | 98.7 (80.2 to 120.7)   | -1.9 (-22.7 to 22.6)  |
|            | Male   | 246 (198 to 301)    | 10.1 (8.2 to 12.3) | 3.5 (-18.3 to 29.7)   | 189 (153 to 229)    | 7.7 (6.3 to 9.4) | 0.5 (-20.3 to 24.4)   | 5130 (4120 to 6300)    | 212.2 (171.9 to 258.9) | -0.8 (-22.4 to 24.2)  |
|            | Female | 14 (11 to 23)       | 0.5 (0.4 to 0.7)   | -21.9 (-38.3 to -0.2) | 12 (9 to 19)        | 0.3 (0.3 to 0.5) | -24.3 (-40.4 to -3.7) | 271 (212 to 439)       | 9 (7 to 14.3)          | -25.5 (-42.2 to -4.6) |

|           |        |                        |                   |                       |                        |                  |                        |                           |                      |                        |
|-----------|--------|------------------------|-------------------|-----------------------|------------------------|------------------|------------------------|---------------------------|----------------------|------------------------|
| Germany   | Both   | 3520<br>(2740 to 4610) | 2.1 (1.6 to 2.8)  | -7.3 (-29.2 to 23)    | 1670<br>(1530 to 1830) | 0.9 (0.9 to 1)   | -11.9 (-19.5 to -2.6)  | 38200<br>(34900 to 41900) | 23.7 (21.6 to 25.9)  | -14.3 (-22.1 to -5)    |
|           | Male   | 3090<br>(2390 to 4070) | 3.9 (3 to 5.1)    | -9.2 (-30.6 to 21)    | 1440<br>(1310 to 1580) | 1.7 (1.6 to 1.9) | -14.3 (-22.5 to -4.9)  | 33000<br>(29800 to 36500) | 42.6 (38.4 to 46.9)  | -16.3 (-24.9 to -6.4)  |
|           | Female | 436 (311 to 570)       | 0.5 (0.4 to 0.7)  | -0.4 (-25.1 to 32.1)  | 235 (174 to 269)       | 0.2 (0.2 to 0.3) | -4.6 (-15.7 to 8.4)    | 5220 (3760 to 5940)       | 6.4 (4.6 to 7.3)     | -5.2 (-16.9 to 8.1)    |
| Ghana     | Both   | 261 (201 to 335)       | 1.6 (1.3 to 2.1)  | 0.5 (-18.3 to 25)     | 237 (183 to 301)       | 1.5 (1.2 to 1.9) | -2.4 (-20.4 to 20.4)   | 6430 (4880 to 8360)       | 37.2 (28.8 to 47.8)  | -3.3 (-22.5 to 22.4)   |
|           | Male   | 240 (183 to 310)       | 3.5 (2.7 to 4.4)  | 5.6 (-14.8 to 33.3)   | 217 (167 to 278)       | 3.3 (2.6 to 4.1) | 2.6 (-16.4 to 27.6)    | 5900 (4460 to 7720)       | 77.6 (59.4 to 100.1) | 1.7 (-18.8 to 29.7)    |
|           | Female | 22 (16 to 28)          | 0.2 (0.2 to 0.3)  | -5.4 (-24.8 to 22.6)  | 19 (15 to 25)          | 0.2 (0.2 to 0.3) | -7.8 (-26.3 to 19.2)   | 525 (391 to 690)          | 5.4 (4.1 to 7)       | -9.9 (-29.3 to 17.6)   |
| Greece    | Both   | 897 (693 to 1140)      | 4.3 (3.3 to 5.4)  | -9.2 (-30.9 to 16.6)  | 407 (372 to 441)       | 1.7 (1.6 to 1.9) | -8.4 (-15.7 to -0.7)   | 8300 (7600 to 9060)       | 41 (37.5 to 44.8)    | -9.4 (-17.3 to -0.9)   |
|           | Male   | 833 (641 to 1060)      | 8.5 (6.5 to 10.8) | -9.6 (-31.4 to 17)    | 368 (334 to 401)       | 3.4 (3.1 to 3.7) | -8.5 (-16.1 to -0.2)   | 7570 (6890 to 8310)       | 79.8 (72.4 to 87.6)  | -10 (-18.2 to -0.8)    |
|           | Female | 64 (48 to 82)          | 0.6 (0.4 to 0.7)  | -2.5 (-24.7 to 26.8)  | 39 (31 to 45)          | 0.3 (0.2 to 0.3) | -3.3 (-13 to 7.8)      | 722 (621 to 814)          | 6.7 (5.9 to 7.5)     | -2.1 (-12.2 to 9.9)    |
| Greenland | Both   | 2 (1 to 2)             | 2.1 (1.7 to 2.6)  | -9.2 (-25.3 to 9.7)   | 1 (1 to 1)             | 1.5 (1.1 to 1.8) | -14 (-30.1 to 4.2)     | 28 (21 to 35)             | 36.4 (28.3 to 44.9)  | -16.3 (-32.6 to 2.3)   |
|           | Male   | 1 (1 to 2)             | 3.7 (2.9 to 4.5)  | -9.1 (-25.6 to 9.5)   | 1 (1 to 1)             | 2.6 (2.1 to 3.2) | -14.1 (-30.9 to 4.4)   | 26 (20 to 33)             | 63.1 (48.9 to 78.1)  | -15.5 (-32.4 to 4.5)   |
|           | Female | 0 (0 to 0)             | 0.3 (0.2 to 0.4)  | -17.2 (-35.1 to 5.9)  | 0 (0 to 0)             | 0.2 (0.2 to 0.2) | -22.9 (-39.9 to -2.3)  | 2 (1 to 2)                | 5.1 (4 to 6.5)       | -23.8 (-41.3 to -3.1)  |
| Grenada   | Both   | 2 (2 to 2)             | 1.6 (1.4 to 1.8)  | -20.8 (-32.3 to -6.9) | 1 (1 to 2)             | 1.2 (1.1 to 1.4) | -24.5 (-34.8 to -12.2) | 36 (31 to 41)             | 30.3 (26.3 to 34.7)  | -23.7 (-35.8 to -9.9)  |
|           | Male   | 2 (1 to 2)             | 2.9 (2.6 to 3.4)  | -31.4 (-41.7 to -19)  | 1 (1 to 1)             | 2.4 (2.1 to 2.7) | -36.3 (-45.3 to -26)   | 32 (27 to 37)             | 55.1 (47.9 to 63.4)  | -31.8 (-42.5 to -19.1) |
|           | Female | 0 (0 to 0)             | 0.4 (0.3 to 0.5)  | -16.7 (-31.7 to 4.8)  | 0 (0 to 0)             | 0.3 (0.3 to 0.4) | -19.7 (-34.1 to 0.5)   | 4 (3 to 5)                | 7.1 (5.9 to 8.6)     | -20.2 (-35.2 to 0.2)   |
| Guam      | Both   | 1 (1 to 1)             | 0.5 (0.4 to 0.7)  | -28.7 (-43.5 to -6)   | 1 (1 to 1)             | 0.4 (0.3 to 0.5) | -28.9 (-43.4 to -7.2)  | 17 (14 to 22)             | 9.1 (7.3 to 11.7)    | -28 (-42.7 to -5.9)    |
|           | Male   | 1 (1 to 1)             | 0.9 (0.7 to 1.2)  | -33.4 (-47.6 to -7.3) | 1 (0 to 1)             | 0.7 (0.5 to 0.9) | -33.6 (-47.6 to -7.4)  | 13 (11 to 17)             | 14.5 (11.5 to 18.8)  | -32.9 (-47.6 to -6.8)  |
|           | Female | 0 (0 to 0)             | 0.2 (0.2 to 0.3)  | -5.7 (-27.8 to 21.8)  | 0 (0 to 0)             | 0.1 (0.1 to 0.2) | -3.5 (-25.3 to 24.6)   | 4 (3 to 5)                | 4.1 (3.2 to 5.2)     | -6.7 (-28 to 20.8)     |
| Guatemala | Both   | 91 (72 to 116)         | 0.8 (0.7 to 1)    | -15.3 (-35.9 to 11.6) | 81 (64 to 101)         | 0.8 (0.6 to 0.9) | -16.6 (-36.4 to 7.4)   | 1990 (1560 to 2520)       | 16.9 (13.3 to 21.5)  | -17.9 (-38.8 to 8.9)   |
|           | Male   | 65 (51 to 83)          | 1.3 (1 to 1.7)    | -14.4 (-36.8 to 13.3) | 58 (46 to 74)          | 1.2 (1 to 1.6)   | -15.2 (-36.4 to 11)    | 1400 (1080 to 1780)       | 26.7 (20.7 to 33.9)  | -17.2 (-39.4 to 10.5)  |

|               |        |                   |                    |                       |                  |                  |                       |                        |                       |                        |
|---------------|--------|-------------------|--------------------|-----------------------|------------------|------------------|-----------------------|------------------------|-----------------------|------------------------|
|               | Female | 26 (20 to 35)     | 0.4 (0.3 to 0.6)   | -13.8 (-34.5 to 15.4) | 22 (17 to 29)    | 0.4 (0.3 to 0.5) | -16.1 (-35.2 to 9.2)  | 590 (455 to 783)       | 9 (7 to 11.9)         | -16.2 (-36.6 to 11)    |
| Guinea        | Both   | 74 (54 to 99)     | 1.4 (1 to 1.8)     | 1.2 (-18.5 to 27.9)   | 73 (53 to 96)    | 1.4 (1 to 1.8)   | 0 (-19 to 23.5)       | 1890 (1350 to 2530)    | 33.1 (23.8 to 44.1)   | -1.5 (-22.2 to 24.1)   |
|               | Male   | 66 (47 to 89)     | 2.4 (1.7 to 3.2)   | -0.3 (-20.8 to 26.4)  | 65 (46 to 87)    | 2.4 (1.8 to 3.2) | -1.7 (-21.5 to 22.5)  | 1690 (1170 to 2290)    | 58.3 (40.8 to 78.4)   | -2.4 (-23.9 to 24.3)   |
|               | Female | 8 (6 to 10)       | 0.3 (0.2 to 0.4)   | -2.1 (-24 to 23.4)    | 8 (5 to 10)      | 0.3 (0.2 to 0.4) | -2.7 (-23.3 to 22.6)  | 205 (146 to 274)       | 7 (5 to 9.3)          | -4.2 (-25.6 to 21.3)   |
| Guinea-Bissau | Both   | 14 (10 to 18)     | 1.9 (1.3 to 2.4)   | -6.7 (-24.9 to 16.6)  | 13 (9 to 17)     | 1.8 (1.3 to 2.3) | -7.2 (-25.1 to 15.5)  | 371 (257 to 487)       | 46.6 (32.4 to 60.5)   | -8.8 (-27.8 to 15.6)   |
|               | Male   | 12 (8 to 16)      | 3.8 (2.7 to 4.8)   | -6.2 (-24.4 to 17.6)  | 12 (8 to 15)     | 3.7 (2.6 to 4.7) | -6.6 (-23.9 to 16.8)  | 333 (223 to 444)       | 91.8 (63 to 119.3)    | -8.2 (-27.2 to 17.6)   |
|               | Female | 1 (1 to 2)        | 0.3 (0.3 to 0.5)   | -7.8 (-28.7 to 19.2)  | 1 (1 to 2)       | 0.3 (0.2 to 0.4) | -8.4 (-28.4 to 17.8)  | 38 (27 to 50)          | 8.5 (6.2 to 11.1)     | -11.4 (-31.8 to 16.3)  |
| Guyana        | Both   | 9 (7 to 12)       | 1.4 (1.1 to 1.8)   | 0.3 (-25.6 to 32.6)   | 8 (6 to 10)      | 1.2 (0.9 to 1.6) | -3.4 (-27.9 to 27.4)  | 223 (165 to 293)       | 32.1 (24 to 41.8)     | -3.3 (-28.8 to 30)     |
|               | Male   | 8 (6 to 11)       | 2.7 (2 to 3.5)     | 1.5 (-25 to 34.3)     | 7 (5 to 9)       | 2.4 (1.8 to 3)   | -1.9 (-27.2 to 29.6)  | 201 (148 to 265)       | 60.6 (45.1 to 79.3)   | -2.2 (-28.7 to 32.6)   |
|               | Female | 1 (1 to 1)        | 0.3 (0.2 to 0.4)   | 1.4 (-25.2 to 36.5)   | 1 (1 to 1)       | 0.3 (0.2 to 0.3) | -2.5 (-26.4 to 29.4)  | 23 (17 to 30)          | 6.3 (4.7 to 8.3)      | -2.4 (-28.7 to 32.7)   |
| Haiti         | Both   | 174 (103 to 252)  | 2.5 (1.5 to 3.5)   | 0.3 (-19.4 to 25.2)   | 165 (98 to 237)  | 2.5 (1.5 to 3.4) | -1.3 (-19.9 to 22.5)  | 4530 (2650 to 6610)    | 59.9 (35.4 to 86.8)   | -1.4 (-21.2 to 24.4)   |
|               | Male   | 152 (88 to 219)   | 4.6 (2.7 to 6.6)   | 2.9 (-18.8 to 33.2)   | 144 (84 to 208)  | 4.6 (2.7 to 6.5) | 1.2 (-19.9 to 29.1)   | 3930 (2250 to 5730)    | 110.9 (64.6 to 160.1) | 1.4 (-21 to 32.5)      |
|               | Female | 23 (14 to 33)     | 0.6 (0.4 to 0.9)   | -6.7 (-27.8 to 21.9)  | 21 (13 to 30)    | 0.6 (0.4 to 0.8) | -8.1 (-28.1 to 18.2)  | 601 (373 to 891)       | 14.5 (9.1 to 21.3)    | -9.4 (-29.7 to 17.2)   |
| Honduras      | Both   | 87 (66 to 108)    | 1.5 (1.1 to 1.8)   | 12.4 (-8.3 to 41.5)   | 76 (58 to 94)    | 1.3 (1 to 1.6)   | 8.5 (-9.8 to 34.3)    | 1860 (1410 to 2370)    | 29.9 (22.9 to 37.6)   | 6.8 (-14.7 to 36.3)    |
|               | Male   | 62 (46 to 77)     | 2.2 (1.6 to 2.7)   | 18.9 (-8.8 to 59.8)   | 54 (40 to 67)    | 2 (1.5 to 2.4)   | 15.8 (-10.4 to 52.2)  | 1330 (981 to 1680)     | 45.3 (33.7 to 57)     | 12.3 (-16.2 to 52.2)   |
|               | Female | 25 (19 to 33)     | 0.8 (0.6 to 1.1)   | 2.6 (-20 to 31.2)     | 22 (17 to 29)    | 0.8 (0.6 to 1)   | -2.6 (-23.7 to 24.6)  | 535 (392 to 723)       | 16.2 (12 to 21.5)     | -1.2 (-24.6 to 29)     |
| Hungary       | Both   | 899 (723 to 1110) | 5.4 (4.3 to 6.7)   | -19.5 (-36.2 to 1.3)  | 488 (398 to 594) | 2.8 (2.3 to 3.4) | -25.1 (-39.8 to -7)   | 13300 (10800 to 16500) | 82.2 (65.8 to 102.2)  | -26.9 (-41.6 to -8.2)  |
|               | Male   | 773 (618 to 955)  | 10.3 (8.2 to 12.8) | -22 (-38.6 to -1.9)   | 424 (345 to 518) | 5.6 (4.5 to 6.8) | -27.1 (-41.5 to -9.3) | 11700 (9350 to 14400)  | 157 (124.7 to 195.6)  | -28.9 (-43.8 to -10.6) |
|               | Female | 126 (93 to 160)   | 1.4 (1 to 1.8)     | -11.4 (-32.1 to 12.5) | 64 (48 to 79)    | 0.6 (0.5 to 0.8) | -19.4 (-37.1 to 0.7)  | 1690 (1200 to 2120)    | 19.3 (13.3 to 24.3)   | -19.3 (-38.3 to 0.8)   |
| Iceland       | Both   | 7 (6 to 9)        | 1.4 (1.2 to 1.7)   | -2.2 (-18.7 to 17.9)  | 3 (2 to 3)       | 0.5 (0.4 to 0.5) | -8.7 (-20.3 to 5.2)   | 60 (53 to 70)          | 11.9 (10.4 to 13.8)   | -5.4 (-18.4 to 9.9)    |

|           |        |                           |                  |                       |                           |                  |                       |                               |                       |                       |
|-----------|--------|---------------------------|------------------|-----------------------|---------------------------|------------------|-----------------------|-------------------------------|-----------------------|-----------------------|
|           | Male   | 6 (5 to 8)                | 2.5 (2.1 to 3)   | -3.4 (-20.8 to 17.7)  | 2 (2 to 2)                | 0.8 (0.7 to 0.9) | -10.9 (-23.6 to 4)    | 50 (43 to 58)                 | 20 (17.2 to 23.3)     | -6.3 (-20.3 to 11)    |
|           | Female | 1 (1 to 1)                | 0.4 (0.3 to 0.5) | -1.2 (-22.1 to 23.9)  | 0 (0 to 1)                | 0.2 (0.1 to 0.2) | -6.1 (-20.8 to 11)    | 11 (8 to 13)                  | 4.2 (3.4 to 5)        | -5 (-20.5 to 14.7)    |
| India     | Both   | 34800<br>(28700 to 41800) | 2.9 (2.4 to 3.5) | -1.2 (-18.1 to 19.3)  | 29800<br>(25000 to 35600) | 2.6 (2.2 to 3.1) | -5.7 (-21.8 to 13.3)  | 840000<br>(705000 to 1010000) | 68.5 (57.5 to 82.2)   | -6.8 (-23.1 to 12.6)  |
|           | Male   | 29400<br>(23600 to 36200) | 5.1 (4.1 to 6.3) | -2.2 (-20.8 to 20.2)  | 25200<br>(20300 to 30700) | 4.5 (3.7 to 5.5) | -6.4 (-25 to 14.9)    | 708000<br>(574000 to 865000)  | 117.3 (94.9 to 143.1) | -8 (-26.7 to 13.7)    |
|           | Female | 5430<br>(4350 to 6670)    | 0.9 (0.7 to 1.1) | 10.8 (-10.6 to 38.9)  | 4610<br>(3660 to 5730)    | 0.8 (0.6 to 1)   | 5.4 (-15.4 to 30.3)   | 133000<br>(104000 to 166000)  | 21.3 (16.8 to 26.5)   | 4.7 (-16.2 to 30.4)   |
| Indonesia | Both   | 2590<br>(1950 to 3640)    | 1.2 (0.9 to 1.7) | 0.9 (-18.2 to 22.6)   | 2130<br>(1640 to 2850)    | 1.1 (0.8 to 1.4) | -3.8 (-21.3 to 15.5)  | 55500<br>(42500 to 74300)     | 24.2 (18.7 to 32.3)   | -6 (-24.3 to 15.4)    |
|           | Male   | 2130<br>(1510 to 3170)    | 2.1 (1.5 to 3.1) | 3.5 (-19.1 to 30.4)   | 1730<br>(1250 to 2470)    | 1.8 (1.4 to 2.6) | -1.4 (-22.7 to 23.7)  | 45000<br>(32400 to 64600)     | 41.2 (29.9 to 58.5)   | -3.8 (-25.5 to 24.4)  |
|           | Female | 466 (369 to 585)          | 0.4 (0.3 to 0.5) | -8.3 (-27.5 to 15.6)  | 405 (321 to 497)          | 0.4 (0.3 to 0.5) | -10.8 (-28.8 to 10.7) | 10500<br>(8170 to 13200)      | 8.9 (7 to 10.9)       | -14.1 (-33.2 to 9.6)  |
| Iran      | Both   | 2280<br>(2030 to 2530)    | 3.1 (2.8 to 3.4) | 13.6 (6.6 to 28.1)    | 1450<br>(1320 to 1610)    | 2.1 (1.9 to 2.3) | -1.2 (-7 to 10.6)     | 37100<br>(34100 to 41100)     | 48.1 (44.2 to 53.3)   | -2.2 (-7.8 to 8.8)    |
|           | Male   | 1760<br>(1560 to 1980)    | 4.8 (4.3 to 5.4) | 7.8 (-0.3 to 22.4)    | 1130<br>(1020 to 1270)    | 3.2 (2.9 to 3.6) | -6.2 (-12.5 to 6.1)   | 28800<br>(26000 to 32500)     | 75.1 (68 to 84.5)     | -7 (-13.2 to 4.9)     |
|           | Female | 517 (467 to 569)          | 1.4 (1.3 to 1.6) | 44.3 (32.8 to 59.7)   | 322 (296 to 352)          | 0.9 (0.8 to 1)   | 26.4 (18.2 to 40)     | 8240 (7650 to 8950)           | 21.3 (19.8 to 23.3)   | 22.4 (14.5 to 33.8)   |
| Iraq      | Both   | 750 (563 to 948)          | 3.2 (2.4 to 3.9) | 6.3 (-14.7 to 32.2)   | 530 (404 to 661)          | 2.4 (1.9 to 2.9) | -2.2 (-20.4 to 20.3)  | 14800<br>(11000 to 19000)     | 58.4 (44.2 to 73.4)   | -7.3 (-25.8 to 14.6)  |
|           | Male   | 562 (425 to 707)          | 5 (3.8 to 6.2)   | 8.3 (-14.7 to 36.5)   | 405 (310 to 504)          | 3.9 (3 to 4.7)   | 0.4 (-19.7 to 25.6)   | 10900<br>(8190 to 13800)      | 90.5 (69.1 to 113.1)  | -5.6 (-26.5 to 19.7)  |
|           | Female | 188 (137 to 252)          | 1.5 (1.1 to 1.9) | 2.6 (-21.8 to 36.5)   | 124 (92 to 163)           | 1 (0.8 to 1.3)   | -7.4 (-27.8 to 21.8)  | 3870 (2780 to 5260)           | 27.8 (20.4 to 36.9)   | -10.3 (-31.8 to 20.7) |
| Ireland   | Both   | 176 (133 to 232)          | 2.4 (1.8 to 3.2) | -10.2 (-32.1 to 18.6) | 62 (55 to 69)             | 0.8 (0.7 to 0.9) | -17.7 (-26.5 to -9.1) | 1450 (1290 to 1640)           | 20.3 (18 to 23)       | -19.5 (-28.6 to -9.8) |
|           | Male   | 155 (116 to 205)          | 4.4 (3.3 to 5.9) | -11 (-33.4 to 17.3)   | 52 (46 to 59)             | 1.5 (1.3 to 1.7) | -19 (-28.6 to -9.2)   | 1240 (1080 to 1410)           | 35.7 (31.1 to 40.5)   | -20.2 (-30.3 to -9.2) |

|            |        |                     |                  |                       |                     |                  |                        |                        |                     |                        |
|------------|--------|---------------------|------------------|-----------------------|---------------------|------------------|------------------------|------------------------|---------------------|------------------------|
|            | Female | 21 (15 to 28)       | 0.6 (0.4 to 0.8) | -8.4 (-32 to 20.5)    | 9 (8 to 12)         | 0.2 (0.2 to 0.3) | -17 (-28.9 to -1.4)    | 215 (180 to 263)       | 5.9 (4.9 to 7.2)    | -17 (-29.9 to -1.9)    |
| Israel     | Both   | 201 (153 to 259)    | 1.8 (1.4 to 2.3) | -7.4 (-30.2 to 20.4)  | 97 (87 to 107)      | 0.8 (0.7 to 0.9) | -12.7 (-21.5 to -3.2)  | 2080 (1860 to 2300)    | 18.9 (16.9 to 21)   | -14.3 (-23.5 to -4.5)  |
|            | Male   | 180 (136 to 233)    | 3.5 (2.6 to 4.5) | -10 (-32.5 to 18.1)   | 84 (74 to 93)       | 1.6 (1.4 to 1.8) | -15.3 (-24.9 to -4.6)  | 1810 (1600 to 2020)    | 35.2 (31 to 39.4)   | -16.9 (-27.1 to -6.4)  |
|            | Female | 21 (16 to 28)       | 0.4 (0.3 to 0.5) | 6.4 (-20.2 to 39)     | 13 (11 to 16)       | 0.2 (0.2 to 0.2) | -0.1 (-12.7 to 15)     | 266 (229 to 315)       | 4.5 (3.9 to 5.3)    | -0.3 (-12.8 to 14.8)   |
| Italy      | Both   | 4060 (3190 to 5070) | 3.3 (2.5 to 4.1) | -12.4 (-31.3 to 10.1) | 1720 (1590 to 1830) | 1.2 (1.1 to 1.3) | -15.3 (-18.8 to -11.1) | 35700 (33500 to 38000) | 29 (27.4 to 31)     | -16.5 (-20.2 to -12)   |
|            | Male   | 3580 (2710 to 4570) | 6.2 (4.7 to 7.9) | -14.4 (-35.1 to 10.3) | 1540 (1430 to 1640) | 2.5 (2.3 to 2.6) | -18.1 (-21.6 to -13.8) | 32100 (30100 to 34200) | 55.8 (52.7 to 59.5) | -18.3 (-22.4 to -13.7) |
|            | Female | 483 (363 to 619)    | 0.7 (0.5 to 0.9) | -5.6 (-27.6 to 23)    | 178 (147 to 204)    | 0.2 (0.2 to 0.3) | -10.6 (-16.2 to -1.8)  | 3620 (3120 to 4140)    | 5.6 (5 to 6.4)      | -10.5 (-16.5 to -1.7)  |
| Jamaica    | Both   | 50 (38 to 64)       | 1.7 (1.3 to 2.2) | -7.4 (-29.6 to 19.5)  | 38 (29 to 49)       | 1.3 (1 to 1.7)   | -7.1 (-29.1 to 18)     | 913 (696 to 1180)      | 31 (23.6 to 40.3)   | -6.9 (-29.2 to 21.3)   |
|            | Male   | 46 (35 to 60)       | 3.3 (2.5 to 4.2) | -9 (-31.6 to 17.7)    | 36 (27 to 46)       | 2.5 (1.9 to 3.2) | -9 (-30.9 to 17.7)     | 849 (645 to 1110)      | 58.9 (44.6 to 76.8) | -8.4 (-30.9 to 20)     |
|            | Female | 4 (3 to 5)          | 0.2 (0.2 to 0.3) | 14.9 (-11.6 to 48.9)  | 3 (2 to 4)          | 0.2 (0.1 to 0.2) | 16.3 (-9.5 to 49)      | 64 (49 to 86)          | 4.2 (3.2 to 5.6)    | 14.3 (-12.4 to 49)     |
| Japan      | Both   | 4650 (3800 to 5610) | 1.5 (1.2 to 1.8) | -12.5 (-27.9 to 5.7)  | 1210 (1070 to 1300) | 0.3 (0.3 to 0.3) | -14.9 (-18.1 to -10)   | 22500 (20400 to 24100) | 7.2 (6.7 to 7.8)    | -16.2 (-20 to -11.4)   |
|            | Male   | 4140 (3330 to 5070) | 2.8 (2.2 to 3.4) | -14.7 (-31.9 to 5.6)  | 1070 (951 to 1140)  | 0.6 (0.6 to 0.7) | -17.5 (-20.9 to -12.4) | 19800 (18100 to 21300) | 13.5 (12.4 to 14.5) | -18.3 (-22.7 to -13.1) |
|            | Female | 514 (395 to 653)    | 0.3 (0.3 to 0.4) | -6.1 (-24.5 to 17.3)  | 144 (112 to 172)    | 0.1 (0.1 to 0.1) | -11.9 (-16.2 to -4.7)  | 2690 (2270 to 3140)    | 1.8 (1.6 to 2.1)    | -10.9 (-15.6 to -3.7)  |
| Jordan     | Both   | 73 (56 to 96)       | 1.1 (0.8 to 1.5) | -11.5 (-32.2 to 14.2) | 45 (35 to 59)       | 0.7 (0.6 to 1)   | -21.2 (-39.1 to 0.2)   | 1230 (946 to 1610)     | 17 (13.1 to 22.4)   | -21.3 (-40.6 to 2)     |
|            | Male   | 64 (47 to 86)       | 1.8 (1.4 to 2.5) | -14.3 (-36.4 to 13.4) | 40 (29 to 53)       | 1.2 (0.9 to 1.7) | -23.1 (-42.9 to 0.5)   | 1080 (793 to 1450)     | 28.4 (21.1 to 38.5) | -24.1 (-44.1 to 1)     |
|            | Female | 9 (7 to 12)         | 0.3 (0.2 to 0.4) | 6.5 (-17.4 to 36)     | 5 (4 to 7)          | 0.2 (0.1 to 0.2) | -3.6 (-24.9 to 20.5)   | 152 (116 to 197)       | 4.4 (3.4 to 5.6)    | -6.9 (-28 to 18.4)     |
| Kazakhstan | Both   | 381 (323 to 447)    | 2 (1.7 to 2.4)   | -14.6 (-28 to 0.2)    | 269 (228 to 314)    | 1.5 (1.3 to 1.7) | -23.8 (-35.7 to -10.8) | 7600 (6400 to 8900)    | 39.8 (33.7 to 46.7) | -25.1 (-37.3 to -12.3) |
|            | Male   | 341 (287 to 400)    | 4.4 (3.7 to 5.2) | -16.5 (-30.3 to -1.5) | 242 (205 to 284)    | 3.3 (2.8 to 3.9) | -24.8 (-36.9 to -12.2) | 6830 (5720 to 8020)    | 84.6 (71.6 to 99.1) | -26.4 (-38.6 to -13.2) |
|            | Female | 40 (33 to 54)       | 0.4 (0.3 to 0.5) | -8 (-23.8 to 14.5)    | 27 (22 to 35)       | 0.3 (0.2 to 0.3) | -19 (-32.8 to 0.5)     | 776 (636 to 1020)      | 7.4 (6 to 9.8)      | -21.4 (-35.2 to -1.7)  |

|            |        |                  |                  |                       |                  |                  |                        |                      |                        |                        |
|------------|--------|------------------|------------------|-----------------------|------------------|------------------|------------------------|----------------------|------------------------|------------------------|
| Kenya      | Both   | 354 (274 to 474) | 1.5 (1.2 to 2)   | -8.3 (-25.1 to 11.1)  | 326 (252 to 445) | 1.4 (1.1 to 1.9) | -10.5 (-25.6 to 5.8)   | 9950 (7690 to 13400) | 38.1 (29.5 to 51.9)    | -12.5 (-27.8 to 4.1)   |
|            | Male   | 306 (231 to 422) | 2.7 (2.1 to 3.7) | -10.1 (-28.7 to 10.7) | 280 (209 to 395) | 2.6 (1.9 to 3.6) | -12 (-28.6 to 6.2)     | 8520 (6350 to 12100) | 67.8 (50.8 to 95.6)    | -13.8 (-30.8 to 6)     |
|            | Female | 48 (37 to 63)    | 0.4 (0.3 to 0.5) | 0 (-20.8 to 29.2)     | 46 (35 to 60)    | 0.4 (0.3 to 0.5) | -4.7 (-23.8 to 17.4)   | 1430 (1070 to 1870)  | 10.3 (7.8 to 13.4)     | -6.7 (-26.7 to 17.1)   |
| Kiribati   | Both   | 1 (0 to 1)       | 0.8 (0.6 to 0.9) | -2.5 (-17 to 14.1)    | 0 (0 to 1)       | 0.7 (0.6 to 0.9) | -2.5 (-16.6 to 13.4)   | 13 (10 to 17)        | 17.7 (13.9 to 22.5)    | -4.1 (-19.3 to 14)     |
|            | Male   | 0 (0 to 0)       | 1.4 (1 to 1.7)   | 1.2 (-17 to 22.4)     | 0 (0 to 0)       | 1.4 (1.1 to 1.8) | 1.2 (-17 to 22.3)      | 9 (7 to 12)          | 29.6 (22.5 to 38.1)    | 0 (-18.5 to 21.7)      |
|            | Female | 0 (0 to 0)       | 0.4 (0.3 to 0.5) | -8.1 (-28 to 17.3)    | 0 (0 to 0)       | 0.4 (0.3 to 0.5) | -8.5 (-27.9 to 16.4)   | 4 (3 to 6)           | 9.8 (7.3 to 12.8)      | -9.8 (-29.2 to 16.5)   |
| Kuwait     | Both   | 30 (24 to 37)    | 1.2 (1 to 1.6)   | 4 (-18.2 to 29.8)     | 15 (12 to 18)    | 0.7 (0.6 to 0.9) | -7.1 (-25.3 to 14.3)   | 369 (290 to 454)     | 14.1 (11.2 to 17.5)    | -11.3 (-29.7 to 11.1)  |
|            | Male   | 26 (20 to 33)    | 1.8 (1.4 to 2.3) | 11.3 (-14.8 to 42.1)  | 13 (10 to 17)    | 1.1 (0.8 to 1.3) | -1.2 (-22.9 to 24.6)   | 317 (242 to 403)     | 20.8 (16.1 to 26.4)    | -4.7 (-27.2 to 22)     |
|            | Female | 4 (3 to 6)       | 0.4 (0.3 to 0.5) | -22.4 (-42 to 5.3)    | 2 (1 to 2)       | 0.2 (0.1 to 0.2) | -33.5 (-49.8 to -10.8) | 52 (38 to 75)        | 4.1 (3.1 to 5.8)       | -33.9 (-50.1 to -10.8) |
| Kyrgyzstan | Both   | 51 (43 to 60)    | 1 (0.9 to 1.2)   | -13 (-27.1 to 4.6)    | 39 (33 to 47)    | 0.8 (0.7 to 1)   | -17.5 (-30.5 to -1.5)  | 1140 (964 to 1370)   | 22.2 (18.8 to 26.4)    | -18.8 (-32.4 to -2.5)  |
|            | Male   | 44 (37 to 53)    | 2.1 (1.7 to 2.5) | -14.9 (-29.7 to 3.2)  | 34 (29 to 41)    | 1.7 (1.4 to 2)   | -19 (-32.2 to -2.2)    | 995 (830 to 1200)    | 43.8 (36.8 to 52.6)    | -20.4 (-34.3 to -3.2)  |
|            | Female | 7 (5 to 8)       | 0.2 (0.2 to 0.3) | 1.9 (-18 to 26.6)     | 5 (4 to 6)       | 0.2 (0.2 to 0.2) | -4.9 (-23.5 to 18.8)   | 149 (119 to 184)     | 5.2 (4.2 to 6.4)       | -5.7 (-25.4 to 17.7)   |
| Laos       | Both   | 57 (41 to 78)    | 1.3 (1 to 1.8)   | -1.7 (-19.2 to 21.8)  | 51 (37 to 69)    | 1.2 (0.9 to 1.6) | -5.5 (-21.2 to 16.5)   | 1370 (960 to 1870)   | 29.2 (20.6 to 39.7)    | -8 (-24.8 to 15.6)     |
|            | Male   | 46 (32 to 66)    | 2.2 (1.6 to 3.1) | -0.5 (-19.6 to 26.2)  | 41 (29 to 58)    | 2.1 (1.5 to 2.8) | -4.5 (-22.4 to 19.7)   | 1090 (743 to 1560)   | 48.5 (33.6 to 68.8)    | -6.7 (-25.3 to 19.6)   |
|            | Female | 11 (8 to 14)     | 0.5 (0.4 to 0.6) | -8.3 (-27.3 to 17)    | 10 (7 to 13)     | 0.5 (0.4 to 0.6) | -10.4 (-29 to 13.3)    | 278 (202 to 366)     | 11.2 (8.2 to 14.5)     | -14.2 (-32.7 to 11.9)  |
| Latvia     | Both   | 107 (83 to 138)  | 3.1 (2.4 to 4.1) | -14.6 (-34.7 to 12.2) | 69 (53 to 86)    | 1.9 (1.5 to 2.5) | -21.7 (-39.8 to 0.4)   | 1780 (1360 to 2290)  | 54.1 (41.1 to 69.7)    | -22.2 (-40.6 to 1.2)   |
|            | Male   | 101 (77 to 131)  | 7.1 (5.5 to 9.4) | -17.7 (-37.7 to 8.5)  | 65 (49 to 82)    | 4.5 (3.5 to 5.8) | -24.2 (-42.3 to -1.8)  | 1690 (1270 to 2190)  | 121.2 (91.3 to 157.7)  | -24.8 (-43.3 to -1.9)  |
|            | Female | 6 (4 to 8)       | 0.3 (0.2 to 0.4) | -11.6 (-35.7 to 21)   | 4 (3 to 5)       | 0.2 (0.1 to 0.2) | -20.1 (-40.8 to 6.2)   | 87 (64 to 116)       | 4.4 (3.2 to 5.9)       | -20.5 (-41.9 to 8.3)   |
| Lebanon    | Both   | 293 (236 to 375) | 5.6 (4.6 to 7.2) | 6.4 (-13.3 to 29.8)   | 150 (123 to 192) | 2.9 (2.4 to 3.7) | -10.5 (-26.2 to 7.4)   | 3690 (2980 to 4710)  | 70.9 (57.2 to 90.7)    | -7.8 (-24.9 to 13.6)   |
|            | Male   | 250 (199 to 329) | 10.7 (8.5 to 14) | 11.1 (-11.7 to 38.2)  | 130 (106 to 169) | 5.6 (4.5 to 7.2) | -5.6 (-23 to 14.7)     | 3160 (2530 to 4090)  | 134.2 (107.8 to 174.7) | -4.1 (-23.3 to 19.1)   |
|            | Female | 43 (32 to 59)    | 1.5 (1.1 to 2.1) | 8 (-17.9 to 41.4)     | 20 (15 to 28)    | 0.7 (0.5 to 1)   | -9.9 (-29 to 15.4)     | 530 (399 to 720)     | 18.7 (14 to 25.4)      | -7.4 (-29.5 to 21.2)   |

|            |        |                  |                  |                       |                  |                  |                        |                     |                        |                        |
|------------|--------|------------------|------------------|-----------------------|------------------|------------------|------------------------|---------------------|------------------------|------------------------|
| Lesotho    | Both   | 39 (29 to 51)    | 2.9 (2.2 to 3.7) | -2.6 (-21.9 to 21.3)  | 36 (28 to 48)    | 2.8 (2.1 to 3.6) | -5.1 (-23.1 to 17.2)   | 1100 (818 to 1460)  | 77.5 (58 to 101.9)     | -5.7 (-25.5 to 19.8)   |
|            | Male   | 33 (25 to 43)    | 5.9 (4.6 to 7.5) | -1.3 (-19.5 to 23.4)  | 31 (23 to 40)    | 5.7 (4.5 to 7.3) | -3.9 (-21.1 to 19.5)   | 934 (699 to 1230)   | 154.6 (117.2 to 201)   | -4.7 (-23.9 to 21.1)   |
|            | Female | 6 (4 to 9)       | 0.8 (0.5 to 1.2) | -4.5 (-34.4 to 30.9)  | 6 (4 to 8)       | 0.8 (0.5 to 1.1) | -6.3 (-34.6 to 28.6)   | 166 (98 to 245)     | 20.9 (12.5 to 30.6)    | -7.3 (-37.4 to 29.2)   |
| Liberia    | Both   | 25 (18 to 34)    | 1.3 (0.9 to 1.7) | -6.6 (-25.5 to 18.7)  | 24 (17 to 32)    | 1.3 (0.9 to 1.7) | -7.2 (-25.3 to 17.1)   | 635 (453 to 879)    | 29.3 (21.3 to 39.4)    | -7.3 (-26.9 to 20.1)   |
|            | Male   | 22 (16 to 31)    | 2.2 (1.6 to 3)   | -6.2 (-25.8 to 20.3)  | 21 (15 to 29)    | 2.2 (1.6 to 3)   | -6.6 (-25.6 to 19)     | 565 (395 to 792)    | 50.7 (36.2 to 69.4)    | -7.1 (-27.8 to 21.5)   |
|            | Female | 3 (2 to 4)       | 0.3 (0.2 to 0.4) | -10.6 (-31.4 to 16.1) | 2 (2 to 3)       | 0.3 (0.2 to 0.3) | -10.8 (-30.9 to 14.5)  | 70 (49 to 96)       | 6.3 (4.5 to 8.6)       | -12 (-32.9 to 16)      |
| Libya      | Both   | 204 (154 to 265) | 3.8 (2.9 to 4.9) | 3.7 (-20.8 to 34.4)   | 141 (108 to 184) | 2.8 (2.1 to 3.6) | 4.2 (-19.7 to 34.6)    | 4050 (3010 to 5310) | 70.2 (52.6 to 91.9)    | 4.8 (-20.7 to 37.2)    |
|            | Male   | 178 (133 to 235) | 6.5 (4.9 to 8.6) | 5 (-21.1 to 38.6)     | 124 (94 to 164)  | 4.8 (3.7 to 6.3) | 5.2 (-20.6 to 36.4)    | 3530 (2610 to 4700) | 120.6 (89.9 to 160.6)  | 6.1 (-20.6 to 41.5)    |
|            | Female | 26 (19 to 35)    | 1 (0.7 to 1.3)   | -0.8 (-25 to 31)      | 17 (13 to 23)    | 0.7 (0.5 to 0.8) | 0.1 (-23 to 31.6)      | 517 (377 to 701)    | 17.7 (13 to 23.7)      | 0.1 (-24.3 to 31.7)    |
| Lithuania  | Both   | 166 (132 to 207) | 3.3 (2.6 to 4.2) | -19.5 (-37 to 1.6)    | 115 (92 to 142)  | 2.2 (1.8 to 2.8) | -23 (-39 to -3.9)      | 3030 (2410 to 3790) | 63.3 (50.2 to 80)      | -24.6 (-41 to -5)      |
|            | Male   | 156 (123 to 195) | 7.5 (5.9 to 9.3) | -21.2 (-38.2 to -0.7) | 109 (86 to 135)  | 5.2 (4.1 to 6.5) | -24.3 (-39.9 to -5.8)  | 2870 (2270 to 3610) | 140.5 (110.8 to 177.4) | -26.1 (-42.1 to -7)    |
|            | Female | 10 (8 to 13)     | 0.4 (0.3 to 0.5) | -3.7 (-26 to 24.1)    | 7 (5 to 8)       | 0.2 (0.2 to 0.3) | -10.4 (-30.4 to 13.8)  | 158 (121 to 200)    | 5.7 (4.3 to 7.3)       | -10.4 (-31.3 to 15.1)  |
| Luxembourg | Both   | 26 (21 to 32)    | 2.7 (2.2 to 3.4) | -19.4 (-36.3 to 1.1)  | 9 (8 to 11)      | 1 (0.8 to 1.1)   | -20.8 (-31.2 to -7.8)  | 236 (204 to 275)    | 25.2 (21.8 to 29.4)    | -21.9 (-32.9 to -8.9)  |
|            | Male   | 23 (18 to 29)    | 4.9 (3.9 to 6.2) | -21.7 (-38.3 to -1.5) | 8 (7 to 9)       | 1.7 (1.5 to 2)   | -24.4 (-34.8 to -11.6) | 201 (173 to 237)    | 43.6 (37.4 to 51.3)    | -24.5 (-35.7 to -10.7) |
|            | Female | 3 (2 to 4)       | 0.6 (0.5 to 0.8) | -18.4 (-36.8 to 7.3)  | 2 (1 to 2)       | 0.3 (0.2 to 0.3) | -16.9 (-29.8 to 2.2)   | 35 (28 to 43)       | 7.3 (6 to 9.1)         | -17 (-30 to 1.8)       |
| Madagascar | Both   | 124 (90 to 167)  | 1 (0.8 to 1.4)   | -6.6 (-27.7 to 17.6)  | 115 (84 to 154)  | 1 (0.7 to 1.3)   | -7.3 (-27.7 to 16.2)   | 3630 (2600 to 4900) | 26.9 (19.7 to 36)      | -7.9 (-29.2 to 17.9)   |
|            | Male   | 91 (64 to 126)   | 1.6 (1.1 to 2.1) | -7.2 (-28.9 to 18.2)  | 85 (60 to 117)   | 1.5 (1.1 to 2.1) | -7.8 (-29.3 to 16.5)   | 2630 (1830 to 3660) | 40.6 (29 to 55.8)      | -8.3 (-31 to 19.1)     |
|            | Female | 33 (24 to 45)    | 0.5 (0.4 to 0.7) | -5.3 (-28.7 to 23.8)  | 30 (22 to 41)    | 0.5 (0.4 to 0.7) | -6.1 (-28.9 to 21.4)   | 996 (721 to 1380)   | 13.7 (10.1 to 18.9)    | -7.2 (-31.2 to 22.2)   |
| Malawi     | Both   | 42 (33 to 54)    | 0.6 (0.4 to 0.7) | -8.1 (-25.6 to 12.9)  | 39 (31 to 50)    | 0.5 (0.4 to 0.7) | -8.8 (-25.5 to 11.4)   | 1160 (883 to 1520)  | 14.1 (11 to 18.3)      | -9.9 (-28.9 to 13.3)   |
|            | Male   | 32 (25 to 42)    | 1 (0.8 to 1.2)   | -8.7 (-26.8 to 13.9)  | 30 (23 to 39)    | 0.9 (0.8 to 1.2) | -9.3 (-26.5 to 12.6)   | 878 (664 to 1180)   | 23.7 (18.4 to 31.1)    | -10.6 (-29.6 to 13.6)  |
|            | Female | 10 (8 to 14)     | 0.2 (0.2 to 0.3) | -5.7 (-28.9 to 21.6)  | 10 (7 to 13)     | 0.2 (0.2 to 0.3) | -6.6 (-29 to 20.7)     | 282 (201 to 391)    | 6.2 (4.5 to 8.5)       | -7.6 (-31.1 to 22.5)   |

|                  |        |                  |                  |                      |                  |                  |                       |                      |                     |                       |
|------------------|--------|------------------|------------------|----------------------|------------------|------------------|-----------------------|----------------------|---------------------|-----------------------|
| Malaysia         | Both   | 534 (406 to 681) | 2 (1.5 to 2.5)   | 28.1 (-1.7 to 64.8)  | 331 (254 to 422) | 1.3 (1 to 1.6)   | 13.7 (-11.5 to 45.1)  | 8320 (6300 to 10700) | 29.9 (22.8 to 38.1) | 15.9 (-10.7 to 48)    |
|                  | Male   | 462 (346 to 596) | 3.4 (2.6 to 4.4) | 29 (-2.7 to 68.3)    | 283 (212 to 365) | 2.2 (1.7 to 2.8) | 13.9 (-12.3 to 48.1)  | 7090 (5340 to 9260)  | 50.9 (38.5 to 66.3) | 16.7 (-11.5 to 51.3)  |
|                  | Female | 72 (54 to 93)    | 0.5 (0.4 to 0.7) | 17.8 (-10.4 to 55.8) | 48 (37 to 63)    | 0.4 (0.3 to 0.5) | 4.8 (-19.6 to 36.5)   | 1240 (924 to 1630)   | 8.8 (6.7 to 11.5)   | 9.2 (-17.1 to 43.7)   |
| Maldives         | Both   | 4 (3 to 5)       | 1.4 (1.1 to 1.7) | 5.4 (-16.1 to 31.9)  | 2 (2 to 3)       | 0.8 (0.7 to 1)   | -9.3 (-27.7 to 13.4)  | 55 (45 to 69)        | 17.3 (14 to 21.5)   | -6.9 (-25.6 to 16.8)  |
|                  | Male   | 4 (3 to 5)       | 2.4 (1.9 to 3)   | 7.1 (-15.8 to 34.5)  | 2 (2 to 3)       | 1.5 (1.2 to 1.8) | -6.2 (-25.4 to 17.4)  | 52 (42 to 65)        | 30 (24.1 to 37.4)   | -6.9 (-26.3 to 18.3)  |
|                  | Female | 0 (0 to 0)       | 0.2 (0.1 to 0.2) | -1.9 (-23.8 to 25.2) | 0 (0 to 0)       | 0.1 (0.1 to 0.1) | -12.5 (-31.8 to 11.4) | 3 (3 to 4)           | 2.3 (1.8 to 2.9)    | -13.2 (-32.6 to 10.5) |
| Mali             | Both   | 92 (70 to 123)   | 1 (0.8 to 1.3)   | -0.1 (-18.2 to 22.4) | 86 (65 to 113)   | 1 (0.8 to 1.3)   | -1.6 (-18.8 to 19.8)  | 2480 (1860 to 3330)  | 25.8 (19.6 to 34.6) | -1.2 (-21.1 to 23)    |
|                  | Male   | 71 (52 to 97)    | 1.6 (1.2 to 2.1) | 0.3 (-19.6 to 26.6)  | 67 (49 to 90)    | 1.5 (1.1 to 2)   | -1.3 (-20.3 to 23.4)  | 1890 (1350 to 2610)  | 38.7 (28.2 to 52.8) | -0.6 (-22.3 to 28.1)  |
|                  | Female | 21 (16 to 28)    | 0.5 (0.4 to 0.6) | -2.7 (-23.1 to 23.9) | 19 (14 to 25)    | 0.4 (0.3 to 0.6) | -4.1 (-23.6 to 20)    | 587 (429 to 805)     | 12 (8.9 to 16.2)    | -4.5 (-25.9 to 22.2)  |
| Malta            | Both   | 22 (18 to 27)    | 2.6 (2.2 to 3.2) | -2.6 (-20.3 to 19.1) | 9 (8 to 10)      | 1 (0.9 to 1.1)   | -13.7 (-25.2 to -0.4) | 207 (178 to 240)     | 26.2 (22.3 to 30.3) | -11.1 (-23.5 to 3.5)  |
|                  | Male   | 20 (16 to 24)    | 5 (4 to 6.1)     | -5.3 (-22.7 to 16.4) | 8 (7 to 9)       | 1.9 (1.6 to 2.2) | -16.6 (-27.9 to -2.7) | 183 (156 to 214)     | 47.7 (40.3 to 55.8) | -13.2 (-26.2 to 1.7)  |
|                  | Female | 2 (2 to 3)       | 0.5 (0.4 to 0.6) | -3 (-22.8 to 22.7)   | 1 (1 to 1)       | 0.2 (0.2 to 0.3) | -12.9 (-27.2 to 3.1)  | 23 (19 to 29)        | 5.9 (4.9 to 7.2)    | -11.7 (-27.3 to 5.2)  |
| Marshall Islands | Both   | 0 (0 to 1)       | 1.3 (0.9 to 1.7) | -3.7 (-19.4 to 17.8) | 0 (0 to 0)       | 1.2 (0.9 to 1.6) | -5.3 (-20.5 to 14.5)  | 10 (7 to 14)         | 27.8 (19.6 to 36.9) | -7.1 (-23.5 to 14.4)  |
|                  | Male   | 0 (0 to 0)       | 1.9 (1.3 to 2.6) | -3 (-20.4 to 19.8)   | 0 (0 to 0)       | 1.9 (1.3 to 2.5) | -5.1 (-22.1 to 17.2)  | 8 (5 to 11)          | 41 (27.3 to 55.9)   | -5.8 (-23.9 to 17.8)  |
|                  | Female | 0 (0 to 0)       | 0.5 (0.4 to 0.7) | -8.7 (-29.5 to 15.4) | 0 (0 to 0)       | 0.5 (0.4 to 0.7) | -10.5 (-29.7 to 12.7) | 3 (2 to 4)           | 13.4 (9.5 to 18.4)  | -11.4 (-32.1 to 12.4) |
| Mauritania       | Both   | 20 (14 to 27)    | 1 (0.7 to 1.3)   | -0.7 (-23.3 to 23.1) | 18 (13 to 25)    | 0.9 (0.7 to 1.2) | -3.4 (-24.7 to 18.3)  | 446 (304 to 624)     | 20.9 (14.6 to 28.5) | -6.7 (-29.7 to 17.5)  |
|                  | Male   | 17 (12 to 24)    | 1.7 (1.2 to 2.3) | 0.4 (-23.1 to 25.6)  | 16 (11 to 22)    | 1.6 (1.2 to 2.2) | -2.7 (-24.2 to 21.1)  | 386 (257 to 551)     | 36.2 (24.7 to 50.9) | -5.2 (-29.2 to 20.8)  |
|                  | Female | 3 (2 to 3)       | 0.2 (0.2 to 0.3) | -7.4 (-31.8 to 18.4) | 2 (2 to 3)       | 0.2 (0.2 to 0.3) | -10.4 (-33.1 to 13.9) | 60 (42 to 82)        | 5.4 (3.9 to 7.4)    | -13.3 (-37.6 to 11.7) |
| Mauritius        | Both   | 32 (25 to 40)    | 1.8 (1.4 to 2.2) | -0.3 (-21.3 to 23.5) | 19 (15 to 24)    | 1.1 (0.9 to 1.4) | -8.2 (-26.6 to 12.8)  | 494 (388 to 617)     | 27.2 (21.4 to 33.9) | -8.7 (-27.7 to 13.2)  |
|                  | Male   | 30 (23 to 37)    | 3.6 (2.8 to 4.4) | 1.6 (-20.2 to 26.6)  | 18 (14 to 22)    | 2.3 (1.8 to 2.8) | -6.2 (-24.7 to 15.8)  | 448 (351 to 558)     | 52.9 (41.5 to 65.8) | -6.4 (-26.1 to 16.5)  |
|                  | Female | 3 (2 to 5)       | 0.3 (0.2 to 0.6) | -27.9 (-43.7 to 0.7) | 2 (1 to 4)       | 0.2 (0.2 to 0.4) | -32.5 (-46.8 to -6.3) | 46 (35 to 89)        | 4.9 (3.8 to 9.6)    | -32.9 (-47.7 to -7.4) |



|                                 |        |                        |                     |                       |                    |                   |                       |                           |                        |                       |
|---------------------------------|--------|------------------------|---------------------|-----------------------|--------------------|-------------------|-----------------------|---------------------------|------------------------|-----------------------|
| Mexico                          | Both   | 1490<br>(1240 to 1790) | 1.3 (1.1 to 1.5)    | -5.3 (-20.5 to 12.2)  | 1120 (926 to 1330) | 1 (0.8 to 1.2)    | -10.8 (-24.4 to 4.9)  | 25500<br>(21300 to 30700) | 21.6 (18 to 25.9)      | -9.7 (-24.8 to 6.9)   |
|                                 | Male   | 1280<br>(1030 to 1560) | 2.4 (1.9 to 2.9)    | -3.9 (-21.1 to 16.6)  | 957 (775 to 1160)  | 1.8 (1.5 to 2.2)  | -9.4 (-25.5 to 9.6)   | 21800<br>(17600 to 26700) | 39.7 (32.2 to 48.3)    | -8.5 (-25.5 to 11.6)  |
|                                 | Female | 216 (174 to 297)       | 0.3 (0.3 to 0.5)    | -7.3 (-23.1 to 10)    | 162 (131 to 223)   | 0.3 (0.2 to 0.4)  | -12 (-26.6 to 5.2)    | 3710 (3000 to 5410)       | 5.9 (4.8 to 8.4)       | -11.6 (-26.8 to 6.7)  |
| Federatead States of Micronesia | Both   | 1 (1 to 1)             | 1.2 (0.9 to 1.6)    | 2.6 (-18.3 to 28)     | 1 (0 to 1)         | 1.1 (0.8 to 1.4)  | -1.5 (-21 to 22.2)    | 20 (13 to 28)             | 26.5 (18.1 to 35.1)    | -2.1 (-24.9 to 23.3)  |
|                                 | Male   | 1 (0 to 1)             | 2.1 (1.5 to 2.8)    | 2.4 (-20.3 to 29.9)   | 1 (0 to 1)         | 1.9 (1.4 to 2.5)  | -1.3 (-22.2 to 23.9)  | 15 (9 to 21)              | 43 (28.5 to 58.1)      | -2.6 (-28.4 to 25.1)  |
|                                 | Female | 0 (0 to 0)             | 0.5 (0.4 to 0.8)    | 2.8 (-21.6 to 33.4)   | 0 (0 to 0)         | 0.5 (0.3 to 0.6)  | -0.8 (-23.6 to 27)    | 5 (4 to 8)                | 12.7 (9 to 17.8)       | -1.5 (-25.7 to 29.4)  |
| Monaco                          | Both   | 8 (6 to 10)            | 10 (7.8 to 12.4)    | -6.6 (-26.7 to 18.1)  | 3 (2 to 3)         | 3.2 (2.6 to 4)    | -10.3 (-28 to 11.2)   | 67 (52 to 82)             | 87.8 (68.4 to 109.6)   | -10.5 (-29.6 to 13.1) |
|                                 | Male   | 7 (6 to 9)             | 19.1 (15 to 23.8)   | -6.8 (-26.9 to 18.6)  | 3 (2 to 3)         | 6.2 (4.9 to 7.6)  | -10.7 (-28.6 to 11.7) | 61 (48 to 74)             | 164.4 (127.8 to 205.2) | -10.5 (-30.2 to 13.5) |
|                                 | Female | 1 (0 to 1)             | 1.4 (1 to 1.9)      | -10.2 (-33.7 to 20.7) | 0 (0 to 0)         | 0.6 (0.4 to 0.8)  | -13 (-34.9 to 14.6)   | 6 (4 to 8)                | 15.6 (11.3 to 20.6)    | -12.8 (-35 to 17.1)   |
| Mongolia                        | Both   | 34 (26 to 45)          | 1.7 (1.3 to 2.2)    | -3.4 (-23.9 to 21.3)  | 31 (24 to 41)      | 1.7 (1.2 to 2.2)  | -4.6 (-24.2 to 19.7)  | 749 (572 to 983)          | 34.4 (26.2 to 44.5)    | -8.3 (-27.9 to 17.4)  |
|                                 | Male   | 30 (23 to 39)          | 3.9 (2.7 to 5)      | -0.6 (-21.4 to 24.6)  | 27 (21 to 35)      | 4 (2.9 to 5.1)    | -2.3 (-22.8 to 21.7)  | 648 (485 to 854)          | 73 (54.6 to 94.7)      | -4.6 (-25.4 to 22.1)  |
|                                 | Female | 5 (3 to 6)             | 0.4 (0.3 to 0.6)    | -19.7 (-41.1 to 8.9)  | 4 (3 to 6)         | 0.4 (0.3 to 0.5)  | -22.1 (-42.6 to 6.3)  | 100 (74 to 135)           | 8.3 (6.1 to 11.4)      | -22.7 (-43.1 to 5.6)  |
| Montenegro                      | Both   | 82 (67 to 101)         | 8.5 (6.9 to 10.4)   | -0.8 (-18.7 to 21.5)  | 46 (38 to 57)      | 4.7 (3.9 to 5.8)  | -7.5 (-23.7 to 13.7)  | 1240 (1010 to 1540)       | 130 (104.8 to 161.1)   | -9.4 (-26.1 to 11.9)  |
|                                 | Male   | 64 (52 to 81)          | 14.1 (11.3 to 17.7) | 0.7 (-19.2 to 26.3)   | 37 (30 to 46)      | 8.2 (6.6 to 10.2) | -5.2 (-23.5 to 18.6)  | 995 (792 to 1260)         | 218.5 (173.3 to 275.1) | -8.1 (-26.1 to 15.6)  |
|                                 | Female | 18 (14 to 22)          | 3.6 (2.9 to 4.4)    | -6.6 (-25.1 to 15.9)  | 10 (8 to 11)       | 1.8 (1.5 to 2.2)  | -14.9 (-29.9 to 2.2)  | 248 (200 to 301)          | 51 (41.2 to 62.3)      | -14.6 (-31.6 to 5.4)  |
| Morocco                         | Both   | 1230 (874 to 1570)     | 3.7 (2.7 to 4.7)    | 15.8 (-9.7 to 53)     | 948 (686 to 1190)  | 3 (2.2 to 3.7)    | 8.5 (-14.6 to 41.9)   | 26100<br>(18400 to 33800) | 76.2 (54.6 to 96.8)    | 4.7 (-18.4 to 37)     |
|                                 | Male   | 1130 (798 to 1450)     | 6.9 (5 to 8.8)      | 16.8 (-9.7 to 56.5)   | 876 (628 to 1100)  | 5.6 (4.1 to 7)    | 10.2 (-13.8 to 47)    | 24000<br>(16700 to 31100) | 140.9 (99.8 to 180.4)  | 5.4 (-18.9 to 40.5)   |
|                                 | Female | 97 (73 to 128)         | 0.6 (0.4 to 0.7)    | 0.5 (-23.7 to 33.6)   | 72 (55 to 93)      | 0.4 (0.3 to 0.6)  | -8.8 (-29.6 to 19.7)  | 2140 (1560 to 2880)       | 12.2 (9 to 16)         | -9.3 (-31 to 21)      |
| Mozambique                      | Both   | 210 (159 to 272)       | 1.8 (1.4 to 2.3)    | -2.7 (-23.4 to 20.8)  | 196 (150 to 253)   | 1.7 (1.3 to 2.2)  | -4.3 (-23.9 to 18)    | 6020 (4460 to 7850)       | 47 (35.7 to 60.9)      | -4.5 (-27 to 19.8)    |

|             |        |                  |                  |                      |                  |                  |                       |                        |                        |                       |
|-------------|--------|------------------|------------------|----------------------|------------------|------------------|-----------------------|------------------------|------------------------|-----------------------|
|             | Male   | 173 (132 to 225) | 3.3 (2.5 to 4.2) | -2.5 (-23.2 to 20.6) | 162 (124 to 210) | 3.2 (2.5 to 4.1) | -3.9 (-23.7 to 18.1)  | 4960 (3730 to 6480)    | 85.9 (65.7 to 112)     | -4.4 (-27 to 20.1)    |
|             | Female | 37 (25 to 53)    | 0.6 (0.4 to 0.8) | 0.7 (-27 to 36.8)    | 34 (23 to 49)    | 0.5 (0.4 to 0.8) | -0.7 (-27.5 to 35.5)  | 1060 (679 to 1510)     | 14.8 (9.8 to 21.1)     | -1.2 (-29.9 to 38.1)  |
| Myanmar     | Both   | 557 (446 to 732) | 1.2 (1 to 1.6)   | -5.1 (-21.9 to 15.2) | 477 (386 to 631) | 1.1 (0.9 to 1.4) | -10.8 (-26.2 to 7.4)  | 12400 (9750 to 16300)  | 25.4 (20.1 to 33.5)    | -13 (-29.3 to 6.1)    |
|             | Male   | 434 (337 to 588) | 2.2 (1.7 to 2.9) | 0.1 (-19.4 to 23.7)  | 366 (288 to 488) | 1.9 (1.5 to 2.5) | -6.4 (-23.5 to 15)    | 9600 (7440 to 13000)   | 44.7 (35.2 to 59.9)    | -8.4 (-26.5 to 14.1)  |
|             | Female | 123 (94 to 161)  | 0.5 (0.4 to 0.6) | -14.8 (-31.5 to 5.2) | 111 (86 to 144)  | 0.4 (0.3 to 0.6) | -18 (-34.2 to 1.8)    | 2810 (2140 to 3720)    | 10.4 (7.9 to 13.7)     | -21.8 (-38.5 to -0.5) |
| Namibia     | Both   | 46 (35 to 61)    | 3.1 (2.4 to 4.1) | 3.1 (-17.3 to 27.4)  | 39 (30 to 51)    | 2.8 (2.2 to 3.5) | -2.9 (-20.8 to 18.5)  | 1150 (857 to 1540)     | 74.4 (56.6 to 98.2)    | -3.6 (-24.3 to 21.8)  |
|             | Male   | 38 (29 to 50)    | 6.1 (4.8 to 7.8) | 5.7 (-13.8 to 29.6)  | 33 (25 to 42)    | 5.4 (4.2 to 6.8) | -0.2 (-18 to 22)      | 953 (718 to 1270)      | 141.6 (108.8 to 184.3) | -1.5 (-21.3 to 23.6)  |
|             | Female | 8 (5 to 12)      | 1 (0.7 to 1.4)   | -1.7 (-29.6 to 35.1) | 7 (5 to 10)      | 0.9 (0.6 to 1.2) | -7.5 (-33.2 to 26.1)  | 194 (128 to 288)       | 22.5 (14.9 to 33.4)    | -8.9 (-36.5 to 28.2)  |
| Nauru       | Both   | 0 (0 to 0)       | 1.6 (1.2 to 2)   | -13.4 (-28.6 to 7.5) | 0 (0 to 0)       | 1.3 (1 to 1.7)   | -20.3 (-33.9 to -0.7) | 1 (1 to 2)             | 30.5 (23.4 to 38.9)    | -22.1 (-36.1 to -3.1) |
|             | Male   | 0 (0 to 0)       | 2.7 (2 to 3.6)   | -5.7 (-24 to 19)     | 0 (0 to 0)       | 2.3 (1.7 to 2.9) | -14.3 (-30.5 to 7.4)  | 1 (1 to 2)             | 50.9 (36.3 to 67)      | -16 (-32.7 to 6.8)    |
|             | Female | 0 (0 to 0)       | 0.6 (0.4 to 0.8) | -8.7 (-29.7 to 21.8) | 0 (0 to 0)       | 0.5 (0.3 to 0.7) | -16.7 (-35.5 to 11.1) | 0 (0 to 1)             | 13 (9.2 to 18)         | -18.2 (-37.1 to 10.7) |
| Nepal       | Both   | 619 (467 to 835) | 2.7 (2.1 to 3.6) | 15.3 (-7.7 to 41)    | 554 (421 to 737) | 2.5 (1.9 to 3.3) | 11.5 (-10.5 to 35.5)  | 14800 (11100 to 20300) | 62.7 (47.1 to 84.6)    | 9.2 (-13.4 to 34.6)   |
|             | Male   | 489 (357 to 679) | 4.5 (3.3 to 6.1) | 20.7 (-5.4 to 51.4)  | 442 (324 to 606) | 4.2 (3.1 to 5.7) | 16.7 (-8 to 44.7)     | 11600 (8400 to 16300)  | 103.9 (75.3 to 145.3)  | 14.7 (-11.4 to 44.8)  |
|             | Female | 129 (94 to 171)  | 1.1 (0.8 to 1.4) | 8.6 (-14.5 to 38.1)  | 112 (82 to 148)  | 1 (0.7 to 1.2)   | 4.6 (-17.8 to 32.5)   | 3200 (2330 to 4260)    | 25.1 (18.4 to 33.3)    | 2.6 (-20.2 to 32.6)   |
| Netherlands | Both   | 733 (557 to 940) | 2.3 (1.7 to 2.9) | -6 (-29.9 to 21.5)   | 267 (242 to 292) | 0.8 (0.7 to 0.9) | -10.1 (-18.1 to -1.1) | 5950 (5360 to 6560)    | 18.9 (17.1 to 20.9)    | -11.9 (-20.7 to -2.3) |
|             | Male   | 622 (468 to 806) | 4 (3 to 5.2)     | -8.3 (-31.9 to 20.2) | 216 (195 to 240) | 1.4 (1.3 to 1.5) | -13.6 (-22.3 to -3.5) | 4820 (4310 to 5360)    | 31.7 (28.3 to 35.3)    | -13.9 (-23.2 to -2.7) |
|             | Female | 111 (72 to 146)  | 0.7 (0.4 to 0.9) | -3.9 (-29.5 to 25.9) | 51 (33 to 60)    | 0.3 (0.2 to 0.3) | -7.8 (-19.7 to 5.7)   | 1130 (734 to 1330)     | 7.2 (4.7 to 8.4)       | -9.9 (-21.8 to 3.6)   |
| New Zealand | Both   | 109 (85 to 139)  | 1.4 (1.1 to 1.8) | -4.9 (-28.3 to 23.8) | 37 (33 to 40)    | 0.5 (0.4 to 0.5) | -10.4 (-18 to -2)     | 830 (755 to 908)       | 11.3 (10.4 to 12.3)    | -11.3 (-18.8 to -3.1) |
|             | Male   | 100 (75 to 130)  | 2.8 (2.1 to 3.6) | -5 (-29.9 to 26.6)   | 29 (26 to 32)    | 0.8 (0.7 to 0.9) | -11.3 (-20.4 to -1.2) | 650 (586 to 721)       | 18.6 (16.8 to 20.6)    | -11.1 (-20.6 to -1)   |
|             | Female | 9 (7 to 12)      | 0.2 (0.2 to 0.3) | -8.4 (-30.1 to 19.1) | 8 (7 to 10)      | 0.2 (0.2 to 0.2) | -10.9 (-21.3 to 1.6)  | 180 (155 to 213)       | 4.8 (4.2 to 5.6)       | -11.7 (-22.3 to 0.8)  |

|                          |        |                    |                  |                        |                   |                  |                        |                        |                        |                        |
|--------------------------|--------|--------------------|------------------|------------------------|-------------------|------------------|------------------------|------------------------|------------------------|------------------------|
| Nicaragua                | Both   | 67 (53 to 85)      | 1.6 (1.2 to 2)   | 0.8 (-20.9 to 28.1)    | 52 (41 to 65)     | 1.3 (1 to 1.6)   | -8.4 (-28 to 14.9)     | 1180 (912 to 1490)     | 26.6 (20.7 to 33.7)    | -6.4 (-26.7 to 19)     |
|                          | Male   | 59 (45 to 76)      | 3.2 (2.5 to 4)   | 5.9 (-18.1 to 36.5)    | 45 (35 to 58)     | 2.6 (2 to 3.2)   | -3.3 (-24.4 to 22.5)   | 1040 (793 to 1330)     | 52.6 (40.5 to 67.3)    | -1.8 (-24.7 to 26.4)   |
|                          | Female | 8 (7 to 10)        | 0.3 (0.3 to 0.4) | -10.4 (-27.8 to 11.9)  | 6 (5 to 7)        | 0.3 (0.2 to 0.3) | -19.1 (-34 to -0.7)    | 142 (113 to 177)       | 5.7 (4.6 to 7)         | -16.8 (-33.2 to 5)     |
| Niger                    | Both   | 80 (58 to 106)     | 1.1 (0.8 to 1.4) | 2.7 (-16.6 to 29.4)    | 77 (56 to 102)    | 1.1 (0.8 to 1.4) | 1.3 (-17.3 to 26.9)    | 2070 (1480 to 2760)    | 25 (18 to 32.8)        | 2.6 (-17.4 to 30.6)    |
|                          | Male   | 70 (49 to 94)      | 1.9 (1.4 to 2.5) | 4.9 (-16 to 33.9)      | 68 (47 to 90)     | 2 (1.4 to 2.6)   | 3.5 (-16.6 to 32.3)    | 1800 (1260 to 2450)    | 44.8 (31.6 to 59.5)    | 4.6 (-17 to 33.6)      |
|                          | Female | 10 (7 to 14)       | 0.3 (0.2 to 0.3) | 0.7 (-21.9 to 29.4)    | 10 (7 to 13)      | 0.3 (0.2 to 0.3) | -0.2 (-21.7 to 27.1)   | 267 (187 to 359)       | 6.1 (4.3 to 8.1)       | -0.5 (-23.5 to 28.5)   |
| Nigeria                  | Both   | 1070 (778 to 1490) | 1.2 (0.9 to 1.7) | -15.8 (-41.5 to 23.7)  | 992 (713 to 1380) | 1.2 (0.9 to 1.6) | -15.9 (-41.8 to 25.4)  | 27900 (19600 to 40200) | 28.6 (20.5 to 40)      | -17.8 (-44.2 to 24.2)  |
|                          | Male   | 1020 (724 to 1440) | 2.4 (1.8 to 3.4) | -7.3 (-36.7 to 38.8)   | 946 (669 to 1330) | 2.4 (1.7 to 3.3) | -8.3 (-37.5 to 39.6)   | 26600 (18400 to 38600) | 58.4 (41.1 to 83.1)    | -8.8 (-39.7 to 41.9)   |
|                          | Female | 50 (35 to 67)      | 0.1 (0.1 to 0.1) | -4.3 (-33.7 to 36.4)   | 46 (33 to 63)     | 0.1 (0.1 to 0.1) | -5.2 (-31.5 to 34.9)   | 1280 (892 to 1800)     | 2.5 (1.8 to 3.4)       | -5.2 (-32.9 to 41.5)   |
| Niue                     | Both   | 0 (0 to 0)         | 1.1 (0.9 to 1.4) | -3.9 (-17.8 to 11.2)   | 0 (0 to 0)        | 0.8 (0.6 to 0.9) | -8.2 (-21.2 to 6)      | 0 (0 to 0)             | 17.5 (13.9 to 21.7)    | -8.1 (-22 to 7.2)      |
|                          | Male   | 0 (0 to 0)         | 2.1 (1.7 to 2.6) | -2.2 (-17.5 to 15.8)   | 0 (0 to 0)        | 1.5 (1.2 to 1.8) | -6 (-21.3 to 11.8)     | 0 (0 to 0)             | 30.5 (24.1 to 38.1)    | -6.6 (-21.3 to 10.6)   |
|                          | Female | 0 (0 to 0)         | 0.4 (0.3 to 0.5) | -6.6 (-29.3 to 22.5)   | 0 (0 to 0)        | 0.3 (0.2 to 0.4) | -10.4 (-30.9 to 15.2)  | 0 (0 to 0)             | 7.1 (5.1 to 9.6)       | -10.4 (-32.1 to 18.1)  |
| North Macedonia          | Both   | 183 (139 to 237)   | 5.6 (4.3 to 7.2) | -8.2 (-29.4 to 17.1)   | 118 (91 to 151)   | 3.6 (2.8 to 4.6) | -12.5 (-31.5 to 10.1)  | 3150 (2390 to 4060)    | 96 (73.2 to 123.3)     | -13.4 (-33.5 to 10.5)  |
|                          | Male   | 167 (126 to 216)   | 10.4 (8 to 13.4) | -9.8 (-31 to 15.8)     | 109 (83 to 139)   | 7 (5.4 to 8.9)   | -14 (-32.4 to 8.1)     | 2880 (2180 to 3740)    | 179.3 (135.8 to 230.7) | -14.7 (-34.6 to 9.7)   |
|                          | Female | 16 (13 to 21)      | 1 (0.8 to 1.3)   | -5.5 (-28.2 to 23)     | 10 (8 to 12)      | 0.6 (0.5 to 0.8) | -11 (-31 to 13.8)      | 263 (201 to 340)       | 16.3 (12.5 to 21)      | -11.4 (-32.3 to 14.8)  |
| Northern Mariana Islands | Both   | 1 (0 to 1)         | 1 (0.8 to 1.3)   | -37.7 (-48.5 to -18.7) | 0 (0 to 0)        | 0.6 (0.6 to 0.8) | -37.7 (-47.8 to -22.9) | 8 (7 to 10)            | 14.4 (12 to 18.5)      | -38.9 (-49.1 to -21.3) |
|                          | Male   | 0 (0 to 0)         | 1.6 (1.3 to 2)   | -36.8 (-49.2 to -17.4) | 0 (0 to 0)        | 1 (0.9 to 1.3)   | -36.3 (-47.8 to -19.7) | 6 (4 to 7)             | 21.6 (17.8 to 28.1)    | -38.5 (-50.1 to -20.5) |
|                          | Female | 0 (0 to 0)         | 0.5 (0.4 to 0.6) | -27.2 (-43.9 to -4.2)  | 0 (0 to 0)        | 0.3 (0.2 to 0.4) | -26.7 (-42.6 to -5)    | 3 (2 to 3)             | 7.8 (6 to 10)          | -28.9 (-45.1 to -6.5)  |
| Norway                   | Both   | 138 (111 to 168)   | 1.5 (1.2 to 1.9) | -12.8 (-29 to 7.7)     | 40 (37 to 43)     | 0.4 (0.4 to 0.4) | -14.6 (-18.6 to -7.4)  | 886 (826 to 965)       | 10 (9.3 to 10.9)       | -17.4 (-21.6 to -9.8)  |
|                          | Male   | 121 (95 to 151)    | 2.8 (2.2 to 3.4) | -14.9 (-32.6 to 7.1)   | 31 (29 to 34)     | 0.7 (0.7 to 0.8) | -18 (-22.4 to -10.5)   | 709 (658 to 781)       | 16.4 (15.2 to 18)      | -20 (-25 to -11.7)     |

|                  |        |                     |                  |                       |                     |                   |                        |                           |                        |                        |
|------------------|--------|---------------------|------------------|-----------------------|---------------------|-------------------|------------------------|---------------------------|------------------------|------------------------|
|                  | Female | 17 (13 to 22)       | 0.4 (0.3 to 0.5) | -8.7 (-27.7 to 15)    | 8 (7 to 9)          | 0.2 (0.1 to 0.2)  | -9.1 (-15.9 to 0.1)    | 177 (150 to 197)          | 4 (3.5 to 4.5)         | -11.5 (-18.1 to -2.1)  |
| Oman             | Both   | 19 (15 to 24)       | 1.1 (0.9 to 1.4) | -24.3 (-38 to -8.3)   | 10 (8 to 12)        | 0.7 (0.6 to 0.8)  | -28.4 (-40.9 to -14.7) | 298 (237 to 374)          | 15.1 (12.4 to 18.3)    | -35.6 (-47.5 to -22.1) |
|                  | Male   | 17 (13 to 22)       | 1.8 (1.5 to 2.2) | -22.5 (-37.9 to -4.2) | 9 (7 to 11)         | 1.2 (1 to 1.4)    | -25.4 (-39.5 to -9.4)  | 261 (202 to 336)          | 23.9 (19.3 to 29.3)    | -34.6 (-47.7 to -19.2) |
|                  | Female | 3 (2 to 3)          | 0.3 (0.3 to 0.4) | -20.2 (-36.7 to 0.9)  | 1 (1 to 2)          | 0.2 (0.1 to 0.2)  | -27 (-41.7 to -8.9)    | 37 (30 to 45)             | 4.4 (3.6 to 5.4)       | -31.4 (-45.6 to -13.7) |
| Pakistan         | Both   | 7380 (5640 to 9720) | 6.2 (4.8 to 8.1) | -7.5 (-31.6 to 25.7)  | 6570 (5040 to 8600) | 5.7 (4.5 to 7.4)  | -10.3 (-32.1 to 21)    | 200000 (153000 to 265000) | 155.1 (119.6 to 203.7) | -10.5 (-33.5 to 22.7)  |
|                  | Male   | 6320 (4520 to 8580) | 10.3 (7.4 to 14) | -6.9 (-35.6 to 31.8)  | 5640 (4120 to 7670) | 9.6 (7.1 to 12.9) | -9.6 (-34.7 to 26.3)   | 170000 (124000 to 234000) | 257.2 (188 to 350.3)   | -9.9 (-35.5 to 29.1)   |
|                  | Female | 1060 (816 to 1400)  | 1.8 (1.4 to 2.3) | -5.4 (-29.3 to 31.8)  | 923 (709 to 1220)   | 1.6 (1.3 to 2.1)  | -8.2 (-29.8 to 23.7)   | 29700 (22200 to 39600)    | 45.5 (34.8 to 60)      | -9 (-32.3 to 24.5)     |
| Palau            | Both   | 0 (0 to 0)          | 0.9 (0.7 to 1.1) | -1.2 (-19 to 22.9)    | 0 (0 to 0)          | 0.6 (0.4 to 0.7)  | -5.9 (-22.2 to 16.2)   | 3 (3 to 5)                | 14.3 (11 to 18.3)      | -5.4 (-22.8 to 18.5)   |
|                  | Male   | 0 (0 to 0)          | 0.8 (0.6 to 1.1) | 0.4 (-18.8 to 25.3)   | 0 (0 to 0)          | 0.6 (0.4 to 0.7)  | -4 (-22.5 to 19)       | 1 (1 to 2)                | 12.5 (9.7 to 15.8)     | -4 (-21.8 to 19.2)     |
|                  | Female | 0 (0 to 0)          | 0.9 (0.7 to 1.3) | -2.2 (-25.8 to 32.1)  | 0 (0 to 0)          | 0.6 (0.4 to 0.8)  | -6.4 (-28.3 to 23.6)   | 2 (1 to 3)                | 16.6 (11.9 to 22.6)    | -6.4 (-29.1 to 25.8)   |
| Palestine        | Both   | 30 (25 to 36)       | 1.3 (1.1 to 1.5) | 7.5 (-12.3 to 30)     | 21 (18 to 26)       | 1 (0.8 to 1.2)    | -3.2 (-20.8 to 16.5)   | 562 (459 to 679)          | 22.4 (18.5 to 27.1)    | -2.9 (-21.2 to 18.2)   |
|                  | Male   | 28 (23 to 33)       | 2.5 (2.1 to 3)   | 3.1 (-16.7 to 26)     | 20 (16 to 24)       | 2 (1.6 to 2.4)    | -6.5 (-23.3 to 13.3)   | 515 (417 to 626)          | 43.1 (35.5 to 52.2)    | -6.6 (-24.4 to 14.5)   |
|                  | Female | 2 (2 to 3)          | 0.2 (0.2 to 0.2) | 7.7 (-15.5 to 37.6)   | 2 (1 to 2)          | 0.1 (0.1 to 0.2)  | -3.1 (-23.7 to 22.4)   | 46 (37 to 57)             | 3.4 (2.8 to 4.2)       | -4.4 (-24.4 to 19.6)   |
| Panama           | Both   | 61 (45 to 80)       | 1.5 (1.1 to 1.9) | -13.9 (-36.4 to 14.9) | 43 (32 to 55)       | 1 (0.8 to 1.3)    | -21.4 (-41.1 to 2.6)   | 983 (726 to 1310)         | 23.7 (17.5 to 31.5)    | -22.3 (-43.1 to 3.4)   |
|                  | Male   | 54 (40 to 72)       | 2.7 (2 to 3.6)   | -13.5 (-36.7 to 15.6) | 38 (28 to 50)       | 1.9 (1.4 to 2.5)  | -21 (-41.4 to 4)       | 879 (641 to 1170)         | 43.3 (31.6 to 57.6)    | -21.8 (-43.4 to 4.6)   |
|                  | Female | 7 (5 to 9)          | 0.3 (0.2 to 0.4) | -11.5 (-33.5 to 15.9) | 5 (3 to 6)          | 0.2 (0.2 to 0.3)  | -19.2 (-38.9 to 4.1)   | 104 (78 to 139)           | 4.9 (3.7 to 6.5)       | -21.3 (-41.1 to 3.4)   |
| Papua New Guinea | Both   | 39 (28 to 52)       | 0.9 (0.6 to 1.2) | -2.1 (-17.6 to 17)    | 35 (26 to 48)       | 0.9 (0.6 to 1.1)  | -3.3 (-18.3 to 15.5)   | 993 (712 to 1360)         | 19.5 (14.2 to 26.2)    | -4.5 (-20.6 to 14.7)   |
|                  | Male   | 31 (21 to 42)       | 1.4 (1 to 1.8)   | -2.8 (-20.4 to 19.2)  | 28 (20 to 38)       | 1.4 (1 to 1.8)    | -4.3 (-21.2 to 16.8)   | 766 (533 to 1070)         | 29.5 (21.2 to 39.9)    | -4.6 (-23 to 18.5)     |
|                  | Female | 8 (6 to 12)         | 0.3 (0.2 to 0.5) | -3.7 (-26.1 to 26.8)  | 7 (5 to 11)         | 0.3 (0.2 to 0.5)  | -5 (-26.2 to 24.3)     | 227 (153 to 326)          | 8.7 (5.9 to 12.4)      | -5.7 (-28.7 to 26.7)   |
| Paraguay         | Both   | 113 (83 to 149)     | 2 (1.5 to 2.6)   | 15.2 (-16.3 to 56.5)  | 84 (63 to 110)      | 1.5 (1.1 to 2)    | 5.4 (-22.5 to 41.9)    | 2230 (1640 to 2960)       | 38.6 (28.5 to 51)      | 5.7 (-23.4 to 43.3)    |

|             |        |                     |                   |                       |                     |                  |                        |                        |                        |                        |
|-------------|--------|---------------------|-------------------|-----------------------|---------------------|------------------|------------------------|------------------------|------------------------|------------------------|
|             | Male   | 104 (76 to 138)     | 3.8 (2.8 to 5)    | 15.4 (-16.4 to 57.2)  | 77 (57 to 101)      | 2.9 (2.2 to 3.8) | 5.7 (-22.2 to 42.3)    | 2070 (1510 to 2760)    | 73.3 (53.8 to 97.4)    | 6.1 (-23.5 to 44.3)    |
|             | Female | 9 (7 to 12)         | 0.3 (0.2 to 0.4)  | 14.8 (-16.3 to 54.2)  | 7 (5 to 9)          | 0.2 (0.2 to 0.3) | 5.4 (-22 to 40.6)      | 163 (121 to 214)       | 5.5 (4.1 to 7.2)       | 5 (-23.6 to 42.1)      |
| Peru        | Both   | 229 (168 to 309)    | 0.7 (0.5 to 1)    | -9.5 (-36.3 to 25.4)  | 180 (132 to 242)    | 0.6 (0.4 to 0.8) | -17.1 (-41.4 to 14)    | 3860 (2810 to 5260)    | 12.1 (8.8 to 16.4)     | -18.8 (-43.8 to 14.2)  |
|             | Male   | 180 (131 to 248)    | 1.2 (0.9 to 1.6)  | -8.2 (-36.5 to 29.6)  | 145 (105 to 197)    | 1 (0.7 to 1.3)   | -15.7 (-40.7 to 18.3)  | 3000 (2150 to 4180)    | 19.5 (14.1 to 27.1)    | -17 (-43.2 to 17.9)    |
|             | Female | 49 (36 to 65)       | 0.3 (0.2 to 0.4)  | -12.4 (-38.8 to 23.8) | 36 (26 to 47)       | 0.2 (0.2 to 0.3) | -20.7 (-43.7 to 10.4)  | 863 (630 to 1160)      | 5.1 (3.7 to 6.9)       | -22.6 (-47.4 to 10.2)  |
| Philippines | Both   | 874 (694 to 1110)   | 1.1 (0.9 to 1.4)  | -1.5 (-22.7 to 24.1)  | 691 (551 to 869)    | 0.9 (0.7 to 1.1) | -5.1 (-24.1 to 17)     | 18800 (15000 to 24000) | 22.4 (17.8 to 28.3)    | -5.1 (-24.7 to 18.3)   |
|             | Male   | 725 (553 to 954)    | 2 (1.5 to 2.6)    | 0.7 (-24.9 to 31.1)   | 562 (424 to 737)    | 1.6 (1.2 to 2.1) | -2.7 (-27.1 to 25.8)   | 15500 (11700 to 20500) | 39.2 (29.9 to 51.5)    | -3.5 (-27.7 to 25.5)   |
|             | Female | 149 (115 to 190)    | 0.4 (0.3 to 0.5)  | -8.2 (-29.1 to 17.8)  | 129 (100 to 163)    | 0.3 (0.3 to 0.4) | -10.7 (-30.1 to 12.5)  | 3360 (2560 to 4280)    | 7.7 (5.9 to 9.7)       | -10.7 (-31.5 to 15)    |
| Poland      | Both   | 2740 (2200 to 3440) | 4.2 (3.3 to 5.3)  | -8.6 (-27.1 to 15.5)  | 1780 (1430 to 2200) | 2.6 (2.1 to 3.3) | -14 (-31.5 to 6.4)     | 45600 (36500 to 56400) | 71.1 (56.6 to 88.1)    | -15.8 (-33.2 to 4.4)   |
|             | Male   | 2400 (1870 to 3110) | 8.1 (6.3 to 10.4) | -11 (-30.5 to 15.2)   | 1590 (1230 to 2020) | 5.4 (4.2 to 6.8) | -15.8 (-34.6 to 6.4)   | 41000 (31700 to 52100) | 138.9 (107.4 to 176.9) | -17.5 (-36.7 to 4.4)   |
|             | Female | 337 (245 to 435)    | 1 (0.7 to 1.2)    | -3.6 (-25.8 to 24)    | 189 (142 to 237)    | 0.5 (0.4 to 0.6) | -11.1 (-30.5 to 11.8)  | 4660 (3490 to 5880)    | 13.5 (10.1 to 17.1)    | -12.8 (-32.1 to 9.2)   |
| Portugal    | Both   | 557 (423 to 723)    | 2.8 (2.1 to 3.6)  | -18.7 (-39.3 to 6.8)  | 392 (355 to 429)    | 1.8 (1.7 to 2)   | -22.4 (-30.4 to -13.7) | 9600 (8610 to 10600)   | 50.4 (45.2 to 55.7)    | -25.8 (-34.3 to -16.3) |
|             | Male   | 521 (394 to 678)    | 5.7 (4.3 to 7.4)  | -19.5 (-40 to 6.1)    | 369 (333 to 405)    | 3.9 (3.5 to 4.2) | -22.9 (-31.1 to -14)   | 9180 (8190 to 10100)   | 104.2 (93.3 to 115.6)  | -26.1 (-34.6 to -16.3) |
|             | Female | 36 (27 to 50)       | 0.3 (0.2 to 0.4)  | 0.8 (-24.5 to 32.9)   | 23 (19 to 28)       | 0.2 (0.1 to 0.2) | -8 (-19.7 to 5.2)      | 426 (360 to 573)       | 3.8 (3.2 to 5.4)       | -7.2 (-19.9 to 7.3)    |
| Puerto Rico | Both   | 113 (85 to 147)     | 1.7 (1.3 to 2.2)  | -2.5 (-26.5 to 27.9)  | 64 (49 to 82)       | 0.9 (0.7 to 1.2) | -7.7 (-29.8 to 19.6)   | 1400 (1050 to 1820)    | 22.2 (16.6 to 29.2)    | -7.6 (-31.1 to 21.1)   |
|             | Male   | 99 (74 to 130)      | 3.4 (2.5 to 4.4)  | -2.8 (-27.4 to 27.6)  | 56 (43 to 73)       | 1.8 (1.4 to 2.4) | -8 (-30.7 to 19.3)     | 1250 (936 to 1640)     | 43.7 (32.2 to 58)      | -7.9 (-31.6 to 21.4)   |
|             | Female | 13 (10 to 20)       | 0.4 (0.3 to 0.5)  | -2.6 (-26.1 to 27.2)  | 8 (6 to 11)         | 0.2 (0.1 to 0.3) | -7.7 (-29.6 to 19.8)   | 155 (114 to 225)       | 4.4 (3.2 to 6.4)       | -8 (-31.2 to 21)       |
| Qatar       | Both   | 30 (20 to 43)       | 4.5 (2.9 to 6.1)  | -0.4 (-27.4 to 38.7)  | 14 (9 to 19)        | 2.9 (2 to 4)     | -3 (-27.8 to 34.5)     | 414 (273 to 581)       | 49.6 (32.4 to 67.5)    | -14.2 (-37.4 to 19.6)  |
|             | Male   | 29 (18 to 41)       | 5.7 (3.7 to 7.8)  | -7.8 (-33.5 to 29.7)  | 13 (8 to 18)        | 3.7 (2.5 to 5.1) | -10.6 (-33.7 to 25.4)  | 389 (253 to 551)       | 63.5 (41.2 to 87.2)    | -20.4 (-42.3 to 11.6)  |

|                       |        |                     |                    |                       |                     |                  |                        |                          |                        |                        |
|-----------------------|--------|---------------------|--------------------|-----------------------|---------------------|------------------|------------------------|--------------------------|------------------------|------------------------|
|                       | Female | 2 (1 to 2)          | 0.6 (0.4 to 0.8)   | -12.2 (-32.8 to 12.9) | 1 (0 to 1)          | 0.3 (0.2 to 0.4) | -23 (-39.8 to -1.4)    | 26 (18 to 35)            | 6.9 (5.2 to 9)         | -22.8 (-40.3 to -1.3)  |
| South Korea           | Both   | 2230 (1770 to 2800) | 2.5 (1.9 to 3.1)   | -5.2 (-24.2 to 16.2)  | 518 (450 to 606)    | 0.6 (0.5 to 0.7) | -15.3 (-25.8 to -3.7)  | 11700 (10100 to 13800)   | 12.9 (11.3 to 15.2)    | -16.3 (-26.9 to -3.6)  |
|                       | Male   | 2040 (1600 to 2590) | 5 (3.9 to 6.2)     | -9.5 (-28 to 11.8)    | 465 (402 to 550)    | 1.3 (1.1 to 1.5) | -19 (-30.3 to -6.8)    | 10500 (9090 to 12600)    | 25.8 (22.3 to 30.7)    | -19.9 (-31.1 to -7.4)  |
|                       | Female | 195 (153 to 243)    | 0.4 (0.3 to 0.5)   | -10.2 (-28.9 to 12.7) | 53 (43 to 63)       | 0.1 (0.1 to 0.1) | -23.2 (-35.1 to -9.6)  | 1120 (943 to 1340)       | 2.4 (2.1 to 2.9)       | -20 (-30.8 to -6.3)    |
| Moldova               | Both   | 202 (171 to 235)    | 3.5 (2.9 to 4)     | -17 (-31 to -1.9)     | 140 (119 to 163)    | 2.4 (2 to 2.8)   | -23.9 (-36.2 to -10.7) | 4170 (3530 to 4870)      | 73.3 (62 to 85.5)      | -25.5 (-37.9 to -12)   |
|                       | Male   | 194 (164 to 227)    | 7.7 (6.5 to 9)     | -16.4 (-30.6 to -1.3) | 135 (114 to 158)    | 5.4 (4.6 to 6.3) | -23.2 (-35.8 to -10.1) | 4040 (3400 to 4720)      | 160.5 (135.6 to 187.2) | -25.1 (-37.7 to -11.8) |
|                       | Female | 7 (6 to 9)          | 0.2 (0.2 to 0.3)   | -27 (-41.5 to -4.4)   | 5 (4 to 6)          | 0.1 (0.1 to 0.2) | -33.6 (-46.3 to -14.2) | 134 (110 to 170)         | 4.4 (3.6 to 5.5)       | -35.2 (-47.8 to -14.7) |
| Romania               | Both   | 1900 (1510 to 2320) | 5.9 (4.6 to 7.2)   | 1.7 (-20.1 to 26.4)   | 1030 (834 to 1250)  | 3.1 (2.4 to 3.7) | -7.8 (-26.9 to 12.3)   | 28600 (22600 to 34900)   | 89.8 (70.5 to 110.4)   | -9.4 (-29 to 11.9)     |
|                       | Male   | 1800 (1420 to 2210) | 11.9 (9.3 to 14.7) | 0.4 (-21.1 to 24.9)   | 972 (782 to 1180)   | 6.3 (5 to 7.7)   | -8.4 (-27.1 to 11.6)   | 27100 (21400 to 33200)   | 180.3 (141.4 to 221)   | -10.5 (-29.8 to 10.6)  |
|                       | Female | 99 (77 to 124)      | 0.6 (0.4 to 0.7)   | 3.5 (-18.8 to 32.3)   | 61 (48 to 74)       | 0.3 (0.2 to 0.4) | -7 (-26.5 to 16.6)     | 1510 (1180 to 1890)      | 9 (6.9 to 11.3)        | -6.4 (-27.2 to 18.7)   |
| Russia                | Both   | 6930 (5720 to 8310) | 3 (2.5 to 3.6)     | -14.1 (-28.9 to 3.3)  | 4110 (3400 to 4920) | 1.8 (1.5 to 2.1) | -23.8 (-37.2 to -9.1)  | 114000 (93700 to 136000) | 50.1 (41.2 to 59.8)    | -24.6 (-38 to -9.9)    |
|                       | Male   | 6500 (5290 to 7870) | 6.8 (5.6 to 8.3)   | -17 (-32.4 to 0.7)    | 3850 (3150 to 4660) | 4.2 (3.4 to 5)   | -26.2 (-39.4 to -11.1) | 107000 (87700 to 129000) | 112.4 (92.1 to 135.6)  | -26.9 (-40.3 to -11.5) |
|                       | Female | 434 (349 to 532)    | 0.3 (0.3 to 0.4)   | 0.5 (-19.3 to 25.5)   | 264 (216 to 321)    | 0.2 (0.2 to 0.2) | -12.3 (-28.3 to 8.7)   | 6800 (5540 to 8350)      | 5.4 (4.3 to 6.6)       | -11.6 (-28.6 to 10.5)  |
| Rwanda                | Both   | 89 (68 to 120)      | 1.4 (1.1 to 1.9)   | -1.8 (-19.3 to 20.2)  | 81 (62 to 110)      | 1.3 (1 to 1.8)   | -4.6 (-20.8 to 15.8)   | 2390 (1780 to 3230)      | 34.6 (26.4 to 46.3)    | -5.2 (-23.5 to 18.2)   |
|                       | Male   | 69 (51 to 99)       | 2.6 (1.9 to 3.6)   | -2.3 (-20.9 to 20.8)  | 63 (47 to 90)       | 2.5 (1.9 to 3.4) | -4.9 (-22.3 to 16.3)   | 1860 (1350 to 2650)      | 63 (46.7 to 89)        | -5.7 (-25.2 to 18.5)   |
|                       | Female | 20 (15 to 26)       | 0.5 (0.4 to 0.7)   | -4.2 (-25.5 to 23.2)  | 18 (14 to 23)       | 0.5 (0.4 to 0.7) | -6.9 (-27 to 19)       | 527 (389 to 704)         | 13.4 (10.2 to 17.7)    | -7.8 (-29.1 to 20.3)   |
| Saint Kitts and Nevis | Both   | 2 (1 to 2)          | 2.5 (2.1 to 3)     | 30.6 (10.9 to 53.7)   | 1 (1 to 1)          | 1.7 (1.4 to 2)   | 21.3 (4.4 to 41.1)     | 31 (25 to 37)            | 41.9 (34.1 to 50.1)    | 25 (4.4 to 48.1)       |
|                       | Male   | 2 (1 to 2)          | 5.1 (4.3 to 6.1)   | 26.2 (7.9 to 48.5)    | 1 (1 to 1)          | 3.5 (3 to 4.1)   | 15.6 (-0.1 to 34.5)    | 30 (24 to 37)            | 84.1 (68.9 to 100.2)   | 21.9 (2.1 to 44.3)     |

|                                  |        |                  |                  |                       |                 |                  |                       |                     |                        |                       |
|----------------------------------|--------|------------------|------------------|-----------------------|-----------------|------------------|-----------------------|---------------------|------------------------|-----------------------|
|                                  | Female | 0 (0 to 0)       | 0.1 (0.1 to 0.1) | -4.5 (-22.2 to 18.1)  | 0 (0 to 0)      | 0.1 (0.1 to 0.1) | -6.9 (-22.8 to 11.9)  | 1 (0 to 1)          | 1.6 (1.2 to 2)         | -8.5 (-26.6 to 12)    |
| Saint Lucia                      | Both   | 6 (5 to 7)       | 2.8 (2.3 to 3.3) | 13.4 (-6.9 to 35.2)   | 5 (4 to 5)      | 2.1 (1.8 to 2.5) | 11.5 (-8 to 32.2)     | 116 (96 to 139)     | 52.3 (43.5 to 62.5)    | 9.1 (-10.5 to 30.8)   |
|                                  | Male   | 6 (5 to 7)       | 5.4 (4.5 to 6.4) | 11.6 (-8.6 to 34.2)   | 4 (4 to 5)      | 4.2 (3.5 to 5)   | 9.4 (-9.8 to 30.6)    | 107 (89 to 129)     | 100.6 (83.3 to 120.5)  | 7.7 (-12.2 to 29.4)   |
|                                  | Female | 0 (0 to 1)       | 0.4 (0.3 to 0.5) | 20.8 (-2.2 to 45.9)   | 0 (0 to 0)      | 0.3 (0.3 to 0.4) | 19 (-1.9 to 42.9)     | 9 (7 to 10)         | 7.5 (6.1 to 9.1)       | 15 (-6.9 to 40.3)     |
| Saint Vincent and the Grenadines | Both   | 5 (4 to 6)       | 3.5 (3 to 4)     | 17.7 (-0.5 to 38.8)   | 4 (3 to 5)      | 2.9 (2.5 to 3.3) | 17.1 (-0.3 to 36.9)   | 99 (85 to 117)      | 71.2 (61.3 to 83.2)    | 15.2 (-3.6 to 37.3)   |
|                                  | Male   | 5 (4 to 5)       | 6.4 (5.6 to 7.5) | 13.7 (-3.8 to 34.1)   | 4 (3 to 4)      | 5.4 (4.7 to 6.2) | 12.2 (-4.6 to 31.1)   | 95 (81 to 111)      | 131.4 (113.1 to 153.6) | 12.5 (-6.1 to 34.7)   |
|                                  | Female | 0 (0 to 0)       | 0.3 (0.3 to 0.4) | 9 (-7.9 to 28.9)      | 0 (0 to 0)      | 0.3 (0.2 to 0.3) | 7.7 (-8.5 to 26.8)    | 4 (4 to 5)          | 6.8 (5.7 to 8.1)       | 7.7 (-9.3 to 28.4)    |
| Samoa                            | Both   | 1 (1 to 2)       | 0.9 (0.8 to 1.1) | -2.7 (-18 to 16.7)    | 1 (1 to 1)      | 0.8 (0.6 to 0.9) | -5.2 (-19.3 to 11.9)  | 26 (21 to 32)       | 17.6 (14.3 to 21.4)    | -5.5 (-20.8 to 14.1)  |
|                                  | Male   | 1 (1 to 1)       | 1.4 (1.2 to 1.8) | -3.8 (-19.9 to 16.4)  | 1 (1 to 1)      | 1.2 (1 to 1.5)   | -6.3 (-21.6 to 12.1)  | 18 (15 to 23)       | 25.9 (20.9 to 31.8)    | -6.5 (-22 to 13.9)    |
|                                  | Female | 0 (0 to 0)       | 0.5 (0.3 to 0.6) | -2.5 (-26.6 to 29.3)  | 0 (0 to 0)      | 0.4 (0.3 to 0.5) | -4.6 (-26.6 to 26.2)  | 8 (6 to 11)         | 10.1 (7.4 to 13.6)     | -5.3 (-28.8 to 26.3)  |
| San Marino                       | Both   | 2 (2 to 3)       | 4 (2.8 to 5.4)   | 5.9 (-19 to 35)       | 1 (1 to 1)      | 1.3 (0.8 to 1.9) | 0.3 (-29.4 to 36.4)   | 19 (12 to 28)       | 34.2 (21.2 to 50.8)    | 0.7 (-30.3 to 40.3)   |
|                                  | Male   | 2 (2 to 3)       | 8 (5.7 to 10.8)  | 6.6 (-18.8 to 35.7)   | 1 (1 to 1)      | 2.7 (1.8 to 4)   | -0.1 (-29.4 to 35.5)  | 18 (12 to 27)       | 68.4 (42.8 to 101.3)   | 2 (-29.1 to 41.6)     |
|                                  | Female | 0 (0 to 0)       | 0.2 (0.1 to 0.3) | 0.1 (-27.4 to 33.8)   | 0 (0 to 0)      | 0.1 (0.1 to 0.1) | -6 (-37.7 to 38.7)    | 1 (0 to 1)          | 2.3 (1.4 to 3.6)       | -4.2 (-36.3 to 41.3)  |
| São Tome and Príncipe            | Both   | 1 (1 to 2)       | 1.2 (1 to 1.5)   | 9.7 (-10.7 to 33.3)   | 1 (1 to 1)      | 1.2 (1 to 1.4)   | 6.1 (-13.1 to 28.7)   | 28 (22 to 36)       | 26.1 (20.6 to 32.7)    | 5.5 (-15.5 to 30.1)   |
|                                  | Male   | 1 (1 to 1)       | 2.4 (1.9 to 3)   | 10.3 (-11.3 to 35.3)  | 1 (1 to 1)      | 2.4 (1.9 to 2.9) | 6.9 (-13.1 to 29.8)   | 26 (20 to 33)       | 50.2 (39.7 to 62.9)    | 5.7 (-15.9 to 30.5)   |
|                                  | Female | 0 (0 to 0)       | 0.2 (0.1 to 0.2) | 0.1 (-20.8 to 26)     | 0 (0 to 0)      | 0.2 (0.1 to 0.2) | -3.3 (-23 to 21.2)    | 2 (2 to 3)          | 3.9 (3 to 5.3)         | -4.5 (-24.9 to 21.3)  |
| Saudi Arabia                     | Both   | 222 (167 to 297) | 1.1 (0.8 to 1.4) | -3 (-21.6 to 19.5)    | 115 (88 to 153) | 0.6 (0.5 to 0.8) | -19.4 (-34 to -2.3)   | 3770 (2800 to 5090) | 16 (12.6 to 21.1)      | -18.5 (-35 to 0.9)    |
|                                  | Male   | 192 (142 to 256) | 1.6 (1.2 to 2.1) | -4.3 (-23.3 to 18.6)  | 101 (77 to 135) | 1 (0.8 to 1.3)   | -20.7 (-35.4 to -2.5) | 3250 (2380 to 4430) | 23.3 (18.4 to 30.9)    | -18.9 (-35.9 to 1)    |
|                                  | Female | 30 (21 to 42)    | 0.3 (0.2 to 0.4) | -11.9 (-34.3 to 15.2) | 14 (10 to 19)   | 0.2 (0.1 to 0.2) | -28.5 (-44.8 to -7)   | 518 (367 to 708)    | 4.7 (3.5 to 6.4)       | -27.3 (-44.8 to -3.7) |
| Senegal                          | Both   | 91 (69 to 118)   | 1.2 (0.9 to 1.6) | 4 (-19.4 to 32.1)     | 87 (67 to 112)  | 1.2 (0.9 to 1.6) | 2 (-19.7 to 28)       | 2240 (1650 to 2950) | 28.5 (21.5 to 37.1)    | 2.3 (-22.5 to 32.4)   |
|                                  | Male   | 81 (60 to 107)   | 2.3 (1.7 to 3)   | 5 (-18.8 to 34.5)     | 78 (58 to 101)  | 2.3 (1.8 to 3)   | 3 (-19.5 to 30.3)     | 2000 (1450 to 2660) | 53.1 (39.3 to 69.9)    | 3.3 (-21.8 to 34.9)   |
|                                  | Female | 9 (7 to 12)      | 0.2 (0.2 to 0.3) | 4.5 (-22.2 to 37.7)   | 9 (7 to 11)     | 0.2 (0.2 to 0.3) | 2.7 (-22.5 to 33.5)   | 233 (169 to 306)    | 5.6 (4.1 to 7.4)       | 2 (-24.9 to 33.6)     |

|                 |        |                   |                     |                       |                  |                    |                        |                       |                        |                        |
|-----------------|--------|-------------------|---------------------|-----------------------|------------------|--------------------|------------------------|-----------------------|------------------------|------------------------|
| Serbia          | Both   | 984 (747 to 1260) | 6.5 (5 to 8.4)      | -5.1 (-25.9 to 22.4)  | 459 (352 to 581) | 2.9 (2.3 to 3.7)   | -14.5 (-32.9 to 9.2)   | 11700 (8930 to 15000) | 79.1 (60.4 to 101.8)   | -14.9 (-34.2 to 9.8)   |
|                 | Male   | 873 (657 to 1130) | 12.3 (9.3 to 16)    | -6.2 (-27.4 to 22.2)  | 415 (318 to 531) | 5.7 (4.4 to 7.3)   | -15.1 (-33.6 to 8.9)   | 10600 (8020 to 13700) | 151.6 (114.6 to 195.5) | -15.7 (-35 to 9.5)     |
|                 | Female | 111 (83 to 145)   | 1.4 (1 to 1.8)      | -2.5 (-27.9 to 29.1)  | 44 (34 to 56)    | 0.5 (0.4 to 0.7)   | -14.3 (-35 to 10.6)    | 1070 (803 to 1380)    | 13.8 (10.3 to 17.8)    | -13.8 (-36.1 to 13.7)  |
| Seychelles      | Both   | 9 (7 to 11)       | 7.6 (6.3 to 9.1)    | 8.5 (-10.6 to 30.8)   | 6 (5 to 7)       | 5.1 (4.3 to 6.1)   | 0.8 (-15.5 to 19.5)    | 151 (125 to 180)      | 127.5 (106 to 152.1)   | 0.9 (-17.5 to 21.9)    |
|                 | Male   | 8 (7 to 10)       | 15.1 (12.5 to 18.2) | 3.6 (-15.7 to 25.8)   | 5 (4 to 6)       | 10.4 (8.8 to 12.4) | -4.3 (-20.5 to 14.7)   | 142 (116 to 172)      | 245.1 (203 to 295)     | -3 (-20.5 to 18.1)     |
|                 | Female | 1 (0 to 1)        | 0.9 (0.7 to 1.1)    | 8.5 (-13.2 to 34.7)   | 0 (0 to 0)       | 0.7 (0.6 to 0.8)   | 2.3 (-18.1 to 26.9)    | 9 (7 to 11)           | 15.8 (12.7 to 19.3)    | 2 (-18.4 to 27.3)      |
| Sierra Leone    | Both   | 47 (35 to 63)     | 1.3 (1 to 1.8)      | -1.9 (-22.1 to 24.5)  | 45 (34 to 60)    | 1.3 (1 to 1.8)     | -4.4 (-23.6 to 20.7)   | 1200 (871 to 1630)    | 31.7 (23.5 to 42.9)    | -4.1 (-24.7 to 22.1)   |
|                 | Male   | 42 (31 to 57)     | 2.4 (1.8 to 3.2)    | -3.4 (-23.9 to 23.9)  | 40 (30 to 54)    | 2.4 (1.8 to 3.2)   | -5.6 (-25.1 to 19.6)   | 1060 (759 to 1460)    | 56 (40.8 to 76.6)      | -5.6 (-26.7 to 21.3)   |
|                 | Female | 5 (4 to 7)        | 0.3 (0.2 to 0.4)    | -5.7 (-26.4 to 21.5)  | 5 (4 to 7)       | 0.3 (0.2 to 0.4)   | -7.6 (-27.8 to 17.6)   | 133 (94 to 185)       | 6.9 (4.9 to 9.5)       | -8.8 (-30 to 19.7)     |
| Singapore       | Both   | 148 (114 to 190)  | 1.9 (1.4 to 2.4)    | -22.3 (-39.3 to -1.5) | 35 (30 to 40)    | 0.5 (0.4 to 0.5)   | -27.8 (-36.2 to -17.3) | 797 (693 to 916)      | 10.1 (8.8 to 11.6)     | -29.2 (-37.2 to -18.4) |
|                 | Male   | 133 (101 to 171)  | 3.5 (2.7 to 4.5)    | -26.6 (-43.3 to -6.5) | 31 (27 to 35)    | 0.9 (0.8 to 1.1)   | -31.8 (-40.5 to -21)   | 706 (608 to 820)      | 18.6 (16 to 21.6)      | -33 (-41 to -22.1)     |
|                 | Female | 16 (12 to 21)     | 0.4 (0.3 to 0.5)    | -3.8 (-26.4 to 24.7)  | 4 (3 to 5)       | 0.1 (0.1 to 0.1)   | -13.2 (-25.8 to 1.6)   | 91 (76 to 112)        | 2.3 (1.9 to 2.8)       | -13.8 (-25.2 to 0)     |
| Slovakia        | Both   | 314 (236 to 417)  | 3.5 (2.6 to 4.6)    | -8.9 (-32.1 to 22.5)  | 177 (134 to 233) | 1.9 (1.5 to 2.5)   | -16.1 (-36.4 to 10.5)  | 4840 (3610 to 6380)   | 55.1 (40.9 to 72.9)    | -16.9 (-38 to 10.7)    |
|                 | Male   | 295 (220 to 396)  | 7.2 (5.4 to 9.5)    | -11.9 (-34.3 to 18.5) | 167 (125 to 221) | 4.1 (3.1 to 5.4)   | -18.6 (-38.4 to 7.5)   | 4590 (3400 to 6080)   | 112.4 (83.5 to 148.6)  | -19.3 (-39.6 to 7.6)   |
|                 | Female | 19 (14 to 25)     | 0.4 (0.3 to 0.5)    | -2.5 (-29.6 to 32.1)  | 10 (7 to 13)     | 0.2 (0.1 to 0.3)   | -11.6 (-34.3 to 14.8)  | 250 (183 to 332)      | 5.4 (4 to 7.3)         | -12.2 (-35.8 to 17.1)  |
| Slovenia        | Both   | 128 (98 to 170)   | 3.3 (2.5 to 4.4)    | -7 (-29.4 to 25.2)    | 54 (41 to 70)    | 1.3 (1 to 1.7)     | -16.4 (-35.6 to 11.5)  | 1300 (989 to 1750)    | 34.6 (26.2 to 46.3)    | -18 (-38.2 to 10.5)    |
|                 | Male   | 116 (88 to 155)   | 6.3 (4.8 to 8.4)    | -10.4 (-31.9 to 19.9) | 48 (37 to 63)    | 2.6 (2 to 3.4)     | -19.8 (-38.1 to 6.9)   | 1170 (885 to 1570)    | 65 (49.1 to 86.7)      | -20.7 (-39.9 to 7.4)   |
|                 | Female | 13 (9 to 17)      | 0.6 (0.4 to 0.9)    | -1 (-27.8 to 36.4)    | 6 (4 to 8)       | 0.3 (0.2 to 0.3)   | -11.5 (-34.2 to 17.5)  | 131 (91 to 179)       | 6.7 (4.7 to 9.2)       | -11.2 (-34.8 to 20.8)  |
| Solomon Islands | Both   | 5 (3 to 6)        | 1.6 (1.1 to 2)      | 2 (-16.3 to 23)       | 4 (3 to 5)       | 1.4 (1 to 1.8)     | -2.3 (-18.9 to 17.4)   | 127 (78 to 171)       | 35.5 (23.3 to 46.5)    | -2.4 (-20.4 to 19.7)   |
|                 | Male   | 4 (2 to 5)        | 2.4 (1.5 to 3.1)    | 2.9 (-17.2 to 27.1)   | 3 (2 to 4)       | 2.2 (1.4 to 2.8)   | -1.2 (-19.5 to 20.4)   | 94 (49 to 130)        | 52.6 (30.5 to 69.7)    | -1.9 (-21.2 to 22.9)   |



|              |        |                     |                  |                        |                     |                  |                        |                        |                     |                        |
|--------------|--------|---------------------|------------------|------------------------|---------------------|------------------|------------------------|------------------------|---------------------|------------------------|
|              | Female | 1 (1 to 2)          | 0.7 (0.5 to 0.9) | 6.9 (-17.6 to 42.2)    | 1 (1 to 1)          | 0.6 (0.4 to 0.8) | 3 (-19.5 to 35.4)      | 33 (20 to 46)          | 17.8 (11.6 to 23.8) | 1.8 (-22.3 to 36.2)    |
| Somalia      | Both   | 100 (69 to 141)     | 1.4 (0.9 to 1.9) | -7.7 (-25.1 to 14.8)   | 97 (68 to 136)      | 1.4 (1 to 1.9)   | -8.2 (-25 to 13.4)     | 3140 (2160 to 4470)    | 38.4 (26.8 to 53.9) | -8.4 (-26.5 to 16.1)   |
|              | Male   | 75 (49 to 106)      | 2.4 (1.6 to 3.3) | -8.5 (-26.9 to 15.8)   | 73 (48 to 102)      | 2.4 (1.6 to 3.3) | -8.9 (-26.6 to 13.5)   | 2360 (1510 to 3360)    | 66.1 (43.2 to 92.2) | -9.3 (-28.1 to 16.2)   |
|              | Female | 25 (16 to 37)       | 0.6 (0.4 to 0.9) | -4.5 (-26.8 to 25.7)   | 24 (16 to 36)       | 0.6 (0.4 to 0.9) | -4.9 (-26.4 to 24)     | 782 (503 to 1170)      | 17.1 (11.3 to 25.7) | -5.9 (-28.1 to 25.1)   |
| South Africa | Both   | 738 (663 to 824)    | 1.6 (1.4 to 1.8) | -23.4 (-30.4 to -14.2) | 616 (560 to 680)    | 1.4 (1.2 to 1.5) | -26.8 (-32.9 to -18.9) | 17100 (15400 to 19000) | 35.5 (32 to 39.3)   | -29.3 (-35.6 to -20.7) |
|              | Male   | 629 (561 to 716)    | 3.2 (2.9 to 3.6) | -23.9 (-31.2 to -14.3) | 524 (472 to 589)    | 2.8 (2.6 to 3.1) | -27.2 (-33.5 to -18.2) | 14600 (13000 to 16500) | 70.4 (63.2 to 79.4) | -29.7 (-36.5 to -20.4) |
|              | Female | 109 (97 to 124)     | 0.4 (0.4 to 0.5) | -22.8 (-31.7 to -13.1) | 92 (82 to 104)      | 0.4 (0.3 to 0.4) | -25.7 (-33.9 to -16.6) | 2450 (2170 to 2790)    | 9.1 (8 to 10.3)     | -29.2 (-38.5 to -18.9) |
| South Sudan  | Both   | 39 (26 to 57)       | 1 (0.7 to 1.4)   | -9 (-26.5 to 13.9)     | 37 (25 to 54)       | 1 (0.7 to 1.4)   | -9.7 (-27.1 to 13.8)   | 1100 (726 to 1630)     | 24.7 (16.8 to 36.1) | -10.2 (-29 to 14.8)    |
|              | Male   | 31 (20 to 48)       | 1.5 (1 to 2.3)   | -7.2 (-25.7 to 17.5)   | 30 (20 to 46)       | 1.5 (1 to 2.3)   | -7.9 (-26.5 to 16.9)   | 862 (557 to 1350)      | 37.4 (24.6 to 58.5) | -8.2 (-28.1 to 18.8)   |
|              | Female | 8 (5 to 11)         | 0.4 (0.3 to 0.6) | -5.5 (-26.5 to 23.1)   | 7 (5 to 11)         | 0.4 (0.3 to 0.5) | -5.9 (-27.7 to 23.7)   | 234 (151 to 342)       | 10.4 (7 to 15)      | -6.3 (-28.6 to 25.5)   |
| Spain        | Both   | 3740 (2810 to 4850) | 4.5 (3.4 to 5.8) | -16.5 (-37 to 11.5)    | 1500 (1370 to 1650) | 1.6 (1.5 to 1.8) | -19.1 (-26.8 to -10.4) | 34400 (31100 to 38100) | 41.8 (37.7 to 46.3) | -21.7 (-29.8 to -12.2) |
|              | Male   | 3550 (2680 to 4600) | 9 (6.7 to 11.7)  | -17.5 (-37.5 to 10.1)  | 1410 (1280 to 1560) | 3.4 (3.1 to 3.8) | -20.4 (-28 to -11.6)   | 32300 (29100 to 35900) | 82.9 (74.3 to 92.3) | -22.7 (-31.3 to -13)   |
|              | Female | 190 (135 to 252)    | 0.4 (0.3 to 0.6) | -1.1 (-26.7 to 32.6)   | 90 (68 to 105)      | 0.2 (0.1 to 0.2) | -6.2 (-17.7 to 7.5)    | 2070 (1540 to 2400)    | 5 (3.7 to 5.8)      | -6.7 (-19.5 to 7.9)    |
| Sri Lanka    | Both   | 318 (228 to 433)    | 1.2 (0.9 to 1.6) | -8.1 (-33.5 to 22.6)   | 180 (130 to 242)    | 0.7 (0.5 to 1)   | -20.8 (-41.6 to 4.3)   | 4530 (3190 to 6190)    | 17.1 (12.2 to 23.2) | -21 (-42.9 to 5.8)     |
|              | Male   | 261 (183 to 362)    | 2.2 (1.6 to 3.1) | -9 (-34.9 to 22.4)     | 143 (100 to 195)    | 1.3 (0.9 to 1.7) | -21.7 (-42.8 to 2.9)   | 3660 (2530 to 5090)    | 30.5 (21.3 to 42)   | -22.4 (-44.8 to 4.5)   |
|              | Female | 57 (41 to 78)       | 0.4 (0.3 to 0.5) | 1.7 (-27.1 to 36.2)    | 38 (27 to 51)       | 0.3 (0.2 to 0.4) | -10.6 (-35.7 to 19.1)  | 871 (620 to 1180)      | 6.1 (4.4 to 8.3)    | -10.6 (-36.6 to 20.1)  |
| Sudan        | Both   | 410 (270 to 553)    | 2.2 (1.5 to 2.9) | 1.2 (-16.8 to 24.7)    | 345 (240 to 462)    | 1.9 (1.4 to 2.5) | -4 (-21.1 to 17.5)     | 9570 (6340 to 13300)   | 46.5 (31.9 to 63.1) | -6.4 (-23.9 to 16.3)   |
|              | Male   | 327 (211 to 446)    | 3.2 (2.1 to 4.4) | 0.6 (-18 to 26.4)      | 279 (189 to 377)    | 2.9 (2 to 3.9)   | -4.6 (-22 to 19.1)     | 7540 (4880 to 10500)   | 69.5 (46.4 to 95.6) | -6.7 (-24.6 to 18.2)   |
|              | Female | 83 (54 to 118)      | 0.9 (0.6 to 1.2) | 4.7 (-17.8 to 33.6)    | 65 (45 to 92)       | 0.7 (0.5 to 1)   | -1.6 (-21.8 to 25.6)   | 2040 (1320 to 3010)    | 19.3 (12.9 to 27.4) | -3.8 (-25.4 to 25.7)   |

|                               |        |                     |                  |                       |                    |                  |                       |                        |                     |                        |
|-------------------------------|--------|---------------------|------------------|-----------------------|--------------------|------------------|-----------------------|------------------------|---------------------|------------------------|
| Suriname                      | Both   | 6 (5 to 8)          | 1 (0.8 to 1.3)   | 5.9 (-15.9 to 32.5)   | 5 (4 to 6)         | 0.9 (0.7 to 1.1) | 2.3 (-18.7 to 26.8)   | 138 (110 to 171)       | 21.8 (17.4 to 26.9) | 2.4 (-19 to 28.4)      |
|                               | Male   | 5 (4 to 7)          | 1.9 (1.5 to 2.3) | 6.1 (-17 to 34.2)     | 4 (4 to 6)         | 1.6 (1.3 to 2)   | 2.7 (-19 to 27.9)     | 119 (93 to 150)        | 39.8 (31.4 to 49.7) | 2.3 (-20.2 to 29.6)    |
|                               | Female | 1 (1 to 1)          | 0.3 (0.2 to 0.4) | 10.8 (-11.2 to 41.5)  | 1 (1 to 1)         | 0.2 (0.2 to 0.3) | 7 (-14 to 36.2)       | 19 (15 to 24)          | 5.8 (4.7 to 7.3)    | 7.5 (-13.8 to 38.5)    |
| Sweden                        | Both   | 232 (187 to 286)    | 1.2 (1 to 1.5)   | -4.1 (-22.8 to 19.4)  | 72 (66 to 80)      | 0.3 (0.3 to 0.4) | -7.4 (-14.8 to 1.7)   | 1500 (1370 to 1650)    | 8.1 (7.4 to 8.8)    | -9.7 (-17.6 to -0.7)   |
|                               | Male   | 204 (160 to 255)    | 2.2 (1.7 to 2.7) | -6 (-26.4 to 19.8)    | 58 (52 to 65)      | 0.6 (0.5 to 0.6) | -9.7 (-18.7 to 0.5)   | 1210 (1090 to 1340)    | 13.2 (11.8 to 14.6) | -11.4 (-20.8 to -0.4)  |
|                               | Female | 28 (22 to 35)       | 0.3 (0.2 to 0.4) | -1.7 (-22.7 to 25)    | 14 (12 to 16)      | 0.1 (0.1 to 0.1) | -6.4 (-16.2 to 5.1)   | 296 (261 to 336)       | 3.3 (2.9 to 3.8)    | -7.4 (-17.3 to 4.5)    |
| Switzerland                   | Both   | 289 (216 to 381)    | 1.8 (1.4 to 2.4) | -16.5 (-38.1 to 10.9) | 103 (92 to 114)    | 0.6 (0.5 to 0.7) | -17.3 (-25.8 to -8)   | 2300 (2050 to 2590)    | 14.9 (13.3 to 16.8) | -19.3 (-28.7 to -8.9)  |
|                               | Male   | 253 (188 to 335)    | 3.4 (2.5 to 4.4) | -18.7 (-40 to 7.2)    | 85 (75 to 96)      | 1.1 (1 to 1.2)   | -20.3 (-29.6 to -10)  | 1930 (1690 to 2180)    | 25.9 (22.7 to 29.2) | -21.6 (-32.2 to -11.2) |
|                               | Female | 36 (27 to 48)       | 0.4 (0.3 to 0.6) | -10.6 (-33.7 to 19.1) | 18 (15 to 21)      | 0.2 (0.2 to 0.2) | -11.8 (-23.8 to 2.7)  | 373 (317 to 444)       | 4.8 (4.1 to 5.7)    | -13 (-25.5 to 2)       |
| Syria                         | Both   | 148 (110 to 196)    | 1.2 (0.9 to 1.6) | -2.8 (-26.7 to 28)    | 101 (75 to 133)    | 0.9 (0.7 to 1.1) | -7.3 (-29.3 to 19.4)  | 2700 (1980 to 3590)    | 20.3 (15.1 to 26.9) | -5.5 (-29.6 to 24.8)   |
|                               | Male   | 125 (92 to 168)     | 1.9 (1.4 to 2.6) | -0.5 (-26.3 to 33)    | 86 (63 to 115)     | 1.4 (1.1 to 1.9) | -5 (-29.4 to 25.3)    | 2280 (1670 to 3060)    | 33.6 (24.8 to 45)   | -3.3 (-29 to 29.7)     |
|                               | Female | 23 (17 to 31)       | 0.4 (0.3 to 0.5) | -1.3 (-26 to 31)      | 15 (11 to 20)      | 0.3 (0.2 to 0.4) | -6.8 (-27.7 to 20)    | 419 (310 to 569)       | 6.5 (4.9 to 8.6)    | -3.7 (-28.1 to 29.3)   |
| Taiwan<br>(Province of China) | Both   | 798 (609 to 1050)   | 2 (1.5 to 2.7)   | 1.8 (-23 to 34.5)     | 276 (213 to 360)   | 0.7 (0.5 to 0.9) | -6.6 (-27.8 to 21.6)  | 6800 (5160 to 9020)    | 17.5 (13.3 to 23.1) | -5.6 (-28 to 26.2)     |
|                               | Male   | 757 (576 to 1010)   | 4 (3.1 to 5.4)   | 5 (-20.6 to 38.8)     | 258 (198 to 337)   | 1.4 (1.1 to 1.8) | -2.2 (-24.9 to 27)    | 6390 (4800 to 8520)    | 34.5 (26.2 to 45.8) | -2.9 (-26.2 to 29.6)   |
|                               | Female | 41 (30 to 56)       | 0.2 (0.1 to 0.3) | -0.7 (-25.2 to 31.7)  | 18 (14 to 24)      | 0.1 (0.1 to 0.1) | -6.5 (-28.2 to 20.8)  | 409 (309 to 554)       | 2.1 (1.6 to 2.8)    | -6.7 (-29.5 to 21.4)   |
| Tajikistan                    | Both   | 57 (44 to 79)       | 1.1 (0.8 to 1.4) | -26 (-43.3 to -4.5)   | 48 (37 to 66)      | 1 (0.8 to 1.3)   | -26.3 (-43 to -5.9)   | 1490 (1140 to 2080)    | 24.8 (19.2 to 33.5) | -28.9 (-46 to -7)      |
|                               | Male   | 37 (27 to 54)       | 1.5 (1.2 to 2.2) | -27.2 (-45.1 to -3.6) | 32 (24 to 47)      | 1.5 (1.1 to 2.1) | -26.6 (-44.3 to -3.3) | 938 (695 to 1370)      | 34.4 (26 to 51)     | -31 (-48.4 to -7.7)    |
|                               | Female | 20 (15 to 27)       | 0.7 (0.5 to 0.9) | -18.2 (-38.4 to 6.5)  | 16 (12 to 21)      | 0.6 (0.4 to 0.7) | -20 (-39 to 4)        | 550 (409 to 725)       | 16.1 (12.4 to 20.9) | -20.2 (-41.6 to 5.3)   |
| Thailand                      | Both   | 2070 (1520 to 2820) | 2 (1.5 to 2.7)   | 2.2 (-27.9 to 41)     | 1190 (870 to 1600) | 1.2 (0.9 to 1.6) | -9 (-34.7 to 24.1)    | 30200 (21700 to 41400) | 29.1 (21 to 39.6)   | -8.4 (-35.9 to 26.9)   |
|                               | Male   | 1910 (1380 to 2620) | 4 (2.9 to 5.5)   | 4 (-27.2 to 43.3)     | 1080 (789 to 1470) | 2.3 (1.7 to 3.2) | -7 (-33.8 to 27)      | 27700 (19800 to 38100) | 57.3 (41.1 to 78.3) | -6.7 (-35.2 to 28.9)   |

|                     |        |                     |                   |                       |                     |                  |                       |                        |                     |                       |
|---------------------|--------|---------------------|-------------------|-----------------------|---------------------|------------------|-----------------------|------------------------|---------------------|-----------------------|
|                     | Female | 161 (118 to 214)    | 0.3 (0.2 to 0.4)  | -16.1 (-41.1 to 15.9) | 110 (82 to 144)     | 0.2 (0.1 to 0.3) | -24.1 (-45.2 to 2.8)  | 2480 (1810 to 3320)    | 4.6 (3.3 to 6.1)    | -23.6 (-46.7 to 5.7)  |
| Timor-Leste         | Both   | 9 (6 to 13)         | 1.1 (0.8 to 1.5)  | 23.3 (-1.3 to 51.8)   | 8 (6 to 11)         | 1.1 (0.8 to 1.4) | 17.7 (-5.3 to 44)     | 204 (137 to 281)       | 24.3 (16.5 to 32.9) | 20.5 (-4.7 to 51.1)   |
|                     | Male   | 7 (5 to 11)         | 1.8 (1.2 to 2.6)  | 28.9 (0.5 to 63.5)    | 7 (4 to 9)          | 1.7 (1.1 to 2.4) | 23 (-3.4 to 54.4)     | 161 (99 to 230)        | 38.3 (24.2 to 54.7) | 25.2 (-2.6 to 62)     |
|                     | Female | 2 (1 to 2)          | 0.5 (0.3 to 0.6)  | 9.6 (-12.6 to 36)     | 2 (1 to 2)          | 0.4 (0.3 to 0.6) | 6 (-15.1 to 30)       | 44 (30 to 57)          | 10.3 (7.3 to 13.3)  | 7.8 (-14.7 to 37.7)   |
| Togo                | Both   | 53 (38 to 71)       | 1.4 (1 to 1.9)    | -5.5 (-22.9 to 20.1)  | 48 (35 to 64)       | 1.3 (1 to 1.8)   | -7.6 (-24.1 to 16)    | 1380 (994 to 1850)     | 33.7 (24.5 to 45.2) | -7.7 (-26.1 to 19)    |
|                     | Male   | 48 (34 to 65)       | 3 (2.3 to 4)      | -4.9 (-22.6 to 20.6)  | 43 (31 to 59)       | 3 (2.2 to 3.9)   | -6.3 (-22.7 to 17.4)  | 1250 (879 to 1690)     | 70.5 (51.1 to 94.9) | -7.9 (-26.1 to 19.2)  |
|                     | Female | 5 (4 to 7)          | 0.2 (0.2 to 0.3)  | -3.3 (-25 to 25)      | 5 (3 to 6)          | 0.2 (0.2 to 0.3) | -5.1 (-26 to 20.9)    | 130 (94 to 177)        | 5.7 (4.2 to 7.7)    | -6.8 (-28.4 to 24.2)  |
| Tokelau             | Both   | 0 (0 to 0)          | 0.8 (0.6 to 1)    | -3.1 (-19.4 to 15.9)  | 0 (0 to 0)          | 0.6 (0.5 to 0.8) | -8 (-22.6 to 9.6)     | 0 (0 to 0)             | 14.3 (11.1 to 18.2) | -10.4 (-26.2 to 6.7)  |
|                     | Male   | 0 (0 to 0)          | 1.1 (0.9 to 1.4)  | -6.3 (-23.6 to 15.8)  | 0 (0 to 0)          | 0.9 (0.7 to 1.2) | -11.9 (-27.4 to 8.3)  | 0 (0 to 0)             | 19.2 (14.8 to 24.3) | -12.2 (-30 to 8.8)    |
|                     | Female | 0 (0 to 0)          | 0.5 (0.3 to 0.6)  | -5.8 (-28.8 to 22.9)  | 0 (0 to 0)          | 0.4 (0.3 to 0.5) | -11.1 (-31.8 to 14.6) | 0 (0 to 0)             | 9.7 (6.9 to 13.1)   | -11.8 (-33.9 to 16.5) |
| Tonga               | Both   | 1 (0 to 1)          | 0.8 (0.6 to 1)    | -3.4 (-19.5 to 16.2)  | 1 (0 to 1)          | 0.7 (0.5 to 0.8) | -6.6 (-21.3 to 11.8)  | 11 (9 to 14)           | 14.5 (11.2 to 18.2) | -6.8 (-22.9 to 12.6)  |
|                     | Male   | 0 (0 to 1)          | 1.4 (1.1 to 1.8)  | -3.4 (-19.4 to 17.3)  | 0 (0 to 1)          | 1.2 (0.9 to 1.6) | -6.6 (-21.8 to 13)    | 9 (7 to 12)            | 25 (19.1 to 32.1)   | -6.8 (-23 to 13.2)    |
|                     | Female | 0 (0 to 0)          | 0.3 (0.2 to 0.3)  | 0.5 (-23.7 to 30.9)   | 0 (0 to 0)          | 0.2 (0.2 to 0.3) | -2.4 (-24.9 to 26.3)  | 2 (2 to 3)             | 5.6 (4.1 to 7.4)    | -2.9 (-27.1 to 27.5)  |
| Trinidad and Tobago | Both   | 23 (17 to 30)       | 1.2 (0.9 to 1.6)  | -6.4 (-32 to 25.2)    | 18 (13 to 23)       | 1 (0.7 to 1.3)   | -9 (-33 to 19.9)      | 436 (321 to 576)       | 23.5 (17.4 to 30.9) | -9.1 (-34.1 to 21.7)  |
|                     | Male   | 21 (15 to 28)       | 2.4 (1.7 to 3.1)  | -7.2 (-32.7 to 24)    | 16 (12 to 21)       | 1.9 (1.4 to 2.5) | -9.6 (-33.8 to 18.9)  | 408 (299 to 540)       | 45.2 (33.3 to 59.6) | -9.8 (-34.9 to 20.8)  |
|                     | Female | 2 (1 to 2)          | 0.2 (0.1 to 0.2)  | 1.9 (-23.8 to 37.1)   | 1 (1 to 2)          | 0.1 (0.1 to 0.2) | -1 (-25.7 to 31.5)    | 28 (21 to 38)          | 2.9 (2.2 to 4)      | -1.2 (-27.3 to 32.4)  |
| Tunisia             | Both   | 509 (361 to 710)    | 3.9 (2.8 to 5.5)  | 6.2 (-19.9 to 45.2)   | 303 (216 to 420)    | 2.4 (1.7 to 3.3) | -7.5 (-29.9 to 24.3)  | 7810 (5500 to 10900)   | 59.3 (41.9 to 82.4) | -6.7 (-29.9 to 29.1)  |
|                     | Male   | 474 (332 to 666)    | 7.5 (5.3 to 10.6) | 7 (-20.1 to 46.3)     | 284 (201 to 396)    | 4.7 (3.3 to 6.6) | -6.4 (-29.2 to 26)    | 7290 (5100 to 10200)   | 113.2 (79.5 to 158) | -6 (-30.5 to 30.4)    |
|                     | Female | 35 (25 to 47)       | 0.5 (0.4 to 0.7)  | 4.4 (-23.5 to 42.4)   | 19 (14 to 26)       | 0.3 (0.2 to 0.4) | -9.6 (-33.2 to 21.1)  | 520 (371 to 703)       | 7.8 (5.6 to 10.5)   | -8.9 (-33.5 to 24.8)  |
| Turkey              | Both   | 2380 (1840 to 3010) | 2.7 (2.1 to 3.4)  | -11.2 (-31.7 to 15.7) | 1440 (1130 to 1800) | 1.6 (1.3 to 2.1) | -21.2 (-38.3 to 1.3)  | 35500 (27400 to 44900) | 39.2 (30.3 to 49.3) | -22.8 (-40.5 to 1)    |

|                      |        |                        |                   |                        |                        |                  |                       |                           |                      |                        |
|----------------------|--------|------------------------|-------------------|------------------------|------------------------|------------------|-----------------------|---------------------------|----------------------|------------------------|
|                      | Male   | 2110<br>(1620 to 2680) | 5 (3.9 to 6.4)    | -12.1 (-33.3 to 15.3)  | 1270 (985 to 1610)     | 3.1 (2.5 to 4)   | -21.8 (-39.8 to 1.2)  | 31500<br>(24000 to 40200) | 73.1 (56.1 to 92.1)  | -23.4 (-41.5 to 1.1)   |
|                      | Female | 279 (215 to 361)       | 0.6 (0.5 to 0.8)  | -5.1 (-27.8 to 27)     | 167 (131 to 215)       | 0.4 (0.3 to 0.5) | -16.3 (-35.8 to 9.5)  | 4050 (3150 to 5210)       | 8.6 (6.7 to 11.1)    | -17.8 (-37.7 to 10.2)  |
| Turkmenistan         | Both   | 51 (40 to 65)          | 1.2 (0.9 to 1.5)  | -3.6 (-23.9 to 22.2)   | 39 (31 to 49)          | 1 (0.8 to 1.2)   | -8.8 (-28.1 to 15)    | 1170 (910 to 1500)        | 26.3 (20.7 to 33.6)  | -8.8 (-28.8 to 15.3)   |
|                      | Male   | 36 (28 to 46)          | 1.9 (1.5 to 2.4)  | 5.8 (-17.2 to 34.5)    | 28 (22 to 36)          | 1.6 (1.2 to 2)   | 0.4 (-20.7 to 27)     | 853 (666 to 1090)         | 42 (32.9 to 53.2)    | 0 (-22.4 to 28.1)      |
|                      | Female | 14 (11 to 20)          | 0.6 (0.5 to 0.8)  | -21.4 (-39.6 to 5.3)   | 11 (8 to 14)           | 0.5 (0.4 to 0.6) | -26.4 (-43.3 to -2.8) | 318 (241 to 435)          | 13.4 (10.2 to 18.1)  | -26.5 (-44.1 to -2.7)  |
| Tuvalu               | Both   | 0 (0 to 0)             | 1.1 (0.8 to 1.5)  | -2.4 (-19.7 to 20.4)   | 0 (0 to 0)             | 1 (0.7 to 1.3)   | -5.3 (-21.3 to 16.2)  | 2 (2 to 3)                | 22.7 (16.3 to 30.7)  | -5.6 (-23.2 to 17.3)   |
|                      | Male   | 0 (0 to 0)             | 1.9 (1.3 to 2.5)  | -2.4 (-21.8 to 22.3)   | 0 (0 to 0)             | 1.7 (1.2 to 2.2) | -5.4 (-23.7 to 17.9)  | 2 (1 to 2)                | 36.5 (25 to 49.7)    | -5.5 (-25.1 to 18.8)   |
|                      | Female | 0 (0 to 0)             | 0.5 (0.3 to 0.6)  | -7.6 (-30.1 to 22)     | 0 (0 to 0)             | 0.4 (0.3 to 0.5) | -10.1 (-31.7 to 17.7) | 1 (0 to 1)                | 10.6 (7.5 to 14.8)   | -10.9 (-32.9 to 18.6)  |
| Uganda               | Both   | 230 (178 to 290)       | 1.5 (1.2 to 1.9)  | -4.9 (-23.5 to 16.5)   | 209 (162 to 262)       | 1.4 (1.1 to 1.8) | -6.4 (-24.2 to 14.2)  | 6330 (4790 to 8070)       | 38.5 (29.8 to 48.7)  | -6.8 (-25.6 to 16.4)   |
|                      | Male   | 175 (135 to 228)       | 2.6 (2.1 to 3.4)  | -6 (-25.1 to 16.9)     | 159 (123 to 206)       | 2.5 (2 to 3.2)   | -7.1 (-25.6 to 14.4)  | 4830 (3680 to 6280)       | 65.6 (51 to 85)      | -8 (-27.6 to 16.7)     |
|                      | Female | 55 (41 to 71)          | 0.7 (0.5 to 0.8)  | 1.5 (-21.2 to 31.3)    | 50 (37 to 63)          | 0.6 (0.5 to 0.8) | -0.6 (-22.1 to 27.2)  | 1500 (1100 to 1960)       | 16.4 (12.2 to 21)    | -0.5 (-23.7 to 30.8)   |
| Ukraine              | Both   | 2890<br>(2260 to 3660) | 4.1 (3.2 to 5.2)  | 16 (-10.6 to 49.3)     | 1750<br>(1360 to 2170) | 2.4 (1.9 to 3)   | 10.3 (-14.5 to 37.3)  | 51200<br>(39800 to 63900) | 73.2 (56.9 to 91.2)  | 14.6 (-11.1 to 44.5)   |
|                      | Male   | 2760<br>(2140 to 3540) | 9.3 (7.2 to 11.9) | 13.8 (-12.9 to 46.2)   | 1690<br>(1300 to 2120) | 5.7 (4.4 to 7.1) | 8.1 (-16.7 to 35.2)   | 49600<br>(38200 to 62600) | 167.2 (128.8 to 210) | 12.6 (-13.1 to 42.2)   |
|                      | Female | 127 (97 to 175)        | 0.3 (0.2 to 0.4)  | 12.6 (-15 to 47.3)     | 59 (45 to 80)          | 0.1 (0.1 to 0.2) | 3.7 (-19.9 to 33.5)   | 1620 (1250 to 2190)       | 4.3 (3.3 to 5.8)     | 10.4 (-15.8 to 43.8)   |
| United Arab Emirates | Both   | 228 (148 to 346)       | 4 (2.8 to 5.6)    | -11.1 (-29.7 to 13.2)  | 145 (94 to 219)        | 3.1 (2.2 to 4.2) | -18.5 (-34.4 to 3.4)  | 5470 (3460 to 8480)       | 76.4 (52.8 to 108)   | -14.4 (-33 to 10.4)    |
|                      | Male   | 213 (134 to 327)       | 5.2 (3.5 to 7.2)  | -8.4 (-28.4 to 19.2)   | 136 (87 to 207)        | 3.9 (2.8 to 5.5) | -14.9 (-32.6 to 9.5)  | 5110 (3170 to 8090)       | 96.5 (65.8 to 138.4) | -12.9 (-32.8 to 13.7)  |
|                      | Female | 15 (10 to 22)          | 1.1 (0.8 to 1.6)  | -44.5 (-57.9 to -25.9) | 9 (6 to 13)            | 0.8 (0.5 to 1.1) | -52 (-63.3 to -36.9)  | 361 (242 to 521)          | 21.1 (14.3 to 29.2)  | -43.1 (-56.7 to -24.5) |
| United Kingdom       | Both   | 3180<br>(2610 to 3850) | 2.7 (2.2 to 3.3)  | 0.2 (-18 to 22)        | 962 (900 to 1000)      | 0.8 (0.7 to 0.8) | -4.6 (-7.2 to -2)     | 21200<br>(20000 to 22200) | 18.6 (17.7 to 19.5)  | -6.8 (-9.7 to -3.8)    |
|                      | Male   | 2330<br>(1820 to 2960) | 4.2 (3.3 to 5.3)  | -1.1 (-22.8 to 25.5)   | 774 (733 to 805)       | 1.3 (1.3 to 1.4) | -6.3 (-9.3 to -3.3)   | 16900<br>(16100 to 17700) | 31 (29.6 to 32.5)    | -8.3 (-11.7 to -4.9)   |

|                          |        |                        |                  |                        |                     |                  |                        |                           |                        |                        |
|--------------------------|--------|------------------------|------------------|------------------------|---------------------|------------------|------------------------|---------------------------|------------------------|------------------------|
|                          | Female | 857 (646 to 1070)      | 1.4 (1.1 to 1.8) | 0.9 (-20.5 to 26.6)    | 188 (146 to 203)    | 0.3 (0.2 to 0.3) | -3.4 (-7.3 to 0.4)     | 4300 (3510 to 4710)       | 7.4 (6.3 to 8)         | -3.6 (-8.4 to 1.3)     |
| Tanzania                 | Both   | 351 (266 to 493)       | 1.4 (1 to 1.9)   | -3.6 (-22.6 to 19.1)   | 322 (245 to 451)    | 1.3 (1 to 1.8)   | -5.1 (-23 to 16.6)     | 9390 (7010 to 13300)      | 34 (25.7 to 47.7)      | -6 (-25.6 to 17.6)     |
|                          | Male   | 277 (202 to 411)       | 2.3 (1.7 to 3.3) | -5.1 (-24.3 to 18.5)   | 255 (189 to 377)    | 2.2 (1.6 to 3.1) | -6.6 (-25.1 to 15.9)   | 7410 (5330 to 11000)      | 55.8 (40.7 to 82.6)    | -7 (-26.8 to 18.1)     |
|                          | Female | 74 (57 to 94)          | 0.5 (0.4 to 0.7) | -1.4 (-23.9 to 26.4)   | 67 (52 to 85)       | 0.5 (0.4 to 0.6) | -3.1 (-24.6 to 23.3)   | 1980 (1490 to 2600)       | 13.5 (10.3 to 17.4)    | -3.5 (-26.7 to 25.4)   |
| Virgin Islands           | Both   | 5 (4 to 7)             | 2.9 (2.4 to 3.5) | -4.1 (-20.9 to 14.2)   | 4 (3 to 5)          | 2.1 (1.7 to 2.4) | -4.4 (-19.7 to 12.8)   | 94 (76 to 112)            | 51.6 (41.6 to 61.7)    | -3.4 (-20.9 to 15.5)   |
|                          | Male   | 5 (4 to 6)             | 6.1 (4.9 to 7.3) | -1 (-19.1 to 18.7)     | 4 (3 to 4)          | 4.3 (3.5 to 5.1) | -1.3 (-17.8 to 17.3)   | 88 (71 to 105)            | 106.1 (84.9 to 127.8)  | -0.5 (-18.5 to 19.6)   |
|                          | Female | 0 (0 to 0)             | 0.4 (0.3 to 0.5) | -8.5 (-25.6 to 11.9)   | 0 (0 to 0)          | 0.3 (0.2 to 0.3) | -8 (-24.6 to 11.3)     | 6 (5 to 8)                | 6.1 (4.9 to 7.6)       | -8.6 (-25.8 to 12.2)   |
| United States of America | Both   | 16200 (13500 to 19500) | 3 (2.5 to 3.6)   | -5.3 (-21.1 to 13.9)   | 4930 (4700 to 5150) | 0.9 (0.8 to 0.9) | -4.9 (-7.8 to -1.8)    | 118000 (112000 to 123000) | 22.1 (21.1 to 23.2)    | -6.8 (-10 to -3.3)     |
|                          | Male   | 13600 (11000 to 16700) | 5.3 (4.3 to 6.6) | -5.4 (-23.2 to 15.9)   | 3950 (3760 to 4140) | 1.5 (1.5 to 1.6) | -5.1 (-8.6 to -1.5)    | 94700 (89900 to 99600)    | 37.7 (35.8 to 39.6)    | -6.8 (-10.3 to -2.6)   |
|                          | Female | 2650 (2170 to 3270)    | 0.9 (0.8 to 1.1) | -8.3 (-24.6 to 12.1)   | 982 (896 to 1070)   | 0.3 (0.3 to 0.4) | -8.5 (-12.4 to -3.8)   | 23100 (21500 to 25200)    | 8.3 (7.8 to 9.1)       | -9.4 (-13.5 to -4.2)   |
| Uruguay                  | Both   | 221 (170 to 283)       | 4.4 (3.4 to 5.7) | -1.6 (-25.8 to 26.5)   | 137 (124 to 151)    | 2.6 (2.4 to 2.9) | -6.8 (-16.5 to 3.8)    | 3260 (2920 to 3610)       | 67.5 (60.2 to 74.9)    | -7.6 (-18 to 5.3)      |
|                          | Male   | 200 (152 to 256)       | 9 (6.9 to 11.6)  | -2.4 (-26.6 to 26.4)   | 123 (110 to 137)    | 5.5 (4.9 to 6.1) | -7.5 (-17.8 to 4)      | 2970 (2630 to 3310)       | 136.6 (121.3 to 152.6) | -8.1 (-19 to 5.1)      |
|                          | Female | 21 (16 to 28)          | 0.7 (0.5 to 1)   | 1.6 (-22.5 to 32.4)    | 14 (12 to 17)       | 0.4 (0.4 to 0.5) | -3.4 (-16.5 to 11.9)   | 292 (240 to 343)          | 10.6 (8.7 to 12.5)     | -5.6 (-19.3 to 11.2)   |
| Uzbekistan               | Both   | 497 (414 to 594)       | 2.1 (1.8 to 2.5) | -28 (-40.4 to -14.3)   | 367 (306 to 436)    | 1.7 (1.5 to 2)   | -31.6 (-43.4 to -18.9) | 11600 (9630 to 13900)     | 45.1 (37.8 to 53.4)    | -31.3 (-43.7 to -18)   |
|                          | Male   | 305 (248 to 368)       | 3 (2.5 to 3.5)   | -26.8 (-39.3 to -11.2) | 233 (191 to 281)    | 2.5 (2.1 to 3)   | -30.2 (-41.9 to -16.6) | 7130 (5820 to 8600)       | 62.9 (52.2 to 75.1)    | -29.7 (-42.1 to -14.4) |
|                          | Female | 192 (155 to 237)       | 1.5 (1.2 to 1.8) | -29.7 (-44 to -5.6)    | 134 (109 to 163)    | 1.1 (0.9 to 1.4) | -33.9 (-46.5 to -11.9) | 4470 (3600 to 5460)       | 31.3 (25.6 to 38)      | -33.4 (-46.7 to -10.7) |
| Vanuatu                  | Both   | 2 (1 to 2)             | 1.1 (0.7 to 1.5) | 1 (-15.9 to 21.6)      | 2 (1 to 2)          | 1.1 (0.7 to 1.4) | -0.8 (-17 to 18.7)     | 43 (29 to 60)             | 24.1 (16.5 to 33.2)    | -0.5 (-19.1 to 20.9)   |
|                          | Male   | 1 (1 to 2)             | 1.7 (1.1 to 2.3) | 1.2 (-17.5 to 22.6)    | 1 (1 to 2)          | 1.7 (1.1 to 2.2) | -0.5 (-18.5 to 21.1)   | 35 (22 to 49)             | 37.2 (24.3 to 51.5)    | -0.6 (-20.4 to 22)     |
|                          | Female | 0 (0 to 0)             | 0.4 (0.3 to 0.6) | 0.7 (-22 to 29.6)      | 0 (0 to 0)          | 0.4 (0.2 to 0.5) | -0.8 (-22.4 to 27.2)   | 9 (5 to 13)               | 9.7 (6.1 to 14.1)      | -0.9 (-24 to 29.6)     |

|           |        |                     |                  |                       |                     |                  |                       |                        |                       |                       |
|-----------|--------|---------------------|------------------|-----------------------|---------------------|------------------|-----------------------|------------------------|-----------------------|-----------------------|
| Venezuela | Both   | 905 (673 to 1200)   | 3 (2.3 to 4)     | -1.4 (-27 to 30.7)    | 639 (480 to 837)    | 2.2 (1.7 to 2.9) | -3.3 (-28 to 27.3)    | 16000 (11600 to 21300) | 52.9 (38.8 to 70.1)   | -4.1 (-30 to 28.1)    |
|           | Male   | 784 (577 to 1040)   | 5.6 (4.2 to 7.5) | -2.7 (-28.4 to 29.7)  | 552 (411 to 728)    | 4.1 (3.1 to 5.4) | -4.7 (-29 to 25.7)    | 13900 (10100 to 18700) | 97.5 (71.7 to 129.7)  | -5.3 (-31.3 to 27.4)  |
|           | Female | 120 (90 to 160)     | 0.8 (0.6 to 1)   | 2.1 (-23.6 to 34.5)   | 87 (66 to 115)      | 0.6 (0.4 to 0.7) | -0.3 (-24.6 to 29.5)  | 2020 (1500 to 2710)    | 12.9 (9.6 to 17.2)    | -0.1 (-26 to 31.2)    |
| Vietnam   | Both   | 3050 (2310 to 3890) | 3.1 (2.3 to 3.9) | 17.8 (-5.8 to 45.7)   | 1840 (1420 to 2320) | 1.9 (1.5 to 2.4) | 2.7 (-16.2 to 24.9)   | 52800 (39800 to 68000) | 51 (38.9 to 64.9)     | 2.1 (-19 to 27.1)     |
|           | Male   | 2860 (2140 to 3680) | 6.5 (5 to 8.2)   | 17.4 (-6.3 to 44.8)   | 1700 (1300 to 2170) | 4.2 (3.3 to 5.2) | 3.1 (-16 to 25.4)     | 49200 (36900 to 63900) | 106.2 (80.9 to 135.9) | 1.6 (-19.6 to 26)     |
|           | Female | 197 (144 to 260)    | 0.4 (0.3 to 0.5) | 5.1 (-20.1 to 37.5)   | 137 (101 to 177)    | 0.3 (0.2 to 0.3) | -6.1 (-27.9 to 21.8)  | 3580 (2600 to 4770)    | 6.5 (4.8 to 8.6)      | -6.7 (-29 to 22.2)    |
| Yemen     | Both   | 376 (259 to 518)    | 2.7 (1.9 to 3.7) | 4.8 (-16.3 to 30.4)   | 326 (225 to 444)    | 2.5 (1.8 to 3.4) | 2.9 (-17.4 to 26.9)   | 9410 (6320 to 13100)   | 62.7 (43 to 86.1)     | 2.6 (-18.5 to 28.2)   |
|           | Male   | 299 (197 to 423)    | 4.5 (3 to 6.2)   | 5.3 (-17.6 to 31.6)   | 261 (173 to 367)    | 4.1 (2.8 to 5.7) | 3.1 (-18.8 to 28.1)   | 7400 (4750 to 10600)   | 101.5 (66.6 to 143.7) | 3.3 (-20 to 31.1)     |
|           | Female | 77 (53 to 109)      | 1.1 (0.7 to 1.5) | 7.5 (-16.9 to 39)     | 65 (45 to 91)       | 0.9 (0.7 to 1.3) | 5.2 (-18.2 to 34.4)   | 2010 (1320 to 2850)    | 24.9 (17.1 to 35.2)   | 5.2 (-19.1 to 38)     |
| Zambia    | Both   | 125 (92 to 169)     | 1.7 (1.3 to 2.3) | -8.7 (-29 to 16.3)    | 112 (83 to 149)     | 1.6 (1.2 to 2.1) | -12.9 (-31.4 to 10.4) | 3510 (2550 to 4820)    | 43.8 (32.1 to 58.8)   | -13 (-33.5 to 13.2)   |
|           | Male   | 101 (73 to 140)     | 2.9 (2.1 to 3.9) | -8 (-29.6 to 18.1)    | 91 (66 to 125)      | 2.7 (2 to 3.6)   | -11.9 (-32.1 to 14.2) | 2840 (2030 to 3980)    | 73 (52.8 to 100.5)    | -12.8 (-34.5 to 16.4) |
|           | Female | 24 (17 to 33)       | 0.6 (0.5 to 0.9) | -10.7 (-32.3 to 19.6) | 21 (15 to 29)       | 0.6 (0.4 to 0.8) | -14.2 (-34.7 to 14.4) | 673 (468 to 939)       | 15.9 (11.3 to 22.1)   | -15.9 (-37.5 to 14.1) |
| Zimbabwe  | Both   | 182 (146 to 227)    | 2.4 (2 to 2.9)   | -4.2 (-21.1 to 16.1)  | 165 (133 to 206)    | 2.3 (1.8 to 2.7) | -6.7 (-23.5 to 12.4)  | 5130 (3990 to 6540)    | 63 (50.2 to 78.9)     | -7.2 (-26.2 to 14.8)  |
|           | Male   | 145 (115 to 181)    | 4.5 (3.7 to 5.5) | 0.1 (-19.6 to 22.9)   | 132 (106 to 163)    | 4.3 (3.5 to 5.2) | -4 (-22.2 to 17.2)    | 4130 (3240 to 5280)    | 118.1 (94.2 to 147)   | -5.3 (-25.1 to 18.5)  |
|           | Female | 37 (26 to 51)       | 0.9 (0.6 to 1.2) | -12.7 (-34.8 to 17.9) | 33 (23 to 45)       | 0.8 (0.6 to 1.1) | -9.9 (-31.7 to 21)    | 996 (688 to 1380)      | 21.6 (15.1 to 29.5)   | -10.6 (-34.2 to 23.7) |

**Table S3. Years lived with disability (YLDs) and years of life lost (YLLs) in 2019 (counts and age-standardised rates), and percent change in age-standardised rates between 2010 and 2019, at global, regional, national levels, and Socio-demographic Index (SDI) quintiles, by sex and for both sexes combined, for tracheal, bronchus, and lung (TBL), and larynx cancer.**

95% UIs given in parentheses.

| Location | Cause         | Sex    | YLDs                         |                                           |                                                               | YLLs                               |                                           |                                                               |
|----------|---------------|--------|------------------------------|-------------------------------------------|---------------------------------------------------------------|------------------------------------|-------------------------------------------|---------------------------------------------------------------|
|          |               |        | Number in 2019               | Age-standardised rate per 100,000 in 2019 | Percent change in age-standardised rate from 2010 to 2019 (%) | Number in 2019                     | Age-standardised rate per 100,000 in 2019 | Percent change in age-standardised rate from 2010 to 2019 (%) |
| Global   | TBL cancer    | Both   | 544000<br>(396000 to 700000) | 6.6 (4.8 to 8.5)                          | -4.2 (-12.2 to 3.6)                                           | 45300000<br>(41900000 to 48800000) | 545 (503.5 to 587.2)                      | -7.3 (-14.6 to 0.5)                                           |
|          |               | Male   | 365000<br>(266000 to 469000) | 9.6 (7 to 12.3)                           | -6.8 (-16.1 to 3.1)                                           | 31200000<br>(28300000 to 34300000) | 793.3 (718.8 to 869)                      | -10 (-18.7 to -0.3)                                           |
|          |               | Female | 179000<br>(129000 to 232000) | 4.1 (2.9 to 5.3)                          | 0.9 (-8.7 to 10.6)                                            | 14100000<br>(12800000 to 15500000) | 323.5 (294.1 to 356.6)                    | -1.3 (-10.1 to 7.8)                                           |
|          | Larynx cancer | Both   | 117000<br>(86200 to 152000)  | 1.4 (1 to 1.8)                            | -1.4 (-8.1 to 6.1)                                            | 3150000<br>(2930000 to 3400000)    | 37.4 (34.8 to 40.4)                       | -9.6 (-15.9 to -3.1)                                          |
|          |               | Male   | 98300 (72700 to 128000)      | 2.5 (1.8 to 3.2)                          | -1.8 (-9.2 to 6.6)                                            | 2700000<br>(2500000 to 2940000)    | 66.9 (61.9 to 72.8)                       | -10.3 (-17.4 to -3.3)                                         |
|          |               | Female | 18500 (13100 to 24600)       | 0.4 (0.3 to 0.6)                          | 0 (-6.8 to 7.6)                                               | 445000 (404000 to 493000)          | 10.3 (9.3 to 11.4)                        | -5.4 (-13.7 to 4.1)                                           |
| High SDI | TBL cancer    | Both   | 178000<br>(130000 to 227000) | 9.6 (6.9 to 12.2)                         | -8.9 (-16.2 to -0.7)                                          | 11200000<br>(10600000 to 11500000) | 626.4 (598.5 to 647)                      | -11 (-13.3 to -8.8)                                           |
|          |               | Male   | 108000<br>(78100 to 138000)  | 12.6 (9.1 to 16.1)                        | -12.8 (-21.1 to -3.3)                                         | 6920000<br>(6630000 to 7140000)    | 823.2 (790 to 849)                        | -14.8 (-16.8 to -12.6)                                        |
|          |               | Female | 69900 (51000 to 89900)       | 7.1 (5.2 to 9.2)                          | -3.9 (-14 to 7)                                               | 4240000<br>(3950000 to 4430000)    | 454.8 (429.7 to 473.5)                    | -5.6 (-8.7 to -2.4)                                           |
|          | Larynx cancer | Both   | 27300 (19500 to 35700)       | 1.6 (1.1 to 2.1)                          | -5.3 (-14.1 to 4.9)                                           | 315000 (300000 to 329000)          | 18.5 (17.7 to 19.4)                       | -10.7 (-13.8 to -7.1)                                         |
|          |               | Male   | 22800 (16300 to 29800)       | 2.8 (2 to 3.6)                            | -6.8 (-16.6 to 4.4)                                           | 267000 (255000 to 280000)          | 32.8 (31.2 to 34.4)                       | -12.2 (-15.8 to -8.3)                                         |

|                 |               |        |                           |                    |                     |                                 |                        |                        |
|-----------------|---------------|--------|---------------------------|--------------------|---------------------|---------------------------------|------------------------|------------------------|
|                 |               | Female | 4510 (3210 to 6180)       | 0.5 (0.4 to 0.7)   | -3.4 (-12.2 to 6.6) | 47600 (43600 to 51700)          | 5.4 (5 to 5.9)         | -8.2 (-12.2 to -3.5)   |
| High-middle SDI | TBL cancer    | Both   | 161000 (116000 to 207000) | 7.8 (5.6 to 10.1)  | -3.4 (-14 to 7.5)   | 13800000 (12600000 to 15100000) | 672.9 (612.4 to 736.2) | -9.7 (-18.1 to -0.2)   |
|                 |               | Male   | 114000 (81000 to 148000)  | 12.3 (8.7 to 15.9) | -7.7 (-19.5 to 5.4) | 10000000 (8860000 to 11200000)  | 1052 (931.6 to 1175.3) | -13.4 (-23.5 to -1.9)  |
|                 |               | Female | 46300 (32700 to 60600)    | 4.2 (2.9 to 5.4)   | 6 (-8.6 to 23.2)    | 3830000 (3380000 to 4360000)    | 350.9 (310.4 to 399.9) | -0.7 (-13.5 to 14.7)   |
|                 | Larynx cancer | Both   | 32900 (23700 to 43300)    | 1.6 (1.2 to 2.1)   | -5.4 (-13.8 to 3.5) | 748000 (692000 to 801000)       | 36.4 (33.7 to 39)      | -18.7 (-24.7 to -12.9) |
|                 |               | Male   | 28800 (20600 to 37900)    | 3 (2.2 to 4)       | -6.9 (-15.8 to 2.9) | 674000 (620000 to 726000)       | 69.9 (64.5 to 75.3)    | -19.9 (-26.4 to -13.9) |
|                 |               | Female | 4060 (2880 to 5420)       | 0.4 (0.3 to 0.5)   | -1.2 (-10 to 9.2)   | 73700 (67100 to 81500)          | 6.9 (6.3 to 7.6)       | -13.4 (-21.4 to -4.3)  |
| Middle SDI      | TBL cancer    | Both   | 155000 (110000 to 202000) | 6.2 (4.4 to 8.1)   | 3.4 (-10.3 to 19.1) | 14700000 (12900000 to 16700000) | 573.2 (501.1 to 647.8) | -3.2 (-15.7 to 10.5)   |
|                 |               | Male   | 108000 (75900 to 142000)  | 9.1 (6.4 to 12)    | 1.7 (-14.9 to 21.1) | 10300000 (8650000 to 12100000)  | 835.3 (704.2 to 975.8) | -4.7 (-19.8 to 12.3)   |
|                 |               | Female | 47600 (32700 to 63900)    | 3.7 (2.5 to 4.9)   | 9.1 (-7.9 to 26.8)  | 4420000 (3760000 to 5160000)    | 333.1 (284 to 387.6)   | 2.3 (-13.6 to 19.3)    |
|                 | Larynx cancer | Both   | 31600 (22900 to 41900)    | 1.2 (0.9 to 1.6)   | 8.3 (-2.8 to 21.3)  | 880000 (798000 to 967000)       | 33.4 (30.3 to 36.7)    | -9.1 (-17.3 to -0.6)   |
|                 |               | Male   | 26200 (19000 to 34800)    | 2.1 (1.5 to 2.8)   | 10.3 (-2.5 to 25.8) | 750000 (673000 to 832000)       | 59 (53.1 to 65.4)      | -7.7 (-17.3 to 2)      |
|                 |               | Female | 5420 (3780 to 7310)       | 0.4 (0.3 to 0.6)   | 3.2 (-7.7 to 14.5)  | 129000 (116000 to 145000)       | 9.7 (8.7 to 10.9)      | -11.4 (-21.3 to -0.7)  |
| Low-middle SDI  | TBL cancer    | Both   | 39600 (28400 to 51400)    | 2.9 (2.1 to 3.7)   | 4.9 (-6 to 15)      | 4360000 (3940000 to 4780000)    | 305.3 (276.2 to 334.6) | 2.8 (-7.5 to 12.5)     |
|                 |               | Male   | 27400 (19700 to 35600)    | 4.2 (3 to 5.4)     | 1.9 (-11.3 to 16.3) | 3050000 (2760000 to 3370000)    | 443.8 (401.4 to 489)   | -0.5 (-12.1 to 11.4)   |
|                 |               | Female | 12200 (8440 to 16300)     | 1.7 (1.2 to 2.3)   | 15 (0.2 to 29.2)    | 1310000 (1130000 to 1500000)    | 176.8 (153 to 202.7)   | 14 (-0.1 to 28.8)      |
|                 | Larynx cancer | Both   | 18800 (13700 to 24800)    | 1.3 (1 to 1.7)     | 2.5 (-8.4 to 15.3)  | 881000 (782000 to 1000000)      | 60 (53.4 to 68)        | -5.4 (-16.2 to 7.4)    |



|                |               |        |                        |                     |                       |                              |                           |                        |
|----------------|---------------|--------|------------------------|---------------------|-----------------------|------------------------------|---------------------------|------------------------|
|                |               | Male   | 15500 (11400 to 20600) | 2.2 (1.6 to 3)      | 2.8 (-10 to 17.6)     | 743000 (648000 to 853000)    | 104.6 (91.3 to 119.7)     | -5.3 (-17.8 to 8.9)    |
|                |               | Female | 3310 (2320 to 4530)    | 0.4 (0.3 to 0.6)    | 7 (-5.9 to 22.7)      | 138000 (117000 to 162000)    | 18.1 (15.4 to 21.2)       | 0.3 (-13.6 to 17.1)    |
| Low SDI        | TBL cancer    | Both   | 10400 (7320 to 14000)  | 2 (1.4 to 2.7)      | 3.5 (-7.9 to 16.5)    | 1210000 (1030000 to 1440000) | 217.9 (187.3 to 257.5)    | 2.7 (-7.8 to 14)       |
|                |               | Male   | 7740 (5260 to 10600)   | 3.1 (2.1 to 4.1)    | -0.5 (-13.5 to 14.6)  | 902000 (748000 to 1120000)   | 334.3 (279.6 to 409.1)    | -1.4 (-13.2 to 12.2)   |
|                |               | Female | 2680 (1870 to 3620)    | 1 (0.7 to 1.4)      | 19 (4.3 to 35.7)      | 303000 (262000 to 345000)    | 105.4 (91.4 to 119.5)     | 19.6 (4.7 to 35.9)     |
|                | Larynx cancer | Both   | 6050 (4300 to 8090)    | 1.1 (0.8 to 1.4)    | -3.5 (-15.3 to 10.5)  | 320000 (278000 to 370000)    | 55.3 (48.1 to 63.4)       | -8.8 (-19.9 to 4.3)    |
|                |               | Male   | 4890 (3450 to 6570)    | 1.8 (1.3 to 2.4)    | -3.7 (-17.7 to 12.5)  | 264000 (223000 to 313000)    | 92.7 (79 to 109.5)        | -8.9 (-22.1 to 6.7)    |
|                |               | Female | 1160 (819 to 1580)     | 0.4 (0.3 to 0.5)    | 0.1 (-11.8 to 13.8)   | 56700 (48500 to 65800)       | 18.7 (16.1 to 21.6)       | -5.8 (-17.7 to 8.8)    |
| Central Asia   | TBL cancer    | Both   | 3370 (2410 to 4440)    | 4.3 (3.1 to 5.7)    | -6.3 (-17.6 to 4.5)   | 384000 (346000 to 426000)    | 469.4 (424.9 to 518.1)    | -9 (-17.7 to 0.7)      |
|                |               | Male   | 2620 (1860 to 3440)    | 7.8 (5.5 to 10.1)   | -8.3 (-20 to 3.8)     | 303000 (267000 to 340000)    | 837.4 (743.2 to 931.9)    | -11.1 (-20.2 to -1)    |
|                |               | Female | 743 (524 to 992)       | 1.8 (1.2 to 2.3)    | 3 (-12.5 to 21.8)     | 81400 (72400 to 91600)       | 183.5 (163.7 to 205.3)    | 1 (-10.3 to 12.8)      |
|                | Larynx cancer | Both   | 988 (708 to 1320)      | 1.2 (0.9 to 1.6)    | -13.1 (-22.6 to -2.9) | 38100 (34000 to 42900)       | 45.4 (40.7 to 51.2)       | -22.2 (-30 to -13.1)   |
|                |               | Male   | 754 (542 to 1010)      | 2.1 (1.5 to 2.8)    | -12.3 (-23.5 to -0.7) | 30300 (26900 to 34400)       | 82.4 (73.5 to 93.5)       | -21.1 (-28.8 to -11.5) |
|                |               | Female | 233 (164 to 320)       | 0.5 (0.4 to 0.7)    | -14.5 (-26.4 to 0.3)  | 7830 (6650 to 9250)          | 16.9 (14.4 to 19.9)       | -24.9 (-36.2 to -9.4)  |
| Central Europe | TBL cancer    | Both   | 19100 (13400 to 25000) | 9.2 (6.5 to 12.1)   | -6.1 (-18 to 6.7)     | 1880000 (1650000 to 2150000) | 936.8 (814.1 to 1070.7)   | -9 (-20.8 to 3.5)      |
|                |               | Male   | 13500 (9500 to 17800)  | 14.6 (10.2 to 19.2) | -10.7 (-23.9 to 2.4)  | 1360000 (1170000 to 1570000) | 1477.2 (1272.9 to 1699.4) | -13.5 (-25.5 to -0.8)  |
|                |               | Female | 5600 (3910 to 7450)    | 4.9 (3.4 to 6.6)    | 3.7 (-11.6 to 20.1)   | 523000 (454000 to 599000)    | 485.1 (420 to 557.7)      | 1.4 (-11.9 to 16.7)    |
|                | Larynx cancer | Both   | 4930 (3530 to 6600)    | 2.6 (1.8 to 3.4)    | -4.7 (-18.1 to 9.1)   | 133000 (114000 to 152000)    | 69.3 (59.5 to 79.1)       | -15.1 (-27.2 to -3.1)  |
|                |               | Male   | 4360 (3110 to 5820)    | 4.9 (3.5 to 6.5)    | -6.6 (-19.6 to 7.7)   | 122000 (104000 to 140000)    | 135.7 (116.3 to 156)      | -16.6 (-28.5 to -4.2)  |
|                |               | Female | 574 (404 to 794)       | 0.6 (0.4 to 0.8)    | -0.7 (-13 to 14.1)    | 11300 (9260 to 13200)        | 11.1 (9.1 to 13)          | -12.1 (-23.8 to 2.4)   |

|                           |               |        |                        |                     |                       |                              |                           |                        |
|---------------------------|---------------|--------|------------------------|---------------------|-----------------------|------------------------------|---------------------------|------------------------|
| Eastern Europe            | TBL cancer    | Both   | 20600 (14500 to 26800) | 6 (4.3 to 7.8)      | -6.4 (-17.7 to 5.1)   | 1960000 (1720000 to 2200000) | 582.5 (512.4 to 652)      | -11.2 (-21.7 to -0.3)  |
|                           |               | Male   | 16300 (11400 to 21500) | 12 (8.4 to 15.7)    | -11.4 (-23.7 to 1.9)  | 1610000 (1380000 to 1840000) | 1164.2 (1004.2 to 1334.3) | -15.4 (-27.2 to -3.1)  |
|                           |               | Female | 4210 (2880 to 5590)    | 2.1 (1.4 to 2.7)    | 8.3 (-9.4 to 28.6)    | 354000 (301000 to 415000)    | 181 (153.2 to 213.4)      | 2.6 (-13.5 to 21.4)    |
|                           | Larynx cancer | Both   | 5900 (4100 to 8000)    | 1.8 (1.2 to 2.4)    | -3.5 (-16.2 to 10.6)  | 179000 (154000 to 205000)    | 54.5 (47 to 62.4)         | -16.6 (-27.9 to -4.6)  |
|                           |               | Male   | 5480 (3810 to 7420)    | 4 (2.8 to 5.4)      | -6.3 (-19.7 to 8.4)   | 170000 (146000 to 196000)    | 122.8 (105.6 to 141.1)    | -18.7 (-30.2 to -6.5)  |
|                           |               | Female | 417 (288 to 589)       | 0.2 (0.2 to 0.3)    | 5 (-7.3 to 20.1)      | 8680 (7370 to 10400)         | 4.8 (4 to 5.7)            | -9.5 (-23.4 to 9.3)    |
| Australasia               | TBL cancer    | Both   | 3910 (2700 to 5350)    | 8 (5.5 to 11)       | -7.9 (-26.1 to 15.2)  | 233000 (219000 to 246000)    | 492.9 (465.2 to 517.7)    | -9.7 (-13.6 to -5.6)   |
|                           |               | Male   | 2240 (1520 to 3130)    | 9.6 (6.6 to 13.5)   | -12.6 (-31.6 to 11.1) | 135000 (127000 to 144000)    | 596.1 (559.4 to 631.4)    | -13.1 (-17.9 to -8.3)  |
|                           |               | Female | 1670 (1130 to 2340)    | 6.6 (4.5 to 9.2)    | -1.6 (-24.1 to 27.7)  | 98000 (89700 to 105000)      | 401.3 (370.1 to 429.1)    | -4.9 (-10.2 to 1.2)    |
|                           | Larynx cancer | Both   | 575 (374 to 807)       | 1.2 (0.8 to 1.7)    | -7.7 (-27.4 to 17.9)  | 5960 (5440 to 6470)          | 12.9 (11.8 to 14)         | -13.8 (-21.2 to -6.2)  |
|                           |               | Male   | 490 (321 to 685)       | 2.2 (1.4 to 3.1)    | -8.1 (-28.8 to 18.3)  | 5140 (4660 to 5640)          | 23.2 (21 to 25.5)         | -14.1 (-22.6 to -5.1)  |
|                           |               | Female | 86 (55 to 126)         | 0.4 (0.2 to 0.5)    | -5.2 (-26.2 to 21.7)  | 819 (702 to 953)             | 3.5 (3 to 4)              | -11.6 (-22.1 to 0.1)   |
| High-income Asia Pacific  | TBL cancer    | Both   | 41500 (29200 to 54300) | 9.1 (6.5 to 11.9)   | -9 (-20 to 3.3)       | 1790000 (1620000 to 1890000) | 418.3 (388.1 to 438.4)    | -13.7 (-16.2 to -11.2) |
|                           |               | Male   | 29300 (20800 to 39100) | 14.3 (10.2 to 19.1) | -13.2 (-26.5 to 2.6)  | 1290000 (1190000 to 1360000) | 656.5 (612.8 to 689)      | -17.6 (-20.5 to -14.8) |
|                           |               | Female | 12200 (8490 to 16600)  | 4.8 (3.3 to 6.4)    | -2 (-16 to 13.8)      | 500000 (426000 to 543000)    | 215 (193.3 to 229.7)      | -6.7 (-10.5 to -3)     |
|                           | Larynx cancer | Both   | 4670 (3330 to 6340)    | 1.2 (0.8 to 1.6)    | -6.9 (-18.8 to 6.9)   | 30400 (27800 to 32700)       | 7.4 (6.9 to 8.1)          | -15.1 (-19.7 to -9.9)  |
|                           |               | Male   | 4070 (2840 to 5550)    | 2.2 (1.5 to 2.9)    | -9.3 (-22.5 to 5.9)   | 27100 (24900 to 29100)       | 14.1 (13.1 to 15.2)       | -17.1 (-21.9 to -11.7) |
|                           |               | Female | 604 (416 to 867)       | 0.3 (0.2 to 0.5)    | -3.7 (-14.3 to 8.3)   | 3310 (2860 to 3780)          | 1.6 (1.5 to 1.8)          | -14.4 (-19.1 to -8.1)  |
| High-income North America | TBL cancer    | Both   | 69600 (50200 to 90000) | 11.1 (8 to 14.4)    | -11.2 (-22.4 to 0.8)  | 4600000 (4400000 to 4750000) | 750.9 (719.8 to 774.8)    | -11.1 (-13.6 to -8.8)  |

|                        |               |        |                        |                    |                      |                              |                        |                        |
|------------------------|---------------|--------|------------------------|--------------------|----------------------|------------------------------|------------------------|------------------------|
|                        |               | Male   | 37100 (25800 to 49000) | 12.8 (8.9 to 17)   | -12.7 (-27.1 to 4.7) | 2570000 (2490000 to 2650000) | 897.1 (867.2 to 925.3) | -12.5 (-14.3 to -9.7)  |
|                        |               | Female | 32500 (23600 to 43000) | 9.7 (7 to 12.9)    | -10.1 (-25.7 to 7.5) | 2030000 (1900000 to 2140000) | 624.8 (586.8 to 659)   | -9.7 (-14.3 to -5.4)   |
|                        | Larynx cancer | Both   | 10800 (7480 to 14500)  | 1.8 (1.3 to 2.4)   | -5.5 (-19.4 to 10.9) | 118000 (114000 to 123000)    | 19.8 (19 to 20.6)      | -7.3 (-10.2 to -4)     |
|                        |               | Male   | 8720 (5920 to 11800)   | 3.1 (2.1 to 4.2)   | -5.8 (-22 to 13.6)   | 95300 (91100 to 99600)       | 33.8 (32.3 to 35.3)    | -7.2 (-10.9 to -3.3)   |
|                        |               | Female | 2060 (1420 to 2820)    | 0.7 (0.5 to 0.9)   | -7 (-20.4 to 9.5)    | 23000 (21300 to 25000)       | 7.4 (6.9 to 8)         | -9.9 (-14 to -4.7)     |
| Southern Latin America | TBL cancer    | Both   | 4490 (2940 to 6440)    | 5.4 (3.5 to 7.8)   | -4.5 (-26.7 to 24.1) | 438000 (414000 to 460000)    | 535.4 (507.2 to 562.5) | -8.1 (-12.7 to -3.5)   |
|                        |               | Male   | 2970 (1910 to 4260)    | 8 (5.2 to 11.5)    | -9.8 (-32 to 17.2)   | 295000 (280000 to 311000)    | 792.6 (753.2 to 834.1) | -12.9 (-17.5 to -8.1)  |
|                        |               | Female | 1530 (984 to 2160)     | 3.4 (2.2 to 4.8)   | 7.2 (-20.9 to 44.7)  | 143000 (132000 to 152000)    | 322.4 (298.8 to 344.6) | 3.2 (-4.4 to 11.3)     |
|                        | Larynx cancer | Both   | 1210 (804 to 1720)     | 1.5 (1 to 2.1)     | -4.9 (-27.2 to 23.9) | 31700 (29300 to 34400)       | 38.9 (36 to 42.3)      | -15.1 (-21.8 to -7.6)  |
|                        |               | Male   | 1050 (694 to 1490)     | 2.8 (1.9 to 4)     | -6.1 (-28.8 to 23.7) | 27800 (25600 to 30300)       | 74.6 (68.7 to 81.2)    | -16.1 (-23.4 to -8.2)  |
|                        |               | Female | 168 (111 to 245)       | 0.4 (0.2 to 0.5)   | 0.7 (-22 to 28.6)    | 3880 (3420 to 4320)          | 8.8 (7.8 to 9.8)       | -9.4 (-19.4 to 0.8)    |
| Western Europe         | TBL cancer    | Both   | 73600 (52200 to 95200) | 8.7 (6.2 to 11.3)  | -8 (-20.5 to 4.5)    | 5200000 (4960000 to 5370000) | 645.3 (619.4 to 665.7) | -11 (-13.5 to -8.9)    |
|                        |               | Male   | 47900 (33600 to 62400) | 12.1 (8.5 to 15.9) | -13.5 (-26.3 to 0)   | 3480000 (3330000 to 3600000) | 908.7 (872.5 to 940.7) | -15.8 (-18.6 to -13.5) |
|                        |               | Female | 25700 (18100 to 33600) | 5.8 (4.1 to 7.6)   | 1.4 (-11.7 to 17.2)  | 1720000 (1620000 to 1790000) | 413.2 (393.4 to 428.3) | -1.7 (-4.3 to 1.1)     |
|                        | Larynx cancer | Both   | 15100 (10800 to 20400) | 1.9 (1.4 to 2.6)   | -8.1 (-21.3 to 7.9)  | 205000 (194000 to 214000)    | 26.2 (25 to 27.4)      | -15.8 (-19.4 to -11.7) |
|                        |               | Male   | 12900 (9250 to 17600)  | 3.5 (2.5 to 4.7)   | -10.1 (-23.6 to 6.6) | 181000 (171000 to 190000)    | 48.6 (46.2 to 51)      | -17.6 (-21.5 to -13.2) |
|                        |               | Female | 2140 (1480 to 2910)    | 0.6 (0.4 to 0.8)   | -0.6 (-11.6 to 12.1) | 23900 (18900 to 26300)       | 5.9 (4.9 to 6.5)       | -7.1 (-12.3 to -0.1)   |
| Andean Latin America   | TBL cancer    | Both   | 1380 (932 to 1930)     | 2.5 (1.7 to 3.5)   | -4.9 (-27.3 to 19.6) | 138000 (110000 to 170000)    | 242.6 (193.5 to 299.3) | -7.7 (-27 to 15.8)     |
|                        |               | Male   | 752 (506 to 1060)      | 2.8 (1.9 to 4)     | -8.3 (-31.2 to 19.2) | 75500 (59700 to 94700)       | 277.3 (219.4 to 347.9) | -10.6 (-30.9 to 13)    |

|                        |               |        |                      |                  |                       |                           |                        |                       |
|------------------------|---------------|--------|----------------------|------------------|-----------------------|---------------------------|------------------------|-----------------------|
|                        | Larynx cancer | Female | 626 (412 to 881)     | 2.2 (1.4 to 3)   | -0.2 (-25.5 to 29.3)  | 62200 (49700 to 76700)    | 210.6 (168.6 to 259.4) | -3.6 (-23.8 to 21)    |
|                        |               | Both   | 240 (160 to 333)     | 0.4 (0.3 to 0.6) | -1.9 (-21.2 to 20.8)  | 8590 (6880 to 10600)      | 15.2 (12.3 to 18.7)    | -12.3 (-29.5 to 6.5)  |
|                        |               | Male   | 187 (125 to 262)     | 0.7 (0.5 to 1)   | -0.7 (-21.4 to 23.9)  | 6760 (5390 to 8370)       | 25.1 (20.1 to 31)      | -10.8 (-29.2 to 9.2)  |
|                        |               | Female | 52 (36 to 73)        | 0.2 (0.1 to 0.2) | -4.4 (-22.9 to 17.6)  | 1830 (1480 to 2260)       | 6.1 (5 to 7.6)         | -15.8 (-32.2 to 4)    |
| Caribbean              | TBL cancer    | Both   | 2650 (1870 to 3570)  | 5.1 (3.6 to 6.9) | 0.5 (-15.7 to 19.6)   | 251000 (214000 to 296000) | 484 (411.5 to 569.3)   | -1.4 (-16.1 to 15.1)  |
|                        |               | Male   | 1740 (1200 to 2330)  | 7.1 (4.9 to 9.5) | -0.2 (-17.3 to 20.5)  | 164000 (138000 to 193000) | 666.5 (561.9 to 782.7) | -2 (-16.4 to 14.9)    |
|                        |               | Female | 920 (630 to 1250)    | 3.3 (2.3 to 4.6) | 2.6 (-19 to 27.4)     | 87500 (73900 to 103000)   | 320.6 (270.8 to 378.2) | 0.6 (-14.8 to 17.9)   |
|                        | Larynx cancer | Both   | 1160 (803 to 1570)   | 2.2 (1.5 to 3)   | 6.6 (-12.9 to 30.7)   | 36600 (31100 to 42800)    | 70.3 (59.7 to 82)      | 1.1 (-14.5 to 18.1)   |
|                        |               | Male   | 991 (686 to 1360)    | 4 (2.8 to 5.5)   | 8.3 (-13.3 to 34.9)   | 32200 (27300 to 37800)    | 129.8 (110 to 152.1)   | 2.5 (-13.4 to 19.9)   |
|                        |               | Female | 167 (115 to 229)     | 0.6 (0.4 to 0.8) | 1.5 (-16.4 to 21.8)   | 4420 (3780 to 5220)       | 16.2 (13.9 to 19.1)    | -4 (-18.4 to 13.2)    |
| Central Latin America  | TBL cancer    | Both   | 6340 (4400 to 8620)  | 2.7 (1.9 to 3.7) | -1.3 (-16.5 to 16.1)  | 614000 (519000 to 728000) | 257.2 (217.7 to 304.3) | -3.6 (-18.3 to 13.8)  |
|                        |               | Male   | 3640 (2510 to 4920)  | 3.4 (2.3 to 4.6) | -5.2 (-21.2 to 12.9)  | 368000 (306000 to 440000) | 333.7 (279.4 to 398.5) | -6.8 (-22.1 to 11.8)  |
|                        |               | Female | 2710 (1840 to 3760)  | 2.1 (1.5 to 3)   | 5.5 (-13.1 to 30.7)   | 246000 (202000 to 298000) | 191.7 (157.3 to 231.9) | 2.6 (-14.3 to 22.4)   |
|                        | Larynx cancer | Both   | 1980 (1400 to 2720)  | 0.8 (0.6 to 1.1) | -2.3 (-17.5 to 13.9)  | 59700 (49900 to 71200)    | 25 (20.9 to 29.7)      | -9.6 (-24.3 to 7)     |
|                        |               | Male   | 1500 (1050 to 2090)  | 1.4 (1 to 1.9)   | -1.8 (-18.8 to 16.7)  | 50100 (41700 to 60000)    | 45.4 (37.8 to 54.1)    | -8.7 (-24.5 to 8.9)   |
|                        |               | Female | 475 (329 to 667)     | 0.4 (0.3 to 0.5) | -0.7 (-12.3 to 12)    | 9560 (7940 to 12700)      | 7.4 (6.2 to 9.9)       | -9.6 (-24 to 6.3)     |
| Tropical Latin America | TBL cancer    | Both   | 8540 (6130 to 11000) | 3.5 (2.5 to 4.5) | -6.4 (-12.3 to 0.5)   | 879000 (836000 to 921000) | 355.8 (337.7 to 372.5) | -9.2 (-12.6 to -5.5)  |
|                        |               | Male   | 4950 (3550 to 6350)  | 4.5 (3.2 to 5.8) | -12.2 (-19.7 to -4.5) | 514000 (486000 to 541000) | 458 (432.6 to 482.7)   | -15 (-19.2 to -10.6)  |
|                        |               | Female | 3590 (2560 to 4700)  | 2.7 (1.9 to 3.5) | 3.6 (-6.6 to 15.3)    | 365000 (340000 to 389000) | 272.4 (254 to 290)     | 1 (-4.6 to 6.7)       |
|                        | Larynx cancer | Both   | 3960 (2890 to 5230)  | 1.6 (1.2 to 2.1) | -6.2 (-13.3 to 0.8)   | 145000 (137000 to 152000) | 57.5 (54.5 to 60.4)    | -14.4 (-19 to -9.4)   |
|                        |               | Male   | 3320 (2410 to 4390)  | 2.9 (2.1 to 3.8) | -6.6 (-14.9 to 2.2)   | 127000 (120000 to 134000) | 109.1 (102.8 to 115.3) | -14.4 (-19.5 to -8.9) |

|                              |               |        |                           |                    |                      |                              |                        |                       |
|------------------------------|---------------|--------|---------------------------|--------------------|----------------------|------------------------------|------------------------|-----------------------|
|                              |               | Female | 642 (454 to 860)          | 0.5 (0.3 to 0.7)   | -3.2 (-10.4 to 5.3)  | 17600 (16000 to 19500)       | 13.1 (11.9 to 14.5)    | -12.9 (-19.3 to -4.6) |
| North Africa and Middle East | TBL cancer    | Both   | 16600 (11800 to 22100)    | 3.8 (2.7 to 5)     | 1.1 (-11.5 to 15.1)  | 1850000 (1630000 to 2100000) | 402.9 (355.4 to 455.9) | -1.4 (-12.9 to 11.2)  |
|                              |               | Male   | 12700 (9030 to 16900)     | 5.7 (4.1 to 7.6)   | -3.3 (-16 to 12.1)   | 1460000 (1280000 to 1660000) | 623.5 (548.6 to 707.3) | -5.2 (-16.9 to 8.7)   |
|                              |               | Female | 3840 (2660 to 5160)       | 1.8 (1.2 to 2.4)   | 17.8 (0.2 to 37.9)   | 394000 (340000 to 456000)    | 173.1 (149.5 to 199.5) | 13.8 (-0.9 to 27.8)   |
|                              | Larynx cancer | Both   | 6080 (4420 to 8110)       | 1.3 (1 to 1.8)     | 4.4 (-4.5 to 14.9)   | 203000 (179000 to 231000)    | 42.9 (38.3 to 48.6)    | -8.7 (-15.9 to -0.6)  |
|                              |               | Male   | 4990 (3610 to 6680)       | 2.2 (1.6 to 2.9)   | 2.3 (-7.3 to 13.8)   | 169000 (149000 to 194000)    | 70.6 (62.9 to 80.2)    | -10.2 (-17.7 to -1.4) |
|                              |               | Female | 1090 (781 to 1450)        | 0.5 (0.3 to 0.6)   | 12.8 (4.5 to 23.1)   | 33600 (29400 to 38700)       | 14.1 (12.5 to 16.1)    | -1.9 (-9.7 to 7.9)    |
| South Asia                   | TBL cancer    | Both   | 27300 (18900 to 36400)    | 1.9 (1.3 to 2.6)   | 6.5 (-9.3 to 22.9)   | 3060000 (2590000 to 3520000) | 206.6 (174.9 to 237.4) | 5 (-10.6 to 20.8)     |
|                              |               | Male   | 19700 (13500 to 26900)    | 2.8 (1.9 to 3.8)   | 0.7 (-17.9 to 21.3)  | 2220000 (1820000 to 2630000) | 303.9 (248.5 to 358.8) | -1.3 (-20 to 18)      |
|                              |               | Female | 7680 (5130 to 10600)      | 1.1 (0.7 to 1.5)   | 28.2 (3.3 to 56.5)   | 839000 (684000 to 1020000)   | 111.7 (91.2 to 135.7)  | 29.9 (3.7 to 60.3)    |
|                              | Larynx cancer | Both   | 22700 (16300 to 30000)    | 1.5 (1.1 to 2)     | -0.8 (-14.5 to 15.4) | 1110000 (957000 to 1300000)  | 73.2 (63 to 85.1)      | -8.4 (-21.8 to 7.2)   |
|                              |               | Male   | 18800 (13400 to 25300)    | 2.6 (1.8 to 3.4)   | -1.5 (-17.8 to 17.3) | 940000 (790000 to 1120000)   | 124.7 (105 to 148.5)   | -8.9 (-23.8 to 8.7)   |
|                              |               | Female | 3880 (2670 to 5320)       | 0.5 (0.4 to 0.7)   | 8.4 (-7.9 to 29.2)   | 172000 (143000 to 207000)    | 22.3 (18.6 to 26.7)    | 0.9 (-16.5 to 21.4)   |
| East Asia                    | TBL cancer    | Both   | 204000 (143000 to 270000) | 9.7 (6.8 to 12.8)  | 2.7 (-15.5 to 23.4)  | 1740000 (1460000 to 2050000) | 816.1 (686.2 to 960.1) | -5.4 (-21.5 to 13.9)  |
|                              |               | Male   | 142000 (96900 to 193000)  | 14.3 (9.9 to 19.4) | 1.4 (-19.8 to 29.1)  | 1210000 (958000 to 1510000)  | 1181.2 (937.1 to 1464) | -6.4 (-27.3 to 18.4)  |
|                              |               | Female | 62700 (41900 to 84500)    | 5.8 (3.9 to 7.8)   | 6.5 (-15.2 to 32.7)  | 5270000 (4250000 to 6440000) | 484 (391.1 to 590.9)   | -1.7 (-22.8 to 22.6)  |
|                              | Larynx cancer | Both   | 27500 (19000 to 38000)    | 1.3 (0.9 to 1.8)   | 13.9 (-6.1 to 39.3)  | 486000 (401000 to 587000)    | 22.5 (18.7 to 27.1)    | -9.7 (-26.7 to 10.8)  |
|                              |               | Male   | 23000 (15700 to 32300)    | 2.2 (1.5 to 3.1)   | 17.5 (-6 to 47.5)    | 412000 (329000 to 510000)    | 39.3 (31.6 to 48.3)    | -7.1 (-27 to 15.3)    |

|                            |               |        |                        |                   |                      |                              |                         |                      |
|----------------------------|---------------|--------|------------------------|-------------------|----------------------|------------------------------|-------------------------|----------------------|
|                            |               | Female | 4480 (3000 to 6140)    | 0.4 (0.3 to 0.6)  | 1.3 (-15.9 to 21.2)  | 73900 (59100 to 90000)       | 6.8 (5.5 to 8.3)        | -19 (-36.7 to -0.1)  |
| Oceania                    | TBL cancer    | Both   | 339 (208 to 513)       | 4.7 (3 to 7.1)    | 4.1 (-12.3 to 23.3)  | 41600 (31000 to 59100)       | 534.8 (404.1 to 758.9)  | 3.6 (-9.6 to 21.3)   |
|                            |               | Male   | 266 (159 to 418)       | 7.3 (4.5 to 11.3) | 2.1 (-15.2 to 24.3)  | 32900 (23700 to 49200)       | 820 (605.4 to 1209.8)   | 1.9 (-12 to 19.6)    |
|                            |               | Female | 73 (43 to 110)         | 2.1 (1.3 to 3.2)  | 11.4 (-13.5 to 42.8) | 8700 (6440 to 12300)         | 233.9 (174.6 to 327.3)  | 10.7 (-6 to 30.9)    |
|                            | Larynx cancer | Both   | 32 (22 to 45)          | 0.4 (0.3 to 0.6)  | -2.3 (-14.9 to 11.4) | 1460 (1110 to 1870)          | 19.2 (14.8 to 24.3)     | -4.8 (-18 to 9.7)    |
|                            |               | Male   | 24 (16 to 35)          | 0.7 (0.5 to 1)    | -2.4 (-16.6 to 13.8) | 1130 (827 to 1470)           | 29.8 (22.5 to 38.2)     | -4.6 (-18.8 to 11.9) |
|                            |               | Female | 7 (5 to 11)            | 0.2 (0.1 to 0.3)  | -3.5 (-19.6 to 16.7) | 335 (242 to 448)             | 8.4 (6.3 to 11.2)       | -6.1 (-23.8 to 16.2) |
| Southeast Asia             | TBL cancer    | Both   | 30300 (20700 to 40600) | 4.9 (3.4 to 6.6)  | 2.3 (-10.8 to 16.1)  | 3400000 (2840000 to 3930000) | 528 (442.1 to 610.4)    | 0.4 (-12.1 to 12.9)  |
|                            |               | Male   | 20700 (14400 to 27700) | 7.3 (5.1 to 9.8)  | 0.5 (-14.3 to 17.5)  | 2360000 (1970000 to 2740000) | 787.9 (665.4 to 914.6)  | -1.2 (-15.1 to 13.9) |
|                            |               | Female | 9540 (6050 to 14000)   | 2.9 (1.8 to 4.3)  | 6.6 (-10.3 to 24.4)  | 1040000 (789000 to 1310000)  | 305.6 (230.7 to 383.5)  | 4.3 (-10.9 to 20.3)  |
|                            | Larynx cancer | Both   | 5680 (3960 to 7790)    | 0.9 (0.6 to 1.2)  | 8.7 (-4.7 to 24.8)   | 184000 (158000 to 215000)    | 28.2 (24.4 to 32.8)     | -4.1 (-15.2 to 7.7)  |
|                            |               | Male   | 4800 (3330 to 6610)    | 1.6 (1.1 to 2.2)  | 11.3 (-3.6 to 29.6)  | 159000 (135000 to 189000)    | 52.2 (44.4 to 61.6)     | -2.1 (-14.2 to 10.9) |
|                            |               | Female | 880 (620 to 1200)      | 0.3 (0.2 to 0.4)  | -2.9 (-12.4 to 7.9)  | 25300 (21600 to 29200)       | 7.4 (6.4 to 8.6)        | -14 (-26 to -1.7)    |
| Central Sub-Saharan Africa | TBL cancer    | Both   | 1590 (886 to 2960)     | 2.9 (1.6 to 5.2)  | 5.5 (-15.3 to 36)    | 194000 (125000 to 337000)    | 326 (211.1 to 557.1)    | 5.3 (-12.3 to 30.2)  |
|                            |               | Male   | 1200 (621 to 2470)     | 4.8 (2.6 to 9.7)  | 0.1 (-20.8 to 35.4)  | 149000 (88700 to 287000)     | 549.5 (336.1 to 1042.4) | -0.7 (-16.8 to 23.1) |
|                            |               | Female | 385 (242 to 566)       | 1.3 (0.8 to 1.9)  | 19.9 (-9.6 to 58.9)  | 44700 (33100 to 60200)       | 141.2 (105.8 to 192.1)  | 23.1 (-2.9 to 56.2)  |
|                            | Larynx cancer | Both   | 375 (250 to 523)       | 0.7 (0.4 to 0.9)  | -1.2 (-17.7 to 17.6) | 20300 (15700 to 26000)       | 33.4 (26.1 to 42.2)     | -4.7 (-20.8 to 15)   |
|                            |               | Male   | 312 (207 to 438)       | 1.2 (0.8 to 1.7)  | -1.5 (-18.7 to 18.9) | 17000 (13000 to 21900)       | 61.5 (47.9 to 77.9)     | -5 (-21.8 to 14.8)   |
|                            |               | Female | 64 (41 to 91)          | 0.2 (0.1 to 0.3)  | -6.5 (-23.5 to 14.8) | 3290 (2480 to 4310)          | 9.9 (7.6 to 12.8)       | -10.8 (-28 to 11.1)  |
| Eastern sub-Saharan Africa | TBL cancer    | Both   | 2580 (1730 to 3650)    | 1.6 (1.1 to 2.3)  | 3.3 (-9.4 to 16.8)   | 296000 (246000 to 362000)    | 171.7 (144.2 to 208.7)  | 2.4 (-9.1 to 14.3)   |
|                            |               | Male   | 1840 (1220 to 2630)    | 2.5 (1.6 to 3.5)  | -0.6 (-14.9 to 15.1) | 210000 (173000 to 264000)    | 260.7 (217.5 to 323.9)  | -1.7 (-14.2 to 11.9) |

|                             |               |        |                     |                  |                       |                           |                        |                        |
|-----------------------------|---------------|--------|---------------------|------------------|-----------------------|---------------------------|------------------------|------------------------|
|                             | Larynx cancer | Female | 749 (503 to 1050)   | 0.9 (0.6 to 1.2) | 16.7 (0.6 to 36.1)    | 85700 (69500 to 103000)   | 91.3 (75 to 108.5)     | 16.9 (1.2 to 34.5)     |
|                             |               | Both   | 1130 (791 to 1540)  | 0.6 (0.4 to 0.9) | -4.9 (-13.7 to 5.7)   | 60400 (51100 to 75600)    | 32 (27.2 to 40.1)      | -9.1 (-18.3 to 1)      |
|                             |               | Male   | 893 (620 to 1230)   | 1 (0.7 to 1.4)   | -5 (-14.8 to 6.7)     | 48500 (40700 to 62800)    | 53.6 (45.2 to 69.3)    | -9.2 (-19 to 2.3)      |
|                             |               | Female | 239 (165 to 329)    | 0.2 (0.2 to 0.3) | -2.4 (-11.8 to 8.2)   | 11800 (9910 to 14000)     | 11.8 (10 to 13.8)      | -7 (-17.2 to 4.2)      |
| Southern sub-Saharan Africa | TBL cancer    | Both   | 2330 (1640 to 3070) | 4.1 (2.9 to 5.4) | -10.1 (-20.2 to 3.5)  | 269000 (242000 to 301000) | 451.6 (408 to 505.5)   | -13.3 (-22.1 to -1.1)  |
|                             |               | Male   | 1570 (1100 to 2110) | 6.5 (4.6 to 8.6) | -13 (-24.5 to 2.7)    | 187000 (166000 to 215000) | 725.7 (648.1 to 831.1) | -16.3 (-25.8 to -2.1)  |
|                             |               | Female | 757 (529 to 991)    | 2.3 (1.6 to 3.1) | -4.5 (-18 to 11)      | 81700 (71600 to 91600)    | 245.7 (216.3 to 274.8) | -6.9 (-18.4 to 7)      |
|                             | Larynx cancer | Both   | 548 (396 to 733)    | 0.9 (0.7 to 1.2) | -15.2 (-22.5 to -6.1) | 25200 (22900 to 28000)    | 40.9 (37.3 to 45.3)    | -23.5 (-29.8 to -14.9) |
|                             |               | Male   | 451 (328 to 605)    | 1.8 (1.3 to 2.4) | -15.5 (-23.3 to -5)   | 21300 (19300 to 23800)    | 80 (72.9 to 89.3)      | -24 (-30.4 to -14.7)   |
|                             |               | Female | 97 (68 to 130)      | 0.3 (0.2 to 0.4) | -14.9 (-23.9 to -3.9) | 3910 (3400 to 4500)       | 11.3 (9.9 to 12.9)     | -22.8 (-32.2 to -11.1) |
| Western sub-Saharan Africa  | TBL cancer    | Both   | 3770 (2570 to 5040) | 2.1 (1.4 to 2.7) | 2.7 (-12.2 to 20.4)   | 423000 (351000 to 508000) | 215.9 (180.5 to 255.5) | 1.8 (-12.6 to 19.7)    |
|                             |               | Male   | 2660 (1790 to 3600) | 3.1 (2.1 to 4.1) | 1.3 (-16.6 to 25.7)   | 299000 (243000 to 364000) | 325 (267.1 to 393.3)   | 0.6 (-16.6 to 22.5)    |
|                             |               | Female | 1100 (743 to 1510)  | 1.1 (0.8 to 1.5) | 17.4 (-4.4 to 41.1)   | 124000 (99900 to 150000)  | 115.7 (95 to 138.5)    | 17.8 (-3.4 to 43.2)    |
|                             | Larynx cancer | Both   | 1250 (858 to 1690)  | 0.6 (0.4 to 0.9) | -6.8 (-22.3 to 12.4)  | 62500 (49700 to 77300)    | 30.3 (24.4 to 37)      | -10.1 (-26.5 to 10.6)  |
|                             |               | Male   | 1130 (774 to 1540)  | 1.2 (0.8 to 1.6) | -2.3 (-19.6 to 19)    | 57600 (45200 to 71700)    | 58.6 (46.7 to 72.1)    | -5.4 (-23.2 to 18.8)   |
|                             |               | Female | 120 (81 to 166)     | 0.1 (0.1 to 0.1) | -3.7 (-15.2 to 8.5)   | 4900 (4050 to 5870)       | 4.5 (3.8 to 5.3)       | -7.5 (-20.4 to 8.2)    |
| Afghanistan                 | TBL cancer    | Both   | 346 (177 to 584)    | 2.6 (1.4 to 4.4) | 0 (-23 to 40.5)       | 44200 (24900 to 70900)    | 299.9 (178 to 477.2)   | 0.9 (-17.7 to 29.4)    |
|                             |               | Male   | 254 (120 to 471)    | 4.2 (2.1 to 7.7) | -3.9 (-29.5 to 42.9)  | 32600 (17400 to 57400)    | 481.8 (271.3 to 837.8) | -3.6 (-21.3 to 25)     |
|                             |               | Female | 91 (52 to 148)      | 1.2 (0.7 to 1.9) | 16.8 (-13.4 to 52.3)  | 11600 (7140 to 17300)     | 138.5 (91.8 to 197.1)  | 18 (-8.5 to 51.5)      |
|                             | Larynx cancer | Both   | 224 (135 to 342)    | 1.5 (0.9 to 2.2) | -4.7 (-24.9 to 20.9)  | 13400 (8800 to 18500)     | 83.9 (58.2 to 111.9)   | -8.2 (-25.7 to 13.2)   |
|                             |               | Male   | 154 (88 to 234)     | 2.3 (1.3 to 3.4) | -6 (-29.7 to 23.9)    | 9220 (5530 to 13500)      | 125.4 (81.4 to 175.7)  | -9.5 (-28.2 to 14.5)   |

|                |               |        |                   |                     |                       |                         |                          |                       |
|----------------|---------------|--------|-------------------|---------------------|-----------------------|-------------------------|--------------------------|-----------------------|
|                |               | Female | 70 (40 to 107)    | 0.9 (0.5 to 1.3)    | -2.4 (-25.1 to 29.1)  | 4170 (2650 to 5920)     | 46.5 (31.3 to 63.9)      | -6.9 (-28.5 to 23.2)  |
| Albania        | TBL cancer    | Both   | 269 (166 to 405)  | 6.3 (3.9 to 9.5)    | 15.7 (-18.5 to 58.2)  | 25700 (18700 to 34500)  | 608.8 (444.2 to 816.8)   | 11.3 (-18.2 to 47.6)  |
|                |               | Male   | 213 (130 to 328)  | 10.3 (6.3 to 15.7)  | 15.3 (-20.4 to 60.2)  | 20600 (14700 to 28400)  | 1005.8 (722.3 to 1381)   | 11.4 (-19.2 to 49.1)  |
|                |               | Female | 56 (34 to 87)     | 2.6 (1.6 to 3.9)    | 20.4 (-18.6 to 73.1)  | 5060 (3740 to 6630)     | 239.2 (177.9 to 315.5)   | 15.9 (-14.1 to 50.4)  |
|                | Larynx cancer | Both   | 73 (46 to 107)    | 1.7 (1.1 to 2.6)    | 11.9 (-18.7 to 50.5)  | 2030 (1450 to 2790)     | 49 (35.1 to 67.6)        | 1.3 (-25.4 to 34.4)   |
|                |               | Male   | 62 (39 to 92)     | 3.1 (1.9 to 4.6)    | 13.1 (-19.3 to 55)    | 1800 (1270 to 2490)     | 90.1 (63.9 to 123.9)     | 2.4 (-25.3 to 36.8)   |
|                |               | Female | 10 (6 to 15)      | 0.5 (0.3 to 0.7)    | 13.3 (-13.6 to 47.3)  | 226 (167 to 296)        | 10.9 (8.1 to 14.5)       | 4.2 (-22 to 35.8)     |
| Algeria        | TBL cancer    | Both   | 750 (487 to 1100) | 2.2 (1.5 to 3.3)    | -2.9 (-27.9 to 31)    | 80600 (61300 to 104000) | 229.6 (176.2 to 295.9)   | -4.9 (-25.9 to 22.1)  |
|                |               | Male   | 573 (355 to 867)  | 3.4 (2.1 to 5)      | -7.3 (-35 to 32.3)    | 62700 (46000 to 84000)  | 352.3 (261.1 to 470.4)   | -8.5 (-30.7 to 20.5)  |
|                |               | Female | 177 (120 to 254)  | 1.1 (0.7 to 1.5)    | 11.6 (-17.2 to 48.3)  | 18000 (14000 to 22400)  | 101.7 (79.8 to 126)      | 7.8 (-16.2 to 35.8)   |
|                | Larynx cancer | Both   | 367 (245 to 524)  | 1 (0.7 to 1.5)      | 4.8 (-18.6 to 35.4)   | 11300 (8670 to 14600)   | 31.6 (24.4 to 40.4)      | -10 (-31.2 to 15.1)   |
|                |               | Male   | 318 (208 to 456)  | 1.8 (1.2 to 2.6)    | 4.1 (-20.3 to 38)     | 10000 (7620 to 13000)   | 55.1 (42.3 to 70.9)      | -10.4 (-31.6 to 17.2) |
|                |               | Female | 49 (33 to 70)     | 0.3 (0.2 to 0.4)    | 4 (-17.6 to 28.3)     | 1300 (989 to 1670)      | 7 (5.4 to 8.9)           | -11.9 (-33.8 to 12.8) |
| American Samoa | TBL cancer    | Both   | 3 (2 to 4)        | 5.8 (4.1 to 7.7)    | -0.9 (-18.6 to 19.9)  | 314 (265 to 366)        | 631.8 (535.6 to 733)     | -1 (-14 to 13.7)      |
|                |               | Male   | 2 (1 to 3)        | 8.3 (5.8 to 11.3)   | -5.2 (-23.9 to 18.5)  | 220 (184 to 257)        | 912 (776.9 to 1054.1)    | -5.1 (-18.8 to 10.7)  |
|                |               | Female | 1 (1 to 1)        | 3.4 (2.3 to 5)      | 10.8 (-20.8 to 56)    | 94 (75 to 119)          | 370.8 (292.7 to 467.3)   | 11.5 (-10.9 to 39.8)  |
|                | Larynx cancer | Both   | 0 (0 to 0)        | 0.4 (0.2 to 0.5)    | -21.4 (-35.3 to -3.9) | 6 (5 to 7)              | 12 (10.1 to 14.4)        | -25.4 (-37.6 to -8.2) |
|                |               | Male   | 0 (0 to 0)        | 0.7 (0.5 to 0.9)    | -23.5 (-38.1 to -5.7) | 5 (4 to 6)              | 22.2 (18.5 to 26.9)      | -27.7 (-39.6 to -8.8) |
|                |               | Female | 0 (0 to 0)        | 0.1 (0.1 to 0.1)    | -0.4 (-19.3 to 23.3)  | 1 (1 to 1)              | 2.8 (2.2 to 3.5)         | -2 (-23.2 to 25.5)    |
| Andorra        | TBL cancer    | Both   | 14 (9 to 19)      | 9.9 (6.4 to 13.9)   | -3.8 (-24.4 to 22.6)  | 1070 (821 to 1360)      | 773.4 (591.4 to 981.3)   | -5.7 (-24.3 to 16.5)  |
|                |               | Male   | 11 (7 to 15)      | 15.3 (10.2 to 21.5) | -6.1 (-26.8 to 20.4)  | 851 (658 to 1080)       | 1197.5 (925.9 to 1520.8) | -7.7 (-25.4 to 13.7)  |
|                |               | Female | 3 (2 to 5)        | 4.4 (2.7 to 6.7)    | 9.5 (-25.2 to 56.4)   | 221 (156 to 299)        | 329 (232.8 to 444.5)     | 7.8 (-20.6 to 43.6)   |
|                | Larynx cancer | Both   | 3 (2 to 4)        | 2 (1.3 to 2.9)      | -10.6 (-33.5 to 20)   | 35 (26 to 46)           | 24.9 (18.5 to 32.8)      | -14.4 (-34.4 to 13.1) |
|                |               | Male   | 3 (2 to 4)        | 3.7 (2.4 to 5.4)    | -9.6 (-32.9 to 21.4)  | 33 (25 to 44)           | 46.2 (34.3 to 60.8)      | -13.5 (-33.9 to 15)   |
|                |               | Female | 0 (0 to 0)        | 0.2 (0.1 to 0.3)    | 5.6 (-19.6 to 38.6)   | 2 (1 to 2)              | 2.3 (1.6 to 3.1)         | 3.4 (-25.3 to 42.2)   |
| Angola         | TBL cancer    | Both   | 367 (238 to 542)  | 3.2 (2.1 to 4.6)    | 3.8 (-23.4 to 41.4)   | 44800 (34200 to 58300)  | 355.5 (278.1 to 456.2)   | 2.2 (-17.3 to 31.7)   |



|                     |               |        |                     |                    |                       |                           |                           |                       |
|---------------------|---------------|--------|---------------------|--------------------|-----------------------|---------------------------|---------------------------|-----------------------|
|                     |               | Male   | 276 (177 to 407)    | 5.3 (3.4 to 7.6)   | 1.4 (-26.5 to 42.7)   | 34100 (25800 to 44600)    | 598.6 (467.6 to 766.8)    | 0 (-20.2 to 29.2)     |
|                     |               | Female | 92 (57 to 141)      | 1.5 (0.9 to 2.2)   | 20.4 (-17.3 to 82.7)  | 10700 (7890 to 14600)     | 156.3 (118.4 to 210.6)    | 19.4 (-7.8 to 57)     |
|                     | Larynx cancer | Both   | 95 (63 to 134)      | 0.8 (0.5 to 1.1)   | -0.7 (-19.8 to 26.1)  | 5140 (3880 to 6710)       | 39.9 (31 to 51.5)         | -4.7 (-23.6 to 21.2)  |
|                     |               | Male   | 82 (54 to 116)      | 1.5 (1 to 2.1)     | 2.8 (-18.1 to 31.6)   | 4460 (3350 to 5830)       | 77 (59.6 to 101.1)        | -1 (-21.7 to 27.8)    |
|                     |               | Female | 14 (9 to 20)        | 0.2 (0.1 to 0.3)   | -6.2 (-27.4 to 22.6)  | 687 (491 to 950)          | 9.5 (7 to 13)             | -12.2 (-33.4 to 16.9) |
| Antigua and Barbuda | TBL cancer    | Both   | 2 (2 to 3)          | 2.2 (1.5 to 3)     | -2.5 (-24.8 to 25.4)  | 218 (183 to 255)          | 207.6 (176.1 to 242.3)    | -4.2 (-18.5 to 14.1)  |
|                     |               | Male   | 1 (1 to 2)          | 3 (1.9 to 4.1)     | -12 (-37.2 to 20.2)   | 137 (114 to 162)          | 276.3 (231.6 to 325.7)    | -13.5 (-27.5 to 6)    |
|                     |               | Female | 1 (1 to 1)          | 1.6 (1 to 2.2)     | 15 (-14.9 to 55.3)    | 81 (67 to 97)             | 146.8 (121.6 to 175.6)    | 13.1 (-7.4 to 39.1)   |
|                     | Larynx cancer | Both   | 1 (1 to 2)          | 1.1 (0.7 to 1.5)   | -1.9 (-23.5 to 24.2)  | 38 (31 to 47)             | 36.1 (29.5 to 43.9)       | -7.2 (-24.9 to 14.4)  |
|                     |               | Male   | 1 (1 to 2)          | 2.2 (1.5 to 3.1)   | -4.7 (-25.7 to 20.9)  | 37 (30 to 46)             | 74.1 (60.7 to 89.9)       | -9.9 (-27.2 to 11)    |
|                     |               | Female | 0 (0 to 0)          | 0.1 (0.1 to 0.1)   | 3.9 (-13.1 to 24.5)   | 1 (1 to 1)                | 1.9 (1.5 to 2.3)          | -0.6 (-19.5 to 22.7)  |
| Argentina           | TBL cancer    | Both   | 3170 (2060 to 4560) | 6 (3.8 to 8.6)     | -3.6 (-28.2 to 27.7)  | 316000 (296000 to 334000) | 601.6 (563.9 to 637.5)    | -7.3 (-13.3 to -1)    |
|                     |               | Male   | 2140 (1360 to 3100) | 9 (5.7 to 13)      | -8.3 (-32.8 to 21.7)  | 217000 (203000 to 231000) | 906.5 (848 to 968.2)      | -11.6 (-17.5 to -5)   |
|                     |               | Female | 1030 (643 to 1490)  | 3.5 (2.2 to 5.1)   | 7 (-25.2 to 50.2)     | 99100 (89600 to 109000)   | 349.8 (316.8 to 384.7)    | 2.9 (-7.6 to 13.9)    |
|                     | Larynx cancer | Both   | 896 (587 to 1270)   | 1.7 (1.1 to 2.4)   | -3.9 (-28.8 to 28.5)  | 24800 (22700 to 27300)    | 47.6 (43.4 to 52.4)       | -14 (-22.3 to -4.8)   |
|                     |               | Male   | 770 (500 to 1120)   | 3.2 (2.1 to 4.7)   | -5.5 (-31 to 28.9)    | 21700 (19700 to 24200)    | 90.9 (82.4 to 101.2)      | -15.2 (-24.3 to -5.2) |
|                     |               | Female | 126 (81 to 185)     | 0.4 (0.3 to 0.6)   | 2.8 (-23.1 to 35.4)   | 3090 (2670 to 3510)       | 10.9 (9.4 to 12.4)        | -7.5 (-20.1 to 5.7)   |
| Armenia             | TBL cancer    | Both   | 307 (214 to 416)    | 7.3 (5 to 9.9)     | -9.5 (-29.2 to 12.9)  | 32200 (26800 to 38300)    | 764.8 (638.2 to 910.9)    | -12.5 (-26.7 to 4.8)  |
|                     |               | Male   | 251 (172 to 340)    | 13.7 (9.4 to 18.6) | -10.6 (-31.5 to 14.1) | 26700 (22200 to 32000)    | 1443.1 (1204.7 to 1731.7) | -13.3 (-27.7 to 3.8)  |
|                     |               | Female | 56 (37 to 80)       | 2.4 (1.6 to 3.4)   | -4.2 (-30.2 to 26.8)  | 5480 (4510 to 6520)       | 240.2 (196.6 to 286.1)    | -8.1 (-25.1 to 10.9)  |
|                     | Larynx cancer | Both   | 78 (52 to 107)      | 1.8 (1.2 to 2.5)   | -7.1 (-28.8 to 21.1)  | 2700 (2200 to 3280)       | 63.7 (52.2 to 77)         | -17.6 (-33.1 to 0.2)  |
|                     |               | Male   | 69 (46 to 95)       | 3.7 (2.5 to 5.1)   | -7.4 (-30.3 to 23)    | 2460 (1990 to 2990)       | 131.7 (107.2 to 159.4)    | -17.7 (-33.1 to 0.4)  |
|                     |               | Female | 9 (6 to 13)         | 0.4 (0.3 to 0.6)   | -6.7 (-25.3 to 13.7)  | 243 (193 to 295)          | 10.5 (8.4 to 12.9)        | -17.1 (-33 to 0.8)    |
| Australia           | TBL cancer    | Both   | 3290 (2240 to 4680) | 8 (5.4 to 11.4)    | -8.6 (-30.5 to 18.5)  | 193000 (180000 to 204000) | 483.6 (453.6 to 511)      | -10.1 (-14.6 to -5.1) |

|            |               |        |                     |                   |                       |                           |                          |                        |
|------------|---------------|--------|---------------------|-------------------|-----------------------|---------------------------|--------------------------|------------------------|
|            |               | Male   | 1920 (1270 to 2720) | 9.8 (6.5 to 14)   | -13.4 (-36 to 15.2)   | 115000 (107000 to 122000) | 598.7 (557.8 to 638.4)   | -13.5 (-19.2 to -7.8)  |
|            |               | Female | 1370 (912 to 2000)  | 6.4 (4.3 to 9.3)  | -2 (-29.2 to 34.1)    | 78400 (71100 to 85000)    | 380.7 (347.9 to 412.1)   | -5 (-12.1 to 2)        |
|            | Larynx cancer | Both   | 506 (325 to 720)    | 1.3 (0.8 to 1.9)  | -8.1 (-30.3 to 19.9)  | 5200 (4680 to 5710)       | 13.4 (12.1 to 14.6)      | -14.1 (-22.2 to -5.3)  |
|            |               | Male   | 426 (271 to 613)    | 2.3 (1.4 to 3.3)  | -8.7 (-32.6 to 20.7)  | 4560 (4070 to 5030)       | 24.4 (21.9 to 27)        | -14.4 (-23.9 to -4.1)  |
|            |               | Female | 80 (51 to 118)      | 0.4 (0.3 to 0.6)  | -5.2 (-27.8 to 23.9)  | 645 (542 to 763)          | 3.2 (2.7 to 3.8)         | -11.4 (-24.3 to 2.6)   |
| Austria    | TBL cancer    | Both   | 1300 (875 to 1790)  | 7.9 (5.3 to 10.9) | -10.2 (-29.6 to 13.1) | 89000 (84000 to 93900)    | 558.3 (526.3 to 586.7)   | -13.7 (-18.9 to -8.8)  |
|            |               | Male   | 769 (508 to 1070)   | 10.1 (6.7 to 14)  | -17.7 (-37.9 to 5.8)  | 55400 (51600 to 59200)    | 734.7 (684.3 to 784.1)   | -20.5 (-26.6 to -14.8) |
|            |               | Female | 527 (356 to 756)    | 6.1 (4.1 to 8.7)  | 2 (-24.7 to 36.7)     | 33600 (30800 to 36500)    | 406.2 (374.2 to 439.2)   | -1.4 (-9.5 to 7.6)     |
|            | Larynx cancer | Both   | 204 (133 to 289)    | 1.3 (0.9 to 1.9)  | -12 (-30.8 to 12.1)   | 3290 (2990 to 3630)       | 21.4 (19.5 to 23.7)      | -19.7 (-27.8 to -10.2) |
|            |               | Male   | 177 (114 to 253)    | 2.4 (1.6 to 3.4)  | -13.8 (-34 to 10.7)   | 2900 (2600 to 3230)       | 39.5 (35.5 to 44.2)      | -21.1 (-30 to -10.9)   |
|            |               | Female | 27 (18 to 39)       | 0.4 (0.2 to 0.5)  | -5.5 (-23.7 to 18.7)  | 399 (339 to 469)          | 5 (4.2 to 5.9)           | -13.2 (-25.2 to 1.2)   |
| Azerbaijan | TBL cancer    | Both   | 563 (346 to 817)    | 5.4 (3.4 to 7.7)  | 0.5 (-24.5 to 29.7)   | 66800 (48800 to 85700)    | 610.1 (449.5 to 772)     | -1.9 (-21.2 to 20.5)   |
|            |               | Male   | 453 (259 to 676)    | 9.5 (5.6 to 14)   | 0.3 (-29 to 38.1)     | 54600 (36700 to 73100)    | 1073.7 (731.9 to 1424.9) | -1.9 (-24.9 to 27.1)   |
|            |               | Female | 109 (67 to 161)     | 2.1 (1.3 to 3)    | 2.9 (-30.1 to 45.8)   | 12300 (9360 to 15500)     | 220.4 (171.1 to 278.1)   | -0.7 (-22.2 to 25.6)   |
|            | Larynx cancer | Both   | 165 (108 to 240)    | 1.5 (1 to 2.2)    | -0.5 (-23 to 26.7)    | 7000 (5390 to 9250)       | 63.2 (49.5 to 84)        | -8.8 (-27.3 to 15)     |
|            |               | Male   | 132 (84 to 199)     | 2.7 (1.7 to 3.9)  | 0.7 (-25 to 37.1)     | 5850 (4330 to 7990)       | 114.2 (86 to 155.5)      | -7.1 (-27.7 to 21.3)   |
|            |               | Female | 33 (22 to 48)       | 0.6 (0.4 to 0.9)  | -3.8 (-24.4 to 21.8)  | 1150 (864 to 1530)        | 20.4 (15.5 to 27.1)      | -14.6 (-35.4 to 12.4)  |
| Bahamas    | TBL cancer    | Both   | 14 (9 to 19)        | 3.4 (2.3 to 4.7)  | -4.6 (-26.8 to 25.5)  | 1470 (1180 to 1840)       | 351.3 (284 to 439)       | -5.1 (-23.2 to 18.9)   |
|            |               | Male   | 10 (6 to 14)        | 5.2 (3.4 to 7.4)  | -6 (-31.2 to 26.8)    | 1040 (827 to 1320)        | 538.6 (433.5 to 680.8)   | -6.6 (-26.2 to 17.6)   |
|            |               | Female | 4 (3 to 6)          | 1.9 (1.2 to 2.7)  | -2 (-31.9 to 41.5)    | 432 (341 to 540)          | 193.1 (153.1 to 241.4)   | -2 (-21.6 to 22)       |
|            | Larynx cancer | Both   | 6 (4 to 9)          | 1.6 (1 to 2.3)    | 0.8 (-22.6 to 31.2)   | 260 (206 to 328)          | 61.3 (48.7 to 76.8)      | -0.1 (-21.3 to 26.2)   |
|            |               | Male   | 6 (4 to 9)          | 3.1 (2 to 4.5)    | 0.5 (-23.9 to 33.5)   | 241 (190 to 306)          | 123.7 (98 to 155.6)      | -0.3 (-21.6 to 26.4)   |
|            |               | Female | 1 (0 to 1)          | 0.3 (0.2 to 0.4)  | 0.3 (-18.8 to 22.9)   | 19 (15 to 23)             | 8.3 (6.6 to 10.6)        | -1 (-21.8 to 23.3)     |
| Bahrain    | TBL cancer    | Both   | 33 (21 to 49)       | 4.2 (2.8 to 5.9)  | -17 (-37.8 to 7.6)    | 3510 (2640 to 4710)       | 387.9 (292 to 498.4)     | -19.3 (-37 to 1.7)     |

|            |               |        |                     |                    |                       |                           |                           |                        |
|------------|---------------|--------|---------------------|--------------------|-----------------------|---------------------------|---------------------------|------------------------|
|            |               | Male   | 24 (15 to 37)       | 5.4 (3.5 to 7.9)   | -22.5 (-45.6 to 5.2)  | 2650 (1910 to 3670)       | 513.5 (382.4 to 678)      | -24.6 (-43.3 to -0.7)  |
|            |               | Female | 9 (6 to 12)         | 2.7 (1.8 to 3.8)   | -9.2 (-35.8 to 24.3)  | 861 (675 to 1060)         | 235.8 (188 to 286.4)      | -12.6 (-30.6 to 6.2)   |
|            | Larynx cancer | Both   | 9 (6 to 12)         | 0.9 (0.6 to 1.3)   | -9.3 (-33 to 17.8)    | 179 (135 to 233)          | 20.6 (15.3 to 26.6)       | -23.5 (-40.9 to -2.4)  |
|            |               | Male   | 8 (5 to 11)         | 1.5 (1 to 2.2)     | -14.5 (-39.1 to 15)   | 166 (124 to 217)          | 35.1 (25.8 to 45.4)       | -28 (-45.1 to -7)      |
|            |               | Female | 1 (1 to 1)          | 0.2 (0.1 to 0.3)   | -6.7 (-22.2 to 10.6)  | 13 (10 to 17)             | 3 (2.4 to 3.8)            | -22.7 (-39.9 to -1.8)  |
| Bangladesh | TBL cancer    | Both   | 2280 (1250 to 4050) | 1.7 (1 to 3.1)     | -2.7 (-34 to 36.8)    | 244000 (157000 to 382000) | 180 (116.6 to 281.8)      | -3.7 (-28.9 to 25.9)   |
|            |               | Male   | 1750 (870 to 3180)  | 2.6 (1.3 to 4.6)   | -4.9 (-39.8 to 40.9)  | 187000 (118000 to 306000) | 268.7 (170.3 to 436.7)    | -5.9 (-34.2 to 26.2)   |
|            |               | Female | 534 (306 to 871)    | 0.8 (0.5 to 1.4)   | 15.6 (-12.6 to 48)    | 56500 (37800 to 80600)    | 84.5 (56.3 to 120)        | 16.8 (-10.6 to 48.4)   |
|            | Larynx cancer | Both   | 1720 (1100 to 2590) | 1.3 (0.8 to 1.9)   | -8.9 (-31.5 to 20.6)  | 77400 (56400 to 112000)   | 56.5 (41.3 to 81.6)       | -19 (-37.6 to 5)       |
|            |               | Male   | 1480 (926 to 2330)  | 2.1 (1.3 to 3.3)   | -6.7 (-30.9 to 24.9)  | 67100 (47700 to 100000)   | 95.8 (68.2 to 143.3)      | -16.7 (-37 to 9.4)     |
|            |               | Female | 237 (158 to 350)    | 0.4 (0.2 to 0.5)   | -2.7 (-24.9 to 24.5)  | 10300 (7650 to 13500)     | 15 (11.2 to 19.6)         | -12.4 (-34.3 to 13.4)  |
| Barbados   | TBL cancer    | Both   | 11 (7 to 16)        | 2.3 (1.5 to 3.2)   | 2.2 (-24.2 to 33.7)   | 1040 (840 to 1250)        | 215.1 (173.9 to 259.3)    | 0.2 (-19.8 to 22.4)    |
|            |               | Male   | 7 (5 to 10)         | 3.3 (2.1 to 4.6)   | 2.9 (-26.5 to 42.4)   | 672 (535 to 821)          | 303.7 (242.2 to 370.2)    | 0.7 (-21.3 to 24.1)    |
|            |               | Female | 4 (3 to 6)          | 1.5 (1 to 2.1)     | -1.4 (-31 to 39.7)    | 366 (292 to 450)          | 140.6 (112.2 to 173.2)    | -2.3 (-21.9 to 21.5)   |
|            | Larynx cancer | Both   | 5 (3 to 7)          | 1 (0.7 to 1.5)     | 9 (-13 to 34.4)       | 157 (127 to 190)          | 32.4 (26.2 to 39.2)       | 4.9 (-15.4 to 27.2)    |
|            |               | Male   | 4 (3 to 6)          | 2 (1.3 to 2.8)     | 8.4 (-15.5 to 36.8)   | 140 (112 to 170)          | 62.7 (50.5 to 76.2)       | 4.2 (-16.4 to 27.4)    |
|            |               | Female | 1 (0 to 1)          | 0.3 (0.2 to 0.4)   | 2.4 (-14.3 to 22.4)   | 17 (14 to 21)             | 6.6 (5.3 to 8)            | -1.1 (-20.2 to 21)     |
| Belarus    | TBL cancer    | Both   | 890 (575 to 1270)   | 5.6 (3.6 to 8.1)   | -11.3 (-35.4 to 19.7) | 88600 (67600 to 116000)   | 566.4 (432.7 to 740.2)    | -18.1 (-37.5 to 7.3)   |
|            |               | Male   | 753 (480 to 1100)   | 11.9 (7.6 to 17.3) | -14.1 (-39.1 to 16.9) | 77100 (58800 to 101000)   | 1198.8 (920.7 to 1559.6)  | -20.3 (-39.2 to 3.4)   |
|            |               | Female | 136 (84 to 203)     | 1.4 (0.9 to 2.1)   | 1.9 (-33 to 48.1)     | 11500 (8570 to 15100)     | 127 (93.8 to 169.2)       | -6.1 (-31.2 to 25.5)   |
|            | Larynx cancer | Both   | 323 (202 to 475)    | 2.1 (1.3 to 3.1)   | -2.1 (-30 to 39)      | 9540 (7250 to 12700)      | 62.4 (47.5 to 82.5)       | -21.5 (-40.7 to 5.8)   |
|            |               | Male   | 312 (195 to 462)    | 4.8 (3 to 7.1)     | -3.3 (-31.1 to 36.6)  | 9300 (7040 to 12500)      | 142.7 (108.8 to 190.4)    | -22.1 (-41.1 to 4.5)   |
|            |               | Female | 11 (7 to 18)        | 0.1 (0.1 to 0.2)   | 0 (-26.2 to 33)       | 241 (171 to 404)          | 2.9 (2 to 4.6)            | -20.8 (-42.9 to 7.5)   |
| Belgium    | TBL cancer    | Both   | 2060 (1360 to 2940) | 9.7 (6.4 to 14)    | -5.8 (-28 to 23.3)    | 160000 (150000 to 169000) | 783.7 (737.7 to 829.7)    | -11.6 (-16.6 to -6.3)  |
|            |               | Male   | 1420 (937 to 2040)  | 14.2 (9.4 to 20.4) | -11 (-33.4 to 16.7)   | 112000 (105000 to 118000) | 1141.4 (1071.4 to 1207.8) | -16.5 (-21.2 to -11.3) |

|         |               |        |                  |                    |                       |                        |                        |                        |
|---------|---------------|--------|------------------|--------------------|-----------------------|------------------------|------------------------|------------------------|
|         | Larynx cancer | Female | 637 (420 to 924) | 5.9 (3.9 to 8.6)   | 4.2 (-23.3 to 41.9)   | 48300 (44600 to 52300) | 471.2 (434.8 to 510.1) | -1.4 (-9.3 to 7.2)     |
|         |               | Both   | 394 (255 to 571) | 2 (1.3 to 2.9)     | -11.3 (-35.1 to 19.4) | 5360 (4860 to 5910)    | 27.7 (25 to 30.6)      | -21.5 (-29.4 to -12.6) |
|         |               | Male   | 341 (218 to 493) | 3.6 (2.3 to 5.2)   | -12.7 (-37.6 to 20)   | 4560 (4080 to 5080)    | 48.9 (43.7 to 54.4)    | -22.9 (-31.7 to -13.4) |
|         |               | Female | 52 (34 to 77)    | 0.6 (0.4 to 0.8)   | -9 (-30.5 to 17.2)    | 800 (688 to 936)       | 8.1 (7 to 9.5)         | -18.3 (-29.7 to -3.4)  |
| Belize  | TBL cancer    | Both   | 9 (6 to 12)      | 3.1 (2.1 to 4.3)   | 0.9 (-23 to 27.9)     | 970 (826 to 1130)      | 324.9 (277.9 to 374.9) | 0 (-14.7 to 16.5)      |
|         |               | Male   | 6 (4 to 9)       | 4.5 (3 to 6.2)     | 2.5 (-25.2 to 37.7)   | 708 (593 to 834)       | 470.4 (395.3 to 551.6) | 1.8 (-14.9 to 21.5)    |
|         |               | Female | 2 (2 to 3)       | 1.7 (1.1 to 2.4)   | -1.3 (-30 to 38.1)    | 262 (223 to 309)       | 175 (148.4 to 205.2)   | -2 (-17.3 to 16.7)     |
|         | Larynx cancer | Both   | 3 (2 to 4)       | 1 (0.7 to 1.4)     | 3.5 (-14.1 to 25.8)   | 126 (108 to 147)       | 41.9 (35.9 to 48.9)    | 1.3 (-13.4 to 18.4)    |
|         |               | Male   | 3 (2 to 4)       | 1.8 (1.3 to 2.5)   | 5.8 (-13.4 to 30)     | 114 (97 to 134)        | 75.3 (64.3 to 88.4)    | 3.8 (-12 to 22)        |
|         |               | Female | 0 (0 to 0)       | 0.2 (0.2 to 0.3)   | -2.3 (-16.2 to 13.6)  | 11 (9 to 13)           | 7.5 (6.4 to 8.9)       | -5.2 (-19.8 to 11.8)   |
| Benin   | TBL cancer    | Both   | 112 (72 to 165)  | 2.4 (1.5 to 3.4)   | 0 (-24.2 to 31.4)     | 12700 (9410 to 16900)  | 249.8 (189.6 to 328.4) | -0.5 (-19 to 21.9)     |
|         |               | Male   | 80 (49 to 121)   | 3.7 (2.2 to 5.4)   | -4.1 (-29.4 to 32.9)  | 9090 (6700 to 12300)   | 389.2 (293.5 to 516.1) | -4.9 (-22.9 to 17.3)   |
|         |               | Female | 32 (21 to 47)    | 1.2 (0.8 to 1.8)   | 10.2 (-19.4 to 49.3)  | 3610 (2660 to 4820)    | 128.4 (97.5 to 167.9)  | 10.2 (-11.9 to 36.2)   |
|         | Larynx cancer | Both   | 30 (19 to 43)    | 0.6 (0.4 to 0.9)   | -1.7 (-21 to 24.1)    | 1490 (1090 to 1980)    | 29 (21.5 to 38.1)      | -5.4 (-23.7 to 16.6)   |
|         |               | Male   | 27 (17 to 38)    | 1.2 (0.8 to 1.6)   | -2.1 (-22.5 to 25.2)  | 1330 (960 to 1770)     | 55.2 (40.3 to 72.6)    | -6 (-24.7 to 16.6)     |
|         |               | Female | 3 (2 to 5)       | 0.1 (0.1 to 0.2)   | -5.3 (-25 to 18.8)    | 158 (116 to 214)       | 5.7 (4.2 to 7.6)       | -7.9 (-28.4 to 16.8)   |
| Bermuda | TBL cancer    | Both   | 8 (6 to 11)      | 6.5 (4.5 to 8.9)   | -5.9 (-23 to 15.8)    | 638 (537 to 773)       | 514.9 (432.5 to 623.9) | -10.5 (-23.8 to 6.9)   |
|         |               | Male   | 6 (4 to 8)       | 10.3 (7.1 to 14.3) | -8.7 (-27.8 to 14.8)  | 454 (385 to 544)       | 801.1 (674.5 to 957.9) | -13.4 (-26.5 to 3.6)   |
|         |               | Female | 2 (2 to 4)       | 3.4 (2.3 to 4.9)   | -1.5 (-25.4 to 33)    | 184 (147 to 234)       | 271.9 (217.8 to 346.4) | -5.3 (-22.1 to 16.2)   |
|         | Larynx cancer | Both   | 2 (1 to 3)       | 1.7 (1.2 to 2.5)   | -0.4 (-23.6 to 28.9)  | 44 (36 to 54)          | 36 (29.5 to 44.1)      | -9.7 (-26.3 to 10.4)   |
|         |               | Male   | 2 (1 to 3)       | 3.5 (2.3 to 4.9)   | -2.4 (-26.1 to 28)    | 42 (34 to 51)          | 73.6 (60.2 to 89.7)    | -11.4 (-27.8 to 8.5)   |
|         |               | Female | 0 (0 to 0)       | 0.3 (0.2 to 0.4)   | 1.9 (-15.5 to 24.4)   | 3 (2 to 3)             | 3.8 (3 to 4.9)         | -7.3 (-24.7 to 18.3)   |
| Bhutan  | TBL cancer    | Both   | 10 (6 to 15)     | 1.8 (1.1 to 2.7)   | 6.4 (-18.5 to 38.8)   | 1060 (756 to 1460)     | 182.5 (131 to 251.3)   | 4.9 (-13 to 26.6)      |
|         |               | Male   | 7 (4 to 11)      | 2.5 (1.5 to 4)     | 4.2 (-23.8 to 41.1)   | 767 (499 to 1080)      | 258.6 (166.5 to 367.9) | 2.5 (-15.9 to 24.5)    |
|         |               | Female | 3 (2 to 5)       | 1 (0.6 to 1.7)     | 15.4 (-13.9 to 63.9)  | 295 (192 to 470)       | 102.6 (67.6 to 163.6)  | 15.4 (-5.8 to 45)      |
|         | Larynx cancer | Both   | 7 (4 to 11)      | 1.2 (0.7 to 1.8)   | 2.4 (-20.2 to 29.3)   | 303 (207 to 453)       | 51.3 (35.2 to 76)      | -6.7 (-25.1 to 16.5)   |
|         |               | Male   | 6 (3 to 9)       | 1.9 (1.1 to 2.9)   | 2.9 (-22 to 34.3)     | 247 (161 to 385)       | 81.4 (53.6 to 125.5)   | -5.8 (-26.6 to 19.4)   |
|         |               | Female | 1 (1 to 2)       | 0.5 (0.3 to 0.7)   | 4.4 (-21.1 to 38)     | 57 (40 to 80)          | 19.4 (13.9 to 26.7)    | -5.7 (-27.4 to 23.2)   |

|                        |               |        |                      |                    |                       |                           |                           |                        |
|------------------------|---------------|--------|----------------------|--------------------|-----------------------|---------------------------|---------------------------|------------------------|
| Bolivia                | TBL cancer    | Both   | 261 (152 to 401)     | 3 (1.7 to 4.6)     | 7.2 (-20.5 to 40.6)   | 28000 (18500 to 38200)    | 308.4 (202.6 to 423.3)    | 5.1 (-16.4 to 28.4)    |
|                        |               | Male   | 156 (85 to 249)      | 3.8 (2 to 6)       | 5.4 (-23.9 to 46.9)   | 16700 (10600 to 23600)    | 389.4 (240.9 to 552)      | 3.5 (-18.1 to 28)      |
|                        |               | Female | 105 (59 to 163)      | 2.3 (1.3 to 3.6)   | 9.7 (-24.7 to 50.7)   | 11300 (7560 to 15400)     | 236 (159.1 to 321.9)      | 7.4 (-14.3 to 31.3)    |
|                        | Larynx cancer | Both   | 57 (37 to 83)        | 0.6 (0.4 to 0.9)   | 6.9 (-17 to 34.4)     | 2500 (1900 to 3290)       | 27.7 (21.1 to 36.1)       | -1.1 (-21.7 to 23.7)   |
|                        |               | Male   | 44 (28 to 66)        | 1.1 (0.7 to 1.6)   | 8.6 (-18.8 to 42.3)   | 1950 (1430 to 2580)       | 45.8 (33.6 to 60.2)       | 0.8 (-21.9 to 28.2)    |
|                        |               | Female | 13 (8 to 19)         | 0.3 (0.2 to 0.4)   | 0.6 (-19.6 to 25.9)   | 545 (412 to 722)          | 11.3 (8.6 to 14.9)        | -7.7 (-26.4 to 17.5)   |
| Bosnia and Herzegovina | TBL cancer    | Both   | 548 (350 to 786)     | 9.1 (5.8 to 13)    | -2.1 (-28.5 to 28.3)  | 56200 (43100 to 71200)    | 948.8 (728.7 to 1202.7)   | -4 (-26.6 to 22.5)     |
|                        |               | Male   | 415 (264 to 598)     | 15.2 (9.7 to 21.7) | -6.1 (-33.3 to 24.3)  | 43400 (33100 to 54700)    | 1581.3 (1211.9 to 1998.7) | -7.7 (-30.2 to 18.3)   |
|                        |               | Female | 133 (84 to 195)      | 4.1 (2.6 to 6.1)   | 10.1 (-24.2 to 55.4)  | 12800 (9980 to 16500)     | 412.3 (316.9 to 530.9)    | 8.4 (-16.6 to 39.9)    |
|                        | Larynx cancer | Both   | 115 (75 to 163)      | 1.9 (1.3 to 2.8)   | 5.3 (-22.1 to 37.6)   | 3600 (2750 to 4670)       | 60.7 (46.2 to 78.9)       | -1.6 (-24.4 to 27.2)   |
|                        |               | Male   | 100 (64 to 144)      | 3.7 (2.4 to 5.3)   | 4.6 (-24.2 to 38.6)   | 3250 (2460 to 4200)       | 119.1 (90.7 to 155.1)     | -2.2 (-25.2 to 27.1)   |
|                        |               | Female | 15 (10 to 21)        | 0.5 (0.3 to 0.7)   | 3.9 (-17.2 to 32.7)   | 350 (272 to 451)          | 11.2 (8.7 to 14.5)        | -2.7 (-25.9 to 26.4)   |
| Botswana               | TBL cancer    | Both   | 68 (42 to 104)       | 4.8 (3 to 7.2)     | -1.1 (-26.1 to 31.1)  | 8260 (5580 to 11300)      | 541.3 (374.3 to 721.8)    | -3.9 (-24.4 to 21.1)   |
|                        |               | Male   | 48 (29 to 72)        | 7.7 (4.8 to 11.3)  | -5.6 (-29.7 to 26.2)  | 5920 (4040 to 7780)       | 878.1 (615.7 to 1121.1)   | -8.2 (-27.2 to 14.8)   |
|                        |               | Female | 21 (11 to 35)        | 2.7 (1.4 to 4.4)   | 7.3 (-29.2 to 63.6)   | 2340 (1450 to 3550)       | 282.3 (178 to 424.6)      | 5.5 (-21.4 to 46.6)    |
|                        | Larynx cancer | Both   | 20 (13 to 30)        | 1.3 (0.8 to 1.9)   | -6.3 (-29.9 to 22.3)  | 889 (616 to 1240)         | 55.9 (39.5 to 76.8)       | -16.1 (-35.2 to 6.1)   |
|                        |               | Male   | 16 (10 to 25)        | 2.4 (1.5 to 3.7)   | -8.3 (-31.5 to 22.3)  | 745 (513 to 1050)         | 106.7 (76.1 to 147.4)     | -17.7 (-36.4 to 3.1)   |
|                        |               | Female | 4 (2 to 6)           | 0.4 (0.2 to 0.7)   | -0.5 (-29.6 to 42.3)  | 145 (90 to 217)           | 16.3 (10.4 to 24)         | -9.7 (-36.1 to 30)     |
| Brazil                 | TBL cancer    | Both   | 8340 (5980 to 10700) | 3.5 (2.5 to 4.5)   | -6.6 (-12.4 to 0.3)   | 858000 (816000 to 898000) | 355.6 (337.5 to 372.4)    | -9.4 (-12.8 to -5.7)   |
|                        |               | Male   | 4810 (3440 to 6180)  | 4.5 (3.2 to 5.8)   | -12.5 (-20.1 to -4.7) | 498000 (472000 to 525000) | 455 (429.7 to 480)        | -15.4 (-19.5 to -10.8) |
|                        |               | Female | 3540 (2520 to 4620)  | 2.7 (1.9 to 3.5)   | 3.5 (-7 to 15.1)      | 360000 (336000 to 384000) | 274.8 (256.3 to 292.9)    | 1 (-4.6 to 6.7)        |
|                        | Larynx cancer | Both   | 3910 (2840 to 5160)  | 1.6 (1.2 to 2.1)   | -6.5 (-13.7 to 0.8)   | 143000 (135000 to 150000) | 58 (54.9 to 60.9)         | -14.7 (-19.3 to -9.8)  |
|                        |               | Male   | 3270 (2370 to 4320)  | 2.9 (2.1 to 3.9)   | -6.9 (-15.3 to 1.8)   | 125000 (118000 to 132000) | 110.1 (103.6 to 116.2)    | -14.7 (-19.9 to -9.2)  |
|                        |               | Female | 637 (451 to 854)     | 0.5 (0.3 to 0.7)   | -3.3 (-10.5 to 5.3)   | 17400 (15800 to 19300)    | 13.3 (12.1 to 14.7)       | -13 (-19.5 to -4.8)    |

|              |               |        |                    |                    |                      |                          |                          |                      |
|--------------|---------------|--------|--------------------|--------------------|----------------------|--------------------------|--------------------------|----------------------|
| Brunei       | TBL cancer    | Both   | 27 (19 to 36)      | 10.2 (7.3 to 13.4) | 1.1 (-13.7 to 18.8)  | 2550 (2250 to 2890)      | 857.4 (759.8 to 962.9)   | -1.6 (-14 to 12.8)   |
|              |               | Male   | 15 (10 to 20)      | 13.2 (9.2 to 17.7) | 1.8 (-18.5 to 26.8)  | 1390 (1150 to 1650)      | 1073.8 (907.5 to 1245.9) | -2.8 (-18.8 to 14.9) |
|              |               | Female | 13 (9 to 18)       | 8.6 (5.9 to 11.7)  | 6 (-19.1 to 33.7)    | 1160 (970 to 1370)       | 722.2 (612.4 to 838.7)   | 3.4 (-12.9 to 21.3)  |
|              | Larynx cancer | Both   | 4 (3 to 6)         | 1.4 (1 to 1.9)     | -5.6 (-22.9 to 14.1) | 62 (52 to 76)            | 20.9 (17.6 to 25.1)      | -14.1 (-27.7 to 2.4) |
|              |               | Male   | 3 (2 to 5)         | 2.3 (1.6 to 3.3)   | -1.9 (-24.9 to 24.8) | 50 (40 to 63)            | 38.2 (31.4 to 46.9)      | -9.7 (-25.9 to 9.7)  |
|              |               | Female | 1 (1 to 2)         | 0.7 (0.5 to 1)     | -6 (-24.7 to 15.5)   | 13 (10 to 15)            | 8 (6.7 to 9.5)           | -16 (-30.5 to 1.9)   |
| Bulgaria     | TBL cancer    | Both   | 1120 (743 to 1570) | 8.5 (5.6 to 12.1)  | -3.4 (-27.4 to 28.6) | 115000 (90800 to 145000) | 925.8 (724.1 to 1171)    | -3.8 (-25.3 to 23.6) |
|              |               | Male   | 889 (580 to 1260)  | 14.9 (9.7 to 20.9) | -7.1 (-31.4 to 25.7) | 92200 (72700 to 116000)  | 1580.6 (1236.9 to 1993)  | -7.9 (-28.7 to 19)   |
|              |               | Female | 228 (144 to 329)   | 3.2 (2 to 4.7)     | 8.6 (-26.7 to 59.6)  | 23200 (17900 to 29400)   | 355.3 (272 to 452.3)     | 9.5 (-16.8 to 41)    |
|              | Larynx cancer | Both   | 371 (239 to 531)   | 3 (1.9 to 4.3)     | 4.8 (-24.5 to 42.9)  | 10500 (8000 to 13500)    | 87 (66.2 to 111.9)       | -6.8 (-30.3 to 21.7) |
|              |               | Male   | 348 (223 to 501)   | 6.1 (3.9 to 8.7)   | 2.7 (-26.7 to 40.7)  | 9980 (7570 to 12800)     | 174.5 (132.8 to 224.2)   | -8.7 (-32.1 to 19.7) |
|              |               | Female | 22 (15 to 32)      | 0.4 (0.2 to 0.5)   | 12.7 (-12.4 to 45.1) | 557 (415 to 729)         | 8.7 (6.4 to 11.6)        | 1.9 (-25 to 35.6)    |
| Burkina Faso | TBL cancer    | Both   | 203 (128 to 302)   | 2.3 (1.4 to 3.3)   | 15 (-13.2 to 51.4)   | 23300 (17900 to 31100)   | 241.8 (187.9 to 325.7)   | 15.9 (-4 to 41.6)    |
|              |               | Male   | 151 (92 to 232)    | 3.8 (2.3 to 5.7)   | 15.6 (-16 to 60.5)   | 17500 (12900 to 24100)   | 405.6 (303.7 to 563.1)   | 15.7 (-4.9 to 43.3)  |
|              |               | Female | 52 (31 to 80)      | 1 (0.6 to 1.6)     | 23.2 (-7.3 to 65.4)  | 5860 (4110 to 8160)      | 107 (76.5 to 147.4)      | 27 (4.9 to 56)       |
|              | Larynx cancer | Both   | 66 (43 to 93)      | 0.7 (0.5 to 1)     | 9.4 (-13.7 to 39.8)  | 3400 (2600 to 4370)      | 34.8 (26.7 to 44)        | 8.5 (-11.8 to 35.1)  |
|              |               | Male   | 58 (38 to 84)      | 1.4 (0.9 to 2)     | 12.6 (-12.8 to 45.6) | 3050 (2280 to 3960)      | 69.1 (52.5 to 89.2)      | 11.5 (-10.6 to 40.1) |
|              |               | Female | 7 (5 to 11)        | 0.1 (0.1 to 0.2)   | 8.4 (-13 to 38.1)    | 352 (265 to 451)         | 6.4 (4.9 to 8.2)         | 7.4 (-16 to 38.7)    |
| Burundi      | TBL cancer    | Both   | 75 (45 to 117)     | 1.7 (1 to 2.5)     | -2 (-25 to 29.8)     | 8700 (6010 to 12200)     | 176.4 (123.6 to 241.9)   | -2.1 (-21 to 20.1)   |
|              |               | Male   | 57 (34 to 88)      | 2.5 (1.5 to 3.7)   | -6.6 (-31.2 to 28.4) | 6670 (4570 to 9310)      | 263.5 (184.8 to 364.1)   | -6.5 (-24.5 to 15.8) |
|              |               | Female | 18 (10 to 29)      | 0.8 (0.5 to 1.3)   | 4.7 (-15.4 to 29.5)  | 2040 (1340 to 3000)      | 81.9 (54.6 to 119.7)     | 4.3 (-16.5 to 30.4)  |
|              | Larynx cancer | Both   | 39 (24 to 58)      | 0.8 (0.5 to 1.1)   | -6 (-25.1 to 18.5)   | 2190 (1540 to 3110)      | 40.3 (28.9 to 56.4)      | -7.3 (-25.7 to 17)   |
|              |               | Male   | 31 (19 to 48)      | 1.2 (0.7 to 1.8)   | -7.8 (-27.6 to 17.8) | 1760 (1200 to 2600)      | 62 (43.1 to 90.3)        | -8.9 (-28.2 to 15.9) |
|              |               | Female | 8 (5 to 12)        | 0.3 (0.2 to 0.5)   | -8.4 (-29.3 to 16.5) | 435 (306 to 609)         | 16.1 (11.4 to 22.2)      | -10.3 (-31.6 to 18)  |

|            |               |        |                      |                   |                       |                           |                          |                       |
|------------|---------------|--------|----------------------|-------------------|-----------------------|---------------------------|--------------------------|-----------------------|
| Cabo Verde | TBL cancer    | Both   | 16 (10 to 22)        | 3.8 (2.5 to 5.3)  | 35.7 (-1.3 to 79)     | 1670 (1340 to 2010)       | 390.4 (309.9 to 472.2)   | 31.3 (2.9 to 63)      |
|            |               | Male   | 10 (6 to 15)         | 5.8 (3.4 to 8.3)  | 36.8 (-13.3 to 92.4)  | 1080 (823 to 1340)        | 588.7 (433.4 to 730.9)   | 33 (-3.1 to 71.5)     |
|            |               | Female | 6 (4 to 8)           | 2.5 (1.6 to 3.5)  | 30.2 (-9.5 to 82.8)   | 586 (474 to 713)          | 242.2 (196 to 293.8)     | 25 (-2 to 57.6)       |
|            | Larynx cancer | Both   | 3 (2 to 5)           | 0.8 (0.6 to 1.1)  | 50.7 (21.6 to 85.7)   | 129 (107 to 160)          | 29.6 (24.8 to 36.1)      | 36.6 (10.9 to 65.8)   |
|            |               | Male   | 3 (2 to 4)           | 1.7 (1.2 to 2.3)  | 45.7 (16 to 81.9)     | 119 (98 to 148)           | 62.9 (52.3 to 76.8)      | 32.4 (6.8 to 62.1)    |
|            |               | Female | 0 (0 to 0)           | 0.1 (0.1 to 0.2)  | 43.9 (14.4 to 82.8)   | 10 (8 to 12)              | 4.2 (3.4 to 5.2)         | 26.6 (0 to 61.5)      |
| Cambodia   | TBL cancer    | Both   | 650 (420 to 907)     | 5.4 (3.6 to 7.6)  | 6 (-16.1 to 33.9)     | 75400 (58300 to 93400)    | 601.4 (470.8 to 744.1)   | 4.8 (-14.2 to 25.3)   |
|            |               | Male   | 465 (296 to 669)     | 9.6 (6.2 to 13.9) | 3.3 (-20.8 to 34.4)   | 54400 (41800 to 68900)    | 1052.8 (810.3 to 1344.7) | 1.9 (-17 to 23.1)     |
|            |               | Female | 184 (114 to 265)     | 2.6 (1.6 to 3.7)  | 15.5 (-16.6 to 59.2)  | 21000 (16000 to 27000)    | 288.1 (219.8 to 369.4)   | 14 (-8.3 to 39.7)     |
|            | Larynx cancer | Both   | 112 (73 to 163)      | 0.9 (0.6 to 1.3)  | 14.7 (-9 to 42.5)     | 4740 (3530 to 6240)       | 37.7 (28.2 to 49.2)      | 5.1 (-15 to 27.7)     |
|            |               | Male   | 89 (57 to 136)       | 1.8 (1.1 to 2.7)  | 18.4 (-9.3 to 53.2)   | 3870 (2810 to 5200)       | 74.1 (54 to 99.5)        | 8.1 (-12.7 to 32.8)   |
|            |               | Female | 22 (15 to 32)        | 0.3 (0.2 to 0.4)  | 2.6 (-16.1 to 27.4)   | 870 (651 to 1130)         | 12 (9 to 15.4)           | -6.8 (-26 to 19.5)    |
| Cameroon   | TBL cancer    | Both   | 362 (217 to 558)     | 3.1 (1.9 to 4.6)  | 2.9 (-23.3 to 35.2)   | 41900 (29600 to 58600)    | 329.5 (236.3 to 454.2)   | 0 (-21.5 to 25.1)     |
|            |               | Male   | 253 (152 to 398)     | 4.5 (2.7 to 6.9)  | -1.7 (-28.3 to 36)    | 29400 (21000 to 40700)    | 485.7 (348.7 to 661.9)   | -4.5 (-25 to 21.1)    |
|            |               | Female | 109 (63 to 174)      | 1.8 (1 to 2.8)    | 16.1 (-20.6 to 70.4)  | 12500 (8220 to 18300)     | 183.6 (124.9 to 266)     | 13.7 (-11.7 to 44.4)  |
|            | Larynx cancer | Both   | 99 (61 to 145)       | 0.8 (0.5 to 1.2)  | -3.7 (-26.9 to 25.9)  | 4970 (3490 to 6870)       | 38.5 (28 to 52.7)        | -9 (-28.8 to 18.4)    |
|            |               | Male   | 89 (55 to 133)       | 1.5 (0.9 to 2.2)  | -2.9 (-26.5 to 27.9)  | 4550 (3190 to 6300)       | 72.7 (51.9 to 98.9)      | -8.1 (-28.6 to 19.7)  |
|            |               | Female | 9 (6 to 14)          | 0.1 (0.1 to 0.2)  | -5.8 (-29.3 to 22.9)  | 422 (292 to 595)          | 6.3 (4.4 to 8.7)         | -12.1 (-34.1 to 16.8) |
| Canada     | TBL cancer    | Both   | 7740 (5130 to 10900) | 11.3 (7.4 to 16)  | -10.1 (-31.2 to 18)   | 471000 (441000 to 498000) | 705.3 (663.3 to 743.6)   | -11.9 (-16.5 to -7.1) |
|            |               | Male   | 3970 (2600 to 5770)  | 12.2 (8 to 17.7)  | -13.3 (-35.8 to 16.8) | 254000 (236000 to 270000) | 794.8 (742.2 to 846.4)   | -14.6 (-19.7 to -8.9) |
|            |               | Female | 3770 (2520 to 5290)  | 10.6 (7 to 15)    | -7.3 (-32.3 to 23.9)  | 218000 (197000 to 236000) | 629.1 (570.2 to 680.1)   | -9.1 (-17 to -1.7)    |
|            | Larynx cancer | Both   | 1010 (664 to 1460)   | 1.6 (1 to 2.2)    | -5.7 (-28.4 to 20.8)  | 10300 (9270 to 11300)     | 15.7 (14.2 to 17.2)      | -10.7 (-19.1 to -1.7) |
|            |               | Male   | 809 (523 to 1190)    | 2.6 (1.7 to 3.8)  | -6.1 (-31 to 24)      | 8550 (7610 to 9490)       | 27.4 (24.5 to 30.2)      | -11 (-20.6 to -1.4)   |
|            |               | Female | 204 (134 to 300)     | 0.6 (0.4 to 0.9)  | -7.1 (-28 to 20.1)    | 1730 (1470 to 2090)       | 5.1 (4.4 to 6.2)         | -12.9 (-24.7 to 1.8)  |

|                          |               |        |                           |                   |                      |                                 |                          |                       |
|--------------------------|---------------|--------|---------------------------|-------------------|----------------------|---------------------------------|--------------------------|-----------------------|
| Central African Republic | TBL cancer    | Both   | 67 (30 to 130)            | 2.8 (1.4 to 5.3)  | -8.1 (-31.6 to 21.6) | 8770 (4260 to 15600)            | 341.1 (176.6 to 591.3)   | -9.2 (-27.1 to 12.6)  |
|                          |               | Male   | 55 (21 to 112)            | 5.2 (2.3 to 10.2) | -9.3 (-34.7 to 25.6) | 7350 (3120 to 13900)            | 622.3 (292.5 to 1136.1)  | -10.7 (-27.1 to 9.6)  |
|                          |               | Female | 12 (7 to 19)              | 1 (0.6 to 1.6)    | -2.2 (-26 to 27)     | 1420 (967 to 2020)              | 107.1 (73.8 to 149.4)    | -2.4 (-26.6 to 27.7)  |
|                          | Larynx cancer | Both   | 21 (13 to 31)             | 0.8 (0.5 to 1.2)  | -8.2 (-25.3 to 13.2) | 1290 (900 to 1810)              | 48.7 (34.9 to 66.6)      | -9.4 (-27.6 to 11.4)  |
|                          |               | Male   | 17 (10 to 26)             | 1.6 (1 to 2.3)    | -8 (-24.8 to 14.9)   | 1100 (746 to 1550)              | 90.3 (64.7 to 123.2)     | -9.4 (-28.4 to 11.8)  |
|                          |               | Female | 3 (2 to 5)                | 0.3 (0.1 to 0.4)  | -9.5 (-32.1 to 19)   | 191 (126 to 280)                | 13.5 (9 to 19.6)         | -11.1 (-34.7 to 18.9) |
| Chad                     | TBL cancer    | Both   | 143 (86 to 223)           | 2.6 (1.6 to 4)    | 3.9 (-21.4 to 39.1)  | 16500 (11600 to 23600)          | 281.8 (201 to 402.2)     | 2.5 (-16.6 to 26.7)   |
|                          |               | Male   | 115 (66 to 187)           | 3.9 (2.2 to 6.3)  | -0.8 (-27.2 to 40.4) | 13200 (9150 to 19700)           | 421.7 (295.1 to 629.8)   | -1.9 (-20.7 to 22.5)  |
|                          |               | Female | 28 (17 to 44)             | 1.1 (0.7 to 1.7)  | 14.7 (-17 to 61)     | 3250 (2260 to 4870)             | 113.7 (79.8 to 169.1)    | 14.1 (-7 to 43.7)     |
|                          | Larynx cancer | Both   | 37 (23 to 53)             | 0.6 (0.4 to 0.9)  | -1.9 (-21.4 to 24.4) | 1920 (1430 to 2490)             | 32.6 (24.5 to 41.6)      | -5.2 (-23.5 to 18.4)  |
|                          |               | Male   | 33 (21 to 48)             | 1.1 (0.7 to 1.6)  | -4.1 (-24.4 to 23.1) | 1730 (1280 to 2260)             | 54.2 (40.2 to 69.9)      | -7.1 (-26.1 to 17.9)  |
|                          |               | Female | 4 (2 to 6)                | 0.1 (0.1 to 0.2)  | -4.1 (-24.4 to 19.8) | 193 (142 to 260)                | 6.8 (5 to 9)             | -7.4 (-27.6 to 18.9)  |
| Chile                    | TBL cancer    | Both   | 930 (604 to 1330)         | 3.8 (2.5 to 5.5)  | -3.4 (-28.7 to 28.2) | 82700 (77200 to 87900)          | 343.4 (320.5 to 364.7)   | -6.8 (-13.1 to -0.7)  |
|                          |               | Male   | 538 (339 to 790)          | 4.9 (3.1 to 7.2)  | -9 (-36.2 to 23.9)   | 49300 (45700 to 52900)          | 447.6 (415.3 to 480.2)   | -12.2 (-18.8 to -5.1) |
|                          |               | Female | 392 (251 to 564)          | 3 (1.9 to 4.2)    | 5.8 (-24 to 51.3)    | 33400 (30500 to 36200)          | 256.1 (234 to 277.2)     | 2.8 (-6.4 to 12.4)    |
|                          | Larynx cancer | Both   | 196 (128 to 279)          | 0.8 (0.5 to 1.2)  | -1.7 (-26 to 26.8)   | 3720 (3380 to 4100)             | 15.4 (14 to 17)          | -15.2 (-23.9 to -6)   |
|                          |               | Male   | 166 (109 to 237)          | 1.5 (1 to 2.2)    | -1.6 (-28.6 to 29.9) | 3210 (2880 to 3590)             | 29.1 (26.2 to 32.5)      | -15.4 (-24.8 to -4.9) |
|                          |               | Female | 29 (19 to 42)             | 0.2 (0.1 to 0.3)  | -2.3 (-24.9 to 26.2) | 511 (438 to 594)                | 3.9 (3.4 to 4.6)         | -13.9 (-25.2 to 0.6)  |
| China                    | TBL cancer    | Both   | 199000 (139000 to 264000) | 9.8 (6.9 to 13)   | 2.9 (-15.5 to 24.2)  | 16900000 (14100000 to 20000000) | 821.4 (688.6 to 970.5)   | -5.4 (-21.8 to 14.4)  |
|                          |               | Male   | 138000 (94600 to 189000)  | 14.5 (10 to 19.6) | 1.7 (-19.8 to 30.2)  | 11800000 (9260000 to 14800000)  | 1189.3 (935.9 to 1481.5) | -6.5 (-27.7 to 19)    |
|                          |               | Female | 60900 (40600 to 82900)    | 5.8 (3.9 to 7.9)  | 6.8 (-15.8 to 33.7)  | 5100000 (4080000 to 6290000)    | 486.3 (389.2 to 597.9)   | -1.8 (-23.5 to 23.5)  |



|              |               |        |                        |                    |                       |                           |                          |                       |
|--------------|---------------|--------|------------------------|--------------------|-----------------------|---------------------------|--------------------------|-----------------------|
|              | Larynx cancer | Both   | 26800 (18500 to 36900) | 1.3 (0.9 to 1.8)   | 14.3 (-6.1 to 40.7)   | 471000 (386000 to 574000) | 22.6 (18.6 to 27.4)      | -9.7 (-27.2 to 11.2)  |
|              |               | Male   | 22400 (15200 to 31600) | 2.2 (1.5 to 3.1)   | 18.1 (-5.9 to 49.9)   | 399000 (315000 to 497000) | 39.3 (31.4 to 48.7)      | -7.1 (-27.9 to 16.1)  |
|              |               | Female | 4410 (2940 to 6060)    | 0.4 (0.3 to 0.6)   | 1.4 (-16.1 to 21.6)   | 72000 (57000 to 88100)    | 6.9 (5.5 to 8.4)         | -19.1 (-37.2 to 0.2)  |
| Colombia     | TBL cancer    | Both   | 1510 (962 to 2200)     | 2.9 (1.8 to 4.1)   | -3.8 (-30.6 to 29.5)  | 135000 (105000 to 174000) | 256.3 (199.5 to 330.3)   | -9.4 (-30.1 to 17.4)  |
|              |               | Male   | 768 (468 to 1120)      | 3.2 (2 to 4.7)     | -13.6 (-41.9 to 23.6) | 72800 (55300 to 95800)    | 303.8 (231.2 to 399.7)   | -18 (-38.2 to 8.4)    |
|              |               | Female | 738 (473 to 1080)      | 2.6 (1.6 to 3.8)   | 10 (-22.4 to 58.3)    | 61800 (48500 to 79300)    | 216.8 (170.1 to 277.7)   | 4.5 (-18.5 to 33)     |
|              | Larynx cancer | Both   | 416 (274 to 593)       | 0.8 (0.5 to 1.1)   | -6 (-29.4 to 23)      | 11400 (8540 to 14900)     | 21.6 (16.2 to 28.4)      | -17.6 (-39.2 to 6.9)  |
|              |               | Male   | 303 (194 to 443)       | 1.3 (0.8 to 1.8)   | -6.9 (-33.3 to 24.7)  | 8940 (6660 to 11800)      | 37.2 (27.7 to 49.2)      | -18.1 (-39.9 to 8.9)  |
|              |               | Female | 113 (75 to 166)        | 0.4 (0.3 to 0.6)   | -0.1 (-22.6 to 26.6)  | 2470 (1840 to 3520)       | 8.6 (6.4 to 12.3)        | -12.3 (-33.2 to 11.6) |
| Comoros      | TBL cancer    | Both   | 8 (5 to 13)            | 1.7 (1.1 to 2.6)   | 4.9 (-20.9 to 39)     | 913 (655 to 1250)         | 180.9 (131.3 to 243.3)   | 6.5 (-14.6 to 29.8)   |
|              |               | Male   | 5 (3 to 9)             | 2.4 (1.4 to 3.9)   | 1.8 (-29 to 40.5)     | 580 (402 to 847)          | 254.4 (181 to 366)       | 2.6 (-18.4 to 26)     |
|              |               | Female | 3 (2 to 4)             | 1.1 (0.7 to 1.7)   | 11.8 (-22.7 to 52.8)  | 332 (230 to 437)          | 120.9 (84.5 to 158.3)    | 14.5 (-11.6 to 43.7)  |
|              | Larynx cancer | Both   | 3 (2 to 4)             | 0.5 (0.3 to 0.8)   | 2.3 (-19.4 to 29.6)   | 138 (98 to 188)           | 26.3 (19.1 to 35.3)      | 1.5 (-22.5 to 29.7)   |
|              |               | Male   | 2 (1 to 3)             | 0.8 (0.5 to 1.3)   | 2.8 (-21.8 to 34.5)   | 101 (70 to 140)           | 41.3 (29.5 to 56.8)      | 1.8 (-23.4 to 31.7)   |
|              |               | Female | 1 (0 to 1)             | 0.3 (0.2 to 0.4)   | -0.5 (-22.9 to 28.8)  | 37 (27 to 51)             | 13.3 (9.6 to 17.8)       | -1.8 (-26.7 to 31.2)  |
| Congo        | TBL cancer    | Both   | 97 (57 to 154)         | 3.6 (2.2 to 5.6)   | 5.6 (-20.7 to 39.2)   | 11800 (8000 to 17300)     | 403.3 (286.5 to 577.6)   | 4.1 (-17.2 to 30.9)   |
|              |               | Male   | 66 (39 to 107)         | 5.2 (3.2 to 8.1)   | -0.3 (-25.2 to 36.7)  | 8120 (5710 to 11800)      | 577.3 (425.2 to 821.9)   | -1.1 (-20.3 to 24.3)  |
|              |               | Female | 31 (16 to 51)          | 2.2 (1.1 to 3.5)   | 12.8 (-24.9 to 60.4)  | 3650 (2180 to 5740)       | 241.9 (148.9 to 369.7)   | 10.2 (-16.5 to 42.8)  |
|              | Larynx cancer | Both   | 21 (14 to 31)          | 0.8 (0.5 to 1.1)   | 0.2 (-18.9 to 24.2)   | 1120 (826 to 1490)        | 37.8 (28.7 to 49.2)      | -4.3 (-23.8 to 20.4)  |
|              |               | Male   | 18 (12 to 25)          | 1.3 (0.9 to 1.9)   | -1.1 (-22 to 24.1)    | 934 (684 to 1260)         | 65.3 (49.7 to 86)        | -5.1 (-24.9 to 19.7)  |
|              |               | Female | 4 (2 to 6)             | 0.3 (0.2 to 0.4)   | -9.7 (-31 to 18.2)    | 190 (130 to 266)          | 12 (8.5 to 16.7)         | -15 (-37.1 to 13.4)   |
| Cook Islands | TBL cancer    | Both   | 2 (1 to 2)             | 6.4 (4.4 to 8.7)   | -0.9 (-20.6 to 21.4)  | 164 (138 to 194)          | 661.6 (557.5 to 790.9)   | -1.8 (-16.5 to 14.7)  |
|              |               | Male   | 1 (1 to 2)             | 10.6 (7.4 to 14.4) | -1.4 (-22.3 to 25.1)  | 134 (113 to 159)          | 1104.8 (928.1 to 1317.9) | -1.9 (-17.3 to 16)    |
|              |               | Female | 0 (0 to 0)             | 2.5 (1.5 to 3.6)   | 7.4 (-22.1 to 50.5)   | 30 (23 to 38)             | 238 (185.4 to 304.4)     | 5.5 (-15.9 to 32.6)   |
|              | Larynx cancer | Both   | 0 (0 to 0)             | 0.5 (0.3 to 0.7)   | -7.2 (-24.6 to 14)    | 3 (2 to 3)                | 10.7 (8.7 to 13.3)       | -16.8 (-30.8 to 0.1)  |
|              |               | Male   | 0 (0 to 0)             | 0.8 (0.6 to 1.2)   | -5.8 (-25.3 to 19.1)  | 2 (2 to 3)                | 18.7 (15.2 to 23.4)      | -15.7 (-30.7 to 3)    |
|              |               | Female | 0 (0 to 0)             | 0.1 (0.1 to 0.2)   | -3.9 (-23.9 to 24.5)  | 0 (0 to 1)                | 3.3 (2.4 to 4.3)         | -12.9 (-33.9 to 16)   |

|            |               |        |                     |                     |                       |                           |                          |                       |
|------------|---------------|--------|---------------------|---------------------|-----------------------|---------------------------|--------------------------|-----------------------|
| Costa Rica | TBL cancer    | Both   | 119 (75 to 173)     | 2.3 (1.5 to 3.4)    | -3.8 (-29.2 to 28.6)  | 10400 (8040 to 13300)     | 202.5 (156.1 to 258.2)   | -7.3 (-28.9 to 19)    |
|            |               | Male   | 72 (44 to 108)      | 3.1 (1.9 to 4.6)    | -7.4 (-35 to 32.6)    | 6760 (5130 to 8660)       | 283.4 (215.9 to 361.8)   | -9.7 (-31.1 to 17.2)  |
|            |               | Female | 47 (29 to 68)       | 1.7 (1.1 to 2.5)    | 4.4 (-27.1 to 44.2)   | 3670 (2820 to 4680)       | 133 (102.3 to 169.3)     | -0.1 (-22.6 to 27.6)  |
|            | Larynx cancer | Both   | 46 (30 to 66)       | 0.9 (0.6 to 1.3)    | -4.6 (-28.2 to 24.6)  | 1190 (901 to 1550)        | 23.1 (17.5 to 29.8)      | -12.4 (-33.7 to 12.9) |
|            |               | Male   | 39 (25 to 56)       | 1.6 (1.1 to 2.4)    | -2.7 (-28.5 to 29.3)  | 1070 (799 to 1380)        | 44.7 (33.5 to 57.8)      | -10.4 (-32.6 to 16.5) |
|            |               | Female | 7 (5 to 10)         | 0.2 (0.2 to 0.3)    | -5.2 (-22.8 to 17.7)  | 125 (95 to 163)           | 4.5 (3.4 to 5.9)         | -14.3 (-34.5 to 11.4) |
| Croatia    | TBL cancer    | Both   | 836 (552 to 1170)   | 10 (6.6 to 14.2)    | -11.9 (-33.4 to 14.3) | 64100 (50100 to 81400)    | 801.1 (623.6 to 1025.5)  | -17.3 (-35.7 to 6.5)  |
|            |               | Male   | 605 (406 to 861)    | 16.2 (10.8 to 23.1) | -16 (-37.8 to 8.2)    | 48400 (37500 to 61200)    | 1316.2 (1017 to 1664.8)  | -20.6 (-39 to 1.8)    |
|            |               | Female | 231 (150 to 334)    | 5.1 (3.3 to 7.4)    | -4.5 (-32.8 to 33.5)  | 15700 (12100 to 20200)    | 369.1 (282 to 480.2)     | -10.2 (-31.7 to 18.2) |
|            | Larynx cancer | Both   | 187 (123 to 269)    | 2.4 (1.6 to 3.5)    | -9.1 (-32.5 to 21.3)  | 4480 (3440 to 5830)       | 57.4 (44 to 74.8)        | -18.3 (-38.3 to 7.8)  |
|            |               | Male   | 170 (111 to 247)    | 4.8 (3.1 to 6.9)    | -10.5 (-33.8 to 19.1) | 4220 (3220 to 5510)       | 117 (89 to 152.4)        | -19.4 (-39.1 to 6.2)  |
|            |               | Female | 16 (11 to 24)       | 0.4 (0.3 to 0.6)    | -10.4 (-31.5 to 17.8) | 260 (193 to 341)          | 6.2 (4.6 to 8.2)         | -22.5 (-42.5 to 5.1)  |
| Cuba       | TBL cancer    | Both   | 1560 (1060 to 2170) | 8.3 (5.6 to 11.6)   | 1.3 (-21 to 26.3)     | 141000 (114000 to 173000) | 756.7 (611.4 to 926.5)   | -2.4 (-20.9 to 19.1)  |
|            |               | Male   | 1000 (658 to 1390)  | 11.2 (7.4 to 15.6)  | 1.1 (-22.7 to 29.4)   | 89200 (71800 to 110000)   | 1005.1 (806.8 to 1237.9) | -2.9 (-21.5 to 18.5)  |
|            |               | Female | 562 (369 to 800)    | 5.7 (3.7 to 8.1)    | 3 (-26.5 to 41.9)     | 51800 (41700 to 63500)    | 534.3 (431 to 655.8)     | -0.5 (-20.1 to 21.3)  |
|            | Larynx cancer | Both   | 791 (526 to 1120)   | 4.2 (2.8 to 6)      | 8.1 (-18 to 42.5)     | 22200 (17700 to 27600)    | 118.9 (94.6 to 148.1)    | -1.1 (-21.9 to 23)    |
|            |               | Male   | 680 (446 to 971)    | 7.6 (5 to 10.8)     | 10.2 (-19 to 49.3)    | 19700 (15600 to 24600)    | 220.7 (175.2 to 275.3)   | 0.6 (-20.8 to 25.5)   |
|            |               | Female | 111 (73 to 157)     | 1.2 (0.8 to 1.6)    | 2.1 (-20.7 to 30.6)   | 2510 (1990 to 3150)       | 25.9 (20.4 to 32.6)      | -7.5 (-27.1 to 16.5)  |
| Cyprus     | TBL cancer    | Both   | 124 (88 to 168)     | 6.3 (4.5 to 8.5)    | -6.2 (-24.4 to 15)    | 9550 (8390 to 10800)      | 490.2 (431.8 to 555.1)   | -8.7 (-20.3 to 3.3)   |
|            |               | Male   | 95 (66 to 130)      | 10.1 (7 to 13.7)    | -10.6 (-30.7 to 14.6) | 7400 (6440 to 8460)       | 786.8 (685.8 to 899.8)   | -12 (-23.7 to 1.5)    |
|            |               | Female | 29 (19 to 42)       | 2.9 (2 to 4.1)      | -0.1 (-26.2 to 31.8)  | 2150 (1820 to 2490)       | 216.3 (183.8 to 250.7)   | -3.7 (-19 to 11.5)    |
|            | Larynx cancer | Both   | 27 (18 to 37)       | 1.4 (1 to 1.9)      | -5.4 (-23.6 to 18.8)  | 331 (279 to 390)          | 17.3 (14.6 to 20.3)      | -17.2 (-30 to -0.7)   |
|            |               | Male   | 23 (16 to 33)       | 2.5 (1.7 to 3.6)    | -7.3 (-27.4 to 20)    | 302 (252 to 360)          | 33 (27.6 to 39)          | -18.9 (-32.2 to -1.8) |
|            |               | Female | 3 (2 to 5)          | 0.4 (0.2 to 0.5)    | -6.6 (-17.6 to 6.6)   | 29 (24 to 36)             | 3 (2.5 to 3.7)           | -19.6 (-34 to -1.4)   |

|                                  |               |        |                     |                    |                       |                           |                          |                       |
|----------------------------------|---------------|--------|---------------------|--------------------|-----------------------|---------------------------|--------------------------|-----------------------|
| Czechia                          | TBL cancer    | Both   | 1600 (1070 to 2220) | 7.7 (5.2 to 10.7)  | -16.3 (-34.8 to 8.7)  | 132000 (107000 to 162000) | 656.7 (533.2 to 807.8)   | -20 (-35.6 to -1.6)   |
|                                  |               | Male   | 1070 (721 to 1490)  | 11.4 (7.7 to 15.8) | -22 (-40.9 to 2.3)    | 90900 (74000 to 112000)   | 978.6 (794 to 1206.8)    | -25.3 (-39.7 to -7.6) |
|                                  |               | Female | 533 (338 to 755)    | 4.8 (3.1 to 6.8)   | -5.3 (-31.8 to 31.4)  | 41000 (33000 to 50400)    | 384.9 (309 to 476.6)     | -8.8 (-26.8 to 13.6)  |
|                                  | Larynx cancer | Both   | 303 (204 to 437)    | 1.6 (1.1 to 2.4)   | -9.2 (-31.7 to 18.8)  | 6460 (5160 to 8040)       | 35.2 (27.9 to 44.1)      | -18.7 (-35.5 to 2.6)  |
|                                  |               | Male   | 261 (172 to 376)    | 3 (2 to 4.3)       | -12.8 (-35.3 to 16.1) | 5900 (4690 to 7340)       | 67.5 (53.3 to 84.3)      | -21.3 (-37.9 to -0.7) |
|                                  |               | Female | 42 (27 to 62)       | 0.5 (0.3 to 0.7)   | 4.7 (-21.6 to 42.5)   | 555 (406 to 712)          | 5.7 (4.2 to 7.3)         | -4 (-25.8 to 24.4)    |
| Côte d'Ivoire                    | TBL cancer    | Both   | 297 (192 to 434)    | 2.9 (1.8 to 4.2)   | 1.4 (-24.3 to 34.2)   | 34800 (25200 to 45900)    | 306.5 (225.7 to 393.8)   | 0.3 (-20.7 to 27.3)   |
|                                  |               | Male   | 227 (142 to 342)    | 4.3 (2.7 to 6.4)   | -2.6 (-29.4 to 35)    | 26600 (19000 to 35100)    | 454.8 (331.1 to 592.8)   | -4 (-24 to 23.5)      |
|                                  |               | Female | 70 (44 to 103)      | 1.4 (0.9 to 2)     | 14 (-19.9 to 63.5)    | 8160 (5940 to 10700)      | 144.8 (110.2 to 185.3)   | 14.6 (-11.9 to 48.2)  |
|                                  | Larynx cancer | Both   | 82 (52 to 117)      | 0.7 (0.5 to 1.1)   | -6.6 (-27.1 to 22)    | 4260 (3090 to 5600)       | 36.6 (27 to 47.1)        | -9.5 (-29.4 to 16.2)  |
|                                  |               | Male   | 76 (48 to 109)      | 1.3 (0.9 to 1.9)   | -7.2 (-28.9 to 22.7)  | 3960 (2840 to 5230)       | 64.9 (47.4 to 83.7)      | -10.2 (-30.2 to 15.8) |
|                                  |               | Female | 6 (4 to 9)          | 0.1 (0.1 to 0.2)   | -6.5 (-29 to 21.8)    | 302 (216 to 405)          | 5.4 (4 to 7.2)           | -9.7 (-32.3 to 19.1)  |
| North Korea                      | TBL cancer    | Both   | 2080 (1350 to 2990) | 6.4 (4.2 to 9.1)   | -1.9 (-21 to 23)      | 233000 (176000 to 304000) | 705.9 (535 to 912.1)     | -3.2 (-18 to 14.8)    |
|                                  |               | Male   | 1400 (848 to 2100)  | 10.3 (6.5 to 15.4) | -6.9 (-28.5 to 22)    | 160000 (113000 to 219000) | 1116.6 (807.6 to 1500.4) | -7.7 (-22.1 to 9.8)   |
|                                  |               | Female | 685 (413 to 996)    | 3.7 (2.2 to 5.3)   | 2.2 (-24.4 to 35.2)   | 73000 (51700 to 97800)    | 399.4 (279.2 to 540.6)   | 0.9 (-20.4 to 24.6)   |
|                                  | Larynx cancer | Both   | 249 (163 to 362)    | 0.8 (0.5 to 1.1)   | -2.5 (-19.9 to 17.7)  | 8620 (6600 to 11100)      | 25.7 (19.8 to 32.9)      | -8.4 (-25.3 to 9.9)   |
|                                  |               | Male   | 203 (132 to 298)    | 1.4 (0.9 to 2.1)   | -4.9 (-23.2 to 16.2)  | 7050 (5240 to 9270)       | 47.3 (36.3 to 61.3)      | -10.5 (-27 to 7.9)    |
|                                  |               | Female | 46 (29 to 69)       | 0.3 (0.2 to 0.4)   | -7.7 (-24.9 to 16.4)  | 1570 (1140 to 2150)       | 8.6 (6.2 to 11.8)        | -13 (-31.8 to 11.7)   |
| Democratic Republic of the Congo | TBL cancer    | Both   | 989 (459 to 2130)   | 2.7 (1.2 to 5.6)   | 7 (-19.4 to 48.2)     | 121000 (64700 to 245000)  | 304.3 (161.3 to 612.7)   | 7.8 (-12.6 to 39.9)   |
|                                  |               | Male   | 757 (303 to 1870)   | 4.6 (1.9 to 11)    | 0.4 (-26.8 to 54.9)   | 94300 (44900 to 218000)   | 519.9 (251.3 to 1184.4)  | 0.1 (-18.3 to 31.5)   |
|                                  |               | Female | 232 (131 to 380)    | 1.2 (0.6 to 2)     | 22.1 (-13.1 to 74.3)  | 26700 (16800 to 40200)    | 126.9 (79.5 to 193.1)    | 28.4 (-2.7 to 73.1)   |
|                                  | Larynx cancer | Both   | 224 (143 to 324)    | 0.6 (0.4 to 0.8)   | -1.5 (-21.9 to 23.6)  | 12100 (8910 to 16300)     | 29.8 (22.2 to 39.4)      | -4.5 (-24.6 to 20.4)  |

|                    |               |        |                    |                    |                      |                        |                        |                        |
|--------------------|---------------|--------|--------------------|--------------------|----------------------|------------------------|------------------------|------------------------|
|                    |               | Male   | 183 (114 to 271)   | 1.1 (0.7 to 1.6)   | -2.9 (-25 to 23.3)   | 9970 (7100 to 13800)   | 54 (39.2 to 72.2)      | -5.9 (-27.1 to 20.8)   |
|                    |               | Female | 41 (26 to 60)      | 0.2 (0.1 to 0.3)   | -5.8 (-26.2 to 20.1) | 2150 (1550 to 2910)    | 9.8 (7.1 to 13.2)      | -9.6 (-30.6 to 17.5)   |
| Denmark            | TBL cancer    | Both   | 1180 (796 to 1660) | 10.5 (7 to 14.8)   | -20.9 (-39.8 to 2.1) | 84500 (78400 to 91300) | 776.1 (722 to 836)     | -17.3 (-23 to -11.7)   |
|                    |               | Male   | 609 (397 to 871)   | 11.3 (7.3 to 16.2) | -25 (-44.6 to 0.7)   | 43900 (40600 to 47400) | 834.2 (772.3 to 899.2) | -21.5 (-27.6 to -15.5) |
|                    |               | Female | 571 (378 to 812)   | 9.9 (6.5 to 14.1)  | -16.8 (-38.9 to 9)   | 40600 (36500 to 44900) | 729.3 (657.4 to 802)   | -12.8 (-21 to -4.3)    |
|                    | Larynx cancer | Both   | 178 (114 to 262)   | 1.7 (1.1 to 2.6)   | -11.3 (-32.7 to 19)  | 2190 (1980 to 2410)    | 21.4 (19.4 to 23.6)    | -22.1 (-30 to -13)     |
|                    |               | Male   | 143 (91 to 211)    | 2.9 (1.8 to 4.2)   | -12.7 (-35.8 to 20)  | 1780 (1580 to 1990)    | 36.1 (32.1 to 40.2)    | -23.4 (-32.3 to -13.6) |
|                    |               | Female | 34 (23 to 50)      | 0.7 (0.5 to 1)     | -9.3 (-30.8 to 19.1) | 405 (340 to 482)       | 7.6 (6.4 to 9.1)       | -18.8 (-30.5 to -5.4)  |
| Djibouti           | TBL cancer    | Both   | 15 (7 to 26)       | 2.4 (1.3 to 4.3)   | 5.6 (-24 to 43.5)    | 1730 (1050 to 2940)    | 264 (168.7 to 441.2)   | 4.5 (-18 to 30.4)      |
|                    |               | Male   | 11 (5 to 22)       | 3.5 (1.7 to 6.7)   | 1.6 (-31.6 to 41.8)  | 1310 (752 to 2420)     | 375.8 (224.6 to 670.2) | 0.3 (-21.6 to 25.8)    |
|                    |               | Female | 3 (2 to 5)         | 1.2 (0.7 to 1.9)   | 12.8 (-23.9 to 66.6) | 415 (284 to 600)       | 132.2 (94.4 to 186.1)  | 14.2 (-12.8 to 47.5)   |
|                    | Larynx cancer | Both   | 5 (3 to 8)         | 0.7 (0.5 to 1.1)   | -4.1 (-25.1 to 23.9) | 259 (175 to 378)       | 35.4 (25 to 51.3)      | -10.1 (-31 to 15.8)    |
|                    |               | Male   | 4 (2 to 7)         | 1.1 (0.7 to 1.8)   | -5.5 (-27.2 to 22.9) | 216 (142 to 319)       | 54.1 (36.9 to 79.7)    | -10.9 (-31.5 to 15.1)  |
|                    |               | Female | 1 (1 to 1)         | 0.3 (0.2 to 0.4)   | -2.9 (-25.7 to 29.8) | 44 (28 to 65)          | 12.8 (8.6 to 18.3)     | -9.3 (-33.9 to 25.4)   |
| Dominica           | TBL cancer    | Both   | 3 (2 to 5)         | 3.8 (2.5 to 5.4)   | 2.1 (-21.3 to 33.1)  | 354 (283 to 435)       | 398.4 (319 to 490.9)   | 2.2 (-15.4 to 24.5)    |
|                    |               | Male   | 2 (2 to 3)         | 5.4 (3.5 to 7.7)   | -1.4 (-26.9 to 35.1) | 251 (199 to 313)       | 563.2 (446.7 to 696.1) | -0.5 (-20.4 to 24.2)   |
|                    |               | Female | 1 (1 to 2)         | 2.3 (1.4 to 3.3)   | 6 (-25.8 to 48.5)    | 102 (81 to 127)        | 233.1 (183 to 291)     | 6 (-14.8 to 31.5)      |
|                    | Larynx cancer | Both   | 1 (1 to 2)         | 1.4 (0.9 to 2)     | 2.7 (-20.8 to 31.7)  | 51 (39 to 63)          | 56.5 (43.9 to 70.8)    | 4.5 (-16 to 31.1)      |
|                    |               | Male   | 1 (1 to 2)         | 2.3 (1.5 to 3.4)   | 1.5 (-23.6 to 31.9)  | 45 (34 to 56)          | 98.9 (75.9 to 125.2)   | 3.5 (-18.2 to 32.8)    |
|                    |               | Female | 0 (0 to 0)         | 0.4 (0.3 to 0.5)   | -1.7 (-24.7 to 25.7) | 6 (5 to 7)             | 13.1 (10.3 to 16.7)    | -0.1 (-19.8 to 26.4)   |
| Dominican Republic | TBL cancer    | Both   | 327 (202 to 494)   | 3.5 (2.2 to 5.3)   | 12.6 (-23.3 to 67)   | 34700 (24400 to 47600) | 363.7 (257.6 to 496.7) | 14.5 (-20.7 to 62.9)   |
|                    |               | Male   | 213 (128 to 332)   | 4.8 (2.9 to 7.4)   | 15.7 (-27.6 to 76.9) | 22700 (15700 to 31100) | 490.3 (344 to 672.2)   | 18.4 (-19.7 to 69.4)   |
|                    |               | Female | 114 (69 to 181)    | 2.4 (1.4 to 3.7)   | 8.2 (-32.3 to 67.8)  | 12100 (8020 to 16900)  | 244.8 (163.3 to 342.4) | 8.7 (-26 to 54.3)      |
|                    | Larynx cancer | Both   | 113 (73 to 164)    | 1.2 (0.8 to 1.7)   | 25.6 (-11.4 to 77.4) | 4700 (3490 to 6220)    | 48.9 (36.5 to 64.6)    | 25.8 (-11.4 to 77.1)   |
|                    |               | Male   | 90 (57 to 134)     | 2 (1.2 to 2.9)     | 29.7 (-11.5 to 87.6) | 3880 (2850 to 5240)    | 83.3 (61.8 to 112)     | 30 (-9.2 to 86.4)      |
|                    |               | Female | 23 (15 to 33)      | 0.5 (0.3 to 0.7)   | 15 (-15.7 to 56.4)   | 812 (599 to 1090)      | 16.4 (12.2 to 22.1)    | 13.1 (-19.7 to 58.5)   |
| Ecuador            | TBL cancer    | Both   | 339 (221 to 482)   | 2.3 (1.5 to 3.2)   | -3.6 (-29.8 to 29.8) | 33600 (26200 to 43300) | 219.5 (172 to 281.9)   | -6 (-27.7 to 20.9)     |

|                   |               |        |                    |                  |                      |                           |                        |                       |
|-------------------|---------------|--------|--------------------|------------------|----------------------|---------------------------|------------------------|-----------------------|
|                   |               | Male   | 187 (118 to 273)   | 2.7 (1.7 to 3.9) | -8.3 (-38 to 33)     | 18500 (14200 to 24300)    | 253.6 (195 to 329.4)   | -10.6 (-32.7 to 18.7) |
|                   |               | Female | 152 (99 to 216)    | 1.9 (1.3 to 2.8) | 3.2 (-25.9 to 45)    | 15100 (11800 to 19200)    | 188.7 (148.6 to 240)   | 0.7 (-22.3 to 29.4)   |
|                   | Larynx cancer | Both   | 67 (43 to 96)      | 0.4 (0.3 to 0.6) | 0.6 (-23.3 to 32.9)  | 2340 (1790 to 3070)       | 15.3 (11.8 to 20.1)    | -9.9 (-32 to 19.4)    |
|                   |               | Male   | 54 (34 to 77)      | 0.7 (0.5 to 1.1) | 1 (-25.2 to 36.7)    | 1890 (1430 to 2520)       | 25.9 (19.7 to 34.5)    | -9.5 (-32.8 to 22.2)  |
|                   |               | Female | 14 (9 to 20)       | 0.2 (0.1 to 0.3) | 2.6 (-21.1 to 33.1)  | 448 (340 to 583)          | 5.6 (4.2 to 7.3)       | -8.4 (-31.5 to 20.5)  |
| Egypt             | TBL cancer    | Both   | 1480 (859 to 2280) | 2.2 (1.3 to 3.3) | 5 (-27.3 to 48.3)    | 174000 (122000 to 237000) | 238.7 (167.9 to 324.4) | 4.3 (-21.3 to 35.9)   |
|                   |               | Male   | 1010 (557 to 1630) | 2.7 (1.5 to 4.3) | -1.2 (-36.9 to 44.9) | 120000 (83200 to 170000)  | 307.7 (211.6 to 433.7) | -1.7 (-27 to 29.3)    |
|                   |               | Female | 467 (266 to 747)   | 1.5 (0.8 to 2.5) | 20.4 (-19.8 to 68.1) | 53000 (34200 to 76100)    | 160.8 (102.1 to 230.9) | 20.3 (-12.5 to 62.1)  |
|                   | Larynx cancer | Both   | 499 (317 to 745)   | 0.7 (0.4 to 1)   | 1.3 (-24 to 31.9)    | 19800 (14500 to 26700)    | 26.5 (19.7 to 36.2)    | -9.4 (-31.7 to 19)    |
|                   |               | Male   | 402 (245 to 615)   | 1 (0.6 to 1.6)   | -0.6 (-27.8 to 34.4) | 16400 (11800 to 22600)    | 41.2 (29.7 to 58.1)    | -10.9 (-33.4 to 17.8) |
|                   |               | Female | 97 (64 to 144)     | 0.3 (0.2 to 0.4) | 5.8 (-19.8 to 35.2)  | 3420 (2450 to 4720)       | 9.6 (6.9 to 13.1)      | -4.9 (-31.1 to 26.8)  |
| El Salvador       | TBL cancer    | Both   | 144 (91 to 209)    | 2.4 (1.5 to 3.6) | 10.2 (-22.2 to 48.1) | 13900 (10400 to 18000)    | 237.7 (177.4 to 308.1) | 7.3 (-20.2 to 40)     |
|                   |               | Male   | 71 (44 to 105)     | 2.8 (1.8 to 4.2) | 8.1 (-26.2 to 51.8)  | 7130 (5300 to 9330)       | 285.3 (211.3 to 374)   | 6.9 (-22.3 to 41.4)   |
|                   |               | Female | 74 (45 to 110)     | 2.2 (1.3 to 3.2) | 13 (-25 to 59.6)     | 6810 (5030 to 8960)       | 202.3 (149.1 to 266.4) | 8.8 (-21.2 to 42.8)   |
|                   | Larynx cancer | Both   | 31 (20 to 45)      | 0.5 (0.3 to 0.8) | 8.8 (-19.6 to 42.7)  | 1050 (779 to 1390)        | 18 (13.3 to 23.8)      | 0.5 (-25.4 to 32.3)   |
|                   |               | Male   | 23 (15 to 34)      | 0.9 (0.6 to 1.4) | 14.4 (-18.8 to 54.1) | 835 (614 to 1110)         | 33.7 (24.7 to 45)      | 6 (-21.9 to 41.7)     |
|                   |               | Female | 7 (5 to 11)        | 0.2 (0.1 to 0.3) | 0.5 (-22 to 29)      | 217 (158 to 290)          | 6.4 (4.6 to 8.5)       | -9.6 (-33.7 to 19.9)  |
| Equatorial Guinea | TBL cancer    | Both   | 18 (10 to 29)      | 3.6 (2 to 5.8)   | 10.3 (-20.3 to 49.9) | 2080 (1270 to 3250)       | 397.3 (253.3 to 612.8) | 8.6 (-18.2 to 43.4)   |
|                   |               | Male   | 11 (6 to 18)       | 5.4 (3 to 8.8)   | 5.3 (-26 to 46.1)    | 1310 (773 to 2070)        | 598.3 (368.2 to 921)   | 4 (-18.9 to 33.3)     |
|                   |               | Female | 7 (4 to 11)        | 2.4 (1.3 to 4)   | 18.2 (-23.6 to 91.2) | 766 (435 to 1270)         | 254.3 (148.5 to 407.8) | 16.1 (-21.8 to 70.8)  |
|                   | Larynx cancer | Both   | 3 (2 to 5)         | 0.6 (0.4 to 1)   | 11.7 (-14.2 to 44.2) | 142 (92 to 221)           | 27.2 (18.3 to 42)      | 5.7 (-18.8 to 40.3)   |
|                   |               | Male   | 3 (2 to 4)         | 1.2 (0.7 to 1.9) | 15.1 (-12.2 to 50.5) | 116 (75 to 185)           | 53.8 (36 to 84.7)      | 9.5 (-15.9 to 43.8)   |
|                   |               | Female | 1 (0 to 1)         | 0.2 (0.1 to 0.3) | -4.7 (-30.2 to 32.5) | 26 (15 to 41)             | 8.2 (5.1 to 12.9)      | -12.3 (-37.9 to 27.3) |
| Eritrea           | TBL cancer    | Both   | 54 (35 to 79)      | 2 (1.3 to 2.8)   | 2.7 (-20.8 to 36.3)  | 6620 (4960 to 8810)       | 216.5 (166.5 to 277.6) | 1.9 (-17.4 to 24.2)   |

|          |               |        |                  |                    |                       |                        |                          |                       |
|----------|---------------|--------|------------------|--------------------|-----------------------|------------------------|--------------------------|-----------------------|
|          |               | Male   | 36 (23 to 54)    | 3.1 (2 to 4.8)     | -4 (-30.3 to 37.6)    | 4440 (3230 to 5940)    | 344 (256.8 to 443.9)     | -5.7 (-23.5 to 17.4)  |
|          |               | Female | 19 (11 to 29)    | 1.2 (0.7 to 1.8)   | 12.9 (-18.5 to 49.3)  | 2180 (1500 to 3090)    | 126.9 (88.5 to 177.8)    | 15 (-10.1 to 46)      |
|          | Larynx cancer | Both   | 23 (14 to 34)    | 0.7 (0.4 to 1.1)   | -4 (-21.7 to 19.1)    | 1320 (906 to 1840)     | 38.5 (27.2 to 53.1)      | -8.5 (-24.5 to 12.7)  |
|          |               | Male   | 16 (10 to 25)    | 1.2 (0.7 to 1.8)   | -7.6 (-26.1 to 17)    | 985 (657 to 1440)      | 64.7 (44.2 to 90.8)      | -12.1 (-28.7 to 9.5)  |
|          |               | Female | 6 (4 to 9)       | 0.4 (0.2 to 0.5)   | -0.6 (-22.7 to 25.8)  | 331 (223 to 476)       | 18 (12.4 to 25.3)        | -4.8 (-27.2 to 22.5)  |
| Estonia  | TBL cancer    | Both   | 163 (108 to 233) | 6.5 (4.3 to 9.4)   | -8.7 (-31.1 to 19.3)  | 14900 (11600 to 19000) | 627.8 (486.2 to 798.6)   | -11.8 (-31.9 to 11.6) |
|          |               | Male   | 112 (75 to 162)  | 11.4 (7.6 to 16.5) | -19.2 (-40.5 to 6.5)  | 10900 (8440 to 14000)  | 1120.4 (863.3 to 1430.5) | -20.5 (-38.7 to 0.7)  |
|          |               | Female | 51 (31 to 74)    | 3.3 (2 to 4.8)     | 14.4 (-20.7 to 63.7)  | 4000 (3070 to 5140)    | 282.3 (215.2 to 366.3)   | 9.7 (-16.6 to 41.4)   |
|          | Larynx cancer | Both   | 51 (33 to 74)    | 2.3 (1.5 to 3.3)   | 3.2 (-26.1 to 42.6)   | 768 (583 to 991)       | 34.7 (26.3 to 44.9)      | -14.2 (-35.7 to 11.5) |
|          |               | Male   | 49 (31 to 71)    | 5.1 (3.2 to 7.3)   | -0.4 (-29.3 to 38.1)  | 721 (545 to 934)       | 75.5 (57.2 to 97.6)      | -17.2 (-37.9 to 7.1)  |
|          |               | Female | 2 (2 to 4)       | 0.2 (0.1 to 0.3)   | -6.9 (-30.6 to 22.7)  | 48 (36 to 63)          | 3.7 (2.8 to 5)           | -20.1 (-41.5 to 6.1)  |
| eSwatini | TBL cancer    | Both   | 23 (12 to 37)    | 3.9 (2.1 to 6.1)   | -6.6 (-30.4 to 34.2)  | 2930 (1730 to 4280)    | 461.7 (277.8 to 660.5)   | -9.6 (-29.9 to 22.1)  |
|          |               | Male   | 17 (8 to 27)     | 6.8 (3.4 to 10.7)  | -7.1 (-31.2 to 37.6)  | 2160 (1230 to 3100)    | 812.7 (479.4 to 1142.9)  | -10.3 (-29.4 to 22.7) |
|          |               | Female | 7 (3 to 12)      | 2 (1 to 3.5)       | -0.6 (-34.9 to 60.8)  | 769 (441 to 1240)      | 214.9 (125.5 to 344)     | -3.4 (-33.8 to 44.6)  |
|          | Larynx cancer | Both   | 7 (4 to 10)      | 1.1 (0.7 to 1.6)   | -11.3 (-33.2 to 21.2) | 383 (275 to 534)       | 58.8 (42.8 to 81.4)      | -19.1 (-35.6 to 5.1)  |
|          |               | Male   | 6 (4 to 9)       | 2.3 (1.4 to 3.3)   | -7.8 (-32.6 to 28.8)  | 330 (239 to 462)       | 121.3 (90.3 to 164.3)    | -16.2 (-33 to 7.4)    |
|          |               | Female | 1 (1 to 2)       | 0.3 (0.2 to 0.5)   | -17.5 (-40.5 to 19.2) | 53 (30 to 84)          | 14.2 (8.4 to 22.3)       | -26 (-48.8 to 12.1)   |
| Ethiopia | TBL cancer    | Both   | 510 (298 to 762) | 1.3 (0.7 to 1.9)   | 4.4 (-17.9 to 34.9)   | 55000 (37900 to 74500) | 130.5 (89.9 to 177.3)    | 2.8 (-17 to 27.5)     |
|          |               | Male   | 390 (231 to 591) | 1.9 (1.1 to 2.9)   | 2.9 (-24.2 to 40.8)   | 42000 (28700 to 57500) | 197.5 (134.5 to 270.8)   | 1.2 (-23.2 to 33.6)   |
|          |               | Female | 120 (61 to 211)  | 0.6 (0.3 to 1)     | 23 (-0.1 to 55.6)     | 13000 (7930 to 21300)  | 59.1 (36.2 to 97.1)      | 21.9 (-0.8 to 53.8)   |
|          | Larynx cancer | Both   | 215 (143 to 306) | 0.5 (0.3 to 0.7)   | -7.7 (-23.5 to 12.6)  | 10700 (8420 to 14100)  | 23.1 (18.3 to 31)        | -13.3 (-30.1 to 7.3)  |
|          |               | Male   | 175 (114 to 261) | 0.8 (0.5 to 1.2)   | -5.8 (-25.1 to 18.9)  | 8950 (6730 to 12400)   | 38.3 (28.8 to 53.5)      | -11.3 (-31.3 to 13.6) |
|          |               | Female | 40 (27 to 56)    | 0.2 (0.1 to 0.2)   | -6.2 (-22.2 to 12.9)  | 1710 (1330 to 2090)    | 7.2 (5.7 to 8.7)         | -13.7 (-31.2 to 6.3)  |
| Fiji     | TBL cancer    | Both   | 17 (11 to 24)    | 2.3 (1.5 to 3.2)   | 6.2 (-22.2 to 44.8)   | 1930 (1500 to 2460)    | 243.7 (190.8 to 305.2)   | 6.2 (-16.5 to 33.4)   |
|          |               | Male   | 11 (7 to 16)     | 3.2 (2 to 4.5)     | 4.7 (-26.6 to 48.9)   | 1250 (956 to 1600)     | 336.2 (262.8 to 425.7)   | 5.1 (-17.5 to 33.5)   |
|          |               | Female | 6 (4 to 9)       | 1.6 (1 to 2.3)     | 10 (-26 to 55.4)      | 687 (525 to 894)       | 166 (127 to 213.8)       | 9.4 (-18.7 to 42.2)   |
|          |               | Both   | 3 (2 to 5)       | 0.5 (0.3 to 0.6)   | 2.8 (-19.3 to 29.4)   | 133 (100 to 171)       | 17.2 (13.3 to 21.9)      | -1.8 (-23.4 to 25.7)  |

|            |               |        |                       |                    |                       |                           |                           |                        |
|------------|---------------|--------|-----------------------|--------------------|-----------------------|---------------------------|---------------------------|------------------------|
|            | Larynx cancer | Male   | 3 (2 to 4)            | 0.9 (0.6 to 1.2)   | 7.9 (-16.9 to 37.5)   | 110 (81 to 143)           | 32 (24.3 to 40.8)         | 3.8 (-19.1 to 34.4)    |
|            |               | Female | 1 (0 to 1)            | 0.1 (0.1 to 0.2)   | -14 (-33.4 to 12.8)   | 23 (17 to 31)             | 5.2 (3.9 to 7)            | -19.7 (-40.6 to 9)     |
| Finland    | TBL cancer    | Both   | 771 (513 to 1090)     | 6.4 (4.2 to 9)     | -6.7 (-29.7 to 23.1)  | 48700 (44900 to 52000)    | 423.6 (391.7 to 452.7)    | -10.9 (-16.9 to -4.6)  |
|            |               | Male   | 492 (320 to 695)      | 8.9 (5.8 to 12.6)  | -13.5 (-36.5 to 18.2) | 32200 (29700 to 34600)    | 596.8 (551.9 to 643.4)    | -17.2 (-23.5 to -10.9) |
|            |               | Female | 279 (185 to 404)      | 4.3 (2.9 to 6.4)   | 2.9 (-26 to 39.3)     | 16500 (14800 to 18100)    | 275.6 (249.2 to 302.5)    | 0.1 (-8.9 to 10.1)     |
|            | Larynx cancer | Both   | 108 (71 to 156)       | 1 (0.7 to 1.5)     | -5.3 (-28.7 to 25.4)  | 930 (832 to 1040)         | 8.9 (8 to 10)             | -14.4 (-24.3 to -3.6)  |
|            |               | Male   | 89 (58 to 128)        | 1.8 (1.2 to 2.6)   | -7.7 (-32 to 23.1)    | 820 (723 to 922)          | 16.6 (14.6 to 18.6)       | -16.6 (-27 to -5.1)    |
|            |               | Female | 19 (13 to 28)         | 0.4 (0.2 to 0.5)   | -2.1 (-23.5 to 25.3)  | 109 (89 to 130)           | 2.1 (1.7 to 2.4)          | -8.8 (-21.1 to 6.5)    |
| France     | TBL cancer    | Both   | 11200 (7340 to 15700) | 9.4 (6.2 to 13.4)  | -7.5 (-30.9 to 20.8)  | 869000 (814000 to 921000) | 771.2 (722.8 to 818.4)    | -12 (-17.6 to -6.8)    |
|            |               | Male   | 7910 (5120 to 11400)  | 14.3 (9.3 to 20.5) | -12 (-35.2 to 17.5)   | 631000 (587000 to 674000) | 1180.9 (1098.1 to 1260.1) | -15.8 (-22.2 to -9.7)  |
|            |               | Female | 3260 (2130 to 4700)   | 5.2 (3.4 to 7.6)   | 3.2 (-26.3 to 43.4)   | 239000 (217000 to 261000) | 410.4 (374.4 to 447.7)    | -1.9 (-9.7 to 6.7)     |
|            | Larynx cancer | Both   | 3060 (1990 to 4480)   | 2.7 (1.8 to 4)     | -3.1 (-31.6 to 36.1)  | 41200 (37000 to 45500)    | 37.3 (33.5 to 41.3)       | -9.9 (-19.1 to 1.1)    |
|            |               | Male   | 2740 (1770 to 4050)   | 5.2 (3.3 to 7.6)   | -4.6 (-34.2 to 34.4)  | 36300 (32500 to 40600)    | 69.3 (61.8 to 77.8)       | -11.3 (-21.6 to 0.7)   |
|            |               | Female | 319 (196 to 474)      | 0.6 (0.4 to 0.9)   | 4.9 (-19.7 to 38.1)   | 4920 (3480 to 5750)       | 8.6 (6.1 to 10.1)         | -2 (-15.4 to 14.6)     |
| Gabon      | TBL cancer    | Both   | 46 (27 to 73)         | 4.3 (2.5 to 6.6)   | 0.8 (-22.2 to 32.4)   | 5480 (3590 to 7970)       | 481.4 (320.4 to 687.9)    | -1.7 (-20.7 to 23.2)   |
|            |               | Male   | 34 (19 to 55)         | 6.7 (3.9 to 10.6)  | -3.3 (-27 to 33.7)    | 4070 (2670 to 6040)       | 748.1 (506.3 to 1092.9)   | -5.2 (-22.8 to 19.5)   |
|            |               | Female | 13 (7 to 20)          | 2.3 (1.3 to 3.5)   | 9.6 (-25.9 to 59.9)   | 1400 (863 to 2080)        | 239.1 (149.7 to 347.5)    | 7.7 (-18.7 to 41.6)    |
|            | Larynx cancer | Both   | 10 (7 to 15)          | 0.9 (0.6 to 1.3)   | -2.6 (-23.4 to 24.5)  | 499 (360 to 673)          | 43.1 (31.6 to 58)         | -9.5 (-28.8 to 16.7)   |
|            |               | Male   | 9 (6 to 13)           | 1.7 (1.1 to 2.5)   | -2.4 (-23.8 to 26.7)  | 450 (320 to 616)          | 81.7 (59.3 to 110.9)      | -8.5 (-27.4 to 17.2)   |
|            |               | Female | 1 (1 to 2)            | 0.2 (0.1 to 0.3)   | -10.2 (-31.9 to 17.5) | 49 (33 to 70)             | 8.1 (5.6 to 11.5)         | -17.8 (-40.4 to 10.8)  |
| The Gambia | TBL cancer    | Both   | 16 (10 to 24)         | 1.7 (1.1 to 2.5)   | 9.1 (-20 to 45.6)     | 1770 (1330 to 2310)       | 180.3 (135.8 to 234.3)    | 8.9 (-12.8 to 34.7)    |
|            |               | Male   | 11 (7 to 16)          | 2.4 (1.5 to 3.5)   | 4 (-28.6 to 46.9)     | 1160 (871 to 1490)        | 244.8 (187.4 to 312.4)    | 3 (-19.4 to 28.8)      |
|            |               | Female | 6 (3 to 9)            | 1.1 (0.6 to 1.8)   | 22 (-15.2 to 69.2)    | 611 (379 to 862)          | 118.8 (73.6 to 169.2)     | 25.2 (-6.7 to 65.7)    |
|            | Larynx cancer | Both   | 3 (2 to 5)            | 0.3 (0.2 to 0.5)   | 6 (-17.5 to 33.3)     | 168 (128 to 217)          | 16.6 (12.7 to 20.8)       | 2.8 (-19.2 to 31.4)    |
|            |               | Male   | 3 (2 to 4)            | 0.6 (0.4 to 0.9)   | 6.2 (-17.4 to 36)     | 144 (109 to 186)          | 29.1 (22.3 to 36.7)       | 3.2 (-19.1 to 33.4)    |
|            |               | Female | 0 (0 to 1)            | 0.1 (0.1 to 0.1)   | 9.2 (-18 to 44.2)     | 25 (17 to 34)             | 4.5 (3.2 to 6.2)          | 6.3 (-22.2 to 42.7)    |
| Georgia    | TBL cancer    | Both   | 406 (276 to 552)      | 7.2 (4.8 to 9.8)   | 6 (-19 to 38.4)       | 45300 (37600 to 53700)    | 821.4 (679.1 to 973)      | 3.9 (-16 to 26.3)      |

|         |               |        |                        |                     |                       |                              |                           |                       |
|---------|---------------|--------|------------------------|---------------------|-----------------------|------------------------------|---------------------------|-----------------------|
|         |               | Male   | 343 (233 to 471)       | 14.1 (9.6 to 19.3)  | 6.4 (-20.9 to 40.2)   | 39000 (32300 to 46500)       | 1609.5 (1331.3 to 1909.8) | 4.3 (-15.9 to 27.8)   |
|         |               | Female | 63 (39 to 94)          | 1.9 (1.2 to 2.8)    | 2.5 (-30.9 to 46.3)   | 6320 (5210 to 7590)          | 205.3 (168.7 to 248.4)    | -0.6 (-20.3 to 23.1)  |
|         | Larynx cancer | Both   | 128 (87 to 177)        | 2.3 (1.6 to 3.2)    | 1.8 (-23.1 to 32.9)   | 5270 (4260 to 6450)          | 96.4 (78.4 to 118.5)      | -1.9 (-22.7 to 22.6)  |
|         |               | Male   | 119 (80 to 166)        | 4.9 (3.3 to 6.7)    | 3.2 (-23.5 to 36.9)   | 5010 (4030 to 6140)          | 207.3 (168 to 252.9)      | -0.9 (-22.2 to 24.7)  |
|         |               | Female | 9 (6 to 14)            | 0.3 (0.2 to 0.5)    | -17.5 (-31.7 to 0.9)  | 262 (205 to 427)             | 8.7 (6.8 to 13.9)         | -25.7 (-42.7 to -4.8) |
| Germany | TBL cancer    | Both   | 15700 (10500 to 22100) | 9.1 (6.1 to 12.9)   | -9.1 (-32.5 to 20.8)  | 1100000 (1040000 to 1160000) | 659.6 (624.2 to 695.3)    | -10.4 (-15.1 to -5.6) |
|         |               | Male   | 9920 (6540 to 14100)   | 12.1 (7.9 to 17.2)  | -15.5 (-38.6 to 13.2) | 716000 (671000 to 761000)    | 896.9 (841.1 to 952.9)    | -16 (-21.1 to -10.3)  |
|         |               | Female | 5750 (3730 to 8190)    | 6.5 (4.2 to 9.4)    | 0.9 (-26.2 to 37.3)   | 382000 (351000 to 412000)    | 449.4 (414.1 to 485)      | -0.7 (-8.6 to 7.2)    |
|         | Larynx cancer | Both   | 2210 (1430 to 3210)    | 1.4 (0.9 to 2)      | -6.2 (-28.2 to 21.6)  | 36000 (33000 to 39300)       | 22.4 (20.5 to 24.4)       | -14.8 (-22.2 to -5.6) |
|         |               | Male   | 1920 (1230 to 2780)    | 2.5 (1.6 to 3.6)    | -8 (-29.9 to 20.8)    | 31100 (28300 to 34200)       | 40.1 (36.5 to 44.1)       | -16.8 (-25.3 to -7)   |
|         |               | Female | 296 (183 to 437)       | 0.4 (0.2 to 0.6)    | -0.1 (-22.1 to 27.9)  | 4930 (3520 to 5610)          | 6 (4.3 to 6.9)            | -5.5 (-16.9 to 8.1)   |
| Ghana   | TBL cancer    | Both   | 327 (210 to 469)       | 2 (1.3 to 2.9)      | 6.5 (-18.2 to 41.8)   | 37600 (29800 to 47100)       | 213.6 (171.7 to 268.3)    | 6.1 (-12.7 to 30.9)   |
|         |               | Male   | 219 (135 to 324)       | 3.2 (2 to 4.6)      | 5.4 (-24.4 to 50.3)   | 25000 (19700 to 31600)       | 333 (266.7 to 415.7)      | 4.7 (-16.9 to 33.3)   |
|         |               | Female | 108 (68 to 158)        | 1.1 (0.7 to 1.7)    | 16.9 (-14.9 to 56)    | 12600 (9440 to 16200)        | 120.9 (92 to 156.9)       | 17.7 (-7.4 to 46.8)   |
|         | Larynx cancer | Both   | 129 (87 to 185)        | 0.8 (0.5 to 1.1)    | 1.6 (-20 to 29.8)     | 6300 (4770 to 8170)          | 36.4 (28.2 to 46.6)       | -3.4 (-22.6 to 22.4)  |
|         |               | Male   | 118 (78 to 170)        | 1.6 (1.1 to 2.3)    | 6.6 (-17.5 to 38.9)   | 5790 (4340 to 7550)          | 75.9 (58 to 97.5)         | 1.6 (-18.9 to 29.8)   |
|         |               | Female | 12 (8 to 17)           | 0.1 (0.1 to 0.2)    | -3.9 (-23.2 to 23.4)  | 513 (383 to 672)             | 5.3 (4 to 6.9)            | -10.1 (-29.4 to 17.5) |
| Greece  | TBL cancer    | Both   | 2170 (1420 to 3070)    | 10.2 (6.7 to 14.6)  | -3.3 (-28.6 to 25.4)  | 170000 (160000 to 179000)    | 846.7 (798 to 895.3)      | -4.6 (-10.1 to 1.5)   |
|         |               | Male   | 1680 (1100 to 2380)    | 16.9 (10.9 to 24.1) | -5.8 (-30.7 to 22.1)  | 134000 (126000 to 142000)    | 1410.8 (1326.4 to 1498.8) | -7 (-13.1 to -0.7)    |
|         |               | Female | 495 (312 to 706)       | 4.4 (2.8 to 6.4)    | 6.3 (-25.8 to 46.5)   | 36100 (32800 to 39200)       | 346.6 (316.6 to 374.9)    | 5.2 (-3.9 to 14.9)    |
|         | Larynx cancer | Both   | 526 (344 to 748)       | 2.6 (1.7 to 3.7)    | -9 (-32.3 to 22.6)    | 7770 (7130 to 8400)          | 38.4 (35.3 to 41.6)       | -9.5 (-17.3 to -1.7)  |
|         |               | Male   | 481 (311 to 690)       | 5 (3.2 to 7.2)      | -9.6 (-34 to 22.9)    | 7090 (6490 to 7710)          | 74.7 (68.2 to 81.2)       | -10 (-18.1 to -1.8)   |



|           |               |        |                  |                     |                       |                        |                           |                        |
|-----------|---------------|--------|------------------|---------------------|-----------------------|------------------------|---------------------------|------------------------|
|           |               | Female | 45 (31 to 65)    | 0.5 (0.3 to 0.7)    | -1.3 (-18.6 to 21.4)  | 677 (577 to 760)       | 6.2 (5.5 to 7)            | -2.1 (-12.3 to 9.3)    |
| Greenland | TBL cancer    | Both   | 12 (8 to 16)     | 17 (11.6 to 22.7)   | -12.8 (-27.8 to 4.3)  | 1290 (1040 to 1540)    | 1752 (1422.3 to 2080.2)   | -14.7 (-28.9 to 0)     |
|           |               | Male   | 7 (5 to 10)      | 19.4 (13.1 to 26.3) | -13.3 (-29.8 to 6.1)  | 798 (623 to 967)       | 1997.6 (1563 to 2393.8)   | -14.9 (-31.1 to 1.3)   |
|           |               | Female | 5 (3 to 6)       | 14.3 (9.5 to 19.4)  | -12.5 (-32.3 to 10.7) | 496 (398 to 607)       | 1470.7 (1195.8 to 1801.1) | -14.7 (-30 to 4.3)     |
|           | Larynx cancer | Both   | 1 (1 to 1)       | 1.2 (0.8 to 1.6)    | -6.6 (-26.7 to 17.8)  | 27 (21 to 33)          | 35.3 (27.3 to 43.4)       | -16.5 (-32.9 to 2)     |
|           |               | Male   | 1 (1 to 1)       | 2 (1.3 to 2.8)      | -6.2 (-26.9 to 20.2)  | 25 (19 to 31)          | 61.1 (47.3 to 75.8)       | -15.8 (-32.8 to 4.1)   |
|           |               | Female | 0 (0 to 0)       | 0.2 (0.1 to 0.3)    | -14.9 (-32.5 to 8.2)  | 2 (1 to 2)             | 5 (3.9 to 6.3)            | -24 (-41.5 to -3.5)    |
| Grenada   | TBL cancer    | Both   | 4 (3 to 5)       | 3.3 (2.3 to 4.4)    | -3.5 (-22.2 to 19.5)  | 394 (348 to 445)       | 335.6 (298 to 375.7)      | -4.2 (-16.1 to 8.4)    |
|           |               | Male   | 3 (2 to 4)       | 4.7 (3.2 to 6.4)    | -19 (-37.1 to 3.1)    | 273 (243 to 306)       | 475.7 (426 to 531.4)      | -17.5 (-27.8 to -6.4)  |
|           |               | Female | 1 (1 to 2)       | 2 (1.3 to 2.8)      | 6.8 (-25.2 to 51.8)   | 121 (105 to 141)       | 205.6 (177.6 to 237.9)    | 6 (-9.9 to 25.6)       |
|           | Larynx cancer | Both   | 1 (1 to 1)       | 0.8 (0.6 to 1.1)    | -15.6 (-29.7 to 2.2)  | 35 (30 to 40)          | 29.5 (25.7 to 33.7)       | -23.9 (-35.9 to -10.1) |
|           |               | Male   | 1 (1 to 1)       | 1.5 (1.1 to 2)      | -24.6 (-38.9 to -5.5) | 31 (27 to 36)          | 53.6 (46.5 to 61.6)       | -31.9 (-42.6 to -19.2) |
|           |               | Female | 0 (0 to 0)       | 0.2 (0.2 to 0.3)    | -13.7 (-28.2 to 5.7)  | 4 (3 to 5)             | 6.9 (5.7 to 8.4)          | -20.4 (-35.4 to 0)     |
| Guam      | TBL cancer    | Both   | 13 (9 to 19)     | 7 (4.8 to 9.7)      | 4.5 (-17.9 to 31.7)   | 1450 (1200 to 1730)    | 753.6 (625 to 895.6)      | 4.8 (-14.1 to 25.9)    |
|           |               | Male   | 9 (6 to 12)      | 9.7 (6.5 to 13.4)   | -0.4 (-24.1 to 28.8)  | 975 (807 to 1170)      | 1028.8 (853.6 to 1234.2)  | -0.3 (-18.6 to 21.2)   |
|           |               | Female | 4 (3 to 6)       | 4.6 (3.1 to 6.6)    | 14.1 (-20.1 to 56.5)  | 473 (381 to 586)       | 488.7 (393.6 to 604.7)    | 14.8 (-10.1 to 42.7)   |
|           | Larynx cancer | Both   | 1 (0 to 1)       | 0.3 (0.2 to 0.5)    | -26 (-40.8 to -3.7)   | 17 (13 to 21)          | 8.7 (7.1 to 11.2)         | -28.1 (-42.8 to -5.9)  |
|           |               | Male   | 0 (0 to 1)       | 0.5 (0.4 to 0.8)    | -30.4 (-45.3 to -7.5) | 13 (10 to 17)          | 14 (11.1 to 18.1)         | -33 (-48 to -6.7)      |
|           |               | Female | 0 (0 to 0)       | 0.1 (0.1 to 0.2)    | -5.9 (-25.9 to 19.8)  | 4 (3 to 5)             | 4 (3.1 to 5)              | -6.7 (-28.1 to 20.9)   |
| Guatemala | TBL cancer    | Both   | 202 (131 to 294) | 1.8 (1.2 to 2.6)    | -9.3 (-36 to 26.8)    | 21500 (16500 to 27200) | 182.9 (141.2 to 231.3)    | -10.3 (-33 to 18.1)    |
|           |               | Male   | 116 (74 to 175)  | 2.3 (1.5 to 3.4)    | -9.7 (-40 to 37.4)    | 12400 (9460 to 15700)  | 234.5 (179.2 to 298.5)    | -11.6 (-35.9 to 18.3)  |
|           |               | Female | 86 (53 to 125)   | 1.4 (0.8 to 2)      | -7.8 (-35.8 to 33.8)  | 9150 (7100 to 11600)   | 140.3 (108.7 to 177.2)    | -7.2 (-29.8 to 24.5)   |
|           | Larynx cancer | Both   | 61 (41 to 85)    | 0.5 (0.3 to 0.7)    | -12.1 (-30.4 to 11)   | 1920 (1500 to 2450)    | 16.5 (12.9 to 21)         | -18.1 (-39.1 to 8.9)   |
|           |               | Male   | 35 (23 to 49)    | 0.7 (0.4 to 1)      | -12.6 (-34.2 to 17.1) | 1360 (1050 to 1730)    | 26 (20.1 to 33.1)         | -17.3 (-39.5 to 10.5)  |
|           |               | Female | 26 (17 to 38)    | 0.3 (0.2 to 0.5)    | -8.3 (-23.9 to 11.2)  | 565 (434 to 749)       | 8.7 (6.7 to 11.5)         | -16.5 (-37.2 to 11.4)  |
| Guinea    | TBL cancer    | Both   | 129 (83 to 189)  | 2.3 (1.5 to 3.4)    | 2.5 (-25 to 38.4)     | 14800 (11100 to 19300) | 253.9 (191.6 to 328.3)    | 0.9 (-18.6 to 24.3)    |
|           |               | Male   | 100 (62 to 151)  | 3.6 (2.2 to 5.4)    | -1.2 (-31.4 to 40.3)  | 11600 (8680 to 15200)  | 395 (299.1 to 516.3)      | -2.7 (-22.4 to 22.1)   |
|           |               | Female | 28 (17 to 42)    | 1 (0.6 to 1.6)      | 11.2 (-22 to 58.5)    | 3180 (2210 to 4240)    | 109 (76.9 to 144.5)       | 11.6 (-10.5 to 40.5)   |

|               |               |        |                  |                  |                      |                        |                        |                       |
|---------------|---------------|--------|------------------|------------------|----------------------|------------------------|------------------------|-----------------------|
|               | Larynx cancer | Both   | 36 (22 to 53)    | 0.6 (0.4 to 0.9) | 1.7 (-19.9 to 31.3)  | 1860 (1330 to 2470)    | 32.5 (23.2 to 43.2)    | -1.5 (-22.2 to 24)    |
|               |               | Male   | 32 (19 to 47)    | 1.1 (0.7 to 1.7) | 0.3 (-22.6 to 31.5)  | 1660 (1150 to 2240)    | 57.1 (39.8 to 76.9)    | -2.5 (-23.9 to 24.3)  |
|               |               | Female | 4 (3 to 6)       | 0.1 (0.1 to 0.2) | -1.6 (-22.8 to 23.7) | 201 (142 to 270)       | 6.9 (4.9 to 9.1)       | -4.2 (-25.7 to 21.3)  |
| Guinea-Bissau | TBL cancer    | Both   | 21 (12 to 35)    | 2.9 (1.7 to 4.7) | -1.8 (-26.4 to 32.8) | 2530 (1630 to 3700)    | 322.4 (206.6 to 467.8) | -2.2 (-19.3 to 21.1)  |
|               |               | Male   | 16 (8 to 27)     | 4.8 (2.5 to 8.3) | -5.1 (-31.1 to 35.8) | 1850 (1100 to 2910)    | 529 (317.5 to 815.5)   | -5.4 (-21.3 to 17.6)  |
|               |               | Female | 6 (4 to 9)       | 1.4 (0.9 to 2.1) | 8.6 (-23.6 to 49)    | 680 (487 to 909)       | 151.3 (110.3 to 203.8) | 8.9 (-13.7 to 37.7)   |
|               | Larynx cancer | Both   | 7 (4 to 10)      | 0.9 (0.5 to 1.2) | -5.3 (-26.7 to 22.4) | 365 (253 to 479)       | 45.8 (31.9 to 59.2)    | -8.9 (-27.8 to 15.5)  |
|               |               | Male   | 6 (4 to 9)       | 1.7 (1.1 to 2.5) | -5 (-26.9 to 24.9)   | 328 (218 to 435)       | 90.1 (61.7 to 116.9)   | -8.3 (-27.3 to 17.5)  |
|               |               | Female | 1 (0 to 1)       | 0.2 (0.1 to 0.3) | -7.1 (-27.5 to 19.6) | 37 (27 to 49)          | 8.3 (6 to 10.9)        | -11.5 (-31.9 to 16.3) |
| Guyana        | TBL cancer    | Both   | 13 (8 to 19)     | 2 (1.2 to 2.9)   | 4.5 (-23.8 to 40)    | 1490 (1140 to 1910)    | 219.5 (169.7 to 279.1) | 4 (-21.2 to 35)       |
|               |               | Male   | 8 (5 to 12)      | 2.7 (1.6 to 4)   | 1.2 (-31.3 to 46.6)  | 930 (699 to 1210)      | 290.8 (221 to 373.1)   | 0.6 (-25.3 to 34.8)   |
|               |               | Female | 5 (3 to 7)       | 1.4 (0.9 to 2.1) | 12.3 (-23 to 62.4)   | 562 (427 to 721)       | 156.7 (120.5 to 199.9) | 11.6 (-15.7 to 46.7)  |
|               | Larynx cancer | Both   | 5 (3 to 7)       | 0.7 (0.4 to 1)   | 1.4 (-25.2 to 34.4)  | 218 (162 to 287)       | 31.4 (23.5 to 40.9)    | -3.4 (-29.1 to 30)    |
|               |               | Male   | 4 (3 to 6)       | 1.3 (0.8 to 1.8) | 2.5 (-25.8 to 38.5)  | 197 (145 to 260)       | 59.3 (44.2 to 77.8)    | -2.3 (-28.8 to 32.6)  |
|               |               | Female | 1 (0 to 1)       | 0.2 (0.1 to 0.2) | 2.4 (-21 to 33.6)    | 22 (16 to 29)          | 6.1 (4.6 to 8.1)       | -2.5 (-28.9 to 32.6)  |
| Haiti         | TBL cancer    | Both   | 183 (101 to 315) | 2.6 (1.4 to 4.4) | 0.7 (-23.4 to 31.5)  | 21400 (13100 to 34500) | 281.8 (174.3 to 457.5) | -0.3 (-18.3 to 23.3)  |
|               |               | Male   | 127 (63 to 249)  | 3.8 (1.9 to 7.5) | 0.3 (-26.7 to 40.1)  | 14700 (8090 to 27100)  | 418.2 (236.6 to 771.2) | -0.7 (-20.3 to 26)    |
|               |               | Female | 56 (32 to 88)    | 1.5 (0.8 to 2.3) | 4.4 (-26.8 to 44.9)  | 6640 (4320 to 9640)    | 160.2 (103.1 to 228.7) | 3.3 (-18.7 to 32.4)   |
|               | Larynx cancer | Both   | 80 (44 to 121)   | 1.1 (0.6 to 1.7) | 2.7 (-21.9 to 34.5)  | 4450 (2610 to 6500)    | 58.8 (34.8 to 85.2)    | -1.5 (-21.3 to 24.5)  |
|               |               | Male   | 68 (36 to 103)   | 2 (1 to 3)       | 5.5 (-22.9 to 44.5)  | 3860 (2210 to 5640)    | 108.9 (63.4 to 157.5)  | 1.4 (-21.2 to 32.3)   |
|               |               | Female | 12 (7 to 19)     | 0.3 (0.2 to 0.5) | -4.2 (-24.8 to 22)   | 589 (366 to 872)       | 14.2 (9 to 20.9)       | -9.5 (-29.7 to 17.1)  |
| Honduras      | TBL cancer    | Both   | 313 (178 to 492) | 5.1 (2.9 to 8)   | 14.1 (-12.5 to 50.4) | 34600 (22600 to 49900) | 548.1 (359 to 784.6)   | 11.9 (-11.1 to 42.2)  |
|               |               | Male   | 127 (65 to 203)  | 4.5 (2.3 to 7.1) | 13 (-23.2 to 62.5)   | 14000 (8790 to 19700)  | 475.7 (294.9 to 672.1) | 10.8 (-16.4 to 50.3)  |
|               |               | Female | 186 (96 to 312)  | 5.8 (3 to 9.5)   | 13.9 (-20.3 to 60.7) | 20600 (12400 to 30700) | 612.5 (366.8 to 907)   | 11.9 (-15.1 to 48.6)  |
|               | Larynx cancer | Both   | 47 (32 to 67)    | 0.7 (0.5 to 1)   | 12.5 (-8.2 to 41.6)  | 1810 (1370 to 2310)    | 29.2 (22.4 to 36.6)    | 6.7 (-14.8 to 36.5)   |
|               |               | Male   | 30 (19 to 43)    | 1 (0.7 to 1.5)   | 19.4 (-10.8 to 66.9) | 1300 (957 to 1650)     | 44.3 (32.8 to 55.7)    | 12.2 (-16.2 to 52.4)  |

|           |               |        |                        |                     |                       |                              |                           |                       |
|-----------|---------------|--------|------------------------|---------------------|-----------------------|------------------------------|---------------------------|-----------------------|
|           |               | Female | 17 (11 to 25)          | 0.5 (0.3 to 0.7)    | 4.2 (-16.5 to 29.5)   | 518 (380 to 702)             | 15.7 (11.6 to 20.8)       | -1.3 (-25 to 29.1)    |
| Hungary   | TBL cancer    | Both   | 2170 (1500 to 2960)    | 12.1 (8.2 to 16.6)  | -11.4 (-29.7 to 9.9)  | 210000 (172000 to 257000)    | 1208.9 (980 to 1477.7)    | -16.2 (-31.8 to 2.9)  |
|           |               | Male   | 1330 (899 to 1810)     | 17.1 (11.5 to 23.6) | -17.3 (-34.7 to 4.5)  | 131000 (106000 to 161000)    | 1699.7 (1376.4 to 2082.2) | -21.6 (-36.9 to -3.1) |
|           |               | Female | 840 (566 to 1180)      | 8.3 (5.6 to 11.8)   | -2.6 (-26.8 to 29.4)  | 79100 (64600 to 96800)       | 830.5 (672.7 to 1023.3)   | -7.5 (-25.5 to 14.8)  |
|           | Larynx cancer | Both   | 493 (329 to 700)       | 3 (2 to 4.2)        | -17.6 (-37.8 to 7.6)  | 12900 (10400 to 15900)       | 79.2 (63.4 to 98.2)       | -27.2 (-41.9 to -9)   |
|           |               | Male   | 414 (271 to 592)       | 5.6 (3.7 to 7.9)    | -20.3 (-41.4 to 7.1)  | 11200 (9010 to 13900)        | 151.5 (120 to 187.9)      | -29.2 (-44 to -10.8)  |
|           |               | Female | 79 (50 to 115)         | 0.9 (0.6 to 1.3)    | -8.8 (-31.6 to 21.4)  | 1610 (1150 to 2010)          | 18.4 (12.7 to 23.2)       | -19.8 (-38.9 to 0.5)  |
| Iceland   | TBL cancer    | Both   | 48 (33 to 65)          | 9.1 (6.2 to 12.1)   | -10.8 (-25.7 to 6.5)  | 3010 (2690 to 3330)          | 580 (521.1 to 643.7)      | -13.7 (-22.2 to -4.1) |
|           |               | Male   | 26 (18 to 36)          | 10 (6.8 to 13.5)    | -11.6 (-29 to 7.4)    | 1610 (1430 to 1780)          | 627.4 (560.9 to 693.4)    | -12.3 (-22.1 to -1.6) |
|           |               | Female | 22 (15 to 30)          | 8.2 (5.7 to 11.3)   | -10.9 (-28.5 to 11.2) | 1400 (1230 to 1570)          | 536.3 (478.5 to 601.2)    | -15.8 (-25.3 to -5.2) |
|           | Larynx cancer | Both   | 5 (3 to 7)             | 1 (0.7 to 1.4)      | -1 (-19.2 to 20.6)    | 55 (48 to 63)                | 11 (9.6 to 12.6)          | -5.8 (-18.8 to 9.4)   |
|           |               | Male   | 4 (3 to 6)             | 1.7 (1.1 to 2.3)    | -1.9 (-22 to 22.3)    | 46 (39 to 53)                | 18.3 (15.8 to 21.3)       | -6.7 (-20.4 to 10.1)  |
|           |               | Female | 1 (1 to 1)             | 0.3 (0.2 to 0.5)    | -0.8 (-18.7 to 20.3)  | 10 (8 to 12)                 | 3.9 (3.1 to 4.6)          | -5.3 (-20.7 to 14.6)  |
| India     | TBL cancer    | Both   | 20400 (14200 to 27500) | 1.8 (1.2 to 2.4)    | 10.4 (-9.3 to 30.7)   | 2250000 (1850000 to 2670000) | 188.4 (155 to 222.8)      | 8.8 (-10.7 to 28.6)   |
|           |               | Male   | 14100 (9440 to 19700)  | 2.5 (1.7 to 3.5)    | 3.5 (-19.4 to 29)     | 1570000 (1220000 to 1940000) | 268.8 (209.9 to 329.1)    | 1 (-21 to 25.9)       |
|           |               | Female | 6290 (4080 to 8930)    | 1.1 (0.7 to 1.5)    | 32.2 (2 to 66.8)      | 683000 (529000 to 866000)    | 111.9 (86.8 to 141.6)     | 34.5 (2.2 to 71.1)    |
|           | Larynx cancer | Both   | 17200 (12200 to 23100) | 1.4 (1 to 1.9)      | 1 (-15.5 to 21.1)     | 823000 (688000 to 990000)    | 67.1 (56.2 to 80.6)       | -7 (-23.6 to 12.6)    |
|           |               | Male   | 14200 (9850 to 19300)  | 2.4 (1.7 to 3.3)    | -0.3 (-19 to 22.7)    | 693000 (559000 to 851000)    | 114.9 (92.8 to 140.8)     | -8.1 (-27.2 to 14.3)  |
|           |               | Female | 3010 (2010 to 4230)    | 0.5 (0.3 to 0.7)    | 12.1 (-8 to 38.6)     | 130000 (102000 to 162000)    | 20.8 (16.4 to 26)         | 4.5 (-17.1 to 30.7)   |
| Indonesia | TBL cancer    | Both   | 10900 (6940 to 15200)  | 5 (3.2 to 7)        | 6.5 (-13.5 to 28.8)   | 1270000 (919000 to 1590000)  | 550.8 (399.7 to 679.2)    | 4.5 (-15.3 to 25.7)   |
|           |               | Male   | 7400 (4570 to 10900)   | 7.2 (4.6 to 10.4)   | 5 (-20.3 to 35.8)     | 865000 (625000 to 1160000)   | 788.8 (578.8 to 1038.6)   | 3.1 (-21.3 to 33.7)   |
|           |               | Female | 3520 (1690 to 5940)    | 3.1 (1.5 to 5.2)    | 9.7 (-16.7 to 41.6)   | 404000 (224000 to 619000)    | 336.1 (187.8 to 511)      | 7.4 (-17.3 to 38.8)   |

|         |               |        |                     |                   |                       |                           |                        |                        |
|---------|---------------|--------|---------------------|-------------------|-----------------------|---------------------------|------------------------|------------------------|
|         | Larynx cancer | Both   | 1440 (940 to 2140)  | 0.6 (0.4 to 1)    | 2.4 (-15.7 to 22.8)   | 54100 (41200 to 72500)    | 23.6 (18.2 to 31.6)    | -6.2 (-24.8 to 15.8)   |
|         |               | Male   | 1100 (673 to 1740)  | 1.1 (0.6 to 1.7)  | 4.9 (-17.6 to 32)     | 43900 (31500 to 63100)    | 40.1 (29.1 to 57.4)    | -4 (-25.7 to 24.3)     |
|         |               | Female | 340 (227 to 478)    | 0.3 (0.2 to 0.4)  | -4.8 (-20.4 to 14)    | 10200 (7870 to 12900)     | 8.6 (6.7 to 10.6)      | -14.4 (-34.1 to 10)    |
| Iran    | TBL cancer    | Both   | 2020 (1450 to 2620) | 2.8 (2 to 3.6)    | 14.5 (5.6 to 23.8)    | 217000 (202000 to 232000) | 284 (263.3 to 304.5)   | 12.1 (4.8 to 20.3)     |
|         |               | Male   | 1340 (957 to 1760)  | 3.7 (2.7 to 4.8)  | 8 (-2.2 to 19.2)      | 149000 (136000 to 163000) | 393.2 (360.8 to 430.7) | 7.4 (-0.8 to 17.1)     |
|         |               | Female | 679 (482 to 882)    | 1.9 (1.3 to 2.4)  | 32.6 (16.6 to 48.1)   | 68000 (61900 to 73300)    | 176.3 (159.6 to 190.5) | 26 (13.1 to 37.4)      |
|         | Larynx cancer | Both   | 1250 (892 to 1680)  | 1.7 (1.2 to 2.2)  | 17.3 (9.3 to 30.8)    | 35800 (32700 to 39800)    | 46.4 (42.8 to 51.6)    | -2.8 (-8.4 to 8.3)     |
|         |               | Male   | 940 (668 to 1260)   | 2.5 (1.8 to 3.3)  | 11.3 (2.3 to 25.5)    | 27900 (25000 to 31500)    | 72.6 (65.5 to 81.9)    | -7.5 (-13.8 to 4.3)    |
|         |               | Female | 314 (218 to 421)    | 0.8 (0.6 to 1.1)  | 43.5 (31.1 to 58.2)   | 7920 (7360 to 8610)       | 20.5 (19 to 22.3)      | 21.6 (13.7 to 33.1)    |
| Iraq    | TBL cancer    | Both   | 957 (630 to 1390)   | 4.2 (2.7 to 5.9)  | 20.1 (-8.9 to 57.1)   | 110000 (83400 to 139000)  | 447.4 (343.5 to 552.8) | 16.3 (-4.5 to 41.5)    |
|         |               | Male   | 681 (429 to 986)    | 6.2 (4 to 8.9)    | 15.6 (-14.4 to 57.4)  | 78800 (60000 to 99600)    | 669.4 (511.7 to 817.7) | 12.4 (-9.2 to 41.6)    |
|         |               | Female | 277 (172 to 413)    | 2.3 (1.4 to 3.4)  | 36.1 (-7.3 to 92.8)   | 31000 (23100 to 40600)    | 237.3 (179.2 to 305.5) | 30.8 (1.9 to 70.2)     |
|         | Larynx cancer | Both   | 398 (260 to 568)    | 1.6 (1.1 to 2.3)  | 8.4 (-16.2 to 40.3)   | 14400 (10700 to 18500)    | 56.8 (43 to 71.2)      | -7.7 (-26.1 to 14.3)   |
|         |               | Male   | 289 (184 to 418)    | 2.5 (1.6 to 3.5)  | 10.2 (-18.2 to 49.1)  | 10600 (7970 to 13500)     | 88.1 (67.1 to 109.8)   | -6 (-26.8 to 19)       |
|         |               | Female | 109 (71 to 163)     | 0.8 (0.5 to 1.2)  | 5.4 (-20.8 to 43.9)   | 3760 (2700 to 5100)       | 27 (19.8 to 35.7)      | -10.7 (-32.1 to 20.2)  |
| Ireland | TBL cancer    | Both   | 604 (403 to 849)    | 8.1 (5.4 to 11.4) | -6.3 (-29.4 to 21.3)  | 43000 (39800 to 46100)    | 585.5 (540.4 to 627.6) | -13.5 (-19.8 to -7.2)  |
|         |               | Male   | 327 (212 to 464)    | 9.2 (6 to 13.1)   | -13.9 (-37.3 to 15.7) | 24000 (21800 to 25900)    | 677.1 (615.4 to 732.4) | -19.9 (-27.1 to -12.9) |
|         |               | Female | 277 (181 to 389)    | 7.2 (4.6 to 10.1) | 3 (-23.5 to 41.6)     | 19000 (17000 to 21200)    | 502.9 (450.4 to 562)   | -4.8 (-13.4 to 4.9)    |
|         | Larynx cancer | Both   | 113 (76 to 161)     | 1.6 (1.1 to 2.3)  | -7.9 (-31.2 to 22.7)  | 1340 (1190 to 1500)       | 18.7 (16.7 to 21)      | -20.4 (-29 to -11.3)   |
|         |               | Male   | 98 (64 to 142)      | 2.8 (1.9 to 4.1)  | -8.6 (-33.1 to 24.9)  | 1140 (1000 to 1290)       | 32.9 (28.7 to 37.1)    | -21 (-30.6 to -10.7)   |
|         |               | Female | 16 (10 to 23)       | 0.4 (0.3 to 0.7)  | -5.8 (-26.7 to 19.5)  | 199 (166 to 243)          | 5.4 (4.6 to 6.6)       | -17.8 (-30.5 to -2.9)  |
| Israel  | TBL cancer    | Both   | 634 (414 to 902)    | 5.6 (3.7 to 8)    | -5.1 (-29.5 to 23.8)  | 52000 (48600 to 55300)    | 472.5 (442.2 to 501)   | -9.9 (-15.5 to -4.2)   |

|         |               |        |                        |                    |                       |                              |                        |                        |
|---------|---------------|--------|------------------------|--------------------|-----------------------|------------------------------|------------------------|------------------------|
|         |               | Male   | 417 (267 to 601)       | 8 (5.1 to 11.5)    | -8.2 (-33.6 to 23.1)  | 35400 (33000 to 37900)       | 686.5 (639.6 to 735.1) | -12.4 (-18 to -5.8)    |
|         |               | Female | 217 (142 to 310)       | 3.5 (2.3 to 5.1)   | -0.6 (-29.9 to 35.9)  | 16700 (15000 to 18100)       | 281.8 (255.6 to 306.3) | -6.2 (-14.2 to 2.4)    |
|         | Larynx cancer | Both   | 125 (81 to 179)        | 1.1 (0.7 to 1.6)   | -5.5 (-29 to 22.6)    | 1950 (1750 to 2150)          | 17.8 (15.9 to 19.6)    | -14.8 (-23.8 to -5.3)  |
|         |               | Male   | 110 (71 to 158)        | 2.1 (1.4 to 3.1)   | -8 (-32 to 21.3)      | 1700 (1510 to 1900)          | 33.1 (29.3 to 37)      | -17.5 (-27.4 to -7.4)  |
|         |               | Female | 15 (10 to 22)          | 0.3 (0.2 to 0.4)   | 5.9 (-15.9 to 32.1)   | 251 (215 to 296)             | 4.3 (3.7 to 5)         | -0.7 (-13 to 14.6)     |
| Italy   | TBL cancer    | Both   | 10100 (7040 to 13500)  | 7.6 (5.2 to 10.2)  | -10.6 (-27.1 to 7.6)  | 689000 (646000 to 718000)    | 544.4 (516.5 to 565.5) | -12.8 (-15.3 to -10.5) |
|         |               | Male   | 6880 (4660 to 9760)    | 11.2 (7.6 to 15.9) | -16.7 (-36.3 to 7.9)  | 493000 (465000 to 517000)    | 830.9 (788 to 869)     | -18.1 (-20.8 to -15.5) |
|         |               | Female | 3190 (2150 to 4420)    | 4.6 (3 to 6.4)     | 1.1 (-21.7 to 31.5)   | 196000 (180000 to 207000)    | 300.4 (282 to 315.1)   | -0.9 (-4.3 to 3.1)     |
|         | Larynx cancer | Both   | 2510 (1670 to 3460)    | 2.1 (1.4 to 2.9)   | -10.8 (-28.3 to 11.4) | 33200 (31200 to 35100)       | 27 (25.5 to 28.4)      | -16.9 (-20.5 to -12.6) |
|         |               | Male   | 2150 (1410 to 2990)    | 3.8 (2.5 to 5.3)   | -12.9 (-32.7 to 10.5) | 30000 (28200 to 31800)       | 52 (49.2 to 55)        | -18.7 (-22.4 to -14.3) |
|         |               | Female | 360 (234 to 515)       | 0.6 (0.4 to 0.8)   | -4 (-22 to 18.4)      | 3260 (2830 to 3720)          | 5.1 (4.5 to 5.7)       | -11.2 (-17.2 to -2.5)  |
| Jamaica | TBL cancer    | Both   | 132 (85 to 191)        | 4.5 (2.9 to 6.5)   | -4.4 (-32 to 28.8)    | 13800 (10700 to 17400)       | 467.4 (361.3 to 586.8) | -2.8 (-24.7 to 23.7)   |
|         |               | Male   | 103 (65 to 148)        | 7.1 (4.5 to 10.2)  | -8.3 (-36.1 to 26.7)  | 10800 (8300 to 13700)        | 743.5 (570.6 to 939.2) | -6.7 (-27.9 to 19.2)   |
|         |               | Female | 30 (18 to 45)          | 1.9 (1.2 to 2.9)   | 10.7 (-26.7 to 62.9)  | 3040 (2300 to 3940)          | 199.9 (151 to 260.1)   | 13 (-15.7 to 49.2)     |
|         | Larynx cancer | Both   | 25 (16 to 36)          | 0.8 (0.5 to 1.2)   | -6.9 (-33.2 to 24.7)  | 888 (678 to 1150)            | 30.1 (23 to 39)        | -6.9 (-29.4 to 21.2)   |
|         |               | Male   | 23 (14 to 34)          | 1.6 (1 to 2.3)     | -8.5 (-34.9 to 23.7)  | 826 (629 to 1080)            | 57.4 (43.5 to 74.6)    | -8.4 (-31 to 20)       |
|         |               | Female | 2 (1 to 3)             | 0.1 (0.1 to 0.2)   | 12.1 (-10.4 to 41.5)  | 62 (48 to 83)                | 4.1 (3.1 to 5.4)       | 14.4 (-12.5 to 49.4)   |
| Japan   | TBL cancer    | Both   | 32100 (22500 to 42600) | 8.9 (6.3 to 11.8)  | -11 (-24.1 to 4.3)    | 1320000 (1180000 to 1390000) | 399.1 (370.5 to 417.5) | -14.3 (-17.1 to -11.9) |
|         |               | Male   | 22700 (15700 to 30700) | 14.1 (9.8 to 19)   | -14.8 (-30.6 to 4.7)  | 943000 (871000 to 993000)    | 624.5 (583.7 to 653.7) | -18.1 (-21.4 to -15.4) |
|         |               | Female | 9400 (6340 to 13100)   | 4.7 (3.2 to 6.5)   | -4.1 (-21.3 to 16)    | 372000 (307000 to 409000)    | 205.9 (183.2 to 221.5) | -6.9 (-10.7 to -3)     |
|         | Larynx cancer | Both   | 3080 (2100 to 4230)    | 1 (0.7 to 1.4)     | -10.9 (-24.7 to 5.9)  | 19400 (17700 to 20700)       | 6.2 (5.8 to 6.6)       | -17 (-20.3 to -12.2)   |
|         |               | Male   | 2670 (1800 to 3700)    | 1.8 (1.3 to 2.6)   | -13.2 (-29.1 to 5.9)  | 17200 (15800 to 18200)       | 11.7 (10.9 to 12.3)    | -19.1 (-22.8 to -14.1) |
|         |               | Female | 410 (275 to 611)       | 0.3 (0.2 to 0.4)   | -4.5 (-18.9 to 12.9)  | 2280 (1930 to 2620)          | 1.5 (1.4 to 1.7)       | -12.1 (-16.2 to -4.9)  |

|            |               |        |                   |                  |                       |                         |                          |                        |
|------------|---------------|--------|-------------------|------------------|-----------------------|-------------------------|--------------------------|------------------------|
| Jordan     | TBL cancer    | Both   | 216 (142 to 306)  | 3.3 (2.2 to 4.6) | -3.7 (-28.7 to 28.7)  | 24000 (19600 to 29100)  | 334.8 (274 to 405.7)     | -6.2 (-24.8 to 14.3)   |
|            |               | Male   | 163 (102 to 235)  | 4.7 (2.9 to 6.8) | -8.5 (-37.6 to 27.6)  | 18500 (14200 to 23500)  | 493.1 (382.4 to 622.3)   | -10.6 (-31.9 to 14.2)  |
|            |               | Female | 54 (35 to 78)     | 1.7 (1.1 to 2.5) | 12.4 (-18.6 to 58.6)  | 5530 (4310 to 7060)     | 160.2 (126.9 to 203.8)   | 8 (-15.4 to 36.7)      |
|            | Larynx cancer | Both   | 45 (30 to 66)     | 0.6 (0.4 to 0.9) | -7.8 (-28.6 to 18.6)  | 1190 (908 to 1560)      | 16.4 (12.6 to 21.6)      | -21.8 (-41.1 to 1.6)   |
|            |               | Male   | 39 (25 to 57)     | 1 (0.7 to 1.6)   | -10.9 (-33.1 to 18)   | 1040 (763 to 1400)      | 27.4 (20.4 to 37)        | -24.5 (-44.7 to 0.7)   |
|            |               | Female | 7 (4 to 10)       | 0.2 (0.1 to 0.3) | 8.1 (-12.9 to 32.3)   | 145 (111 to 190)        | 4.2 (3.2 to 5.4)         | -7.5 (-28.7 to 18.1)   |
| Kazakhstan | TBL cancer    | Both   | 887 (608 to 1200) | 4.9 (3.3 to 6.6) | -16.6 (-33.4 to 4.1)  | 98200 (83200 to 113000) | 525.1 (448.1 to 603.6)   | -20.6 (-32.7 to -7.5)  |
|            |               | Male   | 702 (475 to 986)  | 9.4 (6.4 to 13)  | -20.1 (-38.2 to 1.1)  | 78800 (66000 to 92400)  | 1001.8 (849.9 to 1168.3) | -24.1 (-36.5 to -11.1) |
|            |               | Female | 184 (120 to 258)  | 1.8 (1.2 to 2.5) | -3.7 (-34.9 to 40.8)  | 19400 (16100 to 22900)  | 185.9 (155 to 218.7)     | -7.3 (-24.1 to 10.3)   |
|            | Larynx cancer | Both   | 206 (140 to 284)  | 1.1 (0.7 to 1.5) | -10.4 (-30.5 to 13.6) | 7400 (6240 to 8660)     | 38.8 (32.8 to 45.4)      | -25.4 (-37.7 to -12.6) |
|            |               | Male   | 179 (120 to 248)  | 2.3 (1.5 to 3.1) | -12.7 (-34.6 to 14.3) | 6650 (5580 to 7800)     | 82.4 (69.5 to 96.7)      | -26.7 (-39.1 to -13.7) |
|            |               | Female | 27 (19 to 40)     | 0.3 (0.2 to 0.4) | -3.3 (-17.2 to 16.4)  | 748 (613 to 992)        | 7.1 (5.8 to 9.5)         | -22 (-35.8 to -2.2)    |
| Kenya      | TBL cancer    | Both   | 281 (190 to 392)  | 1.3 (0.9 to 1.8) | 0.9 (-17 to 18.4)     | 33400 (27400 to 41100)  | 142.2 (117.7 to 172.6)   | -1.3 (-16.1 to 15.3)   |
|            |               | Male   | 209 (140 to 290)  | 2.1 (1.4 to 2.9) | -5 (-24.9 to 16.8)    | 24500 (19500 to 30100)  | 226.3 (182.3 to 273.6)   | -6.4 (-24.2 to 15.7)   |
|            |               | Female | 72 (42 to 118)    | 0.6 (0.4 to 1)   | 17.6 (-8.4 to 58.3)   | 8860 (5950 to 13400)    | 68.9 (46.7 to 103.7)     | 13.2 (-11.7 to 48.3)   |
|            | Larynx cancer | Both   | 181 (124 to 259)  | 0.7 (0.5 to 1)   | -6.7 (-23.8 to 11.5)  | 9770 (7510 to 13200)    | 37.3 (28.8 to 51.1)      | -12.6 (-28.2 to 4.4)   |
|            |               | Male   | 154 (103 to 226)  | 1.3 (0.9 to 1.9) | -8.5 (-27 to 11.8)    | 8370 (6210 to 11800)    | 66.5 (49.7 to 94)        | -13.9 (-31.1 to 6.4)   |
|            |               | Female | 28 (18 to 39)     | 0.2 (0.1 to 0.3) | 1.1 (-18.5 to 28.6)   | 1400 (1040 to 1840)     | 10.1 (7.6 to 13.2)       | -6.9 (-27.1 to 17.2)   |
| Kiribati   | TBL cancer    | Both   | 3 (2 to 5)        | 4.3 (2.8 to 6.3) | 0.6 (-20 to 28.3)     | 410 (298 to 547)        | 509.7 (378.6 to 665.9)   | 0.1 (-16.6 to 18.6)    |
|            |               | Male   | 3 (2 to 4)        | 8 (5 to 12)      | 0.1 (-23 to 35.2)     | 339 (241 to 457)        | 954 (690.5 to 1254.5)    | 0.1 (-18.1 to 21.8)    |
|            |               | Female | 1 (0 to 1)        | 1.5 (0.9 to 2.4) | 6.1 (-23.6 to 46.8)   | 71 (50 to 95)           | 169.6 (122.9 to 225)     | 4 (-15.8 to 28.2)      |
|            | Larynx cancer | Both   | 0 (0 to 0)        | 0.4 (0.3 to 0.5) | -1.9 (-16.4 to 15.6)  | 13 (10 to 17)           | 17.4 (13.6 to 22)        | -4.1 (-19.4 to 14)     |
|            |               | Male   | 0 (0 to 0)        | 0.6 (0.4 to 0.9) | 2 (-17.7 to 25.5)     | 9 (6 to 12)             | 29 (22.1 to 37.1)        | 0 (-18.6 to 21.7)      |
|            |               | Female | 0 (0 to 0)        | 0.2 (0.1 to 0.3) | -7.3 (-25.4 to 15.9)  | 4 (3 to 6)              | 9.5 (7.1 to 12.5)        | -9.8 (-29.3 to 16.5)   |
| Kuwait     | TBL cancer    | Both   | 54 (36 to 75)     | 2.3 (1.5 to 3.2) | -0.2 (-25.5 to 30.8)  | 5490 (4500 to 6620)     | 212.5 (173 to 258.2)     | -3 (-20.7 to 17.6)     |

|            |               |        |                  |                    |                       |                        |                          |                        |
|------------|---------------|--------|------------------|--------------------|-----------------------|------------------------|--------------------------|------------------------|
|            |               | Male   | 40 (26 to 58)    | 2.9 (1.9 to 4.3)   | 5 (-25.6 to 47.4)     | 4220 (3250 to 5290)    | 284.7 (220.3 to 354.9)   | 3.2 (-19.4 to 30.2)    |
|            |               | Female | 14 (9 to 20)     | 1.2 (0.8 to 1.9)   | -11.5 (-38.9 to 25.6) | 1270 (980 to 1600)     | 103 (81.2 to 128.8)      | -17.3 (-34 to 3)       |
|            | Larynx cancer | Both   | 19 (13 to 27)    | 0.7 (0.5 to 1)     | 5.1 (-17.6 to 31.5)   | 350 (274 to 431)       | 13.4 (10.6 to 16.5)      | -12 (-30.5 to 10.4)    |
|            |               | Male   | 16 (11 to 23)    | 1 (0.7 to 1.5)     | 12.4 (-14.8 to 43.5)  | 301 (230 to 382)       | 19.8 (15.3 to 24.9)      | -5.5 (-27.6 to 21.4)   |
|            |               | Female | 3 (2 to 5)       | 0.3 (0.2 to 0.4)   | -16.8 (-36.2 to 10.3) | 49 (36 to 71)          | 3.8 (2.8 to 5.5)         | -34.8 (-50.8 to -11.6) |
| Kyrgyzstan | TBL cancer    | Both   | 136 (92 to 187)  | 2.8 (1.9 to 3.9)   | -6.6 (-28.7 to 20.3)  | 15200 (13200 to 17400) | 305.3 (264.4 to 347.7)   | -9.8 (-22 to 2.9)      |
|            |               | Male   | 102 (67 to 144)  | 4.9 (3.2 to 6.9)   | -8.7 (-33.1 to 22.9)  | 11600 (9950 to 13300)  | 527.4 (455.8 to 603.6)   | -12.2 (-24.5 to 0.6)   |
|            |               | Female | 34 (22 to 47)    | 1.3 (0.8 to 1.8)   | 2.1 (-27.2 to 41.1)   | 3620 (2980 to 4290)    | 132.2 (109.5 to 156.4)   | 0.6 (-16.8 to 18.8)    |
|            | Larynx cancer | Both   | 29 (20 to 39)    | 0.6 (0.4 to 0.8)   | -10.1 (-25.4 to 10.3) | 1120 (940 to 1330)     | 21.6 (18.3 to 25.7)      | -19 (-32.6 to -2.8)    |
|            |               | Male   | 24 (17 to 33)    | 1.1 (0.8 to 1.5)   | -12.1 (-28.6 to 9.2)  | 971 (810 to 1170)      | 42.7 (35.8 to 51.2)      | -20.5 (-34.4 to -3.5)  |
|            |               | Female | 4 (3 to 6)       | 0.2 (0.1 to 0.2)   | 3.6 (-13.8 to 25.3)   | 144 (116 to 179)       | 5.1 (4.1 to 6.3)         | -6 (-25.7 to 17.5)     |
| Laos       | TBL cancer    | Both   | 220 (136 to 319) | 5 (3.1 to 7.2)     | 2.2 (-23.2 to 31.4)   | 26300 (19000 to 34800) | 561.5 (413.5 to 730.4)   | 1.2 (-18.4 to 24.3)    |
|            |               | Male   | 160 (96 to 237)  | 7.7 (4.7 to 11.2)  | -1.5 (-27.9 to 29.6)  | 19100 (13600 to 25100) | 853.6 (618.8 to 1102.9)  | -2.5 (-22.1 to 21.2)   |
|            |               | Female | 60 (36 to 95)    | 2.6 (1.6 to 4)     | 12 (-21.6 to 57.5)    | 7240 (5110 to 10400)   | 290.3 (206.9 to 412.9)   | 11.4 (-11.5 to 37.2)   |
|            | Larynx cancer | Both   | 30 (19 to 45)    | 0.7 (0.4 to 1)     | -0.1 (-19.5 to 23.1)  | 1340 (940 to 1830)     | 28.5 (20.2 to 38.9)      | -8.1 (-25 to 15.4)     |
|            |               | Male   | 23 (14 to 36)    | 1.1 (0.7 to 1.7)   | 1.3 (-20.3 to 29.8)   | 1070 (725 to 1530)     | 47.4 (33 to 67.1)        | -6.8 (-25.4 to 19.6)   |
|            |               | Female | 7 (4 to 9)       | 0.3 (0.2 to 0.4)   | -6.4 (-24 to 16.3)    | 271 (197 to 357)       | 10.9 (8 to 14.1)         | -14.4 (-32.9 to 11.7)  |
| Latvia     | TBL cancer    | Both   | 236 (162 to 332) | 6.4 (4.4 to 9)     | -12.2 (-32.4 to 13.6) | 21000 (17200 to 25700) | 595.6 (483.7 to 733.1)   | -16.7 (-32.9 to 3)     |
|            |               | Male   | 179 (119 to 257) | 12.4 (8.2 to 17.8) | -18.8 (-40.6 to 9)    | 16400 (12700 to 21000) | 1144.5 (890.1 to 1467.3) | -22.6 (-40.9 to -0.1)  |
|            |               | Female | 57 (33 to 86)    | 2.4 (1.4 to 3.7)   | 4.3 (-30.5 to 52.7)   | 4640 (3430 to 6190)    | 218.5 (158.8 to 294.2)   | -0.3 (-27.3 to 34.6)   |
|            | Larynx cancer | Both   | 56 (37 to 84)    | 1.7 (1.1 to 2.5)   | -10.7 (-34.6 to 21.3) | 1720 (1310 to 2210)    | 52.4 (39.8 to 67.8)      | -22.6 (-41.1 to 0.6)   |
|            |               | Male   | 53 (35 to 79)    | 3.8 (2.5 to 5.6)   | -13.8 (-37.5 to 19.6) | 1640 (1230 to 2120)    | 117.4 (88.7 to 152.9)    | -25.1 (-43.5 to -2.5)  |
|            |               | Female | 4 (2 to 5)       | 0.2 (0.1 to 0.3)   | -8.6 (-32.1 to 23)    | 84 (61 to 112)         | 4.2 (3 to 5.7)           | -21 (-42.4 to 7.8)     |
| Lebanon    | TBL cancer    | Both   | 320 (214 to 461) | 6.1 (4.1 to 8.9)   | -0.4 (-20.1 to 23.5)  | 32400 (26100 to 42200) | 623.4 (501.8 to 809.2)   | -3.7 (-18.7 to 13.1)   |
|            |               | Male   | 200 (132 to 296) | 8.5 (5.6 to 12.7)  | -4.8 (-25.2 to 23.4)  | 21600 (16900 to 28200) | 917.5 (717 to 1204.8)    | -6.1 (-20.8 to 11.2)   |

|           |               |        |                  |                    |                       |                        |                          |                      |
|-----------|---------------|--------|------------------|--------------------|-----------------------|------------------------|--------------------------|----------------------|
|           | Larynx cancer | Female | 120 (76 to 179)  | 4.2 (2.7 to 6.3)   | 16 (-20.7 to 58.8)    | 10800 (7940 to 14600)  | 380.8 (278.3 to 514.1)   | 9.6 (-16.5 to 34.4)  |
|           |               | Both   | 158 (109 to 223) | 3 (2.1 to 4.3)     | 9.4 (-14.5 to 39.5)   | 3530 (2850 to 4510)    | 67.9 (54.8 to 86.7)      | -8.5 (-25.3 to 12.8) |
|           |               | Male   | 131 (90 to 189)  | 5.6 (3.8 to 8)     | 13.7 (-14.1 to 49)    | 3020 (2420 to 3910)    | 128.6 (102.7 to 168.1)   | -4.7 (-23.6 to 18.6) |
|           |               | Female | 27 (17 to 40)    | 0.9 (0.6 to 1.4)   | 10.7 (-17.7 to 47)    | 503 (378 to 685)       | 17.7 (13.3 to 24.3)      | -8.2 (-30.1 to 20.1) |
| Lesotho   | TBL cancer    | Both   | 53 (30 to 81)    | 4 (2.3 to 6.1)     | 4.2 (-23.7 to 40.9)   | 6680 (4460 to 9510)    | 483.4 (324.2 to 680.9)   | 2.1 (-19.4 to 26.1)  |
|           |               | Male   | 39 (23 to 61)    | 7.2 (4.2 to 11.3)  | 1.6 (-25.3 to 41.4)   | 5160 (3440 to 7460)    | 880.4 (602.2 to 1262.5)  | -0.4 (-18.3 to 21)   |
|           |               | Female | 13 (7 to 23)     | 1.8 (0.9 to 3)     | 13.4 (-29.2 to 70.5)  | 1530 (874 to 2430)     | 197.6 (115.1 to 314.6)   | 12.5 (-23.3 to 54.7) |
|           | Larynx cancer | Both   | 18 (12 to 26)    | 1.3 (0.8 to 1.9)   | -0.7 (-26.9 to 32.6)  | 1080 (806 to 1440)     | 76.1 (57.2 to 100.5)     | -5.8 (-25.6 to 19.9) |
|           |               | Male   | 15 (9 to 22)     | 2.6 (1.6 to 3.8)   | 0.4 (-28.2 to 37.6)   | 919 (686 to 1210)      | 152 (115 to 198.3)       | -4.8 (-24 to 20.9)   |
|           |               | Female | 3 (2 to 5)       | 0.4 (0.2 to 0.6)   | -2.7 (-32 to 32.1)    | 163 (96 to 241)        | 20.5 (12.2 to 30)        | -7.4 (-37.6 to 29.1) |
| Liberia   | TBL cancer    | Both   | 41 (24 to 62)    | 2.1 (1.2 to 3.2)   | -0.3 (-25.9 to 32.5)  | 4650 (3110 to 6450)    | 216.7 (146.9 to 299.7)   | -0.4 (-21.2 to 25.1) |
|           |               | Male   | 29 (16 to 46)    | 2.9 (1.6 to 4.7)   | -4 (-30.9 to 33)      | 3280 (2090 to 4790)    | 305.5 (199.2 to 442)     | -4.4 (-24 to 20.6)   |
|           |               | Female | 12 (7 to 18)     | 1.2 (0.7 to 1.8)   | 10.7 (-20.7 to 53.2)  | 1370 (878 to 1830)     | 123.6 (80.3 to 163.4)    | 10.9 (-13.7 to 39.8) |
|           | Larynx cancer | Both   | 13 (8 to 18)     | 0.6 (0.4 to 0.9)   | -5.5 (-25.9 to 22.4)  | 623 (445 to 861)       | 28.7 (20.8 to 38.7)      | -7.3 (-27 to 20)     |
|           |               | Male   | 11 (7 to 16)     | 1.1 (0.7 to 1.5)   | -5.2 (-26.4 to 24.4)  | 554 (388 to 776)       | 49.7 (35.4 to 68)        | -7.1 (-27.8 to 21.5) |
|           |               | Female | 1 (1 to 2)       | 0.1 (0.1 to 0.2)   | -9.8 (-30 to 16.1)    | 69 (48 to 94)          | 6.1 (4.4 to 8.4)         | -12.1 (-32.9 to 16)  |
| Libya     | TBL cancer    | Both   | 212 (138 to 306) | 4.1 (2.7 to 5.9)   | -5.5 (-32.6 to 28.6)  | 24800 (18400 to 31700) | 453.7 (338.4 to 579)     | -5.3 (-28.1 to 20.6) |
|           |               | Male   | 181 (116 to 262) | 6.9 (4.4 to 10)    | -5 (-33.8 to 33.3)    | 21400 (15700 to 27500) | 771.9 (565 to 992.6)     | -4.9 (-28.1 to 23.2) |
|           |               | Female | 31 (18 to 48)    | 1.2 (0.7 to 1.9)   | -3 (-37.3 to 38.4)    | 3360 (2110 to 4670)    | 122.5 (77.9 to 168.2)    | -2 (-29.4 to 27.1)   |
|           | Larynx cancer | Both   | 107 (68 to 156)  | 1.9 (1.3 to 2.8)   | 3.1 (-23.8 to 38.2)   | 3940 (2940 to 5190)    | 68.3 (51.4 to 89.1)      | 4.9 (-20.7 to 37.3)  |
|           |               | Male   | 91 (58 to 135)   | 3.3 (2.1 to 4.8)   | 4.4 (-24.8 to 43.5)   | 3440 (2550 to 4610)    | 117.3 (87.2 to 155.8)    | 6.1 (-20.6 to 41.6)  |
|           |               | Female | 15 (10 to 22)    | 0.6 (0.3 to 0.8)   | -0.8 (-25.9 to 34.3)  | 502 (366 to 681)       | 17.1 (12.6 to 23)        | 0.2 (-24.1 to 31.6)  |
| Lithuania | TBL cancer    | Both   | 320 (219 to 443) | 5.9 (4 to 8.3)     | -13.9 (-34.6 to 11.2) | 29200 (23600 to 35600) | 569.8 (458.1 to 698.1)   | -17 (-33.3 to 2.1)   |
|           |               | Male   | 246 (166 to 347) | 11.6 (7.8 to 16.4) | -19.5 (-39.8 to 7)    | 23300 (18500 to 28700) | 1111.9 (883.8 to 1367.8) | -22 (-37.6 to -4.1)  |
|           |               | Female | 74 (47 to 108)   | 2.2 (1.4 to 3.2)   | 6.6 (-23.8 to 49.6)   | 5920 (4740 to 7290)    | 194.9 (154.4 to 240.9)   | 2.9 (-18.7 to 28.8)  |



|            |               |        |                    |                    |                       |                          |                        |                        |
|------------|---------------|--------|--------------------|--------------------|-----------------------|--------------------------|------------------------|------------------------|
|            | Larynx cancer | Both   | 85 (57 to 125)     | 1.7 (1.2 to 2.5)   | -16.9 (-38.8 to 11)   | 2950 (2350 to 3680)      | 61.6 (49 to 77.8)      | -24.8 (-41.2 to -5.3)  |
|            |               | Male   | 79 (52 to 115)     | 3.8 (2.5 to 5.6)   | -18.8 (-40.7 to 9.7)  | 2790 (2210 to 3510)      | 136.7 (107.7 to 172.2) | -26.3 (-42.3 to -7.3)  |
|            |               | Female | 6 (4 to 9)         | 0.2 (0.1 to 0.3)   | -1.8 (-23.6 to 25.4)  | 152 (116 to 192)         | 5.5 (4.2 to 7.1)       | -10.7 (-31.6 to 14.8)  |
| Luxembourg | TBL cancer    | Both   | 78 (52 to 107)     | 8.1 (5.4 to 11.1)  | -16.1 (-34.5 to 6.2)  | 6140 (5400 to 6960)      | 647.1 (569.2 to 733.3) | -17.3 (-27.3 to -5.7)  |
|            |               | Male   | 53 (35 to 73)      | 11.4 (7.6 to 15.8) | -20.9 (-39.6 to 2.7)  | 4200 (3660 to 4800)      | 910.9 (793 to 1040.7)  | -22.6 (-33.6 to -10.8) |
|            |               | Female | 25 (17 to 36)      | 5.1 (3.3 to 7.2)   | -10.6 (-35.6 to 20.8) | 1930 (1630 to 2290)      | 402.9 (338.6 to 475.8) | -8.9 (-22.7 to 7.7)    |
|            | Larynx cancer | Both   | 17 (12 to 24)      | 1.8 (1.2 to 2.6)   | -17.3 (-36.2 to 9)    | 219 (189 to 254)         | 23.4 (20.2 to 27.2)    | -22.2 (-32.9 to -9.2)  |
|            |               | Male   | 15 (10 to 21)      | 3.2 (2.1 to 4.6)   | -19.7 (-39.1 to 7.7)  | 187 (161 to 219)         | 40.4 (34.8 to 47.3)    | -24.8 (-35.7 to -11.4) |
|            |               | Female | 2 (1 to 3)         | 0.5 (0.3 to 0.7)   | -14.6 (-32.9 to 10.1) | 32 (27 to 40)            | 6.8 (5.6 to 8.4)       | -17.2 (-30.1 to 1.7)   |
| Madagascar | TBL cancer    | Both   | 165 (104 to 247)   | 1.5 (0.9 to 2.3)   | 0.4 (-25.1 to 34.9)   | 19400 (13900 to 25800)   | 159.6 (117.6 to 210.8) | 0.1 (-20.9 to 25.9)    |
|            |               | Male   | 109 (65 to 170)    | 2.1 (1.3 to 3.3)   | -5.2 (-35.2 to 36.6)  | 12900 (9060 to 17700)    | 226.1 (162.2 to 305.5) | -5.2 (-26.3 to 19.7)   |
|            |               | Female | 55 (34 to 83)      | 0.9 (0.6 to 1.4)   | 13.7 (-12.7 to 45.5)  | 6500 (4530 to 8900)      | 97.8 (68.4 to 132.8)   | 12.9 (-13.3 to 45.3)   |
|            | Larynx cancer | Both   | 64 (41 to 95)      | 0.5 (0.3 to 0.7)   | -5.7 (-25.6 to 20.3)  | 3570 (2560 to 4810)      | 26.4 (19.3 to 35.3)    | -8 (-29.2 to 18)       |
|            |               | Male   | 46 (29 to 70)      | 0.8 (0.5 to 1.1)   | -6.3 (-28.8 to 22.7)  | 2590 (1800 to 3600)      | 39.9 (28.3 to 54.9)    | -8.4 (-31.1 to 19.2)   |
|            |               | Female | 18 (11 to 27)      | 0.3 (0.2 to 0.4)   | -4.6 (-26.6 to 23.3)  | 978 (706 to 1360)        | 13.5 (9.9 to 18.5)     | -7.3 (-31.2 to 22.3)   |
| Malawi     | TBL cancer    | Both   | 99 (64 to 144)     | 1.4 (0.9 to 2)     | -2.3 (-25.5 to 25.7)  | 11000 (8450 to 14100)    | 143.9 (112.1 to 180.5) | -3.9 (-22.8 to 16.4)   |
|            |               | Male   | 69 (41 to 104)     | 2.2 (1.4 to 3.3)   | -7.7 (-34.8 to 29.3)  | 7760 (5750 to 10200)     | 231.1 (175.3 to 298)   | -8.9 (-28 to 13.7)     |
|            |               | Female | 31 (20 to 45)      | 0.8 (0.5 to 1.1)   | 12.6 (-13.1 to 41.4)  | 3270 (2360 to 4240)      | 75.9 (55.4 to 96.8)    | 11.9 (-15.1 to 42.3)   |
|            | Larynx cancer | Both   | 22 (15 to 31)      | 0.3 (0.2 to 0.4)   | -6.9 (-25.3 to 15.7)  | 1140 (865 to 1490)       | 13.8 (10.7 to 17.9)    | -10 (-29 to 13.3)      |
|            |               | Male   | 16 (11 to 24)      | 0.5 (0.3 to 0.7)   | -7.4 (-26.5 to 17.3)  | 862 (651 to 1160)        | 23.2 (18 to 30.5)      | -10.7 (-29.8 to 13.7)  |
|            |               | Female | 5 (4 to 8)         | 0.1 (0.1 to 0.2)   | -4.9 (-27.4 to 21.7)  | 277 (197 to 382)         | 6.1 (4.4 to 8.3)       | -7.7 (-31.1 to 22.5)   |
| Malaysia   | TBL cancer    | Both   | 1180 (742 to 1700) | 4.4 (2.8 to 6.3)   | -6.8 (-30.3 to 25.2)  | 124000 (94800 to 157000) | 448.5 (345.8 to 566.8) | -8 (-28.8 to 16.1)     |
|            |               | Male   | 822 (521 to 1200)  | 6.2 (4 to 9)       | -6.5 (-32.8 to 30.8)  | 87900 (66800 to 112000)  | 634.5 (485.3 to 808.2) | -7.8 (-29.1 to 17)     |
|            |               | Female | 355 (216 to 527)   | 2.7 (1.6 to 3.9)   | -7.9 (-36.5 to 26.7)  | 36400 (27800 to 46600)   | 263.8 (201.6 to 335.9) | -8.7 (-29.6 to 16.5)   |
|            | Larynx cancer | Both   | 296 (196 to 433)   | 1.1 (0.7 to 1.6)   | 26.8 (-5.5 to 67.9)   | 8030 (6090 to 10300)     | 28.8 (22 to 36.7)      | 15.5 (-11.2 to 47.3)   |

|                  |               |        |                  |                   |                      |                        |                         |                       |
|------------------|---------------|--------|------------------|-------------------|----------------------|------------------------|-------------------------|-----------------------|
|                  |               | Male   | 249 (160 to 371) | 1.8 (1.2 to 2.7)  | 28.1 (-7.1 to 73.7)  | 6840 (5110 to 8910)    | 49.1 (37 to 63.7)       | 16.3 (-11.9 to 50.4)  |
|                  |               | Female | 47 (32 to 67)    | 0.3 (0.2 to 0.5)  | 17.7 (-7.2 to 50.5)  | 1190 (890 to 1570)     | 8.5 (6.4 to 11.1)       | 8.9 (-17.6 to 43.8)   |
| Maldives         | TBL cancer    | Both   | 6 (4 to 9)       | 2.2 (1.5 to 3)    | -2 (-24.5 to 26.7)   | 614 (507 to 735)       | 197.2 (162.3 to 235.5)  | -4.6 (-21.7 to 14.9)  |
|                  |               | Male   | 5 (3 to 7)       | 3.1 (2.1 to 4.3)  | -3.2 (-30.7 to 30.9) | 474 (385 to 571)       | 280.4 (227.1 to 338)    | -6.4 (-25.1 to 14.6)  |
|                  |               | Female | 1 (1 to 2)       | 1.1 (0.7 to 1.6)  | 7.1 (-24.3 to 47.9)  | 140 (113 to 172)       | 100.2 (80.2 to 122.1)   | 3 (-17 to 27.5)       |
|                  | Larynx cancer | Both   | 2 (2 to 3)       | 0.8 (0.5 to 1.1)  | 9.6 (-14.8 to 39.9)  | 53 (43 to 66)          | 16.6 (13.4 to 20.6)     | -7.5 (-26.1 to 15.9)  |
|                  |               | Male   | 2 (2 to 3)       | 1.3 (0.9 to 1.9)  | 10.4 (-15.1 to 42.2) | 50 (40 to 62)          | 28.7 (22.9 to 35.7)     | -7.5 (-27.2 to 17.5)  |
|                  |               | Female | 0 (0 to 0)       | 0.1 (0.1 to 0.1)  | 1.3 (-18.9 to 26.5)  | 3 (3 to 4)             | 2.2 (1.7 to 2.7)        | -13.8 (-33.1 to 9.9)  |
| Mali             | TBL cancer    | Both   | 140 (89 to 205)  | 1.7 (1.1 to 2.4)  | 3.3 (-21.7 to 33.4)  | 15700 (11700 to 20800) | 174.2 (132.3 to 227.7)  | 4.3 (-13.5 to 25)     |
|                  |               | Male   | 98 (59 to 150)   | 2.2 (1.4 to 3.4)  | 0.7 (-29.2 to 42)    | 10900 (7380 to 14800)  | 237 (163.2 to 317.4)    | 1.6 (-17.8 to 24)     |
|                  |               | Female | 43 (27 to 62)    | 1 (0.7 to 1.5)    | 9.1 (-19.5 to 46.4)  | 4780 (3460 to 6280)    | 106.2 (77.8 to 137.7)   | 10.5 (-10.5 to 35.7)  |
|                  | Larynx cancer | Both   | 46 (30 to 67)    | 0.5 (0.3 to 0.7)  | 0.9 (-17.9 to 26.9)  | 2430 (1820 to 3270)    | 25.3 (19.2 to 33.9)     | -1.3 (-21.2 to 23)    |
|                  |               | Male   | 35 (22 to 52)    | 0.7 (0.5 to 1.1)  | 1.4 (-20.3 to 32.8)  | 1860 (1330 to 2570)    | 37.9 (27.7 to 51.8)     | -0.6 (-22.4 to 28.4)  |
|                  |               | Female | 11 (7 to 17)     | 0.2 (0.2 to 0.4)  | -1.8 (-22.5 to 23.9) | 575 (422 to 789)       | 11.8 (8.7 to 15.8)      | -4.5 (-25.9 to 22.1)  |
| Malta            | TBL cancer    | Both   | 49 (33 to 66)    | 5.5 (3.7 to 7.4)  | -8 (-27 to 16.1)     | 3930 (3490 to 4390)    | 458.9 (408 to 515.5)    | -9.5 (-19.8 to 1.4)   |
|                  |               | Male   | 38 (26 to 53)    | 9 (6.2 to 12.4)   | -15.3 (-34.2 to 7.5) | 3160 (2810 to 3530)    | 762.7 (679.2 to 848.9)  | -15 (-24.3 to -4.5)   |
|                  |               | Female | 10 (7 to 15)     | 2.3 (1.5 to 3.3)  | 11.6 (-21.1 to 50.8) | 767 (649 to 902)       | 182.6 (155.6 to 214.1)  | 4.4 (-11.4 to 21.2)   |
|                  | Larynx cancer | Both   | 14 (9 to 19)     | 1.7 (1.2 to 2.4)  | -0.3 (-21.8 to 25.6) | 193 (166 to 225)       | 24.5 (20.9 to 28.2)     | -11.8 (-24.1 to 2.7)  |
|                  |               | Male   | 12 (8 to 17)     | 3.1 (2.1 to 4.4)  | -2.8 (-25.1 to 24.3) | 171 (146 to 200)       | 44.6 (37.9 to 52.1)     | -13.9 (-26.7 to 0.9)  |
|                  |               | Female | 1 (1 to 2)       | 0.4 (0.2 to 0.5)  | -1.4 (-18.8 to 21)   | 22 (18 to 27)          | 5.5 (4.6 to 6.8)        | -12.3 (-27.9 to 4.6)  |
| Marshall Islands | TBL cancer    | Both   | 2 (1 to 4)       | 6.6 (3.6 to 10.5) | 0.5 (-22.5 to 30.1)  | 287 (171 to 434)       | 751.9 (463.1 to 1109.4) | 0.1 (-17.5 to 21.5)   |
|                  |               | Male   | 2 (1 to 3)       | 9.4 (4.6 to 16.3) | -1 (-25.5 to 32.6)   | 213 (115 to 347)       | 1086.2 (610.6 to 1750)  | -1.3 (-19.2 to 20.9)  |
|                  |               | Female | 1 (0 to 1)       | 3.5 (2 to 5.4)    | 6.2 (-23.6 to 44.9)  | 74 (49 to 107)         | 396.9 (265.7 to 566)    | 6.7 (-14.2 to 31)     |
|                  | Larynx cancer | Both   | 0 (0 to 0)       | 0.6 (0.4 to 0.9)  | -3 (-20.8 to 19.3)   | 10 (7 to 14)           | 27.2 (19.2 to 36.2)     | -7.2 (-23.6 to 14.5)  |
|                  |               | Male   | 0 (0 to 0)       | 0.9 (0.5 to 1.3)  | -2 (-22.4 to 25)     | 8 (5 to 10)            | 40.1 (26.8 to 54.5)     | -5.9 (-24 to 18.1)    |
|                  |               | Female | 0 (0 to 0)       | 0.3 (0.2 to 0.5)  | -7.2 (-27 to 15.1)   | 3 (2 to 4)             | 13.1 (9.3 to 17.9)      | -11.5 (-32.2 to 12.3) |
| Mauritania       | TBL cancer    | Both   | 49 (28 to 75)    | 2.4 (1.4 to 3.6)  | 3.4 (-24.5 to 34.5)  | 5290 (3510 to 7620)    | 247.5 (169.2 to 349.5)  | 1 (-23.1 to 25.2)     |
|                  |               | Male   | 32 (17 to 55)    | 3.2 (1.7 to 5.3)  | 0.9 (-29.8 to 35.3)  | 3420 (2100 to 5480)    | 322.2 (202.6 to 506)    | -1.8 (-27.1 to 22.6)  |

|                                 |               |        |                     |                     |                      |                           |                           |                       |
|---------------------------------|---------------|--------|---------------------|---------------------|----------------------|---------------------------|---------------------------|-----------------------|
|                                 | Larynx cancer | Female | 17 (10 to 26)       | 1.7 (1 to 2.5)      | 8.5 (-25.5 to 52.7)  | 1870 (1250 to 2590)       | 171.1 (118.1 to 235.8)    | 7.2 (-19.4 to 33.7)   |
|                                 |               | Both   | 10 (6 to 14)        | 0.5 (0.3 to 0.7)    | 0.5 (-22.6 to 25.5)  | 436 (297 to 604)          | 20.5 (14.2 to 27.8)       | -6.8 (-30.1 to 17.4)  |
|                                 |               | Male   | 9 (5 to 13)         | 0.8 (0.5 to 1.2)    | 1.7 (-23 to 30.6)    | 377 (251 to 539)          | 35.4 (24.2 to 49.8)       | -5.4 (-29.3 to 20.7)  |
|                                 |               | Female | 1 (1 to 2)          | 0.1 (0.1 to 0.2)    | -5.8 (-30.1 to 19.7) | 58 (41 to 80)             | 5.3 (3.8 to 7.2)          | -13.5 (-37.7 to 11.5) |
| Mauritius                       | TBL cancer    | Both   | 47 (31 to 67)       | 2.7 (1.8 to 3.8)    | -0.8 (-25.5 to 28.9) | 4900 (3950 to 5970)       | 275.2 (222.9 to 333.8)    | -3.1 (-22.7 to 19.4)  |
|                                 |               | Male   | 33 (21 to 47)       | 4.1 (2.7 to 5.8)    | -5.3 (-32 to 27.6)   | 3450 (2760 to 4240)       | 418.4 (337.7 to 510.9)    | -7 (-25.6 to 15.6)    |
|                                 |               | Female | 14 (9 to 21)        | 1.5 (1 to 2.2)      | 7.3 (-24 to 45.8)    | 1450 (1160 to 1780)       | 156.4 (124.8 to 191.7)    | 4.1 (-17.5 to 28.3)   |
|                                 | Larynx cancer | Both   | 18 (12 to 26)       | 1 (0.7 to 1.4)      | 1.3 (-19.5 to 26.8)  | 476 (373 to 593)          | 26.2 (20.5 to 32.7)       | -9.1 (-28 to 12.9)    |
|                                 |               | Male   | 16 (11 to 23)       | 1.9 (1.3 to 2.7)    | 3.5 (-19.1 to 32.4)  | 432 (337 to 541)          | 51 (40 to 63.4)           | -6.7 (-26.5 to 16.3)  |
|                                 |               | Female | 2 (1 to 3)          | 0.2 (0.1 to 0.4)    | -20.5 (-33.5 to 1.6) | 44 (33 to 86)             | 4.7 (3.6 to 9.3)          | -33.4 (-48.4 to -7.8) |
| Mexico                          | TBL cancer    | Both   | 2530 (1760 to 3330) | 2.2 (1.5 to 2.9)    | -1.9 (-15.6 to 13.6) | 244000 (208000 to 282000) | 206.2 (176.4 to 238.1)    | -3.3 (-16.9 to 12)    |
|                                 |               | Male   | 1570 (1080 to 2150) | 2.9 (2 to 4)        | -3.1 (-20.9 to 17.8) | 158000 (129000 to 192000) | 287.4 (235.7 to 350.4)    | -3.9 (-21.5 to 16.6)  |
|                                 |               | Female | 954 (640 to 1300)   | 1.5 (1 to 2.1)      | 1.5 (-16.9 to 23)    | 86500 (69800 to 106000)   | 135.9 (109.9 to 166.7)    | -0.8 (-19.3 to 22.2)  |
|                                 | Larynx cancer | Both   | 862 (603 to 1170)   | 0.7 (0.5 to 1)      | -2.6 (-15.7 to 12.1) | 24700 (20500 to 29700)    | 20.9 (17.3 to 25)         | -10 (-25.3 to 7.1)    |
|                                 |               | Male   | 639 (440 to 884)    | 1.2 (0.8 to 1.6)    | -1.7 (-19.5 to 18.6) | 21200 (17000 to 26100)    | 38.5 (31 to 47.3)         | -8.7 (-26.5 to 12.2)  |
|                                 |               | Female | 223 (150 to 324)    | 0.3 (0.2 to 0.5)    | -1.7 (-11.6 to 9.2)  | 3490 (2800 to 5120)       | 5.5 (4.4 to 8)            | -12.1 (-27.9 to 6.8)  |
| Federatead States of Micronesia | TBL cancer    | Both   | 5 (3 to 8)          | 6.9 (3.7 to 11.1)   | 5.3 (-18.2 to 34)    | 614 (352 to 941)          | 786.8 (465.9 to 1174.9)   | 4.7 (-18.1 to 27.5)   |
|                                 |               | Male   | 4 (2 to 7)          | 10.6 (5.4 to 18.5)  | 3.2 (-24.5 to 33.9)  | 449 (236 to 756)          | 1199.8 (678.2 to 1925.1)  | 2.3 (-21.7 to 24.7)   |
|                                 |               | Female | 1 (1 to 2)          | 3.7 (2 to 6)        | 9.5 (-22.5 to 51.9)  | 165 (103 to 245)          | 420.1 (268.2 to 609.4)    | 9.4 (-13.9 to 36)     |
|                                 | Larynx cancer | Both   | 0 (0 to 1)          | 0.6 (0.4 to 0.9)    | 3.9 (-18.1 to 29.6)  | 20 (13 to 27)             | 25.8 (17.7 to 34.2)       | -2.2 (-25.1 to 23.3)  |
|                                 |               | Male   | 0 (0 to 1)          | 1 (0.6 to 1.5)      | 3.5 (-22.6 to 33.1)  | 15 (9 to 21)              | 41.9 (27.7 to 56.6)       | -2.8 (-28.6 to 25.4)  |
|                                 |               | Female | 0 (0 to 0)          | 0.3 (0.2 to 0.5)    | 3.8 (-18.9 to 31.9)  | 5 (4 to 8)                | 12.4 (8.8 to 17.4)        | -1.6 (-25.8 to 29.3)  |
| Monaco                          | TBL cancer    | Both   | 16 (11 to 22)       | 18.8 (12.6 to 25.6) | -4.8 (-23.4 to 16.7) | 1190 (963 to 1430)        | 1464.5 (1166.8 to 1793.9) | -7.1 (-24.2 to 11.4)  |
|                                 |               | Male   | 10 (7 to 14)        | 24.8 (16.9 to 33.7) | -5.7 (-24.3 to 15.7) | 771 (637 to 918)          | 1961.7 (1590.8 to 2361.7) | -7.8 (-24.1 to 9.7)   |
|                                 |               | Female | 6 (4 to 8)          | 13.3 (8.4 to 18.8)  | -4 (-28.4 to 26.5)   | 419 (311 to 526)          | 1007.3 (741.8 to 1279.5)  | -6.6 (-26.9 to 17.2)  |
|                                 | Larynx cancer | Both   | 5 (3 to 7)          | 6.1 (4 to 8.6)      | -6.8 (-27.8 to 20.3) | 62 (49 to 76)             | 81.7 (63.7 to 102)        | -10.8 (-29.8 to 13.1) |
|                                 |               | Male   | 4 (3 to 6)          | 11.4 (7.5 to 16.2)  | -7 (-28.4 to 21.6)   | 56 (45 to 69)             | 153 (119.1 to 191.1)      | -10.7 (-30.4 to 13.8) |

|            |               |        |                    |                     |                      |                           |                           |                       |
|------------|---------------|--------|--------------------|---------------------|----------------------|---------------------------|---------------------------|-----------------------|
|            |               | Female | 0 (0 to 1)         | 1 (0.6 to 1.5)      | -8.5 (-31.3 to 22.5) | 6 (4 to 8)                | 14.6 (10.5 to 19.3)       | -13.1 (-35.4 to 17.2) |
| Mongolia   | TBL cancer    | Both   | 151 (98 to 218)    | 6.8 (4.5 to 9.7)    | 1.2 (-23.4 to 33.7)  | 17400 (13300 to 23000)    | 720.8 (561.8 to 932.4)    | -0.6 (-21.9 to 26.6)  |
|            |               | Male   | 118 (75 to 176)    | 12.6 (8.1 to 18)    | 2.3 (-24.1 to 38.6)  | 13900 (10300 to 18500)    | 1322.7 (997.5 to 1725.7)  | 0.7 (-22.3 to 30.1)   |
|            |               | Female | 32 (20 to 47)      | 2.8 (1.8 to 4)      | 0.3 (-33 to 46.2)    | 3480 (2680 to 4570)       | 274.6 (214.1 to 353.8)    | -0.7 (-23.2 to 26.8)  |
|            | Larynx cancer | Both   | 18 (12 to 26)      | 0.9 (0.6 to 1.2)    | -2.2 (-25.9 to 27)   | 730 (556 to 959)          | 33.5 (25.5 to 43.4)       | -8.4 (-28 to 17.5)    |
|            |               | Male   | 15 (10 to 22)      | 1.8 (1.1 to 2.5)    | 1 (-25.5 to 35.5)    | 633 (474 to 834)          | 71.2 (53.3 to 92.2)       | -4.7 (-25.7 to 22.1)  |
|            |               | Female | 3 (2 to 4)         | 0.2 (0.2 to 0.4)    | -15.3 (-38.4 to 16)  | 97 (72 to 132)            | 8 (5.9 to 11.1)           | -22.9 (-43.3 to 5.6)  |
| Montenegro | TBL cancer    | Both   | 130 (86 to 180)    | 13.2 (8.7 to 18.2)  | -0.4 (-20.3 to 23.6) | 13000 (10500 to 15800)    | 1330.4 (1083 to 1618.7)   | -3.9 (-20.7 to 16.3)  |
|            |               | Male   | 97 (64 to 137)     | 21.2 (14.1 to 29.9) | -0.9 (-24.6 to 28)   | 9770 (7800 to 12200)      | 2136.1 (1709.4 to 2653.8) | -4.3 (-22.4 to 17.2)  |
|            |               | Female | 33 (22 to 48)      | 6.4 (4.2 to 9.2)    | 0.7 (-23.5 to 31.3)  | 3180 (2550 to 3900)       | 632.8 (506 to 775.5)      | -3.2 (-21.5 to 17.6)  |
|            | Larynx cancer | Both   | 44 (30 to 62)      | 4.6 (3.2 to 6.4)    | -0.1 (-22.4 to 28.3) | 1200 (968 to 1480)        | 125.4 (101.2 to 155.6)    | -9.7 (-26.4 to 11.7)  |
|            |               | Male   | 34 (22 to 48)      | 7.3 (4.9 to 10.4)   | 1.2 (-25.5 to 35.7)  | 961 (762 to 1220)         | 211.1 (167.3 to 265.9)    | -8.4 (-26.5 to 15.3)  |
|            |               | Female | 11 (7 to 15)       | 2.2 (1.5 to 3.1)    | -4.7 (-26 to 19.2)   | 238 (193 to 288)          | 48.8 (39.5 to 59.6)       | -15 (-31.7 to 5)      |
| Morocco    | TBL cancer    | Both   | 1220 (747 to 1810) | 3.7 (2.3 to 5.5)    | 9.9 (-20.3 to 47.5)  | 141000 (102000 to 184000) | 415.2 (300 to 537.1)      | 9.6 (-14.5 to 40.1)   |
|            |               | Male   | 1060 (643 to 1600) | 6.4 (3.9 to 9.5)    | 8.1 (-24.2 to 50.4)  | 124000 (88400 to 165000)  | 730.4 (523.3 to 953.7)    | 7.9 (-16.7 to 39.5)   |
|            |               | Female | 162 (102 to 237)   | 1 (0.6 to 1.5)      | 17.1 (-10.1 to 55.3) | 17100 (12400 to 22300)    | 101.7 (73.8 to 131.6)     | 14.9 (-9.5 to 45.8)   |
|            | Larynx cancer | Both   | 611 (387 to 888)   | 1.8 (1.2 to 2.6)    | 16.3 (-13.9 to 60.9) | 25500 (17900 to 32900)    | 74.4 (52.8 to 94.8)       | 4.4 (-18.5 to 36.6)   |
|            |               | Male   | 555 (348 to 808)   | 3.3 (2.1 to 4.8)    | 17.2 (-14.8 to 67)   | 23400 (16300 to 30500)    | 137.5 (97.1 to 176.4)     | 5.1 (-19.1 to 40.5)   |
|            |               | Female | 56 (35 to 83)      | 0.3 (0.2 to 0.5)    | 4 (-19.3 to 35.1)    | 2080 (1510 to 2810)       | 11.8 (8.7 to 15.6)        | -9.6 (-31.3 to 20.7)  |
| Mozambique | TBL cancer    | Both   | 200 (122 to 302)   | 1.9 (1.2 to 2.8)    | 6.6 (-22.3 to 40.5)  | 23300 (17100 to 31500)    | 202 (149.8 to 268.8)      | 6.1 (-14.5 to 31.3)   |
|            |               | Male   | 136 (83 to 207)    | 3 (1.8 to 4.5)      | 1.6 (-28.5 to 41)    | 16000 (12100 to 21300)    | 321.2 (247 to 418)        | 0.7 (-18.5 to 23.9)   |
|            |               | Female | 64 (35 to 106)     | 1.1 (0.6 to 1.7)    | 22 (-16.9 to 74.3)   | 7280 (4590 to 11000)      | 110.1 (69.3 to 165.7)     | 23.3 (-12.8 to 68.7)  |
|            | Larynx cancer | Both   | 104 (67 to 150)    | 0.9 (0.5 to 1.2)    | -1.5 (-23.2 to 24.1) | 5910 (4390 to 7710)       | 46.2 (35 to 59.9)         | -4.6 (-27 to 19.7)    |
|            |               | Male   | 84 (54 to 122)     | 1.6 (1 to 2.2)      | -1.4 (-23.3 to 24.9) | 4880 (3660 to 6380)       | 84.4 (64.7 to 109.6)      | -4.5 (-27.1 to 20.1)  |

|         |               |        |                     |                   |                      |                           |                          |                       |
|---------|---------------|--------|---------------------|-------------------|----------------------|---------------------------|--------------------------|-----------------------|
|         |               | Female | 20 (12 to 30)       | 0.3 (0.2 to 0.4)  | 1.8 (-25 to 36.2)    | 1040 (666 to 1480)        | 14.5 (9.5 to 20.7)       | -1.3 (-30 to 38.2)    |
| Myanmar | TBL cancer    | Both   | 2330 (1470 to 3600) | 5 (3.2 to 7.6)    | -0.1 (-23.4 to 28.3) | 269000 (198000 to 372000) | 551.1 (405.1 to 754.8)   | -2.5 (-20 to 20.6)    |
|         |               | Male   | 1570 (938 to 2610)  | 7.7 (4.7 to 12.8) | -0.8 (-27.3 to 33)   | 183000 (129000 to 273000) | 857.2 (608.7 to 1269.2)  | -3.1 (-21.9 to 23.2)  |
|         |               | Female | 758 (472 to 1130)   | 2.9 (1.8 to 4.2)  | 5 (-26.5 to 43.5)    | 86300 (66100 to 115000)   | 315.8 (243.4 to 416.4)   | 2.2 (-16.8 to 26.6)   |
|         | Larynx cancer | Both   | 291 (197 to 416)    | 0.6 (0.4 to 0.9)  | -2.7 (-20.1 to 18.2) | 12100 (9520 to 15900)     | 24.7 (19.7 to 32.6)      | -13.2 (-29.6 to 6.2)  |
|         |               | Male   | 220 (145 to 320)    | 1.1 (0.7 to 1.5)  | 2.5 (-19 to 31.3)    | 9380 (7280 to 12800)      | 43.6 (34.3 to 58.7)      | -8.6 (-26.8 to 13.6)  |
|         |               | Female | 71 (48 to 100)      | 0.3 (0.2 to 0.4)  | -11.9 (-27.9 to 7.1) | 2730 (2080 to 3630)       | 10.1 (7.7 to 13.4)       | -22 (-38.9 to -0.7)   |
| Namibia | TBL cancer    | Both   | 25 (15 to 36)       | 1.8 (1.1 to 2.5)  | 6.8 (-17.7 to 42.3)  | 2740 (2070 to 3580)       | 187.6 (144.8 to 240.5)   | 5.6 (-13.8 to 29.5)   |
|         |               | Male   | 17 (10 to 24)       | 2.8 (1.8 to 4.2)  | 4.9 (-23.5 to 44.9)  | 1870 (1420 to 2380)       | 301.9 (233.8 to 377.5)   | 3.2 (-15.4 to 24.8)   |
|         |               | Female | 8 (5 to 13)         | 1 (0.6 to 1.6)    | 14.6 (-22.5 to 64.8) | 872 (593 to 1250)         | 104.3 (71.4 to 147.6)    | 14.8 (-16.5 to 57.9)  |
|         | Larynx cancer | Both   | 23 (15 to 33)       | 1.5 (1 to 2.2)    | 5.2 (-19.4 to 36)    | 1130 (843 to 1510)        | 72.9 (55.4 to 96.1)      | -3.8 (-24.4 to 21.7)  |
|         |               | Male   | 18 (12 to 27)       | 2.8 (1.8 to 4.1)  | 7.6 (-20 to 43.1)    | 935 (704 to 1240)         | 138.7 (106.6 to 180.5)   | -1.6 (-21.4 to 23.1)  |
|         |               | Female | 4 (3 to 7)          | 0.5 (0.3 to 0.8)  | 0.8 (-27.2 to 40.5)  | 190 (124 to 282)          | 22 (14.6 to 32.6)        | -9.1 (-36.7 to 28.1)  |
| Nauru   | TBL cancer    | Both   | 0 (0 to 1)          | 8.4 (4.7 to 12.6) | -1.4 (-25.3 to 27.6) | 48 (28 to 67)             | 947 (598.7 to 1267.8)    | -2.8 (-24.1 to 20.2)  |
|         |               | Male   | 0 (0 to 0)          | 12.7 (7 to 19.7)  | -0.2 (-26.2 to 35.2) | 34 (19 to 49)             | 1445.8 (883.9 to 2021.1) | -1.9 (-24.3 to 24)    |
|         |               | Female | 0 (0 to 0)          | 4.7 (2.5 to 7.8)  | 19 (-14.6 to 69.8)   | 14 (8 to 22)              | 537.3 (326.9 to 790.5)   | 16.4 (-7.6 to 46.3)   |
|         | Larynx cancer | Both   | 0 (0 to 0)          | 0.8 (0.5 to 1.2)  | -10.3 (-28 to 13.1)  | 1 (1 to 2)                | 29.7 (22.8 to 37.7)      | -22.4 (-36.2 to -3.4) |
|         |               | Male   | 0 (0 to 0)          | 1.4 (0.9 to 2)    | -3 (-24.4 to 27.2)   | 1 (1 to 2)                | 49.6 (35.4 to 65.3)      | -16.3 (-33 to 6.4)    |
|         |               | Female | 0 (0 to 0)          | 0.4 (0.2 to 0.6)  | -5.3 (-26.5 to 23.6) | 0 (0 to 1)                | 12.7 (8.9 to 17.5)       | -18.5 (-37.4 to 10.5) |
| Nepal   | TBL cancer    | Both   | 413 (254 to 614)    | 1.9 (1.1 to 2.7)  | 14.2 (-15 to 53.2)   | 44800 (32000 to 58700)    | 193.2 (138.5 to 251.1)   | 12.8 (-11.6 to 40.7)  |
|         |               | Male   | 279 (163 to 418)    | 2.6 (1.6 to 3.9)  | 13.5 (-20.6 to 59.9) | 30200 (21500 to 39200)    | 274.5 (196.7 to 354.1)   | 12.2 (-12.7 to 38.7)  |
|         |               | Female | 134 (75 to 216)     | 1.1 (0.6 to 1.8)  | 22.1 (-13.2 to 74.8) | 14600 (9820 to 20800)     | 118.7 (79.7 to 169.8)    | 20.5 (-5.7 to 57.2)   |
|         | Larynx cancer | Both   | 296 (193 to 448)    | 1.3 (0.8 to 1.9)  | 13.6 (-10.3 to 48.3) | 14500 (10900 to 19900)    | 61.4 (46.1 to 82.9)      | 9.1 (-13.4 to 34.6)   |
|         |               | Male   | 229 (145 to 357)    | 2.1 (1.3 to 3.2)  | 18.2 (-10.5 to 59.9) | 11400 (8220 to 16000)     | 101.8 (73.9 to 142.3)    | 14.6 (-11.5 to 44.8)  |

|             |               |        |                     |                    |                      |                           |                         |                        |
|-------------|---------------|--------|---------------------|--------------------|----------------------|---------------------------|-------------------------|------------------------|
|             |               | Female | 66 (43 to 97)       | 0.5 (0.4 to 0.8)   | 9.6 (-15.6 to 42.8)  | 3130 (2280 to 4150)       | 24.6 (18 to 32.5)       | 2.4 (-20.2 to 32.5)    |
| Netherlands | TBL cancer    | Both   | 3680 (2490 to 5160) | 11.1 (7.4 to 15.7) | -9.1 (-31.3 to 18.8) | 262000 (246000 to 278000) | 814.2 (767.6 to 862.1)  | -13.3 (-17.5 to -8.3)  |
|             |               | Male   | 2130 (1420 to 3010) | 13.4 (8.9 to 19)   | -16.8 (-38 to 10.3)  | 153000 (143000 to 163000) | 974.4 (912.2 to 1037.7) | -19.5 (-24.5 to -14.2) |
|             |               | Female | 1560 (1040 to 2230) | 9.4 (6.2 to 13.5)  | -0.1 (-26 to 33.6)   | 109000 (99900 to 118000)  | 681.6 (627 to 736.4)    | -6.1 (-13.3 to 1.7)    |
|             | Larynx cancer | Both   | 475 (314 to 686)    | 1.5 (1 to 2.2)     | -4.9 (-28.7 to 21.7) | 5480 (4960 to 6000)       | 17.4 (15.8 to 19.1)     | -12.5 (-20.7 to -3.3)  |
|             |               | Male   | 397 (259 to 581)    | 2.6 (1.7 to 3.8)   | -7 (-31.2 to 22)     | 4430 (3970 to 4890)       | 29.1 (26.3 to 32.3)     | -14.5 (-23.3 to -3.9)  |
|             |               | Female | 78 (46 to 115)      | 0.5 (0.3 to 0.8)   | -2.8 (-26.8 to 25.6) | 1050 (685 to 1220)        | 6.6 (4.4 to 7.7)        | -10.4 (-22.2 to 2.8)   |
| New Zealand | TBL cancer    | Both   | 624 (439 to 833)    | 8.1 (5.7 to 10.8)  | -3.7 (-21.8 to 17.2) | 40300 (38000 to 42600)    | 542.3 (511 to 571.1)    | -7.6 (-12.7 to -2.6)   |
|             |               | Male   | 326 (218 to 453)    | 8.9 (6 to 12.4)    | -7.6 (-32.6 to 22.5) | 20700 (19400 to 22100)    | 582.3 (543.6 to 619.7)  | -11 (-16.8 to -5.1)    |
|             |               | Female | 298 (200 to 414)    | 7.4 (5 to 10.3)    | 0.1 (-26.2 to 30.4)  | 19600 (18000 to 21300)    | 508.4 (469.9 to 550.8)  | -4.3 (-11.7 to 4.2)    |
|             | Larynx cancer | Both   | 70 (46 to 100)      | 0.9 (0.6 to 1.3)   | -4.5 (-28.8 to 24.3) | 760 (694 to 826)          | 10.4 (9.6 to 11.2)      | -11.8 (-19.1 to -3.9)  |
|             |               | Male   | 64 (40 to 93)       | 1.8 (1.1 to 2.6)   | -4.7 (-30.9 to 26.1) | 586 (529 to 645)          | 16.8 (15.3 to 18.5)     | -11.7 (-20.8 to -1.7)  |
|             |               | Female | 6 (4 to 9)          | 0.2 (0.1 to 0.2)   | -5.4 (-23.3 to 15.6) | 175 (150 to 205)          | 4.7 (4 to 5.4)          | -11.9 (-22.5 to 0.4)   |
| Nicaragua   | TBL cancer    | Both   | 85 (57 to 119)      | 2 (1.3 to 2.8)     | -1.2 (-25.7 to 26.7) | 8370 (6760 to 10200)      | 186.2 (151.7 to 225.7)  | -3.2 (-21.1 to 18.1)   |
|             |               | Male   | 50 (32 to 71)       | 2.6 (1.7 to 3.8)   | -1.7 (-31.1 to 37.1) | 5070 (3940 to 6290)       | 254.7 (199.6 to 312.1)  | -3.5 (-23.4 to 20.4)   |
|             |               | Female | 36 (23 to 50)       | 1.5 (1 to 2.1)     | 2.6 (-24.8 to 40.2)  | 3300 (2680 to 4000)       | 131.7 (108.2 to 158.6)  | 0.4 (-17.4 to 21.7)    |
|             | Larynx cancer | Both   | 36 (24 to 50)       | 0.8 (0.5 to 1.1)   | 4 (-22 to 36.1)      | 1140 (884 to 1450)        | 25.8 (20.1 to 32.7)     | -6.7 (-27.1 to 18.8)   |
|             |               | Male   | 29 (19 to 42)       | 1.5 (1 to 2.2)     | 9.3 (-21.2 to 48.8)  | 1010 (769 to 1290)        | 51.1 (39.4 to 65.4)     | -2.1 (-24.5 to 26.4)   |
|             |               | Female | 6 (4 to 8)          | 0.2 (0.2 to 0.3)   | -5.3 (-20.7 to 14.5) | 136 (108 to 170)          | 5.5 (4.4 to 6.8)        | -17.2 (-33.9 to 4.8)   |
| Niger       | TBL cancer    | Both   | 154 (84 to 243)     | 2.1 (1.1 to 3.2)   | 7.1 (-18.4 to 40.4)  | 17300 (10700 to 25100)    | 212.9 (134.6 to 307.9)  | 8.6 (-12 to 35.5)      |
|             |               | Male   | 119 (64 to 198)     | 3.3 (1.8 to 5.5)   | 7.9 (-20.7 to 46.9)  | 13500 (8320 to 20900)     | 345.4 (212.7 to 525.5)  | 8.9 (-11.9 to 36.7)    |
|             |               | Female | 34 (18 to 59)       | 0.9 (0.4 to 1.5)   | 11.6 (-14.2 to 43.7) | 3820 (2320 to 6090)       | 87.2 (53.6 to 137.6)    | 14.7 (-6.8 to 41.7)    |
|             | Larynx cancer | Both   | 40 (25 to 58)       | 0.5 (0.3 to 0.7)   | 3.4 (-17.1 to 31.7)  | 2030 (1440 to 2700)       | 24.5 (17.6 to 32.2)     | 2.5 (-17.4 to 30.6)    |

|                          |               |        |                    |                   |                        |                           |                           |                        |
|--------------------------|---------------|--------|--------------------|-------------------|------------------------|---------------------------|---------------------------|------------------------|
|                          |               | Male   | 35 (21 to 51)      | 0.9 (0.6 to 1.3)  | 5.4 (-17.5 to 37.9)    | 1770 (1230 to 2410)       | 43.9 (31 to 58.4)         | 4.6 (-17.1 to 33.6)    |
|                          |               | Female | 5 (3 to 8)         | 0.1 (0.1 to 0.2)  | 1.2 (-20.9 to 29.2)    | 262 (183 to 350)          | 6 (4.2 to 7.9)            | -0.6 (-23.5 to 28.5)   |
| Nigeria                  | TBL cancer    | Both   | 1380 (880 to 1970) | 1.7 (1.1 to 2.4)  | -1.7 (-28 to 34.8)     | 150000 (112000 to 199000) | 171 (130.1 to 226.6)      | -2.7 (-28.9 to 34.8)   |
|                          |               | Male   | 926 (577 to 1410)  | 2.4 (1.5 to 3.6)  | -3.3 (-35 to 48.1)     | 100000 (69700 to 146000)  | 247.8 (174.9 to 355)      | -4.1 (-35.5 to 48)     |
|                          |               | Female | 449 (275 to 671)   | 1 (0.6 to 1.5)    | 21.4 (-17.1 to 73.7)   | 49400 (34100 to 69600)    | 101.2 (71.1 to 137.9)     | 22.6 (-17.2 to 85.2)   |
|                          | Larynx cancer | Both   | 557 (363 to 823)   | 0.6 (0.4 to 0.9)  | -14.8 (-39.4 to 22.4)  | 27300 (19100 to 39600)    | 28 (20 to 39.2)           | -17.9 (-44.7 to 25.8)  |
|                          |               | Male   | 514 (330 to 775)   | 1.2 (0.8 to 1.8)  | -6.3 (-35.1 to 38.3)   | 26100 (18000 to 38000)    | 57.2 (40.2 to 81.5)       | -8.9 (-40 to 42.6)     |
|                          |               | Female | 43 (26 to 64)      | 0.1 (0 to 0.1)    | -3 (-27.1 to 27.6)     | 1240 (857 to 1750)        | 2.4 (1.7 to 3.3)          | -5.2 (-33.6 to 42.8)   |
| Niue                     | TBL cancer    | Both   | 0 (0 to 0)         | 6.6 (4.5 to 9.2)  | -0.6 (-18.7 to 21.4)   | 15 (12 to 19)             | 710.7 (560.4 to 890.1)    | -0.8 (-14.3 to 14.7)   |
|                          |               | Male   | 0 (0 to 0)         | 9.6 (6.6 to 13)   | -2 (-20.6 to 23.3)     | 10 (8 to 13)              | 1026.4 (832.1 to 1232.7)  | -2.3 (-14.9 to 13)     |
|                          |               | Female | 0 (0 to 0)         | 4.2 (2.6 to 6.3)  | 2.7 (-25.5 to 38)      | 5 (4 to 7)                | 441.7 (312.4 to 597.6)    | 2.1 (-17.6 to 26.6)    |
|                          | Larynx cancer | Both   | 0 (0 to 0)         | 0.6 (0.4 to 0.9)  | -2.7 (-19.1 to 15.4)   | 0 (0 to 0)                | 16.8 (13.4 to 20.9)       | -8.3 (-22.1 to 7)      |
|                          |               | Male   | 0 (0 to 0)         | 1.1 (0.7 to 1.5)  | -1.2 (-20.1 to 20.8)   | 0 (0 to 0)                | 29.4 (23.3 to 36.8)       | -6.8 (-21.3 to 10.4)   |
|                          |               | Female | 0 (0 to 0)         | 0.2 (0.2 to 0.4)  | -5.2 (-26.3 to 21.6)   | 0 (0 to 0)                | 6.8 (5 to 9.3)            | -10.6 (-32.4 to 18)    |
| North Macedonia          | TBL cancer    | Both   | 310 (204 to 443)   | 9.3 (6.1 to 13.3) | -3.6 (-29.8 to 26.7)   | 32800 (25000 to 42100)    | 991.1 (753.4 to 1273.7)   | -5.9 (-29.3 to 20.4)   |
|                          |               | Male   | 249 (162 to 355)   | 15.4 (10 to 21.9) | -6.5 (-32.8 to 25.1)   | 26700 (20000 to 34700)    | 1635.6 (1229.1 to 2122)   | -8.5 (-31.8 to 17.4)   |
|                          |               | Female | 60 (38 to 88)      | 3.7 (2.3 to 5.3)  | 3.4 (-26.8 to 43.3)    | 6100 (4710 to 7860)       | 373.9 (287.8 to 482.4)    | 0.6 (-23.4 to 29.6)    |
|                          | Larynx cancer | Both   | 97 (64 to 138)     | 3 (2 to 4.2)      | -6.4 (-30.8 to 24.1)   | 3050 (2320 to 3940)       | 93 (70.8 to 120.1)        | -13.6 (-33.8 to 10.6)  |
|                          |               | Male   | 86 (55 to 123)     | 5.3 (3.5 to 7.6)  | -8.2 (-33.1 to 24)     | 2800 (2120 to 3630)       | 173.9 (132.1 to 225.2)    | -14.9 (-34.8 to 9.5)   |
|                          |               | Female | 12 (8 to 17)       | 0.8 (0.5 to 1.1)  | -2.3 (-22.3 to 24.8)   | 252 (192 to 326)          | 15.6 (11.9 to 20.3)       | -11.8 (-32.8 to 14.7)  |
| Northern Mariana Islands | TBL cancer    | Both   | 5 (4 to 7)         | 9.8 (6.9 to 13)   | -5.1 (-20.3 to 13.4)   | 567 (476 to 654)          | 1011.9 (867.5 to 1150.3)  | -5.3 (-17.6 to 8.2)    |
|                          |               | Male   | 4 (3 to 5)         | 15 (10.6 to 19.8) | -3.5 (-20.3 to 16.6)   | 433 (363 to 498)          | 1531.9 (1323.8 to 1727.6) | -4.3 (-17.2 to 10.4)   |
|                          |               | Female | 1 (1 to 2)         | 4.7 (3.1 to 6.8)  | 3 (-25.6 to 40.4)      | 134 (106 to 170)          | 482.2 (386.9 to 603.7)    | 3.6 (-15.4 to 27.6)    |
|                          | Larynx cancer | Both   | 0 (0 to 0)         | 0.6 (0.4 to 0.9)  | -34.2 (-46.7 to -14.2) | 8 (6 to 10)               | 13.8 (11.4 to 17.8)       | -39.1 (-49.3 to -22.2) |
|                          |               | Male   | 0 (0 to 0)         | 0.9 (0.6 to 1.4)  | -33.6 (-48.3 to -6.7)  | 5 (4 to 7)                | 20.7 (17.1 to 27)         | -38.7 (-50.4 to -21.3) |

|           |               |        |                     |                   |                       |                           |                          |                        |
|-----------|---------------|--------|---------------------|-------------------|-----------------------|---------------------------|--------------------------|------------------------|
|           |               | Female | 0 (0 to 0)          | 0.3 (0.2 to 0.4)  | -24.4 (-44.2 to 1.7)  | 2 (2 to 3)                | 7.5 (5.8 to 9.6)         | -29.1 (-45.3 to -6.6)  |
| Norway    | TBL cancer    | Both   | 754 (529 to 996)    | 8 (5.6 to 10.6)   | -16.1 (-29.4 to -1.8) | 46500 (43800 to 48900)    | 511.5 (482.4 to 537.2)   | -17.3 (-20.9 to -14.3) |
|           |               | Male   | 406 (278 to 555)    | 9 (6.1 to 12.4)   | -22.8 (-38.9 to -3.1) | 25400 (23700 to 26900)    | 571.3 (532.4 to 606.5)   | -25 (-29.3 to -21.1)   |
|           |               | Female | 347 (237 to 474)    | 7.2 (4.9 to 10)   | -8.2 (-26.3 to 13.5)  | 21200 (19700 to 22600)    | 459.6 (428.5 to 488.9)   | -7.2 (-12.4 to -1.7)   |
|           | Larynx cancer | Both   | 94 (64 to 129)      | 1.1 (0.7 to 1.5)  | -10.8 (-26.5 to 7.8)  | 792 (746 to 860)          | 8.9 (8.4 to 9.7)         | -18.1 (-22.1 to -10.7) |
|           |               | Male   | 80 (54 to 113)      | 1.9 (1.2 to 2.6)  | -13.2 (-30.6 to 8.5)  | 629 (590 to 690)          | 14.5 (13.6 to 15.9)      | -20.8 (-25.4 to -13)   |
|           |               | Female | 13 (9 to 19)        | 0.3 (0.2 to 0.5)  | -5.7 (-20.5 to 12.1)  | 163 (139 to 182)          | 3.7 (3.2 to 4.1)         | -11.9 (-18.6 to -2.5)  |
| Oman      | TBL cancer    | Both   | 35 (23 to 53)       | 2.2 (1.5 to 3.2)  | -17.4 (-38.8 to 11.1) | 3840 (2970 to 5200)       | 209.5 (168.4 to 265.1)   | -23.1 (-37.7 to -0.6)  |
|           |               | Male   | 24 (15 to 38)       | 2.8 (1.8 to 4.2)  | -20.9 (-45.9 to 15.5) | 2730 (2000 to 4040)       | 271.5 (209.5 to 363)     | -25.8 (-42.5 to 1.1)   |
|           |               | Female | 11 (7 to 16)        | 1.6 (1 to 2.3)    | -3 (-34.5 to 40.1)    | 1110 (794 to 1360)        | 140.2 (103 to 167.8)     | -10.2 (-32.7 to 11.9)  |
|           | Larynx cancer | Both   | 14 (9 to 19)        | 0.7 (0.5 to 0.9)  | -20.6 (-34.2 to -3.4) | 284 (225 to 356)          | 14.4 (11.9 to 17.6)      | -36.2 (-47.9 to -22.6) |
|           |               | Male   | 12 (8 to 17)        | 1.1 (0.7 to 1.5)  | -19.6 (-34.9 to 0.1)  | 249 (191 to 322)          | 22.8 (18.4 to 28.2)      | -35.2 (-48.3 to -19.9) |
|           |               | Female | 2 (1 to 3)          | 0.2 (0.1 to 0.3)  | -16.9 (-32.7 to 3.2)  | 35 (28 to 43)             | 4.2 (3.4 to 5.2)         | -32 (-46 to -14.1)     |
| Pakistan  | TBL cancer    | Both   | 4260 (2800 to 6130) | 3.7 (2.4 to 5.3)  | -4.9 (-31.2 to 33.5)  | 518000 (396000 to 675000) | 422 (322.8 to 547.2)     | -6.2 (-29.8 to 26.9)   |
|           |               | Male   | 3540 (2210 to 5260) | 5.9 (3.7 to 8.8)  | -6.6 (-36.2 to 36.8)  | 433000 (315000 to 588000) | 684 (499.6 to 921.8)     | -8 (-35.3 to 30.1)     |
|           |               | Female | 717 (437 to 1040)   | 1.3 (0.8 to 1.9)  | 10.1 (-23.2 to 58.3)  | 85000 (61500 to 113000)   | 140.5 (102.9 to 187.7)   | 10.4 (-17.9 to 51.2)   |
|           | Larynx cancer | Both   | 3520 (2320 to 4920) | 2.9 (1.9 to 4)    | -5.6 (-31.3 to 28.8)  | 197000 (150000 to 261000) | 152.2 (116.6 to 199.9)   | -10.6 (-33.7 to 23)    |
|           |               | Male   | 2950 (1880 to 4220) | 4.7 (3 to 6.6)    | -5.1 (-35.6 to 36.3)  | 167000 (122000 to 231000) | 252.5 (183.7 to 345.1)   | -10 (-36 to 29.5)      |
|           |               | Female | 570 (373 to 826)    | 0.9 (0.6 to 1.3)  | -3.8 (-27.7 to 33.4)  | 29100 (21700 to 39000)    | 44.5 (33.9 to 59)        | -9.1 (-32.8 to 25.2)   |
| Palau     | TBL cancer    | Both   | 2 (1 to 3)          | 9.7 (6.7 to 13.5) | 1.3 (-18.5 to 26.3)   | 244 (193 to 309)          | 1062.1 (847.7 to 1327.2) | 0.4 (-15.4 to 22)      |
|           |               | Male   | 1 (1 to 2)          | 10.5 (7 to 15.1)  | -1 (-23.9 to 27.7)    | 137 (108 to 175)          | 1155.5 (930.4 to 1450.9) | -2.2 (-19.1 to 18.9)   |
|           |               | Female | 1 (1 to 1)          | 8.8 (5.8 to 12.4) | 3.7 (-22.4 to 37.6)   | 107 (82 to 137)           | 956.2 (732.3 to 1212.1)  | 3.2 (-16.6 to 30.5)    |
|           | Larynx cancer | Both   | 0 (0 to 0)          | 0.5 (0.3 to 0.7)  | -0.4 (-18.8 to 24.5)  | 3 (3 to 4)                | 13.8 (10.6 to 17.7)      | -5.5 (-23 to 18.4)     |
|           |               | Male   | 0 (0 to 0)          | 0.5 (0.3 to 0.7)  | 1.7 (-18.3 to 26.7)   | 1 (1 to 2)                | 12 (9.4 to 15.1)         | -4.2 (-22 to 19.1)     |
|           |               | Female | 0 (0 to 0)          | 0.6 (0.3 to 0.8)  | -1.5 (-26.8 to 35.2)  | 2 (1 to 3)                | 16.1 (11.4 to 22)        | -6.6 (-29.4 to 25.3)   |
| Palestine | TBL cancer    | Both   | 120 (82 to 163)     | 5 (3.4 to 6.7)    | 16.4 (-8.3 to 48.8)   | 14100 (11900 to 16500)    | 541.4 (458.6 to 634.4)   | 16.3 (-4.2 to 38.1)    |



|                  |               |        |                   |                   |                       |                         |                         |                       |
|------------------|---------------|--------|-------------------|-------------------|-----------------------|-------------------------|-------------------------|-----------------------|
|                  |               | Male   | 92 (63 to 127)    | 8.2 (5.5 to 11.1) | 9.7 (-17.6 to 42.7)   | 11100 (9390 to 13000)   | 893.4 (760.7 to 1035)   | 10.7 (-9.2 to 32.6)   |
|                  |               | Female | 27 (19 to 39)     | 2.1 (1.4 to 3)    | 27.5 (-7.4 to 79.1)   | 3020 (2470 to 3640)     | 217.5 (177 to 262.5)    | 23.1 (-2.7 to 53.7)   |
|                  | Larynx cancer | Both   | 18 (12 to 24)     | 0.7 (0.5 to 1)    | 10.6 (-12.5 to 36.2)  | 544 (444 to 657)        | 21.7 (17.9 to 26.3)     | -3.3 (-21.5 to 17.8)  |
|                  |               | Male   | 16 (11 to 22)     | 1.3 (0.9 to 1.8)  | 6.2 (-16.8 to 32.6)   | 499 (403 to 606)        | 41.8 (34.2 to 50.5)     | -7 (-24.9 to 14.2)    |
|                  |               | Female | 2 (1 to 2)        | 0.1 (0.1 to 0.2)  | 9.8 (-11.1 to 34.2)   | 45 (36 to 55)           | 3.3 (2.7 to 4.1)        | -4.8 (-24.7 to 19.2)  |
| Panama           | TBL cancer    | Both   | 105 (67 to 154)   | 2.6 (1.6 to 3.7)  | 2.1 (-25.5 to 38.8)   | 9650 (7360 to 12400)    | 233.3 (177.8 to 299.2)  | -1.2 (-24.3 to 28.4)  |
|                  |               | Male   | 64 (40 to 95)     | 3.2 (2 to 4.8)    | -6.1 (-34.9 to 32.6)  | 6160 (4640 to 8040)     | 305.1 (229.9 to 397.6)  | -7.3 (-30.8 to 22.4)  |
|                  |               | Female | 41 (26 to 60)     | 1.9 (1.2 to 2.8)  | 18.9 (-19.8 to 70)    | 3490 (2690 to 4490)     | 165 (127.4 to 212.3)    | 12.7 (-13.7 to 47.4)  |
|                  | Larynx cancer | Both   | 32 (20 to 46)     | 0.8 (0.5 to 1.1)  | -10.4 (-33.9 to 19.2) | 951 (701 to 1260)       | 22.9 (16.9 to 30.3)     | -22.6 (-43.4 to 3)    |
|                  |               | Male   | 28 (18 to 40)     | 1.4 (0.9 to 2)    | -10.1 (-35.2 to 21.6) | 852 (620 to 1130)       | 41.9 (30.6 to 55.8)     | -22.1 (-43.7 to 4)    |
|                  |               | Female | 4 (3 to 6)        | 0.2 (0.1 to 0.3)  | -7.5 (-26.3 to 16.2)  | 100 (74 to 133)         | 4.7 (3.5 to 6.3)        | -21.9 (-41.8 to 2.9)  |
| Papua New Guinea | TBL cancer    | Both   | 228 (131 to 364)  | 4.8 (2.8 to 7.5)  | 3.8 (-18.1 to 29.9)   | 28400 (19400 to 43500)  | 539.9 (379.9 to 819.6)  | 2.9 (-14.1 to 25.4)   |
|                  |               | Male   | 184 (103 to 305)  | 7.3 (4.2 to 12.1) | 1.7 (-21.7 to 33)     | 23000 (15700 to 36300)  | 829.8 (574.9 to 1296.7) | 1.3 (-16.8 to 24.7)   |
|                  |               | Female | 44 (23 to 76)     | 1.9 (1 to 3.4)    | 11.5 (-24.8 to 72.1)  | 5370 (3360 to 8590)     | 216.2 (136.2 to 345.9)  | 10.5 (-12.2 to 39.2)  |
|                  | Larynx cancer | Both   | 20 (13 to 29)     | 0.4 (0.3 to 0.6)  | -1.2 (-18.8 to 18.4)  | 973 (698 to 1330)       | 19.1 (13.9 to 25.6)     | -4.5 (-20.7 to 14.6)  |
|                  |               | Male   | 15 (10 to 22)     | 0.6 (0.4 to 0.9)  | -1.8 (-22.3 to 22.1)  | 751 (521 to 1050)       | 28.9 (20.6 to 39.2)     | -4.6 (-23 to 18.5)    |
|                  |               | Female | 5 (3 to 7)        | 0.2 (0.1 to 0.3)  | -2.7 (-25.1 to 27)    | 222 (150 to 318)        | 8.5 (5.8 to 12.2)       | -5.8 (-28.8 to 26.6)  |
| Paraguay         | TBL cancer    | Both   | 197 (124 to 290)  | 3.6 (2.3 to 5.2)  | 1.8 (-28.5 to 42.5)   | 20700 (15500 to 26700)  | 364.5 (273.9 to 470.7)  | -0.1 (-26.2 to 31.6)  |
|                  |               | Male   | 149 (91 to 220)   | 5.7 (3.5 to 8.3)  | 0.1 (-32.4 to 43.9)   | 15800 (11800 to 20700)  | 579.3 (435.7 to 756.3)  | -1.6 (-28.1 to 31.2)  |
|                  |               | Female | 49 (30 to 73)     | 1.7 (1.1 to 2.5)  | 8.6 (-26.3 to 58.5)   | 4850 (3610 to 6310)     | 164.5 (122.5 to 214.2)  | 6.3 (-22.4 to 42.8)   |
|                  | Larynx cancer | Both   | 56 (36 to 83)     | 1 (0.6 to 1.5)    | 16.9 (-15 to 59.7)    | 2180 (1600 to 2890)     | 37.6 (27.7 to 49.9)     | 5.5 (-23.7 to 42.9)   |
|                  |               | Male   | 51 (33 to 76)     | 1.9 (1.2 to 2.8)  | 17.1 (-15.6 to 62.1)  | 2020 (1470 to 2690)     | 71.5 (52.4 to 94.9)     | 5.9 (-23.8 to 44.3)   |
|                  |               | Female | 5 (3 to 7)        | 0.2 (0.1 to 0.2)  | 17.3 (-13.1 to 55.8)  | 158 (117 to 206)        | 5.3 (4 to 7)            | 4.7 (-23.8 to 41.9)   |
| Peru             | TBL cancer    | Both   | 777 (485 to 1160) | 2.4 (1.5 to 3.6)  | -8.9 (-38.9 to 29.9)  | 76100 (56400 to 101000) | 235.8 (175 to 313.4)    | -12.3 (-38.8 to 23.9) |
|                  |               | Male   | 408 (247 to 617)  | 2.7 (1.6 to 4)    | -12.6 (-44.3 to 31.9) | 40300 (28500 to 54500)  | 258.9 (183.6 to 350.8)  | -15.3 (-43.5 to 22.5) |
|                  |               | Female | 369 (225 to 559)  | 2.2 (1.3 to 3.4)  | -4.2 (-36.6 to 40.8)  | 35800 (27000 to 47300)  | 214.2 (162.2 to 282.1)  | -8.4 (-35.3 to 28.8)  |

|             |               |                |                     |                      |                       |                           |                          |                        |
|-------------|---------------|----------------|---------------------|----------------------|-----------------------|---------------------------|--------------------------|------------------------|
|             | Larynx cancer | Both           | 116 (73 to 170)     | 0.4 (0.2 to 0.5)     | -6.6 (-34 to 30.6)    | 3750 (2720 to 5110)       | 11.7 (8.5 to 16)         | -19.1 (-44 to 13.6)    |
| Male        |               | 90 (57 to 133) | 0.6 (0.4 to 0.9)    | -5.2 (-35.1 to 36.5) | 2910 (2090 to 4070)   | 18.9 (13.6 to 26.4)       | -17.4 (-43.4 to 17.9)    |                        |
| Female      |               | 26 (16 to 38)  | 0.2 (0.1 to 0.2)    | -9.4 (-36.1 to 27.8) | 837 (609 to 1130)     | 5 (3.6 to 6.7)            | -23 (-47.7 to 9.8)       |                        |
| Philippines | TBL cancer    | Both           | 3190 (2120 to 4430) | 4 (2.7 to 5.5)       | 2.1 (-19.8 to 26.6)   | 370000 (297000 to 455000) | 439.6 (355.2 to 539.5)   | 1.3 (-19 to 24.8)      |
|             |               | Male           | 2180 (1410 to 3180) | 5.9 (3.9 to 8.5)     | -2.8 (-28.6 to 27.9)  | 256000 (193000 to 332000) | 652.3 (494.2 to 842.3)   | -3.8 (-27.7 to 25.5)   |
|             |               | Female         | 1000 (646 to 1450)  | 2.4 (1.5 to 3.4)     | 15.8 (-15.4 to 55.2)  | 114000 (85800 to 149000)  | 257.2 (195.2 to 333.9)   | 15.5 (-15.6 to 54.8)   |
|             | Larynx cancer | Both           | 517 (353 to 724)    | 0.6 (0.4 to 0.9)     | -0.3 (-19.8 to 22.2)  | 18300 (14500 to 23400)    | 21.7 (17.3 to 27.5)      | -5.2 (-25.5 to 19.2)   |
|             |               | Male           | 385 (257 to 557)    | 1 (0.7 to 1.5)       | 1.7 (-22.7 to 31.7)   | 15100 (11300 to 20000)    | 38.2 (28.8 to 50.2)      | -3.6 (-28.6 to 26.2)   |
|             |               | Female         | 132 (87 to 192)     | 0.3 (0.2 to 0.4)     | -4.5 (-19.3 to 13.1)  | 3230 (2450 to 4160)       | 7.4 (5.6 to 9.4)         | -10.9 (-32.3 to 15.5)  |
| Poland      | TBL cancer    | Both           | 6570 (4450 to 8870) | 9.5 (6.5 to 12.9)    | -6.3 (-22.5 to 12)    | 703000 (580000 to 840000) | 1042.2 (857.8 to 1248.5) | -8.5 (-24.4 to 10)     |
|             |               | Male           | 4530 (2950 to 6370) | 15.1 (9.8 to 21.2)   | -12.1 (-31.5 to 10.2) | 495000 (385000 to 622000) | 1641 (1276.6 to 2068.6)  | -14.2 (-33 to 8.3)     |
|             |               | Female         | 2040 (1370 to 2860) | 5.3 (3.5 to 7.5)     | 4.9 (-19.3 to 33.9)   | 208000 (163000 to 265000) | 565.8 (442.8 to 724.5)   | 3.9 (-18.2 to 32.9)    |
|             | Larynx cancer | Both           | 1440 (972 to 1950)  | 2.2 (1.5 to 3)       | -6.2 (-24.7 to 16.2)  | 44200 (35000 to 55000)    | 68.9 (54.5 to 86)        | -16.1 (-33.9 to 4.8)   |
|             |               | Male           | 1230 (810 to 1710)  | 4.2 (2.7 to 5.7)     | -8.7 (-28.5 to 16)    | 39800 (30400 to 50900)    | 134.8 (103.4 to 172.6)   | -17.8 (-37.3 to 4.8)   |
|             |               | Female         | 211 (139 to 304)    | 0.6 (0.4 to 0.9)     | -1.6 (-22.1 to 24.8)  | 4440 (3300 to 5650)       | 12.9 (9.5 to 16.4)       | -13.2 (-33.1 to 9.9)   |
| Portugal    | TBL cancer    | Both           | 1070 (691 to 1550)  | 5 (3.2 to 7.3)       | -10.9 (-34.7 to 19)   | 101000 (93700 to 107000)  | 500.6 (466.8 to 532.4)   | -12.1 (-18.6 to -5.7)  |
|             |               | Male           | 804 (516 to 1180)   | 8.4 (5.3 to 12.2)    | -14.7 (-38 to 15.9)   | 77200 (72000 to 82400)    | 836.1 (778.6 to 894.8)   | -15.7 (-22.2 to -9.2)  |
|             |               | Female         | 263 (162 to 391)    | 2.2 (1.4 to 3.3)     | 3.4 (-30 to 44.6)     | 23300 (21100 to 25200)    | 217 (198.3 to 235.5)     | 2.8 (-6.6 to 13.3)     |
|             | Larynx cancer | Both           | 311 (206 to 455)    | 1.6 (1 to 2.3)       | -15.7 (-38.4 to 14.6) | 9290 (8370 to 10200)      | 48.8 (43.9 to 53.9)      | -26.1 (-34.3 to -16.7) |
|             |               | Male           | 286 (188 to 423)    | 3.2 (2.1 to 4.7)     | -16.7 (-39.8 to 14.6) | 8890 (7990 to 9770)       | 101 (90.6 to 111.8)      | -26.4 (-34.6 to -16.7) |
|             |               | Female         | 25 (16 to 38)       | 0.2 (0.2 to 0.4)     | 2.1 (-18.3 to 27.7)   | 401 (339 to 544)          | 3.6 (3 to 5.1)           | -7.8 (-20.4 to 7)      |
| Puerto Rico | TBL cancer    | Both           | 206 (133 to 293)    | 3 (1.9 to 4.3)       | -7.1 (-31.5 to 22.1)  | 16300 (12700 to 20700)    | 249.7 (193.6 to 320.2)   | -9.6 (-30 to 16)       |

|             |               |        |                      |                     |                       |                           |                         |                        |
|-------------|---------------|--------|----------------------|---------------------|-----------------------|---------------------------|-------------------------|------------------------|
|             |               | Male   | 128 (79 to 184)      | 4.2 (2.6 to 6)      | -10.6 (-38 to 23.2)   | 10100 (7780 to 13000)     | 343.2 (263.8 to 446.1)  | -13.3 (-33.9 to 13.1)  |
|             |               | Female | 79 (50 to 114)       | 2 (1.3 to 2.9)      | -1.3 (-27.7 to 36.7)  | 6210 (4880 to 7870)       | 172.5 (133.8 to 220)    | -3.3 (-25.9 to 23.6)   |
|             | Larynx cancer | Both   | 62 (40 to 90)        | 1 (0.6 to 1.4)      | -1.4 (-25.5 to 29.7)  | 1340 (1010 to 1740)       | 21.3 (15.9 to 28)       | -7.8 (-31.5 to 20.8)   |
|             |               | Male   | 54 (35 to 78)        | 1.8 (1.2 to 2.7)    | -1.7 (-26.8 to 31.3)  | 1190 (893 to 1570)        | 41.8 (30.8 to 55.1)     | -8.1 (-32 to 20.8)     |
|             |               | Female | 9 (5 to 13)          | 0.3 (0.2 to 0.4)    | -1.1 (-21 to 23.8)    | 146 (107 to 216)          | 4.1 (3 to 6.1)          | -8.4 (-31.7 to 20.5)   |
| Qatar       | TBL cancer    | Both   | 30 (19 to 48)        | 4 (2.6 to 5.8)      | -14.3 (-37.8 to 19.3) | 3470 (2420 to 4830)       | 369.9 (276.6 to 486.9)  | -18.3 (-39.1 to 8.5)   |
|             |               | Male   | 25 (15 to 40)        | 4.4 (2.8 to 6.5)    | -19.6 (-45.2 to 15.6) | 2900 (1970 to 4150)       | 422.5 (312.7 to 568.2)  | -23.2 (-45.2 to 5.6)   |
|             |               | Female | 6 (4 to 8)           | 2.6 (1.7 to 3.8)    | -2.9 (-29.3 to 30.8)  | 566 (417 to 726)          | 217.9 (168.7 to 271.8)  | -8.6 (-27.1 to 13.3)   |
|             | Larynx cancer | Both   | 21 (13 to 32)        | 2.3 (1.3 to 3.4)    | 0.5 (-27.4 to 41.5)   | 393 (258 to 552)          | 47.3 (30.9 to 64.6)     | -14.8 (-38 to 18.6)    |
|             |               | Male   | 20 (12 to 29)        | 2.9 (1.6 to 4.4)    | -6.2 (-33.9 to 34.5)  | 369 (239 to 521)          | 60.6 (39.4 to 83.4)     | -20.9 (-43.1 to 10.9)  |
|             |               | Female | 2 (1 to 2)           | 0.4 (0.3 to 0.6)    | -7.2 (-26.8 to 17.7)  | 24 (17 to 33)             | 6.5 (4.9 to 8.4)        | -23.6 (-41.1 to -1.9)  |
| South Korea | TBL cancer    | Both   | 8770 (6060 to 12000) | 9.8 (6.8 to 13.3)   | -0.2 (-19.7 to 23.1)  | 439000 (399000 to 479000) | 488.6 (443.5 to 533.2)  | -13.2 (-20.1 to -5.6)  |
|             |               | Male   | 6230 (4220 to 8590)  | 15.9 (10.8 to 21.9) | -6 (-26.4 to 18.9)    | 324000 (290000 to 358000) | 796.2 (712.5 to 879.2)  | -18.2 (-25.9 to -9)    |
|             |               | Female | 2540 (1740 to 3470)  | 5.1 (3.5 to 7)      | 5.9 (-17.3 to 35)     | 116000 (102000 to 128000) | 240.1 (212.4 to 264.6)  | -7.1 (-15.3 to 1.4)    |
|             | Larynx cancer | Both   | 1490 (977 to 2100)   | 1.7 (1.1 to 2.3)    | -4.5 (-27.3 to 21.3)  | 10200 (8890 to 11900)     | 11.3 (9.9 to 13.2)      | -17.8 (-27.8 to -6)    |
|             |               | Male   | 1310 (845 to 1850)   | 3.2 (2.1 to 4.4)    | -8.8 (-31.7 to 18)    | 9230 (7980 to 11000)      | 22.7 (19.7 to 26.8)     | -21.2 (-31.3 to -9.2)  |
|             |               | Female | 180 (122 to 258)     | 0.4 (0.3 to 0.6)    | -5.6 (-19.3 to 11.4)  | 942 (797 to 1120)         | 2 (1.7 to 2.4)          | -22.5 (-33.3 to -9.1)  |
| Moldova     | TBL cancer    | Both   | 250 (170 to 348)     | 4.3 (2.9 to 5.9)    | -15.9 (-33.5 to 3.9)  | 27200 (23300 to 31400)    | 473.1 (406 to 544.7)    | -20.7 (-33.6 to -7.3)  |
|             |               | Male   | 195 (132 to 272)     | 7.9 (5.3 to 10.9)   | -18.1 (-38.3 to 4.2)  | 21900 (18500 to 25400)    | 875.2 (739.8 to 1012)   | -22.5 (-36 to -9.3)    |
|             |               | Female | 54 (35 to 79)        | 1.6 (1.1 to 2.4)    | -3.8 (-34.4 to 37)    | 5310 (4300 to 6510)       | 166.4 (134.1 to 204)    | -9.7 (-29.3 to 13.6)   |
|             | Larynx cancer | Both   | 103 (68 to 143)      | 1.8 (1.2 to 2.5)    | -13.9 (-34.7 to 11.8) | 4070 (3440 to 4760)       | 71.5 (60.4 to 83.5)     | -25.8 (-38.1 to -12.4) |
|             |               | Male   | 98 (65 to 138)       | 3.9 (2.6 to 5.5)    | -13.3 (-35.4 to 14.1) | 3940 (3320 to 4610)       | 156.6 (132.1 to 182.8)  | -25.3 (-37.8 to -12.1) |
|             |               | Female | 4 (3 to 6)           | 0.1 (0.1 to 0.2)    | -23.7 (-38.6 to -0.5) | 130 (106 to 164)          | 4.2 (3.5 to 5.3)        | -35.6 (-48 to -15)     |
| Romania     | TBL cancer    | Both   | 2670 (1820 to 3670)  | 7.8 (5.3 to 10.8)   | 0.4 (-21.5 to 26.5)   | 271000 (222000 to 330000) | 819.1 (668.5 to 1000.6) | -4.2 (-21.7 to 16.6)   |

|                       |               |        |                       |                    |                      |                              |                           |                        |
|-----------------------|---------------|--------|-----------------------|--------------------|----------------------|------------------------------|---------------------------|------------------------|
|                       | Larynx cancer | Male   | 2040 (1380 to 2820)   | 13.2 (8.8 to 18.2) | -4 (-26.7 to 23)     | 211000 (172000 to 259000)    | 1382.5 (1127.1 to 1695.8) | -8.5 (-25.2 to 11.9)   |
|                       |               | Female | 626 (408 to 914)      | 3.3 (2.2 to 4.9)   | 16.9 (-15.6 to 60.7) | 59100 (48000 to 71400)       | 333.8 (269 to 406.2)      | 12.8 (-8.7 to 37.6)    |
|                       |               | Both   | 1020 (672 to 1440)    | 3.2 (2.1 to 4.6)   | 3.7 (-25 to 36.7)    | 27600 (21900 to 33500)       | 86.6 (68 to 105.8)        | -9.9 (-29.1 to 11.3)   |
|                       |               | Male   | 958 (624 to 1350)     | 6.4 (4.2 to 9.1)   | 2.4 (-26.4 to 35.9)  | 26100 (20700 to 31900)       | 173.9 (136.2 to 213)      | -10.9 (-30 to 10.1)    |
|                       |               | Female | 62 (41 to 87)         | 0.4 (0.2 to 0.5)   | 5.3 (-15 to 31.6)    | 1450 (1130 to 1810)          | 8.6 (6.6 to 10.9)         | -6.8 (-27.7 to 18.1)   |
| Russia                | TBL cancer    | Both   | 13700 (9520 to 18100) | 5.8 (4 to 7.7)     | -12 (-25.1 to 2.3)   | 1330000 (1130000 to 1570000) | 572.9 (484 to 673.5)      | -17.2 (-30.1 to -2.7)  |
|                       |               | Male   | 10700 (7200 to 14500) | 11.5 (7.8 to 15.5) | -18.2 (-32.9 to -2)  | 1080000 (881000 to 1300000)  | 1138.9 (933.8 to 1367.7)  | -22.2 (-36.1 to -6.4)  |
|                       |               | Female | 2980 (2010 to 4040)   | 2.1 (1.4 to 2.9)   | 8 (-14 to 34.9)      | 255000 (207000 to 308000)    | 187.9 (151.5 to 230)      | 0.8 (-19.8 to 24.5)    |
|                       | Larynx cancer | Both   | 3740 (2540 to 5190)   | 1.6 (1.1 to 2.3)   | -9.4 (-24.2 to 9)    | 110000 (90400 to 132000)     | 48.5 (39.8 to 58.1)       | -25 (-38.7 to -10.2)   |
|                       |               | Male   | 3440 (2330 to 4790)   | 3.6 (2.5 to 5)     | -12.6 (-27.9 to 6)   | 104000 (84500 to 126000)     | 108.8 (88.8 to 132.2)     | -27.3 (-40.9 to -11.8) |
|                       |               | Female | 297 (201 to 433)      | 0.2 (0.2 to 0.4)   | 4.5 (-11.7 to 24.4)  | 6500 (5240 to 8040)          | 5.1 (4.1 to 6.4)          | -12.3 (-29.4 to 10.3)  |
| Rwanda                | TBL cancer    | Both   | 111 (64 to 183)       | 1.9 (1.1 to 3.1)   | 10.9 (-17.7 to 42)   | 12600 (8630 to 18500)        | 197.6 (135.8 to 286.7)    | 9 (-11 to 32.7)        |
|                       |               | Male   | 72 (36 to 132)        | 3 (1.5 to 5.4)     | 6.3 (-26.6 to 45.9)  | 8290 (5020 to 13100)         | 314.5 (192.2 to 487.9)    | 3.9 (-16.8 to 25.9)    |
|                       |               | Female | 39 (25 to 58)         | 1.1 (0.7 to 1.7)   | 18.5 (-14 to 61.5)   | 4330 (3180 to 5640)          | 115.9 (86.1 to 149.5)     | 17.7 (-5.9 to 45.6)    |
|                       | Larynx cancer | Both   | 46 (30 to 68)         | 0.7 (0.5 to 1)     | -0.4 (-19 to 22.5)   | 2340 (1750 to 3170)          | 33.9 (25.9 to 45.4)       | -5.3 (-23.7 to 18.2)   |
|                       |               | Male   | 35 (23 to 54)         | 1.3 (0.8 to 1.9)   | -1 (-21.3 to 25.2)   | 1830 (1320 to 2610)          | 61.7 (45.7 to 87.6)       | -5.8 (-25.1 to 18.7)   |
|                       |               | Female | 11 (7 to 16)          | 0.3 (0.2 to 0.4)   | -2.6 (-23 to 22.8)   | 516 (380 to 689)             | 13.2 (9.9 to 17.3)        | -7.9 (-29.2 to 20.1)   |
| Saint Kitts and Nevis | TBL cancer    | Both   | 2 (1 to 3)            | 2.7 (1.8 to 3.7)   | 16 (-9.4 to 44.8)    | 182 (146 to 221)             | 253.7 (208 to 305.7)      | 14.5 (-4.4 to 35.5)    |
|                       |               | Male   | 1 (1 to 2)            | 3.6 (2.4 to 5.1)   | 18.1 (-10.9 to 55.3) | 121 (97 to 146)              | 343.9 (280.2 to 408.6)    | 18.3 (-2.8 to 41.6)    |
|                       |               | Female | 1 (0 to 1)            | 1.8 (1.1 to 2.6)   | 5.9 (-25.3 to 54.1)  | 60 (47 to 75)                | 167.9 (131.3 to 207.9)    | 3.2 (-16.5 to 27.1)    |
|                       | Larynx cancer | Both   | 1 (1 to 1)            | 1.2 (0.8 to 1.8)   | 30.4 (1.7 to 65.3)   | 30 (24 to 36)                | 40.7 (33.1 to 48.5)       | 24.8 (4.2 to 48.3)     |
|                       |               | Male   | 1 (1 to 1)            | 2.5 (1.6 to 3.5)   | 27.3 (-0.9 to 61.5)  | 30 (24 to 36)                | 81.6 (66.9 to 97.1)       | 21.7 (2.2 to 44.1)     |
|                       |               | Female | 0 (0 to 0)            | 0.1 (0 to 0.1)     | -2.7 (-18.4 to 15.5) | 1 (0 to 1)                   | 1.5 (1.2 to 2)            | -8.8 (-27.2 to 12)     |

|                                  |               |        |            |                    |                      |                  |                         |                      |
|----------------------------------|---------------|--------|------------|--------------------|----------------------|------------------|-------------------------|----------------------|
| Saint Lucia                      | TBL cancer    | Both   | 6 (4 to 9) | 2.8 (1.9 to 4)     | 15.4 (-8.9 to 48.1)  | 630 (528 to 749) | 286.9 (241.2 to 340.1)  | 13.4 (-5.7 to 34.7)  |
|                                  |               | Male   | 4 (3 to 6) | 4.1 (2.7 to 5.8)   | 11 (-17.2 to 49.7)   | 429 (355 to 514) | 406.9 (339.7 to 486.6)  | 9.9 (-9.2 to 33.2)   |
|                                  |               | Female | 2 (1 to 3) | 1.8 (1.1 to 2.5)   | 23.2 (-7.9 to 62.1)  | 201 (166 to 242) | 177 (146.4 to 213.7)    | 19.8 (-2.6 to 46.2)  |
|                                  | Larynx cancer | Both   | 3 (2 to 4) | 1.4 (1 to 1.9)     | 12.2 (-10.8 to 41.5) | 113 (94 to 136)  | 51 (42.3 to 60.9)       | 9 (-10.3 to 30.7)    |
|                                  |               | Male   | 3 (2 to 4) | 2.6 (1.8 to 3.6)   | 10.6 (-13.7 to 40.4) | 105 (86 to 126)  | 98 (81.2 to 117.3)      | 7.6 (-12.2 to 29.2)  |
|                                  |               | Female | 0 (0 to 0) | 0.3 (0.2 to 0.4)   | 17.2 (-0.9 to 37.7)  | 8 (7 to 10)      | 7.3 (5.9 to 8.8)        | 14.9 (-7.1 to 40.3)  |
| Saint Vincent and the Grenadines | TBL cancer    | Both   | 3 (2 to 4) | 2.4 (1.7 to 3.3)   | 10.8 (-14.2 to 39.8) | 338 (292 to 392) | 244.9 (212.1 to 284.4)  | 10.5 (-5.9 to 29.9)  |
|                                  |               | Male   | 2 (1 to 3) | 3 (2 to 4.2)       | 7.5 (-22.2 to 46.9)  | 220 (188 to 258) | 307.5 (264 to 360.6)    | 7.7 (-8.8 to 28.8)   |
|                                  |               | Female | 1 (1 to 2) | 1.7 (1.2 to 2.4)   | 12.7 (-18 to 54.7)   | 118 (99 to 139)  | 178.1 (148.8 to 209.6)  | 12.7 (-8.1 to 36.5)  |
|                                  | Larynx cancer | Both   | 2 (2 to 3) | 1.6 (1.1 to 2.2)   | 16.3 (-6.6 to 44.5)  | 97 (83 to 114)   | 69.6 (59.9 to 81.3)     | 15.2 (-3.8 to 37.5)  |
|                                  |               | Male   | 2 (1 to 3) | 3 (2.1 to 4.1)     | 13.1 (-10.4 to 41.4) | 93 (80 to 109)   | 128.5 (110.8 to 150.4)  | 12.5 (-6.1 to 34.7)  |
|                                  |               | Female | 0 (0 to 0) | 0.2 (0.1 to 0.3)   | 8 (-6.8 to 25.4)     | 4 (4 to 5)       | 6.6 (5.5 to 7.9)        | 7.7 (-9.3 to 28.5)   |
| Samoa                            | TBL cancer    | Both   | 4 (2 to 5) | 2.6 (1.7 to 3.7)   | 1.7 (-21 to 31.3)    | 423 (325 to 552) | 277.4 (214.3 to 354.9)  | 0.9 (-14.6 to 20.2)  |
|                                  |               | Male   | 3 (2 to 4) | 3.5 (2.2 to 5.3)   | -2.2 (-28 to 29.5)   | 286 (204 to 385) | 376.1 (271.5 to 494.9)  | -2.9 (-18.2 to 15)   |
|                                  |               | Female | 1 (1 to 2) | 1.7 (1 to 2.5)     | 8.1 (-23.3 to 53.4)  | 137 (100 to 182) | 180.7 (135.1 to 238.3)  | 7.3 (-14.8 to 36.3)  |
|                                  | Larynx cancer | Both   | 1 (0 to 1) | 0.5 (0.3 to 0.7)   | -1.6 (-18.3 to 18.4) | 25 (21 to 31)    | 17.1 (14 to 20.8)       | -5.6 (-20.9 to 13.9) |
|                                  |               | Male   | 1 (0 to 1) | 0.7 (0.5 to 1.1)   | -2.6 (-21.9 to 21.3) | 18 (14 to 22)    | 25.1 (20.3 to 30.9)     | -6.6 (-22.1 to 13.8) |
|                                  |               | Female | 0 (0 to 0) | 0.3 (0.2 to 0.4)   | -1.5 (-23.9 to 27.1) | 8 (6 to 10)      | 9.8 (7.2 to 13.2)       | -5.4 (-28.9 to 26.2) |
| San Marino                       | TBL cancer    | Both   | 5 (4 to 8) | 9.2 (5.9 to 13.5)  | 0.1 (-21.2 to 28.6)  | 412 (264 to 607) | 721.9 (456.3 to 1079.2) | -2.8 (-30.2 to 34.5) |
|                                  |               | Male   | 4 (3 to 6) | 13.4 (8.6 to 19.5) | -2.3 (-24.7 to 26.9) | 290 (184 to 418) | 1043.4 (655.9 to 1521)  | -4.4 (-31.6 to 30.7) |
|                                  |               | Female | 2 (1 to 2) | 5.2 (3.2 to 8.2)   | 4 (-26.7 to 47.6)    | 121 (77 to 191)  | 421.4 (263.1 to 665.3)  | 0.1 (-31.5 to 45.2)  |
|                                  | Larynx cancer | Both   | 1 (1 to 2) | 2.4 (1.5 to 3.7)   | 5.1 (-23.5 to 40.3)  | 18 (11 to 26)    | 31.8 (19.5 to 47.6)     | 0.4 (-31.3 to 40.3)  |
|                                  |               | Male   | 1 (1 to 2) | 4.9 (3.1 to 7.3)   | 6.1 (-23 to 42.1)    | 17 (11 to 25)    | 63.5 (39 to 95.2)       | 1.7 (-29.9 to 42.2)  |
|                                  |               | Female | 0 (0 to 0) | 0.1 (0.1 to 0.2)   | 0.5 (-22.1 to 29.1)  | 1 (0 to 1)       | 2.1 (1.3 to 3.4)        | -4.5 (-37.9 to 42)   |
| Sao Tome and Principe            | TBL cancer    | Both   | 4 (3 to 6) | 4.2 (2.7 to 6)     | 11.6 (-13.4 to 41.6) | 499 (381 to 637) | 448 (347.2 to 563.6)    | 10.5 (-8.2 to 29.7)  |
|                                  |               | Male   | 3 (2 to 4) | 6.1 (4 to 8.6)     | 8.3 (-18.7 to 46.8)  | 337 (266 to 427) | 646.7 (520.9 to 798.2)  | 7.1 (-11.7 to 29)    |
|                                  |               | Female | 1 (1 to 2) | 2.5 (1.2 to 4)     | 18.8 (-16.7 to 63.7) | 162 (93 to 236)  | 266 (151.3 to 382.6)    | 17.4 (-7.7 to 43)    |
|                                  | Larynx cancer | Both   | 1 (0 to 1) | 0.6 (0.4 to 0.8)   | 9.6 (-13.6 to 36.2)  | 28 (22 to 35)    | 25.5 (20.1 to 32)       | 5.5 (-15.4 to 30.1)  |
|                                  |               | Male   | 1 (0 to 1) | 1.1 (0.8 to 1.6)   | 9.7 (-14.6 to 38)    | 25 (20 to 32)    | 49.1 (38.7 to 61.2)     | 5.6 (-15.9 to 30.6)  |
|                                  |               | Female | 0 (0 to 0) | 0.1 (0.1 to 0.1)   | 1.4 (-19.4 to 27.2)  | 2 (2 to 3)       | 3.9 (2.9 to 5.2)        | -4.6 (-25 to 21.1)   |

|              |               |        |                     |                     |                      |                           |                         |                       |
|--------------|---------------|--------|---------------------|---------------------|----------------------|---------------------------|-------------------------|-----------------------|
| Saudi Arabia | TBL cancer    | Both   | 382 (252 to 554)    | 2 (1.3 to 2.9)      | -3.5 (-27 to 27.2)   | 45100 (34200 to 56600)    | 206 (161.1 to 250.4)    | -5.3 (-23.9 to 15.3)  |
|              |               | Male   | 269 (170 to 397)    | 2.5 (1.5 to 3.7)    | -9.7 (-36.2 to 25.6) | 32600 (24300 to 41500)    | 258 (197.9 to 321.4)    | -9.9 (-28.9 to 12)    |
|              |               | Female | 113 (73 to 162)     | 1.3 (0.9 to 1.9)    | 8.7 (-19.8 to 43.9)  | 12500 (9260 to 16300)     | 125.9 (94.8 to 161.2)   | 3.2 (-20.3 to 31.1)   |
|              | Larynx cancer | Both   | 138 (91 to 202)     | 0.6 (0.4 to 0.9)    | 2.2 (-18.6 to 27.1)  | 3630 (2690 to 4910)       | 15.4 (12 to 20.3)       | -19.2 (-35.8 to -0.1) |
|              |               | Male   | 117 (77 to 175)     | 0.9 (0.6 to 1.3)    | 1.1 (-20.8 to 28.5)  | 3130 (2290 to 4280)       | 22.4 (17.6 to 29.7)     | -19.5 (-36.4 to 0.3)  |
|              |               | Female | 21 (13 to 31)       | 0.2 (0.1 to 0.3)    | -6.6 (-28 to 19.8)   | 498 (351 to 686)          | 4.5 (3.3 to 6.1)        | -28 (-45.5 to -4.4)   |
| Senegal      | TBL cancer    | Both   | 200 (125 to 294)    | 2.7 (1.7 to 4)      | 9.2 (-19.6 to 46)    | 22300 (16400 to 29500)    | 288.3 (215.8 to 378.8)  | 9.4 (-13.4 to 35)     |
|              |               | Male   | 148 (91 to 230)     | 4.2 (2.6 to 6.5)    | 6.5 (-24.3 to 46.7)  | 16600 (12000 to 22800)    | 448.2 (328.8 to 610.6)  | 6.5 (-16.1 to 34.9)   |
|              |               | Female | 52 (32 to 79)       | 1.3 (0.8 to 2)      | 20.4 (-17.7 to 73.2) | 5730 (4240 to 7740)       | 139.3 (104.9 to 185.7)  | 22 (-3.3 to 53.8)     |
|              | Larynx cancer | Both   | 45 (29 to 65)       | 0.6 (0.4 to 0.9)    | 5.1 (-18.4 to 37.7)  | 2190 (1620 to 2880)       | 27.9 (21.1 to 36.5)     | 2.2 (-22.5 to 32.2)   |
|              |               | Male   | 40 (26 to 59)       | 1.1 (0.7 to 1.6)    | 6.2 (-18.8 to 41)    | 1960 (1420 to 2600)       | 52 (38.5 to 68.4)       | 3.3 (-21.8 to 34.8)   |
|              |               | Female | 5 (3 to 7)          | 0.1 (0.1 to 0.2)    | 5.2 (-21.1 to 37.3)  | 228 (165 to 301)          | 5.5 (4 to 7.2)          | 1.9 (-25 to 33.6)     |
| Serbia       | TBL cancer    | Both   | 1770 (1170 to 2490) | 11.5 (7.6 to 16.3)  | -3.8 (-26.8 to 25.5) | 175000 (136000 to 221000) | 1172 (910.3 to 1482.4)  | -6.3 (-27.1 to 18.9)  |
|              |               | Male   | 1250 (809 to 1780)  | 17.3 (11.2 to 24.7) | -8.1 (-31.2 to 22.3) | 127000 (98600 to 161000)  | 1782 (1380.8 to 2275.3) | -10.1 (-30.1 to 14.4) |
|              |               | Female | 518 (332 to 745)    | 6.5 (4.2 to 9.5)    | 6.7 (-22.8 to 46.6)  | 48200 (37300 to 61700)    | 627.9 (483.4 to 810.5)  | 3.7 (-19.9 to 34)     |
|              | Larynx cancer | Both   | 544 (351 to 785)    | 3.7 (2.4 to 5.4)    | -3.4 (-28.8 to 30.2) | 11100 (8490 to 14300)     | 75.4 (57.3 to 96.9)     | -15.4 (-34.7 to 9.2)  |
|              |               | Male   | 471 (303 to 681)    | 6.7 (4.3 to 9.7)    | -4.5 (-30.8 to 29.5) | 10100 (7660 to 13000)     | 144.8 (109.3 to 186.8)  | -16.1 (-35.7 to 8.7)  |
|              |               | Female | 73 (47 to 105)      | 0.9 (0.6 to 1.3)    | -0.4 (-25.1 to 32.4) | 997 (745 to 1290)         | 12.8 (9.6 to 16.5)      | -14.7 (-37 to 12.6)   |
| Seychelles   | TBL cancer    | Both   | 4 (3 to 6)          | 3.9 (2.7 to 5.2)    | 4.1 (-15.3 to 29.1)  | 472 (410 to 549)          | 413 (360.2 to 479.5)    | 3.2 (-9.9 to 20.2)    |
|              |               | Male   | 3 (2 to 4)          | 6.2 (4.1 to 8.4)    | -1.7 (-23.9 to 26.9) | 364 (308 to 439)          | 655.2 (556.3 to 783.6)  | -1.9 (-17.1 to 18.1)  |
|              |               | Female | 1 (1 to 2)          | 1.9 (1.2 to 2.7)    | 9.7 (-20.5 to 47.5)  | 108 (88 to 130)           | 187.5 (154.1 to 226.3)  | 8.4 (-12.4 to 31.1)   |
|              | Larynx cancer | Both   | 4 (3 to 6)          | 3.8 (2.6 to 5.2)    | 10.2 (-10.8 to 36.9) | 146 (122 to 175)          | 123.7 (103 to 147.8)    | 0.6 (-17.7 to 21.6)   |
|              |               | Male   | 4 (3 to 6)          | 7.3 (5 to 10)       | 5.8 (-15.7 to 33)    | 137 (112 to 167)          | 237.8 (196.8 to 287)    | -3.2 (-20.7 to 17.6)  |
|              |               | Female | 0 (0 to 0)          | 0.5 (0.4 to 0.7)    | 8.7 (-12.6 to 32.9)  | 9 (7 to 11)               | 15.3 (12.2 to 18.7)     | 1.7 (-18.4 to 27.3)   |
| Sierra Leone | TBL cancer    | Both   | 83 (50 to 125)      | 2.4 (1.4 to 3.5)    | 6.9 (-20.7 to 45.9)  | 9420 (6630 to 12800)      | 251.5 (178.4 to 339.1)  | 6.6 (-14.7 to 35.4)   |

|                 |               |        |                   |                    |                       |                        |                          |                        |
|-----------------|---------------|--------|-------------------|--------------------|-----------------------|------------------------|--------------------------|------------------------|
|                 |               | Male   | 61 (35 to 96)     | 3.5 (2 to 5.5)     | 1.6 (-28.8 to 44.4)   | 6980 (4680 to 9680)    | 376.8 (256.1 to 517.8)   | 1.3 (-19.8 to 30.3)    |
|                 |               | Female | 22 (14 to 32)     | 1.2 (0.8 to 1.8)   | 19.6 (-15.5 to 65.2)  | 2450 (1790 to 3220)    | 125 (92.7 to 165.1)      | 18.6 (-5.6 to 49.1)    |
|                 | Larynx cancer | Both   | 23 (15 to 35)     | 0.6 (0.4 to 1)     | 0.3 (-21.1 to 29.4)   | 1170 (856 to 1600)     | 31.1 (23 to 42.1)        | -4.2 (-24.8 to 22)     |
|                 |               | Male   | 21 (13 to 31)     | 1.1 (0.7 to 1.7)   | -1.2 (-23 to 29.8)    | 1040 (747 to 1430)     | 54.8 (39.8 to 74.9)      | -5.7 (-26.7 to 21.3)   |
|                 |               | Female | 3 (2 to 4)        | 0.1 (0.1 to 0.2)   | -4.4 (-25.4 to 22.5)  | 130 (92 to 181)        | 6.7 (4.8 to 9.3)         | -8.9 (-30.1 to 19.7)   |
| Singapore       | TBL cancer    | Both   | 610 (414 to 850)  | 7.9 (5.4 to 11)    | -11.4 (-31 to 13.6)   | 31400 (29000 to 33500) | 398.4 (366.2 to 425.6)   | -20.2 (-25.2 to -15.1) |
|                 |               | Male   | 383 (249 to 539)  | 10.5 (7.1 to 14.8) | -17.4 (-37.7 to 7.3)  | 20500 (18700 to 22000) | 538.8 (490.2 to 578.2)   | -25.2 (-31.7 to -19.6) |
|                 |               | Female | 227 (153 to 322)  | 5.7 (3.9 to 8.1)   | -3.6 (-28.4 to 29.9)  | 10900 (9560 to 12100)  | 271.4 (238.4 to 300.8)   | -13.3 (-21.7 to -4)    |
|                 | Larynx cancer | Both   | 102 (67 to 148)   | 1.3 (0.9 to 1.9)   | -19.6 (-39 to 5.1)    | 696 (616 to 790)       | 8.8 (7.8 to 10)          | -30.4 (-38.2 to -20.4) |
|                 |               | Male   | 88 (58 to 129)    | 2.3 (1.5 to 3.3)   | -24.1 (-43.7 to 1.5)  | 618 (539 to 709)       | 16.3 (14.3 to 18.6)      | -34.1 (-42 to -23.5)   |
|                 |               | Female | 13 (9 to 19)      | 0.3 (0.2 to 0.5)   | -2.6 (-21.2 to 18.8)  | 78 (66 to 95)          | 2 (1.7 to 2.4)           | -15.5 (-26.7 to -2.3)  |
| Slovakia        | TBL cancer    | Both   | 788 (509 to 1130) | 8.5 (5.5 to 12.2)  | -2.8 (-27.3 to 30.8)  | 58600 (45100 to 76300) | 641.4 (491.6 to 833.8)   | -9.9 (-30.7 to 17.1)   |
|                 |               | Male   | 591 (376 to 865)  | 14.7 (9.3 to 21.1) | -6.3 (-31.7 to 26)    | 45000 (34200 to 59100) | 1096.1 (834.6 to 1426.6) | -13.5 (-34.1 to 13.5)  |
|                 |               | Female | 197 (126 to 290)  | 3.9 (2.5 to 5.6)   | 0.3 (-30.8 to 40.5)   | 13600 (10500 to 17200) | 278 (213.3 to 353)       | -5.4 (-27.8 to 21.6)   |
|                 | Larynx cancer | Both   | 171 (111 to 249)  | 1.9 (1.3 to 2.8)   | -6.4 (-33 to 30.2)    | 4670 (3490 to 6160)    | 53.2 (39.5 to 70.2)      | -17.3 (-38.3 to 10.5)  |
|                 |               | Male   | 158 (102 to 232)  | 3.9 (2.5 to 5.7)   | -9.4 (-35.7 to 26.7)  | 4430 (3290 to 5870)    | 108.5 (80.4 to 142.7)    | -19.6 (-40 to 7.4)     |
|                 |               | Female | 13 (8 to 19)      | 0.3 (0.2 to 0.4)   | -0.3 (-24 to 30.7)    | 237 (173 to 314)       | 5.2 (3.7 to 6.9)         | -12.7 (-36.2 to 16.6)  |
| Slovenia        | TBL cancer    | Both   | 332 (217 to 468)  | 8.3 (5.4 to 11.7)  | -9.8 (-33.7 to 19)    | 27300 (20900 to 35600) | 697.1 (531.5 to 906.7)   | -12.3 (-32.7 to 14.7)  |
|                 |               | Male   | 229 (147 to 324)  | 12.2 (7.9 to 17.3) | -15.2 (-39.1 to 11.7) | 19400 (14800 to 25600) | 1041.9 (793.7 to 1377.1) | -17.5 (-36.7 to 6.5)   |
|                 |               | Female | 104 (66 to 150)   | 4.9 (3.1 to 7.2)   | -2 (-30.4 to 37.3)    | 7900 (5940 to 10300)   | 392 (292.2 to 514.7)     | -3.8 (-28.1 to 28.4)   |
|                 | Larynx cancer | Both   | 74 (47 to 108)    | 2 (1.2 to 2.9)     | -4.4 (-30.3 to 31.7)  | 1230 (929 to 1640)     | 32.6 (24.8 to 43.5)      | -18.7 (-38.7 to 9.2)   |
|                 |               | Male   | 65 (42 to 97)     | 3.6 (2.3 to 5.3)   | -7.7 (-34.2 to 28.1)  | 1110 (832 to 1480)     | 61.4 (46.5 to 81.8)      | -21.3 (-40.1 to 6.5)   |
|                 |               | Female | 8 (5 to 13)       | 0.4 (0.3 to 0.7)   | 1.3 (-26.6 to 38)     | 123 (86 to 167)        | 6.2 (4.4 to 8.6)         | -12 (-35.9 to 19.8)    |
| Solomon Islands | TBL cancer    | Both   | 24 (11 to 41)     | 7.2 (3.6 to 12.3)  | 6.6 (-16.2 to 38.6)   | 3060 (1540 to 5110)    | 852 (456.7 to 1377.7)    | 6.3 (-11.9 to 31.2)    |

|              |               |        |                      |                    |                       |                           |                          |                        |
|--------------|---------------|--------|----------------------|--------------------|-----------------------|---------------------------|--------------------------|------------------------|
|              |               | Male   | 19 (8 to 37)         | 11.5 (5.3 to 21.4) | 5.6 (-18.1 to 40)     | 2490 (1170 to 4390)       | 1363.3 (678.6 to 2360.3) | 5 (-13 to 30.2)        |
|              |               | Female | 4 (2 to 7)           | 2.8 (1.6 to 4.4)   | 21.9 (-12.5 to 69.4)  | 569 (355 to 864)          | 321.7 (209.8 to 477.5)   | 22.3 (-1.9 to 51.4)    |
|              | Larynx cancer | Both   | 3 (2 to 4)           | 0.8 (0.5 to 1.1)   | 3.7 (-16 to 27.1)     | 124 (76 to 167)           | 34.8 (22.7 to 45.6)      | -2.5 (-20.6 to 19.6)   |
|              |               | Male   | 2 (1 to 3)           | 1.2 (0.7 to 1.7)   | 4.8 (-17.4 to 32)     | 92 (48 to 127)            | 51.5 (29.7 to 68.1)      | -2 (-21.4 to 22.7)     |
|              |               | Female | 1 (0 to 1)           | 0.4 (0.2 to 0.6)   | 7 (-17.7 to 40)       | 32 (20 to 45)             | 17.5 (11.4 to 23.3)      | 1.7 (-22.4 to 36.1)    |
| Somalia      | TBL cancer    | Both   | 88 (42 to 160)       | 1.3 (0.6 to 2.4)   | -3.7 (-29.2 to 30.3)  | 10800 (6060 to 18100)     | 144.9 (82.1 to 238)      | -5.3 (-24.6 to 17.3)   |
|              |               | Male   | 69 (32 to 132)       | 2.5 (1.2 to 4.7)   | -4.7 (-32.4 to 37.4)  | 8550 (4690 to 15000)      | 274.2 (151.4 to 470.8)   | -6.5 (-24.7 to 15.6)   |
|              |               | Female | 19 (9 to 34)         | 0.5 (0.2 to 0.9)   | 2 (-22 to 29.2)       | 2210 (1210 to 3890)       | 51.8 (28.3 to 89.6)      | 1.3 (-22.7 to 28.1)    |
|              | Larynx cancer | Both   | 51 (30 to 78)        | 0.7 (0.4 to 1)     | -7 (-25 to 16.4)      | 3090 (2120 to 4380)       | 37.8 (26.4 to 53)        | -8.4 (-26.5 to 16.2)   |
|              |               | Male   | 37 (22 to 58)        | 1.1 (0.7 to 1.7)   | -7.8 (-27.5 to 19.4)  | 2320 (1490 to 3290)       | 64.9 (42.5 to 90.8)      | -9.3 (-28.1 to 16.1)   |
|              |               | Female | 13 (8 to 21)         | 0.3 (0.2 to 0.5)   | -3.9 (-25.5 to 24.6)  | 769 (496 to 1150)         | 16.8 (11 to 25.2)        | -5.9 (-28.2 to 25.1)   |
| South Africa | TBL cancer    | Both   | 1920 (1340 to 2570)  | 4.2 (3 to 5.6)     | -12.4 (-23.4 to 2.2)  | 220000 (196000 to 254000) | 467.3 (417.7 to 537.5)   | -16 (-25.6 to -3.1)    |
|              |               | Male   | 1320 (917 to 1790)   | 6.8 (4.8 to 9.2)   | -15.5 (-28.1 to 0.7)  | 155000 (136000 to 183000) | 760.9 (665.9 to 893.5)   | -18.8 (-29.2 to -3.3)  |
|              |               | Female | 604 (422 to 807)     | 2.4 (1.6 to 3.1)   | -7.1 (-21 to 10.6)    | 64200 (55800 to 74000)    | 245 (213.4 to 281.7)     | -10.6 (-22.4 to 3.9)   |
|              | Larynx cancer | Both   | 390 (280 to 520)     | 0.8 (0.6 to 1.1)   | -19.5 (-27.3 to -9.9) | 16700 (15000 to 18500)    | 34.6 (31.2 to 38.4)      | -29.5 (-35.8 to -20.9) |
|              |               | Male   | 326 (233 to 434)     | 1.6 (1.2 to 2.2)   | -20.1 (-28.5 to -8.9) | 14300 (12800 to 16100)    | 68.8 (61.8 to 77.6)      | -29.9 (-36.8 to -20.4) |
|              |               | Female | 65 (45 to 87)        | 0.2 (0.2 to 0.3)   | -18.4 (-27.3 to -8.3) | 2380 (2110 to 2730)       | 8.8 (7.8 to 10.1)        | -29.4 (-38.8 to -19)   |
| South Sudan  | TBL cancer    | Both   | 73 (41 to 115)       | 2 (1.1 to 3)       | -4.7 (-29.3 to 26.4)  | 8570 (5450 to 12600)      | 213 (137.3 to 305.7)     | -4.8 (-23.3 to 18)     |
|              |               | Male   | 56 (29 to 89)        | 2.9 (1.5 to 4.6)   | -4.3 (-33.3 to 32.4)  | 6510 (3820 to 9570)       | 312.7 (188.1 to 453.9)   | -4.9 (-23.8 to 17.5)   |
|              |               | Female | 17 (10 to 33)        | 0.9 (0.5 to 1.7)   | 4.9 (-20.6 to 42.2)   | 2060 (1260 to 3760)       | 99 (62.9 to 181.1)       | 8 (-15.2 to 41.5)      |
|              | Larynx cancer | Both   | 19 (12 to 30)        | 0.5 (0.3 to 0.7)   | -8.2 (-26.2 to 14.7)  | 1080 (711 to 1600)        | 24.2 (16.4 to 35.4)      | -10.2 (-29 to 14.9)    |
|              |               | Male   | 15 (9 to 25)         | 0.7 (0.4 to 1.1)   | -6.4 (-25.9 to 20.5)  | 847 (544 to 1330)         | 36.7 (24 to 57.3)        | -8.2 (-28.2 to 18.8)   |
|              |               | Female | 4 (3 to 6)           | 0.2 (0.1 to 0.3)   | -4.9 (-24.9 to 22)    | 229 (147 to 336)          | 10.2 (6.9 to 14.7)       | -6.3 (-28.6 to 25.6)   |
| Spain        | TBL cancer    | Both   | 7500 (4930 to 10700) | 8.7 (5.6 to 12.5)  | -6.8 (-31.4 to 24)    | 517000 (485000 to 545000) | 624.8 (587.7 to 659.2)   | -10.1 (-15.2 to -5.1)  |



|           |               |        |                     |                    |                       |                           |                          |                       |
|-----------|---------------|--------|---------------------|--------------------|-----------------------|---------------------------|--------------------------|-----------------------|
|           |               | Male   | 5980 (3920 to 8600) | 14.8 (9.7 to 21.3) | -11.1 (-34.7 to 18.7) | 405000 (377000 to 430000) | 1030.4 (959.8 to 1095.2) | -14.7 (-20.3 to -9.3) |
|           |               | Female | 1510 (965 to 2250)  | 3.4 (2.2 to 5.1)   | 11.2 (-23.5 to 60.4)  | 112000 (100000 to 124000) | 269.8 (242.7 to 297.5)   | 8.9 (-1.6 to 20.7)    |
|           | Larynx cancer | Both   | 2260 (1470 to 3330) | 2.8 (1.8 to 4.1)   | -16.6 (-38.5 to 12.4) | 32100 (29200 to 35600)    | 39 (35.4 to 43.1)        | -22 (-30 to -12.9)    |
|           |               | Male   | 2130 (1380 to 3150) | 5.5 (3.6 to 8.2)   | -17.7 (-39.6 to 11.6) | 30200 (27300 to 33500)    | 77.4 (69.8 to 86.1)      | -23 (-31.3 to -13.6)  |
|           |               | Female | 132 (83 to 202)     | 0.3 (0.2 to 0.5)   | -0.2 (-22.3 to 29)    | 1930 (1440 to 2250)       | 4.6 (3.5 to 5.4)         | -7.1 (-19.9 to 7.7)   |
| Sri Lanka | TBL cancer    | Both   | 594 (358 to 902)    | 2.3 (1.4 to 3.5)   | -3 (-31.2 to 37.4)    | 60500 (43600 to 82900)    | 229.1 (165.9 to 312.2)   | -6.1 (-31.9 to 26.9)  |
|           |               | Male   | 407 (239 to 632)    | 3.5 (2 to 5.3)     | -7.9 (-39.7 to 38.4)  | 42500 (29400 to 60000)    | 352.5 (246 to 494.2)     | -10.4 (-37.1 to 25.3) |
|           |               | Female | 188 (115 to 280)    | 1.3 (0.8 to 2)     | 11.7 (-22.9 to 57.4)  | 18100 (13100 to 24000)    | 127.3 (92.9 to 168.5)    | 7.9 (-21.2 to 42.6)   |
|           | Larynx cancer | Both   | 180 (111 to 267)    | 0.7 (0.4 to 1)     | -4.3 (-31.2 to 28.6)  | 4350 (3070 to 5930)       | 16.4 (11.7 to 22.3)      | -21.6 (-43.3 to 5.2)  |
|           |               | Male   | 147 (87 to 222)     | 1.2 (0.7 to 1.8)   | -5.3 (-32.7 to 29.5)  | 3510 (2430 to 4890)       | 29.2 (20.4 to 40.4)      | -23 (-45.2 to 3.7)    |
|           |               | Female | 33 (21 to 49)       | 0.2 (0.1 to 0.3)   | 5.3 (-25.5 to 40.4)   | 838 (598 to 1140)         | 5.9 (4.2 to 8)           | -11.1 (-37 to 19.3)   |
| Sudan     | TBL cancer    | Both   | 364 (211 to 611)    | 1.9 (1.1 to 3.3)   | 2.7 (-25.1 to 42)     | 41100 (26600 to 63700)    | 201.9 (130.7 to 314.8)   | 1.9 (-18.5 to 29.4)   |
|           |               | Male   | 263 (139 to 488)    | 2.6 (1.4 to 4.9)   | -2.4 (-33.2 to 46.1)  | 29600 (17700 to 50800)    | 276.8 (167.3 to 474.9)   | -3.3 (-23.7 to 26.8)  |
|           |               | Female | 101 (60 to 153)     | 1.1 (0.7 to 1.6)   | 21.2 (-11.6 to 60.9)  | 11500 (7710 to 16600)     | 111.6 (78.2 to 154)      | 22.3 (-7.5 to 58.8)   |
|           | Larynx cancer | Both   | 212 (129 to 316)    | 1.1 (0.7 to 1.6)   | 3 (-16.2 to 30.9)     | 9360 (6230 to 13000)      | 45.4 (31.1 to 61.7)      | -6.6 (-24.1 to 16.1)  |
|           |               | Male   | 166 (94 to 252)     | 1.6 (0.9 to 2.4)   | 2.5 (-18.6 to 33.3)   | 7370 (4760 to 10300)      | 67.9 (45.3 to 93.7)      | -6.9 (-24.9 to 18.2)  |
|           |               | Female | 46 (27 to 73)       | 0.5 (0.3 to 0.7)   | 5.9 (-17.3 to 37.6)   | 1990 (1290 to 2950)       | 18.8 (12.5 to 26.8)      | -4 (-25.7 to 25.4)    |
| Suriname  | TBL cancer    | Both   | 21 (14 to 29)       | 3.4 (2.3 to 4.8)   | 7.6 (-18.9 to 38.3)   | 2290 (1860 to 2780)       | 367.1 (299.5 to 446)     | 7.4 (-12.2 to 31.3)   |
|           |               | Male   | 14 (9 to 19)        | 4.8 (3.1 to 6.9)   | 4.8 (-24.8 to 42)     | 1500 (1200 to 1850)       | 510.8 (412.8 to 632.2)   | 4.3 (-16.1 to 30.3)   |
|           |               | Female | 7 (5 to 11)         | 2.3 (1.5 to 3.3)   | 14.8 (-18.7 to 62.9)  | 793 (635 to 974)          | 241.7 (193 to 294.7)     | 15.1 (-9.4 to 43.9)   |
|           | Larynx cancer | Both   | 3 (2 to 4)          | 0.5 (0.3 to 0.7)   | 6.4 (-16.9 to 36.5)   | 135 (107 to 167)          | 21.3 (17 to 26.3)        | 2.3 (-19.1 to 28.3)   |
|           |               | Male   | 3 (2 to 4)          | 0.9 (0.6 to 1.3)   | 6.4 (-18.9 to 39.5)   | 116 (91 to 147)           | 38.9 (30.7 to 48.6)      | 2.2 (-20.2 to 29.3)   |
|           |               | Female | 1 (0 to 1)          | 0.2 (0.1 to 0.2)   | 10.8 (-9.3 to 38.4)   | 19 (15 to 24)             | 5.7 (4.6 to 7.1)         | 7.4 (-13.9 to 38.5)   |
| Sweden    | TBL cancer    | Both   | 978 (686 to 1320)   | 4.8 (3.4 to 6.5)   | -6.6 (-24.2 to 11.7)  | 80200 (75300 to 84400)    | 411.3 (388 to 431.9)     | -11 (-15.2 to -6.7)   |

|                            |               |        |                     |                   |                       |                           |                         |                        |
|----------------------------|---------------|--------|---------------------|-------------------|-----------------------|---------------------------|-------------------------|------------------------|
|                            |               | Male   | 468 (312 to 656)    | 4.8 (3.2 to 6.6)  | -14.2 (-36.4 to 12.9) | 39500 (37000 to 41900)    | 412.7 (388.3 to 437.2)  | -16.8 (-21.6 to -11.7) |
|                            |               | Female | 510 (335 to 726)    | 4.9 (3.3 to 7.1)  | 0.7 (-23.8 to 33.6)   | 40700 (37500 to 43600)    | 413.5 (384.7 to 442.2)  | -5.4 (-10.9 to 0.3)    |
|                            | Larynx cancer | Both   | 158 (110 to 220)    | 0.9 (0.6 to 1.2)  | -2.9 (-22.6 to 20.8)  | 1340 (1240 to 1470)       | 7.2 (6.7 to 7.9)        | -10.4 (-17.8 to -1.3)  |
|                            |               | Male   | 136 (94 to 191)     | 1.5 (1 to 2.1)    | -4.8 (-27.6 to 21.9)  | 1070 (971 to 1190)        | 11.7 (10.6 to 13)       | -12.2 (-20.9 to -1.9)  |
|                            |               | Female | 22 (15 to 32)       | 0.3 (0.2 to 0.4)  | -0.2 (-16.6 to 19.1)  | 274 (241 to 310)          | 3 (2.7 to 3.4)          | -8 (-17.6 to 4.7)      |
| Switzerland                | TBL cancer    | Both   | 1070 (704 to 1530)  | 6.6 (4.3 to 9.4)  | -14.2 (-35 to 14.7)   | 76800 (71300 to 81500)    | 488.2 (454.6 to 517.6)  | -17.7 (-22.5 to -13.1) |
|                            |               | Male   | 640 (410 to 923)    | 8.3 (5.3 to 12)   | -19.4 (-42 to 9.2)    | 47200 (43600 to 50900)    | 623.3 (575.5 to 670.1)  | -22.3 (-28.1 to -16.5) |
|                            |               | Female | 430 (285 to 623)    | 5.1 (3.3 to 7.5)  | -7.3 (-35.2 to 26.6)  | 29500 (26900 to 32000)    | 367.9 (338 to 398.1)    | -11.3 (-18.5 to -3.9)  |
|                            | Larynx cancer | Both   | 194 (127 to 285)    | 1.3 (0.8 to 1.9)  | -14.8 (-36.1 to 13.3) | 2100 (1890 to 2350)       | 13.6 (12.3 to 15.2)     | -19.7 (-28.5 to -9.6)  |
|                            |               | Male   | 168 (108 to 246)    | 2.2 (1.5 to 3.3)  | -17 (-39.2 to 11.1)   | 1760 (1560 to 1970)       | 23.6 (20.9 to 26.5)     | -22 (-32.2 to -11.8)   |
|                            |               | Female | 27 (18 to 39)       | 0.4 (0.2 to 0.5)  | -8.5 (-27.3 to 15.6)  | 346 (297 to 410)          | 4.4 (3.8 to 5.2)        | -13.3 (-25.7 to 1.1)   |
| Syria                      | TBL cancer    | Both   | 327 (201 to 485)    | 2.6 (1.6 to 3.7)  | -5.3 (-33.1 to 31.3)  | 36600 (26700 to 49100)    | 271.8 (201.1 to 360.7)  | -5.4 (-29.3 to 24.1)   |
|                            |               | Male   | 233 (140 to 355)    | 3.5 (2.1 to 5.3)  | -7 (-38.4 to 36.3)    | 26600 (19200 to 35700)    | 385.8 (280.8 to 512)    | -6.9 (-32.3 to 25.1)   |
|                            |               | Female | 94 (57 to 138)      | 1.6 (0.9 to 2.2)  | 3.4 (-30.5 to 44)     | 10100 (6890 to 13900)     | 153.7 (105.3 to 208.6)  | 4.1 (-25.2 to 39.7)    |
|                            | Larynx cancer | Both   | 87 (56 to 130)      | 0.7 (0.4 to 1)    | -0.5 (-23.8 to 29.9)  | 2610 (1920 to 3480)       | 19.7 (14.6 to 26)       | -5.6 (-29.9 to 24.5)   |
|                            |               | Male   | 68 (43 to 103)      | 1 (0.7 to 1.5)    | 1 (-25.4 to 39)       | 2210 (1620 to 2970)       | 32.5 (24.1 to 43.6)     | -3.4 (-29.2 to 29.7)   |
|                            |               | Female | 19 (13 to 27)       | 0.3 (0.2 to 0.4)  | 1.3 (-17.4 to 24.6)   | 400 (293 to 543)          | 6.2 (4.6 to 8.2)        | -3.9 (-28.5 to 29.6)   |
| Taiwan (Province of China) | TBL cancer    | Both   | 2970 (1980 to 4190) | 7.5 (5.1 to 10.6) | -8.8 (-30.3 to 20.9)  | 247000 (193000 to 319000) | 631.2 (495.1 to 815.9)  | -3.6 (-24.9 to 24.2)   |
|                            |               | Male   | 1830 (1190 to 2620) | 10 (6.5 to 14.2)  | -9 (-32.7 to 22.7)    | 154000 (121000 to 202000) | 837.3 (657.6 to 1090.6) | -4.7 (-26.1 to 23.8)   |
|                            |               | Female | 1140 (747 to 1630)  | 5.4 (3.6 to 7.8)  | -4.9 (-31.4 to 28.4)  | 92800 (72400 to 120000)   | 451.8 (351.3 to 585.9)  | 1.3 (-21 to 31.1)      |
|                            | Larynx cancer | Both   | 479 (305 to 704)    | 1.2 (0.8 to 1.8)  | 2.5 (-23.6 to 37.5)   | 6320 (4830 to 8400)       | 16.2 (12.4 to 21.5)     | -6.1 (-28.7 to 25.1)   |
|                            |               | Male   | 453 (288 to 669)    | 2.4 (1.5 to 3.6)  | 5.3 (-21.8 to 42.3)   | 5940 (4510 to 7920)       | 32.1 (24.5 to 42.8)     | -3.5 (-26.8 to 28.4)   |
|                            |               | Female | 26 (16 to 38)       | 0.1 (0.1 to 0.2)  | 0 (-24 to 31.2)       | 384 (290 to 519)          | 1.9 (1.5 to 2.6)        | -7.1 (-30 to 20.8)     |

|             |               |        |                     |                   |                       |                           |                        |                       |
|-------------|---------------|--------|---------------------|-------------------|-----------------------|---------------------------|------------------------|-----------------------|
| Tajikistan  | TBL cancer    | Both   | 143 (93 to 207)     | 2.8 (1.8 to 3.9)  | -7.4 (-32.3 to 24.2)  | 17200 (13600 to 21600)    | 297.5 (241.9 to 370.1) | -10.5 (-29.6 to 13.9) |
|             |               | Male   | 98 (61 to 149)      | 4 (2.6 to 5.9)    | -10.1 (-38.5 to 27.3) | 11700 (9240 to 15000)     | 432.7 (343.8 to 548.1) | -13.7 (-33.5 to 11)   |
|             |               | Female | 45 (29 to 66)       | 1.6 (1 to 2.3)    | 5.4 (-26.5 to 54.2)   | 5430 (4290 to 6830)       | 173.7 (139.3 to 217.8) | 3.4 (-19.5 to 32.9)   |
|             | Larynx cancer | Both   | 33 (22 to 50)       | 0.6 (0.4 to 0.9)  | -22.9 (-39.6 to -2)   | 1460 (1110 to 2040)       | 24.2 (18.7 to 32.6)    | -29 (-46.1 to -7.2)   |
|             |               | Male   | 21 (13 to 33)       | 0.8 (0.5 to 1.2)  | -24.5 (-42.1 to -1.1) | 918 (679 to 1340)         | 33.6 (25.4 to 49.9)    | -31.1 (-48.5 to -7.5) |
|             |               | Female | 13 (8 to 18)        | 0.4 (0.3 to 0.6)  | -15.3 (-34.4 to 7.7)  | 538 (401 to 710)          | 15.8 (12.1 to 20.5)    | -20.3 (-41.8 to 5.3)  |
| Thailand    | TBL cancer    | Both   | 5130 (3160 to 7510) | 5 (3.1 to 7.3)    | -8.8 (-36.7 to 25.7)  | 519000 (387000 to 692000) | 507.9 (379.4 to 674)   | -10.9 (-34.7 to 20.2) |
|             |               | Male   | 3330 (2000 to 4970) | 7.2 (4.3 to 10.6) | -9.7 (-38.1 to 32)    | 345000 (252000 to 462000) | 728.6 (534.2 to 969.5) | -11.4 (-36.2 to 22)   |
|             |               | Female | 1790 (1090 to 2670) | 3.2 (2 to 4.8)    | -7.1 (-38.3 to 32.4)  | 174000 (130000 to 233000) | 318.4 (236.3 to 423.5) | -10.1 (-35.7 to 20.8) |
|             | Larynx cancer | Both   | 1150 (724 to 1730)  | 1.1 (0.7 to 1.7)  | 4.5 (-24.9 to 46.2)   | 29000 (20800 to 40000)    | 28 (20.2 to 38.3)      | -8.8 (-36.4 to 26.4)  |
|             |               | Male   | 1050 (651 to 1590)  | 2.2 (1.4 to 3.3)  | 6.4 (-25.1 to 51.8)   | 26600 (18900 to 36900)    | 55.1 (39.5 to 75.3)    | -7.2 (-35.7 to 28.4)  |
|             |               | Female | 104 (69 to 152)     | 0.2 (0.1 to 0.3)  | -11.1 (-32.8 to 17.3) | 2380 (1730 to 3180)       | 4.4 (3.1 to 5.9)       | -24.1 (-47.4 to 5.4)  |
| Timor-Leste | TBL cancer    | Both   | 35 (22 to 52)       | 4.3 (2.7 to 6.2)  | 11.7 (-16.6 to 52.4)  | 4070 (2860 to 5350)       | 475.2 (338 to 623.9)   | 13.9 (-11.1 to 44.9)  |
|             |               | Male   | 25 (14 to 38)       | 6.1 (3.5 to 9.2)  | 10.8 (-22.3 to 55.8)  | 2870 (1880 to 3870)       | 676.7 (452.2 to 896.9) | 12.7 (-12.9 to 45.4)  |
|             |               | Female | 11 (6 to 17)        | 2.5 (1.5 to 4)    | 16.7 (-19.6 to 71.4)  | 1200 (832 to 1720)        | 277.7 (194.7 to 396.3) | 19.1 (-9.8 to 53.9)   |
|             | Larynx cancer | Both   | 5 (3 to 7)          | 0.6 (0.3 to 0.8)  | 23.6 (-1.3 to 53.8)   | 200 (134 to 274)          | 23.7 (16 to 32.1)      | 20.4 (-4.8 to 50.9)   |
|             |               | Male   | 4 (2 to 6)          | 0.9 (0.5 to 1.4)  | 29.3 (0 to 67.2)      | 157 (97 to 225)           | 37.4 (23.5 to 53.5)    | 25.1 (-2.8 to 61.9)   |
|             |               | Female | 1 (1 to 2)          | 0.3 (0.2 to 0.4)  | 9.9 (-11.2 to 35)     | 43 (30 to 55)             | 10.1 (7.1 to 12.9)     | 7.7 (-14.8 to 38)     |
| Togo        | TBL cancer    | Both   | 92 (59 to 138)      | 2.5 (1.6 to 3.8)  | 0.9 (-24.5 to 34.8)   | 10700 (7660 to 14400)     | 271 (199 to 360.5)     | -0.3 (-19.3 to 22.5)  |
|             |               | Male   | 64 (39 to 100)      | 4.3 (2.6 to 6.5)  | -3 (-29.9 to 34.3)    | 7510 (5170 to 10500)      | 450 (319 to 620.1)     | -5 (-22.9 to 17.1)    |
|             |               | Female | 28 (17 to 41)       | 1.3 (0.8 to 2)    | 14.2 (-18.7 to 55.7)  | 3190 (2260 to 4180)       | 141.3 (100.8 to 183.2) | 15.1 (-10.2 to 46.1)  |
|             | Larynx cancer | Both   | 26 (16 to 39)       | 0.7 (0.4 to 1)    | -3.8 (-24.5 to 25)    | 1350 (973 to 1810)        | 33 (24.1 to 44.3)      | -7.8 (-26.2 to 18.9)  |
|             |               | Male   | 24 (15 to 36)       | 1.4 (0.9 to 2.1)  | -3.6 (-26.4 to 26.1)  | 1220 (864 to 1660)        | 69.1 (50.3 to 93)      | -8 (-26.3 to 19.1)    |
|             |               | Female | 3 (2 to 4)          | 0.1 (0.1 to 0.2)  | -2.1 (-23.9 to 26.4)  | 127 (92 to 174)           | 5.6 (4.1 to 7.5)       | -6.9 (-28.4 to 24.1)  |

|                     |               |        |                     |                    |                      |                           |                         |                       |
|---------------------|---------------|--------|---------------------|--------------------|----------------------|---------------------------|-------------------------|-----------------------|
| Tokelau             | TBL cancer    | Both   | 0 (0 to 0)          | 5.4 (3.5 to 7.9)   | 3.1 (-19.6 to 30.4)  | 8 (6 to 10)               | 577.5 (444.3 to 754.9)  | 1.9 (-15 to 23.6)     |
|                     |               | Male   | 0 (0 to 0)          | 6.8 (4.2 to 10.5)  | -3 (-25.7 to 27)     | 5 (4 to 7)                | 718.9 (526.6 to 1014.7) | -3.9 (-21.1 to 17)    |
|                     |               | Female | 0 (0 to 0)          | 4 (2.3 to 6.2)     | 9.4 (-23.1 to 51.6)  | 3 (2 to 4)                | 435.9 (285.9 to 615)    | 8.6 (-13.4 to 37.1)   |
|                     | Larynx cancer | Both   | 0 (0 to 0)          | 0.4 (0.3 to 0.6)   | -1.2 (-17.4 to 18.9) | 0 (0 to 0)                | 13.9 (10.8 to 17.7)     | -10.7 (-26.4 to 6.7)  |
|                     |               | Male   | 0 (0 to 0)          | 0.6 (0.4 to 0.8)   | -3.8 (-22.9 to 21.7) | 0 (0 to 0)                | 18.6 (14.3 to 23.8)     | -12.4 (-30.3 to 8.7)  |
|                     |               | Female | 0 (0 to 0)          | 0.3 (0.2 to 0.4)   | -3.7 (-25.1 to 23.8) | 0 (0 to 0)                | 9.4 (6.7 to 12.8)       | -12 (-34.1 to 16.3)   |
| Tonga               | TBL cancer    | Both   | 5 (3 to 7)          | 6.1 (4 to 8.5)     | 0 (-18.7 to 25.2)    | 523 (421 to 641)          | 658 (532.6 to 804.4)    | -0.4 (-16.5 to 18.6)  |
|                     |               | Male   | 4 (2 to 5)          | 10.1 (6.8 to 14.1) | -2.4 (-22.8 to 25.9) | 402 (321 to 498)          | 1080 (870.1 to 1335)    | -2.8 (-18.6 to 16.9)  |
|                     |               | Female | 1 (1 to 2)          | 2.7 (1.7 to 4.1)   | 10.5 (-21.1 to 58)   | 121 (90 to 158)           | 288.9 (216 to 376.9)    | 10.8 (-13.3 to 41.9)  |
|                     | Larynx cancer | Both   | 0 (0 to 0)          | 0.4 (0.3 to 0.6)   | -1.8 (-19 to 19.1)   | 11 (8 to 14)              | 14.1 (10.8 to 17.8)     | -6.9 (-23 to 12.3)    |
|                     |               | Male   | 0 (0 to 0)          | 0.7 (0.5 to 1)     | -1.7 (-19.7 to 22.4) | 9 (7 to 11)               | 24.3 (18.5 to 31.3)     | -6.9 (-23.2 to 12.8)  |
|                     |               | Female | 0 (0 to 0)          | 0.1 (0.1 to 0.2)   | 1.4 (-21.3 to 29.7)  | 2 (2 to 3)                | 5.4 (4 to 7.3)          | -3 (-27.3 to 27.5)    |
| Trinidad and Tobago | TBL cancer    | Both   | 46 (28 to 68)       | 2.4 (1.5 to 3.6)   | -6.8 (-34.6 to 31.3) | 4690 (3490 to 6180)       | 250.9 (187.3 to 331.2)  | -8.6 (-33 to 20.9)    |
|                     |               | Male   | 34 (21 to 51)       | 3.8 (2.3 to 5.6)   | -8.8 (-39 to 33.6)   | 3550 (2610 to 4740)       | 386.1 (286.3 to 513.5)  | -10.6 (-34.7 to 19.8) |
|                     |               | Female | 12 (7 to 18)        | 1.2 (0.7 to 1.8)   | -0.9 (-30.9 to 39.3) | 1140 (826 to 1520)        | 121.3 (87.5 to 162.8)   | -2.5 (-28.2 to 31.3)  |
|                     | Larynx cancer | Both   | 11 (7 to 17)        | 0.6 (0.4 to 0.9)   | -5.4 (-31.8 to 26.1) | 425 (311 to 560)          | 22.9 (16.8 to 30.1)     | -9.1 (-34.2 to 21.6)  |
|                     |               | Male   | 10 (7 to 15)        | 1.2 (0.7 to 1.7)   | -6.3 (-32.4 to 25.8) | 398 (291 to 526)          | 44 (32.5 to 58.2)       | -9.9 (-35 to 20.7)    |
|                     |               | Female | 1 (1 to 1)          | 0.1 (0.1 to 0.1)   | 2.3 (-19.2 to 30.5)  | 27 (20 to 37)             | 2.8 (2.1 to 3.8)        | -1.3 (-27.7 to 32.6)  |
| Tunisia             | TBL cancer    | Both   | 557 (330 to 850)    | 4.3 (2.6 to 6.6)   | -0.9 (-28.9 to 37.3) | 61300 (42500 to 85500)    | 467.4 (325.7 to 648.4)  | -2.5 (-27.7 to 30.7)  |
|                     |               | Male   | 490 (284 to 754)    | 7.8 (4.6 to 12)    | -1.7 (-30.1 to 38.5) | 55100 (38100 to 77700)    | 857.4 (592.6 to 1198.4) | -3 (-28.2 to 31.5)    |
|                     |               | Female | 67 (41 to 102)      | 1 (0.6 to 1.6)     | 11 (-19.9 to 53.7)   | 6170 (4440 to 8310)       | 93 (66.8 to 125.1)      | 6.5 (-19.6 to 43.3)   |
|                     | Larynx cancer | Both   | 269 (162 to 421)    | 2.1 (1.2 to 3.2)   | 8.9 (-22.8 to 55.7)  | 7540 (5310 to 10500)      | 57.3 (40.5 to 79.4)     | -7.2 (-30.4 to 28.3)  |
|                     |               | Male   | 247 (146 to 389)    | 3.9 (2.3 to 6)     | 9.6 (-23.2 to 59.7)  | 7040 (4900 to 9880)       | 109.3 (76.8 to 152.4)   | -6.5 (-30.8 to 29.9)  |
|                     |               | Female | 22 (13 to 32)       | 0.3 (0.2 to 0.5)   | 7.5 (-19.9 to 43.2)  | 499 (355 to 677)          | 7.5 (5.3 to 10.1)       | -9.5 (-33.8 to 23.9)  |
| Turkey              | TBL cancer    | Both   | 6700 (4550 to 9480) | 7.5 (5.1 to 10.5)  | -3.1 (-27.5 to 29.4) | 737000 (582000 to 921000) | 807.1 (638.5 to 1008.2) | -6.2 (-27.5 to 22.6)  |
|                     |               | Male   | 5470 (3700 to 7850) | 12.8 (8.7 to 18.3) | -6.2 (-31.2 to 27.1) | 620000 (489000 to 780000) | 1419 (1120.9 to 1780.4) | -8.5 (-29.8 to 20.1)  |
|                     |               | Female | 1240 (795 to 1800)  | 2.6 (1.7 to 3.9)   | 13 (-20.2 to 58.5)   | 117000 (92500 to 146000)  | 247.6 (196.4 to 308.7)  | 7.2 (-17 to 39.9)     |
|                     | Larynx cancer | Both   | 1300 (864 to 1830)  | 1.4 (1 to 2)       | -7.8 (-30.1 to 24.7) | 34200 (26400 to 43200)    | 37.7 (29.1 to 47.6)     | -23.3 (-41 to 0.5)    |

|              |               |        |                     |                   |                      |                           |                         |                       |
|--------------|---------------|--------|---------------------|-------------------|----------------------|---------------------------|-------------------------|-----------------------|
|              |               | Male   | 1130 (748 to 1620)  | 2.6 (1.8 to 3.8)  | -8.7 (-32.9 to 26.9) | 30400 (23200 to 38600)    | 70.5 (54.1 to 89.3)     | -23.8 (-42 to 0.5)    |
|              |               | Female | 174 (114 to 245)    | 0.4 (0.2 to 0.5)  | -1.7 (-24.4 to 29.1) | 3870 (3020 to 4980)       | 8.2 (6.4 to 10.6)       | -18.4 (-38.2 to 9.8)  |
| Turkmenistan | TBL cancer    | Both   | 102 (65 to 147)     | 2.4 (1.5 to 3.4)  | 15.5 (-16.9 to 54.9) | 11800 (9290 to 14900)     | 263.5 (208 to 332.8)    | 14.6 (-9.6 to 45.3)   |
|              |               | Male   | 76 (48 to 112)      | 3.9 (2.5 to 5.8)  | 14 (-23 to 62)       | 8960 (6950 to 11500)      | 434.6 (339.9 to 548.3)  | 13.1 (-11.8 to 44.4)  |
|              |               | Female | 26 (17 to 38)       | 1.2 (0.8 to 1.7)  | 17.9 (-7.8 to 48.8)  | 2850 (2190 to 3690)       | 121.5 (93.9 to 156.6)   | 17.1 (-8.9 to 47.9)   |
|              | Larynx cancer | Both   | 29 (20 to 41)       | 0.7 (0.5 to 1)    | -1.1 (-20 to 23.6)   | 1140 (892 to 1460)        | 25.6 (20.2 to 32.7)     | -9 (-29.1 to 15.2)    |
|              |               | Male   | 20 (14 to 29)       | 1 (0.7 to 1.5)    | 7.6 (-14.4 to 37)    | 833 (651 to 1060)         | 40.9 (32.3 to 51.9)     | -0.2 (-22.7 to 28.1)  |
|              |               | Female | 9 (6 to 13)         | 0.4 (0.3 to 0.6)  | -16.5 (-34.1 to 9.1) | 308 (234 to 421)          | 13 (9.9 to 17.6)        | -26.8 (-44.4 to -2.7) |
| Tuvalu       | TBL cancer    | Both   | 1 (0 to 1)          | 5.7 (3.6 to 8.5)  | 1 (-22.4 to 29)      | 68 (49 to 94)             | 639.6 (466.2 to 880.4)  | 1.3 (-17.3 to 22.3)   |
|              |               | Male   | 0 (0 to 1)          | 8.4 (5.2 to 13.2) | -2.4 (-26.5 to 29.7) | 47 (34 to 69)             | 939.6 (681.4 to 1349)   | -2.3 (-20.3 to 19)    |
|              |               | Female | 0 (0 to 0)          | 3.4 (2 to 5.1)    | 5 (-25.1 to 43.2)    | 21 (14 to 29)             | 371.8 (261.2 to 515.6)  | 5.3 (-16.5 to 30.7)   |
|              | Larynx cancer | Both   | 0 (0 to 0)          | 0.6 (0.3 to 0.8)  | -1 (-19.7 to 22.4)   | 2 (2 to 3)                | 22.1 (15.9 to 30)       | -5.7 (-23.4 to 17.3)  |
|              |               | Male   | 0 (0 to 0)          | 0.9 (0.6 to 1.4)  | -0.8 (-22.5 to 26.4) | 2 (1 to 2)                | 35.5 (24.3 to 48.5)     | -5.7 (-25.4 to 18.9)  |
|              |               | Female | 0 (0 to 0)          | 0.3 (0.2 to 0.4)  | -6 (-27.6 to 21.2)   | 1 (0 to 1)                | 10.3 (7.3 to 14.4)      | -11 (-33 to 18.5)     |
| Uganda       | TBL cancer    | Both   | 239 (152 to 336)    | 1.7 (1.1 to 2.4)  | 5.7 (-19.3 to 37.8)  | 27500 (21600 to 33800)    | 180.8 (143 to 217.7)    | 6.3 (-13.4 to 27.9)   |
|              |               | Male   | 148 (93 to 216)     | 2.4 (1.6 to 3.6)  | -0.9 (-29.7 to 38.8) | 17100 (13100 to 21400)    | 258.2 (202.9 to 314.7)  | -1 (-20.1 to 21.1)    |
|              |               | Female | 91 (54 to 136)      | 1.1 (0.7 to 1.7)  | 20.9 (-13.9 to 70.4) | 10500 (7800 to 13500)     | 121.4 (90.7 to 155.4)   | 23.7 (-7.1 to 58.9)   |
|              | Larynx cancer | Both   | 118 (79 to 167)     | 0.8 (0.5 to 1)    | -3.7 (-22.4 to 19.6) | 6210 (4710 to 7940)       | 37.7 (29.3 to 47.7)     | -6.9 (-25.6 to 16.5)  |
|              |               | Male   | 88 (59 to 126)      | 1.3 (0.9 to 1.8)  | -5 (-24.7 to 21)     | 4740 (3620 to 6160)       | 64.3 (49.8 to 83.4)     | -8 (-27.7 to 16.7)    |
|              |               | Female | 30 (19 to 42)       | 0.3 (0.2 to 0.5)  | 2.6 (-19.6 to 31.9)  | 1470 (1070 to 1920)       | 16 (11.9 to 20.7)       | -0.5 (-23.8 to 30.7)  |
| Ukraine      | TBL cancer    | Both   | 5010 (3350 to 6840) | 6.8 (4.6 to 9.3)  | 15.7 (-11.9 to 48.7) | 447000 (366000 to 534000) | 624.3 (511.1 to 747.8)  | 15.3 (-6.1 to 39.6)   |
|              |               | Male   | 4160 (2690 to 5780) | 14 (9.2 to 19.5)  | 14.6 (-14.9 to 49.9) | 379000 (300000 to 464000) | 1275.5 (1012 to 1566.4) | 14.3 (-10.4 to 43)    |
|              |               | Female | 852 (538 to 1210)   | 1.9 (1.2 to 2.8)  | 11.3 (-19.7 to 47.4) | 68200 (53700 to 85700)    | 166.3 (129.8 to 210.7)  | 11.7 (-13.2 to 43.5)  |
|              | Larynx cancer | Both   | 1540 (996 to 2150)  | 2.2 (1.4 to 3.1)  | 16.2 (-13 to 53.1)   | 49700 (38600 to 62400)    | 71 (54.9 to 89.2)       | 14.6 (-11.5 to 45.1)  |

|                      |               |        |                       |                    |                        |                           |                        |                       |
|----------------------|---------------|--------|-----------------------|--------------------|------------------------|---------------------------|------------------------|-----------------------|
|                      |               | Male   | 1450 (926 to 2050)    | 4.9 (3.2 to 6.9)   | 14.3 (-16.5 to 53.9)   | 48100 (36900 to 61000)    | 162.3 (124.6 to 204.7) | 12.5 (-14 to 42.8)    |
|                      |               | Female | 92 (60 to 136)        | 0.2 (0.2 to 0.4)   | 10.6 (-10.5 to 36.2)   | 1530 (1160 to 2080)       | 4.1 (3.1 to 5.5)       | 10.4 (-17.6 to 45.5)  |
| United Arab Emirates | TBL cancer    | Both   | 131 (80 to 199)       | 4 (2.4 to 6.2)     | -17.7 (-41 to 12.9)    | 16600 (12000 to 22000)    | 402.5 (292.4 to 553)   | -17.3 (-36.4 to 7.1)  |
|                      |               | Male   | 104 (63 to 164)       | 4.5 (2.7 to 7)     | -15 (-40.4 to 17.6)    | 13300 (9470 to 18100)     | 464.2 (340.2 to 640.3) | -14.7 (-33.1 to 9.1)  |
|                      |               | Female | 27 (15 to 41)         | 2.8 (1.4 to 4.7)   | -28 (-59.2 to 21.3)    | 3270 (2240 to 4330)       | 272.1 (163.1 to 391.9) | -28.4 (-54.3 to 7.8)  |
|                      | Larynx cancer | Both   | 133 (78 to 214)       | 2.1 (1.3 to 3.2)   | -8 (-29.7 to 22.9)     | 5340 (3360 to 8270)       | 74.2 (51.3 to 105.1)   | -14.6 (-33.1 to 10.3) |
|                      |               | Male   | 121 (69 to 197)       | 2.6 (1.6 to 4)     | -5.3 (-29.3 to 29.5)   | 4990 (3090 to 7890)       | 93.9 (63.8 to 135)     | -13.1 (-33 to 13.6)   |
|                      |               | Female | 12 (8 to 18)          | 0.7 (0.5 to 1.1)   | -36.7 (-50.2 to -16.2) | 349 (234 to 506)          | 20.3 (13.7 to 28.2)    | -43.3 (-57 to -24.8)  |
| United Kingdom       | TBL cancer    | Both   | 12500 (8850 to 16500) | 10 (7 to 13.2)     | -3.2 (-18.5 to 14.5)   | 784000 (743000 to 817000) | 656.4 (626.5 to 682.5) | -7.1 (-9.8 to -4.7)   |
|                      |               | Male   | 6780 (4610 to 9290)   | 11.6 (7.8 to 15.9) | -7.6 (-27.2 to 16.1)   | 431000 (412000 to 447000) | 762.1 (730.6 to 789.4) | -10.9 (-13.1 to -8.7) |
|                      |               | Female | 5750 (3950 to 7950)   | 8.6 (5.9 to 12)    | 1.2 (-19.7 to 28.5)    | 353000 (328000 to 376000) | 564 (529.2 to 598.2)   | -3 (-7.7 to 1.6)      |
|                      | Larynx cancer | Both   | 2090 (1460 to 2880)   | 1.8 (1.3 to 2.5)   | 0.1 (-16.3 to 19.9)    | 19100 (18200 to 19700)    | 16.8 (16.1 to 17.3)    | -7.5 (-10 to -5)      |
|                      |               | Male   | 1440 (971 to 2030)    | 2.6 (1.8 to 3.7)   | -1 (-22 to 24.6)       | 15400 (14800 to 16000)    | 28.4 (27.2 to 29.4)    | -8.9 (-11.9 to -6)    |
|                      |               | Female | 644 (427 to 916)      | 1.1 (0.8 to 1.6)   | 0.6 (-16.6 to 22.3)    | 3660 (2970 to 3940)       | 6.2 (5.2 to 6.7)       | -4.3 (-8.5 to -0.4)   |
| Tanzania             | TBL cancer    | Both   | 497 (298 to 818)      | 2 (1.2 to 3.3)     | 5.7 (-21.8 to 38.9)    | 56400 (39800 to 82800)    | 218.9 (156.7 to 317.8) | 5.7 (-14.8 to 27.7)   |
|                      |               | Male   | 352 (192 to 625)      | 3.1 (1.7 to 5.4)   | 0.8 (-29.7 to 38.5)    | 39900 (26700 to 62800)    | 328 (222.8 to 510.6)   | 0.5 (-20.2 to 23)     |
|                      |               | Female | 146 (96 to 212)       | 1.1 (0.7 to 1.6)   | 15.7 (-13.6 to 57.8)   | 16500 (12700 to 20700)    | 118.6 (93.7 to 145.3)  | 17.3 (-6.2 to 46.3)   |
|                      | Larynx cancer | Both   | 179 (119 to 263)      | 0.7 (0.5 to 1)     | -2.5 (-22 to 20.5)     | 9210 (6860 to 13000)      | 33.3 (25.1 to 46.8)    | -6 (-25.8 to 17.6)    |
|                      |               | Male   | 139 (91 to 214)       | 1.1 (0.7 to 1.7)   | -4 (-24.4 to 21)       | 7270 (5240 to 10800)      | 54.7 (40 to 81)        | -7.1 (-27 to 18.2)    |
|                      |               | Female | 40 (27 to 58)         | 0.3 (0.2 to 0.4)   | -0.3 (-22.2 to 26.5)   | 1940 (1450 to 2540)       | 13.2 (10.1 to 17)      | -3.5 (-26.8 to 25.5)  |
| Virgin Islands       | TBL cancer    | Both   | 10 (7 to 14)          | 5.5 (3.7 to 7.6)   | -4.8 (-22 to 15.3)     | 1000 (827 to 1170)        | 547.1 (448.7 to 640.9) | -4.7 (-19 to 9.5)     |
|                      |               | Male   | 7 (4 to 9)            | 7.9 (5.3 to 11.2)  | -5.1 (-26.4 to 19.1)   | 663 (531 to 792)          | 800.2 (643.8 to 963.9) | -4.2 (-19.4 to 13)    |

|                          |               |        |                        |                    |                       |                              |                           |                        |
|--------------------------|---------------|--------|------------------------|--------------------|-----------------------|------------------------------|---------------------------|------------------------|
|                          | Larynx cancer | Female | 4 (2 to 5)             | 3.5 (2.3 to 5)     | -1.4 (-27.7 to 30.1)  | 338 (275 to 409)             | 336.4 (270.1 to 409.1)    | -2.7 (-21.1 to 17.2)   |
|                          |               | Both   | 3 (2 to 4)             | 1.4 (1 to 2)       | -3.8 (-24.2 to 22.3)  | 91 (74 to 109)               | 50.1 (40.5 to 60.2)       | -3.4 (-21 to 15.7)     |
|                          |               | Male   | 2 (2 to 3)             | 2.9 (2 to 4)       | -0.9 (-22.9 to 27.9)  | 86 (69 to 103)               | 103.2 (82.8 to 124.4)     | -0.5 (-18.8 to 19.7)   |
|                          |               | Female | 0 (0 to 0)             | 0.2 (0.2 to 0.3)   | -7.5 (-22.3 to 10.4)  | 6 (5 to 7)                   | 5.9 (4.7 to 7.3)          | -8.6 (-26.1 to 12.4)   |
| United States of America | TBL cancer    | Both   | 61800 (43900 to 80400) | 11.1 (7.9 to 14.4) | -11.4 (-23.4 to 2.1)  | 4120000 (3950000 to 4260000) | 756.3 (725.4 to 781)      | -11 (-13.6 to -8.6)    |
|                          |               | Male   | 33100 (22500 to 44400) | 12.9 (8.8 to 17.3) | -12.6 (-29.4 to 5.9)  | 2310000 (2240000 to 2390000) | 909.3 (879.2 to 939.3)    | -12.2 (-14.2 to -9.3)  |
|                          |               | Female | 28700 (20400 to 38300) | 9.6 (6.8 to 12.8)  | -10.5 (-26.9 to 8.7)  | 1810000 (1690000 to 1920000) | 624.2 (586.5 to 659.3)    | -9.8 (-14.5 to -5.4)   |
|                          | Larynx cancer | Both   | 9760 (6700 to 13200)   | 1.8 (1.3 to 2.5)   | -5.5 (-19.8 to 12.3)  | 108000 (104000 to 112000)    | 20.3 (19.6 to 21.1)       | -7 (-10 to -3.8)       |
|                          |               | Male   | 7910 (5350 to 10900)   | 3.1 (2.1 to 4.3)   | -5.8 (-23.1 to 15.3)  | 86800 (83000 to 90400)       | 34.6 (33.1 to 36)         | -6.8 (-10.6 to -2.9)   |
|                          |               | Female | 1850 (1270 to 2530)    | 0.7 (0.5 to 0.9)   | -7 (-21.4 to 10.3)    | 21200 (19800 to 23000)       | 7.6 (7.1 to 8.3)          | -9.6 (-13.7 to -4.7)   |
| Uruguay                  | TBL cancer    | Both   | 398 (255 to 568)       | 7.9 (5.1 to 11.4)  | -4.1 (-27.7 to 24.4)  | 39100 (36400 to 41600)       | 805.2 (749.3 to 857.3)    | -6.4 (-13.1 to 0.5)    |
|                          |               | Male   | 290 (186 to 409)       | 13.1 (8.4 to 18.4) | -10 (-33.1 to 19.3)   | 29100 (27100 to 31000)       | 1331.6 (1239.9 to 1419.8) | -11.7 (-18.2 to -5.2)  |
|                          |               | Female | 107 (64 to 159)        | 3.8 (2.3 to 5.8)   | 15.5 (-22.9 to 68)    | 10100 (9190 to 11000)        | 379.6 (347.9 to 413.8)    | 11.9 (1.4 to 22.4)     |
|                          | Larynx cancer | Both   | 121 (80 to 173)        | 2.5 (1.6 to 3.5)   | -1.1 (-28.2 to 31.1)  | 3140 (2820 to 3470)          | 65 (58.1 to 72.2)         | -7.8 (-18.2 to 4.5)    |
|                          |               | Male   | 108 (70 to 156)        | 4.9 (3.2 to 7.1)   | -1.9 (-29.6 to 32.8)  | 2860 (2550 to 3200)          | 131.6 (117.3 to 146.9)    | -8.3 (-19.1 to 4.6)    |
|                          |               | Female | 13 (8 to 19)           | 0.5 (0.3 to 0.7)   | 2.5 (-23.7 to 40.3)   | 280 (230 to 326)             | 10.2 (8.4 to 11.9)        | -5.9 (-19.4 to 10.5)   |
| Uzbekistan               | TBL cancer    | Both   | 673 (444 to 943)       | 2.9 (2 to 4)       | 6.8 (-17.7 to 36.2)   | 79900 (65900 to 96000)       | 317.9 (264.7 to 376.9)    | 6.8 (-11.2 to 27.1)    |
|                          |               | Male   | 479 (309 to 688)       | 4.7 (3.1 to 6.6)   | 4 (-24.7 to 41.2)     | 57300 (46600 to 69600)       | 505.6 (418.1 to 605.2)    | 4 (-14.8 to 25.5)      |
|                          |               | Female | 194 (127 to 277)       | 1.6 (1 to 2.3)     | 13.5 (-16.9 to 52.2)  | 22600 (18400 to 27400)       | 167.9 (139.1 to 201.2)    | 14.9 (-5.7 to 38.9)    |
|                          | Larynx cancer | Both   | 300 (209 to 418)       | 1.2 (0.8 to 1.7)   | -22.5 (-35.3 to -8)   | 11300 (9350 to 13500)        | 43.9 (36.6 to 52.1)       | -31.5 (-43.9 to -18.2) |
|                          |               | Male   | 175 (119 to 243)       | 1.6 (1.1 to 2.2)   | -20.6 (-36.5 to -1.9) | 6960 (5660 to 8390)          | 61.3 (50.8 to 73.3)       | -29.9 (-42.4 to -14.7) |
|                          |               | Female | 125 (85 to 179)        | 0.9 (0.6 to 1.3)   | -24.6 (-39.1 to -3.4) | 4340 (3480 to 5310)          | 30.4 (24.8 to 36.8)       | -33.6 (-47 to -10.8)   |

|           |               |        |                     |                   |                      |                           |                          |                      |
|-----------|---------------|--------|---------------------|-------------------|----------------------|---------------------------|--------------------------|----------------------|
| Vanuatu   | TBL cancer    | Both   | 9 (6 to 15)         | 5.4 (3.2 to 8.7)  | 4.4 (-17.2 to 36.3)  | 1120 (735 to 1690)        | 610.1 (403.5 to 917.5)   | 4.1 (-12.3 to 26.2)  |
|           |               | Male   | 8 (4 to 13)         | 8.3 (4.5 to 13.9) | 2.4 (-21.3 to 36)    | 904 (544 to 1450)         | 940.4 (567.3 to 1502.6)  | 2 (-13.4 to 23.2)    |
|           |               | Female | 2 (1 to 3)          | 2.3 (1.3 to 3.6)  | 12 (-20.4 to 60.6)   | 218 (137 to 318)          | 248.5 (159.7 to 359.9)   | 11.6 (-10.7 to 39)   |
|           | Larynx cancer | Both   | 1 (1 to 1)          | 0.5 (0.3 to 0.8)  | 1.8 (-17.6 to 25.4)  | 43 (29 to 59)             | 23.6 (16.1 to 32.5)      | -0.6 (-19.3 to 20.8) |
|           |               | Male   | 1 (0 to 1)          | 0.8 (0.5 to 1.2)  | 2 (-20.4 to 29.2)    | 34 (22 to 48)             | 36.4 (23.7 to 50.3)      | -0.6 (-20.7 to 22.3) |
|           |               | Female | 0 (0 to 0)          | 0.2 (0.1 to 0.3)  | 1.3 (-19.8 to 28.3)  | 9 (5 to 13)               | 9.5 (6 to 13.8)          | -0.9 (-24.1 to 29.6) |
| Venezuela | TBL cancer    | Both   | 1340 (870 to 1990)  | 4.6 (3 to 6.7)    | -2.1 (-30.1 to 33.2) | 137000 (101000 to 178000) | 455.6 (335 to 589.1)     | -2.9 (-27.6 to 26.2) |
|           |               | Male   | 796 (494 to 1180)   | 5.8 (3.6 to 8.5)  | -5.9 (-34.8 to 29.7) | 85900 (62800 to 112000)   | 603.5 (445.3 to 785.3)   | -6.1 (-30.9 to 22.9) |
|           |               | Female | 545 (331 to 827)    | 3.5 (2.1 to 5.3)  | 3.1 (-31.3 to 53.3)  | 51000 (36300 to 70400)    | 323.7 (231.2 to 447.9)   | 2 (-27 to 41.1)      |
|           | Larynx cancer | Both   | 449 (284 to 662)    | 1.5 (1 to 2.2)    | -1 (-31.6 to 33.4)   | 15500 (11400 to 20700)    | 51.4 (38 to 68)          | -4.2 (-30 to 27.9)   |
|           |               | Male   | 377 (233 to 563)    | 2.7 (1.7 to 3.9)  | -2.3 (-34.6 to 37.3) | 13600 (9910 to 18200)     | 94.8 (69.6 to 126.3)     | -5.4 (-31.3 to 27.7) |
|           |               | Female | 72 (47 to 105)      | 0.5 (0.3 to 0.7)  | 2.5 (-23.1 to 34.3)  | 1940 (1450 to 2620)       | 12.4 (9.3 to 16.6)       | -0.2 (-26.2 to 31)   |
| Vietnam   | TBL cancer    | Both   | 5930 (3920 to 8370) | 6.1 (4 to 8.5)    | 6.9 (-17.2 to 35.1)  | 671000 (511000 to 868000) | 662.7 (507.3 to 845.3)   | 4.6 (-16.2 to 28)    |
|           |               | Male   | 4280 (2720 to 6200) | 10 (6.5 to 14.2)  | 3.9 (-21.5 to 34.4)  | 495000 (373000 to 638000) | 1092.4 (831.7 to 1389.7) | 2.1 (-18.9 to 26.1)  |
|           |               | Female | 1650 (1020 to 2460) | 3.1 (1.9 to 4.6)  | 12.5 (-22.1 to 57.6) | 176000 (132000 to 233000) | 322.2 (242.6 to 422)     | 8.9 (-15.5 to 36.9)  |
|           | Larynx cancer | Both   | 1630 (1060 to 2370) | 1.6 (1.1 to 2.3)  | 20.3 (-9.7 to 56.6)  | 51200 (38700 to 65900)    | 49.4 (37.8 to 62.9)      | 1.6 (-19.5 to 26.6)  |
|           |               | Male   | 1510 (985 to 2210)  | 3.3 (2.2 to 4.8)  | 19.7 (-11 to 59.8)   | 47700 (35800 to 62100)    | 102.9 (78.4 to 131.7)    | 1.1 (-20 to 25.3)    |
|           |               | Female | 118 (75 to 172)     | 0.2 (0.1 to 0.3)  | 8.2 (-15.9 to 38.9)  | 3460 (2510 to 4630)       | 6.3 (4.6 to 8.3)         | -7.1 (-29.4 to 21.9) |
| Yemen     | TBL cancer    | Both   | 308 (181 to 505)    | 2.3 (1.3 to 3.8)  | -1.7 (-30.1 to 31)   | 35900 (24200 to 53400)    | 246.5 (168 to 365.2)     | -1.9 (-21.3 to 21.9) |
|           |               | Male   | 236 (130 to 412)    | 3.6 (2 to 6.1)    | -2.8 (-32.9 to 35.1) | 27500 (17900 to 43900)    | 390.3 (252.3 to 616.5)   | -2.9 (-23.7 to 22.1) |
|           |               | Female | 72 (46 to 109)      | 1 (0.7 to 1.5)    | 7.3 (-23.6 to 40.3)  | 8390 (5950 to 11500)      | 106.4 (78 to 144.1)      | 8.7 (-19.9 to 38.2)  |
|           | Larynx cancer | Both   | 189 (114 to 294)    | 1.3 (0.8 to 2)    | 5 (-18.4 to 32.8)    | 9220 (6160 to 12900)      | 61.4 (42.2 to 84.5)      | 2.5 (-18.6 to 27.9)  |
|           |               | Male   | 147 (83 to 231)     | 2.1 (1.2 to 3.3)  | 5.6 (-19.8 to 37.5)  | 7250 (4670 to 10400)      | 99.4 (65.4 to 141.1)     | 3.2 (-19.9 to 31.4)  |



|          |               |        |                  |                  |                       |                        |                        |                       |
|----------|---------------|--------|------------------|------------------|-----------------------|------------------------|------------------------|-----------------------|
|          |               | Female | 42 (25 to 67)    | 0.6 (0.3 to 0.9) | 7.7 (-17.6 to 39.5)   | 1970 (1290 to 2780)    | 24.4 (16.6 to 34.5)    | 5.2 (-19.2 to 37.9)   |
| Zambia   | TBL cancer    | Both   | 165 (105 to 247) | 2.5 (1.6 to 3.6) | 2 (-25.4 to 35.8)     | 19600 (13900 to 25900) | 267.5 (190.9 to 349.5) | 0.1 (-22 to 27.2)     |
|          |               | Male   | 113 (64 to 176)  | 3.6 (2.1 to 5.5) | -2.3 (-32.4 to 36.1)  | 13400 (8750 to 18600)  | 391.3 (257.3 to 531.8) | -4.8 (-26.9 to 24.5)  |
|          |               | Female | 52 (30 to 82)    | 1.4 (0.8 to 2.3) | 17.6 (-21.9 to 68.4)  | 6160 (4230 to 8560)    | 156.3 (110.2 to 213.8) | 15.8 (-12.3 to 52)    |
|          | Larynx cancer | Both   | 64 (41 to 97)    | 0.8 (0.6 to 1.3) | -6.3 (-29.1 to 19.6)  | 3440 (2510 to 4730)    | 42.9 (31.6 to 57.6)    | -13.1 (-33.7 to 13.4) |
|          |               | Male   | 51 (32 to 78)    | 1.4 (0.9 to 2.1) | -5.8 (-30 to 22.6)    | 2780 (1990 to 3900)    | 71.6 (51.9 to 98.9)    | -12.9 (-34.8 to 16.4) |
|          |               | Female | 13 (9 to 20)     | 0.3 (0.2 to 0.5) | -8.2 (-29.6 to 21.3)  | 659 (457 to 919)       | 15.6 (11 to 21.6)      | -16.1 (-37.7 to 13.9) |
| Zimbabwe | TBL cancer    | Both   | 237 (157 to 339) | 3.3 (2.2 to 4.7) | 1.1 (-22.4 to 31.7)   | 28600 (21600 to 35600) | 368.9 (282.1 to 451.1) | 0.6 (-18.4 to 21.4)   |
|          |               | Male   | 133 (84 to 193)  | 4.4 (2.8 to 6.2) | 0.7 (-28.2 to 40.7)   | 16600 (12800 to 20700) | 499.9 (392.7 to 608.5) | -3 (-22.9 to 20.1)    |
|          |               | Female | 104 (63 to 158)  | 2.5 (1.5 to 3.8) | 3.2 (-29.3 to 52.7)   | 12000 (8390 to 15800)  | 272.9 (191.5 to 363)   | 7.8 (-19.6 to 45.5)   |
|          | Larynx cancer | Both   | 90 (61 to 126)   | 1.2 (0.8 to 1.6) | -2.9 (-21.8 to 19.3)  | 5040 (3910 to 6410)    | 61.9 (49.1 to 77.5)    | -7.2 (-26.2 to 14.7)  |
|          |               | Male   | 70 (47 to 100)   | 2.1 (1.4 to 3)   | 0.8 (-20.8 to 28.9)   | 4060 (3200 to 5190)    | 116 (92.7 to 144.5)    | -5.4 (-25.3 to 18.3)  |
|          |               | Female | 20 (12 to 30)    | 0.4 (0.3 to 0.7) | -10.2 (-32.8 to 21.5) | 976 (672 to 1360)      | 21.2 (14.8 to 29)      | -10.6 (-34.3 to 23.7) |

**Table S4. Tracheal, bronchus, and lung (TBL) cancer deaths (counts and age-standardised rates) attributable to specific risk factors in 2019, at global, regional, national levels, and Socio-demographic Index (SDI) quintiles, by sex and for both sexes combined.**

95% UIs given in parentheses.

| Location | Sex    | Smoking                      |                        | Ambient particulate matter pollution |                     | Household air pollution from solid fuels |                     | Secondhand smoke           |                     | Residential radon          |                     | Diet low in fruits         |                     | High fasting plasma glucose |                      | Occupational exposure to asbestos |                     | Occupational exposure excluding asbestos |                     |
|----------|--------|------------------------------|------------------------|--------------------------------------|---------------------|------------------------------------------|---------------------|----------------------------|---------------------|----------------------------|---------------------|----------------------------|---------------------|-----------------------------|----------------------|-----------------------------------|---------------------|------------------------------------------|---------------------|
|          |        | Number                       | ASD R per 100,000      | Number                               | ASD R per 100,000   | Number                                   | ASD R per 100,000   | Number                     | ASD R per 100,000   | Number                     | ASD R per 100,000   | Number                     | ASD R per 100,000   | Number                      | ASD R per 100,000    | Number                            | ASD R per 100,000   | Number                                   | ASD R per 100,000   |
| Global   | Both   | 131000<br>(120000 to 143000) | 16.1<br>(14.7 to 17.5) | 30800<br>(22700 to 39600)            | 3.8<br>(2.8 to 4.9) | 79800<br>(45100 to 125000)               | 1 (0.5 to 1.5)      | 11300<br>(67500 to 170000) | 1.4<br>(0.8 to 2.1) | 83700<br>(16500 to 162000) | 1 (0.2 to 2)        | 77200<br>(22600 to 115000) | 1 (0.3 to 1.4)      | 17900<br>(42700 to 38900)   | 2.2<br>(0.5 to 4.8)  | 19900<br>(14000 to 25700)         | 2.5<br>(1.8 to 3.3) | 99600<br>(44100 to 164000)               | 1.1<br>(0.5 to 1.9) |
|          | Male   | 106000<br>(95200 to 117000)  | 28.5<br>(25.7 to 31.3) | 21600<br>(15700 to 28100)            | 5.8<br>(4.2 to 7.5) | 51200<br>(27700 to 82200)                | 1.3<br>(0.7 to 2.1) | 66300<br>(38300 to 101000) | 1.8 (1 to 2.7)      | 56800<br>(11300 to 110000) | 1.5<br>(0.3 to 2.9) | 52300<br>(15200 to 78600)  | 1.4<br>(0.4 to 2.1) | 12400<br>(21100 to 28600)   | 3.4<br>(0.6 to 7.9)  | 17200<br>(11600 to 23100)         | 5.1<br>(3.5 to 6.8) | 73900<br>(31400 to 123000)               | 1.8<br>(0.7 to 3)   |
|          | Female | 255000<br>(230000 to 277000) | 5.8<br>(5.2 to 6.3)    | 91300<br>(65500 to 119000)           | 2.1<br>(1.5 to 2.7) | 28500<br>(16000 to 44500)                | 0.7<br>(0.4 to 1)   | 47200<br>(27700 to 71200)  | 1.1<br>(0.6 to 1.6) | 26900<br>(5220 to 52200)   | 0.6<br>(0.1 to 1.2) | 24900<br>(7200 to 37400)   | 0.6<br>(0.2 to 0.9) | 54900<br>(10800 to 129000)  | 1.3<br>(0.2 to 2.9)  | 26500<br>(15600 to 37200)         | 0.6<br>(0.4 to 0.8) | 25700<br>(10200 to 43800)                | 0.6<br>(0.2 to 1)   |
| High SDI | Both   | 396000<br>(369000 to 416000) | 20.5<br>(19.2 to 21.4) | 42900<br>(28100 to 61500)            | 2.2<br>(1.5 to 3.2) | 277<br>(73 to 720)                       | 0 (0 to 0)          | 20200<br>(12000 to 30400)  | 1.1<br>(0.7 to 1.6) | 23900<br>(4840 to 46100)   | 1.2<br>(0.3 to 2.4) | 22400<br>(5960 to 33300)   | 1.2<br>(0.3 to 1.7) | 61900<br>(15100 to 132000)  | 3.1<br>(0.8 to 6.6)  | 12000<br>(87200 to 152000)        | 5.7<br>(4.1 to 7.3) | 20000<br>(4080 to 37600)                 | 1.1<br>(0.2 to 2.1) |
|          | Male   | 265000<br>(250000 to 277000) | 30.3<br>(28.6 to 31.7) | 27600<br>(18400 to 39400)            | 3.2<br>(2.1 to 4.5) | 152<br>(38 to 399)                       | 0 (0 to 0)          | 12300<br>(7270 to 18500)   | 1.4<br>(0.9 to 2.2) | 14500<br>(2890 to 27900)   | 1.7<br>(0.3 to 3.2) | 13600<br>(3670 to 20200)   | 1.6<br>(0.4 to 2.3) | 40000<br>(6940 to 89400)    | 4.5<br>(0.8 to 10.1) | 10400<br>(72800 to 10400)         | 11.5<br>(8 to 14.9) | 14000<br>(2740 to 26500)                 | 1.6<br>(0.3 to 3.1) |

|                        |        |                                         |                              |                                           |                            |                                 |                           |                                 |                           |                                |                           |                                |                           |                                      |                           |                                 |                           |                                 |                           |
|------------------------|--------|-----------------------------------------|------------------------------|-------------------------------------------|----------------------------|---------------------------------|---------------------------|---------------------------------|---------------------------|--------------------------------|---------------------------|--------------------------------|---------------------------|--------------------------------------|---------------------------|---------------------------------|---------------------------|---------------------------------|---------------------------|
|                        |        |                                         |                              |                                           |                            |                                 |                           |                                 |                           |                                |                           |                                |                           |                                      |                           | 13500<br>0)                     |                           |                                 |                           |
|                        | Female | 131000<br>(11900<br>0 to<br>140000<br>) | 12.5<br>(11.5<br>to<br>13.2) | 15300<br>(9750<br>to<br>22400)            | 1.4<br>(0.9<br>to<br>2.1)  | 125<br>(33 to<br>325)           | 0 (0<br>to 0)             | 7870<br>(4720<br>to<br>11800)   | 0.8<br>(0.5<br>to<br>1.2) | 9340<br>(1880<br>to<br>18200)  | 0.9<br>(0.2<br>to<br>1.7) | 8720<br>(2350<br>to<br>13100)  | 0.8<br>(0.2<br>to<br>1.2) | 21900<br>(4350<br>to<br>50200)       | 2 (0.4<br>to<br>4.6)      | 15200<br>(8810<br>to<br>21400)  | 1.2<br>(0.7<br>to<br>1.7) | 5940<br>(1060<br>to<br>11500)   | 0.6<br>(0.1<br>to<br>1.2) |
| High-<br>middle<br>SDI | Both   | 417000<br>(37500<br>0 to<br>460000<br>) | 20.2<br>(18.1<br>to<br>22.3) | 10900<br>0<br>(80200<br>to<br>14000<br>0) | 5.3<br>(3.9<br>to<br>6.8)  | 10900<br>(4300<br>to<br>22400)  | 0.5<br>(0.2<br>to<br>1.1) | 39400<br>(23900<br>to<br>58600) | 1.9<br>(1.2<br>to<br>2.9) | 28400<br>(5190<br>to<br>57200) | 1.4<br>(0.3<br>to<br>2.8) | 20000<br>(5700<br>to<br>30100) | 1 (0.3<br>to<br>1.5)      | 49600<br>(11200<br>to<br>11000<br>0) | 2.4<br>(0.5<br>to<br>5.3) | 47600<br>(32300<br>to<br>64500) | 2.3<br>(1.6<br>to<br>3.2) | 30500<br>(13400<br>to<br>50400) | 1.4<br>(0.6<br>to<br>2.4) |
|                        | Male   | 351000<br>(30900<br>0 to<br>392000<br>) | 38.5<br>(33.9<br>to<br>42.9) | 76800<br>(55300<br>to<br>10000<br>0)      | 8.5<br>(6.1<br>to 11)      | 6530<br>(2380<br>to<br>14000)   | 0.7<br>(0.3<br>to<br>1.5) | 23700<br>(13700<br>to<br>35800) | 2.6<br>(1.5<br>to<br>3.9) | 20400<br>(3690<br>to<br>41000) | 2.3<br>(0.4<br>to<br>4.5) | 14200<br>(3930<br>to<br>21800) | 1.6<br>(0.4<br>to<br>2.4) | 36300<br>(5940<br>to<br>83500)       | 4.1<br>(0.7<br>to<br>9.3) | 41700<br>(26700<br>to<br>58300) | 4.9<br>(3.2<br>to<br>6.9) | 22700<br>(9400<br>to<br>38100)  | 2.2<br>(0.9<br>to<br>3.8) |
|                        | Female | 66600<br>(58900<br>to<br>75300)         | 5.8<br>(5.1<br>to<br>6.5)    | 31800<br>(23000<br>to<br>41700)           | 2.8 (2<br>to<br>3.7)       | 4400<br>(1800<br>to<br>8560)    | 0.4<br>(0.2<br>to<br>0.8) | 15700<br>(9380<br>to<br>23800)  | 1.4<br>(0.8<br>to<br>2.1) | 7950<br>(1450<br>to<br>16200)  | 0.7<br>(0.1<br>to<br>1.4) | 5800<br>(1680<br>to<br>8840)   | 0.5<br>(0.1<br>to<br>0.8) | 13300<br>(2520<br>to<br>31700)       | 1.1<br>(0.2<br>to<br>2.7) | 5910<br>(3340<br>to<br>8430)    | 0.5<br>(0.3<br>to<br>0.7) | 7850<br>(3200<br>to<br>13400)   | 0.7<br>(0.3<br>to<br>1.2) |
|                        | Both   | 384000<br>(32600<br>0 to<br>444000<br>) | 16<br>(13.7<br>to<br>18.5)   | 12500<br>0<br>(90300<br>to<br>16300<br>0) | 5.2<br>(3.8<br>to<br>6.8)  | 34800<br>(17100<br>to<br>58900) | 1.5<br>(0.7<br>to<br>2.5) | 43000<br>(25300<br>to<br>65300) | 1.8<br>(1.1<br>to<br>2.7) | 21700<br>(3790<br>to<br>45100) | 0.9<br>(0.2<br>to<br>1.9) | 23800<br>(6630<br>to<br>36600) | 1 (0.3<br>to<br>1.5)      | 48900<br>(11200<br>to<br>11000<br>0) | 2.1<br>(0.5<br>to<br>4.7) | 21900<br>(14200<br>to<br>31700) | 1 (0.7<br>to<br>1.5)      | 35700<br>(17600<br>to<br>56700) | 1.3<br>(0.6<br>to<br>2.1) |
| Middle<br>SDI          | Male   | 339000<br>(28300<br>0 to<br>398000<br>) | 30.2<br>(25.3<br>to<br>35.3) | 88900<br>(61900<br>to<br>11800<br>0)      | 7.9<br>(5.5<br>to<br>10.4) | 21700<br>(9840<br>to<br>38600)  | 1.9<br>(0.9<br>to<br>3.4) | 23900<br>(13500<br>to<br>36900) | 2.1<br>(1.2<br>to<br>3.3) | 15000<br>(2680<br>to<br>30700) | 1.3<br>(0.2<br>to<br>2.7) | 16600<br>(4670<br>to<br>26300) | 1.5<br>(0.4<br>to<br>2.3) | 34300<br>(5570<br>to<br>80400)       | 3.2<br>(0.5<br>to<br>7.4) | 18100<br>(10600<br>to<br>28000) | 1.9<br>(1.1<br>to<br>2.9) | 26400<br>(12500<br>to<br>43100) | 2 (0.9<br>to<br>3.2)      |
|                        | Female | 45000<br>(37800<br>to<br>53300)         | 3.7<br>(3.1<br>to<br>4.4)    | 36600<br>(25800<br>to<br>48500)           | 2.9<br>(2.1<br>to<br>3.9)  | 13100<br>(6570<br>to<br>21900)  | 1 (0.5<br>to<br>1.7)      | 19100<br>(11100<br>to<br>29000) | 1.5<br>(0.9<br>to<br>2.3) | 6780<br>(1150<br>to<br>14100)  | 0.5<br>(0.1<br>to<br>1.1) | 7240<br>(2080<br>to<br>11100)  | 0.6<br>(0.2<br>to<br>0.9) | 14700<br>(2840<br>to<br>35300)       | 1.2<br>(0.2<br>to<br>2.9) | 3840<br>(2160<br>to<br>5720)    | 0.3<br>(0.2<br>to<br>0.5) | 9250<br>(4100<br>to<br>15300)   | 0.7<br>(0.3<br>to<br>1.1) |
|                        | Both   | 95000<br>(86000<br>to<br>105000<br>)    | 7.3<br>(6.6<br>to 8)         | 25800<br>(16900<br>to<br>35000)           | 2 (1.3<br>to<br>2.6)       | 22900<br>(14100<br>to<br>32600) | 1.7<br>(1.1<br>to<br>2.5) | 9320<br>(5330<br>to<br>14200)   | 0.7<br>(0.4<br>to<br>1.1) | 7530<br>(1500<br>to<br>15300)  | 0.6<br>(0.1<br>to<br>1.2) | 8540<br>(3130<br>to<br>12900)  | 0.6<br>(0.2<br>to 1)      | 14900<br>(3360<br>to<br>33500)       | 1.2<br>(0.3<br>to<br>2.6) | 7860<br>(5010<br>to<br>11300)   | 0.7<br>(0.4<br>to 1)      | 10700<br>(5270<br>to<br>16800)  | 0.7<br>(0.4<br>to 1.1)    |

|                |        |                           |                        |                           |                      |                          |                     |                        |                     |                         |                     |                        |                     |                          |                      |                        |                     |                         |                     |
|----------------|--------|---------------------------|------------------------|---------------------------|----------------------|--------------------------|---------------------|------------------------|---------------------|-------------------------|---------------------|------------------------|---------------------|--------------------------|----------------------|------------------------|---------------------|-------------------------|---------------------|
|                | Male   | 84000<br>(75500 to 93000) | 13.6<br>(12.2 to 15)   | 19100<br>(12500 to 25700) | 3 (2 to 4.1)         | 15000<br>(8630 to 22100) | 2.4<br>(1.4 to 3.5) | 5260<br>(2970 to 8130) | 0.8<br>(0.5 to 1.3) | 5280<br>(1080 to 10700) | 0.8<br>(0.2 to 1.7) | 5970<br>(2190 to 9120) | 0.9<br>(0.3 to 1.4) | 10700<br>(1860 to 24800) | 1.8<br>(0.3 to 4.1)  | 6590<br>(3830 to 9950) | 1.2<br>(0.7 to 1.8) | 8490<br>(4020 to 13500) | 1.2<br>(0.6 to 1.9) |
|                | Female | 11000<br>(9350 to 12800)  | 1.7<br>(1.4 to 2)      | 6730<br>(4280 to 9420)    | 1 (0.6 to 1.4)       | 7930<br>(5020 to 11200)  | 1.2<br>(0.7 to 1.6) | 4060<br>(2330 to 6080) | 0.6<br>(0.3 to 0.9) | 2250<br>(434 to 4520)   | 0.3<br>(0.1 to 0.7) | 2570<br>(903 to 3940)  | 0.4<br>(0.1 to 0.6) | 4250<br>(873 to 10200)   | 0.6<br>(0.1 to 1.5)  | 1270<br>(720 to 1920)  | 0.2<br>(0.1 to 0.3) | 2210<br>(993 to 3620)   | 0.3<br>(0.1 to 0.5) |
| Low SDI        | Both   | 18900<br>(15900 to 22400) | 4 (3.4 to 4.7)         | 4860<br>(2860 to 7310)    | 1 (0.6 to 1.5)       | 10800<br>(7120 to 15300) | 2.2<br>(1.5 to 3.1) | 1540<br>(840 to 2420)  | 0.3<br>(0.2 to 0.5) | 2180<br>(429 to 4470)   | 0.4<br>(0.1 to 0.9) | 2440<br>(864 to 3820)  | 0.5<br>(0.2 to 0.8) | 3620<br>(753 to 8310)    | 0.8<br>(0.2 to 1.8)  | 1620<br>(826 to 4090)  | 0.4<br>(0.2 to 1)   | 2690<br>(1260 to 4360)  | 0.5<br>(0.2 to 0.7) |
|                | Male   | 17100<br>(14200 to 20500) | 7.4<br>(6.2 to 8.8)    | 3890<br>(2220 to 5930)    | 1.6<br>(0.9 to 2.5)  | 7870<br>(4990 to 11500)  | 3.3<br>(2.1 to 4.8) | 1090<br>(580 to 1750)  | 0.5<br>(0.2 to 0.7) | 1640<br>(327 to 3390)   | 0.7<br>(0.1 to 1.4) | 1840<br>(646 to 2980)  | 0.8<br>(0.3 to 1.2) | 2820<br>(480 to 6920)    | 1.3<br>(0.2 to 3.1)  | 1350<br>(605 to 3800)  | 0.7<br>(0.3 to 1.9) | 2260<br>(1020 to 3730)  | 0.8<br>(0.4 to 1.3) |
|                | Female | 1850<br>(1550 to 2140)    | 0.8<br>(0.7 to 0.9)    | 970<br>(539 to 1490)      | 0.4<br>(0.2 to 0.6)  | 2900<br>(1990 to 4110)   | 1.2<br>(0.8 to 1.6) | 454<br>(244 to 716)    | 0.2<br>(0.1 to 0.3) | 538<br>(109 to 1100)    | 0.2 (0 to 0.4)      | 596<br>(205 to 913)    | 0.2<br>(0.1 to 0.4) | 800<br>(159 to 1900)     | 0.3<br>(0.1 to 0.8)  | 271<br>(115 to 432)    | 0.1<br>(0.1 to 0.2) | 426<br>(193 to 706)     | 0.1<br>(0.1 to 0.2) |
| Central Asia   | Both   | 8870<br>(7910 to 9910)    | 12<br>(10.8 to 13.3)   | 2230<br>(1530 to 3050)    | 3 (2.1 to 4.1)       | 381<br>(171 to 682)      | 0.5<br>(0.2 to 0.9) | 822<br>(495 to 1230)   | 1.1<br>(0.7 to 1.7) | 1030<br>(171 to 2410)   | 1.4<br>(0.2 to 3.3) | 560<br>(155 to 857)    | 0.8<br>(0.2 to 1.2) | 1130<br>(240 to 2520)    | 1.6<br>(0.4 to 3.6)  | 718<br>(445 to 1040)   | 1.1<br>(0.7 to 1.6) | 910<br>(451 to 1440)    | 1 (0.5 to 1.6)      |
|                | Male   | 8470<br>(7530 to 9470)    | 27.4<br>(24.5 to 30.3) | 1750<br>(1200 to 2410)    | 5.6<br>(3.8 to 7.6)  | 272<br>(116 to 515)      | 0.9<br>(0.4 to 1.7) | 560<br>(333 to 850)    | 1.8<br>(1.1 to 2.8) | 810<br>(135 to 1880)    | 2.6<br>(0.4 to 6)   | 435<br>(118 to 669)    | 1.4<br>(0.4 to 2.1) | 882<br>(144 to 2050)     | 3 (0.5 to 6.9)       | 635<br>(365 to 942)    | 2.5<br>(1.4 to 3.7) | 775<br>(368 to 1250)    | 1.9<br>(0.9 to 3.1) |
|                | Female | 400<br>(335 to 483)       | 1 (0.8 to 1.2)         | 478<br>(324 to 665)       | 1.2<br>(0.8 to 1.6)  | 109<br>(54 to 188)       | 0.3<br>(0.1 to 0.5) | 262<br>(160 to 380)    | 0.6<br>(0.4 to 0.9) | 219<br>(35 to 519)      | 0.6<br>(0.1 to 1.3) | 125<br>(35 to 192)     | 0.3<br>(0.1 to 0.5) | 248<br>(48 to 578)       | 0.6<br>(0.1 to 1.5)  | 82 (36 to 142)         | 0.2<br>(0.1 to 0.4) | 134<br>(63 to 219)      | 0.3<br>(0.1 to 0.5) |
| Central Europe | Both   | 60500<br>(52800 to 69000) | 28.3<br>(24.7 to 32.3) | 11300<br>(8120 to 14900)  | 5.3<br>(3.8 to 7)    | 1430<br>(466 to 3200)    | 0.7<br>(0.2 to 1.5) | 4650<br>(2730 to 7100) | 2.2<br>(1.3 to 3.4) | 4420<br>(788 to 8800)   | 2.1<br>(0.4 to 4.1) | 3230<br>(850 to 4940)  | 1.5<br>(0.4 to 2.3) | 8450<br>(1860 to 18500)  | 3.8<br>(0.8 to 8.4)  | 6780<br>(4150 to 9980) | 3 (1.8 to 4.4)      | 3350<br>(555 to 6500)   | 1.6<br>(0.3 to 3.2) |
|                | Male   | 46000<br>(39800 to 52800) | 49.1<br>(42.5 to 56.2) | 8100<br>(5810 to 10800)   | 8.7<br>(6.2 to 11.6) | 911<br>(279 to 2080)     | 1 (0.3 to 2.2)      | 3180<br>(1850 to 4950) | 3.4 (2 to 5.4)      | 3130<br>(565 to 6210)   | 3.4<br>(0.6 to 6.7) | 2270<br>(597 to 3500)  | 2.4<br>(0.6 to 3.8) | 6290<br>(1080 to 14300)  | 6.7<br>(1.1 to 15.2) | 6130<br>(3570 to 9320) | 6.4<br>(3.7 to 9.7) | 2610<br>(415 to 5060)   | 2.7<br>(0.4 to 5.3) |
|                | Female | 14400<br>(12400)          | 12.2<br>(10.5)         | 3180<br>(2260)            | 2.7<br>(1.9)         | 519<br>(178)             | 0.4<br>(0.2 to 1)   | 1470<br>(869)          | 1.3<br>(0.7)        | 1280<br>(231)           | 1.1<br>(0.2)        | 964<br>(268)           | 0.8<br>(0.2)        | 2170<br>(420)            | 1.7<br>(0.3 to 4)    | 652<br>(370)           | 0.5<br>(0.3)        | 746<br>(102)            | 0.7<br>(0.1)        |

|                                     |        |                                         |                              |                                |                           |                       |                      |                               |                           |                               |                           |                               |                           |                                |                           |                                 |                            |                               |                           |
|-------------------------------------|--------|-----------------------------------------|------------------------------|--------------------------------|---------------------------|-----------------------|----------------------|-------------------------------|---------------------------|-------------------------------|---------------------------|-------------------------------|---------------------------|--------------------------------|---------------------------|---------------------------------|----------------------------|-------------------------------|---------------------------|
|                                     |        | to<br>16600)                            | to<br>14.1)                  | to<br>4230)                    | to<br>3.6)                | to<br>1130)           |                      | to<br>2240)                   | to<br>1.9)                | to<br>2600)                   | to<br>2.2)                | to<br>1500)                   | to<br>1.3)                | to<br>5010)                    |                           | to<br>988)                      | to<br>0.8)                 | to<br>1520)                   | to<br>1.4)                |
| Eastern<br>Europe                   | Both   | 56600<br>(49300<br>to<br>64300)         | 16.2<br>(14.1<br>to<br>18.4) | 6560<br>(3780<br>to<br>9700)   | 1.9<br>(1.1<br>to<br>2.8) | 250<br>(73 to<br>614) | 0.1 (0<br>to<br>0.2) | 3460<br>(2040<br>to<br>5230)  | 1 (0.6<br>to<br>1.5)      | 5120<br>(933<br>to<br>10600)  | 1.5<br>(0.3<br>to<br>3.1) | 3640<br>(1080<br>to<br>5560)  | 1.1<br>(0.3<br>to<br>1.6) | 4050<br>(823<br>to<br>9490)    | 1.1<br>(0.2<br>to<br>2.7) | 4900<br>(3000<br>to<br>7200)    | 1.4<br>(0.8<br>to 2)       | 2410<br>(434<br>to<br>4590)   | 0.7<br>(0.1<br>to<br>1.3) |
|                                     | Male   | 52000<br>(44900<br>to<br>59600)         | 38.9<br>(33.5<br>to<br>44.5) | 5280<br>(3040<br>to<br>7960)   | 4 (2.3<br>to 6)           | 185<br>(53 to<br>449) | 0.1 (0<br>to<br>0.3) | 2300<br>(1310<br>to<br>3530)  | 1.7 (1<br>to<br>2.6)      | 4080<br>(732<br>to<br>8480)   | 3.1<br>(0.5<br>to<br>6.4) | 2910<br>(868<br>to<br>4470)   | 2.2<br>(0.7<br>to<br>3.4) | 3240<br>(533<br>to<br>7890)    | 2.5<br>(0.4<br>to 6)      | 4300<br>(2400<br>to<br>6560)    | 3.4<br>(1.9<br>to<br>5.1)  | 1980<br>(344<br>to<br>3790)   | 1.3<br>(0.2<br>to<br>2.6) |
|                                     | Female | 4630<br>(3860<br>to<br>5540)            | 2.2<br>(1.8<br>to<br>2.7)    | 1270<br>(748<br>to<br>1910)    | 0.6<br>(0.3<br>to<br>0.9) | 65 (19<br>to<br>161)  | 0 (0<br>to<br>0.1)   | 1160<br>(689<br>to<br>1780)   | 0.6<br>(0.3<br>to<br>0.9) | 1040<br>(202<br>to<br>2100)   | 0.5<br>(0.1<br>to 1)      | 734<br>(217<br>to<br>1150)    | 0.3<br>(0.1<br>to<br>0.5) | 808<br>(144<br>to<br>1950)     | 0.4<br>(0.1<br>to<br>0.9) | 592<br>(325<br>to<br>904)       | 0.3<br>(0.1<br>to<br>0.4)  | 432<br>(66 to<br>865)         | 0.2 (0<br>to<br>0.4)      |
| Australasia                         | Both   | 6850<br>(6220<br>to<br>7370)            | 13.6<br>(12.5<br>to<br>14.6) | 356<br>(86 to<br>693)          | 0.7<br>(0.2<br>to<br>1.4) | 3 (0 to<br>9)         | 0 (0<br>to 0)        | 347<br>(199<br>to<br>529)     | 0.7<br>(0.4<br>to<br>1.1) | 169<br>(26 to<br>463)         | 0.3<br>(0.1<br>to<br>0.9) | 491<br>(127<br>to<br>743)     | 1 (0.3<br>to<br>1.5)      | 980<br>(229<br>to<br>2160)     | 1.9<br>(0.4<br>to<br>4.1) | 3820<br>(2890<br>to<br>4690)    | 7.1<br>(5.4<br>to<br>8.8)  | 458<br>(82 to<br>880)         | 0.9<br>(0.2<br>to<br>1.8) |
|                                     | Male   | 4170<br>(3810<br>to<br>4520)            | 17.7<br>(16.1<br>to<br>19.1) | 210<br>(51 to<br>412)          | 0.9<br>(0.2<br>to<br>1.7) | 1 (0 to<br>4)         | 0 (0<br>to 0)        | 217<br>(123<br>to<br>334)     | 0.9<br>(0.5<br>to<br>1.5) | 97 (15<br>to<br>265)          | 0.4<br>(0.1<br>to<br>1.1) | 286<br>(72 to<br>432)         | 1.2<br>(0.3<br>to<br>1.8) | 627<br>(109<br>to<br>1470)     | 2.6<br>(0.4<br>to<br>6.1) | 3190<br>(2330<br>to<br>3990)    | 13<br>(9.5<br>to<br>16.3)  | 306<br>(52 to<br>593)         | 1.3<br>(0.2<br>to<br>2.5) |
|                                     | Female | 2670<br>(2370<br>to<br>2930)            | 10.1<br>(9 to<br>11)         | 146<br>(36 to<br>289)          | 0.5<br>(0.1<br>to<br>1.1) | 1 (0 to<br>5)         | 0 (0<br>to 0)        | 129<br>(74 to<br>200)         | 0.5<br>(0.3<br>to<br>0.8) | 72 (11<br>to<br>194)          | 0.3 (0<br>to<br>0.7)      | 205<br>(55 to<br>316)         | 0.8<br>(0.2<br>to<br>1.2) | 353<br>(68 to<br>847)          | 1.3<br>(0.2<br>to 3)      | 632<br>(367<br>to<br>918)       | 2.1<br>(1.3<br>to<br>3.1)  | 152<br>(24 to<br>300)         | 0.6<br>(0.1<br>to<br>1.2) |
| High-<br>income<br>Asia<br>Pacific  | Both   | 72500<br>(64100<br>to<br>78000)         | 14.7<br>(13.3<br>to<br>15.7) | 12600<br>(8280<br>to<br>17900) | 2.6<br>(1.7<br>to<br>3.6) | 21 (5<br>to 63)       | 0 (0<br>to 0)        | 3870<br>(2220<br>to<br>6020)  | 0.8<br>(0.5<br>to<br>1.3) | 2620<br>(441<br>to<br>5590)   | 0.5<br>(0.1<br>to<br>1.2) | 4710<br>(1340<br>to<br>7100)  | 0.9<br>(0.3<br>to<br>1.4) | 8880<br>(1880<br>to<br>20000)  | 1.7<br>(0.4<br>to<br>3.9) | 20100<br>(13200<br>to<br>27100) | 3.6<br>(2.3<br>to<br>4.8)  | 3650<br>(659<br>to<br>6960)   | 0.9<br>(0.2<br>to<br>1.7) |
|                                     | Male   | 60100<br>(54100<br>to<br>64100)         | 28.2<br>(25.5<br>to 30)      | 8740<br>(5880<br>to<br>12400)  | 4.1<br>(2.8<br>to<br>5.9) | 13 (3<br>to 37)       | 0 (0<br>to 0)        | 2330<br>(1330<br>to<br>3670)  | 1.1<br>(0.7<br>to<br>1.8) | 1830<br>(306<br>to<br>3930)   | 0.9<br>(0.1<br>to<br>1.9) | 3250<br>(938<br>to<br>4890)   | 1.5<br>(0.4<br>to<br>2.3) | 6680<br>(1100<br>to<br>15600)  | 3.1<br>(0.5<br>to<br>7.2) | 18400<br>(11700<br>to<br>25300) | 8.1<br>(5.2<br>to<br>11.2) | 2900<br>(505<br>to<br>5560)   | 1.5<br>(0.3<br>to<br>2.8) |
|                                     | Female | 12400<br>(10000<br>to<br>14400)         | 4.3<br>(3.6<br>to<br>4.9)    | 3830<br>(2460<br>to<br>5570)   | 1.3<br>(0.9<br>to<br>1.9) | 9 (2 to<br>26)        | 0 (0<br>to 0)        | 1530<br>(879<br>to<br>2320)   | 0.6<br>(0.3<br>to<br>0.9) | 789<br>(135<br>to<br>1710)    | 0.3 (0<br>to<br>0.6)      | 1460<br>(424<br>to<br>2250)   | 0.5<br>(0.1<br>to<br>0.7) | 2200<br>(400<br>to<br>5300)    | 0.7<br>(0.1<br>to<br>1.7) | 1680<br>(721<br>to<br>2700)     | 0.4<br>(0.2<br>to<br>0.7)  | 743<br>(115<br>to<br>1480)    | 0.3<br>(0.1<br>to<br>0.7) |
| High-<br>income<br>North<br>America | Both   | 164000<br>(15300<br>0 to<br>172000<br>) | 25.5<br>(23.9<br>to<br>26.8) | 9060<br>(4330<br>to<br>15200)  | 1.4<br>(0.7<br>to<br>2.4) | 28 (5<br>to 88)       | 0 (0<br>to 0)        | 7510<br>(4480<br>to<br>11100) | 1.2<br>(0.7<br>to<br>1.8) | 9760<br>(1940<br>to<br>18800) | 1.5<br>(0.3<br>to<br>2.9) | 8460<br>(2140<br>to<br>12600) | 1.3<br>(0.3<br>to 2)      | 29600<br>(7340<br>to<br>61700) | 4.5<br>(1.1<br>to<br>9.5) | 41200<br>(29700<br>to<br>53200) | 6.2<br>(4.4<br>to<br>7.9)  | 7030<br>(1190<br>to<br>13700) | 1.1<br>(0.2<br>to<br>2.2) |

|                        |        |                              |                        |                           |                     |                     |                     |                         |                     |                          |                     |                         |                     |                          |                      |                           |                        |                         |                     |
|------------------------|--------|------------------------------|------------------------|---------------------------|---------------------|---------------------|---------------------|-------------------------|---------------------|--------------------------|---------------------|-------------------------|---------------------|--------------------------|----------------------|---------------------------|------------------------|-------------------------|---------------------|
|                        | Male   | 94500<br>(89800 to 98500)    | 32.4<br>(30.8 to 33.9) | 4990<br>(2390 to 8320)    | 1.7<br>(0.8 to 2.9) | 12 (2 to 38)        | 0 (0 to 0)          | 4500<br>(2690 to 6680)  | 1.6<br>(0.9 to 2.3) | 5360<br>(1070 to 10300)  | 1.9<br>(0.4 to 3.6) | 4590<br>(1210 to 6910)  | 1.6<br>(0.4 to 2.4) | 18000<br>(3240 to 38800) | 6.1<br>(1.1 to 13.2) | 35300<br>(24300 to 46700) | 12.1<br>(8.4 to 16.1)  | 4310<br>(665 to 8450)   | 1.4<br>(0.2 to 2.8) |
|                        | Female | 69300<br>(63100 to 74600)    | 19.8<br>(18.2 to 21.2) | 4070<br>(1940 to 6840)    | 1.2<br>(0.6 to 1.9) | 15 (3 to 48)        | 0 (0 to 0)          | 3010<br>(1790 to 4530)  | 0.9<br>(0.5 to 1.4) | 4400<br>(868 to 8470)    | 1.3<br>(0.2 to 2.4) | 3870<br>(1010 to 5910)  | 1.1<br>(0.3 to 1.7) | 11700<br>(2390 to 26500) | 3.2<br>(0.7 to 7.4)  | 5880<br>(3460 to 8620)    | 1.6<br>(0.9 to 2.3)    | 2720<br>(398 to 5400)   | 0.8<br>(0.1 to 1.6) |
| Southern Latin America | Both   | 12700<br>(11900 to 13500)    | 15.2<br>(14.2 to 16.1) | 2010<br>(1310 to 2880)    | 2.4<br>(1.6 to 3.4) | 109<br>(37 to 251)  | 0.1 (0 to 0.3)      | 1040<br>(602 to 1620)   | 1.2<br>(0.7 to 1.9) | 559<br>(71 to 1560)      | 0.7<br>(0.1 to 1.9) | 499<br>(125 to 749)     | 0.6<br>(0.1 to 0.9) | 1890<br>(441 to 4080)    | 2.2<br>(0.5 to 4.8)  | 2050<br>(1290 to 2940)    | 2.4<br>(1.5 to 3.4)    | 1280<br>(644 to 2010)   | 1.5<br>(0.8 to 2.4) |
|                        | Male   | 9010<br>(8440 to 9600)       | 24.4<br>(22.8 to 25.9) | 1320<br>(846 to 1890)     | 3.6<br>(2.3 to 5.2) | 61 (20 to 142)      | 0.2<br>(0.1 to 0.4) | 694<br>(402 to 1090)    | 1.9<br>(1.1 to 3)   | 371<br>(48 to 1040)      | 1 (0.1 to 2.8)      | 315<br>(78 to 484)      | 0.9<br>(0.2 to 1.3) | 1290<br>(221 to 2950)    | 3.5<br>(0.6 to 8)    | 1770<br>(1050 to 2610)    | 4.9<br>(2.9 to 7.2)    | 1030<br>(493 to 1660)   | 2.7<br>(1.3 to 4.3) |
|                        | Female | 3690<br>(3360 to 4030)       | 7.9<br>(7.2 to 8.6)    | 693<br>(455 to 984)       | 1.5 (1 to 2.1)      | 49 (18 to 106)      | 0.1 (0 to 0.2)      | 349<br>(201 to 537)     | 0.7<br>(0.4 to 1.2) | 188<br>(25 to 515)       | 0.4<br>(0.1 to 1.1) | 184<br>(47 to 279)      | 0.4<br>(0.1 to 0.6) | 601<br>(116 to 1370)     | 1.2<br>(0.2 to 2.8)  | 282<br>(151 to 432)       | 0.6<br>(0.3 to 0.9)    | 249<br>(118 to 405)     | 0.6<br>(0.3 to 0.9) |
| Western Europe         | Both   | 184000<br>(173000 to 193000) | 20.5<br>(19.4 to 21.4) | 20200<br>(13200 to 29400) | 2.2<br>(1.5 to 3.3) | 74 (19 to 187)      | 0 (0 to 0)          | 9360<br>(5520 to 14100) | 1.1<br>(0.7 to 1.7) | 14800<br>(2950 to 29300) | 1.6<br>(0.3 to 3.3) | 8750<br>(2310 to 13000) | 1 (0.3 to 1.5)      | 27500<br>(6520 to 58900) | 2.9<br>(0.7 to 6.2)  | 71000<br>(52400 to 89500) | 7.1<br>(5.2 to 9)      | 9270<br>(1650 to 17700) | 1.1<br>(0.2 to 2.2) |
|                        | Male   | 130000<br>(123000 to 136000) | 31.7<br>(30.1 to 33.1) | 13700<br>(8900 to 19800)  | 3.3<br>(2.2 to 4.8) | 48 (13 to 124)      | 0 (0 to 0)          | 6450<br>(3810 to 9680)  | 1.7 (1 to 2.5)      | 9970<br>(1950 to 19600)  | 2.4<br>(0.5 to 4.8) | 5610<br>(1460 to 8360)  | 1.4<br>(0.4 to 2)   | 18900<br>(3280 to 42600) | 4.5<br>(0.8 to 10.1) | 62700<br>(44200 to 80400) | 14.4<br>(10.1 to 18.6) | 7060<br>(1200 to 13500) | 1.8<br>(0.3 to 3.5) |
|                        | Female | 53900<br>(49000 to 57100)    | 11.2<br>(10.4 to 11.8) | 6580<br>(4290 to 9510)    | 1.4<br>(0.9 to 2)   | 26 (7 to 66)        | 0 (0 to 0)          | 2910<br>(1710 to 4400)  | 0.7<br>(0.4 to 1)   | 4870<br>(959 to 9560)    | 1 (0.2 to 2)        | 3140<br>(858 to 4670)   | 0.6<br>(0.2 to 1)   | 8530<br>(1680 to 19600)  | 1.6<br>(0.3 to 3.7)  | 8340<br>(4840 to 11800)   | 1.4<br>(0.8 to 2)      | 2210<br>(340 to 4340)   | 0.5<br>(0.1 to 1)   |
| Andean Latin America   | Both   | 1630<br>(1270 to 2020)       | 3 (2.4 to 3.7)         | 976<br>(620 to 1430)      | 1.8<br>(1.1 to 2.6) | 276<br>(130 to 471) | 0.5<br>(0.2 to 0.9) | 97 (43 to 171)          | 0.2<br>(0.1 to 0.3) | 253<br>(28 to 683)       | 0.5<br>(0.1 to 1.2) | 198<br>(52 to 320)      | 0.4<br>(0.1 to 0.6) | 516<br>(120 to 1170)     | 1 (0.2 to 2.2)       | 370<br>(206 to 585)       | 0.7<br>(0.4 to 1.1)    | 442<br>(217 to 724)     | 0.8<br>(0.4 to 1.2) |
|                        | Male   | 1340<br>(1040 to 1660)       | 5.2<br>(4.1 to 6.4)    | 552<br>(348 to 810)       | 2.1<br>(1.3 to 3.1) | 131<br>(57 to 236)  | 0.5<br>(0.2 to 0.9) | 54 (23 to 96)           | 0.2<br>(0.1 to 0.4) | 141<br>(15 to 381)       | 0.5<br>(0.1 to 1.5) | 107<br>(28 to 174)      | 0.4<br>(0.1 to 0.7) | 293<br>(49 to 701)       | 1.2<br>(0.2 to 2.7)  | 277<br>(143 to 468)       | 1.1<br>(0.6 to 1.9)    | 293<br>(133 to 495)     | 1 (0.5 to 1.8)      |

|                              |        |                                 |                              |                              |                           |                            |                           |                              |                           |                             |                           |                            |                           |                             |                           |                              |                           |                              |                           |
|------------------------------|--------|---------------------------------|------------------------------|------------------------------|---------------------------|----------------------------|---------------------------|------------------------------|---------------------------|-----------------------------|---------------------------|----------------------------|---------------------------|-----------------------------|---------------------------|------------------------------|---------------------------|------------------------------|---------------------------|
|                              | Female | 295<br>(225 to<br>388)          | 1 (0.8<br>to<br>1.4)         | 423<br>(268<br>to<br>626)    | 1.5<br>(0.9<br>to<br>2.2) | 145<br>(72 to<br>253)      | 0.5<br>(0.2<br>to<br>0.9) | 43 (19<br>to 78)             | 0.1<br>(0.1<br>to<br>0.3) | 113<br>(13 to<br>305)       | 0.4 (0<br>to<br>1.1)      | 91 (24<br>to<br>146)       | 0.3<br>(0.1<br>to<br>0.5) | 223<br>(45 to<br>537)       | 0.8<br>(0.2<br>to<br>1.9) | 93 (47<br>to<br>162)         | 0.3<br>(0.2<br>to<br>0.6) | 149<br>(69 to<br>255)        | 0.5<br>(0.2<br>to<br>0.8) |
| Caribbean                    | Both   | 6920<br>(5850<br>to<br>8060)    | 13.3<br>(11.3<br>to<br>15.6) | 1210<br>(617<br>to<br>2000)  | 2.3<br>(1.2<br>to<br>3.9) | 313<br>(180<br>to<br>506)  | 0.6<br>(0.3<br>to<br>1)   | 457<br>(256<br>to<br>705)    | 0.9<br>(0.5<br>to<br>1.4) | 208<br>(34 to<br>528)       | 0.4<br>(0.1<br>to<br>1)   | 295<br>(78 to<br>461)      | 0.6<br>(0.2<br>to<br>0.9) | 1320<br>(305<br>to<br>2860) | 2.6<br>(0.6<br>to<br>5.5) | 414<br>(237<br>to<br>637)    | 0.8<br>(0.5<br>to<br>1.2) | 620<br>(302<br>to<br>993)    | 1.2<br>(0.6<br>to<br>1.9) |
|                              | Male   | 5030<br>(4250<br>to<br>5900)    | 21<br>(17.7<br>to<br>24.6)   | 792<br>(405<br>to<br>1310)   | 3.3<br>(1.7<br>to<br>5.4) | 205<br>(108<br>to<br>368)  | 0.8<br>(0.4<br>to<br>1.5) | 293<br>(165<br>to<br>461)    | 1.2<br>(0.7<br>to<br>1.9) | 136<br>(22 to<br>341)       | 0.6<br>(0.1<br>to<br>1.4) | 188<br>(48 to<br>299)      | 0.8<br>(0.2<br>to<br>1.2) | 909<br>(165<br>to<br>2040)  | 3.8<br>(0.7<br>to<br>8.5) | 365<br>(196<br>to<br>577)    | 1.6<br>(0.8<br>to<br>2.5) | 449<br>(204<br>to<br>740)    | 1.8<br>(0.8<br>to<br>2.9) |
|                              | Female | 1880<br>(1560<br>to<br>2240)    | 6.8<br>(5.6<br>to<br>8.1)    | 418<br>(209<br>to<br>703)    | 1.5<br>(0.8<br>to<br>2.5) | 108<br>(66 to<br>163)      | 0.4<br>(0.2<br>to<br>0.6) | 165<br>(94 to<br>256)        | 0.6<br>(0.3<br>to<br>0.9) | 71 (11<br>to<br>184)        | 0.3 (0<br>to<br>0.7)      | 107<br>(27 to<br>166)      | 0.4<br>(0.1<br>to<br>0.6) | 411<br>(82 to<br>964)       | 1.5<br>(0.3<br>to<br>3.5) | 49 (27<br>to 79)             | 0.2<br>(0.1<br>to<br>0.3) | 171<br>(78 to<br>285)        | 0.6<br>(0.3<br>to<br>1)   |
| Central<br>Latin<br>America  | Both   | 11400<br>(9520<br>to<br>13500)  | 5 (4.2<br>to<br>5.9)         | 3580<br>(2450<br>to<br>4870) | 1.6<br>(1.1<br>to<br>2.1) | 982<br>(559<br>to<br>1510) | 0.4<br>(0.2<br>to<br>0.7) | 746<br>(361<br>to<br>1250)   | 0.3<br>(0.2<br>to<br>0.5) | 1410<br>(221<br>to<br>3130) | 0.6<br>(0.1<br>to<br>1.4) | 857<br>(228<br>to<br>1330) | 0.4<br>(0.1<br>to<br>0.6) | 3470<br>(845<br>to<br>7490) | 1.5<br>(0.4<br>to<br>3.3) | 1400<br>(881<br>to<br>2050)  | 0.6<br>(0.4<br>to<br>0.9) | 1840<br>(911<br>to<br>2920)  | 0.7<br>(0.4<br>to<br>1.2) |
|                              | Male   | 8600<br>(7210<br>to<br>10100)   | 8.3<br>(6.9<br>to<br>9.7)    | 2200<br>(1500<br>to<br>2990) | 2.1<br>(1.4<br>to<br>2.8) | 491<br>(261<br>to<br>805)  | 0.5<br>(0.2<br>to<br>0.8) | 445<br>(212<br>to<br>749)    | 0.4<br>(0.2<br>to<br>0.7) | 845<br>(137<br>to<br>1890)  | 0.8<br>(0.1<br>to<br>1.8) | 501<br>(131<br>to<br>780)  | 0.5<br>(0.1<br>to<br>0.7) | 2190<br>(387<br>to<br>4930) | 2.1<br>(0.4<br>to<br>4.8) | 1160<br>(649<br>to<br>1770)  | 1.1<br>(0.6<br>to<br>1.7) | 1350<br>(629<br>to<br>2200)  | 1.2<br>(0.5<br>to<br>1.9) |
|                              | Female | 2760<br>(2210<br>to<br>3400)    | 2.2<br>(1.8<br>to<br>2.7)    | 1390<br>(931<br>to<br>1950)  | 1.1<br>(0.7<br>to<br>1.5) | 491<br>(280<br>to<br>754)  | 0.4<br>(0.2<br>to<br>0.6) | 301<br>(148<br>to<br>511)    | 0.2<br>(0.1<br>to<br>0.4) | 563<br>(83 to<br>1250)      | 0.4<br>(0.1<br>to<br>1)   | 356<br>(95 to<br>560)      | 0.3<br>(0.1<br>to<br>0.4) | 1280<br>(263<br>to<br>2950) | 1 (0.2<br>to<br>2.4)      | 242<br>(135<br>to<br>372)    | 0.2<br>(0.1<br>to<br>0.3) | 487<br>(227<br>to<br>807)    | 0.4<br>(0.2<br>to<br>0.6) |
| Tropical<br>Latin<br>America | Both   | 22600<br>(20900<br>to<br>24200) | 9.4<br>(8.7<br>to<br>10.1)   | 2910<br>(1870<br>to<br>4100) | 1.2<br>(0.8<br>to<br>1.7) | 843<br>(363<br>to<br>1550) | 0.4<br>(0.2<br>to<br>0.6) | 1810<br>(1060<br>to<br>2730) | 0.7<br>(0.4<br>to<br>1.1) | 1560<br>(273<br>to<br>3410) | 0.7<br>(0.1<br>to<br>1.4) | 915<br>(249<br>to<br>1400) | 0.4<br>(0.1<br>to<br>0.6) | 3410<br>(799<br>to<br>7360) | 1.4<br>(0.3<br>to<br>3.1) | 3030<br>(2040<br>to<br>4060) | 1.3<br>(0.9<br>to<br>1.8) | 2170<br>(1120<br>to<br>3340) | 0.8<br>(0.4<br>to<br>1.3) |
|                              | Male   | 14700<br>(13600<br>to<br>15700) | 14<br>(12.9<br>to<br>15)     | 1730<br>(1110<br>to<br>2460) | 1.6 (1<br>to<br>2.3)      | 443<br>(181<br>to<br>831)  | 0.4<br>(0.2<br>to<br>0.8) | 1040<br>(594<br>to<br>1600)  | 1 (0.6<br>to<br>1.5)      | 918<br>(160<br>to<br>1980)  | 0.9<br>(0.2<br>to<br>1.9) | 520<br>(140<br>to<br>814)  | 0.5<br>(0.1<br>to<br>0.8) | 2100<br>(346<br>to<br>4800) | 2 (0.3<br>to<br>4.6)      | 2160<br>(1310<br>to<br>3130) | 2.2<br>(1.4<br>to<br>3.2) | 1540<br>(740<br>to<br>2440)  | 1.3<br>(0.6<br>to<br>2.1) |
|                              | Female | 7890<br>(7130<br>to<br>8600)    | 5.9<br>(5.3<br>to<br>6.5)    | 1180<br>(745<br>to<br>1670)  | 0.9<br>(0.6<br>to<br>1.3) | 399<br>(178<br>to<br>718)  | 0.3<br>(0.1<br>to<br>0.5) | 768<br>(452<br>to<br>1170)   | 0.6<br>(0.3<br>to<br>0.9) | 646<br>(112<br>to<br>1400)  | 0.5<br>(0.1<br>to<br>1.1) | 395<br>(102<br>to<br>615)  | 0.3<br>(0.1<br>to<br>0.5) | 1310<br>(250<br>to<br>3050) | 1 (0.2<br>to<br>2.3)      | 868<br>(526<br>to<br>1270)   | 0.7<br>(0.4<br>to<br>1)   | 634<br>(301<br>to<br>1020)   | 0.5<br>(0.2<br>to<br>0.7) |
| North<br>Africa and          | Both   | 47800<br>(41900                 | 11.6<br>(10.2                | 14800<br>(10900              | 3.6<br>(2.6               | 791<br>(438                | 0.2<br>(0.1               | 4840<br>(2920                | 1.2<br>(0.7               | 2690<br>(439                | 0.7<br>(0.1               | 1240<br>(375               | 0.3<br>(0.1               | 7460<br>(1600               | 1.9<br>(0.4               | 6040<br>(3420                | 1.6<br>(0.9               | 4160<br>(1990                | 0.9<br>(0.4               |

|             |        |                           |                     |                           |                    |                        |                  |                        |                  |                       |                  |                       |                  |                         |                   |                        |                  |                        |                  |
|-------------|--------|---------------------------|---------------------|---------------------------|--------------------|------------------------|------------------|------------------------|------------------|-----------------------|------------------|-----------------------|------------------|-------------------------|-------------------|------------------------|------------------|------------------------|------------------|
| Middle East |        | to 54500)                 | to 13.2)            | to 19200)                 | to 4.6)            | to 1340)               | to 0.3)          | to 7370)               | to 1.8)          | to 5450)              | to 1.3)          | to 1860)              | to 0.4)          | to 16400)               | to 4.2)           | to 9510)               | to 2.5)          | to 6710)               | to 1.4)          |
|             | Male   | 44000 (38600 to 50300)    | 21.1 (18.6 to 24)   | 11600 (8440 to 15100)     | 5.5 (4 to 7.1)     | 581 (303 to 1080)      | 0.3 (0.1 to 0.5) | 3470 (2080 to 5350)    | 1.7 (1 to 2.5)   | 2130 (346 to 4340)    | 1 (0.2 to 2.1)   | 929 (277 to 1400)     | 0.4 (0.1 to 0.7) | 5900 (975 to 13600)     | 3 (0.5 to 6.9)    | 5590 (2980 to 9030)    | 3 (1.6 to 4.6)   | 3920 (1850 to 6360)    | 1.6 (0.7 to 2.5) |
|             | Female | 3730 (3110 to 4410)       | 1.9 (1.6 to 2.2)    | 3220 (2350 to 4160)       | 1.6 (1.2 to 2.1)   | 210 (128 to 316)       | 0.1 (0.1 to 0.1) | 1370 (811 to 2040)     | 0.7 (0.4 to 1)   | 554 (91 to 1140)      | 0.3 (0 to 0.6)   | 306 (93 to 472)       | 0.1 (0 to 0.2)   | 1560 (323 to 3710)      | 0.8 (0.2 to 1.9)  | 451 (242 to 747)       | 0.3 (0.1 to 0.4) | 238 (107 to 399)       | 0.1 (0 to 0.2)   |
| South Asia  | Both   | 58400 (48500 to 68500)    | 4.4 (3.6 to 5.1)    | 24100 (16600 to 32200)    | 1.8 (1.2 to 2.4)   | 13900 (8320 to 20400)  | 1 (0.6 to 1.5)   | 5640 (3070 to 8850)    | 0.4 (0.2 to 0.7) | 5300 (1070 to 11200)  | 0.4 (0.1 to 0.8) | 7580 (2740 to 11600)  | 0.6 (0.2 to 0.8) | 11400 (2480 to 25600)   | 0.9 (0.2 to 1.9)  | 5810 (3470 to 9040)    | 0.5 (0.3 to 0.7) | 8090 (3840 to 12900)   | 0.5 (0.2 to 0.8) |
|             | Male   | 53400 (43900 to 63300)    | 8.2 (6.7 to 9.7)    | 18100 (12100 to 24500)    | 2.7 (1.8 to 3.7)   | 9570 (5390 to 14500)   | 1.4 (0.8 to 2.2) | 3560 (1860 to 5750)    | 0.5 (0.3 to 0.9) | 3860 (740 to 8120)    | 0.6 (0.1 to 1.2) | 5480 (1940 to 8620)   | 0.8 (0.3 to 1.3) | 8540 (1490 to 20100)    | 1.3 (0.2 to 3.1)  | 5150 (2870 to 8220)    | 0.9 (0.5 to 1.4) | 7220 (3360 to 11700)   | 0.9 (0.4 to 1.5) |
|             | Female | 4970 (3890 to 6210)       | 0.8 (0.6 to 0.9)    | 6080 (4070 to 8300)       | 0.9 (0.6 to 1.2)   | 4320 (2600 to 6370)    | 0.6 (0.4 to 0.9) | 2080 (1120 to 3270)    | 0.3 (0.2 to 0.5) | 1450 (297 to 3020)    | 0.2 (0 to 0.4)   | 2100 (804 to 3310)    | 0.3 (0.1 to 0.5) | 2850 (572 to 6910)      | 0.4 (0.1 to 1)    | 658 (338 to 1160)      | 0.1 (0.1 to 0.2) | 876 (375 to 1480)      | 0.1 (0 to 0.2)   |
| East Asia   | Both   | 504000 (411000 to 605000) | 24.6 (20.2 to 29.4) | 175000 (125000 to 232000) | 8.6 (6.1 to 11.3)  | 39100 (18700 to 68400) | 1.9 (0.9 to 3.3) | 60600 (36400 to 90200) | 3 (1.8 to 4.5)   | 29100 (5300 to 61700) | 1.4 (0.3 to 3.1) | 27900 (7310 to 44000) | 1.4 (0.4 to 2.2) | 54700 (12200 to 124000) | 2.7 (0.6 to 6.2)  | 24000 (15000 to 36000) | 1.3 (0.8 to 1.9) | 42800 (20400 to 70000) | 1.9 (0.9 to 3)   |
|             | Male   | 441000 (350000 to 544000) | 47.1 (37.8 to 57.5) | 122000 (83600 to 168000)  | 13.1 (9.1 to 17.8) | 24000 (10700 to 44900) | 2.5 (1.1 to 4.7) | 32800 (18800 to 51300) | 3.5 (2 to 5.5)   | 19900 (3670 to 42500) | 2.1 (0.4 to 4.5) | 19400 (5080 to 32200) | 2.1 (0.5 to 3.5) | 38300 (6370 to 93700)   | 4.2 (0.7 to 10.2) | 18700 (10200 to 30700) | 2.5 (1.4 to 4)   | 29800 (13500 to 50100) | 2.6 (1.2 to 4.4) |
|             | Female | 62500 (50100 to 77800)    | 5.9 (4.8 to 7.4)    | 52200 (36700 to 70400)    | 4.9 (3.4 to 6.6)   | 15000 (7290 to 26000)  | 1.4 (0.7 to 2.4) | 27800 (16500 to 42200) | 2.6 (1.5 to 3.9) | 9220 (1570 to 19100)  | 0.9 (0.1 to 1.8) | 8470 (2270 to 13300)  | 0.8 (0.2 to 1.3) | 16400 (3040 to 40300)   | 1.5 (0.3 to 3.8)  | 5250 (2730 to 8090)    | 0.5 (0.3 to 0.8) | 13000 (5620 to 21900)  | 1.1 (0.5 to 1.9) |
| Oceania     | Both   | 766 (567 to 1100)         | 12.1 (9.2 to 17)    | 56 (18 to 134)            | 0.9 (0.3 to 2.1)   | 357 (222 to 572)       | 5.4 (3.5 to 8.5) | 80 (40 to 141)         | 1.2 (0.6 to 2.2) | 48 (5 to 149)         | 0.7 (0.1 to 2.3) | 71 (22 to 124)        | 1.1 (0.3 to 1.9) | 190 (39 to 442)         | 3.1 (0.7 to 7.1)  | 84 (43 to 150)         | 1.5 (0.8 to 2.7) | 61 (28 to 108)         | 0.7 (0.3 to 1.3) |



|                                      |        |                                 |                              |                                 |                           |                                |                            |                               |                           |                             |                           |                              |                           |                                |                            |                              |                           |                               |                           |
|--------------------------------------|--------|---------------------------------|------------------------------|---------------------------------|---------------------------|--------------------------------|----------------------------|-------------------------------|---------------------------|-----------------------------|---------------------------|------------------------------|---------------------------|--------------------------------|----------------------------|------------------------------|---------------------------|-------------------------------|---------------------------|
|                                      | Male   | 657<br>(474 to<br>969)          | 20.5<br>(15.4<br>to<br>29.3) | 46 (14<br>to<br>111)            | 1.4<br>(0.4<br>to<br>3.3) | 283<br>(170<br>to<br>466)      | 8.5<br>(5.1<br>to<br>13.8) | 58 (28<br>to<br>106)          | 1.8<br>(0.9<br>to<br>3.3) | 38 (4<br>to<br>122)         | 1.2<br>(0.1<br>to<br>3.6) | 56 (17<br>to<br>101)         | 1.7<br>(0.5<br>to 3)      | 153<br>(27 to<br>375)          | 4.9<br>(0.9<br>to<br>11.6) | 80 (40<br>to<br>146)         | 3 (1.7<br>to<br>5.3)      | 46 (19<br>to 85)              | 1 (0.4<br>to<br>1.9)      |
|                                      | Female | 109<br>(78 to<br>153)           | 3.6<br>(2.6<br>to 5)         | 10 (4<br>to 24)                 | 0.3<br>(0.1<br>to<br>0.8) | 75 (46<br>to<br>119)           | 2.3<br>(1.4<br>to<br>3.7)  | 22 (11<br>to 39)              | 0.7<br>(0.3<br>to<br>1.2) | 10 (1<br>to 30)             | 0.3 (0<br>to<br>0.9)      | 15 (5<br>to 27)              | 0.5<br>(0.1<br>to<br>0.8) | 38 (8<br>to 93)                | 1.3<br>(0.3<br>to<br>3.1)  | 3 (1 to<br>6)                | 0.1 (0<br>to<br>0.2)      | 15 (6<br>to 27)               | 0.4<br>(0.2<br>to<br>0.7) |
| Southeast<br>Asia                    | Both   | 76400<br>(64900<br>to<br>88400) | 13.2<br>(11.3<br>to<br>15.3) | 16200<br>(11100<br>to<br>22300) | 2.8<br>(1.9<br>to<br>3.8) | 12000<br>(6930<br>to<br>18300) | 2 (1.1<br>to<br>3.1)       | 6980<br>(3820<br>to<br>11000) | 1.2<br>(0.7<br>to<br>1.9) | 2630<br>(477<br>to<br>6010) | 0.4<br>(0.1<br>to 1)      | 5570<br>(1690<br>to<br>8680) | 0.9<br>(0.3<br>to<br>1.5) | 10800<br>(2430<br>to<br>24400) | 2 (0.5<br>to<br>4.5)       | 4270<br>(2500<br>to<br>6590) | 0.8<br>(0.5<br>to<br>1.3) | 9060<br>(4500<br>to<br>14400) | 1.3<br>(0.6<br>to<br>2.1) |
|                                      | Male   | 68600<br>(58000<br>to<br>79300) | 26.5<br>(22.6<br>to<br>30.5) | 11400<br>(7840<br>to<br>15500)  | 4.4 (3<br>to<br>5.9)      | 7620<br>(4120<br>to<br>12100)  | 2.8<br>(1.6<br>to<br>4.5)  | 3560<br>(1950<br>to<br>5710)  | 1.4<br>(0.8<br>to<br>2.2) | 1810<br>(326<br>to<br>4030) | 0.7<br>(0.1<br>to<br>1.5) | 3800<br>(1140<br>to<br>5900) | 1.4<br>(0.4<br>to<br>2.2) | 7420<br>(1250<br>to<br>17900)  | 3.1<br>(0.5<br>to<br>7.4)  | 3960<br>(2160<br>to<br>6220) | 1.9 (1<br>to<br>2.9)      | 6840<br>(3210<br>to<br>11200) | 2.1 (1<br>to<br>3.4)      |
|                                      | Female | 7860<br>(6040<br>to<br>9990)    | 2.7<br>(2.1<br>to<br>3.3)    | 4810<br>(3100<br>to<br>7090)    | 1.5 (1<br>to<br>2.3)      | 4360<br>(2450<br>to<br>6830)   | 1.4<br>(0.8<br>to<br>2.1)  | 3420<br>(1770<br>to<br>5640)  | 1.1<br>(0.5<br>to<br>1.7) | 824<br>(149<br>to<br>2000)  | 0.3 (0<br>to<br>0.6)      | 1770<br>(545<br>to<br>2970)  | 0.6<br>(0.2<br>to<br>0.9) | 3400<br>(678<br>to<br>8400)    | 1.1<br>(0.2<br>to<br>2.8)  | 311<br>(173<br>to<br>534)    | 0.1<br>(0.1<br>to<br>0.2) | 2220<br>(976<br>to<br>3790)   | 0.6<br>(0.3<br>to 1)      |
| Central<br>Sub-<br>Saharan<br>Africa | Both   | 2270<br>(1450<br>to<br>4070)    | 4.5<br>(2.9<br>to<br>7.9)    | 583<br>(269<br>to<br>1180)      | 1.1<br>(0.5<br>to<br>2.3) | 1600<br>(813<br>to<br>3130)    | 3.1<br>(1.6<br>to<br>5.9)  | 112<br>(50 to<br>212)         | 0.2<br>(0.1<br>to<br>0.4) | 262<br>(31 to<br>839)       | 0.5<br>(0.1<br>to<br>1.6) | 343<br>(93 to<br>741)        | 0.7<br>(0.2<br>to<br>1.4) | 565<br>(102<br>to<br>1630)     | 1.2<br>(0.2<br>to<br>3.5)  | 246<br>(72 to<br>929)        | 0.6<br>(0.2<br>to<br>2.3) | 374<br>(145<br>to<br>791)     | 0.6<br>(0.2<br>to<br>1.2) |
|                                      | Male   | 2160<br>(1350<br>to<br>3950)    | 10<br>(6.4<br>to<br>17.8)    | 463<br>(200<br>to<br>990)       | 2.1<br>(0.9<br>to<br>4.4) | 1200<br>(548<br>to<br>2680)    | 5.3<br>(2.4<br>to<br>11.6) | 79 (33<br>to<br>163)          | 0.3<br>(0.1<br>to<br>0.6) | 200<br>(22 to<br>697)       | 0.9<br>(0.1<br>to<br>3.1) | 261<br>(68 to<br>635)        | 1.2<br>(0.3<br>to<br>2.8) | 460<br>(67 to<br>1450)         | 2.3<br>(0.4<br>to<br>7.3)  | 190<br>(44 to<br>844)        | 1.2<br>(0.3<br>to<br>5.4) | 294<br>(103<br>to<br>675)     | 0.9<br>(0.3<br>to<br>2.2) |
|                                      | Female | 118<br>(83 to<br>168)           | 0.4<br>(0.3<br>to<br>0.6)    | 120<br>(59 to<br>213)           | 0.4<br>(0.2<br>to<br>0.8) | 405<br>(252<br>to<br>644)      | 1.5<br>(0.9<br>to<br>2.4)  | 34 (16<br>to 58)              | 0.1<br>(0.1<br>to<br>0.2) | 62 (8<br>to<br>191)         | 0.2 (0<br>to<br>0.7)      | 82 (24<br>to<br>139)         | 0.3<br>(0.1<br>to<br>0.5) | 105<br>(19 to<br>257)          | 0.4<br>(0.1<br>to 1)       | 56 (14<br>to<br>117)         | 0.2<br>(0.1<br>to<br>0.5) | 80 (34<br>to<br>147)          | 0.2<br>(0.1<br>to<br>0.4) |
| Eastern<br>sub-<br>Saharan<br>Africa | Both   | 3810<br>(3080<br>to<br>4830)    | 2.7<br>(2.2<br>to<br>3.3)    | 638<br>(316<br>to<br>1070)      | 0.4<br>(0.2<br>to<br>0.7) | 3280<br>(2240<br>to<br>4750)   | 2.2<br>(1.5<br>to<br>3.1)  | 218<br>(103<br>to<br>387)     | 0.1<br>(0.1<br>to<br>0.2) | 450<br>(81 to<br>1030)      | 0.3<br>(0.1<br>to<br>0.7) | 536<br>(192<br>to<br>878)    | 0.4<br>(0.1<br>to<br>0.6) | 664<br>(137<br>to<br>1520)     | 0.5<br>(0.1<br>to<br>1.1)  | 517<br>(167<br>to<br>2130)   | 0.4<br>(0.1<br>to<br>1.7) | 708<br>(341<br>to<br>1180)    | 0.4<br>(0.2<br>to<br>0.6) |
|                                      | Male   | 3450<br>(2780<br>to<br>4410)    | 5.2<br>(4.2<br>to<br>6.5)    | 494<br>(234<br>to<br>839)       | 0.7<br>(0.3<br>to<br>1.2) | 2330<br>(1550<br>to<br>3380)   | 3.4<br>(2.3<br>to<br>4.9)  | 140<br>(64 to<br>250)         | 0.2<br>(0.1<br>to<br>0.3) | 326<br>(59 to<br>778)       | 0.5<br>(0.1<br>to<br>1.1) | 393<br>(141<br>to<br>659)    | 0.6<br>(0.2<br>to<br>0.9) | 514<br>(82 to<br>1240)         | 0.8<br>(0.1<br>to 2)       | 403<br>(103<br>to<br>2000)   | 0.7<br>(0.2<br>to<br>3.4) | 529<br>(241<br>to<br>904)     | 0.6<br>(0.3<br>to 1)      |
|                                      | Female | 358<br>(279 to<br>447)          | 0.5<br>(0.4                  | 144<br>(72 to<br>246)           | 0.2<br>(0.1               | 954<br>(665                    | 1.2<br>(0.8                | 78 (38<br>to<br>129)          | 0.1 (0<br>to<br>0.1)      | 124<br>(23 to<br>275)       | 0.2 (0<br>to<br>0.3)      | 144<br>(50 to<br>231)        | 0.2<br>(0.1               | 149<br>(27 to<br>361)          | 0.2 (0<br>to<br>0.5)       | 114<br>(31 to<br>204)        | 0.2 (0<br>to<br>0.3)      | 179<br>(81 to<br>298)         | 0.2<br>(0.1               |

|                                       |        |                              |                              |                              |                           |                              |                           |                           |                           |                            |                           |                            |                           |                             |                           |                              |                            |                            |                           |
|---------------------------------------|--------|------------------------------|------------------------------|------------------------------|---------------------------|------------------------------|---------------------------|---------------------------|---------------------------|----------------------------|---------------------------|----------------------------|---------------------------|-----------------------------|---------------------------|------------------------------|----------------------------|----------------------------|---------------------------|
|                                       |        |                              | to<br>0.6)                   |                              | to<br>0.3)                | to<br>1350)                  | to<br>1.7)                |                           |                           |                            |                           |                            | to<br>0.3)                |                             |                           |                              |                            |                            | to<br>0.3)                |
| Southern<br>sub-<br>Saharan<br>Africa | Both   | 5630<br>(5030<br>to<br>6390) | 10.4<br>(9.3<br>to<br>11.7)  | 1590<br>(1120<br>to<br>2190) | 2.9<br>(2.1<br>to 4)      | 497<br>(299<br>to<br>742)    | 0.9<br>(0.5<br>to<br>1.3) | 387<br>(204<br>to<br>621) | 0.7<br>(0.4<br>to<br>1.1) | 477<br>(81 to<br>1110)     | 0.9<br>(0.1<br>to<br>2.1) | 608<br>(211<br>to<br>936)  | 1.1<br>(0.4<br>to<br>1.7) | 979<br>(237<br>to<br>2110)  | 1.9<br>(0.5<br>to 4)      | 1680<br>(1170<br>to<br>2260) | 3.4<br>(2.3<br>to<br>4.5)  | 228<br>(111<br>to<br>370)  | 0.4<br>(0.2<br>to<br>0.6) |
|                                       | Male   | 4400<br>(3880<br>to<br>5050) | 19.7<br>(17.6<br>to<br>22.4) | 1080<br>(748<br>to<br>1510)  | 4.8<br>(3.3<br>to<br>6.7) | 295<br>(169<br>to<br>463)    | 1.3<br>(0.7<br>to 2)      | 223<br>(117<br>to<br>366) | 1 (0.5<br>to<br>1.6)      | 318<br>(53 to<br>759)      | 1.4<br>(0.2<br>to<br>3.3) | 404<br>(140<br>to<br>639)  | 1.8<br>(0.6<br>to<br>2.8) | 613<br>(105<br>to<br>1400)  | 2.9<br>(0.5<br>to<br>6.7) | 1460<br>(961<br>to<br>2000)  | 7.6<br>(5.1<br>to<br>10.3) | 175<br>(80 to<br>289)      | 0.6<br>(0.3<br>to 1)      |
|                                       | Female | 1230<br>(1050<br>to<br>1410) | 4 (3.4<br>to<br>4.6)         | 506<br>(347<br>to<br>689)    | 1.6<br>(1.1<br>to<br>2.2) | 202<br>(124<br>to<br>291)    | 0.6<br>(0.4<br>to<br>0.9) | 164<br>(87 to<br>261)     | 0.5<br>(0.3<br>to<br>0.8) | 159<br>(29 to<br>376)      | 0.5<br>(0.1<br>to<br>1.2) | 204<br>(72 to<br>310)      | 0.7<br>(0.2<br>to<br>1)   | 366<br>(75 to<br>832)       | 1.2<br>(0.2<br>to<br>2.7) | 221<br>(103<br>to<br>324)    | 0.8<br>(0.4<br>to<br>1.1)  | 54 (24<br>to 89)           | 0.2<br>(0.1<br>to<br>0.3) |
| Western<br>sub-<br>Saharan<br>Africa  | Both   | 4830<br>(3920<br>to<br>5860) | 2.9<br>(2.4<br>to<br>3.5)    | 2130<br>(1210<br>to<br>3160) | 1.3<br>(0.7<br>to<br>1.9) | 3590<br>(2330<br>to<br>5130) | 2.1<br>(1.4<br>to 3)      | 466<br>(247<br>to<br>741) | 0.3<br>(0.1<br>to<br>0.4) | 766<br>(146<br>to<br>1570) | 0.5<br>(0.1<br>to<br>0.9) | 775<br>(254<br>to<br>1220) | 0.5<br>(0.2<br>to<br>0.7) | 1100<br>(233<br>to<br>2540) | 0.7<br>(0.2<br>to<br>1.6) | 351<br>(183<br>to<br>713)    | 0.2<br>(0.1<br>to<br>0.5)  | 645<br>(310<br>to<br>1060) | 0.3<br>(0.1<br>to<br>0.5) |
|                                       | Male   | 4520<br>(3650<br>to<br>5530) | 5.6<br>(4.6<br>to<br>6.8)    | 1570<br>(855<br>to<br>2340)  | 2 (1.1<br>to<br>2.9)      | 2560<br>(1620<br>to<br>3830) | 3.2 (2<br>to<br>4.7)      | 326<br>(173<br>to<br>520) | 0.4<br>(0.2<br>to<br>0.6) | 551<br>(103<br>to<br>1130) | 0.7<br>(0.1<br>to<br>1.4) | 558<br>(184<br>to<br>874)  | 0.7<br>(0.2<br>to<br>1.1) | 815<br>(129<br>to<br>2000)  | 1.1<br>(0.2<br>to<br>2.7) | 301<br>(145<br>to<br>657)    | 0.4<br>(0.2<br>to<br>0.9)  | 484<br>(219<br>to<br>812)  | 0.5<br>(0.2<br>to<br>0.8) |
|                                       | Female | 306<br>(239 to<br>391)       | 0.4<br>(0.3<br>to<br>0.5)    | 561<br>(318<br>to<br>850)    | 0.6<br>(0.4<br>to 1)      | 1020<br>(683<br>to<br>1470)  | 1.1<br>(0.8<br>to<br>1.6) | 139<br>(73 to<br>221)     | 0.1<br>(0.1<br>to<br>0.2) | 215<br>(41 to<br>442)      | 0.2 (0<br>to<br>0.5)      | 216<br>(73 to<br>344)      | 0.2<br>(0.1<br>to<br>0.4) | 289<br>(53 to<br>692)       | 0.4<br>(0.1<br>to<br>0.9) | 50 (22<br>to 84)             | 0.1 (0<br>to<br>0.1)       | 160<br>(73 to<br>271)      | 0.1<br>(0.1<br>to<br>0.2) |
| Afghanista<br>n                       | Both   | 651<br>(372 to<br>1120)      | 5.8<br>(3.5<br>to<br>9.7)    | 130<br>(45 to<br>290)        | 1.1<br>(0.4<br>to<br>2.4) | 358<br>(178<br>to<br>628)    | 3 (1.6<br>to<br>5.3)      | 93 (43<br>to<br>173)      | 0.8<br>(0.4<br>to<br>1.5) | 76 (6<br>to<br>272)        | 0.6<br>(0.1<br>to<br>2.3) | 79 (24<br>to<br>154)       | 0.7<br>(0.2<br>to<br>1.3) | 158<br>(31 to<br>419)       | 1.5<br>(0.3<br>to<br>3.9) | 22 (5<br>to 98)              | 0.2<br>(0.1<br>to 1)       | 99 (32<br>to<br>220)       | 0.6<br>(0.2<br>to<br>1.4) |
|                                       | Male   | 616<br>(347 to<br>1080)      | 11.7<br>(6.9<br>to 20)       | 105<br>(34 to<br>244)        | 1.9<br>(0.7<br>to<br>4.4) | 263<br>(123<br>to<br>507)    | 4.8<br>(2.3<br>to<br>9.1) | 65 (28<br>to<br>136)      | 1.2<br>(0.6<br>to<br>2.6) | 58 (4<br>to<br>209)        | 1 (0.1<br>to<br>3.9)      | 60 (17<br>to<br>125)       | 1.1<br>(0.3<br>to<br>2.2) | 119<br>(18 to<br>337)       | 2.5<br>(0.4<br>to<br>6.8) | 19 (3<br>to 92)              | 0.4<br>(0.1<br>to<br>2.1)  | 92 (29<br>to<br>209)       | 1.3<br>(0.4<br>to<br>2.8) |
|                                       | Female | 36 (22<br>to 55)             | 0.6<br>(0.4<br>to<br>0.9)    | 25 (9<br>to 52)              | 0.4<br>(0.1<br>to<br>0.7) | 94 (53<br>to<br>151)         | 1.4<br>(0.9<br>to<br>2.2) | 27 (13<br>to 47)          | 0.4<br>(0.2<br>to<br>0.6) | 18 (1<br>to 65)            | 0.3 (0<br>to 1)           | 19 (6<br>to 34)            | 0.3<br>(0.1<br>to<br>0.5) | 39 (8<br>to 97)             | 0.7<br>(0.1<br>to<br>1.6) | 4 (1 to<br>11)               | 0.1 (0<br>to<br>0.2)       | 7 (2 to<br>15)             | 0.1 (0<br>to<br>0.2)      |
| Albania                               | Both   | 872<br>(642 to<br>1170)      | 19.8<br>(14.5<br>to<br>26.6) | 140<br>(88 to<br>207)        | 3.2 (2<br>to<br>4.8)      | 60 (23<br>to<br>124)         | 1.4<br>(0.5<br>to<br>2.8) | 88 (48<br>to<br>144)      | 2 (1.1<br>to<br>3.3)      | 129<br>(20 to<br>289)      | 3 (0.5<br>to<br>6.7)      | 14 (4<br>to 26)            | 0.3<br>(0.1<br>to<br>0.6) | 74 (14<br>to<br>186)        | 1.7<br>(0.3<br>to<br>4.2) | 34 (12<br>to 94)             | 0.7<br>(0.3<br>to<br>2.1)  | 37 (6<br>to 77)            | 0.8<br>(0.1<br>to<br>1.7) |

|                |        |                        |                        |                      |                     |               |                     |                     |                     |                    |                     |                |                     |                    |                      |               |                        |                    |                     |
|----------------|--------|------------------------|------------------------|----------------------|---------------------|---------------|---------------------|---------------------|---------------------|--------------------|---------------------|----------------|---------------------|--------------------|----------------------|---------------|------------------------|--------------------|---------------------|
|                | Male   | 782<br>(565 to 1060)   | 37.7<br>(27.4 to 50.5) | 113<br>(71 to 170)   | 5.5<br>(3.5 to 8.2) | 44 (15 to 94) | 2.1<br>(0.8 to 4.5) | 64 (35 to 106)      | 3.1<br>(1.7 to 5.1) | 103<br>(16 to 230) | 5 (0.8 to 11.2)     | 11 (3 to 21)   | 0.6<br>(0.1 to 1)   | 61 (10 to 160)     | 2.9<br>(0.5 to 7.6)  | 27 (9 to 88)  | 1.3<br>(0.4 to 4.1)    | 32 (6 to 67)       | 1.5<br>(0.3 to 3.1) |
|                | Female | 91 (67 to 122)         | 3.9<br>(2.9 to 5.2)    | 27 (16 to 39)        | 1.2<br>(0.7 to 1.7) | 16 (6 to 29)  | 0.7<br>(0.3 to 1.3) | 24 (14 to 38)       | 1.1<br>(0.6 to 1.7) | 26 (4 to 57)       | 1.2<br>(0.2 to 2.5) | 4 (1 to 6)     | 0.2 (0 to 0.3)      | 13 (2 to 34)       | 0.6<br>(0.1 to 1.4)  | 6 (2 to 13)   | 0.3<br>(0.1 to 0.6)    | 5 (1 to 11)        | 0.2 (0 to 0.5)      |
| Algeria        | Both   | 2080<br>(1570 to 2750) | 6.7<br>(5.2 to 8.9)    | 679<br>(421 to 1010) | 2.2<br>(1.3 to 3.1) | 2 (1 to 4)    | 0 (0 to 0)          | 281<br>(160 to 446) | 0.9<br>(0.5 to 1.4) | 109<br>(10 to 369) | 0.3 (0 to 1.2)      | 87 (19 to 148) | 0.3<br>(0.1 to 0.5) | 398<br>(89 to 890) | 1.3<br>(0.3 to 3)    | 24 (5 to 102) | 0.1 (0 to 0.4)         | 155<br>(66 to 280) | 0.4<br>(0.2 to 0.7) |
|                | Male   | 1990<br>(1490 to 2650) | 12.4<br>(9.4 to 16.4)  | 534<br>(321 to 806)  | 3.3 (2 to 4.9)      | 1 (0 to 3)    | 0 (0 to 0)          | 198<br>(108 to 320) | 1.2<br>(0.7 to 2)   | 85 (8 to 298)      | 0.5 (0 to 1.8)      | 67 (14 to 119) | 0.4<br>(0.1 to 0.7) | 313<br>(59 to 735) | 2 (0.4 to 4.7)       | 20 (2 to 96)  | 0.2 (0 to 0.7)         | 148<br>(62 to 269) | 0.8<br>(0.3 to 1.4) |
|                | Female | 86 (61 to 119)         | 0.6<br>(0.4 to 0.9)    | 145<br>(93 to 213)   | 0.9<br>(0.6 to 1.4) | 1 (0 to 1)    | 0 (0 to 0)          | 82 (48 to 124)      | 0.5<br>(0.3 to 0.8) | 23 (2 to 77)       | 0.2 (0 to 0.5)      | 20 (5 to 33)   | 0.1 (0 to 0.2)      | 85 (17 to 194)     | 0.6<br>(0.1 to 1.3)  | 4 (2 to 9)    | 0 (0 to 0.1)           | 7 (3 to 13)        | 0 (0 to 0.1)        |
| American Samoa | Both   | 8 (6 to 9)             | 16.7<br>(14.2 to 19.2) | 0 (0 to 1)           | 1 (0.4 to 2.1)      | 0 (0 to 1)    | 0.7<br>(0.2 to 1.8) | 1 (0 to 1)          | 1.7 (1 to 2.7)      | 0 (0 to 1)         | 0.8<br>(0.1 to 3)   | 0 (0 to 1)     | 1.1<br>(0.3 to 1.7) | 3 (1 to 5)         | 5.9<br>(1.6 to 11.7) | 1 (1 to 1)    | 2.3<br>(1.4 to 3.4)    | 1 (0 to 1)         | 1 (0.5 to 1.7)      |
|                | Male   | 6 (5 to 7)             | 27.8<br>(23.9 to 32)   | 0 (0 to 1)           | 1.5<br>(0.5 to 3.2) | 0 (0 to 1)    | 0.9<br>(0.2 to 2.4) | 1 (0 to 1)          | 2.4<br>(1.3 to 3.8) | 0 (0 to 1)         | 1.1<br>(0.1 to 4.5) | 0 (0 to 1)     | 1.6<br>(0.4 to 2.5) | 2 (0 to 4)         | 8.7<br>(1.8 to 18.1) | 1 (1 to 1)    | 4.6<br>(2.8 to 7)      | 0 (0 to 1)         | 1.5<br>(0.6 to 2.5) |
|                | Female | 2 (1 to 2)             | 6.9<br>(5.3 to 9)      | 0 (0 to 0)           | 0.6<br>(0.2 to 1.3) | 0 (0 to 0)    | 0.6<br>(0.1 to 1.3) | 0 (0 to 0)          | 1.1<br>(0.6 to 1.8) | 0 (0 to 0)         | 0.5 (0 to 1.8)      | 0 (0 to 0)     | 0.7<br>(0.2 to 1.1) | 1 (0 to 2)         | 3.5<br>(0.8 to 7.6)  | 0 (0 to 0)    | 0.3<br>(0.2 to 0.6)    | 0 (0 to 0)         | 0.6<br>(0.3 to 1.2) |
| Andorra        | Both   | 34 (26 to 43)          | 24.2<br>(18.4 to 30.7) | 3 (1 to 4)           | 1.9<br>(0.9 to 3.1) | 0 (0 to 0)    | 0 (0 to 0)          | 2 (1 to 3)          | 1.5<br>(0.8 to 2.3) | 3 (0 to 10)        | 1.9<br>(0.2 to 6.8) | 1 (0 to 2)     | 0.9<br>(0.2 to 1.6) | 4 (1 to 9)         | 2.9<br>(0.6 to 6.6)  | 16 (10 to 23) | 11.4<br>(7 to 16.4)    | 2 (0 to 4)         | 1.4<br>(0.2 to 2.9) |
|                | Male   | 29 (22 to 36)          | 40.8<br>(31.3 to 50.8) | 2 (1 to 4)           | 3 (1.5 to 5)        | 0 (0 to 0)    | 0 (0 to 0)          | 2 (1 to 3)          | 2.3<br>(1.3 to 3.6) | 2 (0 to 8)         | 3.1<br>(0.3 to 11)  | 1 (0 to 2)     | 1.5<br>(0.4 to 2.5) | 3 (1 to 8)         | 4.8<br>(0.8 to 11.3) | 15 (9 to 22)  | 22.3<br>(13.8 to 32.1) | 2 (0 to 4)         | 2.4<br>(0.4 to 4.9) |
|                | Female | 5 (4 to 8)             | 7.7<br>(5.3 to 10.1)   | 1 (0 to 1)           | 0.7<br>(0.3 to 1)   | 0 (0 to 0)    | 0 (0 to 0)          | 0 (0 to 1)          | 0.6<br>(0.3 to 1)   | 1 (0 to 2)         | 0.8<br>(0.1 to 1.5) | 0 (0 to 0)     | 0.4<br>(0.1 to 0.7) | 1 (0 to 2)         | 0.9<br>(0.2 to 1.6)  | 1 (0 to 1)    | 0.9<br>(0.3 to 1.5)    | 0 (0 to 1)         | 0.4 (0 to 0.8)      |

|                           |        |                            |                           |                          |                        |                        |                        |                         |                        |                        |                        |                       |                        |                          |                        |                          |                        |                         |                        |
|---------------------------|--------|----------------------------|---------------------------|--------------------------|------------------------|------------------------|------------------------|-------------------------|------------------------|------------------------|------------------------|-----------------------|------------------------|--------------------------|------------------------|--------------------------|------------------------|-------------------------|------------------------|
|                           |        |                            | to<br>10.9)               |                          | to<br>1.3)             |                        |                        |                         |                        |                        | to<br>2.7)             |                       | to<br>0.7)             |                          | to<br>2.4)             |                          | to<br>1.9)             |                         |                        |
| Angola                    | Both   | 708<br>(547 to<br>919)     | 6.8<br>(5.5 to<br>8.6)    | 169<br>(79 to<br>295)    | 1.6<br>(0.8 to<br>2.8) | 226<br>(131 to<br>344) | 2.1<br>(1.3 to<br>3.2) | 46 (23<br>to 78)        | 0.4<br>(0.2 to<br>0.7) | 67 (4<br>to<br>256)    | 0.6 (0<br>to<br>2.4)   | 69 (18<br>to<br>116)  | 0.7<br>(0.2 to<br>1.1) | 128<br>(26 to<br>298)    | 1.3<br>(0.3 to<br>3.1) | 57 (20<br>to<br>229)     | 0.7<br>(0.3 to<br>2.7) | 96 (42<br>to<br>172)    | 0.7<br>(0.3 to<br>1.2) |
|                           | Male   | 658<br>(509 to<br>856)     | 14.5<br>(11.7 to<br>18.2) | 135<br>(62 to<br>235)    | 2.9<br>(1.3 to<br>4.9) | 163<br>(92 to<br>256)  | 3.5 (2<br>to<br>5.4)   | 30 (15<br>to<br>52)     | 0.6<br>(0.3 to<br>1)   | 51 (3<br>to<br>194)    | 1.1<br>(0.1 to<br>4.1) | 52 (14<br>to<br>87)   | 1.1<br>(0.3 to<br>1.8) | 105<br>(16 to<br>252)    | 2.5<br>(0.4 to<br>5.8) | 45 (12<br>to<br>220)     | 1.3<br>(0.4 to<br>6)   | 74 (31<br>to<br>135)    | 1.1<br>(0.5 to<br>2.1) |
|                           | Female | 49 (32<br>to 72)           | 0.9<br>(0.6 to<br>1.3)    | 34 (15<br>to 62)         | 0.6<br>(0.3 to<br>1.1) | 63 (39<br>to 96)       | 1.1<br>(0.7 to<br>1.7) | 16 (8<br>to 26)         | 0.2<br>(0.1 to<br>0.4) | 16 (1<br>to 62)        | 0.3 (0<br>to<br>1.1)   | 17 (5<br>to 30)       | 0.3<br>(0.1 to<br>0.5) | 23 (4<br>to 58)          | 0.4<br>(0.1 to<br>1.1) | 12 (3<br>to 24)          | 0.3<br>(0.1 to<br>0.6) | 22 (9<br>to 42)         | 0.3<br>(0.1 to<br>0.5) |
| Antigua<br>and<br>Barbuda | Both   | 4 (3 to<br>5)              | 4.2<br>(3.5 to<br>5.1)    | 1 (0 to<br>2)            | 1.2<br>(0.4 to<br>2.2) | 0 (0 to<br>0)          | 0 (0 to<br>0)          | 0 (0 to<br>0)           | 0.3<br>(0.2 to<br>0.5) | 0 (0 to<br>1)          | 0.3 (0<br>to<br>0.9)   | 0 (0 to<br>0)         | 0.3<br>(0.1 to<br>0.4) | 1 (0 to<br>3)            | 1.3<br>(0.3 to<br>2.8) | 0 (0 to<br>0)            | 0.2<br>(0.1 to<br>0.4) | 1 (0 to<br>1)           | 0.6<br>(0.3 to<br>1)   |
|                           | Male   | 3 (3 to<br>4)              | 7 (5.8 to<br>8.4)         | 1 (0 to<br>1)            | 1.6<br>(0.6 to<br>3)   | 0 (0 to<br>0)          | 0 (0 to<br>0.1)        | 0 (0 to<br>0)           | 0.4<br>(0.2 to<br>0.7) | 0 (0 to<br>1)          | 0.3 (0<br>to<br>1.3)   | 0 (0 to<br>0)         | 0.4<br>(0.1 to<br>0.6) | 1 (0 to<br>2)            | 1.8<br>(0.3 to<br>4.2) | 0 (0 to<br>0)            | 0.5<br>(0.3 to<br>0.8) | 0 (0 to<br>1)           | 0.9<br>(0.4 to<br>1.5) |
|                           | Female | 1 (1 to<br>1)              | 1.8<br>(1.4 to<br>2.4)    | 0 (0 to<br>1)            | 0.8<br>(0.3 to<br>1.5) | 0 (0 to<br>0)          | 0 (0 to<br>0)          | 0 (0 to<br>0)           | 0.2<br>(0.1 to<br>0.3) | 0 (0 to<br>0)          | 0.2 (0<br>to<br>0.7)   | 0 (0 to<br>0)         | 0.2 (0<br>to<br>0.3)   | 0 (0 to<br>1)            | 0.9<br>(0.2 to<br>2)   | 0 (0 to<br>0)            | 0.1 (0<br>to<br>0.1)   | 0 (0 to<br>0)           | 0.3<br>(0.1 to<br>0.5) |
| Argentina                 | Both   | 9370<br>(8700 to<br>10000) | 17.3<br>(16.1 to<br>18.6) | 1280<br>(755 to<br>1940) | 2.4<br>(1.4 to<br>3.6) | 68 (22<br>to<br>167)   | 0.1 (0<br>to<br>0.3)   | 724<br>(421 to<br>1130) | 1.3<br>(0.8 to<br>2.1) | 377<br>(30 to<br>1350) | 0.7<br>(0.1 to<br>2.5) | 278<br>(64 to<br>431) | 0.5<br>(0.1 to<br>0.8) | 1300<br>(298 to<br>2820) | 2.4<br>(0.5 to<br>5.1) | 1550<br>(963 to<br>2240) | 2.8<br>(1.7 to<br>4)   | 941<br>(467 to<br>1500) | 1.8<br>(0.9 to<br>2.8) |
|                           | Male   | 6710<br>(6200 to<br>7230)  | 28.2<br>(26.1 to<br>30.4) | 878<br>(514 to<br>1320)  | 3.7<br>(2.2 to<br>5.6) | 40 (12<br>to 99)       | 0.2<br>(0.1 to<br>0.4) | 489<br>(282 to<br>775)  | 2.1<br>(1.2 to<br>3.3) | 257<br>(20 to<br>909)  | 1.1<br>(0.1 to<br>3.9) | 179<br>(39 to<br>292) | 0.8<br>(0.2 to<br>1.3) | 917<br>(155 to<br>2120)  | 3.9<br>(0.7 to<br>9)   | 1330<br>(780 to<br>1970) | 5.8<br>(3.4 to<br>8.5) | 776<br>(368 to<br>1270) | 3.1<br>(1.5 to<br>5.1) |
|                           | Female | 2650<br>(2380 to<br>2950)  | 8.8<br>(7.9 to<br>9.7)    | 407<br>(239 to<br>616)   | 1.3<br>(0.8 to<br>2)   | 28 (9<br>to 68)        | 0.1 (0<br>to<br>0.2)   | 235<br>(138 to<br>363)  | 0.8<br>(0.5 to<br>1.2) | 120<br>(10 to<br>411)  | 0.4 (0<br>to<br>1.4)   | 100<br>(21 to<br>158) | 0.3<br>(0.1 to<br>0.5) | 383<br>(73 to<br>887)    | 1.2<br>(0.2 to<br>2.8) | 219<br>(109 to<br>338)   | 0.7<br>(0.3 to<br>1)   | 165<br>(75 to<br>277)   | 0.6<br>(0.3 to<br>1)   |
| Armenia                   | Both   | 960<br>(803 to<br>1140)    | 22.5<br>(18.9 to<br>26.6) | 272<br>(176 to<br>383)   | 6.4<br>(4.2 to<br>9.1) | 6 (2 to<br>15)         | 0.1 (0<br>to<br>0.4)   | 90 (53<br>to<br>136)    | 2.1<br>(1.3 to<br>3.3) | 142<br>(17 to<br>404)  | 3.4<br>(0.4 to<br>9.6) | 29 (7<br>to 49)       | 0.7<br>(0.2 to<br>1.2) | 116<br>(23 to<br>270)    | 2.7<br>(0.5 to<br>6.3) | 148<br>(86 to<br>223)    | 3.5<br>(2.1 to<br>5.3) | 66 (31<br>to<br>109)    | 1.5<br>(0.7 to<br>2.4) |

|            |        |                        |                        |                     |                      |               |                     |                     |                     |                    |                      |                     |                     |                      |                      |                        |                       |                    |                     |
|------------|--------|------------------------|------------------------|---------------------|----------------------|---------------|---------------------|---------------------|---------------------|--------------------|----------------------|---------------------|---------------------|----------------------|----------------------|------------------------|-----------------------|--------------------|---------------------|
|            | Male   | 932<br>(779 to 1110)   | 51.7<br>(43.5 to 61)   | 222<br>(144 to 313) | 12.4<br>(8 to 17.4)  | 5 (1 to 11)   | 0.3<br>(0.1 to 0.6) | 63 (37 to 98)       | 3.5 (2 to 5.4)      | 116<br>(14 to 331) | 6.5<br>(0.8 to 18.3) | 23 (5 to 40)        | 1.3<br>(0.3 to 2.2) | 94 (15 to 224)       | 5.2<br>(0.8 to 12.5) | 124<br>(69 to 194)     | 7.3<br>(4.1 to 11.2)  | 59 (27 to 100)     | 3 (1.3 to 5)        |
|            | Female | 28 (21 to 38)          | 1.1<br>(0.9 to 1.5)    | 49 (31 to 68)       | 2.1<br>(1.3 to 2.9)  | 2 (1 to 4)    | 0.1 (0 to 0.2)      | 26 (16 to 39)       | 1.1<br>(0.7 to 1.7) | 26 (3 to 73)       | 1.1<br>(0.1 to 3.1)  | 6 (1 to 9)          | 0.2<br>(0.1 to 0.4) | 22 (4 to 52)         | 0.9<br>(0.2 to 2.1)  | 24 (9 to 44)           | 0.9<br>(0.4 to 1.8)   | 7 (3 to 11)        | 0.3<br>(0.1 to 0.5) |
|            | Both   | 5650<br>(5120 to 6120) | 13.3<br>(12.2 to 14.4) | 309<br>(78 to 602)  | 0.7<br>(0.2 to 1.4)  | 2 (0 to 8)    | 0 (0 to 0)          | 291<br>(166 to 442) | 0.7<br>(0.4 to 1.1) | 110<br>(13 to 340) | 0.3 (0 to 0.8)       | 422<br>(109 to 643) | 1 (0.3 to 1.5)      | 832<br>(191 to 1830) | 1.9<br>(0.4 to 4.1)  | 3310<br>(2500 to 4070) | 7.3<br>(5.5 to 9)     | 375<br>(67 to 725) | 0.9<br>(0.2 to 1.8) |
| Australia  | Male   | 3510<br>(3180 to 3830) | 17.6<br>(16 to 19.2)   | 185<br>(46 to 359)  | 0.9<br>(0.2 to 1.8)  | 1 (0 to 4)    | 0 (0 to 0)          | 185<br>(104 to 286) | 1 (0.5 to 1.5)      | 66 (8 to 202)      | 0.3 (0 to 1)         | 251<br>(62 to 381)  | 1.3<br>(0.3 to 1.9) | 544<br>(95 to 1280)  | 2.7<br>(0.5 to 6.2)  | 2750<br>(2020 to 3430) | 13.3<br>(9.7 to 16.6) | 254<br>(42 to 496) | 1.3<br>(0.2 to 2.5) |
|            | Female | 2140<br>(1880 to 2390) | 9.6<br>(8.5 to 10.6)   | 124<br>(32 to 246)  | 0.5<br>(0.1 to 1.1)  | 1 (0 to 4)    | 0 (0 to 0)          | 106<br>(61 to 164)  | 0.5<br>(0.3 to 0.8) | 44 (5 to 136)      | 0.2 (0 to 0.6)       | 172<br>(46 to 266)  | 0.8<br>(0.2 to 1.2) | 288<br>(54 to 687)   | 1.2<br>(0.2 to 2.9)  | 563<br>(326 to 828)    | 2.3<br>(1.3 to 3.3)   | 121<br>(19 to 241) | 0.6<br>(0.1 to 1.2) |
|            | Both   | 3010<br>(2800 to 3190) | 17.5<br>(16.3 to 18.5) | 352<br>(231 to 501) | 2 (1.3 to 2.9)       | 1 (0 to 4)    | 0 (0 to 0)          | 232<br>(139 to 340) | 1.4<br>(0.8 to 2)   | 398<br>(68 to 830) | 2.3<br>(0.4 to 4.8)  | 99 (22 to 152)      | 0.6<br>(0.1 to 0.9) | 361<br>(82 to 796)   | 2 (0.5 to 4.4)       | 751<br>(488 to 1020)   | 4 (2.6 to 5.4)        | 175<br>(31 to 340) | 1.1<br>(0.2 to 2.1) |
| Austria    | Male   | 2010<br>(1860 to 2150) | 25.6<br>(23.7 to 27.3) | 219<br>(145 to 314) | 2.8<br>(1.8 to 4)    | 1 (0 to 2)    | 0 (0 to 0)          | 156<br>(91 to 229)  | 2 (1.2 to 3)        | 248<br>(42 to 514) | 3.2<br>(0.5 to 6.6)  | 60 (12 to 95)       | 0.8<br>(0.2 to 1.2) | 238<br>(39 to 556)   | 3 (0.5 to 6.9)       | 672<br>(428 to 942)    | 8.2<br>(5.2 to 11.4)  | 126<br>(21 to 246) | 1.6<br>(0.3 to 3.2) |
|            | Female | 997<br>(894 to 1100)   | 10.9<br>(9.9 to 11.9)  | 133<br>(86 to 188)  | 1.4<br>(0.9 to 2)    | 1 (0 to 2)    | 0 (0 to 0)          | 77 (46 to 115)      | 0.9<br>(0.5 to 1.3) | 150<br>(25 to 316) | 1.6<br>(0.3 to 3.4)  | 39 (9 to 62)        | 0.4<br>(0.1 to 0.7) | 123<br>(23 to 289)   | 1.2<br>(0.2 to 2.9)  | 79 (44 to 121)         | 0.7<br>(0.4 to 1.1)   | 50 (8 to 100)      | 0.6<br>(0.1 to 1.2) |
|            | Both   | 1520<br>(1050 to 2010) | 15.3<br>(10.7 to 19.9) | 376<br>(199 to 570) | 3.9<br>(2.1 to 5.9)  | 28 (10 to 63) | 0.3<br>(0.1 to 0.7) | 166<br>(96 to 257)  | 1.7 (1 to 2.6)      | 138<br>(13 to 514) | 1.4<br>(0.1 to 5.2)  | 68 (15 to 115)      | 0.7<br>(0.2 to 1.2) | 173<br>(36 to 403)   | 1.9<br>(0.4 to 4.3)  | 39 (15 to 73)          | 0.5<br>(0.2 to 0.9)   | 146<br>(65 to 260) | 1.2<br>(0.5 to 2.1) |
| Azerbaijan | Male   | 1500<br>(1030 to 1990) | 34.1<br>(23.6 to 44.3) | 304<br>(157 to 475) | 6.8<br>(3.6 to 10.6) | 21 (7 to 48)  | 0.5<br>(0.2 to 1.1) | 112<br>(59 to 181)  | 2.6<br>(1.4 to 4.1) | 111<br>(10 to 405) | 2.5<br>(0.2 to 9.2)  | 54 (12 to 96)       | 1.2<br>(0.3 to 2.1) | 138<br>(23 to 335)   | 3.3<br>(0.5 to 8)    | 32 (10 to 64)          | 0.9<br>(0.3 to 1.7)   | 125<br>(52 to 230) | 2.2<br>(0.9 to 4)   |
|            | Female | 26 (17 to 38)          | 0.5<br>(0.3)           | 71 (39 to 112)      | 1.5<br>(0.8)         | 7 (3 to 16)   | 0.2<br>(0.1)        | 54 (32 to 82)       | 1.1<br>(0.6)        | 27 (3 to 97)       | 0.5<br>(0.1 to 2)    | 14 (3 to 23)        | 0.3<br>(0.1)        | 35 (7 to 86)         | 0.8<br>(0.1)         | 7 (3 to 13)            | 0.2<br>(0.1)          | 21 (9 to 40)       | 0.3<br>(0.1)        |
|            | Both   | 1520<br>(1050 to 2010) | 15.3<br>(10.7 to 19.9) | 376<br>(199 to 570) | 3.9<br>(2.1 to 5.9)  | 28 (10 to 63) | 0.3<br>(0.1 to 0.7) | 166<br>(96 to 257)  | 1.7 (1 to 2.6)      | 138<br>(13 to 514) | 1.4<br>(0.1 to 5.2)  | 68 (15 to 115)      | 0.7<br>(0.2 to 1.2) | 173<br>(36 to 403)   | 1.9<br>(0.4 to 4.3)  | 39 (15 to 73)          | 0.5<br>(0.2 to 0.9)   | 146<br>(65 to 260) | 1.2<br>(0.5 to 2.1) |

|            |        |                              |                              |                             |                            |                             |                           |                           |                           |                        |                           |                            |                           |                            |                            |                       |                            |                            |                           |
|------------|--------|------------------------------|------------------------------|-----------------------------|----------------------------|-----------------------------|---------------------------|---------------------------|---------------------------|------------------------|---------------------------|----------------------------|---------------------------|----------------------------|----------------------------|-----------------------|----------------------------|----------------------------|---------------------------|
|            |        |                              | to<br>0.7)                   |                             | to<br>2.3)                 |                             | to<br>0.3)                |                           | to<br>1.6)                |                        |                           |                            | to<br>0.5)                |                            | to<br>1.9)                 |                       | to<br>0.3)                 |                            | to<br>0.6)                |
| Bahamas    | Both   | 23 (18<br>to 29)             | 6 (4.8<br>to<br>7.5)         | 6 (2 to<br>12)              | 1.6<br>(0.4<br>to<br>3.1)  | 0 (0 to<br>0)               | 0 (0<br>to<br>0.1)        | 2 (1 to<br>3)             | 0.5<br>(0.3<br>to<br>0.8) | 2 (0 to<br>6)          | 0.4 (0<br>to<br>1.5)      | 2 (1 to<br>3)              | 0.5<br>(0.1<br>to<br>0.8) | 6 (1 to<br>14)             | 1.7<br>(0.4<br>to<br>3.7)  | 3 (2 to<br>5)         | 0.8<br>(0.5<br>to<br>1.4)  | 4 (2 to<br>6)              | 0.9<br>(0.4<br>to<br>1.5) |
|            | Male   | 20 (15<br>to 25)             | 11.4<br>(9.1<br>to<br>14.3)  | 4 (1 to<br>8)               | 2.4<br>(0.7<br>to<br>4.8)  | 0 (0 to<br>0)               | 0 (0<br>to<br>0.1)        | 1 (1 to<br>2)             | 0.8<br>(0.5<br>to<br>1.3) | 1 (0 to<br>4)          | 0.6 (0<br>to<br>2.4)      | 1 (0 to<br>2)              | 0.8<br>(0.2<br>to<br>1.3) | 4 (1 to<br>10)             | 2.8<br>(0.5<br>to<br>6.4)  | 3 (1 to<br>5)         | 1.9 (1<br>to<br>3.1)       | 3 (1 to<br>5)              | 1.5<br>(0.7<br>to<br>2.6) |
|            | Female | 3 (3 to<br>5)                | 1.7<br>(1.2<br>to<br>2.2)    | 2 (1 to<br>4)               | 0.9<br>(0.2<br>to<br>1.7)  | 0 (0 to<br>0)               | 0 (0<br>to<br>0.1)        | 1 (0 to<br>1)             | 0.3<br>(0.2<br>to<br>0.5) | 0 (0 to<br>2)          | 0.2 (0<br>to<br>0.8)      | 1 (0 to<br>1)              | 0.3<br>(0.1<br>to<br>0.5) | 2 (0 to<br>4)              | 0.9<br>(0.2<br>to<br>2.1)  | 0 (0 to<br>0)         | 0.1 (0<br>to<br>0.2)       | 1 (0 to<br>1)              | 0.3<br>(0.2<br>to<br>0.6) |
| Bahrain    | Both   | 85 (63<br>to 114)            | 13.8<br>(10.4<br>to<br>17.8) | 40 (27<br>to 57)            | 6.3<br>(4.2<br>to<br>8.6)  | 0 (0 to<br>0)               | 0 (0<br>to 0)             | 9 (5 to<br>15)            | 1.4<br>(0.8<br>to<br>2.3) | 4 (0 to<br>15)         | 0.7<br>(0.1<br>to<br>2.3) | 2 (1 to<br>4)              | 0.3<br>(0.1<br>to<br>0.6) | 30 (7<br>to 62)            | 5.2<br>(1.3<br>to<br>10.5) | 16 (7<br>to 27)       | 4.1<br>(1.9<br>to<br>6.5)  | 11 (5<br>to 19)            | 0.9<br>(0.4<br>to<br>1.6) |
|            | Male   | 75 (54<br>to 103)            | 22.9<br>(17.1<br>to<br>29.4) | 30 (20<br>to 45)            | 8.6<br>(5.8<br>to<br>12.2) | 0 (0 to<br>0)               | 0 (0<br>to 0)             | 7 (4 to<br>11)            | 1.9<br>(1.1<br>to<br>3.2) | 3 (0 to<br>11)         | 0.9<br>(0.1<br>to<br>3.2) | 2 (0 to<br>3)              | 0.4<br>(0.1<br>to<br>0.9) | 23 (4<br>to 49)            | 7.3<br>(1.5<br>to<br>15.3) | 16 (7<br>to 27)       | 8.2<br>(3.6<br>to<br>12.8) | 10 (4<br>to 18)            | 1.3<br>(0.6<br>to<br>2.4) |
|            | Female | 9 (7 to<br>13)               | 3.8<br>(2.8<br>to<br>5.1)    | 10 (7<br>to 14)             | 3.7<br>(2.6<br>to 5)       | 0 (0 to<br>0)               | 0 (0<br>to 0)             | 3 (1 to<br>4)             | 0.9<br>(0.5<br>to<br>1.4) | 1 (0 to<br>4)          | 0.4 (0<br>to<br>1.5)      | 1 (0 to<br>1)              | 0.2<br>(0.1<br>to<br>0.4) | 7 (2 to<br>15)             | 2.9<br>(0.7<br>to 6)       | 0 (0 to<br>0)         | 0.1<br>(0.1<br>to<br>0.2)  | 1 (0 to<br>2)              | 0.2<br>(0.1<br>to<br>0.4) |
| Bangladesh | Both   | 5640<br>(3670<br>to<br>8930) | 4.5 (3<br>to 7)              | 1550<br>(784<br>to<br>2750) | 1.2<br>(0.6<br>to<br>2.1)  | 1790<br>(919<br>to<br>3200) | 1.4<br>(0.7<br>to<br>2.5) | 432<br>(195<br>to<br>842) | 0.3<br>(0.2<br>to<br>0.7) | 347<br>(37 to<br>1190) | 0.3 (0<br>to<br>0.9)      | 600<br>(185<br>to<br>1220) | 0.5<br>(0.1<br>to 1)      | 731<br>(139<br>to<br>1980) | 0.6<br>(0.1<br>to<br>1.6)  | 269<br>(97 to<br>769) | 0.2<br>(0.1<br>to<br>0.7)  | 576<br>(222<br>to<br>1220) | 0.4<br>(0.2<br>to<br>0.9) |
|            | Male   | 5440<br>(3520<br>to<br>8650) | 8.2<br>(5.4<br>to<br>12.9)   | 1260<br>(644<br>to<br>2310) | 1.9 (1<br>to<br>3.4)       | 1330<br>(649<br>to<br>2470) | 2 (1<br>to<br>3.7)        | 285<br>(126<br>to<br>569) | 0.4<br>(0.2<br>to<br>0.9) | 270<br>(27 to<br>924)  | 0.4 (0<br>to<br>1.4)      | 467<br>(144<br>to<br>977)  | 0.7<br>(0.2<br>to<br>1.5) | 574<br>(90 to<br>1650)     | 0.9<br>(0.1<br>to<br>2.5)  | 231<br>(71 to<br>725) | 0.4<br>(0.1<br>to<br>1.2)  | 507<br>(191<br>to<br>1090) | 0.7<br>(0.3<br>to<br>1.5) |
|            | Female | 208<br>(124 to<br>332)       | 0.4<br>(0.2<br>to<br>0.6)    | 285<br>(142<br>to<br>488)   | 0.5<br>(0.2<br>to<br>0.8)  | 460<br>(254<br>to<br>776)   | 0.8<br>(0.4<br>to<br>1.3) | 147<br>(68 to<br>269)     | 0.2<br>(0.1<br>to<br>0.4) | 77 (8<br>to<br>254)    | 0.1 (0<br>to<br>0.4)      | 133<br>(46 to<br>249)      | 0.2<br>(0.1<br>to<br>0.4) | 157<br>(27 to<br>415)      | 0.3 (0<br>to<br>0.7)       | 38 (15<br>to 79)      | 0.1 (0<br>to<br>0.2)       | 70 (25<br>to<br>142)       | 0.1 (0<br>to<br>0.2)      |
| Barbados   | Both   | 19 (15<br>to 22)             | 3.7 (3<br>to<br>4.5)         | 7 (3 to<br>12)              | 1.4<br>(0.6<br>to<br>2.5)  | 0 (0 to<br>0)               | 0 (0<br>to 0)             | 1 (1 to<br>2)             | 0.2<br>(0.1<br>to<br>0.4) | 1 (0 to<br>5)          | 0.3 (0<br>to 1)           | 2 (1 to<br>4)              | 0.5<br>(0.2<br>to<br>0.8) | 6 (1 to<br>13)             | 1.2<br>(0.3<br>to<br>2.6)  | 3 (1 to<br>4)         | 0.5<br>(0.3<br>to<br>0.8)  | 3 (1 to<br>4)              | 0.5<br>(0.3<br>to<br>0.9) |

|         |        |                     |                     |                  |                  |             |                  |                  |                  |                  |                  |                 |                  |                   |                   |                     |                     |                 |                  |
|---------|--------|---------------------|---------------------|------------------|------------------|-------------|------------------|------------------|------------------|------------------|------------------|-----------------|------------------|-------------------|-------------------|---------------------|---------------------|-----------------|------------------|
|         | Male   | 16 (13 to 20)       | 7.3 (5.9 to 8.8)    | 5 (2 to 8)       | 2 (0.8 to 3.5)   | 0 (0 to 0)  | 0 (0 to 0)       | 1 (0 to 1)       | 0.3 (0.2 to 0.5) | 1 (0 to 3)       | 0.4 (0 to 1.5)   | 2 (1 to 2)      | 0.7 (0.2 to 1.1) | 4 (1 to 9)        | 1.7 (0.3 to 4)    | 2 (1 to 4)          | 1.1 (0.6 to 1.7)    | 2 (1 to 3)      | 0.8 (0.3 to 1.3) |
|         | Female | 2 (2 to 3)          | 0.9 (0.6 to 1.1)    | 3 (1 to 4)       | 0.9 (0.4 to 1.6) | 0 (0 to 0)  | 0 (0 to 0)       | 0 (0 to 1)       | 0.1 (0.1 to 0.2) | 0 (0 to 2)       | 0.2 (0 to 0.7)   | 1 (0 to 1)      | 0.3 (0.1 to 0.5) | 2 (0 to 5)        | 0.8 (0.2 to 1.8)  | 0 (0 to 1)          | 0.1 (0.1 to 0.2)    | 1 (0 to 1)      | 0.3 (0.1 to 0.5) |
| Belarus | Both   | 2640 (2040 to 3410) | 16.4 (12.7 to 21.2) | 414 (258 to 616) | 2.6 (1.6 to 3.9) | 4 (1 to 11) | 0 (0 to 0.1)     | 127 (69 to 203)  | 0.8 (0.4 to 1.3) | 60 (7 to 173)    | 0.4 (0 to 1.1)   | 154 (40 to 254) | 1 (0.2 to 1.6)   | 169 (32 to 415)   | 1 (0.2 to 2.6)    | 140 (64 to 248)     | 0.9 (0.4 to 1.5)    | 121 (18 to 253) | 0.8 (0.1 to 1.6) |
|         | Male   | 2490 (1920 to 3200) | 40.5 (31.5 to 51.7) | 353 (218 to 527) | 5.7 (3.5 to 8.5) | 3 (1 to 8)  | 0.1 (0 to 0.1)   | 89 (48 to 145)   | 1.4 (0.8 to 2.3) | 51 (6 to 146)    | 0.8 (0.1 to 2.4) | 131 (33 to 217) | 2.1 (0.6 to 3.5) | 145 (24 to 364)   | 2.4 (0.4 to 6)    | 115 (51 to 212)     | 2 (0.9 to 3.7)      | 104 (15 to 216) | 1.5 (0.2 to 3.1) |
|         | Female | 150 (106 to 205)    | 1.6 (1.1 to 2.2)    | 62 (38 to 93)    | 0.6 (0.4 to 0.9) | 1 (0 to 2)  | 0 (0 to 0)       | 37 (21 to 59)    | 0.4 (0.2 to 0.6) | 9 (1 to 26)      | 0.1 (0 to 0.3)   | 24 (6 to 39)    | 0.2 (0.1 to 0.4) | 24 (4 to 61)      | 0.2 (0 to 0.6)    | 25 (6 to 65)        | 0.2 (0.1 to 0.6)    | 18 (2 to 39)    | 0.2 (0 to 0.4)   |
| Belgium | Both   | 5740 (5350 to 6130) | 25.5 (23.9 to 27.2) | 696 (466 to 980) | 3.1 (2.1 to 4.3) | 1 (0 to 3)  | 0 (0 to 0)       | 296 (177 to 448) | 1.4 (0.9 to 2.1) | 439 (61 to 1090) | 2 (0.3 to 4.8)   | 284 (68 to 427) | 1.3 (0.3 to 1.9) | 700 (159 to 1540) | 3 (0.7 to 6.6)    | 2520 (1820 to 3210) | 10.3 (7.3 to 13.2)  | 257 (43 to 498) | 1.2 (0.2 to 2.4) |
|         | Male   | 4280 (3980 to 4570) | 41.5 (38.7 to 44.3) | 494 (330 to 693) | 4.8 (3.2 to 6.7) | 1 (0 to 2)  | 0 (0 to 0)       | 203 (119 to 314) | 2.1 (1.2 to 3.2) | 311 (43 to 770)  | 3 (0.4 to 7.5)   | 199 (46 to 302) | 1.9 (0.5 to 2.9) | 516 (84 to 1200)  | 4.9 (0.8 to 11.4) | 2350 (1660 to 3000) | 21.9 (15.4 to 28.1) | 204 (33 to 396) | 2 (0.3 to 4)     |
|         | Female | 1460 (1320 to 1600) | 12.6 (11.5 to 13.8) | 202 (134 to 285) | 1.7 (1.1 to 2.4) | 0 (0 to 1)  | 0 (0 to 0)       | 92 (55 to 139)   | 0.9 (0.5 to 1.3) | 128 (17 to 324)  | 1.1 (0.1 to 2.8) | 85 (21 to 129)  | 0.7 (0.2 to 1.1) | 184 (36 to 428)   | 1.4 (0.3 to 3.4)  | 178 (100 to 269)    | 1.3 (0.7 to 2)      | 53 (8 to 107)   | 0.5 (0.1 to 1)   |
| Belize  | Both   | 17 (15 to 20)       | 6.7 (5.6 to 7.8)    | 5 (2 to 9)       | 1.7 (0.6 to 3.3) | 1 (1 to 3)  | 0.5 (0.2 to 1)   | 1 (1 to 2)       | 0.4 (0.2 to 0.7) | 1 (0 to 4)       | 0.4 (0 to 1.4)   | 0 (0 to 0)      | 0.1 (0 to 0.1)   | 3 (1 to 7)        | 1.3 (0.3 to 2.9)  | 4 (2 to 6)          | 1.5 (0.9 to 2.3)    | 3 (1 to 5)      | 1 (0.5 to 1.6)   |
|         | Male   | 16 (13 to 18)       | 11.8 (9.9 to 13.9)  | 4 (1 to 7)       | 2.6 (0.9 to 4.8) | 1 (0 to 2)  | 0.7 (0.3 to 1.3) | 1 (0 to 1)       | 0.6 (0.3 to 0.9) | 1 (0 to 3)       | 0.5 (0 to 2.1)   | 0 (0 to 0)      | 0.1 (0 to 0.2)   | 2 (0 to 5)        | 1.8 (0.3 to 4.2)  | 4 (2 to 5)          | 2.9 (1.7 to 4.3)    | 2 (1 to 4)      | 1.6 (0.7 to 2.7) |
|         | Female | 2 (1 to 2)          | 1.4 (1.1)           | 1 (0 to 2)       | 0.9 (0.3)        | 0 (0 to 1)  | 0.3 (0.2)        | 0 (0 to 1)       | 0.3 (0.2)        | 0 (0 to 1)       | 0.2 (0 to 0.8)   | 0 (0 to 0)      | 0 (0 to 0.1)     | 1 (0 to 2)        | 0.8 (0.2)         | 0 (0 to 0)          | 0.1 (0.1)           | 0 (0 to 1)      | 0.3 (0.1)        |

|         |        |                        |                           |                       |                        |                       |                        |                 |                        |                     |                        |                  |                        |                       |                        |                       |                        |                       |                        |
|---------|--------|------------------------|---------------------------|-----------------------|------------------------|-----------------------|------------------------|-----------------|------------------------|---------------------|------------------------|------------------|------------------------|-----------------------|------------------------|-----------------------|------------------------|-----------------------|------------------------|
|         |        |                        | to<br>1.7)                |                       | to<br>1.6)             |                       | to<br>0.6)             |                 | to<br>0.4)             |                     |                        |                  |                        |                       | to<br>1.9)             |                       | to<br>0.2)             |                       | to<br>0.5)             |
| Benin   | Both   | 164<br>(121 to<br>219) | 3.8<br>(2.8 to<br>5.1)    | 38 (16<br>to 72)      | 0.9<br>(0.4 to<br>1.6) | 139<br>(88 to<br>209) | 3.1 (2<br>to<br>4.7)   | 12 (6<br>to 20) | 0.3<br>(0.1 to<br>0.4) | 22 (2<br>to 81)     | 0.5 (0<br>to<br>1.8)   | 28 (10<br>to 47) | 0.6<br>(0.2 to<br>1.1) | 39 (8<br>to 89)       | 1 (0.2<br>to<br>2.2)   | 12 (5<br>to 24)       | 0.3<br>(0.1 to<br>0.6) | 26 (11<br>to 47)      | 0.5<br>(0.2 to<br>0.9) |
|         | Male   | 153<br>(112 to<br>204) | 7.9<br>(5.8 to<br>10.4)   | 30 (12<br>to 56)      | 1.5<br>(0.6 to<br>2.8) | 98 (60<br>to<br>148)  | 4.9 (3<br>to<br>7.3)   | 8 (4 to<br>14)  | 0.4<br>(0.2 to<br>0.6) | 16 (1<br>to 60)     | 0.8<br>(0.1 to<br>3)   | 20 (7<br>to 34)  | 1 (0.3<br>to<br>1.7)   | 29 (5<br>to 69)       | 1.6<br>(0.3 to<br>3.7) | 10 (4<br>to 22)       | 0.6<br>(0.2 to<br>1.2) | 19 (8<br>to 35)       | 0.7<br>(0.3 to<br>1.4) |
|         | Female | 11 (7<br>to 17)        | 0.5<br>(0.3 to<br>0.7)    | 8 (3 to<br>16)        | 0.3<br>(0.1 to<br>0.6) | 41 (27<br>to 63)      | 1.7<br>(1.1 to<br>2.6) | 4 (2 to<br>7)   | 0.1<br>(0.1 to<br>0.2) | 6 (1 to<br>22)      | 0.2 (0<br>to<br>0.9)   | 8 (3 to<br>13)   | 0.3<br>(0.1 to<br>0.5) | 10 (2<br>to 25)       | 0.5<br>(0.1 to<br>1.1) | 1 (1 to<br>3)         | 0.1 (0<br>to<br>0.1)   | 7 (3 to<br>13)        | 0.2<br>(0.1 to<br>0.4) |
| Bermuda | Both   | 16 (13<br>to 19)       | 12.1<br>(10 to<br>14.6)   | 1 (0 to<br>2)         | 0.9<br>(0.2 to<br>1.8) | 0 (0 to<br>0)         | 0.1 (0<br>to<br>0.2)   | 1 (1 to<br>2)   | 0.9<br>(0.5 to<br>1.4) | 1 (0 to<br>4)       | 0.7<br>(0.1 to<br>2.7) | 1 (0 to<br>2)    | 1 (0.3<br>to<br>1.6)   | 3 (1 to<br>7)         | 2.3<br>(0.5 to<br>5.2) | 5 (3 to<br>7)         | 3.5<br>(2.2 to<br>5.1) | 2 (1 to<br>3)         | 1.5<br>(0.7 to<br>2.4) |
|         | Male   | 13 (11<br>to 15)       | 21.9<br>(18.2 to<br>26.1) | 1 (0 to<br>2)         | 1.4<br>(0.2 to<br>2.9) | 0 (0 to<br>0)         | 0.1 (0<br>to<br>0.3)   | 1 (0 to<br>1)   | 1.4<br>(0.8 to<br>2.3) | 1 (0 to<br>2)       | 1.2<br>(0.1 to<br>4.3) | 1 (0 to<br>1)    | 1.6<br>(0.5 to<br>2.5) | 2 (0 to<br>5)         | 3.9<br>(0.7 to<br>9)   | 5 (3 to<br>7)         | 8 (4.9<br>to<br>11.7)  | 1 (1 to<br>2)         | 2.4<br>(1.1 to<br>4.1) |
|         | Female | 3 (3 to<br>5)          | 4.5<br>(3.4 to<br>5.9)    | 0 (0 to<br>1)         | 0.5<br>(0.1 to<br>1)   | 0 (0 to<br>0)         | 0.1 (0<br>to<br>0.2)   | 0 (0 to<br>1)   | 0.5<br>(0.3 to<br>0.8) | 0 (0 to<br>1)       | 0.4 (0<br>to<br>1.5)   | 0 (0 to<br>1)    | 0.6<br>(0.2 to<br>0.9) | 1 (0 to<br>2)         | 1.1<br>(0.2 to<br>2.6) | 0 (0 to<br>1)         | 0.4<br>(0.2 to<br>0.7) | 0 (0 to<br>1)         | 0.6<br>(0.3 to<br>1)   |
| Bhutan  | Both   | 19 (12<br>to 26)       | 3.5<br>(2.3 to<br>5)      | 6 (3 to<br>9)         | 1.1<br>(0.6 to<br>1.8) | 7 (4 to<br>11)        | 1.2<br>(0.7 to<br>2)   | 1 (1 to<br>2)   | 0.3<br>(0.1 to<br>0.4) | 3 (0 to<br>10)      | 0.6<br>(0.1 to<br>1.8) | 2 (1 to<br>4)    | 0.4<br>(0.1 to<br>0.8) | 4 (1 to<br>9)         | 0.7<br>(0.2 to<br>1.7) | 3 (1 to<br>5)         | 0.6<br>(0.3 to<br>1)   | 2 (1 to<br>4)         | 0.3<br>(0.1 to<br>0.6) |
|         | Male   | 16 (10<br>to 24)       | 6.2<br>(3.9 to<br>9)      | 4 (2 to<br>8)         | 1.6<br>(0.8 to<br>2.9) | 5 (2 to<br>8)         | 1.7<br>(0.8 to<br>2.9) | 1 (0 to<br>2)   | 0.4<br>(0.2 to<br>0.7) | 2 (0 to<br>7)       | 0.8<br>(0.1 to<br>2.7) | 2 (1 to<br>3)    | 0.6<br>(0.2 to<br>1.1) | 3 (0 to<br>7)         | 1 (0.2<br>to<br>2.7)   | 2 (1 to<br>5)         | 1 (0.4<br>to 2)        | 1 (1 to<br>3)         | 0.5<br>(0.2 to<br>0.9) |
|         | Female | 2 (1 to<br>3)          | 0.8<br>(0.5 to<br>1.3)    | 1 (1 to<br>2)         | 0.5<br>(0.2 to<br>0.9) | 2 (1 to<br>4)         | 0.8<br>(0.4 to<br>1.3) | 0 (0 to<br>1)   | 0.1<br>(0.1 to<br>0.3) | 1 (0 to<br>3)       | 0.3 (0<br>to 1)        | 1 (0 to<br>1)    | 0.2<br>(0.1 to<br>0.5) | 1 (0 to<br>2)         | 0.4<br>(0.1 to<br>0.9) | 0 (0 to<br>1)         | 0.1 (0<br>to<br>0.2)   | 1 (0 to<br>1)         | 0.2<br>(0.1 to<br>0.4) |
| Bolivia | Both   | 408<br>(243 to<br>579) | 4.9<br>(2.9 to<br>6.9)    | 168<br>(86 to<br>280) | 2 (1 to<br>3.3)        | 91 (40<br>to<br>162)  | 1.1<br>(0.5 to<br>1.9) | 17 (7<br>to 32) | 0.2<br>(0.1 to<br>0.4) | 54 (3<br>to<br>196) | 0.6 (0<br>to<br>2.4)   | 47 (11<br>to 81) | 0.6<br>(0.1 to<br>1)   | 111<br>(23 to<br>282) | 1.4<br>(0.3 to<br>3.5) | 131<br>(57 to<br>235) | 1.7<br>(0.8 to<br>3.1) | 103<br>(42 to<br>188) | 1.1<br>(0.4 to<br>2)   |



|                        |        |                           |                        |                        |                       |                      |                     |                        |                     |                       |                      |                      |                     |                       |                     |                        |                       |                        |                     |
|------------------------|--------|---------------------------|------------------------|------------------------|-----------------------|----------------------|---------------------|------------------------|---------------------|-----------------------|----------------------|----------------------|---------------------|-----------------------|---------------------|------------------------|-----------------------|------------------------|---------------------|
|                        | Male   | 359<br>(207 to 518)       | 9.2<br>(5.3 to 13.2)   | 107<br>(53 to 181)     | 2.7<br>(1.3 to 4.6)   | 49 (20 to 92)        | 1.3<br>(0.5 to 2.3) | 10 (4 to 20)           | 0.3<br>(0.1 to 0.5) | 33 (2 to 123)         | 0.8<br>(0.1 to 3.1)  | 28 (7 to 51)         | 0.7<br>(0.2 to 1.3) | 71 (11 to 185)        | 1.9<br>(0.3 to 4.9) | 109<br>(43 to 204)     | 3.1<br>(1.3 to 5.8)   | 74 (27 to 142)         | 1.6<br>(0.6 to 3.1) |
|                        | Female | 49 (28 to 78)             | 1.1<br>(0.6 to 1.7)    | 61 (31 to 104)         | 1.4<br>(0.7 to 2.3)   | 42 (20 to 72)        | 1 (0.4 to 1.6)      | 7 (3 to 13)            | 0.1<br>(0.1 to 0.3) | 21 (1 to 77)          | 0.5 (0 to 1.7)       | 19 (4 to 33)         | 0.4<br>(0.1 to 0.7) | 40 (8 to 106)         | 0.9<br>(0.2 to 2.4) | 22 (9 to 44)           | 0.5<br>(0.2 to 1.1)   | 29 (11 to 55)          | 0.6<br>(0.2 to 1.1) |
| Bosnia and Herzegovina | Both   | 1920<br>(1490 to 2410)    | 31.4<br>(24.4 to 39.4) | 413<br>(270 to 574)    | 6.8<br>(4.5 to 9.5)   | 117<br>(43 to 241)   | 1.9<br>(0.7 to 4)   | 184<br>(107 to 287)    | 3 (1.8 to 4.7)      | 117<br>(10 to 387)    | 1.9<br>(0.2 to 6.4)  | 82 (20 to 132)       | 1.4<br>(0.3 to 2.2) | 309<br>(64 to 710)    | 5 (1 to 11.4)       | 118<br>(55 to 209)     | 1.9<br>(0.9 to 3.3)   | 77 (12 to 159)         | 1.3<br>(0.2 to 2.6) |
|                        | Male   | 1540<br>(1180 to 1940)    | 56.6<br>(44 to 71.3)   | 319<br>(210 to 437)    | 11.8<br>(7.8 to 16.1) | 81 (28 to 169)       | 3 (1 to 6.2)        | 133<br>(76 to 211)     | 4.9<br>(2.8 to 7.8) | 89 (7 to 295)         | 3.3<br>(0.3 to 10.9) | 62 (15 to 101)       | 2.3<br>(0.6 to 3.8) | 243<br>(42 to 574)    | 8.9<br>(1.5 to 21)  | 115<br>(53 to 206)     | 4.2 (2 to 7.6)        | 67 (10 to 137)         | 2.3<br>(0.3 to 4.7) |
|                        | Female | 377<br>(292 to 480)       | 11.3<br>(8.7 to 14.4)  | 93 (61 to 131)         | 2.8<br>(1.8 to 3.9)   | 36 (14 to 71)        | 1.1<br>(0.4 to 2.2) | 51 (29 to 78)          | 1.6<br>(0.9 to 2.4) | 28 (2 to 95)          | 0.8<br>(0.1 to 2.9)  | 20 (5 to 33)         | 0.6<br>(0.1 to 1)   | 66 (14 to 157)        | 1.9<br>(0.4 to 4.6) | 4 (1 to 8)             | 0.1 (0 to 0.2)        | 11 (1 to 23)           | 0.3 (0 to 0.7)      |
| Botswana               | Both   | 147<br>(104 to 192)       | 11.6<br>(8.4 to 15)    | 41 (23 to 65)          | 3.1<br>(1.8 to 4.8)   | 25 (11 to 45)        | 1.9<br>(0.9 to 3.5) | 14 (7 to 25)           | 1.1<br>(0.5 to 1.9) | 12 (1 to 43)          | 0.9<br>(0.1 to 3.2)  | 19 (6 to 32)         | 1.4<br>(0.5 to 2.4) | 27 (6 to 63)          | 2.3<br>(0.5 to 5.3) | 51 (28 to 80)          | 4.6<br>(2.5 to 6.9)   | 10 (4 to 19)           | 0.6<br>(0.2 to 1.1) |
|                        | Male   | 125<br>(89 to 160)        | 23.9<br>(17.1 to 30.1) | 30 (17 to 46)          | 5.3 (3 to 8)          | 16 (7 to 30)         | 2.8<br>(1.2 to 5.3) | 9 (4 to 15)            | 1.6<br>(0.8 to 2.7) | 8 (1 to 30)           | 1.5<br>(0.1 to 5.2)  | 13 (4 to 22)         | 2.3<br>(0.8 to 3.8) | 18 (3 to 44)          | 3.8<br>(0.7 to 9.2) | 47 (25 to 73)          | 10.8<br>(5.9 to 16.2) | 8 (3 to 15)            | 1.1<br>(0.4 to 2)   |
|                        | Female | 22 (14 to 33)             | 3.3<br>(2.1 to 4.9)    | 11 (6 to 20)           | 1.6<br>(0.8 to 2.7)   | 9 (4 to 17)          | 1.3<br>(0.6 to 2.3) | 5 (3 to 10)            | 0.7<br>(0.4 to 1.3) | 4 (0 to 13)           | 0.5 (0 to 1.8)       | 6 (2 to 10)          | 0.8<br>(0.2 to 1.4) | 9 (2 to 22)           | 1.3<br>(0.2 to 3.2) | 4 (2 to 9)             | 0.7<br>(0.3 to 1.5)   | 2 (1 to 4)             | 0.2<br>(0.1 to 0.4) |
| Brazil                 | Both   | 22000<br>(20400 to 23500) | 9.4<br>(8.7 to 10)     | 2840<br>(1830 to 4010) | 1.2<br>(0.8 to 1.7)   | 773<br>(322 to 1460) | 0.3<br>(0.1 to 0.6) | 1770<br>(1040 to 2680) | 0.7<br>(0.4 to 1.1) | 1540<br>(268 to 3350) | 0.7<br>(0.1 to 1.4)  | 890<br>(241 to 1360) | 0.4<br>(0.1 to 0.6) | 3330<br>(784 to 7210) | 1.4<br>(0.3 to 3.1) | 2990<br>(2020 to 4000) | 1.3<br>(0.9 to 1.8)   | 2110<br>(1090 to 3250) | 0.8<br>(0.4 to 1.3) |
|                        | Male   | 14200<br>(13200 to 15200) | 13.8<br>(12.8 to 14.8) | 1680<br>(1060 to 2390) | 1.6 (1 to 2.3)        | 394<br>(151 to 764)  | 0.4<br>(0.1 to 0.7) | 1010<br>(574 to 1560)  | 1 (0.5 to 1.5)      | 896<br>(155 to 1930)  | 0.9<br>(0.1 to 1.9)  | 501<br>(135 to 787)  | 0.5<br>(0.1 to 0.8) | 2030<br>(336 to 4660) | 2 (0.3 to 4.6)      | 2130<br>(1290 to 3060) | 2.3<br>(1.4 to 3.3)   | 1490<br>(712 to 2360)  | 1.3<br>(0.6 to 2)   |
|                        | Female | 7800<br>(7050)            | 6 (5.4 to 6.5)         | 1160<br>(737)          | 0.9<br>(0.6)          | 379<br>(166)         | 0.3<br>(0.1)        | 757<br>(445)           | 0.6<br>(0.3)        | 640<br>(111)          | 0.5<br>(0.1)         | 389<br>(101)         | 0.3<br>(0.1)        | 1300<br>(247)         | 1 (0.2 to 2.3)      | 862<br>(521)           | 0.7<br>(0.4 to 1)     | 625<br>(296)           | 0.5<br>(0.2)        |

|              |        |                              |                              |                           |                           |                           |                           |                           |                           |                       |                           |                       |                           |                       |                             |                      |                             |                       |                           |
|--------------|--------|------------------------------|------------------------------|---------------------------|---------------------------|---------------------------|---------------------------|---------------------------|---------------------------|-----------------------|---------------------------|-----------------------|---------------------------|-----------------------|-----------------------------|----------------------|-----------------------------|-----------------------|---------------------------|
|              |        | to<br>8520)                  |                              | to<br>1660)               | to<br>1.3)                | to<br>694)                | to<br>0.5)                | to<br>1150)               | to<br>0.9)                | to<br>1390)           | to<br>1.1)                | to<br>606)            | to<br>0.5)                | to<br>3000)           |                             | to<br>1260)          |                             | to<br>1010)           | to<br>0.7)                |
| Brunei       | Both   | 59 (50<br>to 68)             | 25.9<br>(22.4<br>to<br>29.9) | 4 (1 to<br>8)             | 1.8<br>(0.5<br>to<br>3.4) | 0 (0 to<br>0)             | 0 (0<br>to<br>0.1)        | 4 (2 to<br>6)             | 1.5<br>(0.8<br>to<br>2.3) | 1 (0 to<br>4)         | 0.4 (0<br>to<br>1.7)      | 5 (2 to<br>8)         | 2.3<br>(0.8<br>to<br>3.5) | 19 (5<br>to 38)       | 8.8<br>(2.4<br>to<br>17.4)  | 8 (5 to<br>12)       | 4.8<br>(3.2<br>to 7)        | 4 (1 to<br>8)         | 1.3<br>(0.2<br>to<br>2.5) |
|              | Male   | 41 (35<br>to 49)             | 45.1<br>(37.9<br>to<br>52.7) | 2 (1 to<br>4)             | 2.5<br>(0.7<br>to<br>4.8) | 0 (0 to<br>0)             | 0 (0<br>to<br>0.1)        | 2 (1 to<br>3)             | 1.6<br>(0.9<br>to<br>2.6) | 1 (0 to<br>2)         | 0.6 (0<br>to<br>2.2)      | 3 (1 to<br>5)         | 3.1 (1<br>to<br>4.9)      | 12 (2<br>to 25)       | 13.6<br>(2.8<br>to<br>27.9) | 6 (3 to<br>10)       | 11.6<br>(6.8<br>to<br>17.9) | 3 (0 to<br>5)         | 1.8<br>(0.3<br>to<br>3.6) |
|              | Female | 17 (14<br>to 21)             | 14.3<br>(11.2<br>to<br>17.6) | 2 (1 to<br>4)             | 1.5<br>(0.4<br>to<br>2.8) | 0 (0 to<br>0)             | 0 (0<br>to<br>0.1)        | 2 (1 to<br>3)             | 1.4<br>(0.8<br>to<br>2.2) | 0 (0 to<br>2)         | 0.4 (0<br>to<br>1.3)      | 2 (1 to<br>4)         | 1.9<br>(0.6<br>to<br>2.9) | 7 (2 to<br>15)        | 6 (1.3<br>to<br>12.7)       | 2 (1 to<br>3)        | 1.9 (1<br>to 3)             | 1 (0 to<br>3)         | 0.8<br>(0.1<br>to<br>1.7) |
| Bulgaria     | Both   | 3580<br>(2840<br>to<br>4430) | 26.4<br>(20.8<br>to<br>32.9) | 613<br>(423<br>to<br>858) | 4.5<br>(3.1<br>to<br>6.4) | 109<br>(31 to<br>258)     | 0.8<br>(0.2<br>to<br>1.9) | 272<br>(152<br>to<br>432) | 2.1<br>(1.1<br>to<br>3.3) | 183<br>(26 to<br>434) | 1.4<br>(0.2<br>to<br>3.2) | 211<br>(63 to<br>343) | 1.6<br>(0.5<br>to<br>2.6) | 410<br>(79 to<br>981) | 2.8<br>(0.5<br>to<br>6.8)   | 90 (42<br>to<br>156) | 0.6<br>(0.3<br>to<br>1.1)   | 207<br>(33 to<br>420) | 1.6<br>(0.3<br>to<br>3.3) |
|              | Male   | 3020<br>(2390<br>to<br>3750) | 49.2<br>(38.9<br>to<br>61.2) | 486<br>(333<br>to<br>681) | 8 (5.5<br>to<br>11.2)     | 78 (22<br>to<br>186)      | 1.3<br>(0.4<br>to<br>3.1) | 199<br>(109<br>to<br>318) | 3.3<br>(1.8<br>to<br>5.4) | 144<br>(20 to<br>343) | 2.4<br>(0.3<br>to<br>5.6) | 165<br>(49 to<br>269) | 2.7<br>(0.8<br>to<br>4.5) | 332<br>(54 to<br>819) | 5.3<br>(0.8<br>to<br>13)    | 79 (34<br>to<br>143) | 1.2<br>(0.5<br>to<br>2.2)   | 169<br>(27 to<br>343) | 2.8<br>(0.4<br>to<br>5.7) |
|              | Female | 561<br>(436 to<br>713)       | 7.7 (6<br>to<br>9.9)         | 127<br>(85 to<br>178)     | 1.7<br>(1.1<br>to<br>2.4) | 31 (10<br>to 72)          | 0.4<br>(0.1<br>to<br>0.9) | 73 (41<br>to<br>116)      | 1 (0.6<br>to<br>1.6)      | 39 (6<br>to 93)       | 0.5<br>(0.1<br>to<br>1.2) | 46 (13<br>to 75)      | 0.6<br>(0.2<br>to 1)      | 78 (15<br>to<br>188)  | 0.9<br>(0.2<br>to<br>2.3)   | 10 (5<br>to 18)      | 0.1<br>(0.1<br>to<br>0.2)   | 37 (5<br>to 80)       | 0.5<br>(0.1<br>to<br>1.2) |
| Burkina Faso | Both   | 222<br>(157 to<br>322)       | 2.6<br>(1.8<br>to<br>3.8)    | 48 (15<br>to<br>109)      | 0.6<br>(0.2<br>to<br>1.3) | 290<br>(178<br>to<br>472) | 3.5<br>(2.1<br>to<br>5.6) | 22 (10<br>to 38)          | 0.3<br>(0.1<br>to<br>0.4) | 39 (3<br>to 140)      | 0.5 (0<br>to<br>1.7)      | 60 (20<br>to 99)      | 0.7<br>(0.2<br>to<br>1.2) | 63 (13<br>to<br>152)  | 0.8<br>(0.2<br>to 2)        | 16 (7<br>to 38)      | 0.2<br>(0.1<br>to<br>0.5)   | 33 (14<br>to 61)      | 0.3<br>(0.1<br>to<br>0.6) |
|              | Male   | 216<br>(152 to<br>316)       | 5.6 (4<br>to<br>8.2)         | 39 (12<br>to 89)          | 1 (0.3<br>to<br>2.4)      | 214<br>(129<br>to<br>355) | 5.7<br>(3.5<br>to<br>9.4) | 15 (7<br>to 28)           | 0.4<br>(0.2<br>to<br>0.7) | 29 (2<br>to 106)      | 0.8<br>(0.1<br>to<br>2.9) | 45 (15<br>to 77)      | 1.2<br>(0.4<br>to<br>2.1) | 48 (8<br>to<br>121)   | 1.4<br>(0.2<br>to<br>3.6)   | 14 (5<br>to 36)      | 0.4<br>(0.1<br>to<br>1.1)   | 26 (10<br>to 49)      | 0.5<br>(0.2<br>to 1)      |
|              | Female | 6 (3 to<br>10)               | 0.1<br>(0.1<br>to<br>0.2)    | 9 (3 to<br>20)            | 0.2<br>(0.1<br>to<br>0.4) | 75 (45<br>to<br>130)      | 1.6 (1<br>to<br>2.8)      | 7 (3 to<br>12)            | 0.1<br>(0.1<br>to<br>0.2) | 9 (1 to<br>33)        | 0.2 (0<br>to<br>0.7)      | 15 (5<br>to 25)       | 0.3<br>(0.1<br>to<br>0.5) | 15 (3<br>to 37)       | 0.4<br>(0.1<br>to<br>0.9)   | 2 (1 to<br>5)        | 0.1 (0<br>to<br>0.1)        | 7 (3 to<br>13)        | 0.1 (0<br>to<br>0.2)      |
| Burundi      | Both   | 109<br>(75 to<br>153)        | 2.7<br>(1.9<br>to<br>3.8)    | 12 (4<br>to 29)           | 0.3<br>(0.1<br>to<br>0.7) | 107<br>(63 to<br>171)     | 2.5<br>(1.5<br>to 4)      | 4 (2 to<br>8)             | 0.1 (0<br>to<br>0.2)      | 13 (1<br>to 54)       | 0.3 (0<br>to<br>1.3)      | 7 (1 to<br>12)        | 0.2 (0<br>to<br>0.3)      | 18 (3<br>to 45)       | 0.5<br>(0.1<br>to<br>1.2)   | 12 (3<br>to 55)      | 0.4<br>(0.1<br>to<br>1.6)   | 22 (9<br>to 42)       | 0.4<br>(0.2<br>to<br>0.8) |

|            |        |                     |                     |                  |                  |                  |                  |                 |                  |               |                  |                 |                  |                 |                   |                 |                  |                 |                  |
|------------|--------|---------------------|---------------------|------------------|------------------|------------------|------------------|-----------------|------------------|---------------|------------------|-----------------|------------------|-----------------|-------------------|-----------------|------------------|-----------------|------------------|
|            | Male   | 103<br>(71 to 145)  | 5 (3.5 to 6.9)      | 10 (3 to 24)     | 0.5 (0.1 to 1.1) | 82 (48 to 132)   | 3.8 (2.3 to 6.1) | 3 (1 to 6)      | 0.1 (0.1 to 0.2) | 10 (1 to 41)  | 0.5 (0 to 1.9)   | 5 (1 to 9)      | 0.2 (0.1 to 0.4) | 15 (2 to 38)    | 0.8 (0.1 to 2)    | 10 (2 to 53)    | 0.6 (0.1 to 3)   | 17 (7 to 32)    | 0.6 (0.2 to 1.1) |
|            | Female | 6 (3 to 10)         | 0.3 (0.2 to 0.4)    | 2 (1 to 5)       | 0.1 (0 to 0.2)   | 25 (14 to 43)    | 1.2 (0.7 to 2.1) | 1 (0 to 2)      | 0 (0 to 0.1)     | 3 (0 to 12)   | 0.1 (0 to 0.6)   | 2 (0 to 3)      | 0.1 (0 to 0.1)   | 3 (0 to 8)      | 0.2 (0 to 0.5)    | 2 (0 to 5)      | 0.1 (0 to 0.3)   | 5 (2 to 11)     | 0.2 (0.1 to 0.4) |
| Cabo Verde | Both   | 22 (15 to 28)       | 5.5 (3.9 to 7.1)    | 16 (10 to 24)    | 4 (2.5 to 5.8)   | 5 (2 to 8)       | 1.2 (0.6 to 2)   | 2 (1 to 3)      | 0.5 (0.2 to 0.8) | 4 (0 to 14)   | 0.9 (0.1 to 3.5) | 4 (1 to 6)      | 1 (0.3 to 1.5)   | 7 (2 to 17)     | 1.9 (0.5 to 4.4)  | 1 (1 to 2)      | 0.3 (0.1 to 0.5) | 2 (1 to 3)      | 0.4 (0.2 to 0.7) |
|            | Male   | 19 (13 to 25)       | 11.6 (7.8 to 15.2)  | 11 (6 to 16)     | 6.5 (3.7 to 9.5) | 3 (1 to 5)       | 1.6 (0.7 to 3)   | 1 (1 to 2)      | 0.7 (0.3 to 1.2) | 2 (0 to 9)    | 1.4 (0.1 to 5.1) | 2 (1 to 4)      | 1.5 (0.5 to 2.4) | 4 (1 to 12)     | 3 (0.5 to 7.7)    | 1 (0 to 2)      | 0.7 (0.3 to 1.3) | 1 (1 to 2)      | 0.6 (0.3 to 1.2) |
|            | Female | 3 (2 to 4)          | 1.2 (0.9 to 1.7)    | 6 (4 to 8)       | 2.4 (1.5 to 3.5) | 2 (1 to 4)       | 0.9 (0.4 to 1.5) | 1 (0 to 1)      | 0.3 (0.2 to 0.5) | 1 (0 to 5)    | 0.6 (0 to 2.1)   | 1 (0 to 2)      | 0.6 (0.2 to 1)   | 3 (1 to 7)      | 1.2 (0.2 to 2.9)  | 0 (0 to 0)      | 0.1 (0 to 0.1)   | 1 (0 to 1)      | 0.2 (0.1 to 0.4) |
| Cambodia   | Both   | 1930 (1490 to 2450) | 17.5 (13.7 to 22.4) | 200 (89 to 356)  | 1.8 (0.8 to 3.2) | 711 (453 to 990) | 6.3 (4 to 8.7)   | 155 (89 to 246) | 1.3 (0.8 to 2.1) | 58 (5 to 227) | 0.5 (0 to 2)     | 176 (63 to 291) | 1.6 (0.6 to 2.5) | 284 (61 to 647) | 2.7 (0.6 to 6.1)  | 144 (77 to 233) | 1.5 (0.8 to 2.4) | 219 (96 to 389) | 1.6 (0.7 to 2.9) |
|            | Male   | 1740 (1340 to 2250) | 39.7 (30.6 to 52.1) | 157 (68 to 278)  | 3.5 (1.5 to 6.2) | 499 (305 to 716) | 11.1 (6.7 to 16) | 74 (41 to 123)  | 1.6 (0.9 to 2.7) | 42 (3 to 163) | 0.9 (0.1 to 3.5) | 128 (44 to 211) | 2.8 (1 to 4.7)   | 213 (37 to 511) | 5.2 (0.9 to 12.3) | 136 (70 to 223) | 3.6 (1.9 to 5.9) | 158 (66 to 286) | 2.8 (1.2 to 5.1) |
|            | Female | 185 (137 to 239)    | 3 (2.3 to 3.8)      | 43 (19 to 79)    | 0.6 (0.3 to 1.2) | 212 (137 to 297) | 3.2 (2.1 to 4.4) | 80 (45 to 127)  | 1.2 (0.7 to 1.8) | 16 (1 to 61)  | 0.2 (0 to 0.9)   | 49 (18 to 80)   | 0.7 (0.3 to 1.2) | 72 (14 to 169)  | 1.1 (0.2 to 2.6)  | 8 (3 to 15)     | 0.1 (0.1 to 0.2) | 61 (24 to 113)  | 0.8 (0.3 to 1.5) |
| Cameroon   | Both   | 531 (370 to 739)    | 4.9 (3.4 to 6.7)    | 261 (138 to 411) | 2.4 (1.3 to 3.8) | 269 (148 to 426) | 2.5 (1.4 to 3.9) | 31 (15 to 52)   | 0.3 (0.1 to 0.5) | 78 (6 to 278) | 0.7 (0.1 to 2.5) | 51 (12 to 90)   | 0.5 (0.1 to 0.8) | 114 (23 to 277) | 1.2 (0.2 to 2.8)  | 56 (26 to 105)  | 0.6 (0.3 to 1.1) | 74 (31 to 138)  | 0.5 (0.2 to 1)   |
|            | Male   | 512 (357 to 714)    | 9.8 (6.9 to 13.3)   | 196 (103 to 311) | 3.8 (2.1 to 5.9) | 179 (92 to 293)  | 3.5 (1.8 to 5.7) | 18 (9 to 31)    | 0.3 (0.2 to 0.6) | 55 (4 to 202) | 1.1 (0.1 to 3.9) | 36 (8 to 62)    | 0.7 (0.2 to 1.2) | 83 (13 to 210)  | 1.8 (0.3 to 4.7)  | 51 (22 to 97)   | 1.1 (0.5 to 2.1) | 56 (22 to 105)  | 0.8 (0.3 to 1.5) |
|            | Female | 19 (11 to 31)       | 0.4 (0.2 to 0.6)    | 65 (32 to 106)   | 1.1 (0.6 to 1.6) | 90 (50 to 146)   | 1.6 (0.9 to 2.3) | 13 (6 to 22)    | 0.2 (0.1 to 0.3) | 23 (2 to 78)  | 0.4 (0 to 1.4)   | 16 (4 to 27)    | 0.3 (0.1 to 0.5) | 31 (6 to 81)    | 0.6 (0.1 to 1.1)  | 5 (2 to 12)     | 0.1 (0 to 0.3)   | 18 (7 to 36)    | 0.3 (0.1 to 0.5) |

|                               |        |                                 |                              |                            |                           |                           |                            |                            |                           |                        |                           |                            |                           |                             |                           |                              |                            |                            |                           |
|-------------------------------|--------|---------------------------------|------------------------------|----------------------------|---------------------------|---------------------------|----------------------------|----------------------------|---------------------------|------------------------|---------------------------|----------------------------|---------------------------|-----------------------------|---------------------------|------------------------------|----------------------------|----------------------------|---------------------------|
|                               |        |                                 | to<br>0.6)                   |                            | to<br>1.8)                |                           | to<br>2.5)                 |                            | to<br>0.4)                |                        |                           |                            | to<br>0.5)                |                             | to<br>1.6)                |                              |                            |                            | to<br>0.5)                |
| Canada                        | Both   | 16300<br>(14900<br>to<br>17600) | 23<br>(21.2<br>to<br>24.8)   | 830<br>(353<br>to<br>1450) | 1.2<br>(0.5<br>to<br>2)   | 2 (0 to<br>6)             | 0 (0<br>to<br>0)           | 781<br>(466<br>to<br>1190) | 1.1<br>(0.7<br>to<br>1.7) | 678<br>(76 to<br>1930) | 1 (0.1<br>to<br>2.7)      | 862<br>(211<br>to<br>1300) | 1.2<br>(0.3<br>to<br>1.8) | 1900<br>(436<br>to<br>4210) | 2.6<br>(0.6<br>to<br>5.8) | 5540<br>(3950<br>to<br>7110) | 7.5<br>(5.3<br>to<br>9.7)  | 750<br>(126<br>to<br>1470) | 1.1<br>(0.2<br>to<br>2.2) |
|                               | Male   | 9320<br>(8540<br>to<br>10100)   | 28.5<br>(26.1<br>to<br>30.9) | 449<br>(194<br>to<br>771)  | 1.4<br>(0.6<br>to<br>2.4) | 1 (0 to<br>3)             | 0 (0<br>to<br>0)           | 461<br>(267<br>to<br>700)  | 1.4<br>(0.8<br>to<br>2.2) | 367<br>(41 to<br>1050) | 1.1<br>(0.1<br>to<br>3.2) | 457<br>(105<br>to<br>697)  | 1.4<br>(0.3<br>to<br>2.2) | 1130<br>(189<br>to<br>2640) | 3.4<br>(0.6<br>to<br>8)   | 4810<br>(3370<br>to<br>6300) | 14.6<br>(10.2<br>to<br>19) | 452<br>(70 to<br>898)      | 1.4<br>(0.2<br>to<br>2.7) |
|                               | Female | 6970<br>(6170<br>to<br>7750)    | 18.5<br>(16.4<br>to<br>20.4) | 381<br>(161<br>to<br>668)  | 1 (0.4<br>to<br>1.8)      | 1 (0 to<br>3)             | 0 (0<br>to<br>0)           | 321<br>(186<br>to<br>490)  | 0.9<br>(0.5<br>to<br>1.4) | 311<br>(35 to<br>892)  | 0.8<br>(0.1<br>to<br>2.4) | 405<br>(105<br>to<br>621)  | 1.1<br>(0.3<br>to<br>1.6) | 765<br>(145<br>to<br>1830)  | 2 (0.4<br>to<br>4.7)      | 726<br>(409<br>to<br>1110)   | 1.8 (1<br>to<br>2.7)       | 298<br>(44 to<br>607)      | 0.8<br>(0.1<br>to<br>1.7) |
| Central<br>Africa<br>Republic | Both   | 97 (45<br>to 186)               | 4.5<br>(2.3<br>to<br>8.3)    | 15 (3<br>to<br>39)         | 0.7<br>(0.1<br>to<br>1.7) | 92 (41<br>to<br>185)      | 4.2 (2<br>to<br>8.1)       | 6 (2 to<br>13)             | 0.2<br>(0.1<br>to<br>0.5) | 10 (1<br>to<br>41)     | 0.5 (0<br>to<br>1.8)      | 15 (4<br>to<br>34)         | 0.7<br>(0.2<br>to<br>1.5) | 24 (4<br>to<br>73)          | 1.2<br>(0.2<br>to<br>3.6) | 12 (3<br>to<br>39)           | 0.7<br>(0.2<br>to<br>2.2)  | 17 (5<br>to<br>40)         | 0.6<br>(0.2<br>to<br>1.4) |
|                               | Male   | 94 (42<br>to 181)               | 10.3<br>(5.3<br>to<br>18.6)  | 13 (3<br>to<br>35)         | 1.3<br>(0.3<br>to<br>3.5) | 75 (29<br>to<br>160)      | 7.8<br>(3.3<br>to<br>15.9) | 5 (2 to<br>11)             | 0.4<br>(0.1<br>to<br>1)   | 8 (1 to<br>35)         | 0.9<br>(0.1<br>to<br>3.5) | 13 (3<br>to<br>30)         | 1.3<br>(0.3<br>to<br>3)   | 20 (3<br>to<br>67)          | 2.4<br>(0.3<br>to<br>7.6) | 10 (2<br>to<br>37)           | 1.5<br>(0.3<br>to<br>5.3)  | 15 (4<br>to<br>36)         | 1.1<br>(0.3<br>to<br>2.7) |
|                               | Female | 3 (2 to<br>5)                   | 0.3<br>(0.2<br>to<br>0.5)    | 2 (1 to<br>4)              | 0.2 (0<br>to<br>0.4)      | 17 (10<br>to<br>29)       | 1.5<br>(0.9<br>to<br>2.6)  | 1 (1 to<br>2)              | 0.1 (0<br>to<br>0.2)      | 2 (0 to<br>6)          | 0.2 (0<br>to<br>0.6)      | 3 (1 to<br>5)              | 0.2<br>(0.1<br>to<br>0.4) | 3 (1 to<br>8)               | 0.3<br>(0.1<br>to<br>0.8) | 2 (0 to<br>4)                | 0.2 (0<br>to<br>0.4)       | 2 (1 to<br>4)              | 0.1<br>(0.1<br>to<br>0.3) |
| Chad                          | Both   | 240<br>(161 to<br>359)          | 4.8<br>(3.3<br>to<br>7.2)    | 35 (10<br>to<br>82)        | 0.7<br>(0.2<br>to<br>1.6) | 211<br>(122<br>to<br>350) | 4.1<br>(2.4<br>to<br>6.9)  | 14 (7<br>to<br>25)         | 0.3<br>(0.1<br>to<br>0.5) | 27 (2<br>to<br>97)     | 0.5 (0<br>to<br>1.9)      | 42 (14<br>to<br>75)        | 0.8<br>(0.3<br>to<br>1.5) | 46 (9<br>to<br>114)         | 1 (0.2<br>to<br>2.4)      | 12 (4<br>to<br>31)           | 0.2<br>(0.1<br>to<br>0.7)  | 26 (10<br>to<br>49)        | 0.4<br>(0.2<br>to<br>0.8) |
|                               | Male   | 230<br>(152 to<br>351)          | 8.5<br>(5.7<br>to<br>13)     | 30 (9<br>to<br>72)         | 1.1<br>(0.3<br>to<br>2.6) | 169<br>(96 to<br>299)     | 6.1<br>(3.4<br>to<br>10.8) | 11 (5<br>to<br>20)         | 0.4<br>(0.2<br>to<br>0.7) | 22 (1<br>to<br>77)     | 0.8<br>(0.1<br>to<br>2.8) | 34 (11<br>to<br>64)        | 1.2<br>(0.4<br>to<br>2.3) | 38 (6<br>to<br>102)         | 1.5<br>(0.2<br>to<br>4)   | 10 (4<br>to<br>30)           | 0.4<br>(0.1<br>to<br>1.1)  | 22 (8<br>to<br>43)         | 0.6<br>(0.2<br>to<br>1.2) |
|                               | Female | 10 (6<br>to 16)                 | 0.5<br>(0.3<br>to<br>0.8)    | 5 (1 to<br>11)             | 0.2<br>(0.1<br>to<br>0.5) | 42 (24<br>to<br>72)       | 1.7 (1<br>to<br>3)         | 4 (2 to<br>7)              | 0.1<br>(0.1<br>to<br>0.3) | 5 (0 to<br>19)         | 0.2 (0<br>to<br>0.8)      | 8 (3 to<br>14)             | 0.3<br>(0.1<br>to<br>0.6) | 8 (2 to<br>22)              | 0.4<br>(0.1<br>to<br>1)   | 1 (0 to<br>3)                | 0.1 (0<br>to<br>0.1)       | 4 (1 to<br>8)              | 0.1 (0<br>to<br>0.3)      |
| Chile                         | Both   | 2160<br>(1970<br>to<br>2360)    | 8.9<br>(8.1<br>to<br>9.7)    | 623<br>(446<br>to<br>828)  | 2.6<br>(1.8<br>to<br>3.4) | 35 (11<br>to<br>82)       | 0.1 (0<br>to<br>0.3)       | 213<br>(118<br>to<br>332)  | 0.9<br>(0.5<br>to<br>1.4) | 129 (9<br>to<br>466)   | 0.5 (0<br>to<br>1.9)      | 158<br>(39 to<br>236)      | 0.7<br>(0.2<br>to<br>1)   | 459<br>(111<br>to<br>971)   | 1.9<br>(0.5<br>to<br>4)   | 343<br>(208<br>to<br>498)    | 1.4<br>(0.9<br>to<br>2.1)  | 226<br>(115<br>to<br>356)  | 0.9<br>(0.5<br>to<br>1.4) |

|          |        |                                    |                              |                                    |                             |                                 |                           |                                 |                           |                                |                           |                                |                           |                                  |                            |                                 |                           |                                 |                           |
|----------|--------|------------------------------------|------------------------------|------------------------------------|-----------------------------|---------------------------------|---------------------------|---------------------------------|---------------------------|--------------------------------|---------------------------|--------------------------------|---------------------------|----------------------------------|----------------------------|---------------------------------|---------------------------|---------------------------------|---------------------------|
|          | Male   | 1360<br>(1230<br>to<br>1490)       | 12.5<br>(11.3<br>to<br>13.8) | 364<br>(262<br>to<br>484)          | 3.4<br>(2.4<br>to<br>4.5)   | 17 (5<br>to 42)                 | 0.2 (0<br>to<br>0.4)      | 127<br>(69 to<br>200)           | 1.2<br>(0.6<br>to<br>1.9) | 75 (5<br>to<br>273)            | 0.7 (0<br>to<br>2.6)      | 91 (23<br>to<br>138)           | 0.8<br>(0.2<br>to<br>1.3) | 268<br>(48 to<br>607)            | 2.5<br>(0.4<br>to<br>5.7)  | 293<br>(167<br>to<br>433)       | 2.8<br>(1.6<br>to<br>4.2) | 162<br>(76 to<br>263)           | 1.4<br>(0.7<br>to<br>2.3) |
|          | Female | 797<br>(698 to<br>897)             | 6 (5.2<br>to<br>6.7)         | 259<br>(184<br>to<br>344)          | 1.9<br>(1.4<br>to<br>2.5)   | 18 (5<br>to 43)                 | 0.1 (0<br>to<br>0.3)      | 86 (47<br>to<br>136)            | 0.6<br>(0.3<br>to 1)      | 54 (4<br>to<br>204)            | 0.4 (0<br>to<br>1.5)      | 67 (16<br>to<br>103)           | 0.5<br>(0.1<br>to<br>0.8) | 190<br>(38 to<br>425)            | 1.4<br>(0.3<br>to<br>3.1)  | 50 (27<br>to 82)                | 0.4<br>(0.2<br>to<br>0.6) | 64 (30<br>to<br>105)            | 0.5<br>(0.2<br>to<br>0.8) |
| China    | Both   | 492000<br>(399000<br>to<br>593000) | 24.9<br>(20.4<br>to<br>29.9) | 171000<br>(122000<br>to<br>228000) | 8.8<br>(6.3<br>to<br>11.6)  | 37300<br>(17400<br>to<br>66200) | 1.9<br>(0.9<br>to<br>3.3) | 59200<br>(35500<br>to<br>88200) | 3 (1.8<br>to<br>4.5)      | 28600<br>(5190<br>to<br>61100) | 1.5<br>(0.3<br>to<br>3.1) | 27200<br>(7160<br>to<br>43100) | 1.4<br>(0.4<br>to<br>2.2) | 53000<br>(11800<br>to<br>121000) | 2.7<br>(0.6<br>to<br>6.2)  | 23200<br>(14400<br>to<br>34700) | 1.3<br>(0.8<br>to 2)      | 41600<br>(19800<br>to<br>68000) | 1.9<br>(0.9<br>to<br>3.1) |
|          | Male   | 430000<br>(339000<br>to<br>534000) | 47.7<br>(37.9<br>to<br>58.5) | 120000<br>(81600<br>to<br>165000)  | 13.4<br>(9.2<br>to<br>18.2) | 22900<br>(10000<br>to<br>43600) | 2.5<br>(1.1<br>to<br>4.7) | 32100<br>(18300<br>to<br>50200) | 3.6<br>(2.1<br>to<br>5.6) | 19500<br>(3620<br>to<br>41900) | 2.2<br>(0.4<br>to<br>4.6) | 19000<br>(5000<br>to<br>31500) | 2.1<br>(0.6<br>to<br>3.5) | 37200<br>(6190<br>to<br>91100)   | 4.2<br>(0.7<br>to<br>10.2) | 18100<br>(9930<br>to<br>30000)  | 2.5<br>(1.4<br>to<br>4.1) | 28900<br>(13000<br>to<br>48800) | 2.6<br>(1.2<br>to<br>4.4) |
|          | Female | 61300<br>(48700<br>to<br>76500)    | 6.1<br>(4.8<br>to<br>7.5)    | 51100<br>(35900<br>to<br>69000)    | 5 (3.5<br>to<br>6.7)        | 14300<br>(6800<br>to<br>25000)  | 1.4<br>(0.7<br>to<br>2.4) | 27100<br>(16000<br>to<br>41200) | 2.6<br>(1.6<br>to 4)      | 9020<br>(1540<br>to<br>18900)  | 0.9<br>(0.1<br>to<br>1.8) | 8210<br>(2220<br>to<br>12900)  | 0.8<br>(0.2<br>to<br>1.3) | 15800<br>(2940<br>to<br>38900)   | 1.5<br>(0.3<br>to<br>3.8)  | 5070<br>(2590<br>to<br>7880)    | 0.5<br>(0.3<br>to<br>0.8) | 12600<br>(5420<br>to<br>21300)  | 1.1<br>(0.5<br>to<br>1.9) |
| Colombia | Both   | 2470<br>(1880<br>to<br>3210)       | 4.7<br>(3.6<br>to<br>6.1)    | 898<br>(567<br>to<br>1320)         | 1.7<br>(1.1<br>to<br>2.5)   | 166<br>(67 to<br>332)           | 0.3<br>(0.1<br>to<br>0.6) | 198<br>(98 to<br>339)           | 0.4<br>(0.2<br>to<br>0.6) | 344<br>(28 to<br>1270)         | 0.6<br>(0.1<br>to<br>2.4) | 185<br>(40 to<br>301)          | 0.3<br>(0.1<br>to<br>0.6) | 725<br>(172<br>to<br>1650)       | 1.4<br>(0.3<br>to<br>3.1)  | 262<br>(130<br>to<br>458)       | 0.5<br>(0.2<br>to<br>0.9) | 389<br>(185<br>to<br>659)       | 0.7<br>(0.3<br>to<br>1.2) |
|          | Male   | 1620<br>(1210<br>to<br>2100)       | 6.8<br>(5.1<br>to<br>8.9)    | 495<br>(313<br>to<br>735)          | 2.1<br>(1.3<br>to<br>3.1)   | 74 (28<br>to<br>156)            | 0.3<br>(0.1<br>to<br>0.7) | 117<br>(58 to<br>200)           | 0.5<br>(0.2<br>to<br>0.8) | 186<br>(15 to<br>694)          | 0.8<br>(0.1<br>to<br>2.9) | 97 (20<br>to<br>161)           | 0.4<br>(0.1<br>to<br>0.7) | 421<br>(72 to<br>1010)           | 1.8<br>(0.3<br>to<br>4.3)  | 209<br>(96 to<br>382)           | 0.9<br>(0.4<br>to<br>1.6) | 256<br>(114<br>to<br>451)       | 1 (0.5<br>to<br>1.8)      |
|          | Female | 850<br>(641 to<br>1100)            | 3 (2.2<br>to<br>3.8)         | 403<br>(255<br>to<br>599)          | 1.4<br>(0.9<br>to 2)        | 92 (39<br>to<br>176)            | 0.3<br>(0.1<br>to<br>0.6) | 82 (41<br>to<br>140)            | 0.3<br>(0.1<br>to<br>0.5) | 158<br>(13 to<br>590)          | 0.5 (0<br>to 2)           | 88 (19<br>to<br>145)           | 0.3<br>(0.1<br>to<br>0.5) | 304<br>(62 to<br>722)            | 1 (0.2<br>to<br>2.5)       | 54 (25<br>to 97)                | 0.2<br>(0.1<br>to<br>0.3) | 133<br>(59 to<br>234)           | 0.5<br>(0.2<br>to<br>0.8) |
| Comoros  | Both   | 14 (10<br>to 20)                   | 3.1<br>(2.3<br>to<br>4.3)    | 2 (1 to<br>3)                      | 0.4<br>(0.2<br>to<br>0.7)   | 9 (6 to<br>14)                  | 2 (1.3<br>to<br>2.9)      | 1 (1 to<br>2)                   | 0.3<br>(0.1<br>to<br>0.5) | 1 (0 to<br>6)                  | 0.3 (0<br>to<br>1.2)      | 1 (0 to<br>2)                  | 0.3<br>(0.1<br>to<br>0.5) | 2 (0 to<br>5)                    | 0.5<br>(0.1<br>to<br>1.1)  | 2 (1 to<br>7)                   | 0.4<br>(0.1<br>to<br>1.5) | 2 (1 to<br>4)                   | 0.4<br>(0.2<br>to<br>0.7) |
|          | Male   | 13 (9<br>to 19)                    | 6.6<br>(4.8)                 | 1 (1 to<br>3)                      | 0.6<br>(0.3)                | 6 (4 to<br>9)                   | 2.9<br>(1.7)              | 1 (0 to<br>1)                   | 0.4<br>(0.2)              | 1 (0 to<br>4)                  | 0.4 (0<br>to<br>1.7)      | 1 (0 to<br>2)                  | 0.4<br>(0.1)              | 1 (0 to<br>4)                    | 0.8<br>(0.1)               | 1 (0 to<br>6)                   | 0.7<br>(0.2)              | 1 (1 to<br>3)                   | 0.6<br>(0.2)              |

|                 |        |                        |                              |                      |                           |                     |                           |                     |                           |                    |                           |                    |                           |                      |                            |                    |                           |                     |                           |
|-----------------|--------|------------------------|------------------------------|----------------------|---------------------------|---------------------|---------------------------|---------------------|---------------------------|--------------------|---------------------------|--------------------|---------------------------|----------------------|----------------------------|--------------------|---------------------------|---------------------|---------------------------|
|                 |        |                        | to<br>9.2)                   |                      | to<br>1.2)                |                     | to<br>4.5)                |                     | to<br>0.7)                |                    |                           |                    | to<br>0.8)                |                      | to<br>1.9)                 |                    | to<br>3.2)                |                     | to<br>1.1)                |
|                 | Female | 1 (1 to<br>2)          | 0.4<br>(0.3<br>to<br>0.7)    | 1 (0 to<br>1)        | 0.2<br>(0.1<br>to<br>0.4) | 4 (2 to<br>5)       | 1.4<br>(0.9<br>to<br>1.9) | 1 (0 to<br>1)       | 0.2<br>(0.1<br>to<br>0.3) | 0 (0 to<br>2)      | 0.2 (0<br>to<br>0.8)      | 0 (0 to<br>1)      | 0.2 (0<br>to<br>0.3)      | 1 (0 to<br>1)        | 0.2 (0<br>to<br>0.6)       | 1 (0 to<br>1)      | 0.2<br>(0.1<br>to<br>0.4) | 1 (0 to<br>1)       | 0.2<br>(0.1<br>to<br>0.4) |
| Congo           | Both   | 143<br>(104 to<br>203) | 6.1<br>(4.6<br>to<br>8.4)    | 66 (32<br>to<br>114) | 2.7<br>(1.4<br>to<br>4.5) | 54 (27<br>to<br>96) | 2.2<br>(1.1<br>to<br>3.8) | 10 (5<br>to<br>18)  | 0.4<br>(0.2<br>to<br>0.7) | 15 (1<br>to<br>59) | 0.6 (0<br>to<br>2.4)      | 20 (6<br>to<br>37) | 0.8<br>(0.3<br>to<br>1.5) | 36 (7<br>to<br>84)   | 1.6<br>(0.3<br>to<br>3.6)  | 20 (7<br>to<br>61) | 1 (0.4<br>to<br>3.1)      | 17 (7<br>to<br>33)  | 0.5<br>(0.2<br>to<br>1)   |
|                 | Male   | 135<br>(99 to<br>193)  | 12.4<br>(9.5<br>to<br>17.2)  | 48 (24<br>to<br>81)  | 4.1<br>(2.1<br>to<br>6.9) | 34 (16<br>to<br>62) | 2.9<br>(1.4<br>to<br>5.3) | 6 (3 to<br>11)      | 0.5<br>(0.2<br>to<br>0.9) | 10 (1<br>to<br>40) | 0.9<br>(0.1<br>to<br>3.3) | 14 (4<br>to<br>25) | 1.2<br>(0.4<br>to<br>2.1) | 26 (4<br>to<br>65)   | 2.6<br>(0.4<br>to<br>6.1)  | 15 (5<br>to<br>56) | 1.7<br>(0.5<br>to<br>6.3) | 12 (5<br>to<br>24)  | 0.8<br>(0.3<br>to<br>1.5) |
|                 | Female | 7 (4 to<br>12)         | 0.6<br>(0.3<br>to<br>0.9)    | 18 (8<br>to<br>36)   | 1.4<br>(0.6<br>to<br>2.7) | 20 (9<br>to<br>35)  | 1.5<br>(0.7<br>to<br>2.6) | 4 (2 to<br>7)       | 0.3<br>(0.1<br>to<br>0.5) | 5 (0 to<br>19)     | 0.4 (0<br>to<br>1.5)      | 6 (2 to<br>12)     | 0.5<br>(0.1<br>to<br>0.9) | 9 (2 to<br>24)       | 0.8<br>(0.1<br>to<br>2)    | 5 (1 to<br>10)     | 0.5<br>(0.1<br>to<br>0.9) | 5 (2 to<br>10)      | 0.3<br>(0.1<br>to<br>0.6) |
| Cook<br>Islands | Both   | 4 (4 to<br>5)          | 17.5<br>(14.6<br>to<br>20.7) | 0 (0 to<br>1)        | 0.9<br>(0.2<br>to<br>2.3) | 0 (0 to<br>0)       | 0.2 (0<br>to<br>0.6)      | 0 (0 to<br>1)       | 1.8 (1<br>to<br>2.9)      | 0 (0 to<br>1)      | 1 (0.1<br>to<br>3.8)      | 0 (0 to<br>0)      | 1 (0.3<br>to<br>1.6)      | 1 (0 to<br>3)        | 4.8<br>(1.1<br>to<br>10.4) | 0 (0 to<br>1)      | 1.5<br>(0.7<br>to<br>3)   | 0 (0 to<br>1)       | 1.5<br>(0.7<br>to<br>2.5) |
|                 | Male   | 4 (3 to<br>5)          | 31.8<br>(26.5<br>to<br>37.6) | 0 (0 to<br>0)        | 1.6<br>(0.3<br>to<br>3.9) | 0 (0 to<br>0)       | 0.3 (0<br>to<br>0.9)      | 0 (0 to<br>1)       | 2.8<br>(1.5<br>to<br>4.6) | 0 (0 to<br>1)      | 1.7<br>(0.1<br>to<br>6.5) | 0 (0 to<br>0)      | 1.6<br>(0.4<br>to<br>2.7) | 1 (0 to<br>2)        | 8 (1.5<br>to<br>17.7)      | 0 (0 to<br>1)      | 3.2<br>(1.5<br>to<br>6.4) | 0 (0 to<br>1)       | 2.5<br>(1.1<br>to<br>4.3) |
|                 | Female | 1 (0 to<br>1)          | 4.2 (3<br>to<br>5.4)         | 0 (0 to<br>0)        | 0.4<br>(0.1<br>to<br>0.9) | 0 (0 to<br>0)       | 0.1 (0<br>to<br>0.3)      | 0 (0 to<br>0)       | 0.8<br>(0.4<br>to<br>1.4) | 0 (0 to<br>0)      | 0.4 (0<br>to<br>1.3)      | 0 (0 to<br>0)      | 0.4<br>(0.1<br>to<br>0.6) | 0 (0 to<br>1)        | 1.8<br>(0.4<br>to<br>4.2)  | 0 (0 to<br>0)      | 0.1 (0<br>to<br>0.2)      | 0 (0 to<br>0)       | 0.4<br>(0.2<br>to<br>0.8) |
| Costa Rica      | Both   | 240<br>(188 to<br>307) | 4.8<br>(3.7<br>to<br>6.1)    | 60 (38<br>to<br>88)  | 1.2<br>(0.7<br>to<br>1.7) | 6 (2 to<br>14)      | 0.1 (0<br>to<br>0.3)      | 19 (10<br>to<br>32) | 0.4<br>(0.2<br>to<br>0.6) | 23 (2<br>to<br>82) | 0.4 (0<br>to<br>1.6)      | 13 (3<br>to<br>21) | 0.3<br>(0.1<br>to<br>0.4) | 61 (13<br>to<br>139) | 1.2<br>(0.3<br>to<br>2.8)  | 16 (8<br>to<br>27) | 0.3<br>(0.2<br>to<br>0.5) | 27 (12<br>to<br>45) | 0.5<br>(0.2<br>to<br>0.8) |
|                 | Male   | 190<br>(146 to<br>244) | 8.3<br>(6.4<br>to<br>10.6)   | 39 (24<br>to<br>58)  | 1.7<br>(1.1<br>to<br>2.5) | 4 (1 to<br>8)       | 0.2 (0<br>to<br>0.4)      | 12 (7<br>to<br>21)  | 0.5<br>(0.3<br>to<br>0.9) | 15 (1<br>to<br>53) | 0.6 (0<br>to<br>2.3)      | 8 (2 to<br>14)     | 0.3<br>(0.1<br>to<br>0.6) | 43 (7<br>to<br>102)  | 1.9<br>(0.3<br>to<br>4.5)  | 14 (7<br>to<br>24) | 0.6<br>(0.3<br>to<br>1.1) | 21 (9<br>to<br>37)  | 0.8<br>(0.4<br>to<br>1.5) |
|                 | Female | 50 (37<br>to<br>65)    | 1.8<br>(1.4<br>to<br>2.4)    | 21 (13<br>to<br>30)  | 0.8<br>(0.5<br>to<br>1.1) | 3 (1 to<br>6)       | 0.1 (0<br>to<br>0.2)      | 7 (4 to<br>11)      | 0.2<br>(0.1<br>to<br>0.4) | 8 (1 to<br>29)     | 0.3 (0<br>to<br>1)        | 5 (1 to<br>8)      | 0.2 (0<br>to<br>0.3)      | 18 (4<br>to<br>45)   | 0.7<br>(0.1<br>to<br>1.6)  | 2 (1 to<br>4)      | 0.1 (0<br>to<br>0.2)      | 5 (2 to<br>10)      | 0.2<br>(0.1<br>to<br>0.3) |

|         |        |                        |                        |                      |                      |              |                     |                     |                     |                     |                     |                    |                     |                      |                      |                      |                       |                     |                     |
|---------|--------|------------------------|------------------------|----------------------|----------------------|--------------|---------------------|---------------------|---------------------|---------------------|---------------------|--------------------|---------------------|----------------------|----------------------|----------------------|-----------------------|---------------------|---------------------|
| Croatia | Both   | 2200<br>(1740 to 2770) | 25.5<br>(20 to 32.3)   | 374<br>(246 to 532)  | 4.3<br>(2.9 to 6.2)  | 19 (5 to 50) | 0.2<br>(0.1 to 0.6) | 229<br>(131 to 364) | 2.7<br>(1.6 to 4.3) | 154<br>(21 to 388)  | 1.8<br>(0.2 to 4.5) | 93 (22 to 149)     | 1.1<br>(0.3 to 1.7) | 319<br>(64 to 733)   | 3.5<br>(0.7 to 8.2)  | 695<br>(405 to 1040) | 7.5<br>(4.3 to 11.4)  | 95 (15 to 193)      | 1.2<br>(0.2 to 2.4) |
|         | Male   | 1730<br>(1360 to 2180) | 45.8<br>(36.2 to 57.7) | 280<br>(184 to 401)  | 7.4<br>(4.9 to 10.6) | 12 (3 to 34) | 0.3<br>(0.1 to 0.9) | 168<br>(95 to 267)  | 4.5<br>(2.6 to 7.1) | 115<br>(16 to 283)  | 3.1<br>(0.4 to 7.5) | 68 (16 to 111)     | 1.8<br>(0.4 to 3)   | 249<br>(41 to 593)   | 6.5<br>(1.1 to 15.4) | 663<br>(385 to 1010) | 16.8<br>(9.8 to 25.5) | 77 (12 to 156)      | 2 (0.3 to 4.1)      |
|         | Female | 469<br>(366 to 603)    | 9.8<br>(7.6 to 12.7)   | 94 (63 to 136)       | 2 (1.3 to 2.8)       | 6 (2 to 17)  | 0.1 (0 to 0.3)      | 61 (34 to 97)       | 1.3<br>(0.7 to 2.1) | 39 (6 to 98)        | 0.8<br>(0.1 to 2)   | 25 (6 to 40)       | 0.5<br>(0.1 to 0.8) | 70 (13 to 170)       | 1.3<br>(0.3 to 3.3)  | 32 (15 to 56)        | 0.6<br>(0.3 to 1)     | 18 (2 to 39)        | 0.4<br>(0.1 to 0.9) |
| Cuba    | Both   | 4560<br>(3720 to 5540) | 23.8<br>(19.4 to 28.8) | 801<br>(383 to 1390) | 4.2 (2 to 7.3)       | 26 (8 to 62) | 0.1 (0 to 0.3)      | 307<br>(174 to 487) | 1.6<br>(0.9 to 2.5) | 83 (6 to 317)       | 0.4 (0 to 1.6)      | 170<br>(41 to 276) | 0.9<br>(0.2 to 1.4) | 788<br>(182 to 1710) | 4.1<br>(0.9 to 8.8)  | 182<br>(99 to 300)   | 0.9<br>(0.5 to 1.5)   | 352<br>(168 to 585) | 1.9<br>(0.9 to 3.1) |
|         | Male   | 3240<br>(2630 to 3950) | 36.1<br>(29.3 to 44)   | 510<br>(243 to 881)  | 5.7<br>(2.7 to 9.8)  | 14 (4 to 36) | 0.2 (0 to 0.4)      | 191<br>(106 to 307) | 2.1<br>(1.2 to 3.4) | 53 (4 to 199)       | 0.6 (0 to 2.2)      | 105<br>(24 to 177) | 1.2<br>(0.3 to 2)   | 549<br>(101 to 1230) | 6.1<br>(1.1 to 13.7) | 154<br>(77 to 263)   | 1.7<br>(0.8 to 2.9)   | 239<br>(106 to 411) | 2.6<br>(1.2 to 4.5) |
|         | Female | 1330<br>(1050 to 1620) | 13.1<br>(10.4 to 16)   | 291<br>(139 to 508)  | 2.9<br>(1.4 to 5)    | 12 (4 to 28) | 0.1 (0 to 0.3)      | 116<br>(64 to 181)  | 1.2<br>(0.6 to 1.8) | 30 (2 to 116)       | 0.3 (0 to 1.1)      | 65 (16 to 106)     | 0.6<br>(0.2 to 1)   | 238<br>(46 to 564)   | 2.3<br>(0.4 to 5.4)  | 28 (15 to 50)        | 0.3<br>(0.1 to 0.5)   | 113<br>(50 to 193)  | 1.1<br>(0.5 to 2)   |
| Cyprus  | Both   | 353<br>(308 to 402)    | 17.6<br>(15.4 to 20.1) | 52 (34 to 73)        | 2.6<br>(1.7 to 3.7)  | 0 (0 to 0)   | 0 (0 to 0)          | 22 (13 to 33)       | 1.1<br>(0.7 to 1.7) | 3 (0 to 8)          | 0.2 (0 to 0.4)      | 15 (3 to 23)       | 0.7<br>(0.2 to 1.2) | 61 (14 to 130)       | 3 (0.7 to 6.5)       | 108<br>(72 to 147)   | 5.3<br>(3.5 to 7.2)   | 16 (3 to 31)        | 0.8<br>(0.2 to 1.6) |
|         | Male   | 294<br>(253 to 338)    | 31.3<br>(27 to 36.1)   | 40 (26 to 57)        | 4.3<br>(2.8 to 6.1)  | 0 (0 to 0)   | 0 (0 to 0)          | 15 (8 to 23)        | 1.6<br>(0.9 to 2.5) | 2 (0 to 6)          | 0.2 (0 to 0.6)      | 11 (3 to 18)       | 1.2<br>(0.3 to 1.9) | 49 (9 to 108)        | 5.1<br>(0.9 to 11.3) | 101<br>(66 to 139)   | 10.9<br>(7.1 to 15)   | 14 (3 to 27)        | 1.4<br>(0.3 to 2.8) |
|         | Female | 59 (49 to 70)          | 5.7<br>(4.7 to 6.7)    | 12 (8 to 17)         | 1.1<br>(0.8 to 1.6)  | 0 (0 to 0)   | 0 (0 to 0)          | 7 (4 to 10)         | 0.7<br>(0.4 to 1)   | 1 (0 to 2)          | 0.1 (0 to 0.2)      | 3 (1 to 5)         | 0.3<br>(0.1 to 0.5) | 12 (2 to 27)         | 1.2<br>(0.2 to 2.6)  | 6 (3 to 10)          | 0.6<br>(0.3 to 0.9)   | 2 (0 to 5)          | 0.2 (0 to 0.5)      |
| Czechia | Both   | 4560<br>(3760 to 5550) | 21.1<br>(17.3 to 25.7) | 747<br>(506 to 1050) | 3.5<br>(2.4 to 4.9)  | 9 (2 to 24)  | 0 (0 to 0.1)        | 335<br>(191 to 534) | 1.6<br>(0.9 to 2.6) | 618<br>(95 to 1440) | 2.9<br>(0.4 to 6.7) | 281<br>(76 to 447) | 1.3<br>(0.4 to 2.1) | 999<br>(227 to 2190) | 4.5 (1 to 9.9)       | 495<br>(280 to 802)  | 2.2<br>(1.2 to 3.5)   | 279<br>(42 to 559)  | 1.4<br>(0.2 to 2.7) |
|         | Male   | 3330<br>(2720)         | 34.9<br>(28.6)         | 508<br>(342)         | 5.4<br>(3.6)         | 5 (1 to 15)  | 0.1 (0 to 0.2)      | 239<br>(135)        | 2.6<br>(1.5 to 4)   | 420<br>(64 to 969)  | 4.5<br>(0.7)        | 190<br>(52 to 308) | 2 (0.5 to 3.2)      | 724<br>(132)         | 7.5<br>(1.4)         | 435<br>(230)         | 4.5<br>(2.4)          | 206<br>(31 to 411)  | 2.1<br>(0.3)        |

|                                            |        |                              |                              |                             |                           |                              |                            |                            |                           |                        |                           |                           |                           |                            |                           |                           |                           |                            |                           |
|--------------------------------------------|--------|------------------------------|------------------------------|-----------------------------|---------------------------|------------------------------|----------------------------|----------------------------|---------------------------|------------------------|---------------------------|---------------------------|---------------------------|----------------------------|---------------------------|---------------------------|---------------------------|----------------------------|---------------------------|
|                                            |        | to<br>4070)                  | to<br>42.7)                  | to<br>716)                  | to<br>7.6)                |                              |                            | to<br>378)                 |                           |                        | to<br>10.3)               |                           |                           | to<br>1620)                | to<br>16.9)               | to<br>715)                | to<br>7.4)                |                            | to<br>4.3)                |
|                                            | Female | 1230<br>(994 to<br>1510)     | 10.3<br>(8.3<br>to<br>12.6)  | 239<br>(161<br>to<br>342)   | 2 (1.3<br>to<br>2.9)      | 4 (1 to<br>10)               | 0 (0<br>to<br>0.1)         | 97 (55<br>to<br>154)       | 0.9<br>(0.5<br>to<br>1.4) | 198<br>(29 to<br>461)  | 1.7<br>(0.2<br>to<br>3.9) | 91 (26<br>to<br>146)      | 0.8<br>(0.2<br>to<br>1.2) | 275<br>(60 to<br>637)      | 2.2<br>(0.5<br>to<br>5.1) | 60 (31<br>to<br>101)      | 0.5<br>(0.2<br>to<br>0.8) | 73 (9<br>to<br>154)        | 0.7<br>(0.1<br>to<br>1.4) |
| Côte<br>d'Ivoire                           | Both   | 574<br>(413 to<br>755)       | 6.1<br>(4.4<br>to<br>8)      | 146<br>(65 to<br>257)       | 1.5<br>(0.7<br>to<br>2.7) | 297<br>(178<br>to<br>449)    | 3.1<br>(1.9<br>to<br>4.7)  | 57 (30<br>to<br>92)        | 0.6<br>(0.3<br>to<br>0.9) | 59 (3<br>to<br>236)    | 0.6 (0<br>to<br>2.5)      | 54 (13<br>to<br>89)       | 0.6<br>(0.1<br>to<br>0.9) | 92 (19<br>to<br>216)       | 1.1<br>(0.2<br>to<br>2.6) | 34 (15<br>to<br>66)       | 0.4<br>(0.2<br>to<br>0.8) | 58 (24<br>to<br>106)       | 0.5<br>(0.2<br>to<br>0.8) |
|                                            | Male   | 526<br>(375 to<br>695)       | 10.7<br>(7.8<br>to<br>14)    | 120<br>(53 to<br>211)       | 2.5<br>(1.1<br>to<br>4.4) | 222<br>(127<br>to<br>338)    | 4.6<br>(2.6<br>to<br>7)    | 41 (21<br>to<br>67)        | 0.8<br>(0.4<br>to<br>1.4) | 46 (3<br>to<br>184)    | 0.9<br>(0.1<br>to<br>3.8) | 41 (10<br>to<br>69)       | 0.9<br>(0.2<br>to<br>1.4) | 70 (11<br>to<br>176)       | 1.7<br>(0.3<br>to<br>4.2) | 31 (13<br>to<br>62)       | 0.8<br>(0.3<br>to<br>1.5) | 47 (19<br>to<br>88)        | 0.7<br>(0.3<br>to<br>1.3) |
|                                            | Female | 48 (34<br>to<br>68)          | 1.2<br>(0.8<br>to<br>1.7)    | 27 (12<br>to<br>49)         | 0.6<br>(0.3<br>to<br>1.1) | 76 (47<br>to<br>112)         | 1.7<br>(1.1<br>to<br>2.4)  | 16 (8<br>to<br>26)         | 0.3<br>(0.2<br>to<br>0.5) | 14 (1<br>to<br>53)     | 0.3 (0<br>to<br>1.2)      | 13 (3<br>to<br>21)        | 0.3<br>(0.1<br>to<br>0.4) | 22 (4<br>to<br>53)         | 0.5<br>(0.1<br>to<br>1.3) | 3 (1 to<br>6)             | 0.1 (0<br>to<br>0.2)      | 10 (4<br>to<br>20)         | 0.2<br>(0.1<br>to<br>0.3) |
| North<br>Korea                             | Both   | 5480<br>(4150<br>to<br>7180) | 17 (13<br>to<br>22.1)        | 1270<br>(695<br>to<br>1920) | 3.9<br>(2.2<br>to<br>5.9) | 1710<br>(1010<br>to<br>2600) | 5.3<br>(3.2<br>to<br>8.1)  | 637<br>(357<br>to<br>1010) | 2 (1.1<br>to<br>3.2)      | 443<br>(40 to<br>1510) | 1.4<br>(0.1<br>to<br>4.6) | 401<br>(111<br>to<br>656) | 1.2<br>(0.3<br>to<br>2)   | 591<br>(127<br>to<br>1370) | 1.9<br>(0.4<br>to<br>4.3) | 294<br>(159<br>to<br>466) | 0.9<br>(0.5<br>to<br>1.5) | 610<br>(262<br>to<br>1090) | 1.8<br>(0.8<br>to<br>3.1) |
|                                            | Male   | 4850<br>(3580<br>to<br>6400) | 38.2<br>(28.4<br>to<br>49.6) | 900<br>(467<br>to<br>1420)  | 7 (3.7<br>to<br>10.9)     | 1050<br>(570<br>to<br>1730)  | 8.2<br>(4.5<br>to<br>13.1) | 302<br>(166<br>to<br>509)  | 2.4<br>(1.3<br>to<br>4)   | 293<br>(26 to<br>984)  | 2.3<br>(0.2<br>to<br>7.6) | 263<br>(67 to<br>445)     | 2.1<br>(0.5<br>to<br>3.4) | 386<br>(61 to<br>973)      | 3.2<br>(0.5<br>to<br>8)   | 231<br>(111<br>to<br>392) | 2 (1<br>to<br>3.4)        | 421<br>(164<br>to<br>802)  | 2.7<br>(1.1<br>to<br>5.1) |
|                                            | Female | 638<br>(427 to<br>873)       | 3.3<br>(2.3<br>to<br>4.6)    | 368<br>(199<br>to<br>598)   | 1.9<br>(1.1<br>to<br>3.1) | 656<br>(390<br>to<br>977)    | 3.5 (2<br>to<br>5.2)       | 335<br>(185<br>to<br>536)  | 1.8 (1<br>to<br>2.9)      | 150<br>(14 to<br>514)  | 0.8<br>(0.1<br>to<br>2.7) | 138<br>(40 to<br>233)     | 0.7<br>(0.2<br>to<br>1.2) | 205<br>(39 to<br>512)      | 1.1<br>(0.2<br>to<br>2.7) | 63 (27<br>to<br>122)      | 0.3<br>(0.1<br>to<br>0.6) | 189<br>(71 to<br>360)      | 1 (0.4<br>to<br>1.9)      |
| Democrati<br>c Republic<br>of the<br>Congo | Both   | 1240<br>(588 to<br>2770)     | 3.6<br>(1.7<br>to<br>8)      | 273<br>(83 to<br>703)       | 0.8<br>(0.2<br>to<br>2)   | 1220<br>(573<br>to<br>2570)  | 3.6<br>(1.7<br>to<br>7.3)  | 44 (14<br>to<br>108)       | 0.1 (0<br>to<br>0.3)      | 161<br>(11 to<br>712)  | 0.5 (0<br>to<br>2)        | 232<br>(60 to<br>564)     | 0.7<br>(0.2<br>to<br>1.6) | 351<br>(56 to<br>1150)     | 1.1<br>(0.2<br>to<br>3.7) | 143<br>(29 to<br>573)     | 0.5<br>(0.1<br>to<br>2.1) | 236<br>(76 to<br>577)      | 0.5<br>(0.2<br>to<br>1.3) |
|                                            | Male   | 1180<br>(546 to<br>2710)     | 8.1<br>(3.8<br>to<br>18.3)   | 225<br>(60 to<br>632)       | 1.5<br>(0.4<br>to<br>4.1) | 918<br>(376<br>to<br>2260)   | 6.1<br>(2.5<br>to<br>14.7) | 33 (9<br>to<br>92)         | 0.2<br>(0.1<br>to<br>0.5) | 124 (8<br>to<br>583)   | 0.8<br>(0.1<br>to<br>3.8) | 178<br>(41 to<br>497)     | 1.2<br>(0.3<br>to<br>3.2) | 287<br>(36 to<br>1060)     | 2.2<br>(0.3<br>to<br>8)   | 109<br>(16 to<br>526)     | 1 (0.2<br>to<br>5)        | 186<br>(52 to<br>510)      | 0.9<br>(0.3<br>to<br>2.4) |
|                                            | Female | 53 (31<br>to<br>88)          | 0.3<br>(0.2<br>to<br>0.5)    | 48 (18<br>to<br>103)        | 0.3<br>(0.1<br>to<br>0.6) | 303<br>(175<br>to<br>512)    | 1.6<br>(0.9<br>to<br>2.8)  | 11 (4<br>to<br>22)         | 0.1 (0<br>to<br>0.1)      | 37 (2<br>to<br>146)    | 0.2 (0<br>to<br>0.8)      | 54 (16<br>to<br>97)       | 0.3<br>(0.1<br>to<br>0.5) | 64 (11<br>to<br>164)       | 0.4<br>(0.1<br>to<br>1)   | 35 (8<br>to<br>80)        | 0.2 (0<br>to<br>0.5)      | 49 (18<br>to<br>98)        | 0.2<br>(0.1<br>to<br>0.4) |



|                    |        |                        |                        |                     |                     |               |                     |                    |                     |                    |                     |                    |                     |                    |                     |                       |                        |                    |                     |
|--------------------|--------|------------------------|------------------------|---------------------|---------------------|---------------|---------------------|--------------------|---------------------|--------------------|---------------------|--------------------|---------------------|--------------------|---------------------|-----------------------|------------------------|--------------------|---------------------|
| Denmark            | Both   | 3250<br>(2980 to 3530) | 27.2<br>(24.9 to 29.5) | 269<br>(152 to 418) | 2.3<br>(1.3 to 3.5) | 0 (0 to 1)    | 0 (0 to 0)          | 154<br>(92 to 231) | 1.4<br>(0.8 to 2.1) | 257<br>(37 to 592) | 2.2<br>(0.3 to 5)   | 118<br>(27 to 180) | 1 (0.2 to 1.5)      | 343<br>(80 to 754) | 2.8<br>(0.7 to 6.1) | 1120<br>(810 to 1440) | 8.8<br>(6.3 to 11.5)   | 149<br>(26 to 290) | 1.3<br>(0.2 to 2.6) |
|                    | Male   | 1760<br>(1610 to 1910) | 31.8<br>(29.1 to 34.4) | 140<br>(79 to 216)  | 2.6<br>(1.4 to 4)   | 0 (0 to 1)    | 0 (0 to 0)          | 90 (53 to 136)     | 1.7 (1 to 2.5)      | 134<br>(19 to 305) | 2.4<br>(0.4 to 5.6) | 58 (13 to 92)      | 1.1<br>(0.2 to 1.7) | 187<br>(30 to 445) | 3.3<br>(0.5 to 7.9) | 956<br>(670 to 1250)  | 16.6<br>(11.5 to 21.9) | 91 (15 to 178)     | 1.7<br>(0.3 to 3.3) |
|                    | Female | 1490<br>(1310 to 1670) | 23.5<br>(20.8 to 26.2) | 128<br>(73 to 200)  | 2.1<br>(1.2 to 3.2) | 0 (0 to 1)    | 0 (0 to 0)          | 64 (37 to 96)      | 1.1<br>(0.7 to 1.7) | 123<br>(18 to 286) | 2 (0.3 to 4.6)      | 59 (14 to 94)      | 0.9<br>(0.2 to 1.5) | 155<br>(30 to 369) | 2.4<br>(0.5 to 5.6) | 162<br>(93 to 258)    | 2.3<br>(1.3 to 3.7)    | 58 (9 to 117)      | 1 (0.2 to 2.1)      |
| Djibouti           | Both   | 33 (19 to 58)          | 6.4 (4 to 10.8)        | 12 (5 to 23)        | 2.2 (1 to 4.1)      | 5 (2 to 9)    | 0.8<br>(0.4 to 1.6) | 2 (1 to 4)         | 0.4<br>(0.2 to 0.8) | 2 (0 to 8)         | 0.4 (0 to 1.4)      | 4 (1 to 8)         | 0.7<br>(0.2 to 1.5) | 4 (1 to 10)        | 0.8<br>(0.1 to 2.1) | 3 (1 to 12)           | 0.7<br>(0.2 to 2.8)    | 3 (1 to 6)         | 0.4<br>(0.1 to 0.8) |
|                    | Male   | 31 (18 to 56)          | 11.4 (7 to 19.6)       | 9 (4 to 20)         | 3.3 (1.4 to 6.6)    | 3 (1 to 7)    | 1.1<br>(0.4 to 2.5) | 2 (1 to 3)         | 0.5<br>(0.2 to 1.2) | 2 (0 to 6)         | 0.5 (0 to 2.2)      | 3 (1 to 7)         | 1.1<br>(0.3 to 2.4) | 3 (0 to 9)         | 1.2<br>(0.2 to 3.7) | 2 (0 to 12)           | 1.1<br>(0.2 to 5.3)    | 2 (1 to 5)         | 0.5<br>(0.2 to 1.2) |
|                    | Female | 2 (1 to 3)             | 0.8<br>(0.5 to 1.2)    | 2 (1 to 4)          | 0.9<br>(0.4 to 1.6) | 1 (1 to 2)    | 0.5<br>(0.2 to 0.9) | 1 (0 to 1)         | 0.3<br>(0.2 to 0.6) | 0 (0 to 2)         | 0.2 (0 to 0.7)      | 1 (0 to 2)         | 0.4<br>(0.1 to 0.6) | 1 (0 to 2)         | 0.3<br>(0.1 to 0.8) | 0 (0 to 1)            | 0.2<br>(0.1 to 0.5)    | 0 (0 to 1)         | 0.1<br>(0.1 to 0.3) |
| Dominica           | Both   | 6 (5 to 8)             | 7 (5.5 to 8.7)         | 2 (1 to 4)          | 2.2 (0.9 to 4)      | 0 (0 to 1)    | 0.3<br>(0.1 to 0.6) | 0 (0 to 1)         | 0.5<br>(0.3 to 0.8) | 1 (0 to 2)         | 0.6 (0 to 2.2)      | 0 (0 to 0)         | 0 (0 to 0.1)        | 2 (1 to 5)         | 2.7<br>(0.6 to 5.9) | 2 (1 to 3)            | 2 (1.1 to 3.1)         | 1 (0 to 1)         | 0.9<br>(0.4 to 1.6) |
|                    | Male   | 5 (4 to 7)             | 12.4 (9.7 to 15.5)     | 1 (1 to 3)          | 3.2 (1.3 to 5.8)    | 0 (0 to 0)    | 0.3<br>(0.1 to 0.8) | 0 (0 to 1)         | 0.7<br>(0.4 to 1.2) | 0 (0 to 1)         | 0.8<br>(0.1 to 3.3) | 0 (0 to 0)         | 0.1 (0 to 0.1)      | 2 (0 to 4)         | 4.2<br>(0.8 to 9.4) | 2 (1 to 3)            | 4.4<br>(2.5 to 6.9)    | 1 (0 to 1)         | 1.4<br>(0.6 to 2.6) |
|                    | Female | 1 (1 to 1)             | 2 (1.5 to 2.7)         | 1 (0 to 1)          | 1.3<br>(0.5 to 2.4) | 0 (0 to 0)    | 0.2<br>(0.1 to 0.4) | 0 (0 to 0)         | 0.3<br>(0.1 to 0.5) | 0 (0 to 1)         | 0.3 (0 to 1.3)      | 0 (0 to 0)         | 0 (0 to 0.1)        | 1 (0 to 2)         | 1.4<br>(0.3 to 3.2) | 0 (0 to 0)            | 0 (0 to 0.1)           | 0 (0 to 0)         | 0.4<br>(0.2 to 0.8) |
| Dominican Republic | Both   | 857<br>(627 to 1160)   | 9.6<br>(7.1 to 12.9)   | 162<br>(61 to 310)  | 1.8<br>(0.7 to 3.4) | 38 (14 to 76) | 0.4<br>(0.2 to 0.8) | 49 (26 to 83)      | 0.5<br>(0.3 to 0.9) | 39 (3 to 151)      | 0.4 (0 to 1.7)      | 12 (4 to 21)       | 0.1 (0 to 0.2)      | 100<br>(22 to 242) | 1.1<br>(0.2 to 2.7) | 36 (17 to 65)         | 0.4<br>(0.2 to 0.8)    | 101<br>(44 to 182) | 1 (0.5 to 1.9)      |
|                    | Male   | 598<br>(437 to 804)    | 14.1<br>(10.4 to 17.8) | 107<br>(41 to 202)  | 2.5<br>(0.9 to 5.1) | 22 (7 to 44)  | 0.5<br>(0.2 to 1)   | 33 (17 to 56)      | 0.8<br>(0.4 to 1.2) | 25 (2 to 96)       | 0.6 (0 to 2.2)      | 7 (2 to 14)        | 0.2<br>(0.1 to 0.3) | 65 (10 to 166)     | 1.6<br>(0.3 to 2.9) | 32 (14 to 58)         | 0.8<br>(0.4 to 1.2)    | 80 (32 to 149)     | 1.7<br>(0.7 to 2.7) |

|             |        |                           |                         |                           |                        |                  |                        |                        |                        |                     |                      |                      |                        |                         |                        |                      |                        |                        |                        |
|-------------|--------|---------------------------|-------------------------|---------------------------|------------------------|------------------|------------------------|------------------------|------------------------|---------------------|----------------------|----------------------|------------------------|-------------------------|------------------------|----------------------|------------------------|------------------------|------------------------|
|             |        |                           | to<br>18.9)             |                           | to<br>4.6)             |                  |                        |                        | to<br>1.3)             |                     |                      |                      | to<br>0.3)             |                         | to<br>3.9)             |                      | to<br>1.5)             |                        | to<br>3.1)             |
|             | Female | 259<br>(177 to<br>360)    | 5.6<br>(3.8 to<br>7.7)  | 55 (20<br>to<br>110)      | 1.2<br>(0.4 to<br>2.3) | 17 (6<br>to 32)  | 0.4<br>(0.1 to<br>0.7) | 16 (8<br>to 28)        | 0.3<br>(0.2 to<br>0.6) | 14 (1<br>to 52)     | 0.3 (0<br>to<br>1.1) | 5 (2 to<br>10)       | 0.1 (0<br>to<br>0.2)   | 35 (7<br>to 91)         | 0.8<br>(0.1 to<br>2)   | 4 (2 to<br>8)        | 0.1 (0<br>to<br>0.2)   | 21 (8<br>to 41)        | 0.4<br>(0.2 to<br>0.8) |
| Ecuador     | Both   | 584<br>(456 to<br>749)    | 4.1<br>(3.2 to<br>5.2)  | 210<br>(124 to<br>323)    | 1.5<br>(0.9 to<br>2.2) | 23 (8<br>to 50)  | 0.2<br>(0.1 to<br>0.3) | 23 (10<br>to 39)       | 0.2<br>(0.1 to<br>0.3) | 72 (6<br>to<br>250) | 0.5 (0<br>to<br>1.7) | 22 (6<br>to 38)      | 0.1 (0<br>to<br>0.3)   | 162<br>(38 to<br>363)   | 1.2<br>(0.3 to<br>2.6) | 77 (42<br>to<br>126) | 0.6<br>(0.3 to<br>1)   | 100<br>(49 to<br>169)  | 0.6<br>(0.3 to<br>1.1) |
|             | Male   | 457<br>(355 to<br>585)    | 6.8<br>(5.3 to<br>8.7)  | 119<br>(69 to<br>184)     | 1.8 (1<br>to<br>2.7)   | 11 (4<br>to 24)  | 0.2<br>(0.1 to<br>0.4) | 13 (5<br>to 22)        | 0.2<br>(0.1 to<br>0.3) | 40 (3<br>to<br>143) | 0.6 (0<br>to<br>2.1) | 11 (3<br>to 21)      | 0.2 (0<br>to<br>0.3)   | 91 (16<br>to<br>216)    | 1.4<br>(0.2 to<br>3.3) | 57 (29<br>to 98)     | 1 (0.5<br>to<br>1.7)   | 69 (31<br>to<br>121)   | 0.9<br>(0.4 to<br>1.6) |
|             | Female | 128<br>(94 to<br>169)     | 1.7<br>(1.2 to<br>2.2)  | 92 (54<br>to<br>141)      | 1.2<br>(0.7 to<br>1.8) | 13 (5<br>to 27)  | 0.2<br>(0.1 to<br>0.4) | 10 (4<br>to 17)        | 0.1<br>(0.1 to<br>0.2) | 32 (2<br>to<br>107) | 0.4 (0<br>to<br>1.4) | 10 (3<br>to 18)      | 0.1 (0<br>to<br>0.2)   | 72 (14<br>to<br>162)    | 1 (0.2<br>to<br>2.2)   | 20 (10<br>to 31)     | 0.3<br>(0.1 to<br>0.5) | 31 (14<br>to 55)       | 0.4<br>(0.2 to<br>0.7) |
| Egypt       | Both   | 3390<br>(2360 to<br>4760) | 5.4<br>(3.8 to<br>7.5)  | 1770<br>(1150 to<br>2550) | 2.8<br>(1.8 to<br>4)   | 1 (0 to<br>3)    | 0 (0<br>to 0)          | 405<br>(212 to<br>660) | 0.6<br>(0.3 to<br>1)   | 64 (7<br>to<br>178) | 0.1 (0<br>to<br>0.3) | 97 (22<br>to<br>179) | 0.2 (0<br>to<br>0.3)   | 515<br>(111 to<br>1230) | 0.9<br>(0.2 to<br>2.1) | 52 (8<br>to<br>206)  | 0.1 (0<br>to<br>0.4)   | 385<br>(158 to<br>717) | 0.5<br>(0.2 to<br>0.9) |
|             | Male   | 3290<br>(2280 to<br>4630) | 9.4<br>(6.6 to<br>13.2) | 1230<br>(764 to<br>1800)  | 3.5<br>(2.2 to<br>5.1) | 1 (0 to<br>2)    | 0 (0<br>to 0)          | 218<br>(107 to<br>369) | 0.6<br>(0.3 to<br>1)   | 44 (5<br>to<br>121) | 0.1 (0<br>to<br>0.3) | 64 (15<br>to<br>122) | 0.2 (0<br>to<br>0.3)   | 348<br>(59 to<br>890)   | 1 (0.2<br>to<br>2.7)   | 38 (3<br>to<br>184)  | 0.1 (0<br>to<br>0.6)   | 361<br>(145 to<br>681) | 0.9<br>(0.4 to<br>1.7) |
|             | Female | 108<br>(59 to<br>172)     | 0.5<br>(0.3 to<br>0.7)  | 544<br>(318 to<br>849)    | 2 (1.2<br>to<br>3.1)   | 1 (0 to<br>1)    | 0 (0<br>to 0)          | 188<br>(94 to<br>320)  | 0.6<br>(0.3 to<br>1.1) | 20 (2<br>to 58)     | 0.1 (0<br>to<br>0.2) | 33 (8<br>to 63)      | 0.1 (0<br>to<br>0.2)   | 167<br>(33 to<br>445)   | 0.7<br>(0.1 to<br>1.8) | 14 (3<br>to 39)      | 0.1 (0<br>to<br>0.2)   | 24 (9<br>to 48)        | 0.1 (0<br>to<br>0.1)   |
| El Salvador | Both   | 194<br>(143 to<br>256)    | 3.3<br>(2.4 to<br>4.3)  | 85 (48<br>to<br>141)      | 1.4<br>(0.8 to<br>2.4) | 27 (13<br>to 47) | 0.5<br>(0.2 to<br>0.8) | 14 (7<br>to 24)        | 0.2<br>(0.1 to<br>0.4) | 30 (2<br>to<br>109) | 0.5 (0<br>to<br>1.8) | 27 (7<br>to 45)      | 0.4<br>(0.1 to<br>0.7) | 74 (18<br>to<br>168)    | 1.2<br>(0.3 to<br>2.8) | 5 (2 to<br>10)       | 0.1 (0<br>to<br>0.2)   | 36 (17<br>to 63)       | 0.6<br>(0.3 to<br>1.1) |
|             | Male   | 139<br>(101 to<br>181)    | 5.6<br>(4.1 to<br>7.3)  | 45 (25<br>to 73)          | 1.8 (1<br>to<br>2.9)   | 11 (5<br>to 21)  | 0.5<br>(0.2 to<br>0.8) | 8 (4 to<br>13)         | 0.3<br>(0.2 to<br>0.5) | 15 (1<br>to 53)     | 0.6 (0<br>to<br>2.1) | 13 (4<br>to 22)      | 0.5<br>(0.1 to<br>0.9) | 41 (7<br>to 95)         | 1.6<br>(0.3 to<br>3.8) | 4 (1 to<br>7)        | 0.1<br>(0.1 to<br>0.3) | 23 (10<br>to 42)       | 0.9<br>(0.4 to<br>1.7) |
|             | Female | 56 (38<br>to 80)          | 1.6<br>(1.1 to<br>2.3)  | 40 (23<br>to 68)          | 1.2<br>(0.7 to<br>2)   | 16 (8<br>to 27)  | 0.5<br>(0.2 to<br>0.8) | 6 (3 to<br>11)         | 0.2<br>(0.1 to<br>0.3) | 15 (1<br>to 53)     | 0.4 (0<br>to<br>1.5) | 13 (4<br>to 22)      | 0.4<br>(0.1 to<br>0.6) | 33 (7<br>to 82)         | 1 (0.2<br>to<br>2.4)   | 2 (1 to<br>3)        | 0 (0<br>to<br>0.1)     | 13 (6<br>to 24)        | 0.4<br>(0.2 to<br>0.7) |

|                   |        |                  |                     |              |                   |               |                  |               |                  |               |                  |              |                  |                |                  |               |                  |              |                  |
|-------------------|--------|------------------|---------------------|--------------|-------------------|---------------|------------------|---------------|------------------|---------------|------------------|--------------|------------------|----------------|------------------|---------------|------------------|--------------|------------------|
| Equatorial Guinea | Both   | 24 (15 to 37)    | 5.5 (3.5 to 8.3)    | 17 (8 to 29) | 3.8 (2 to 6.4)    | 3 (1 to 7)    | 0.7 (0.3 to 1.5) | 2 (1 to 3)    | 0.4 (0.2 to 0.7) | 3 (0 to 11)   | 0.7 (0 to 2.4)   | 2 (1 to 4)   | 0.5 (0.1 to 0.9) | 7 (1 to 18)    | 1.7 (0.4 to 4.3) | 3 (1 to 11)   | 0.9 (0.3 to 2.9) | 3 (1 to 6)   | 0.5 (0.2 to 1)   |
|                   | Male   | 22 (14 to 34)    | 12.6 (7.8 to 19.1)  | 11 (5 to 19) | 5.9 (2.9 to 10.1) | 2 (1 to 4)    | 0.9 (0.3 to 2)   | 1 (0 to 2)    | 0.5 (0.2 to 1)   | 2 (0 to 7)    | 1 (0.1 to 3.6)   | 1 (0 to 3)   | 0.7 (0.2 to 1.4) | 5 (1 to 13)    | 2.9 (0.5 to 7.6) | 2 (0 to 10)   | 1.6 (0.4 to 6.3) | 2 (1 to 4)   | 0.9 (0.3 to 1.8) |
|                   | Female | 2 (1 to 3)       | 0.6 (0.3 to 1.1)    | 6 (3 to 11)  | 2.4 (1.1 to 4.1)  | 1 (1 to 3)    | 0.6 (0.2 to 1.2) | 1 (0 to 1)    | 0.3 (0.1 to 0.5) | 1 (0 to 4)    | 0.4 (0 to 1.6)   | 1 (0 to 2)   | 0.3 (0.1 to 0.6) | 2 (0 to 6)     | 0.9 (0.2 to 2.4) | 1 (0 to 2)    | 0.5 (0.2 to 1.1) | 1 (0 to 2)   | 0.2 (0.1 to 0.5) |
| Eritrea           | Both   | 62 (45 to 85)    | 2.4 (1.8 to 3.2)    | 21 (8 to 38) | 0.8 (0.3 to 1.5)  | 53 (31 to 80) | 2.1 (1.2 to 3.1) | 6 (3 to 10)   | 0.2 (0.1 to 0.4) | 8 (1 to 36)   | 0.3 (0 to 1.4)   | 12 (4 to 20) | 0.5 (0.1 to 0.7) | 12 (3 to 29)   | 0.6 (0.1 to 1.3) | 11 (4 to 29)  | 0.5 (0.2 to 1.4) | 16 (7 to 29) | 0.5 (0.2 to 0.9) |
|                   | Male   | 61 (44 to 83)    | 6 (4.4 to 7.9)      | 15 (6 to 28) | 1.5 (0.6 to 2.8)  | 33 (20 to 52) | 3.3 (2 to 4.9)   | 4 (2 to 7)    | 0.4 (0.2 to 0.6) | 6 (0 to 23)   | 0.5 (0 to 2.3)   | 8 (2 to 13)  | 0.7 (0.2 to 1.2) | 9 (1 to 22)    | 1 (0.2 to 2.6)   | 8 (2 to 26)   | 1 (0.3 to 3.6)   | 11 (5 to 21) | 0.8 (0.3 to 1.4) |
|                   | Female | 1 (1 to 2)       | 0.1 (0 to 0.1)      | 6 (2 to 11)  | 0.4 (0.1 to 0.8)  | 19 (11 to 30) | 1.3 (0.8 to 2)   | 2 (1 to 4)    | 0.1 (0.1 to 0.2) | 3 (0 to 12)   | 0.2 (0 to 0.8)   | 4 (1 to 7)   | 0.3 (0.1 to 0.5) | 4 (1 to 9)     | 0.3 (0.1 to 0.7) | 3 (1 to 6)    | 0.2 (0.1 to 0.5) | 5 (2 to 9)   | 0.3 (0.1 to 0.5) |
| Estonia           | Both   | 511 (400 to 644) | 19.7 (15.3 to 25)   | 20 (7 to 37) | 0.7 (0.3 to 1.4)  | 4 (1 to 15)   | 0.2 (0 to 0.6)   | 31 (17 to 50) | 1.2 (0.7 to 2)   | 51 (6 to 118) | 1.9 (0.2 to 4.5) | 32 (9 to 54) | 1.2 (0.3 to 2.1) | 50 (11 to 116) | 1.8 (0.4 to 4.3) | 46 (25 to 75) | 1.6 (0.8 to 2.6) | 19 (3 to 39) | 0.8 (0.1 to 1.7) |
|                   | Male   | 405 (317 to 515) | 40.7 (31.8 to 51.6) | 14 (4 to 26) | 1.4 (0.4 to 2.7)  | 3 (0 to 9)    | 0.3 (0 to 0.9)   | 22 (12 to 35) | 2.2 (1.2 to 3.6) | 36 (4 to 85)  | 3.6 (0.4 to 8.6) | 23 (6 to 38) | 2.3 (0.6 to 3.9) | 37 (6 to 88)   | 3.7 (0.6 to 8.8) | 41 (20 to 69) | 4.1 (2.1 to 7)   | 14 (2 to 28) | 1.4 (0.2 to 2.9) |
|                   | Female | 106 (80 to 135)  | 6.5 (4.9 to 8.5)    | 6 (2 to 11)  | 0.4 (0.1 to 0.7)  | 2 (0 to 6)    | 0.1 (0 to 0.3)   | 9 (5 to 15)   | 0.6 (0.3 to 1)   | 15 (2 to 34)  | 0.9 (0.1 to 2.1) | 10 (3 to 16) | 0.6 (0.2 to 1)   | 14 (3 to 34)   | 0.8 (0.1 to 1.9) | 5 (2 to 9)    | 0.3 (0.1 to 0.5) | 5 (1 to 11)  | 0.4 (0.1 to 0.8) |
| eSwatini          | Both   | 28 (17 to 40)    | 5.4 (3.3 to 7.5)    | 12 (6 to 20) | 2.1 (1 to 3.5)    | 15 (7 to 25)  | 2.7 (1.3 to 4.4) | 2 (1 to 4)    | 0.3 (0.1 to 0.6) | 5 (0 to 18)   | 0.8 (0 to 3.2)   | 5 (2 to 10)  | 1 (0.3 to 1.7)   | 10 (2 to 25)   | 1.9 (0.4 to 4.7) | 23 (10 to 39) | 4.4 (2.1 to 7.2) | 3 (1 to 5)   | 0.4 (0.1 to 0.7) |
|                   | Male   | 23 (13 to 33)    | 11 (6.4)            | 9 (4 to 15)  | 3.8 (1.8)         | 10 (4 to 17)  | 4.3 (1.9)        | 1 (0 to 2)    | 0.5 (0.2 to 1)   | 3 (0 to 13)   | 1.4 (0.1)        | 4 (1 to 7)   | 1.7 (0.5 to 3)   | 7 (1 to 18)    | 3.4 (0.6)        | 21 (10 to 36) | 11.4 (5.5)       | 2 (1 to 4)   | 0.7 (0.2)        |

|          |        |                     |                     |                 |                  |                   |                  |               |                  |                 |                  |                 |                  |                 |                  |                  |                    |                 |                  |
|----------|--------|---------------------|---------------------|-----------------|------------------|-------------------|------------------|---------------|------------------|-----------------|------------------|-----------------|------------------|-----------------|------------------|------------------|--------------------|-----------------|------------------|
|          |        |                     | to<br>15.4)         |                 | to<br>6.5)       |                   | to<br>7.6)       |               |                  |                 | to<br>5.8)       |                 |                  |                 | to<br>8.9)       |                  | to<br>18.2)        |                 | to<br>1.4)       |
|          | Female | 5 (3 to 8)          | 1.9 (1.1 to 3)      | 3 (1 to 5)      | 0.9 (0.4 to 1.7) | 5 (3 to 9)        | 1.6 (0.8 to 2.8) | 1 (0 to 1)    | 0.2 (0.1 to 0.4) | 1 (0 to 5)      | 0.4 (0 to 1.6)   | 2 (0 to 3)      | 0.5 (0.2 to 1)   | 3 (1 to 8)      | 1 (0.2 to 2.7)   | 1 (1 to 3)       | 0.5 (0.2 to 1.1)   | 1 (0 to 1)      | 0.1 (0 to 0.3)   |
| Ethiopia | Both   | 465 (296 to 674)    | 1.3 (0.8 to 1.9)    | 123 (55 to 236) | 0.3 (0.1 to 0.6) | 692 (403 to 1110) | 1.8 (1.1 to 3)   | 21 (9 to 39)  | 0.1 (0 to 0.1)   | 95 (12 to 258)  | 0.3 (0 to 0.7)   | 150 (52 to 263) | 0.4 (0.1 to 0.7) | 119 (23 to 296) | 0.3 (0.1 to 0.8) | 115 (24 to 554)  | 0.3 (0.1 to 1.6)   | 146 (64 to 264) | 0.3 (0.1 to 0.6) |
|          | Male   | 456 (291 to 660)    | 2.5 (1.6 to 3.6)    | 100 (43 to 193) | 0.5 (0.2 to 1)   | 541 (320 to 851)  | 2.8 (1.7 to 4.5) | 16 (7 to 31)  | 0.1 (0 to 0.2)   | 75 (10 to 203)  | 0.4 (0.1 to 1.1) | 119 (42 to 207) | 0.6 (0.2 to 1.1) | 99 (16 to 255)  | 0.5 (0.1 to 1.4) | 97 (16 to 525)   | 0.6 (0.1 to 3)     | 120 (51 to 219) | 0.5 (0.2 to 1)   |
|          | Female | 9 (5 to 17)         | 0.1 (0 to 0.1)      | 23 (11 to 46)   | 0.1 (0.1 to 0.2) | 151 (75 to 285)   | 0.8 (0.4 to 1.5) | 5 (2 to 11)   | 0 (0 to 0)       | 20 (2 to 58)    | 0.1 (0 to 0.3)   | 32 (10 to 63)   | 0.2 (0.1 to 0.3) | 20 (3 to 59)    | 0.1 (0 to 0.3)   | 18 (4 to 38)     | 0.1 (0 to 0.2)     | 26 (10 to 55)   | 0.1 (0 to 0.2)   |
| Fiji     | Both   | 36 (28 to 45)       | 5.1 (4.1 to 6.4)    | 5 (1 to 12)     | 0.7 (0.2 to 1.7) | 4 (2 to 9)        | 0.7 (0.3 to 1.2) | 3 (2 to 6)    | 0.5 (0.2 to 0.8) | 2 (0 to 8)      | 0.3 (0 to 1.2)   | 4 (2 to 7)      | 0.6 (0.2 to 1)   | 15 (4 to 31)    | 2.2 (0.6 to 4.5) | 5 (3 to 9)       | 0.9 (0.5 to 1.4)   | 4 (2 to 6)      | 0.4 (0.2 to 0.7) |
|          | Male   | 29 (23 to 37)       | 9.7 (7.6 to 12)     | 3 (1 to 8)      | 1.1 (0.3 to 2.6) | 3 (1 to 5)        | 0.8 (0.3 to 1.6) | 2 (1 to 3)    | 0.6 (0.3 to 1)   | 1 (0 to 5)      | 0.5 (0 to 1.7)   | 3 (1 to 5)      | 0.9 (0.3 to 1.5) | 10 (2 to 21)    | 3.4 (0.7 to 7.2) | 5 (3 to 9)       | 2.2 (1.2 to 3.5)   | 3 (1 to 5)      | 0.6 (0.3 to 1.1) |
|          | Female | 6 (5 to 9)          | 1.7 (1.2 to 2.3)    | 2 (1 to 4)      | 0.5 (0.1 to 1.1) | 2 (1 to 4)        | 0.5 (0.2 to 1)   | 1 (1 to 3)    | 0.4 (0.2 to 0.7) | 1 (0 to 3)      | 0.2 (0 to 0.8)   | 2 (1 to 3)      | 0.4 (0.1 to 0.7) | 5 (1 to 11)     | 1.4 (0.3 to 3.1) | 0 (0 to 0)       | 0.1 (0 to 0.1)     | 1 (0 to 2)      | 0.2 (0.1 to 0.4) |
| Finland  | Both   | 1650 (1500 to 1790) | 13 (11.9 to 14.1)   | 48 (9 to 105)   | 0.4 (0.1 to 0.8) | 0 (0 to 1)        | 0 (0 to 0)       | 62 (36 to 96) | 0.5 (0.3 to 0.8) | 200 (30 to 447) | 1.6 (0.2 to 3.5) | 115 (32 to 171) | 0.9 (0.2 to 1.4) | 297 (72 to 638) | 2.2 (0.5 to 4.9) | 719 (490 to 964) | 5.2 (3.5 to 7)     | 90 (16 to 173)  | 0.8 (0.1 to 1.5) |
|          | Male   | 1170 (1070 to 1280) | 20.6 (18.7 to 22.4) | 32 (6 to 69)    | 0.6 (0.1 to 1.2) | 0 (0 to 1)        | 0 (0 to 0)       | 42 (24 to 66) | 0.8 (0.4 to 1.2) | 131 (20 to 293) | 2.3 (0.3 to 5.2) | 75 (20 to 112)  | 1.3 (0.4 to 2)   | 196 (34 to 453) | 3.4 (0.6 to 7.8) | 646 (436 to 866) | 10.9 (7.3 to 14.6) | 68 (12 to 132)  | 1.2 (0.2 to 2.4) |
|          | Female | 475 (414 to 536)    | 7 (6.2 to 7.8)      | 17 (3 to 36)    | 0.2 (0 to 0.5)   | 0 (0 to 0)        | 0 (0 to 0)       | 20 (11 to 31) | 0.3 (0.2 to 0.5) | 69 (10 to 154)  | 1 (0.1 to 2.2)   | 40 (11 to 61)   | 0.6 (0.2 to 0.9) | 101 (21 to 232) | 1.4 (0.3 to 3.2) | 74 (39 to 114)   | 0.9 (0.5 to 1.4)   | 22 (3 to 44)    | 0.4 (0.1 to 0.7) |

|            |        |                           |                        |                        |                      |                |                     |                       |                     |                       |                     |                       |                     |                       |                      |                          |                        |                       |                     |
|------------|--------|---------------------------|------------------------|------------------------|----------------------|----------------|---------------------|-----------------------|---------------------|-----------------------|---------------------|-----------------------|---------------------|-----------------------|----------------------|--------------------------|------------------------|-----------------------|---------------------|
| France     | Both   | 26800<br>(24600 to 29000) | 21<br>(19.4 to 22.6)   | 3090<br>(1980 to 4470) | 2.4<br>(1.6 to 3.5)  | 8 (2 to 24)    | 0 (0 to 0)          | 1090<br>(611 to 1700) | 1 (0.5 to 1.5)      | 2030<br>(335 to 4550) | 1.6<br>(0.3 to 3.6) | 1760<br>(480 to 2630) | 1.4<br>(0.4 to 2.1) | 2300<br>(482 to 5340) | 1.7<br>(0.3 to 3.9)  | 12400<br>(8730 to 15900) | 8.8<br>(6.1 to 11.5)   | 1480<br>(256 to 2860) | 1.3<br>(0.2 to 2.5) |
|            | Male   | 20600<br>(18800 to 22300) | 35.4<br>(32.6 to 38.4) | 2220<br>(1400 to 3210) | 3.9<br>(2.4 to 5.6)  | 5 (1 to 14)    | 0 (0 to 0)          | 791<br>(442 to 1240)  | 1.5<br>(0.8 to 2.3) | 1460<br>(239 to 3290) | 2.5<br>(0.4 to 5.7) | 1260<br>(328 to 1880) | 2.2<br>(0.6 to 3.3) | 1730<br>(273 to 4160) | 2.9<br>(0.4 to 6.9)  | 11400<br>(7980 to 14900) | 18.6<br>(12.8 to 24.4) | 1210<br>(202 to 2350) | 2.2<br>(0.4 to 4.3) |
|            | Female | 6260<br>(5470 to 6980)    | 9.1<br>(8.1 to 10.1)   | 866<br>(547 to 1250)   | 1.2<br>(0.8 to 1.8)  | 3 (1 to 8)     | 0 (0 to 0)          | 296<br>(165 to 462)   | 0.5<br>(0.3 to 0.8) | 570<br>(97 to 1280)   | 0.8<br>(0.1 to 1.8) | 502<br>(141 to 763)   | 0.7<br>(0.2 to 1.1) | 574<br>(106 to 1420)  | 0.7<br>(0.1 to 1.8)  | 909<br>(421 to 1410)     | 1 (0.5 to 1.6)         | 268<br>(39 to 545)    | 0.5<br>(0.1 to 0.9) |
| Gabon      | Both   | 68 (45 to 99)             | 6.7<br>(4.6 to 9.6)    | 43 (23 to 73)          | 4.2<br>(2.2 to 7.1)  | 3 (1 to 7)     | 0.3<br>(0.1 to 0.7) | 5 (2 to 9)            | 0.5<br>(0.2 to 0.8) | 7 (0 to 27)           | 0.7 (0 to 2.7)      | 3 (1 to 6)            | 0.3<br>(0.1 to 0.6) | 21 (4 to 53)          | 2.2<br>(0.5 to 5.4)  | 11 (4 to 30)             | 1.3<br>(0.6 to 3.4)    | 6 (2 to 11)           | 0.4<br>(0.2 to 0.8) |
|            | Male   | 64 (43 to 94)             | 13.9<br>(9.6 to 20.1)  | 31 (16 to 54)          | 6.7<br>(3.5 to 11.3) | 2 (1 to 5)     | 0.5<br>(0.1 to 1)   | 3 (1 to 6)            | 0.7<br>(0.3 to 1.2) | 5 (0 to 20)           | 1.1<br>(0.1 to 4.5) | 2 (1 to 5)            | 0.5<br>(0.1 to 1)   | 16 (3 to 42)          | 3.8<br>(0.7 to 9.7)  | 9 (3 to 28)              | 2.6<br>(0.9 to 7.5)    | 4 (2 to 9)            | 0.7<br>(0.3 to 1.4) |
|            | Female | 4 (2 to 6)                | 0.7<br>(0.4 to 1.2)    | 11 (6 to 20)           | 2.2<br>(1.1 to 3.7)  | 1 (0 to 3)     | 0.2<br>(0.1 to 0.5) | 2 (1 to 3)            | 0.3<br>(0.1 to 0.5) | 2 (0 to 7)            | 0.4 (0 to 1.4)      | 1 (0 to 2)            | 0.2 (0 to 0.4)      | 4 (1 to 11)           | 0.9<br>(0.2 to 2.2)  | 2 (1 to 4)               | 0.4<br>(0.1 to 0.9)    | 1 (0 to 2)            | 0.2<br>(0.1 to 0.4) |
| The Gambia | Both   | 28 (21 to 35)             | 3.1<br>(2.4 to 4)      | 7 (3 to 12)            | 0.8<br>(0.3 to 1.4)  | 19 (11 to 28)  | 2.1<br>(1.3 to 3.1) | 3 (2 to 5)            | 0.4<br>(0.2 to 0.6) | 3 (0 to 12)           | 0.4 (0 to 1.3)      | 5 (2 to 8)            | 0.5<br>(0.2 to 0.9) | 5 (1 to 12)           | 0.6<br>(0.1 to 1.4)  | 2 (1 to 4)               | 0.2<br>(0.1 to 0.5)    | 3 (1 to 5)            | 0.3<br>(0.1 to 0.5) |
|            | Male   | 27 (20 to 34)             | 6.3<br>(4.9 to 8)      | 5 (2 to 9)             | 1.2<br>(0.5 to 2)    | 12 (7 to 17)   | 2.8<br>(1.6 to 4.1) | 2 (1 to 3)            | 0.4<br>(0.2 to 0.7) | 2 (0 to 8)            | 0.5 (0 to 1.8)      | 3 (1 to 5)            | 0.7<br>(0.3 to 1.2) | 3 (1 to 8)            | 0.8<br>(0.1 to 2)    | 2 (1 to 3)               | 0.4<br>(0.2 to 0.9)    | 2 (1 to 4)            | 0.4<br>(0.2 to 0.8) |
|            | Female | 1 (1 to 2)                | 0.2<br>(0.1 to 0.4)    | 2 (1 to 4)             | 0.4<br>(0.2 to 0.8)  | 7 (4 to 11)    | 1.5<br>(0.8 to 2.3) | 1 (1 to 2)            | 0.3<br>(0.1 to 0.5) | 1 (0 to 4)            | 0.2 (0 to 0.8)      | 2 (1 to 3)            | 0.4<br>(0.1 to 0.6) | 2 (0 to 5)            | 0.4<br>(0.1 to 1)    | 0 (0 to 1)               | 0.1 (0 to 0.2)         | 1 (0 to 1)            | 0.1 (0 to 0.2)      |
| Georgia    | Both   | 1270<br>(1050 to 1500)    | 21.8<br>(18 to 25.7)   | 206<br>(130 to 304)    | 3.5<br>(2.2 to 5.2)  | 92 (34 to 185) | 1.6<br>(0.6 to 3.2) | 130<br>(78 to 197)    | 2.2<br>(1.3 to 3.4) | 120 (8 to 434)        | 2.1<br>(0.1 to 7.5) | 83 (24 to 133)        | 1.4<br>(0.4 to 2.3) | 184<br>(38 to 425)    | 3.1<br>(0.6 to 7.1)  | 190<br>(102 to 304)      | 3.2<br>(1.7 to 5.1)    | 83 (39 to 137)        | 1.5<br>(0.7 to 2.4) |
|            | Male   | 1210<br>(1000 to 1500)    | 49.5<br>(41 to 58.5)   | 175<br>(111 to 239)    | 7.2<br>(4.6 to 11.8) | 73 (26 to 150) | 3 (1.1 to 6.2)      | 100<br>(60 to 154)    | 4.1<br>(2.5 to 5.7) | 101 (7 to 368)        | 4.2<br>(0.3 to 8.1) | 70 (20 to 113)        | 2.9<br>(0.8 to 5.1) | 158<br>(27 to 366)    | 6.4<br>(1.1 to 11.7) | 186<br>(99 to 300)       | 7.6<br>(4.1 to 11.1)   | 75 (34 to 125)        | 2.9<br>(1.3 to 4.5) |

|         |        |                                 |                              |                              |                           |                           |                           |                             |                           |                             |                           |                             |                           |                               |                            |                                |                            |                             |                           |
|---------|--------|---------------------------------|------------------------------|------------------------------|---------------------------|---------------------------|---------------------------|-----------------------------|---------------------------|-----------------------------|---------------------------|-----------------------------|---------------------------|-------------------------------|----------------------------|--------------------------------|----------------------------|-----------------------------|---------------------------|
|         |        | to<br>1430)                     |                              | to<br>260)                   | to<br>10.7)               |                           |                           |                             | to<br>6.3)                |                             | to<br>15.1)               |                             | to<br>4.7)                |                               | to<br>14.9)                |                                | to<br>12.2)                |                             | to<br>4.9)                |
|         | Female | 59 (44<br>to 76)                | 1.7<br>(1.3<br>to<br>2.2)    | 30 (19<br>to 45)             | 0.9<br>(0.5<br>to<br>1.3) | 19 (7<br>to 36)           | 0.5<br>(0.2<br>to 1)      | 30 (18<br>to 44)            | 0.9<br>(0.5<br>to<br>1.3) | 19 (1<br>to 69)             | 0.5 (0<br>to 2)           | 13 (4<br>to 21)             | 0.4<br>(0.1<br>to<br>0.6) | 26 (5<br>to 61)               | 0.7<br>(0.1<br>to<br>1.7)  | 4 (1 to<br>7)                  | 0.1 (0<br>to<br>0.2)       | 8 (4 to<br>14)              | 0.3<br>(0.1<br>to<br>0.4) |
| Germany | Both   | 38200<br>(35400<br>to<br>40800) | 20.6<br>(19.2<br>to<br>21.9) | 4350<br>(2800<br>to<br>6300) | 2.3<br>(1.5<br>to<br>3.4) | 5 (1 to<br>14)            | 0 (0<br>to 0)             | 1660<br>(964<br>to<br>2540) | 1 (0.6<br>to<br>1.5)      | 2850<br>(528<br>to<br>6380) | 1.5<br>(0.3<br>to<br>3.4) | 2120<br>(488<br>to<br>3230) | 1.1<br>(0.3<br>to<br>1.7) | 6790<br>(1640<br>to<br>14400) | 3.5<br>(0.8<br>to<br>7.4)  | 13300<br>(9200<br>to<br>17600) | 6.3<br>(4.3<br>to<br>8.4)  | 2280<br>(372<br>to<br>4410) | 1.4<br>(0.2<br>to<br>2.6) |
|         | Male   | 26700<br>(24600<br>to<br>28700) | 31.1<br>(28.8<br>to<br>33.4) | 2840<br>(1840<br>to<br>4110) | 3.3<br>(2.1<br>to<br>4.8) | 2 (0 to<br>8)             | 0 (0<br>to 0)             | 1110<br>(640<br>to<br>1700) | 1.4<br>(0.8<br>to<br>2.1) | 1860<br>(348<br>to<br>4140) | 2.2<br>(0.4<br>to<br>4.8) | 1380<br>(328<br>to<br>2100) | 1.6<br>(0.4<br>to<br>2.4) | 4570<br>(813<br>to<br>10400)  | 5.2<br>(0.9<br>to<br>11.7) | 12000<br>(8080<br>to<br>16100) | 13<br>(8.7<br>to<br>17.4)  | 1680<br>(260<br>to<br>3270) | 2.1<br>(0.3<br>to 4)      |
|         | Female | 11600<br>(10300<br>to<br>12700) | 11.9<br>(10.6<br>to 13)      | 1510<br>(955<br>to<br>2170)  | 1.5 (1<br>to<br>2.2)      | 2 (0 to<br>6)             | 0 (0<br>to 0)             | 553<br>(315<br>to<br>838)   | 0.7<br>(0.4<br>to 1)      | 987<br>(180<br>to<br>2220)  | 1 (0.2<br>to<br>2.2)      | 747<br>(171<br>to<br>1150)  | 0.8<br>(0.2<br>to<br>1.2) | 2230<br>(456<br>to<br>5010)   | 2.1<br>(0.4<br>to<br>4.7)  | 1300<br>(735<br>to<br>1900)    | 1.1<br>(0.6<br>to<br>1.6)  | 593<br>(86 to<br>1190)      | 0.7<br>(0.1<br>to<br>1.4) |
| Ghana   | Both   | 317<br>(242 to<br>406)          | 2.2<br>(1.7<br>to<br>2.8)    | 247<br>(144<br>to<br>373)    | 1.6 (1<br>to<br>2.5)      | 195<br>(109<br>to<br>310) | 1.3<br>(0.7<br>to 2)      | 22 (11<br>to 36)            | 0.1<br>(0.1<br>to<br>0.2) | 76 (10<br>to<br>220)        | 0.5<br>(0.1<br>to<br>1.4) | 24 (6<br>to 40)             | 0.2 (0<br>to<br>0.3)      | 112<br>(25 to<br>258)         | 0.8<br>(0.2<br>to<br>1.9)  | 38 (20<br>to 66)               | 0.3<br>(0.2<br>to<br>0.5)  | 75 (34<br>to<br>129)        | 0.4<br>(0.2<br>to<br>0.7) |
|         | Male   | 287<br>(220 to<br>370)          | 4.7<br>(3.6<br>to<br>5.9)    | 179<br>(102<br>to<br>274)    | 2.8<br>(1.6<br>to<br>4.2) | 124<br>(66 to<br>205)     | 1.9 (1<br>to<br>3.2)      | 15 (7<br>to 24)             | 0.2<br>(0.1<br>to<br>0.3) | 52 (7<br>to<br>151)         | 0.8<br>(0.1<br>to<br>2.3) | 16 (4<br>to 27)             | 0.2<br>(0.1<br>to<br>0.4) | 81 (14<br>to<br>193)          | 1.4<br>(0.2<br>to<br>3.3)  | 33 (17<br>to 59)               | 0.6<br>(0.3<br>to<br>1.1)  | 53 (22<br>to 96)            | 0.6<br>(0.3<br>to<br>1.1) |
|         | Female | 30 (20<br>to 43)                | 0.4<br>(0.3<br>to<br>0.6)    | 67 (38<br>to<br>107)         | 0.8<br>(0.4<br>to<br>1.3) | 71 (41<br>to<br>111)      | 0.8<br>(0.5<br>to<br>1.3) | 8 (4 to<br>13)              | 0.1 (0<br>to<br>0.1)      | 24 (3<br>to 69)             | 0.3 (0<br>to<br>0.8)      | 9 (2 to<br>15)              | 0.1 (0<br>to<br>0.2)      | 31 (6<br>to 77)               | 0.4<br>(0.1<br>to 1)       | 4 (2 to<br>9)                  | 0.1 (0<br>to<br>0.1)       | 22 (9<br>to 41)             | 0.2<br>(0.1<br>to<br>0.4) |
| Greece  | Both   | 6960<br>(6450<br>to<br>7420)    | 30.4<br>(28.4<br>to<br>32.3) | 873<br>(585<br>to<br>1230)   | 3.8<br>(2.5<br>to<br>5.3) | 6 (1 to<br>15)            | 0 (0<br>to 0.1)           | 467<br>(277<br>to<br>694)   | 2.2<br>(1.3<br>to<br>3.2) | 669<br>(112<br>to<br>1480)  | 2.9<br>(0.5<br>to<br>6.4) | 96 (26<br>to<br>167)        | 0.4<br>(0.1<br>to<br>0.7) | 823<br>(169<br>to<br>1850)    | 3.4<br>(0.7<br>to<br>7.7)  | 1020<br>(604<br>to<br>1530)    | 3.9<br>(2.3<br>to<br>5.9)  | 217<br>(38 to<br>422)       | 1.1<br>(0.2<br>to<br>2.1) |
|         | Male   | 5710<br>(5300<br>to<br>6120)    | 54<br>(50.3<br>to<br>57.6)   | 684<br>(460<br>to<br>961)    | 6.5<br>(4.3<br>to<br>9.1) | 4 (1 to<br>10)            | 0 (0<br>to 0.1)           | 355<br>(207<br>to<br>533)   | 3.6<br>(2.1<br>to<br>5.3) | 524<br>(89 to<br>1160)      | 5 (0.8<br>to<br>10.9)     | 70 (19<br>to<br>128)        | 0.6<br>(0.2<br>to<br>1.2) | 674<br>(117<br>to<br>1570)    | 6.1 (1<br>to<br>14.4)      | 967<br>(556<br>to<br>1460)     | 8.2<br>(4.7<br>to<br>12.5) | 188<br>(32 to<br>366)       | 2 (0.3<br>to<br>3.9)      |
|         | Female | 1240<br>(1100<br>to<br>1370)    | 10.3<br>(9.2<br>to<br>11.2)  | 189<br>(125<br>to<br>263)    | 1.5 (1<br>to<br>2.1)      | 2 (0 to<br>4)             | 0 (0<br>to 0)             | 112<br>(68 to<br>169)       | 1 (0.6<br>to<br>1.5)      | 145<br>(24 to<br>321)       | 1.2<br>(0.2<br>to<br>2.6) | 26 (6<br>to 46)             | 0.2 (0<br>to<br>0.3)      | 149<br>(28 to<br>347)         | 1.1<br>(0.2<br>to<br>2.5)  | 55 (20<br>to<br>122)           | 0.4<br>(0.1<br>to<br>0.9)  | 29 (4<br>to 59)             | 0.3 (0<br>to<br>0.6)      |

|           |        |                  |                     |                 |                  |                 |                  |              |                  |               |                   |               |                  |                 |                   |              |                     |               |                  |
|-----------|--------|------------------|---------------------|-----------------|------------------|-----------------|------------------|--------------|------------------|---------------|-------------------|---------------|------------------|-----------------|-------------------|--------------|---------------------|---------------|------------------|
| Greenland | Both   | 41 (33 to 48)    | 59.8 (48.8 to 70.9) | 2 (0 to 5)      | 2.3 (0.2 to 6.9) | 0 (0 to 0)      | 0.1 (0 to 0.4)   | 3 (2 to 5)   | 4.4 (2.4 to 7.1) | 4 (0 to 11)   | 5.8 (0.5 to 16.6) | 2 (0 to 3)    | 2.5 (0.6 to 4)   | 4 (1 to 9)      | 6.2 (1.3 to 14)   | 10 (6 to 14) | 16.3 (10.6 to 22.4) | 2 (0 to 5)    | 3 (0.6 to 5.8)   |
|           | Male   | 25 (20 to 31)    | 70.9 (56.5 to 84.2) | 1 (0 to 3)      | 2.7 (0.2 to 7.9) | 0 (0 to 0)      | 0.1 (0 to 0.4)   | 2 (1 to 3)   | 5.7 (3 to 9.1)   | 2 (0 to 7)    | 6.7 (0.6 to 19.1) | 1 (0 to 2)    | 2.8 (0.6 to 4.8) | 3 (0 to 7)      | 8.5 (1.4 to 20.3) | 8 (5 to 12)  | 28.1 (18.4 to 38.6) | 2 (0 to 3)    | 3.8 (0.7 to 7.5) |
|           | Female | 15 (12 to 19)    | 48 (38.5 to 59.1)   | 1 (0 to 2)      | 1.9 (0.2 to 5.5) | 0 (0 to 0)      | 0.1 (0 to 0.4)   | 1 (1 to 2)   | 3 (1.6 to 4.8)   | 2 (0 to 4)    | 4.8 (0.4 to 13.8) | 1 (0 to 1)    | 2.1 (0.5 to 3.5) | 1 (0 to 3)      | 3.7 (0.7 to 9.6)  | 1 (1 to 3)   | 4.7 (2.4 to 8.2)    | 1 (0 to 1)    | 2 (0.4 to 4)     |
| Grenada   | Both   | 7 (6 to 8)       | 6.1 (5.3 to 7)      | 2 (1 to 4)      | 2.1 (0.8 to 3.7) | 0 (0 to 0)      | 0.1 (0 to 0.2)   | 0 (0 to 1)   | 0.4 (0.2 to 0.6) | 0 (0 to 2)    | 0.4 (0 to 1.5)    | 0 (0 to 1)    | 0.4 (0.1 to 0.6) | 2 (1 to 5)      | 2.1 (0.5 to 4.4)  | 1 (0 to 1)   | 0.7 (0.4 to 1)      | 1 (1 to 2)    | 1 (0.5 to 1.6)   |
|           | Male   | 6 (5 to 7)       | 11.2 (9.8 to 12.7)  | 2 (1 to 3)      | 3.1 (1.2 to 5.4) | 0 (0 to 0)      | 0.1 (0 to 0.2)   | 0 (0 to 0)   | 0.5 (0.3 to 0.9) | 0 (0 to 1)    | 0.6 (0 to 2.3)    | 0 (0 to 0)    | 0.5 (0.1 to 0.8) | 2 (0 to 4)      | 3.3 (0.6 to 7.1)  | 1 (0 to 1)   | 1.3 (0.7 to 2)      | 1 (0 to 2)    | 1.5 (0.7 to 2.5) |
|           | Female | 1 (1 to 1)       | 1.8 (1.4 to 2.3)    | 1 (0 to 1)      | 1.3 (0.5 to 2.3) | 0 (0 to 0)      | 0.1 (0 to 0.2)   | 0 (0 to 0)   | 0.2 (0.1 to 0.4) | 0 (0 to 1)    | 0.2 (0 to 0.9)    | 0 (0 to 0)    | 0.2 (0.1 to 0.4) | 1 (0 to 2)      | 1.2 (0.2 to 2.7)  | 0 (0 to 0)   | 0.3 (0.2 to 0.5)    | 0 (0 to 1)    | 0.5 (0.2 to 0.8) |
| Guam      | Both   | 32 (25 to 39)    | 16.8 (13.5 to 20.4) | 3 (1 to 5)      | 1.6 (0.6 to 2.8) | 0 (0 to 1)      | 0.2 (0 to 0.6)   | 4 (2 to 6)   | 2 (1.1 to 3.3)   | 2 (0 to 7)    | 0.9 (0.1 to 3.5)  | 2 (0 to 3)    | 0.9 (0.2 to 1.5) | 6 (1 to 14)     | 3.4 (0.8 to 7.5)  | 3 (2 to 5)   | 1.6 (0.9 to 2.7)    | 2 (1 to 4)    | 1.1 (0.5 to 1.9) |
|           | Male   | 24 (19 to 29)    | 26.7 (21.6 to 32.5) | 2 (1 to 4)      | 2.2 (0.8 to 4)   | 0 (0 to 1)      | 0.3 (0 to 0.8)   | 2 (1 to 4)   | 2.8 (1.5 to 4.6) | 1 (0 to 4)    | 1.3 (0.1 to 5)    | 1 (0 to 2)    | 1.2 (0.3 to 2.1) | 4 (1 to 10)     | 4.9 (0.8 to 11.4) | 3 (2 to 5)   | 3.7 (2.1 to 6)      | 2 (1 to 3)    | 1.7 (0.7 to 2.9) |
|           | Female | 8 (6 to 10)      | 8 (6.1 to 10.3)     | 1 (0 to 2)      | 1 (0.4 to 1.9)   | 0 (0 to 1)      | 0.2 (0 to 0.5)   | 1 (1 to 2)   | 1.4 (0.7 to 2.3) | 1 (0 to 2)    | 0.6 (0 to 2.2)    | 1 (0 to 1)    | 0.6 (0.1 to 1)   | 2 (0 to 5)      | 2.1 (0.4 to 5.2)  | 0 (0 to 0)   | 0 (0 to 0.1)        | 1 (0 to 1)    | 0.6 (0.3 to 1)   |
| Guatemala | Both   | 294 (219 to 381) | 2.8 (2.1 to 3.6)    | 100 (52 to 158) | 0.9 (0.5 to 1.5) | 132 (74 to 206) | 1.2 (0.7 to 1.9) | 18 (8 to 31) | 0.2 (0.1 to 0.3) | 46 (3 to 167) | 0.4 (0 to 1.6)    | 38 (10 to 62) | 0.4 (0.1 to 0.6) | 114 (27 to 254) | 1.1 (0.3 to 2.4)  | 15 (8 to 26) | 0.2 (0.1 to 0.3)    | 56 (26 to 94) | 0.5 (0.2 to 0.8) |
|           | Male   | 247 (183 to 322) | 5.3 (4 to 6.8)      | 64 (34 to 103)  | 1.4 (0.7 to 2.3) | 72 (38 to 115)  | 1.5 (0.8 to 2.3) | 10 (5 to 18) | 0.2 (0.1 to 0.3) | 28 (2 to 99)  | 0.6 (0 to 2.1)    | 23 (6 to 36)  | 0.5 (0.1 to 0.6) | 71 (13 to 165)  | 1.5 (0.3 to 2.4)  | 13 (6 to 23) | 0.3 (0.2 to 0.3)    | 41 (18 to 71) | 0.8 (0.3 to 0.8) |

|               |        |                  |                   |               |                  |                  |                   |              |                  |              |                  |              |                  |               |                  |              |                  |              |                  |
|---------------|--------|------------------|-------------------|---------------|------------------|------------------|-------------------|--------------|------------------|--------------|------------------|--------------|------------------|---------------|------------------|--------------|------------------|--------------|------------------|
|               |        |                  |                   |               | to<br>2.2)       |                  | to<br>2.4)        |              | to<br>0.4)       |              |                  |              | to<br>0.8)       |               | to<br>3.5)       |              | to<br>0.6)       |              | to<br>1.4)       |
|               | Female | 47 (32 to 65)    | 0.8 (0.6 to 1.2)  | 35 (18 to 57) | 0.6 (0.3 to 1)   | 60 (36 to 90)    | 1 (0.6 to 1.5)    | 7 (3 to 13)  | 0.1 (0.1 to 0.2) | 19 (1 to 68) | 0.3 (0 to 1.1)   | 16 (4 to 25) | 0.3 (0.1 to 0.4) | 44 (9 to 100) | 0.8 (0.2 to 1.7) | 2 (1 to 5)   | 0 (0 to 0.1)     | 15 (6 to 26) | 0.2 (0.1 to 0.4) |
| Guinea        | Both   | 263 (198 to 341) | 5 (3.8 to 6.4)    | 36 (13 to 72) | 0.7 (0.3 to 1.3) | 171 (105 to 258) | 3.2 (2 to 4.8)    | 17 (8 to 28) | 0.3 (0.2 to 0.5) | 26 (2 to 97) | 0.5 (0 to 1.8)   | 20 (5 to 34) | 0.4 (0.1 to 0.6) | 36 (7 to 87)  | 0.7 (0.2 to 1.8) | 14 (6 to 28) | 0.3 (0.1 to 0.6) | 21 (9 to 39) | 0.3 (0.1 to 0.6) |
|               | Male   | 253 (190 to 328) | 9.5 (7.2 to 12.2) | 30 (11 to 60) | 1.1 (0.4 to 2.2) | 131 (80 to 199)  | 4.9 (3 to 7.4)    | 12 (6 to 21) | 0.5 (0.2 to 0.7) | 20 (2 to 76) | 0.8 (0.1 to 2.8) | 16 (4 to 27) | 0.6 (0.1 to 1)   | 28 (5 to 69)  | 1.1 (0.2 to 2.8) | 12 (5 to 26) | 0.5 (0.2 to 1)   | 18 (7 to 34) | 0.6 (0.2 to 1.1) |
|               | Female | 11 (6 to 15)     | 0.4 (0.3 to 0.6)  | 6 (2 to 13)   | 0.2 (0.1 to 0.5) | 40 (24 to 62)    | 1.5 (0.9 to 2.4)  | 5 (2 to 8)   | 0.2 (0.1 to 0.3) | 6 (0 to 21)  | 0.2 (0 to 0.8)   | 5 (1 to 8)   | 0.2 (0 to 0.3)   | 8 (1 to 20)   | 0.3 (0.1 to 0.8) | 1 (0 to 3)   | 0.1 (0 to 0.1)   | 3 (1 to 7)   | 0.1 (0 to 0.2)   |
| Guinea-Bissau | Both   | 22 (13 to 34)    | 3.3 (2 to 5)      | 7 (2 to 14)   | 1 (0.4 to 2.1)   | 27 (14 to 43)    | 4 (2.2 to 6.4)    | 3 (1 to 5)   | 0.4 (0.2 to 0.7) | 4 (0 to 16)  | 0.6 (0 to 2.3)   | 5 (1 to 8)   | 0.7 (0.2 to 1.3) | 6 (1 to 16)   | 1.1 (0.2 to 2.6) | 3 (1 to 6)   | 0.5 (0.2 to 1)   | 4 (2 to 8)   | 0.5 (0.2 to 1)   |
|               | Male   | 21 (12 to 33)    | 7 (4.3 to 10.8)   | 5 (2 to 12)   | 1.8 (0.6 to 3.9) | 19 (10 to 33)    | 6.6 (3.4 to 11.1) | 2 (1 to 4)   | 0.6 (0.3 to 1.2) | 3 (0 to 12)  | 1 (0.1 to 4.1)   | 3 (1 to 7)   | 1.2 (0.3 to 2.2) | 5 (1 to 13)   | 1.8 (0.3 to 4.9) | 3 (1 to 6)   | 1.1 (0.5 to 2.2) | 3 (1 to 7)   | 0.9 (0.3 to 1.8) |
|               | Female | 1 (1 to 1)       | 0.3 (0.2 to 0.4)  | 1 (1 to 3)    | 0.4 (0.1 to 0.7) | 7 (5 to 11)      | 2 (1.3 to 3)      | 1 (0 to 2)   | 0.2 (0.1 to 0.4) | 1 (0 to 4)   | 0.3 (0 to 1)     | 1 (0 to 2)   | 0.3 (0.1 to 0.6) | 2 (0 to 4)    | 0.5 (0.1 to 1.2) | 0 (0 to 1)   | 0.1 (0 to 0.2)   | 1 (0 to 2)   | 0.2 (0.1 to 0.4) |
| Guyana        | Both   | 22 (17 to 28)    | 3.6 (2.7 to 4.5)  | 7 (3 to 14)   | 1.2 (0.4 to 2.2) | 1 (0 to 2)       | 0.1 (0.1 to 0.3)  | 2 (1 to 3)   | 0.3 (0.2 to 0.5) | 2 (0 to 6)   | 0.2 (0 to 1)     | 3 (1 to 4)   | 0.4 (0.1 to 0.7) | 8 (2 to 18)   | 1.3 (0.3 to 3)   | 3 (1 to 5)   | 0.5 (0.3 to 0.8) | 4 (2 to 7)   | 0.5 (0.3 to 0.9) |
|               | Male   | 18 (14 to 24)    | 6.4 (4.9 to 8.1)  | 5 (2 to 9)    | 1.6 (0.6 to 3)   | 0 (0 to 1)       | 0.2 (0.1 to 0.3)  | 1 (1 to 2)   | 0.4 (0.2 to 0.7) | 1 (0 to 4)   | 0.3 (0 to 1.3)   | 2 (1 to 3)   | 0.6 (0.2 to 1)   | 5 (1 to 12)   | 1.9 (0.3 to 4.3) | 2 (1 to 4)   | 0.8 (0.4 to 1.5) | 3 (1 to 5)   | 0.9 (0.4 to 1.5) |
|               | Female | 4 (3 to 5)       | 1.2 (0.9 to 1.6)  | 3 (1 to 5)    | 0.8 (0.3 to 1.5) | 0 (0 to 1)       | 0.1 (0.1 to 0.3)  | 1 (0 to 1)   | 0.2 (0.1 to 0.4) | 1 (0 to 2)   | 0.2 (0 to 0.7)   | 1 (0 to 2)   | 0.3 (0.1 to 0.5) | 3 (1 to 7)    | 0.9 (0.2 to 2.1) | 1 (0 to 1)   | 0.2 (0.1 to 0.4) | 1 (0 to 2)   | 0.3 (0.1 to 0.5) |



|          |        |                        |                        |                       |                      |                     |                     |                     |                     |                      |                      |                     |                     |                      |                     |                     |                     |                    |                     |
|----------|--------|------------------------|------------------------|-----------------------|----------------------|---------------------|---------------------|---------------------|---------------------|----------------------|----------------------|---------------------|---------------------|----------------------|---------------------|---------------------|---------------------|--------------------|---------------------|
| Haiti    | Both   | 217<br>(128 to 389)    | 3.3<br>(1.9 to 5.8)    | 38 (12 to 90)         | 0.6<br>(0.2 to 1.4)  | 221<br>(121 to 379) | 3.3<br>(1.9 to 5.7) | 15 (6 to 31)        | 0.2<br>(0.1 to 0.4) | 22 (2 to 80)         | 0.3 (0 to 1.2)       | 34 (8 to 67)        | 0.5<br>(0.1 to 1)   | 93 (20 to 235)       | 1.5<br>(0.3 to 3.8) | 57 (20 to 123)      | 1 (0.4 to 2.2)      | 45 (18 to 91)      | 0.6<br>(0.2 to 1.2) |
|          | Male   | 192<br>(108 to 363)    | 6.1<br>(3.5 to 11.4)   | 30 (8 to 75)          | 1 (0.3 to 2.4)       | 151<br>(76 to 295)  | 4.9<br>(2.5 to 9.6) | 11 (4 to 23)        | 0.3<br>(0.1 to 0.7) | 15 (1 to 57)         | 0.5 (0 to 1.9)       | 24 (5 to 52)        | 0.8<br>(0.2 to 1.7) | 63 (10 to 182)       | 2.2<br>(0.3 to 6.3) | 51 (17 to 115)      | 2 (0.7 to 4.3)      | 33 (11 to 75)      | 0.9<br>(0.3 to 2)   |
|          | Female | 25 (16 to 38)          | 0.7<br>(0.5 to 1.1)    | 9 (3 to 20)           | 0.2<br>(0.1 to 0.5)  | 70 (42 to 106)      | 1.9<br>(1.2 to 2.9) | 4 (2 to 8)          | 0.1<br>(0.1 to 0.2) | 6 (0 to 24)          | 0.2 (0 to 0.7)       | 10 (3 to 18)        | 0.3<br>(0.1 to 0.5) | 30 (6 to 72)         | 0.9<br>(0.2 to 2.1) | 6 (2 to 16)         | 0.2 (0 to 0.5)      | 11 (4 to 23)       | 0.3<br>(0.1 to 0.5) |
| Honduras | Both   | 529<br>(330 to 762)    | 9.2<br>(5.7 to 13.1)   | 112<br>(51 to 210)    | 1.9<br>(0.9 to 3.6)  | 250<br>(131 to 400) | 4.3<br>(2.3 to 6.8) | 57 (25 to 101)      | 1 (0.4 to 1.7)      | 68 (5 to 242)        | 1.2<br>(0.1 to 4.2)  | 56 (14 to 100)      | 1 (0.2 to 1.7)      | 166<br>(37 to 407)   | 3 (0.7 to 7.2)      | 80 (42 to 142)      | 1.5<br>(0.8 to 2.6) | 100<br>(39 to 188) | 1.5<br>(0.6 to 2.9) |
|          | Male   | 354<br>(213 to 507)    | 13.1<br>(8 to 18.8)    | 53 (24 to 94)         | 2 (0.9 to 3.5)       | 93 (44 to 152)      | 3.4<br>(1.6 to 5.5) | 22 (10 to 39)       | 0.8<br>(0.3 to 1.4) | 28 (2 to 103)        | 1 (0.1 to 3.8)       | 23 (5 to 41)        | 0.8<br>(0.2 to 1.5) | 76 (13 to 199)       | 2.9<br>(0.5 to 7.5) | 52 (25 to 92)       | 2 (1 to 3.6)        | 51 (18 to 98)      | 1.7<br>(0.6 to 3.2) |
|          | Female | 176<br>(99 to 278)     | 5.7<br>(3.3 to 9)      | 58 (26 to 115)        | 1.9<br>(0.8 to 3.7)  | 157<br>(78 to 258)  | 5.1<br>(2.6 to 8.3) | 35 (14 to 65)       | 1.1<br>(0.5 to 2.1) | 40 (3 to 145)        | 1.3<br>(0.1 to 4.7)  | 33 (9 to 63)        | 1.1<br>(0.3 to 2)   | 90 (17 to 242)       | 3 (0.6 to 8.1)      | 28 (9 to 58)        | 1 (0.3 to 2)        | 49 (17 to 103)     | 1.4<br>(0.5 to 3)   |
| Hungary  | Both   | 6690<br>(5470 to 8130) | 35.8<br>(29.2 to 43.4) | 1040<br>(704 to 1450) | 5.6<br>(3.8 to 7.8)  | 192<br>(49 to 460)  | 1 (0.3 to 2.5)      | 629<br>(357 to 989) | 3.4<br>(1.9 to 5.4) | 654<br>(103 to 1580) | 3.5<br>(0.6 to 8.5)  | 396<br>(113 to 628) | 2.1<br>(0.6 to 3.4) | 953<br>(218 to 2140) | 4.9<br>(1.1 to 11)  | 488<br>(270 to 781) | 2.4<br>(1.3 to 3.9) | 365<br>(55 to 740) | 2.1<br>(0.3 to 4.2) |
|          | Male   | 4420<br>(3590 to 5390) | 55.9<br>(45.5 to 68.3) | 643<br>(432 to 901)   | 8.2<br>(5.5 to 11.5) | 99 (24 to 240)      | 1.3<br>(0.3 to 3.1) | 374<br>(213 to 602) | 4.8<br>(2.7 to 7.7) | 401<br>(64 to 978)   | 5.1<br>(0.8 to 12.5) | 241<br>(65 to 383)  | 3.1<br>(0.8 to 4.9) | 640<br>(109 to 1510) | 8 (1.4 to 19)       | 404<br>(207 to 681) | 4.9<br>(2.5 to 8.3) | 245<br>(35 to 498) | 3.1<br>(0.4 to 6.2) |
|          | Female | 2270<br>(1840 to 2780) | 21.6<br>(17.4 to 26.4) | 395<br>(265 to 560)   | 3.7<br>(2.5 to 5.2)  | 93 (26 to 224)      | 0.9<br>(0.2 to 2.1) | 254<br>(144 to 399) | 2.5<br>(1.4 to 3.9) | 252<br>(39 to 613)   | 2.4<br>(0.4 to 5.7)  | 155<br>(44 to 245)  | 1.5<br>(0.4 to 2.3) | 313<br>(60 to 756)   | 2.7<br>(0.5 to 6.5) | 84 (45 to 142)      | 0.7<br>(0.4 to 1.2) | 120<br>(15 to 252) | 1.2<br>(0.2 to 2.6) |
| Iceland  | Both   | 100<br>(88 to 112)     | 18<br>(15.9 to 20.2)   | 3 (1 to 7)            | 0.5<br>(0.1 to 1.2)  | 0 (0 to 0)          | 0 (0 to 0)          | 7 (4 to 10)         | 1.3<br>(0.8 to 1.9) | 2 (0 to 4)           | 0.3 (0 to 0.8)       | 6 (2 to 9)          | 1.1<br>(0.3 to 1.7) | 13 (3 to 28)         | 2.2<br>(0.5 to 4.9) | 30 (21 to 39)       | 5.1<br>(3.6 to 6.8) | 6 (1 to 12)        | 1.2<br>(0.2 to 2.3) |
|          | Male   | 56 (50 to 63)          | 21.3<br>(18.9)         | 2 (0 to 3)            | 0.6<br>(0.1)         | 0 (0 to 0)          | 0 (0 to 0)          | 4 (2 to 6)          | 1.5<br>(0.9)        | 1 (0 to 2)           | 0.3 (0 to 0.8)       | 3 (1 to 5)          | 1.2<br>(0.3)        | 7 (1 to 17)          | 2.7<br>(0.4)        | 26 (18 to 35)       | 9.7<br>(6.6 to 13)  | 4 (1 to 8)         | 1.5<br>(0.3 to 3)   |

|           |        |                        |                     |                        |                  |                      |                  |                     |                  |                    |                  |                     |                  |                      |                  |                     |                  |                     |                  |
|-----------|--------|------------------------|---------------------|------------------------|------------------|----------------------|------------------|---------------------|------------------|--------------------|------------------|---------------------|------------------|----------------------|------------------|---------------------|------------------|---------------------|------------------|
|           |        |                        | to<br>23.9)         |                        | to<br>1.3)       |                      |                  |                     | to<br>2.2)       |                    |                  |                     | to<br>1.8)       |                      | to<br>6.3)       |                     |                  |                     |                  |
|           | Female | 43 (37 to 49)          | 14.9 (12.8 to 17)   | 1 (0 to 3)             | 0.5 (0.1 to 1.1) | 0 (0 to 0)           | 0 (0 to 0)       | 3 (2 to 4)          | 1.1 (0.6 to 1.6) | 1 (0 to 2)         | 0.3 (0 to 0.7)   | 3 (1 to 5)          | 1 (0.3 to 1.5)   | 5 (1 to 13)          | 1.7 (0.3 to 4.1) | 3 (2 to 5)          | 1.1 (0.6 to 1.7) | 2 (0 to 4)          | 0.8 (0.1 to 1.6) |
| India     | Both   | 41000 (33100 to 50100) | 3.8 (3.1 to 4.6)    | 19000 (13100 to 25500) | 1.7 (1.2 to 2.3) | 9150 (5370 to 13800) | 0.8 (0.5 to 1.2) | 4320 (2310 to 6850) | 0.4 (0.2 to 0.6) | 3970 (832 to 8230) | 0.4 (0.1 to 0.7) | 5880 (2220 to 9120) | 0.5 (0.2 to 0.8) | 8860 (1980 to 20200) | 0.8 (0.2 to 1.9) | 4920 (2920 to 7810) | 0.5 (0.3 to 0.8) | 5900 (2780 to 9520) | 0.5 (0.2 to 0.8) |
|           | Male   | 37000 (29100 to 45500) | 7.1 (5.6 to 8.7)    | 13700 (9160 to 18900)  | 2.6 (1.7 to 3.5) | 5910 (3230 to 9230)  | 1.1 (0.6 to 1.7) | 2590 (1330 to 4220) | 0.5 (0.3 to 0.8) | 2780 (553 to 5770) | 0.5 (0.1 to 1.1) | 4110 (1500 to 6570) | 0.8 (0.3 to 1.2) | 6470 (1160 to 15500) | 1.2 (0.2 to 3)   | 4380 (2460 to 7150) | 1 (0.5 to 1.5)   | 5190 (2380 to 8500) | 0.8 (0.4 to 1.4) |
|           | Female | 3990 (2950 to 5210)    | 0.7 (0.6 to 1)      | 5250 (3460 to 7250)    | 0.9 (0.6 to 1.3) | 3240 (1880 to 4940)  | 0.6 (0.3 to 0.9) | 1730 (911 to 2760)  | 0.3 (0.2 to 0.5) | 1190 (234 to 2490) | 0.2 (0 to 0.4)   | 1770 (667 to 2860)  | 0.3 (0.1 to 0.5) | 2400 (480 to 5810)   | 0.4 (0.1 to 1)   | 544 (270 to 976)    | 0.1 (0.1 to 0.2) | 705 (293 to 1220)   | 0.1 (0 to 0.2)   |
| Indonesia | Both   | 27900 (21100 to 35700) | 14 (10.7 to 17.6)   | 5670 (3490 to 8390)    | 2.8 (1.7 to 4.2) | 3710 (1760 to 6470)  | 1.8 (0.9 to 3.2) | 2590 (1250 to 4370) | 1.3 (0.6 to 2.1) | 970 (174 to 2270)  | 0.5 (0.1 to 1.1) | 2260 (682 to 3710)  | 1.1 (0.3 to 1.8) | 3440 (702 to 8310)   | 1.8 (0.4 to 4.4) | 1370 (758 to 2250)  | 0.8 (0.5 to 1.4) | 3290 (1570 to 5430) | 1.3 (0.6 to 2.2) |
|           | Male   | 25600 (18900 to 33600) | 27.7 (21 to 35.4)   | 3990 (2400 to 5990)    | 4.2 (2.6 to 6.3) | 2300 (998 to 4180)   | 2.4 (1.1 to 4.4) | 1180 (598 to 1950)  | 1.3 (0.6 to 2.1) | 662 (123 to 1610)  | 0.7 (0.1 to 1.7) | 1540 (463 to 2650)  | 1.6 (0.5 to 2.8) | 2430 (401 to 6120)   | 2.8 (0.5 to 7.1) | 1240 (660 to 2080)  | 1.8 (0.9 to 3)   | 2510 (1130 to 4450) | 2.1 (0.9 to 3.6) |
|           | Female | 2290 (1200 to 3550)    | 2.4 (1.3 to 3.6)    | 1690 (803 to 2960)     | 1.6 (0.8 to 2.8) | 1410 (550 to 2700)   | 1.3 (0.5 to 2.6) | 1410 (569 to 2650)  | 1.3 (0.5 to 2.4) | 308 (49 to 791)    | 0.3 (0 to 0.7)   | 723 (191 to 1380)   | 0.7 (0.2 to 1.3) | 1010 (166 to 2980)   | 1 (0.2 to 3)     | 131 (51 to 269)     | 0.2 (0.1 to 0.3) | 783 (277 to 1540)   | 0.6 (0.2 to 1.2) |
| Iran      | Both   | 4730 (4310 to 5200)    | 6.9 (6.3 to 7.6)    | 1970 (1490 to 2490)    | 2.8 (2.1 to 3.6) | 4 (1 to 9)           | 0 (0 to 0)       | 577 (342 to 862)    | 0.8 (0.5 to 1.2) | 439 (84 to 883)    | 0.6 (0.1 to 1.3) | 108 (32 to 169)     | 0.2 (0 to 0.2)   | 906 (211 to 1940)    | 1.4 (0.3 to 3)   | 97 (53 to 176)      | 0.2 (0.1 to 0.3) | 397 (193 to 633)    | 0.5 (0.2 to 0.8) |
|           | Male   | 4230 (3840 to 4680)    | 12.4 (11.2 to 13.6) | 1360 (1020 to 1740)    | 3.9 (3 to 5)     | 2 (1 to 5)           | 0 (0 to 0)       | 359 (212 to 542)    | 1 (0.6 to 1.6)   | 303 (59 to 614)    | 0.9 (0.2 to 1.8) | 71 (21 to 115)      | 0.2 (0.1 to 0.3) | 610 (105 to 1400)    | 1.8 (0.3 to 4.2) | 87 (45 to 164)      | 0.3 (0.1 to 0.5) | 369 (176 to 591)    | 0.9 (0.4 to 1.5) |
|           | Female | 498 (406 to 597)       | 1.4 (1.2 to 1.7)    | 612 (450 to 776)       | 1.8 (1.3 to 2.3) | 2 (1 to 3)           | 0 (0 to 0)       | 218 (130 to 320)    | 0.6 (0.4 to 0.9) | 136 (26 to 276)    | 0.4 (0.1 to 0.8) | 37 (11 to 61)       | 0.1 (0 to 0.2)   | 296 (63 to 679)      | 0.9 (0.2 to 2.1) | 9 (5 to 16)         | 0 (0 to 0.1)     | 28 (12 to 48)       | 0.1 (0 to 0.1)   |

|         |        |                           |                        |                        |                      |              |            |                        |                     |                       |                     |                      |                     |                       |                     |                          |                      |                       |                     |
|---------|--------|---------------------------|------------------------|------------------------|----------------------|--------------|------------|------------------------|---------------------|-----------------------|---------------------|----------------------|---------------------|-----------------------|---------------------|--------------------------|----------------------|-----------------------|---------------------|
| Iraq    | Both   | 2760<br>(2120 to 3360)    | 13.3<br>(10.5 to 15.9) | 1070<br>(709 to 1450)  | 5 (3.4 to 6.8)       | 2 (1 to 5)   | 0 (0 to 0) | 350<br>(204 to 547)    | 1.6 (1 to 2.6)      | 151<br>(13 to 629)    | 0.7<br>(0.1 to 3)   | 182<br>(50 to 293)   | 0.8<br>(0.2 to 1.4) | 526<br>(115 to 1180)  | 2.6<br>(0.6 to 5.8) | 253<br>(128 to 447)      | 1.5<br>(0.8 to 2.5)  | 220<br>(98 to 388)    | 0.8<br>(0.4 to 1.5) |
|         | Male   | 2470<br>(1880 to 3000)    | 25<br>(19.6 to 29.8)   | 785<br>(526 to 1070)   | 7.8<br>(5.3 to 10.5) | 2 (1 to 4)   | 0 (0 to 0) | 237<br>(136 to 375)    | 2.4<br>(1.4 to 3.7) | 111<br>(10 to 459)    | 1.1<br>(0.1 to 4.6) | 132<br>(34 to 216)   | 1.3<br>(0.3 to 2.1) | 388<br>(68 to 908)    | 4.1<br>(0.7 to 9.5) | 241<br>(119 to 434)      | 3.1<br>(1.6 to 5.3)  | 211<br>(93 to 375)    | 1.6<br>(0.7 to 2.9) |
|         | Female | 292<br>(214 to 385)       | 2.8 (2 to 3.6)         | 283<br>(187 to 400)    | 2.5<br>(1.7 to 3.5)  | 1 (0 to 2)   | 0 (0 to 0) | 113<br>(65 to 180)     | 1 (0.6 to 1.5)      | 40 (3 to 165)         | 0.4 (0 to 1.4)      | 49 (13 to 82)        | 0.4<br>(0.1 to 0.7) | 138<br>(30 to 329)    | 1.3<br>(0.3 to 3.1) | 12 (6 to 24)             | 0.1<br>(0.1 to 0.2)  | 9 (3 to 16)           | 0.1 (0 to 0.1)      |
| Ireland | Both   | 1540<br>(1390 to 1670)    | 20.1<br>(18.2 to 21.9) | 93 (44 to 154)         | 1.2<br>(0.6 to 2)    | 0 (0 to 1)   | 0 (0 to 0) | 74 (43 to 115)         | 1 (0.6 to 1.5)      | 161<br>(27 to 354)    | 2.1<br>(0.4 to 4.6) | 82 (20 to 123)       | 1.1<br>(0.3 to 1.6) | 202<br>(48 to 437)    | 2.6<br>(0.6 to 5.6) | 386<br>(245 to 541)      | 4.9<br>(3.1 to 6.9)  | 67 (12 to 130)        | 0.9<br>(0.2 to 1.7) |
|         | Male   | 886<br>(793 to 974)       | 24.9<br>(22.3 to 27.3) | 51 (25 to 87)          | 1.4<br>(0.7 to 2.4)  | 0 (0 to 1)   | 0 (0 to 0) | 43 (24 to 67)          | 1.2<br>(0.7 to 1.9) | 89 (15 to 201)        | 2.5<br>(0.4 to 5.7) | 45 (11 to 68)        | 1.3<br>(0.3 to 1.9) | 124<br>(20 to 287)    | 3.4<br>(0.6 to 8)   | 352<br>(221 to 492)      | 9.8<br>(6.1 to 13.7) | 46 (8 to 89)          | 1.2<br>(0.2 to 2.4) |
|         | Female | 651<br>(574 to 731)       | 16.1<br>(14.2 to 18.1) | 41 (19 to 68)          | 1 (0.5 to 1.7)       | 0 (0 to 1)   | 0 (0 to 0) | 31 (17 to 48)          | 0.8<br>(0.4 to 1.2) | 71 (12 to 156)        | 1.8<br>(0.3 to 3.9) | 37 (9 to 57)         | 0.9<br>(0.2 to 1.4) | 79 (15 to 185)        | 1.9<br>(0.4 to 4.5) | 34 (11 to 87)            | 0.8<br>(0.3 to 2.1)  | 21 (3 to 43)          | 0.6<br>(0.1 to 1.1) |
| Israel  | Both   | 1670<br>(1530 to 1790)    | 14.4<br>(13.2 to 15.4) | 353<br>(252 to 465)    | 3 (2.2 to 4)         | 1 (0 to 2)   | 0 (0 to 0) | 90 (50 to 138)         | 0.8<br>(0.5 to 1.2) | 107<br>(17 to 249)    | 0.9<br>(0.2 to 2.1) | 33 (8 to 54)         | 0.3<br>(0.1 to 0.5) | 242<br>(58 to 526)    | 2 (0.5 to 4.4)      | 281<br>(170 to 406)      | 2.3<br>(1.4 to 3.4)  | 97 (17 to 188)        | 0.9<br>(0.1 to 1.7) |
|         | Male   | 1210<br>(1110 to 1310)    | 22.9<br>(21.1 to 24.7) | 231<br>(165 to 303)    | 4.4<br>(3.1 to 5.8)  | 0 (0 to 1)   | 0 (0 to 0) | 62 (34 to 97)          | 1.2<br>(0.7 to 1.9) | 70 (11 to 164)        | 1.3<br>(0.2 to 3.1) | 20 (5 to 35)         | 0.4<br>(0.1 to 0.7) | 157<br>(27 to 364)    | 2.9<br>(0.5 to 6.8) | 250<br>(141 to 373)      | 4.7<br>(2.6 to 7)    | 77 (13 to 149)        | 1.4<br>(0.2 to 2.8) |
|         | Female | 459<br>(398 to 512)       | 7.1<br>(6.2 to 8)      | 121<br>(87 to 162)     | 1.9<br>(1.3 to 2.5)  | 0 (0 to 1)   | 0 (0 to 0) | 28 (16 to 43)          | 0.5<br>(0.3 to 0.7) | 37 (6 to 85)          | 0.6<br>(0.1 to 1.3) | 13 (3 to 23)         | 0.2<br>(0.1 to 0.4) | 85 (16 to 199)        | 1.3<br>(0.2 to 2.9) | 31 (17 to 53)            | 0.5<br>(0.2 to 0.8)  | 21 (3 to 42)          | 0.3<br>(0.1 to 0.7) |
| Italy   | Both   | 25700<br>(23600 to 27300) | 17.8<br>(16.5 to 18.9) | 4190<br>(2970 to 5680) | 2.9 (2 to 3.9)       | 17 (4 to 47) | 0 (0 to 0) | 1720<br>(1020 to 2570) | 1.3<br>(0.8 to 1.9) | 2460<br>(428 to 5150) | 1.7<br>(0.3 to 3.5) | 671<br>(173 to 1040) | 0.5<br>(0.1 to 0.7) | 4300<br>(959 to 9250) | 2.8<br>(0.6 to 6.1) | 11800<br>(8500 to 15000) | 7.3<br>(5.2 to 9.3)  | 1130<br>(197 to 2180) | 0.9<br>(0.2 to 1.7) |
|         | Male   | 19700<br>(18100)          | 30.4<br>(28.1)         | 2990<br>(2110)         | 4.6<br>(3.3)         | 11 (3 to 30) | 0 (0 to 0) | 1310<br>(766)          | 2.1<br>(1.3)        | 1750<br>(309)         | 2.7<br>(0.5)        | 470<br>(117)         | 0.7<br>(0.2)        | 3250<br>(573)         | 4.9<br>(0.9)        | 10400<br>(7370)          | 15.1<br>(10.7)       | 934<br>(157)          | 1.6<br>(0.3 to 3)   |

|         |        |                                 |                              |                               |                           |                 |                           |                              |                           |                             |                           |                              |                           |                               |                           |                                 |                            |                             |                           |
|---------|--------|---------------------------------|------------------------------|-------------------------------|---------------------------|-----------------|---------------------------|------------------------------|---------------------------|-----------------------------|---------------------------|------------------------------|---------------------------|-------------------------------|---------------------------|---------------------------------|----------------------------|-----------------------------|---------------------------|
|         |        | to<br>20900)                    | to<br>32.2)                  | to<br>4070)                   | to<br>6.3)                |                 |                           | to<br>1970)                  | to<br>3.2)                | to<br>3630)                 | to<br>5.6)                | to<br>758)                   | to<br>1.1)                | to<br>7260)                   | to<br>10.9)               | to<br>13500)                    | to<br>19.6)                | to<br>1800)                 |                           |
|         | Female | 5990<br>(5240<br>to<br>6550)    | 7.8<br>(7.1<br>to<br>8.5)    | 1200<br>(817<br>to<br>1620)   | 1.5 (1<br>to 2)           | 6 (2 to<br>17)  | 0 (0<br>to 0)             | 419<br>(243<br>to<br>627)    | 0.6<br>(0.4<br>to<br>0.9) | 704<br>(119<br>to<br>1480)  | 0.9<br>(0.2<br>to<br>1.9) | 201<br>(51 to<br>326)        | 0.3<br>(0.1<br>to<br>0.4) | 1050<br>(205<br>to<br>2400)   | 1.2<br>(0.2<br>to<br>2.8) | 1310<br>(680<br>to<br>1930)     | 1.4<br>(0.7<br>to 2)       | 200<br>(30 to<br>396)       | 0.3 (0<br>to<br>0.6)      |
| Jamaica | Both   | 321<br>(253 to<br>405)          | 10.9<br>(8.6<br>to<br>13.8)  | 60 (34<br>to 93)              | 2 (1.2<br>to<br>3.1)      | 11 (4<br>to 25) | 0.4<br>(0.1<br>to<br>0.8) | 22 (12<br>to 35)             | 0.7<br>(0.4<br>to<br>1.2) | 16 (1<br>to 64)             | 0.5 (0<br>to<br>2.2)      | 19 (5<br>to 31)              | 0.6<br>(0.2<br>to 1)      | 75 (16<br>to<br>169)          | 2.5<br>(0.6<br>to<br>5.8) | 29 (15<br>to 50)                | 1 (0.5<br>to<br>1.7)       | 40 (19<br>to 68)            | 1.3<br>(0.6<br>to<br>2.2) |
|         | Male   | 282<br>(220 to<br>356)          | 19.8<br>(15.5<br>to 25)      | 46 (26<br>to 73)              | 3.3<br>(1.8<br>to<br>5.1) | 8 (3 to<br>18)  | 0.6<br>(0.2<br>to<br>1.2) | 16 (9<br>to 26)              | 1.1<br>(0.6<br>to<br>1.8) | 12 (1<br>to 50)             | 0.9<br>(0.1<br>to<br>3.5) | 15 (4<br>to 24)              | 1 (0.3<br>to<br>1.7)      | 57 (10<br>to<br>135)          | 4.1<br>(0.7<br>to<br>9.6) | 28 (14<br>to 47)                | 2 (1<br>to<br>3.4)         | 34 (15<br>to 60)            | 2.3 (1<br>to 4)           |
|         | Female | 40 (30<br>to 52)                | 2.6<br>(1.9<br>to<br>3.4)    | 13 (8<br>to 20)               | 0.8<br>(0.5<br>to<br>1.3) | 3 (1 to<br>7)   | 0.2<br>(0.1<br>to<br>0.5) | 5 (3 to<br>9)                | 0.3<br>(0.2<br>to<br>0.6) | 4 (0 to<br>15)              | 0.2 (0<br>to 1)           | 5 (1 to<br>7)                | 0.3<br>(0.1<br>to<br>0.5) | 17 (4<br>to 41)               | 1.1<br>(0.2<br>to<br>2.6) | 2 (1 to<br>3)                   | 0.1<br>(0.1<br>to<br>0.2)  | 6 (3 to<br>11)              | 0.4<br>(0.2<br>to<br>0.7) |
| Japan   | Both   | 55800<br>(49000<br>to<br>60600) | 14.1<br>(12.7<br>to<br>15.1) | 8030<br>(4860<br>to<br>12000) | 2 (1.2<br>to<br>2.9)      | 18 (4<br>to 55) | 0 (0<br>to 0)             | 3040<br>(1730<br>to<br>4760) | 0.8<br>(0.5<br>to<br>1.3) | 1340<br>(253<br>to<br>2730) | 0.3<br>(0.1<br>to<br>0.7) | 3770<br>(1100<br>to<br>5730) | 0.9<br>(0.3<br>to<br>1.4) | 6480<br>(1360<br>to<br>14800) | 1.5<br>(0.3<br>to<br>3.5) | 18300<br>(12100<br>to<br>24800) | 4 (2.6<br>to<br>5.4)       | 2660<br>(480<br>to<br>5080) | 0.8<br>(0.2<br>to<br>1.6) |
|         | Male   | 45800<br>(40800<br>to<br>49100) | 26.6<br>(24.1<br>to<br>28.4) | 5510<br>(3320<br>to<br>8210)  | 3.2 (2<br>to<br>4.8)      | 11 (2<br>to 33) | 0 (0<br>to 0)             | 1840<br>(1040<br>to<br>2940) | 1.1<br>(0.6<br>to<br>1.8) | 921<br>(174<br>to<br>1880)  | 0.5<br>(0.1<br>to<br>1.1) | 2590<br>(755<br>to<br>3910)  | 1.5<br>(0.5<br>to<br>2.3) | 4890<br>(808<br>to<br>11500)  | 2.7<br>(0.5<br>to<br>6.4) | 16800<br>(10800<br>to<br>23200) | 8.9<br>(5.7<br>to<br>12.2) | 2090<br>(365<br>to<br>3990) | 1.4<br>(0.2<br>to<br>2.7) |
|         | Female | 10000<br>(7940<br>to<br>11700)  | 4.5<br>(3.7<br>to<br>5.1)    | 2520<br>(1480<br>to<br>3850)  | 1 (0.6<br>to<br>1.5)      | 7 (2 to<br>23)  | 0 (0<br>to 0)             | 1200<br>(685<br>to<br>1840)  | 0.6<br>(0.3<br>to<br>0.8) | 421<br>(79 to<br>868)       | 0.2 (0<br>to<br>0.4)      | 1180<br>(351<br>to<br>1850)  | 0.5<br>(0.1<br>to<br>0.7) | 1590<br>(286<br>to<br>3910)   | 0.6<br>(0.1<br>to<br>1.4) | 1530<br>(653<br>to<br>2490)     | 0.5<br>(0.2<br>to<br>0.7)  | 568<br>(87 to<br>1130)      | 0.3<br>(0.1<br>to<br>0.7) |
| Jordan  | Both   | 653<br>(516 to<br>807)          | 10.9<br>(8.7<br>to<br>13.5)  | 183<br>(127<br>to<br>253)     | 3 (2.1<br>to<br>4.2)      | 0 (0 to<br>0)   | 0 (0<br>to 0)             | 66 (37<br>to<br>101)         | 1 (0.6<br>to<br>1.6)      | 41 (6<br>to<br>104)         | 0.7<br>(0.1<br>to<br>1.7) | 36 (8<br>to 58)              | 0.6<br>(0.1<br>to<br>0.9) | 112<br>(24 to<br>247)         | 2 (0.4<br>to<br>4.4)      | 59 (29<br>to<br>101)            | 1.3<br>(0.7<br>to<br>2.2)  | 41 (18<br>to 71)            | 0.5<br>(0.2<br>to<br>0.9) |
|         | Male   | 584<br>(451 to<br>735)          | 18.6<br>(14.6<br>to<br>23.3) | 142<br>(95 to<br>203)         | 4.5 (3<br>to<br>6.3)      | 0 (0 to<br>0)   | 0 (0<br>to 0)             | 46 (25<br>to 73)             | 1.4<br>(0.8<br>to<br>2.2) | 32 (5<br>to 81)             | 1 (0.1<br>to<br>2.6)      | 28 (6<br>to 46)              | 0.9<br>(0.2<br>to<br>1.4) | 91 (17<br>to<br>208)          | 3.1<br>(0.6<br>to<br>7.1) | 58 (28<br>to<br>100)            | 2.4<br>(1.2<br>to<br>4.1)  | 39 (17<br>to 70)            | 1 (0.4<br>to<br>1.7)      |
|         | Female | 69 (52<br>to 89)                | 2.6 (2<br>to<br>3.3)         | 41 (28<br>to 57)              | 1.4 (1<br>to 2)           | 0 (0 to<br>0)   | 0 (0<br>to 0)             | 20 (11<br>to 31)             | 0.6<br>(0.4<br>to 1)      | 9 (1 to<br>24)              | 0.3 (0<br>to<br>0.8)      | 8 (2 to<br>14)               | 0.3<br>(0.1<br>to<br>0.5) | 22 (5<br>to 50)               | 0.8<br>(0.2<br>to<br>1.9) | 1 (0 to<br>2)                   | 0.1 (0<br>to<br>0.1)       | 1 (1 to<br>2)               | 0 (0<br>to<br>0.1)        |

|            |        |                        |                        |                     |                     |                     |                      |                     |                     |                     |                      |                    |                     |                    |                      |                     |                     |                     |                     |
|------------|--------|------------------------|------------------------|---------------------|---------------------|---------------------|----------------------|---------------------|---------------------|---------------------|----------------------|--------------------|---------------------|--------------------|----------------------|---------------------|---------------------|---------------------|---------------------|
| Kazakhstan | Both   | 2470<br>(2090 to 2880) | 13.8<br>(11.8 to 16.1) | 499<br>(301 to 730) | 2.8<br>(1.7 to 4.1) | 62 (21 to 138)      | 0.4<br>(0.1 to 0.8)  | 179<br>(104 to 275) | 1 (0.6 to 1.5)      | 306<br>(28 to 1040) | 1.7<br>(0.2 to 5.9)  | 163<br>(43 to 253) | 0.9<br>(0.2 to 1.4) | 324<br>(71 to 733) | 1.9<br>(0.4 to 4.3)  | 229<br>(134 to 352) | 1.4<br>(0.8 to 2.1) | 248<br>(120 to 404) | 1.2<br>(0.6 to 2)   |
|            | Male   | 2330<br>(1970 to 2730) | 33.1<br>(28.2 to 38.3) | 398<br>(240 to 584) | 5.6<br>(3.4 to 8.2) | 45 (15 to 100)      | 0.6<br>(0.2 to 1.4)  | 121<br>(69 to 190)  | 1.7 (1 to 2.7)      | 243<br>(22 to 826)  | 3.4<br>(0.3 to 11.7) | 129<br>(35 to 204) | 1.8<br>(0.5 to 2.9) | 244<br>(40 to 586) | 3.6<br>(0.6 to 8.7)  | 197<br>(107 to 306) | 3.1<br>(1.7 to 4.8) | 210<br>(97 to 351)  | 2.4<br>(1.1 to 4)   |
|            | Female | 138<br>(106 to 179)    | 1.3 (1 to 1.7)         | 101<br>(62 to 150)  | 1 (0.6 to 1.5)      | 17 (6 to 39)        | 0.2<br>(0.1 to 0.4)  | 58 (33 to 91)       | 0.6<br>(0.3 to 0.9) | 63 (6 to 215)       | 0.6<br>(0.1 to 2.1)  | 35 (9 to 55)       | 0.3<br>(0.1 to 0.5) | 80 (16 to 181)     | 0.8<br>(0.2 to 1.8)  | 33 (10 to 79)       | 0.3<br>(0.1 to 0.8) | 38 (18 to 65)       | 0.3<br>(0.2 to 0.6) |
| Kenya      | Both   | 478<br>(389 to 588)    | 2.5 (2 to 3)           | 92 (49 to 148)      | 0.5<br>(0.2 to 0.7) | 284<br>(191 to 404) | 1.4 (1 to 2)         | 25 (12 to 42)       | 0.1<br>(0.1 to 0.2) | 52 (10 to 111)      | 0.3<br>(0.1 to 0.5)  | 62 (20 to 99)      | 0.3<br>(0.1 to 0.5) | 73 (15 to 171)     | 0.4<br>(0.1 to 0.9)  | 67 (26 to 223)      | 0.4<br>(0.2 to 1.3) | 91 (45 to 148)      | 0.4<br>(0.2 to 0.6) |
|            | Male   | 447<br>(362 to 551)    | 5.2<br>(4.2 to 6.2)    | 72 (38 to 115)      | 0.8<br>(0.4 to 1.3) | 207<br>(132 to 293) | 2.3<br>(1.5 to 3.2)  | 17 (8 to 28)        | 0.2<br>(0.1 to 0.3) | 39 (7 to 84)        | 0.4<br>(0.1 to 0.9)  | 46 (15 to 74)      | 0.5<br>(0.2 to 0.8) | 61 (10 to 149)     | 0.7<br>(0.1 to 1.8)  | 55 (18 to 207)      | 0.8<br>(0.2 to 2.8) | 71 (33 to 118)      | 0.6<br>(0.3 to 1)   |
|            | Female | 31 (20 to 48)          | 0.3<br>(0.2 to 0.5)    | 20 (9 to 37)        | 0.2<br>(0.1 to 0.3) | 78 (44 to 131)      | 0.7<br>(0.4 to 1.2)  | 8 (4 to 16)         | 0.1 (0 to 0.1)      | 13 (2 to 30)        | 0.1 (0 to 0.3)       | 16 (4 to 30)       | 0.1 (0 to 0.3)      | 13 (2 to 34)       | 0.1 (0 to 0.3)       | 12 (3 to 26)        | 0.1 (0 to 0.3)      | 19 (8 to 38)        | 0.1<br>(0.1 to 0.3) |
| Kiribati   | Both   | 9 (7 to 12)            | 14.7<br>(11.1 to 18.8) | 0 (0 to 1)          | 0.6<br>(0.2 to 1.6) | 3 (2 to 4)          | 4.2<br>(2.5 to 6.1)  | 1 (0 to 2)          | 1.4<br>(0.7 to 2.3) | 0 (0 to 2)          | 0.6 (0 to 2.5)       | 1 (0 to 1)         | 0.9<br>(0.2 to 1.5) | 2 (0 to 5)         | 3.2<br>(0.7 to 7)    | 0 (0 to 0)          | 0.5<br>(0.3 to 0.9) | 0 (0 to 1)          | 0.5<br>(0.2 to 1)   |
|            | Male   | 8 (6 to 11)            | 29.9<br>(22.2 to 38.5) | 0 (0 to 1)          | 1.3<br>(0.4 to 3.2) | 2 (1 to 3)          | 7.9<br>(4.7 to 11.8) | 1 (0 to 1)          | 2.5<br>(1.3 to 4.2) | 0 (0 to 1)          | 1.2<br>(0.1 to 5)    | 0 (0 to 1)         | 1.7<br>(0.5 to 3)   | 2 (0 to 4)         | 6.6<br>(1.3 to 14.9) | 0 (0 to 0)          | 1.2<br>(0.7 to 2.1) | 0 (0 to 1)          | 1 (0.4 to 1.9)      |
|            | Female | 2 (1 to 2)             | 4.4<br>(3.2 to 5.9)    | 0 (0 to 0)          | 0.2 (0 to 0.4)      | 1 (0 to 1)          | 1.6 (1 to 2.4)       | 0 (0 to 0)          | 0.6<br>(0.3 to 1)   | 0 (0 to 0)          | 0.2 (0 to 0.9)       | 0 (0 to 0)         | 0.3<br>(0.1 to 0.6) | 0 (0 to 1)         | 0.9<br>(0.2 to 2.2)  | 0 (0 to 0)          | 0.1<br>(0.1 to 0.2) | 0 (0 to 0)          | 0.2<br>(0.1 to 0.3) |
| Kuwait     | Both   | 143<br>(112 to 176)    | 7 (5.5 to 8.7)         | 65 (46 to 87)       | 3.1<br>(2.2 to 4.1) | 0 (0 to 0)          | 0 (0 to 0)           | 18 (11 to 27)       | 0.8<br>(0.5 to 1.2) | 5 (1 to 13)         | 0.2 (0 to 0.6)       | 8 (2 to 13)        | 0.4<br>(0.1 to 0.6) | 36 (8 to 77)       | 1.9<br>(0.4 to 4)    | 22 (12 to 35)       | 1.3<br>(0.7 to 2.1) | 14 (6 to 23)        | 0.5<br>(0.2 to 0.8) |
|            | Male   | 134<br>(105 to 169)    | 11<br>(8.5 to 13.7)    | 52 (36 to 71)       | 4.2<br>(2.9 to 5.5) | 0 (0 to 0)          | 0 (0 to 0)           | 13 (7 to 20)        | 1 (0.6 to 1.6)      | 4 (1 to 10)         | 0.3 (0 to 0.8)       | 6 (1 to 10)        | 0.5<br>(0.1 to 0.9) | 30 (5 to 66)       | 2.6<br>(0.5 to 4.7)  | 21 (11 to 35)       | 2.1<br>(1.1 to 3.1) | 12 (5 to 22)        | 0.7<br>(0.3 to 1)   |

|            |        |                        |                              |                      |                           |                           |                           |                     |                           |                     |                            |                     |                           |                      |                           |                      |                           |                      |                           |
|------------|--------|------------------------|------------------------------|----------------------|---------------------------|---------------------------|---------------------------|---------------------|---------------------------|---------------------|----------------------------|---------------------|---------------------------|----------------------|---------------------------|----------------------|---------------------------|----------------------|---------------------------|
|            |        |                        | to<br>13.7)                  |                      | to<br>5.7)                |                           |                           |                     |                           |                     |                            |                     | to<br>0.8)                |                      | to<br>5.7)                |                      | to<br>3.4)                |                      | to<br>1.3)                |
|            | Female | 9 (6 to<br>11)         | 1 (0.7<br>to<br>1.4)         | 13 (10<br>to<br>18)  | 1.4 (1<br>to<br>1.9)      | 0 (0 to<br>0)             | 0 (0<br>to<br>0)          | 5 (3 to<br>8)       | 0.5<br>(0.3<br>to<br>0.8) | 1 (0 to<br>3)       | 0.1 (0<br>to<br>0.3)       | 2 (0 to<br>3)       | 0.2 (0<br>to<br>0.3)      | 6 (1 to<br>13)       | 0.8<br>(0.2<br>to<br>1.7) | 0 (0 to<br>0)        | 0 (0<br>to<br>0.1)        | 1 (1 to<br>2)        | 0.1 (0<br>to<br>0.2)      |
| Kyrgyzstan | Both   | 366<br>(316 to<br>417) | 8.1 (7<br>to<br>9.1)         | 74 (44<br>to<br>114) | 1.6 (1<br>to<br>2.5)      | 37 (19<br>to<br>63)       | 0.8<br>(0.4<br>to<br>1.4) | 40 (25<br>to<br>60) | 0.9<br>(0.5<br>to<br>1.3) | 44 (3<br>to<br>144) | 1 (0.1<br>to<br>3.2)       | 28 (9<br>to<br>44)  | 0.6<br>(0.2<br>to<br>1)   | 28 (6<br>to<br>66)   | 0.7<br>(0.1<br>to<br>1.5) | 16 (9<br>to<br>25)   | 0.4<br>(0.2<br>to<br>0.6) | 39 (18<br>to<br>63)  | 0.7<br>(0.3<br>to<br>1.2) |
|            | Male   | 338<br>(292 to<br>386) | 17.6<br>(15.3<br>to<br>20)   | 57 (33<br>to<br>88)  | 2.9<br>(1.7<br>to<br>4.5) | 26 (12<br>to<br>45)       | 1.3<br>(0.6<br>to<br>2.3) | 24 (15<br>to<br>37) | 1.3<br>(0.8<br>to<br>2)   | 33 (2<br>to<br>109) | 1.7<br>(0.1<br>to<br>5.7)  | 21 (7<br>to<br>33)  | 1.1<br>(0.3<br>to<br>1.7) | 21 (3<br>to<br>52)   | 1.2<br>(0.2<br>to<br>2.8) | 15 (8<br>to<br>24)   | 0.9<br>(0.5<br>to<br>1.4) | 33 (15<br>to<br>55)  | 1.4<br>(0.6<br>to<br>2.3) |
|            | Female | 28 (21<br>to<br>35)    | 1.1<br>(0.9<br>to<br>1.4)    | 17 (9<br>to<br>26)   | 0.7<br>(0.4<br>to<br>1)   | 12 (6<br>to<br>19)        | 0.5<br>(0.2<br>to<br>0.7) | 16 (10<br>to<br>23) | 0.6<br>(0.4<br>to<br>0.9) | 11 (1<br>to<br>36)  | 0.4 (0<br>to<br>1.4)       | 7 (2 to<br>11)      | 0.3<br>(0.1<br>to<br>0.4) | 7 (1 to<br>18)       | 0.3<br>(0.1<br>to<br>0.7) | 1 (0 to<br>2)        | 0 (0<br>to<br>0.1)        | 5 (2 to<br>9)        | 0.2<br>(0.1<br>to<br>0.3) |
| Laos       | Both   | 612<br>(448 to<br>782) | 15.5<br>(11.6<br>to<br>19.4) | 63 (30<br>to<br>109) | 1.5<br>(0.7<br>to<br>2.6) | 260<br>(157<br>to<br>378) | 6.3<br>(3.9<br>to<br>9.1) | 52 (27<br>to<br>85) | 1.3<br>(0.7<br>to<br>2.1) | 22 (2<br>to<br>79)  | 0.5 (0<br>to<br>1.9)       | 39 (10<br>to<br>65) | 1 (0.2<br>to<br>1.6)      | 97 (21<br>to<br>224) | 2.6<br>(0.6<br>to<br>6)   | 23 (11<br>to<br>41)  | 0.7<br>(0.3<br>to<br>1.2) | 70 (30<br>to<br>126) | 1.4<br>(0.6<br>to<br>2.5) |
|            | Male   | 558<br>(411 to<br>717) | 29.8<br>(22.3<br>to<br>37.7) | 50 (24<br>to<br>87)  | 2.6<br>(1.2<br>to<br>4.5) | 185<br>(109<br>to<br>274) | 9.6<br>(5.7<br>to<br>14)  | 28 (14<br>to<br>47) | 1.5<br>(0.8<br>to<br>2.5) | 16 (1<br>to<br>59)  | 0.8<br>(0.1<br>to<br>3)    | 29 (7<br>to<br>48)  | 1.5<br>(0.4<br>to<br>2.5) | 72 (12<br>to<br>178) | 4.1<br>(0.7<br>to<br>10)  | 21 (9<br>to<br>38)   | 1.4<br>(0.6<br>to<br>2.5) | 49 (20<br>to<br>88)  | 2 (0.8<br>to<br>3.6)      |
|            | Female | 54 (38<br>to<br>80)    | 2.7<br>(1.9<br>to<br>4)      | 13 (6<br>to<br>24)   | 0.6<br>(0.3<br>to<br>1.1) | 75 (47<br>to<br>113)      | 3.4<br>(2.2<br>to<br>5.2) | 23 (12<br>to<br>40) | 1 (0.5<br>to<br>1.8)      | 6 (0 to<br>21)      | 0.3 (0<br>to<br>0.9)       | 11 (3<br>to<br>18)  | 0.5<br>(0.1<br>to<br>0.8) | 26 (5<br>to<br>63)   | 1.3<br>(0.3<br>to<br>3.2) | 2 (1 to<br>4)        | 0.1 (0<br>to<br>0.2)      | 21 (8<br>to<br>41)   | 0.8<br>(0.3<br>to<br>1.6) |
| Latvia     | Both   | 668<br>(543 to<br>826) | 17.4<br>(14 to<br>21.6)      | 78 (48<br>to<br>119) | 2 (1.2<br>to<br>3.1)      | 6 (1 to<br>17)            | 0.2 (0<br>to<br>0.4)      | 38 (21<br>to<br>60) | 1 (0.5<br>to<br>1.6)      | 78 (9<br>to<br>189) | 2 (0.2<br>to<br>4.9)       | 49 (15<br>to<br>81) | 1.3<br>(0.4<br>to<br>2.1) | 64 (13<br>to<br>148) | 1.6<br>(0.3<br>to<br>3.7) | 63 (34<br>to<br>106) | 1.5<br>(0.8<br>to<br>2.5) | 23 (4<br>to<br>46)   | 0.7<br>(0.1<br>to<br>1.4) |
|            | Male   | 577<br>(454 to<br>734) | 39.5<br>(31.1<br>to<br>50.2) | 59 (36<br>to<br>93)  | 4.1<br>(2.4<br>to<br>6.4) | 4 (1 to<br>12)            | 0.3<br>(0.1<br>to<br>0.8) | 24 (13<br>to<br>40) | 1.7<br>(0.9<br>to<br>2.8) | 59 (7<br>to<br>146) | 4.1<br>(0.5<br>to<br>10.1) | 37 (11<br>to<br>63) | 2.6<br>(0.8<br>to<br>4.4) | 49 (8<br>to<br>121)  | 3.3<br>(0.5<br>to<br>8.2) | 58 (29<br>to<br>102) | 3.9<br>(1.9<br>to<br>6.8) | 18 (3<br>to<br>36)   | 1.2<br>(0.2<br>to<br>2.5) |
|            | Female | 91 (66<br>to<br>122)   | 3.9<br>(2.8<br>to<br>5.2)    | 19 (11<br>to<br>30)  | 0.8<br>(0.5<br>to<br>1.2) | 2 (0 to<br>5)             | 0.1 (0<br>to<br>0.2)      | 14 (7<br>to<br>22)  | 0.6<br>(0.3<br>to<br>1)   | 19 (2<br>to<br>47)  | 0.8<br>(0.1<br>to<br>1.9)  | 12 (4<br>to<br>21)  | 0.5<br>(0.1<br>to<br>0.8) | 15 (3<br>to<br>37)   | 0.6<br>(0.1<br>to<br>1.4) | 5 (2 to<br>9)        | 0.2<br>(0.1<br>to<br>0.3) | 5 (1 to<br>11)       | 0.3 (0<br>to<br>0.6)      |

|         |        |                          |                              |                           |                            |                     |                           |                       |                           |                     |                           |                 |                           |                       |                            |                      |                           |                      |                           |
|---------|--------|--------------------------|------------------------------|---------------------------|----------------------------|---------------------|---------------------------|-----------------------|---------------------------|---------------------|---------------------------|-----------------|---------------------------|-----------------------|----------------------------|----------------------|---------------------------|----------------------|---------------------------|
| Lebanon | Both   | 1110<br>(909 to<br>1470) | 21.3<br>(17.5<br>to<br>28.2) | 276<br>(184<br>to<br>397) | 5.3<br>(3.5<br>to<br>7.6)  | 1 (0 to<br>2)       | 0 (0<br>to 0)             | 131<br>(78 to<br>204) | 2.5<br>(1.5<br>to<br>3.9) | 63 (5<br>to<br>249) | 1.2<br>(0.1<br>to<br>4.8) | 17 (4<br>to 30) | 0.3<br>(0.1<br>to<br>0.6) | 190<br>(45 to<br>418) | 3.6<br>(0.9<br>to 8)       | 10 (2<br>to 42)      | 0.2 (0<br>to<br>0.8)      | 66 (30<br>to<br>118) | 1.3<br>(0.6<br>to<br>2.3) |
|         | Male   | 798<br>(640 to<br>1070)  | 34<br>(27.3<br>to<br>45.5)   | 185<br>(121<br>to<br>266) | 7.9<br>(5.2<br>to<br>11.3) | 0 (0 to<br>1)       | 0 (0<br>to 0)             | 86 (51<br>to<br>134)  | 3.7<br>(2.2<br>to<br>5.7) | 43 (3<br>to<br>164) | 1.8<br>(0.1<br>to 7)      | 11 (3<br>to 20) | 0.4<br>(0.1<br>to<br>0.8) | 135<br>(25 to<br>310) | 5.8<br>(1.1<br>to<br>13.2) | 7 (0 to<br>37)       | 0.3 (0<br>to<br>1.6)      | 60 (26<br>to<br>109) | 2.5<br>(1.1<br>to<br>4.6) |
|         | Female | 309<br>(221 to<br>435)   | 10.8<br>(7.8<br>to<br>15.2)  | 91 (58<br>to<br>135)      | 3.2 (2<br>to<br>4.7)       | 0 (0 to<br>1)       | 0 (0<br>to 0)             | 45 (25<br>to<br>72)   | 1.6<br>(0.9<br>to<br>2.5) | 21 (2<br>to<br>82)  | 0.7<br>(0.1<br>to<br>2.9) | 6 (2 to<br>12)  | 0.2<br>(0.1<br>to<br>0.4) | 55 (11<br>to<br>130)  | 1.9<br>(0.4<br>to<br>4.5)  | 3 (1 to<br>8)        | 0.1 (0<br>to<br>0.3)      | 6 (2 to<br>11)       | 0.2<br>(0.1<br>to<br>0.4) |
| Lesotho | Both   | 135<br>(91 to<br>191)    | 10.9<br>(7.6<br>to<br>15.2)  | 24 (12<br>to<br>42)       | 1.9<br>(0.9<br>to<br>3.3)  | 41 (22<br>to<br>66) | 3.3<br>(1.8<br>to<br>5.3) | 11 (5<br>to<br>20)    | 0.9<br>(0.4<br>to<br>1.5) | 12 (1<br>to<br>48)  | 1 (0.1<br>to<br>3.8)      | 15 (5<br>to 26) | 1.2<br>(0.4<br>to<br>2.1) | 19 (4<br>to<br>46)    | 1.6<br>(0.3<br>to<br>3.8)  | 67 (31<br>to<br>111) | 5.5<br>(2.6<br>to 9)      | 10 (4<br>to<br>20)   | 0.7<br>(0.3<br>to<br>1.3) |
|         | Male   | 123<br>(84 to<br>176)    | 24.8<br>(17.4<br>to<br>34.8) | 19 (9<br>to<br>33)        | 3.8<br>(1.8<br>to<br>6.4)  | 29 (16<br>to<br>48) | 5.8<br>(3.2<br>to<br>9.7) | 7 (3 to<br>12)        | 1.4<br>(0.7<br>to<br>2.4) | 9 (1 to<br>36)      | 1.8<br>(0.1<br>to 7)      | 11 (4<br>to 19) | 2.2<br>(0.8<br>to<br>3.8) | 14 (2<br>to<br>35)    | 3 (0.5<br>to<br>7.5)       | 64 (28<br>to<br>107) | 14<br>(6.6<br>to<br>22.8) | 9 (3 to<br>17)       | 1.4<br>(0.5<br>to<br>2.7) |
|         | Female | 12 (7<br>to 19)          | 2 (1.2<br>to<br>3)           | 5 (2 to<br>10)            | 0.7<br>(0.3<br>to<br>1.4)  | 12 (6<br>to<br>20)  | 1.7<br>(0.9<br>to<br>2.9) | 4 (2 to<br>8)         | 0.6<br>(0.3<br>to<br>1.1) | 3 (0 to<br>12)      | 0.5 (0<br>to<br>1.7)      | 4 (1 to<br>7)   | 0.5<br>(0.2<br>to<br>1)   | 5 (1 to<br>14)        | 0.8<br>(0.1<br>to 2)       | 3 (1 to<br>8)        | 0.5<br>(0.2<br>to<br>1.2) | 1 (0 to<br>3)        | 0.2<br>(0.1<br>to<br>0.4) |
| Liberia | Both   | 54 (35<br>to 76)         | 3 (2<br>to<br>4.3)           | 14 (6<br>to<br>27)        | 0.8<br>(0.3<br>to<br>1.5)  | 50 (30<br>to<br>77) | 2.8<br>(1.6<br>to<br>4.2) | 3 (1 to<br>6)         | 0.2<br>(0.1<br>to<br>0.3) | 8 (1 to<br>30)      | 0.5 (0<br>to<br>1.6)      | 10 (3<br>to 16) | 0.5<br>(0.2<br>to<br>0.9) | 16 (3<br>to<br>37)    | 1 (0.2<br>to<br>2.3)       | 3 (1 to<br>9)        | 0.2<br>(0.1<br>to<br>0.5) | 9 (4 to<br>17)       | 0.4<br>(0.2<br>to<br>0.7) |
|         | Male   | 50 (33<br>to 72)         | 5.6<br>(3.7<br>to 8)         | 11 (4<br>to<br>21)        | 1.2<br>(0.5<br>to<br>2.3)  | 35 (20<br>to<br>56) | 3.9<br>(2.2<br>to<br>6.1) | 2 (1 to<br>4)         | 0.2<br>(0.1<br>to<br>0.4) | 6 (0 to<br>22)      | 0.7<br>(0.1<br>to<br>2.4) | 7 (2 to<br>12)  | 0.8<br>(0.2<br>to<br>1.3) | 12 (2<br>to<br>29)    | 1.5<br>(0.2<br>to<br>3.5)  | 3 (1 to<br>8)        | 0.4<br>(0.1<br>to 1)      | 7 (2 to<br>13)       | 0.5<br>(0.2<br>to<br>1.1) |
|         | Female | 4 (2 to<br>5)            | 0.4<br>(0.3<br>to<br>0.6)    | 3 (1 to<br>6)             | 0.3<br>(0.1<br>to<br>0.7)  | 15 (9<br>to<br>23)  | 1.6 (1<br>to<br>2.5)      | 1 (1 to<br>2)         | 0.1<br>(0.1<br>to<br>0.2) | 2 (0 to<br>8)       | 0.3 (0<br>to<br>0.9)      | 3 (1 to<br>5)   | 0.3<br>(0.1<br>to<br>0.5) | 4 (1 to<br>10)        | 0.5<br>(0.1<br>to<br>1.2)  | 1 (0 to<br>1)        | 0.1 (0<br>to<br>0.2)      | 2 (1 to<br>4)        | 0.2<br>(0.1<br>to<br>0.4) |
| Libya   | Both   | 644<br>(467 to<br>823)   | 13.5<br>(9.8<br>to<br>17.2)  | 215<br>(130<br>to<br>311) | 4.4<br>(2.7<br>to<br>6.4)  | 0 (0 to<br>1)       | 0 (0<br>to 0)             | 84 (49<br>to<br>131)  | 1.8 (1<br>to<br>2.7)      | 35 (3<br>to<br>124) | 0.7<br>(0.1<br>to<br>2.6) | 28 (7<br>to 47) | 0.6<br>(0.1<br>to<br>0.9) | 130<br>(26 to<br>294) | 2.9<br>(0.6<br>to<br>6.5)  | 14 (3<br>to 62)      | 0.3<br>(0.1<br>to<br>1.5) | 50 (22<br>to<br>92)  | 0.9<br>(0.4<br>to<br>1.6) |
|         | Male   | 638<br>(462 to<br>814)   | 26.2<br>(19 to<br>33.5)      | 187<br>(112)              | 7.6<br>(4.5)               | 0 (0 to<br>1)       | 0 (0<br>to 0)             | 70 (40<br>to<br>109)  | 2.9<br>(1.7)              | 31 (2<br>to<br>108) | 1.2<br>(0.1)              | 24 (6<br>to 40) | 1 (0.2<br>to<br>1.6)      | 114<br>(20 to<br>266) | 5 (0.9<br>to<br>11.5)      | 13 (3<br>to 62)      | 0.6<br>(0.1)              | 48 (21<br>to 88)     | 1.6<br>(0.7<br>to 3)      |

|            |        |                   |                     |                |                  |                  |                  |               |                  |               |                  |               |                  |                |                  |                |                    |               |                  |
|------------|--------|-------------------|---------------------|----------------|------------------|------------------|------------------|---------------|------------------|---------------|------------------|---------------|------------------|----------------|------------------|----------------|--------------------|---------------|------------------|
|            |        |                   |                     | to<br>269)     | to<br>10.9)      |                  |                  |               | to<br>4.6)       |               | to<br>4.4)       |               |                  |                |                  |                | to<br>2.9)         |               |                  |
|            | Female | 6 (3 to 9)        | 0.3 (0.2 to 0.4)    | 28 (16 to 43)  | 1.2 (0.6 to 1.8) | 0 (0 to 0)       | 0 (0 to 0)       | 15 (8 to 23)  | 0.6 (0.3 to 0.9) | 5 (0 to 16)   | 0.2 (0 to 0.7)   | 4 (1 to 7)    | 0.2 (0 to 0.3)   | 16 (3 to 38)   | 0.7 (0.2 to 1.7) | 1 (0 to 2)     | 0 (0 to 0.1)       | 2 (1 to 4)    | 0.1 (0 to 0.1)   |
| Lithuania  | Both   | 876 (705 to 1060) | 15.8 (12.7 to 19.3) | 89 (52 to 138) | 1.6 (0.9 to 2.5) | 4 (1 to 12)      | 0.1 (0 to 0.2)   | 47 (26 to 76) | 0.9 (0.5 to 1.4) | 59 (7 to 154) | 1.1 (0.1 to 2.8) | 60 (17 to 98) | 1.1 (0.3 to 1.8) | 74 (15 to 176) | 1.3 (0.2 to 3.1) | 67 (37 to 107) | 1.1 (0.6 to 1.8)   | 34 (6 to 67)  | 0.7 (0.1 to 1.3) |
|            | Male   | 783 (627 to 949)  | 36.7 (29.4 to 44.5) | 69 (39 to 108) | 3.3 (1.9 to 5.1) | 3 (1 to 8)       | 0.1 (0 to 0.4)   | 32 (18 to 53) | 1.5 (0.8 to 2.5) | 46 (6 to 119) | 2.1 (0.3 to 5.6) | 47 (13 to 77) | 2.2 (0.6 to 3.6) | 60 (9 to 148)  | 2.8 (0.4 to 6.9) | 59 (30 to 99)  | 2.7 (1.4 to 4.6)   | 26 (4 to 53)  | 1.2 (0.2 to 2.5) |
|            | Female | 93 (73 to 117)    | 2.9 (2.2 to 3.7)    | 20 (11 to 31)  | 0.6 (0.3 to 0.9) | 1 (0 to 4)       | 0 (0 to 0.1)     | 15 (8 to 24)  | 0.4 (0.2 to 0.7) | 13 (2 to 34)  | 0.4 (0 to 1)     | 14 (4 to 22)  | 0.4 (0.1 to 0.6) | 14 (3 to 36)   | 0.4 (0.1 to 0.9) | 8 (4 to 14)    | 0.2 (0.1 to 0.3)   | 7 (1 to 15)   | 0.2 (0 to 0.5)   |
| Luxembourg | Both   | 203 (176 to 233)  | 20.4 (17.7 to 23.4) | 19 (11 to 29)  | 1.9 (1.1 to 2.9) | 0 (0 to 0)       | 0 (0 to 0)       | 11 (7 to 18)  | 1.2 (0.7 to 1.8) | 25 (4 to 52)  | 2.5 (0.4 to 5.2) | 11 (3 to 17)  | 1.1 (0.3 to 1.7) | 37 (9 to 81)   | 3.6 (0.8 to 8)   | 71 (48 to 97)  | 6.9 (4.6 to 9.5)   | 8 (1 to 16)   | 0.8 (0.1 to 1.6) |
|            | Male   | 146 (126 to 167)  | 31.6 (27.4 to 36.2) | 13 (7 to 20)   | 2.8 (1.6 to 4.2) | 0 (0 to 0)       | 0 (0 to 0)       | 7 (4 to 11)   | 1.6 (0.9 to 2.5) | 17 (3 to 35)  | 3.8 (0.6 to 7.7) | 7 (2 to 11)   | 1.6 (0.4 to 2.5) | 27 (5 to 60)   | 5.8 (1 to 13.1)  | 68 (45 to 93)  | 14.8 (9.8 to 20.4) | 6 (1 to 12)   | 1.3 (0.2 to 2.6) |
|            | Female | 57 (46 to 69)     | 10.8 (8.8 to 13)    | 6 (3 to 9)     | 1.1 (0.6 to 1.7) | 0 (0 to 0)       | 0 (0 to 0)       | 4 (2 to 7)    | 0.8 (0.5 to 1.3) | 8 (1 to 17)   | 1.5 (0.2 to 3.2) | 4 (1 to 6)    | 0.7 (0.2 to 1.1) | 10 (2 to 24)   | 1.8 (0.4 to 4.2) | 3 (2 to 6)     | 0.6 (0.3 to 1)     | 2 (0 to 3)    | 0.3 (0.1 to 0.7) |
| Madagascar | Both   | 182 (128 to 250)  | 1.9 (1.4 to 2.5)    | 25 (10 to 49)  | 0.3 (0.1 to 0.5) | 213 (136 to 319) | 2.1 (1.4 to 3.1) | 14 (6 to 26)  | 0.1 (0.1 to 0.2) | 29 (2 to 115) | 0.3 (0 to 1.1)   | 36 (13 to 62) | 0.4 (0.1 to 0.6) | 35 (7 to 86)   | 0.4 (0.1 to 1)   | 17 (4 to 93)   | 0.2 (0.1 to 1.2)   | 44 (18 to 81) | 0.3 (0.1 to 0.6) |
|            | Male   | 171 (119 to 234)  | 3.7 (2.7 to 5)      | 19 (7 to 37)   | 0.4 (0.2 to 0.8) | 143 (88 to 216)  | 3 (1.9 to 4.5)   | 8 (3 to 16)   | 0.2 (0.1 to 0.3) | 20 (1 to 77)  | 0.4 (0 to 1.6)   | 25 (8 to 43)  | 0.5 (0.2 to 0.9) | 25 (4 to 67)   | 0.6 (0.1 to 1.7) | 11 (1 to 85)   | 0.3 (0 to 2.3)     | 28 (11 to 54) | 0.4 (0.2 to 0.8) |
|            | Female | 11 (7 to 17)      | 0.2 (0.1 to 0.3)    | 6 (2 to 12)    | 0.1 (0 to 0.2)   | 71 (43 to 104)   | 1.3 (0.8 to 1.9) | 5 (2 to 10)   | 0.1 (0 to 0.2)   | 9 (1 to 35)   | 0.2 (0 to 0.6)   | 12 (4 to 20)  | 0.2 (0.1 to 0.4) | 9 (2 to 24)    | 0.2 (0 to 0.5)   | 6 (1 to 13)    | 0.1 (0 to 0.3)     | 16 (6 to 30)  | 0.2 (0.1 to 0.4) |



|          |        |                     |                     |                  |                  |                  |                  |                  |                  |               |                  |                 |                  |                   |                  |                 |                  |                  |                  |
|----------|--------|---------------------|---------------------|------------------|------------------|------------------|------------------|------------------|------------------|---------------|------------------|-----------------|------------------|-------------------|------------------|-----------------|------------------|------------------|------------------|
| Malawi   | Both   | 169<br>(129 to 218) | 2.6 (2 to 3.3)      | 16 (7 to 33)     | 0.2 (0.1 to 0.5) | 135 (91 to 192)  | 2 (1.4 to 2.8)   | 8 (4 to 14)      | 0.1 (0.1 to 0.2) | 16 (1 to 58)  | 0.2 (0 to 0.8)   | 20 (6 to 34)    | 0.3 (0.1 to 0.5) | 32 (7 to 72)      | 0.5 (0.1 to 1.1) | 18 (6 to 75)    | 0.3 (0.1 to 1.2) | 24 (11 to 42)    | 0.3 (0.1 to 0.5) |
|          | Male   | 154 (116 to 200)    | 5.8 (4.5 to 7.5)    | 13 (5 to 26)     | 0.4 (0.2 to 0.9) | 93 (61 to 136)   | 3.2 (2.2 to 4.7) | 5 (2 to 9)       | 0.2 (0.1 to 0.3) | 11 (1 to 43)  | 0.4 (0 to 1.5)   | 14 (4 to 25)    | 0.5 (0.1 to 0.8) | 24 (4 to 58)      | 0.9 (0.1 to 2.2) | 14 (3 to 68)    | 0.6 (0.2 to 2.8) | 17 (7 to 32)     | 0.5 (0.2 to 0.9) |
|          | Female | 15 (9 to 21)        | 0.4 (0.2 to 0.6)    | 4 (1 to 8)       | 0.1 (0 to 0.2)   | 42 (28 to 61)    | 1.1 (0.7 to 1.6) | 3 (1 to 5)       | 0.1 (0 to 0.1)   | 5 (0 to 17)   | 0.1 (0 to 0.5)   | 6 (2 to 10)     | 0.2 (0.1 to 0.3) | 7 (1 to 18)       | 0.2 (0 to 0.5)   | 5 (1 to 9)      | 0.1 (0 to 0.3)   | 7 (3 to 13)      | 0.2 (0.1 to 0.3) |
| Malaysia | Both   | 2900 (2210 to 3680) | 11.6 (8.9 to 14.6)  | 614 (371 to 905) | 2.4 (1.5 to 3.6) | 6 (2 to 15)      | 0 (0 to 0.1)     | 300 (164 to 483) | 1.2 (0.6 to 1.9) | 77 (9 to 221) | 0.3 (0 to 0.9)   | 190 (45 to 314) | 0.8 (0.2 to 1.2) | 568 (124 to 1320) | 2.4 (0.5 to 5.5) | 140 (68 to 240) | 0.7 (0.3 to 1.1) | 344 (155 to 596) | 1.1 (0.5 to 2)   |
|          | Male   | 2710 (2070 to 3450) | 21.8 (16.7 to 27.7) | 434 (260 to 645) | 3.4 (2.1 to 5.1) | 4 (1 to 9)       | 0 (0 to 0.1)     | 170 (92 to 282)  | 1.4 (0.7 to 2.2) | 54 (7 to 158) | 0.4 (0.1 to 1.2) | 132 (30 to 222) | 1.1 (0.2 to 1.8) | 399 (68 to 984)   | 3.4 (0.6 to 8.2) | 127 (58 to 222) | 1.3 (0.6 to 2.2) | 273 (117 to 485) | 1.8 (0.8 to 3.2) |
|          | Female | 188 (134 to 259)    | 1.6 (1.2 to 2.2)    | 180 (108 to 269) | 1.4 (0.9 to 2.1) | 2 (1 to 6)       | 0 (0 to 0)       | 129 (70 to 210)  | 1 (0.5 to 1.6)   | 23 (3 to 63)  | 0.2 (0 to 0.5)   | 58 (15 to 94)   | 0.5 (0.1 to 0.8) | 169 (34 to 406)   | 1.4 (0.3 to 3.4) | 12 (4 to 24)    | 0.1 (0 to 0.2)   | 71 (30 to 131)   | 0.5 (0.2 to 0.9) |
| Maldives | Both   | 17 (14 to 21)       | 6.8 (5.5 to 8.1)    | 2 (1 to 3)       | 0.7 (0.4 to 1.1) | 1 (0 to 2)       | 0.3 (0.1 to 0.6) | 2 (1 to 3)       | 0.6 (0.3 to 1)   | 1 (0 to 4)    | 0.4 (0 to 1.6)   | 1 (0 to 2)      | 0.5 (0.1 to 0.8) | 3 (1 to 6)        | 1.1 (0.2 to 2.4) | 3 (2 to 4)      | 1.2 (0.7 to 1.8) | 1 (1 to 2)       | 0.4 (0.2 to 0.7) |
|          | Male   | 16 (13 to 19)       | 11.7 (9.5 to 14.2)  | 1 (1 to 2)       | 1 (0.6 to 1.6)   | 1 (0 to 1)       | 0.4 (0.2 to 0.8) | 1 (1 to 2)       | 0.8 (0.4 to 1.2) | 1 (0 to 3)    | 0.6 (0.1 to 2.3) | 1 (0 to 2)      | 0.7 (0.2 to 1.1) | 2 (0 to 5)        | 1.6 (0.3 to 3.7) | 3 (1 to 4)      | 2.1 (1.2 to 3.4) | 1 (1 to 2)       | 0.6 (0.3 to 1.1) |
|          | Female | 1 (1 to 2)          | 1.1 (0.8 to 1.5)    | 0 (0 to 1)       | 0.3 (0.2 to 0.5) | 0 (0 to 0)       | 0.2 (0.1 to 0.4) | 1 (0 to 1)       | 0.4 (0.3 to 0.7) | 0 (0 to 1)    | 0.2 (0 to 0.8)   | 0 (0 to 0)      | 0.2 (0.1 to 0.4) | 1 (0 to 1)        | 0.5 (0.1 to 1.1) | 0 (0 to 0)      | 0 (0 to 0.1)     | 0 (0 to 0)       | 0.1 (0.1 to 0.3) |
| Mali     | Both   | 195 (139 to 259)    | 2.5 (1.8 to 3.3)    | 34 (10 to 74)    | 0.4 (0.1 to 0.9) | 199 (119 to 320) | 2.5 (1.5 to 4)   | 15 (7 to 25)     | 0.2 (0.1 to 0.3) | 26 (2 to 100) | 0.3 (0 to 1.2)   | 33 (11 to 56)   | 0.4 (0.1 to 0.7) | 40 (8 to 94)      | 0.5 (0.1 to 1.3) | 9 (3 to 26)     | 0.1 (0 to 0.4)   | 24 (10 to 42)    | 0.2 (0.1 to 0.4) |
|          | Male   | 184 (129 to 246)    | 4.6 (3.3)           | 26 (7 to 60)     | 0.6 (0.2)        | 137 (77 to 222)  | 3.3 (1.9)        | 9 (4 to 16)      | 0.2 (0.1)        | 18 (1 to 70)  | 0.4 (0 to 1.7)   | 23 (7 to 41)    | 0.6 (0.2 to 1)   | 27 (4 to 67)      | 0.7 (0.1)        | 7 (2 to 24)     | 0.2 (0.1)        | 17 (7 to 33)     | 0.3 (0.1)        |

|                     |        |                        |                              |                  |                           |                      |                           |                |                           |                |                           |                 |                           |                 |                            |                  |                             |                |                           |
|---------------------|--------|------------------------|------------------------------|------------------|---------------------------|----------------------|---------------------------|----------------|---------------------------|----------------|---------------------------|-----------------|---------------------------|-----------------|----------------------------|------------------|-----------------------------|----------------|---------------------------|
|                     |        |                        | to<br>6.1)                   |                  | to<br>1.4)                |                      | to<br>5.3)                |                | to<br>0.4)                |                |                           |                 |                           | to<br>1.8)      |                            | to<br>0.6)       |                             | to<br>0.7)     |                           |
|                     | Female | 11 (7<br>to 16)        | 0.3<br>(0.2<br>to<br>0.4)    | 8 (2 to<br>17)   | 0.2<br>(0.1<br>to<br>0.4) | 62 (37<br>to<br>103) | 1.6<br>(0.9<br>to<br>2.6) | 5 (2 to<br>9)  | 0.1<br>(0.1<br>to<br>0.2) | 8 (1 to<br>29) | 0.2 (0<br>to<br>0.7)      | 10 (3<br>to 16) | 0.2<br>(0.1<br>to<br>0.4) | 13 (2<br>to 31) | 0.4<br>(0.1<br>to<br>0.9)  | 2 (1 to<br>5)    | 0.1 (0<br>to<br>0.2)        | 6 (2 to<br>12) | 0.1<br>(0.1<br>to<br>0.2) |
| Malta               | Both   | 138<br>(122 to<br>155) | 14.7<br>(13 to<br>16.5)      | 18 (11<br>to 25) | 1.9<br>(1.2<br>to<br>2.7) | 0 (0 to<br>0)        | 0 (0 to<br>0)             | 8 (5 to<br>12) | 0.9<br>(0.5<br>to<br>1.4) | 7 (0 to<br>24) | 0.8 (0<br>to<br>2.5)      | 7 (2 to<br>11)  | 0.8<br>(0.2<br>to<br>1.2) | 23 (5<br>to 50) | 2.3<br>(0.5<br>to<br>5.1)  | 61 (42<br>to 81) | 6 (4.1<br>to 8)             | 7 (1 to<br>14) | 0.8<br>(0.1<br>to<br>1.6) |
|                     | Male   | 117<br>(104 to<br>131) | 26.7<br>(23.6<br>to<br>29.7) | 14 (9<br>to 21)  | 3.3<br>(2.1<br>to<br>4.7) | 0 (0 to<br>0)        | 0 (0 to<br>0)             | 6 (4 to<br>10) | 1.5<br>(0.9<br>to<br>2.4) | 6 (0 to<br>19) | 1.3<br>(0.1<br>to<br>4.4) | 6 (1 to<br>9)   | 1.4<br>(0.3<br>to<br>2.1) | 19 (3<br>to 42) | 4.1<br>(0.7<br>to<br>9.3)  | 60 (41<br>to 79) | 13.2<br>(8.9<br>to<br>17.5) | 6 (1 to<br>13) | 1.5<br>(0.2<br>to<br>2.9) |
|                     | Female | 21 (17<br>to 25)       | 4.4<br>(3.7<br>to<br>5.2)    | 3 (2 to<br>5)    | 0.7<br>(0.4<br>to 1)      | 0 (0 to<br>0)        | 0 (0 to<br>0)             | 2 (1 to<br>2)  | 0.4<br>(0.2<br>to<br>0.6) | 1 (0 to<br>5)  | 0.3 (0<br>to<br>0.9)      | 1 (0 to<br>2)   | 0.3<br>(0.1<br>to<br>0.5) | 4 (1 to<br>10)  | 0.8<br>(0.2<br>to<br>1.9)  | 2 (1 to<br>3)    | 0.3<br>(0.2<br>to<br>0.5)   | 1 (0 to<br>2)  | 0.2 (0<br>to<br>0.4)      |
| Marshall<br>Islands | Both   | 5 (3 to<br>8)          | 16.9<br>(10.3<br>to<br>26.1) | 0 (0 to<br>1)    | 1.5<br>(0.4<br>to<br>3.5) | 1 (0 to<br>2)        | 2.8<br>(1.3<br>to<br>5.2) | 1 (0 to<br>1)  | 1.7<br>(0.8<br>to<br>3.1) | 0 (0 to<br>1)  | 1.2<br>(0.1<br>to<br>4.7) | 0 (0 to<br>1)   | 1.6<br>(0.5<br>to 3)      | 2 (0 to<br>5)   | 6.6<br>(1.5<br>to<br>15.9) | 1 (0 to<br>2)    | 3.2<br>(1.4<br>to<br>6.2)   | 0 (0 to<br>1)  | 0.9<br>(0.3<br>to<br>1.8) |
|                     | Male   | 4 (2 to<br>7)          | 28.6<br>(16.8<br>to 45)      | 0 (0 to<br>1)    | 2.3<br>(0.6<br>to<br>5.4) | 1 (0 to<br>1)        | 3.8<br>(1.5<br>to<br>7.8) | 0 (0 to<br>1)  | 2.2 (1<br>to<br>4.2)      | 0 (0 to<br>1)  | 1.7<br>(0.1<br>to<br>6.8) | 0 (0 to<br>1)   | 2.3<br>(0.7<br>to<br>4.6) | 1 (0 to<br>4)   | 9.4<br>(1.7<br>to<br>24.4) | 1 (0 to<br>2)    | 5.9<br>(2.5<br>to<br>11.5)  | 0 (0 to<br>1)  | 1.5<br>(0.5<br>to<br>3.1) |
|                     | Female | 1 (0 to<br>1)          | 4.3<br>(2.6<br>to<br>6.3)    | 0 (0 to<br>0)    | 0.7<br>(0.2<br>to<br>1.7) | 0 (0 to<br>0)        | 1.7<br>(0.9<br>to 3)      | 0 (0 to<br>0)  | 1.1<br>(0.6<br>to 2)      | 0 (0 to<br>0)  | 0.6 (0<br>to<br>2.5)      | 0 (0 to<br>0)   | 0.8<br>(0.3<br>to<br>1.5) | 1 (0 to<br>1)   | 3.4<br>(0.8<br>to<br>7.8)  | 0 (0 to<br>0)    | 0.3<br>(0.1<br>to<br>0.7)   | 0 (0 to<br>0)  | 0.3<br>(0.1<br>to<br>0.6) |
| Mauritania          | Both   | 83 (54<br>to 123)      | 4.2<br>(2.8<br>to<br>6.2)    | 41 (20<br>to 68) | 2.1<br>(1.1<br>to<br>3.5) | 31 (16<br>to 51)     | 1.6<br>(0.8<br>to<br>2.6) | 6 (3 to<br>10) | 0.3<br>(0.1<br>to<br>0.5) | 9 (1 to<br>34) | 0.5 (0<br>to<br>1.7)      | 14 (5<br>to 25) | 0.7<br>(0.3<br>to<br>1.3) | 12 (3<br>to 28) | 0.7<br>(0.1<br>to<br>1.5)  | 4 (2 to<br>10)   | 0.2<br>(0.1<br>to<br>0.6)   | 6 (2 to<br>12) | 0.3<br>(0.1<br>to<br>0.5) |
|                     | Male   | 75 (49<br>to 115)      | 7.6<br>(5.1<br>to<br>11.5)   | 29 (14<br>to 52) | 2.9<br>(1.4<br>to<br>5.2) | 19 (9<br>to 35)      | 1.9<br>(0.9<br>to<br>3.5) | 3 (1 to<br>7)  | 0.3<br>(0.1<br>to<br>0.6) | 6 (0 to<br>24) | 0.6 (0<br>to<br>2.4)      | 10 (3<br>to 18) | 1 (0.3<br>to<br>1.8)      | 7 (1 to<br>19)  | 0.8<br>(0.1<br>to 2)       | 4 (1 to<br>9)    | 0.4<br>(0.1<br>to 1)        | 5 (2 to<br>10) | 0.4<br>(0.2<br>to<br>0.9) |
|                     | Female | 7 (4 to<br>11)         | 0.7<br>(0.4<br>to<br>1.1)    | 12 (6<br>to 21)  | 1.3<br>(0.6<br>to<br>2.2) | 12 (6<br>to 20)      | 1.2<br>(0.6<br>to 2)      | 2 (1 to<br>4)  | 0.2<br>(0.1<br>to<br>0.4) | 3 (0 to<br>12) | 0.3 (0<br>to<br>1.2)      | 5 (2 to<br>8)   | 0.5<br>(0.2<br>to<br>0.9) | 5 (1 to<br>11)  | 0.5<br>(0.1<br>to<br>1.2)  | 1 (0 to<br>2)    | 0.1 (0<br>to<br>0.2)        | 1 (0 to<br>2)  | 0.1 (0<br>to<br>0.2)      |

|                                 |        |                        |                        |                       |                     |                     |                     |                    |                     |                      |                     |                    |                     |                       |                      |                      |                       |                      |                     |
|---------------------------------|--------|------------------------|------------------------|-----------------------|---------------------|---------------------|---------------------|--------------------|---------------------|----------------------|---------------------|--------------------|---------------------|-----------------------|----------------------|----------------------|-----------------------|----------------------|---------------------|
| Mauritius                       | Both   | 108<br>(87 to 131)     | 6.2<br>(5.1 to 7.5)    | 22 (10 to 36)         | 1.3<br>(0.6 to 2.1) | 0 (0 to 1)          | 0 (0 to 0.1)        | 11 (6 to 18)       | 0.7<br>(0.4 to 1.1) | 5 (0 to 19)          | 0.3 (0 to 1.1)      | 12 (4 to 19)       | 0.7<br>(0.2 to 1.1) | 35 (8 to 74)          | 2.1<br>(0.5 to 4.4)  | 3 (2 to 5)           | 0.2<br>(0.1 to 0.3)   | 13 (6 to 21)         | 0.6<br>(0.3 to 1.1) |
|                                 | Male   | 100<br>(80 to 121)     | 13.3<br>(10.8 to 16.1) | 15 (7 to 26)          | 2 (0.9 to 3.4)      | 0 (0 to 1)          | 0 (0 to 0.1)        | 7 (3 to 11)        | 0.9<br>(0.5 to 1.4) | 4 (0 to 13)          | 0.5 (0 to 1.7)      | 8 (3 to 13)        | 1.1<br>(0.4 to 1.7) | 25 (5 to 55)          | 3.4<br>(0.6 to 7.5)  | 3 (1 to 5)           | 0.5<br>(0.2 to 0.8)   | 10 (5 to 17)         | 1.1<br>(0.5 to 1.9) |
|                                 | Female | 8 (6 to 11)            | 0.9<br>(0.6 to 1.1)    | 6 (3 to 11)           | 0.7<br>(0.3 to 1.1) | 0 (0 to 0)          | 0 (0 to 0)          | 5 (3 to 8)         | 0.5<br>(0.3 to 0.8) | 2 (0 to 6)           | 0.2 (0 to 0.6)      | 3 (1 to 6)         | 0.4<br>(0.1 to 0.6) | 10 (2 to 22)          | 1 (0.2 to 2.3)       | 0 (0 to 0)           | 0 (0 to 0)            | 2 (1 to 4)           | 0.2<br>(0.1 to 0.4) |
| Mexico                          | Both   | 4700<br>(3900 to 5570) | 4.2<br>(3.5 to 5)      | 1400<br>(965 to 1930) | 1.2<br>(0.9 to 1.7) | 331<br>(173 to 561) | 0.3<br>(0.2 to 0.5) | 207<br>(83 to 373) | 0.2<br>(0.1 to 0.3) | 591<br>(110 to 1240) | 0.5<br>(0.1 to 1.1) | 305<br>(83 to 476) | 0.3<br>(0.1 to 0.4) | 1580<br>(389 to 3380) | 1.4<br>(0.4 to 3)    | 864<br>(550 to 1240) | 0.8<br>(0.5 to 1.1)   | 794<br>(385 to 1260) | 0.6<br>(0.3 to 1)   |
|                                 | Male   | 3860<br>(3140 to 4690) | 7.6<br>(6.2 to 9.2)    | 920<br>(615 to 1300)  | 1.8<br>(1.2 to 2.5) | 198<br>(98 to 359)  | 0.4<br>(0.2 to 0.7) | 131<br>(50 to 245) | 0.3<br>(0.1 to 0.5) | 382<br>(70 to 806)   | 0.7<br>(0.1 to 1.5) | 195<br>(52 to 318) | 0.4<br>(0.1 to 0.6) | 1060<br>(193 to 2370) | 2.1<br>(0.4 to 4.6)  | 740<br>(424 to 1120) | 1.5<br>(0.9 to 2.2)   | 630<br>(285 to 1030) | 1.1<br>(0.5 to 1.8) |
|                                 | Female | 845<br>(660 to 1040)   | 1.4<br>(1.1 to 1.8)    | 481<br>(321 to 679)   | 0.8<br>(0.5 to 1.1) | 133<br>(68 to 221)  | 0.2<br>(0.1 to 0.4) | 77 (30 to 138)     | 0.1 (0 to 0.2)      | 208<br>(40 to 437)   | 0.3<br>(0.1 to 0.7) | 110<br>(31 to 177) | 0.2 (0 to 0.3)      | 525<br>(107 to 1190)  | 0.9<br>(0.2 to 2)    | 124<br>(62 to 191)   | 0.2<br>(0.1 to 0.3)   | 163<br>(75 to 272)   | 0.2<br>(0.1 to 0.4) |
| Federatead States of Micronesia | Both   | 13 (8 to 21)           | 20.5<br>(12.5 to 30.2) | 1 (0 to 3)            | 1.9<br>(0.5 to 4.8) | 2 (1 to 4)          | 2.7<br>(1.1 to 5.2) | 1 (0 to 2)         | 1.5<br>(0.7 to 2.8) | 1 (0 to 3)           | 1 (0.1 to 4.1)      | 1 (0 to 2)         | 1.6<br>(0.5 to 2.9) | 3 (1 to 8)            | 4.9<br>(1.1 to 11.6) | 2 (1 to 4)           | 3.4<br>(1.4 to 6.5)   | 1 (0 to 3)           | 1.5<br>(0.5 to 2.9) |
|                                 | Male   | 11 (6 to 17)           | 35.8<br>(21.8 to 55.7) | 1 (0 to 2)            | 3.1<br>(0.8 to 7.9) | 1 (0 to 3)          | 3.9<br>(1.4 to 8.4) | 1 (0 to 1)         | 2.2<br>(0.9 to 4.2) | 0 (0 to 2)           | 1.6<br>(0.1 to 6.5) | 1 (0 to 2)         | 2.5<br>(0.7 to 4.9) | 2 (0 to 6)            | 7.7<br>(1.3 to 19.7) | 2 (1 to 4)           | 7.4<br>(3.1 to 14.1)  | 1 (0 to 2)           | 2.4<br>(0.7 to 4.9) |
|                                 | Female | 3 (2 to 4)             | 8.3<br>(5.1 to 12)     | 0 (0 to 1)            | 0.9<br>(0.2 to 2.5) | 1 (0 to 1)          | 1.8<br>(0.8 to 3.2) | 0 (0 to 1)         | 1 (0.4 to 1.8)      | 0 (0 to 1)           | 0.6 (0 to 2.4)      | 0 (0 to 1)         | 0.9<br>(0.3 to 1.6) | 1 (0 to 2)            | 2.7<br>(0.6 to 6.7)  | 0 (0 to 0)           | 0.3<br>(0.1 to 0.8)   | 0 (0 to 1)           | 0.6<br>(0.2 to 1.2) |
| Monaco                          | Both   | 41 (34 to 49)          | 44.3<br>(35.8 to 53.7) | 5 (2 to 8)            | 5.1<br>(2.7 to 8.1) | 0 (0 to 0)          | 0 (0 to 0)          | 2 (1 to 4)         | 2.9<br>(1.6 to 4.4) | 3 (0 to 9)           | 3 (0.3 to 10)       | 1 (0 to 1)         | 0.7<br>(0.2 to 1.3) | 5 (1 to 12)           | 5.2<br>(1.2 to 11.7) | 15 (10 to 21)        | 14.7<br>(9.5 to 20.7) | 2 (0 to 4)           | 2.4<br>(0.4 to 4.9) |
|                                 | Male   | 29 (24 to 34)          | 65.6<br>(54.1 to 77.1) | 3 (2 to 5)            | 7 (3.7 to 11.1)     | 0 (0 to 0)          | 0 (0 to 0)          | 2 (1 to 3)         | 3.9<br>(2.2 to 5.6) | 2 (0 to 6)           | 4.1<br>(0.5 to 7.7) | 0 (0 to 1)         | 0.9<br>(0.2 to 1.6) | 3 (1 to 8)            | 7.6<br>(1.3 to 18)   | 15 (10 to 20)        | 31<br>(20.1 to 41.9)  | 2 (0 to 3)           | 4 (0.6 to 8.1)      |

|            |        |                              |                              |                             |                             |                      |                           |                           |                            |                       |                            |                      |                           |                            |                             |                     |                           |                           |                           |
|------------|--------|------------------------------|------------------------------|-----------------------------|-----------------------------|----------------------|---------------------------|---------------------------|----------------------------|-----------------------|----------------------------|----------------------|---------------------------|----------------------------|-----------------------------|---------------------|---------------------------|---------------------------|---------------------------|
|            |        |                              | to<br>78.2)                  |                             |                             |                      |                           |                           | to<br>6.1)                 |                       | to<br>13.6)                |                      | to<br>1.9)                |                            |                             |                     | to<br>43.4)               |                           |                           |
|            | Female | 13 (9<br>to 16)              | 25.8<br>(19.2<br>to 33)      | 2 (1 to<br>3)               | 3.4<br>(1.8<br>to 5.5)      | 0 (0 to<br>0)        | 0 (0 to<br>0)             | 1 (0 to<br>1)             | 1.9 (1<br>to 3)            | 1 (0 to<br>3)         | 2 (0.2<br>to<br>6.7)       | 0 (0 to<br>0)        | 0.5<br>(0.1<br>to 1)      | 2 (0 to<br>4)              | 3.1<br>(0.6<br>to<br>7.5)   | 1 (0 to<br>1)       | 1.2<br>(0.5<br>to<br>2.3) | 0 (0 to<br>1)             | 1 (0.1<br>to<br>2.1)      |
| Mongolia   | Both   | 411<br>(314 to<br>535)       | 20.4<br>(15.8<br>to 26)      | 120<br>(75 to<br>177)       | 5.9<br>(3.8<br>to<br>8.6)   | 50 (22<br>to 89)     | 2.5<br>(1.1<br>to<br>4.5) | 30 (16<br>to 49)          | 1.5<br>(0.8<br>to<br>2.4)  | 65 (5<br>to<br>201)   | 3.2<br>(0.2<br>to 10)      | 43 (17<br>to 72)     | 2.1<br>(0.8<br>to<br>3.5) | 25 (5<br>to 61)            | 1.4<br>(0.3<br>to<br>3.2)   | 25 (12<br>to 47)    | 1.3<br>(0.6<br>to<br>2.4) | 38 (17<br>to 67)          | 1.4<br>(0.6<br>to<br>2.4) |
|            | Male   | 380<br>(286 to<br>496)       | 46.5<br>(36.3<br>to<br>58.8) | 96 (59<br>to<br>141)        | 11.4<br>(7.2<br>to<br>16.4) | 36 (15<br>to 67)     | 4.3<br>(1.8<br>to<br>7.9) | 19 (10<br>to 33)          | 2.3<br>(1.2<br>to<br>3.8)  | 51 (4<br>to<br>157)   | 6 (0.4<br>to<br>18.9)      | 34 (13<br>to 57)     | 4 (1.5<br>to<br>6.6)      | 20 (3<br>to 51)            | 2.6<br>(0.4<br>to<br>6.7)   | 24 (11<br>to 45)    | 3.1<br>(1.4<br>to<br>5.6) | 32 (14<br>to 58)          | 2.6<br>(1.1<br>to<br>4.6) |
|            | Female | 31 (23<br>to 41)             | 3 (2.2<br>to<br>4.1)         | 24 (15<br>to 37)            | 2.3<br>(1.4<br>to<br>3.4)   | 14 (7<br>to 24)      | 1.3<br>(0.6<br>to<br>2.3) | 10 (6<br>to 17)           | 0.9<br>(0.5<br>to<br>1.4)  | 14 (1<br>to 43)       | 1.3<br>(0.1<br>to 4)       | 9 (4 to<br>16)       | 0.9<br>(0.4<br>to<br>1.4) | 5 (1 to<br>13)             | 0.5<br>(0.1<br>to<br>1.3)   | 1 (1 to<br>3)       | 0.1<br>(0.1<br>to<br>0.2) | 6 (3 to<br>12)            | 0.4<br>(0.2<br>to<br>0.8) |
| Montenegro | Both   | 432<br>(355 to<br>527)       | 42.8<br>(35.3<br>to<br>52.3) | 75 (50<br>to<br>102)        | 7.5<br>(5.1<br>to<br>10.3)  | 20 (6<br>to 46)      | 2 (0.6<br>to<br>4.6)      | 46 (26<br>to 69)          | 4.6<br>(2.6<br>to 7)       | 22 (2<br>to 64)       | 2.2<br>(0.2<br>to<br>6.4)  | 7 (2 to<br>12)       | 0.7<br>(0.2<br>to<br>1.2) | 61 (13<br>to<br>138)       | 5.9<br>(1.3<br>to<br>13.5)  | 11 (6<br>to 18)     | 1.1<br>(0.6<br>to<br>1.8) | 16 (3<br>to 33)           | 1.6<br>(0.3<br>to<br>3.2) |
|            | Male   | 337<br>(272 to<br>415)       | 74.3<br>(60.1<br>to<br>91.4) | 57 (38<br>to 79)            | 12.6<br>(8.5<br>to<br>17.4) | 14 (4<br>to 31)      | 3.1<br>(0.9<br>to<br>6.9) | 34 (19<br>to 53)          | 7.5<br>(4.2<br>to<br>11.6) | 16 (2<br>to 49)       | 3.6<br>(0.4<br>to<br>10.8) | 5 (1 to<br>9)        | 1.1<br>(0.3<br>to 2)      | 47 (8<br>to<br>109)        | 10.3<br>(1.8<br>to<br>24.1) | 8 (4 to<br>15)      | 1.8<br>(0.9<br>to<br>3.3) | 13 (2<br>to 27)           | 2.7<br>(0.5<br>to<br>5.6) |
|            | Female | 94 (75<br>to 118)            | 17.3<br>(13.8<br>to<br>21.7) | 18 (12<br>to 25)            | 3.4<br>(2.2<br>to<br>4.7)   | 7 (2 to<br>14)       | 1.2<br>(0.4<br>to<br>2.6) | 12 (7<br>to 18)           | 2.2<br>(1.3<br>to<br>3.4)  | 5 (1 to<br>16)        | 1 (0.1<br>to<br>2.9)       | 2 (0 to<br>3)        | 0.4<br>(0.1<br>to<br>0.6) | 14 (3<br>to 33)            | 2.5<br>(0.5<br>to<br>5.9)   | 3 (2 to<br>5)       | 0.5<br>(0.3<br>to<br>0.9) | 3 (0 to<br>6)             | 0.6<br>(0.1<br>to<br>1.2) |
| Morocco    | Both   | 3210<br>(2250<br>to<br>4200) | 10.1<br>(7.1<br>to<br>13.1)  | 1120<br>(717<br>to<br>1590) | 3.6<br>(2.3<br>to 5)        | 60 (23<br>to<br>128) | 0.2<br>(0.1<br>to<br>0.4) | 293<br>(154<br>to<br>478) | 0.9<br>(0.5<br>to<br>1.5)  | 315<br>(33 to<br>905) | 1 (0.1<br>to<br>2.9)       | 77 (18<br>to<br>141) | 0.3<br>(0.1<br>to<br>0.4) | 576<br>(116<br>to<br>1370) | 1.9<br>(0.4<br>to<br>4.6)   | 43 (6<br>to<br>216) | 0.2 (0<br>to<br>0.8)      | 369<br>(156<br>to<br>661) | 1 (0.4<br>to<br>1.8)      |
|            | Male   | 3170<br>(2220<br>to<br>4150) | 20.1<br>(14.1<br>to<br>26.1) | 984<br>(620<br>to<br>1410)  | 6.3 (4<br>to<br>8.9)        | 49 (19<br>to<br>109) | 0.3<br>(0.1<br>to<br>0.7) | 247<br>(129<br>to<br>405) | 1.6<br>(0.8<br>to<br>2.6)  | 276<br>(28 to<br>790) | 1.8<br>(0.2<br>to<br>5.1)  | 66 (14<br>to<br>123) | 0.4<br>(0.1<br>to<br>0.8) | 505<br>(89 to<br>1230)     | 3.4<br>(0.6<br>to<br>8.2)   | 39 (3<br>to<br>212) | 0.3 (0<br>to<br>1.7)      | 355<br>(148<br>to<br>640) | 1.9<br>(0.8<br>to<br>3.5) |
|            | Female | 41 (28<br>to 58)             | 0.3<br>(0.2<br>to<br>0.4)    | 136<br>(88 to<br>197)       | 0.9<br>(0.6<br>to<br>1.3)   | 10 (4<br>to 20)      | 0.1 (0<br>to<br>0.1)      | 46 (25<br>to 74)          | 0.3<br>(0.2<br>to<br>0.5)  | 39 (4<br>to<br>115)   | 0.3 (0<br>to<br>0.8)       | 12 (3<br>to 21)      | 0.1 (0<br>to<br>0.1)      | 70 (14<br>to<br>167)       | 0.5<br>(0.1<br>to<br>1.2)   | 5 (2 to<br>10)      | 0 (0<br>to<br>0.1)        | 14 (5<br>to 27)           | 0.1 (0<br>to<br>0.1)      |

|            |        |                        |                        |                       |                     |                        |                      |                     |                     |                    |                     |                     |                     |                       |                      |                     |                     |                      |                     |
|------------|--------|------------------------|------------------------|-----------------------|---------------------|------------------------|----------------------|---------------------|---------------------|--------------------|---------------------|---------------------|---------------------|-----------------------|----------------------|---------------------|---------------------|----------------------|---------------------|
| Mozambique | Both   | 306<br>(227 to 409)    | 3.2<br>(2.4 to 4.2)    | 25 (9 to 53)          | 0.2<br>(0.1 to 0.5) | 296<br>(186 to 439)    | 3 (1.9 to 4.3)       | 15 (6 to 28)        | 0.1<br>(0.1 to 0.3) | 31 (2 to 120)      | 0.3 (0 to 1.2)      | 53 (18 to 91)       | 0.5<br>(0.2 to 0.9) | 61 (12 to 145)        | 0.7<br>(0.1 to 1.6)  | 49 (19 to 151)      | 0.6<br>(0.2 to 1.8) | 46 (20 to 82)        | 0.4<br>(0.2 to 0.7) |
|            | Male   | 275<br>(202 to 365)    | 7 (5.3 to 9)           | 19 (7 to 41)          | 0.5<br>(0.2 to 1)   | 201<br>(130 to 295)    | 4.8<br>(3.1 to 6.9)  | 9 (4 to 17)         | 0.2<br>(0.1 to 0.4) | 22 (1 to 85)       | 0.5 (0 to 2.1)      | 37 (13 to 63)       | 0.9<br>(0.3 to 1.5) | 47 (7 to 113)         | 1.2<br>(0.2 to 3)    | 38 (12 to 141)      | 1.2<br>(0.4 to 4.1) | 31 (13 to 58)        | 0.6<br>(0.2 to 1)   |
|            | Female | 31 (18 to 49)          | 0.6<br>(0.3 to 0.9)    | 6 (2 to 13)           | 0.1 (0 to 0.2)      | 95 (52 to 156)         | 1.7<br>(0.9 to 2.7)  | 6 (2 to 11)         | 0.1 (0 to 0.2)      | 10 (1 to 36)       | 0.2 (0 to 0.6)      | 16 (5 to 31)        | 0.3<br>(0.1 to 0.5) | 14 (3 to 38)          | 0.3 (0 to 0.7)       | 11 (3 to 23)        | 0.2<br>(0.1 to 0.5) | 14 (5 to 29)         | 0.2<br>(0.1 to 0.4) |
| Myanmar    | Both   | 6170<br>(4470 to 8600) | 14.3<br>(10.4 to 19.7) | 1120<br>(609 to 1790) | 2.5<br>(1.4 to 4)   | 2110<br>(1200 to 3310) | 4.7<br>(2.7 to 7.4)  | 415<br>(195 to 706) | 0.9<br>(0.4 to 1.6) | 231<br>(18 to 848) | 0.5 (0 to 1.9)      | 583<br>(192 to 999) | 1.3<br>(0.4 to 2.2) | 1000<br>(225 to 2370) | 2.4<br>(0.5 to 5.8)  | 372<br>(188 to 646) | 0.9<br>(0.5 to 1.6) | 579<br>(240 to 1060) | 1.1<br>(0.5 to 2)   |
|            | Male   | 4930<br>(3480 to 7280) | 26.8<br>(18.9 to 39.4) | 811<br>(425 to 1380)  | 4.3<br>(2.2 to 7.4) | 1340<br>(704 to 2300)  | 7.1<br>(3.7 to 12.1) | 240<br>(107 to 439) | 1.3<br>(0.6 to 2.4) | 157<br>(13 to 559) | 0.8<br>(0.1 to 2.9) | 393<br>(127 to 731) | 2.1<br>(0.7 to 3.8) | 650<br>(107 to 1700)  | 3.8<br>(0.6 to 9.7)  | 342<br>(162 to 610) | 2.1 (1 to 3.8)      | 430<br>(169 to 818)  | 1.8<br>(0.7 to 3.5) |
|            | Female | 1240<br>(922 to 1680)  | 5.2<br>(3.9 to 7.2)    | 304<br>(165 to 500)   | 1.2<br>(0.6 to 2)   | 767<br>(486 to 1100)   | 3 (1.9 to 4.4)       | 175<br>(84 to 288)  | 0.7<br>(0.3 to 1.1) | 74 (6 to 264)      | 0.3 (0 to 1)        | 190<br>(65 to 313)  | 0.8<br>(0.3 to 1.3) | 351<br>(72 to 840)    | 1.5<br>(0.3 to 3.5)  | 30 (14 to 57)       | 0.1<br>(0.1 to 0.2) | 149<br>(59 to 278)   | 0.5<br>(0.2 to 1)   |
| Namibia    | Both   | 47 (37 to 59)          | 3.7<br>(2.9 to 4.6)    | 14 (8 to 21)          | 1 (0.6 to 1.6)      | 12 (6 to 21)           | 0.9<br>(0.5 to 1.5)  | 3 (1 to 5)          | 0.2<br>(0.1 to 0.4) | 4 (0 to 17)        | 0.3 (0 to 1.2)      | 7 (2 to 11)         | 0.5<br>(0.2 to 0.8) | 9 (2 to 20)           | 0.7<br>(0.2 to 1.6)  | 28 (15 to 42)       | 2.2<br>(1.2 to 3.3) | 2 (1 to 4)           | 0.2<br>(0.1 to 0.3) |
|            | Male   | 34 (27 to 43)          | 6.7<br>(5.3 to 8.3)    | 10 (5 to 15)          | 1.8 (1 to 2.7)      | 8 (4 to 13)            | 1.4<br>(0.7 to 2.4)  | 2 (1 to 3)          | 0.3<br>(0.2 to 0.6) | 3 (0 to 11)        | 0.5 (0 to 2.1)      | 4 (2 to 7)          | 0.8<br>(0.3 to 1.3) | 6 (1 to 15)           | 1.2<br>(0.2 to 2.9)  | 26 (13 to 40)       | 5.2<br>(2.7 to 7.8) | 2 (1 to 3)           | 0.3<br>(0.1 to 0.5) |
|            | Female | 13 (9 to 17)           | 1.7<br>(1.2 to 2.3)    | 4 (2 to 7)            | 0.5<br>(0.3 to 0.9) | 5 (3 to 8)             | 0.6<br>(0.3 to 1)    | 1 (0 to 2)          | 0.1<br>(0.1 to 0.2) | 1 (0 to 6)         | 0.2 (0 to 0.7)      | 2 (1 to 4)          | 0.3<br>(0.1 to 0.5) | 3 (1 to 7)            | 0.4<br>(0.1 to 1)    | 2 (1 to 4)          | 0.3<br>(0.1 to 0.5) | 1 (0 to 1)           | 0.1 (0 to 0.1)      |
| Nauru      | Both   | 1 (0 to 1)             | 24.3<br>(16.2 to 32.4) | 0 (0 to 0)            | 1.1<br>(0.2 to 2.8) | 0 (0 to 0)             | 0.3<br>(0.1 to 0.9)  | 0 (0 to 0)          | 2 (0.9 to 3.5)      | 0 (0 to 0)         | 1.1<br>(0.1 to 4.6) | 0 (0 to 0)          | 1.7<br>(0.5 to 3)   | 0 (0 to 0)            | 5.6<br>(1.2 to 12.8) | 0 (0 to 0)          | 2.8<br>(1.4 to 5.3) | 0 (0 to 0)           | 1.8<br>(0.7 to 3.4) |
|            | Male   | 1 (0 to 1)             | 39.7<br>(25.9 to 49.1) | 0 (0 to 0)            | 1.6<br>(0.3 to 2.9) | 0 (0 to 0)             | 0.4<br>(0.1 to 0.7)  | 0 (0 to 0)          | 2.8<br>(1.2 to 4.4) | 0 (0 to 0)         | 1.7<br>(0.1 to 3.3) | 0 (0 to 0)          | 2.6<br>(0.7 to 5.5) | 0 (0 to 0)            | 8.7<br>(1.5 to 15.9) | 0 (0 to 0)          | 5.7<br>(2.6 to 8.8) | 0 (0 to 0)           | 3.1<br>(1.1 to 6)   |

|             |        |                      |                     |                    |                  |                  |                  |                  |                  |                 |                  |                  |                  |                    |                  |                     |                     |                 |                  |
|-------------|--------|----------------------|---------------------|--------------------|------------------|------------------|------------------|------------------|------------------|-----------------|------------------|------------------|------------------|--------------------|------------------|---------------------|---------------------|-----------------|------------------|
|             |        |                      | to<br>54.7)         |                    | to<br>4.3)       |                  | to<br>1.2)       |                  | to<br>4.9)       |                 | to<br>7.1)       |                  | to<br>4.6)       |                    | to<br>21.3)      |                     | to<br>11.2)         |                 |                  |
|             | Female | 0 (0 to 0)           | 11.2 (6.7 to 16.9)  | 0 (0 to 0)         | 0.6 (0.2 to 1.6) | 0 (0 to 0)       | 0.2 (0 to 0.7)   | 0 (0 to 0)       | 1.4 (0.6 to 2.5) | 0 (0 to 0)      | 0.6 (0 to 2.7)   | 0 (0 to 0)       | 1 (0.3 to 1.8)   | 0 (0 to 0)         | 2.9 (0.5 to 7.4) | 0 (0 to 0)          | 0.4 (0.1 to 0.9)    | 0 (0 to 0)      | 0.8 (0.3 to 1.7) |
| Nepal       | Both   | 973 (710 to 1270)    | 4.8 (3.5 to 6.2)    | 298 (156 to 466)   | 1.4 (0.7 to 2.2) | 329 (183 to 522) | 1.5 (0.9 to 2.5) | 65 (31 to 112)   | 0.3 (0.1 to 0.5) | 108 (11 to 379) | 0.5 (0.1 to 1.8) | 94 (27 to 163)   | 0.4 (0.1 to 0.8) | 158 (33 to 370)    | 0.8 (0.2 to 1.8) | 91 (43 to 156)      | 0.5 (0.2 to 0.8)    | 127 (53 to 232) | 0.5 (0.2 to 0.9) |
|             | Male   | 750 (545 to 964)     | 7.6 (5.6 to 9.7)    | 218 (115 to 338)   | 2.1 (1.1 to 3.3) | 211 (113 to 341) | 2.1 (1.1 to 3.4) | 45 (21 to 76)    | 0.4 (0.2 to 0.8) | 74 (7 to 256)   | 0.7 (0.1 to 2.5) | 64 (19 to 110)   | 0.6 (0.2 to 1.1) | 115 (19 to 278)    | 1.2 (0.2 to 2.8) | 76 (33 to 134)      | 0.9 (0.4 to 1.5)    | 91 (37 to 170)  | 0.8 (0.3 to 1.4) |
|             | Female | 223 (143 to 335)     | 2.2 (1.4 to 3.2)    | 80 (38 to 138)     | 0.7 (0.3 to 1.2) | 118 (65 to 196)  | 1.1 (0.6 to 1.8) | 21 (9 to 38)     | 0.2 (0.1 to 0.3) | 34 (3 to 123)   | 0.3 (0 to 1.1)   | 30 (9 to 53)     | 0.3 (0.1 to 0.5) | 44 (8 to 113)      | 0.4 (0.1 to 1.1) | 15 (6 to 32)        | 0.2 (0.1 to 0.3)    | 36 (13 to 70)   | 0.3 (0.1 to 0.5) |
| Netherlands | Both   | 9550 (8850 to 10300) | 27.3 (25.4 to 29.3) | 1090 (720 to 1560) | 3.2 (2.1 to 4.5) | 1 (0 to 4)       | 0 (0 to 0)       | 445 (255 to 681) | 1.4 (0.8 to 2.1) | 271 (38 to 705) | 0.8 (0.1 to 2)   | 453 (107 to 682) | 1.3 (0.3 to 2)   | 1000 (229 to 2220) | 2.8 (0.6 to 6.2) | 4290 (3180 to 5320) | 11.6 (8.6 to 14.5)  | 451 (79 to 870) | 1.4 (0.2 to 2.6) |
|             | Male   | 6040 (5570 to 6510)  | 37.3 (34.3 to 40.3) | 663 (436 to 957)   | 4.1 (2.7 to 6)   | 1 (0 to 2)       | 0 (0 to 0)       | 277 (156 to 426) | 1.8 (1 to 2.7)   | 165 (24 to 431) | 1 (0.1 to 2.7)   | 271 (64 to 415)  | 1.7 (0.4 to 2.6) | 666 (110 to 1570)  | 4 (0.7 to 9.5)   | 3800 (2800 to 4760) | 22.9 (16.8 to 28.8) | 310 (51 to 610) | 1.9 (0.3 to 3.7) |
|             | Female | 3520 (3190 to 3860)  | 19.6 (17.8 to 21.4) | 427 (279 to 611)   | 2.4 (1.6 to 3.4) | 1 (0 to 2)       | 0 (0 to 0)       | 168 (97 to 257)  | 1 (0.6 to 1.6)   | 106 (15 to 276) | 0.6 (0.1 to 1.6) | 182 (43 to 280)  | 1 (0.2 to 1.6)   | 334 (63 to 790)    | 1.8 (0.3 to 4.2) | 494 (280 to 738)    | 2.4 (1.4 to 3.6)    | 141 (21 to 283) | 0.9 (0.1 to 1.7) |
| New Zealand | Both   | 1200 (1090 to 1290)  | 15 (13.8 to 16.2)   | 47 (8 to 101)      | 0.6 (0.1 to 1.3) | 0 (0 to 1)       | 0 (0 to 0)       | 56 (32 to 87)    | 0.7 (0.4 to 1.2) | 59 (6 to 193)   | 0.7 (0.1 to 2.4) | 68 (17 to 103)   | 0.9 (0.2 to 1.3) | 149 (35 to 327)    | 1.8 (0.4 to 4)   | 509 (378 to 634)    | 6.1 (4.5 to 7.6)    | 83 (15 to 159)  | 1.1 (0.2 to 2.1) |
|             | Male   | 666 (608 to 728)     | 17.8 (16.3 to 19.5) | 25 (4 to 53)       | 0.7 (0.1 to 1.4) | 0 (0 to 1)       | 0 (0 to 0)       | 33 (18 to 50)    | 0.9 (0.5 to 1.4) | 31 (3 to 103)   | 0.8 (0.1 to 2.8) | 35 (9 to 54)     | 1 (0.2 to 1.4)   | 84 (14 to 198)     | 2.2 (0.4 to 5.2) | 440 (319 to 559)    | 11.4 (8.3 to 14.6)  | 52 (9 to 101)   | 1.4 (0.2 to 2.7) |
|             | Female | 529 (470 to 582)     | 12.6 (11.3 to 13.9) | 22 (4 to 47)       | 0.5 (0.1 to 1.1) | 0 (0 to 1)       | 0 (0 to 0)       | 23 (13 to 36)    | 0.6 (0.3 to 0.9) | 28 (3 to 89)    | 0.7 (0.1 to 2.1) | 33 (8 to 51)     | 0.8 (0.2 to 1.2) | 65 (12 to 154)     | 1.5 (0.3 to 3.5) | 69 (39 to 101)      | 1.5 (0.9 to 2.3)    | 31 (5 to 61)    | 0.8 (0.1 to 1.5) |

|           |        |                       |                        |                       |                     |                       |                      |                    |                     |                    |                     |                    |                     |                      |                     |                     |                     |                     |                     |
|-----------|--------|-----------------------|------------------------|-----------------------|---------------------|-----------------------|----------------------|--------------------|---------------------|--------------------|---------------------|--------------------|---------------------|----------------------|---------------------|---------------------|---------------------|---------------------|---------------------|
| Nicaragua | Both   | 141<br>(112 to 174)   | 3.5<br>(2.8 to 4.3)    | 33 (16 to 54)         | 0.8<br>(0.4 to 1.3) | 54 (31 to 82)         | 1.3<br>(0.8 to 2)    | 13 (6 to 20)       | 0.3<br>(0.2 to 0.5) | 17 (1 to 66)       | 0.4 (0 to 1.6)      | 22 (8 to 35)       | 0.5<br>(0.2 to 0.8) | 45 (11 to 99)        | 1.2<br>(0.3 to 2.5) | 9 (5 to 14)         | 0.2<br>(0.1 to 0.4) | 22 (11 to 37)       | 0.5<br>(0.2 to 0.8) |
|           | Male   | 124<br>(97 to 153)    | 7.2<br>(5.7 to 8.8)    | 22 (11 to 36)         | 1.2<br>(0.6 to 2.1) | 30 (16 to 49)         | 1.7<br>(0.9 to 2.8)  | 8 (4 to 12)        | 0.4<br>(0.2 to 0.7) | 10 (1 to 41)       | 0.6 (0 to 2.3)      | 13 (5 to 21)       | 0.8<br>(0.3 to 1.2) | 29 (5 to 67)         | 1.7<br>(0.3 to 3.9) | 7 (4 to 12)         | 0.5<br>(0.2 to 0.8) | 15 (7 to 26)        | 0.7<br>(0.3 to 1.2) |
|           | Female | 17 (13 to 23)         | 0.7<br>(0.5 to 1)      | 11 (5 to 18)          | 0.5<br>(0.2 to 0.8) | 24 (14 to 34)         | 1 (0.6 to 1.5)       | 5 (3 to 8)         | 0.2<br>(0.1 to 0.3) | 6 (1 to 25)        | 0.3 (0 to 1.1)      | 9 (3 to 13)        | 0.4<br>(0.1 to 0.6) | 16 (3 to 37)         | 0.7<br>(0.1 to 1.7) | 2 (1 to 3)          | 0.1 (0 to 0.1)      | 7 (3 to 13)         | 0.3<br>(0.1 to 0.5) |
| Niger     | Both   | 149<br>(90 to 231)    | 2.3<br>(1.4 to 3.5)    | 33 (7 to 90)          | 0.5<br>(0.1 to 1.3) | 241<br>(122 to 467)   | 3.5<br>(1.7 to 6.7)  | 17 (8 to 30)       | 0.2<br>(0.1 to 0.4) | 29 (2 to 108)      | 0.4 (0 to 1.6)      | 41 (13 to 75)      | 0.6<br>(0.2 to 1.1) | 33 (6 to 87)         | 0.5<br>(0.1 to 1.4) | 10 (3 to 29)        | 0.2<br>(0.1 to 0.5) | 32 (13 to 64)       | 0.4<br>(0.1 to 0.7) |
|           | Male   | 145<br>(87 to 225)    | 4.6<br>(2.8 to 6.9)    | 27 (6 to 75)          | 0.8<br>(0.2 to 2.3) | 187<br>(93 to 367)    | 5.7<br>(2.8 to 11.1) | 12 (5 to 23)       | 0.3<br>(0.2 to 0.7) | 23 (2 to 87)       | 0.7 (0 to 2.6)      | 33 (10 to 62)      | 1 (0.3 to 1.9)      | 26 (4 to 72)         | 0.9<br>(0.1 to 2.4) | 8 (2 to 27)         | 0.3<br>(0.1 to 0.9) | 26 (10 to 54)       | 0.6<br>(0.2 to 1.2) |
|           | Female | 4 (2 to 8)            | 0.1<br>(0.1 to 0.2)    | 5 (1 to 14)           | 0.1 (0 to 0.4)      | 53 (26 to 111)        | 1.5<br>(0.7 to 3.1)  | 4 (2 to 8)         | 0.1 (0 to 0.2)      | 6 (0 to 24)        | 0.2 (0 to 0.7)      | 9 (3 to 17)        | 0.2<br>(0.1 to 0.5) | 7 (1 to 19)          | 0.2 (0 to 0.6)      | 1 (0 to 3)          | 0 (0 to 0.1)        | 6 (2 to 13)         | 0.1 (0 to 0.3)      |
| Nigeria   | Both   | 1280<br>(934 to 1790) | 1.7<br>(1.3 to 2.4)    | 1010<br>(563 to 1540) | 1.3<br>(0.8 to 2)   | 1010<br>(585 to 1560) | 1.3<br>(0.8 to 2)    | 172<br>(88 to 286) | 0.2<br>(0.1 to 0.4) | 281<br>(60 to 587) | 0.4<br>(0.1 to 0.8) | 283<br>(77 to 472) | 0.4<br>(0.1 to 0.6) | 354<br>(74 to 861)   | 0.5<br>(0.1 to 1.3) | 88 (39 to 250)      | 0.1<br>(0.1 to 0.4) | 186<br>(85 to 322)  | 0.2<br>(0.1 to 0.3) |
|           | Male   | 1180<br>(840 to 1680) | 3.3<br>(2.4 to 4.6)    | 702<br>(373 to 1110)  | 2 (1.1 to 3.1)      | 704<br>(384 to 1160)  | 1.9<br>(1.1 to 3.2)  | 126<br>(62 to 217) | 0.3<br>(0.2 to 0.6) | 194<br>(39 to 420) | 0.5<br>(0.1 to 1.1) | 195<br>(55 to 339) | 0.5<br>(0.2 to 0.9) | 258<br>(41 to 658)   | 0.8<br>(0.1 to 2)   | 67 (23 to 228)      | 0.2<br>(0.1 to 0.7) | 127<br>(52 to 235)  | 0.3<br>(0.1 to 0.5) |
|           | Female | 100<br>(63 to 151)    | 0.3<br>(0.2 to 0.4)    | 304<br>(164 to 478)   | 0.8<br>(0.4 to 1.2) | 306<br>(178 to 477)   | 0.7<br>(0.4 to 1.1)  | 46 (23 to 78)      | 0.1<br>(0.1 to 0.2) | 87 (19 to 185)     | 0.2 (0 to 0.4)      | 89 (28 to 151)     | 0.2<br>(0.1 to 0.4) | 96 (17 to 250)       | 0.3 (0 to 0.7)      | 20 (9 to 37)        | 0.1 (0 to 0.1)      | 59 (25 to 107)      | 0.1 (0 to 0.2)      |
| Niue      | Both   | 0 (0 to 0)            | 16.9<br>(13.4 to 20.9) | 0 (0 to 0)            | 1.1<br>(0.2 to 2.7) | 0 (0 to 0)            | 0.2 (0 to 0.6)       | 0 (0 to 0)         | 2.2<br>(1.2 to 3.5) | 0 (0 to 0)         | 1 (0.1 to 3.7)      | 0 (0 to 0)         | 1.3<br>(0.3 to 2.1) | 5.9<br>(1.5 to 12.4) | 0 (0 to 0)          | 1.7<br>(0.9 to 3.2) | 0 (0 to 0)          | 1.2<br>(0.5 to 2.1) |                     |
|           | Male   | 0 (0 to 0)            | 30<br>(24.6)           | 0 (0 to 0)            | 1.6<br>(0.3)        | 0 (0 to 0)            | 0.3 (0 to 0.8)       | 0 (0 to 0)         | 3 (1.7 to 4.7)      | 0 (0 to 0)         | 1.4<br>(0.1)        | 0 (0 to 0)         | 1.9<br>(0.5)        | 9 (1.7 to 19.8)      | 0 (0 to 0)          | 3.8<br>(1.9)        | 0 (0 to 0)          | 1.8<br>(0.8)        |                     |

|                          |        |                     |                     |                  |                  |               |                  |                 |                  |                 |                   |                |                  |                 |                   |                  |                   |                |                  |
|--------------------------|--------|---------------------|---------------------|------------------|------------------|---------------|------------------|-----------------|------------------|-----------------|-------------------|----------------|------------------|-----------------|-------------------|------------------|-------------------|----------------|------------------|
|                          |        |                     | to<br>35.9)         |                  | to<br>3.9)       |               |                  |                 |                  |                 | to<br>5.6)        |                | to<br>3.1)       |                 |                   |                  | to<br>7.4)        |                | to<br>3.2)       |
|                          | Female | 0 (0 to 0)          | 7 (4.7 to 9.8)      | 0 (0 to 0)       | 0.7 (0.2 to 1.7) | 0 (0 to 0)    | 0.2 (0 to 0.5)   | 0 (0 to 0)      | 1.6 (0.9 to 2.8) | 0 (0 to 0)      | 0.6 (0 to 2.3)    | 0 (0 to 0)     | 0.8 (0.2 to 1.4) | 0 (0 to 0)      | 3.6 (0.8 to 8.4)  | 0 (0 to 0)       | 0.2 (0.1 to 0.5)  | 0 (0 to 0)     | 0.6 (0.2 to 1.2) |
| North Macedonia          | Both   | 1020 (784 to 1300)  | 30.6 (23.6 to 39)   | 236 (158 to 332) | 7.2 (4.8 to 10)  | 41 (13 to 90) | 1.2 (0.4 to 2.7) | 103 (57 to 162) | 3.1 (1.7 to 4.9) | 112 (18 to 280) | 3.4 (0.5 to 8.5)  | 35 (7 to 59)   | 1.1 (0.2 to 1.8) | 160 (33 to 370) | 4.8 (1 to 11)     | 11 (4 to 23)     | 0.3 (0.1 to 0.7)  | 47 (7 to 98)   | 1.4 (0.2 to 2.8) |
|                          | Male   | 866 (656 to 1110)   | 54.1 (41.2 to 69.1) | 193 (130 to 272) | 12.2 (8.3 to 17) | 30 (9 to 68)  | 1.9 (0.6 to 4.3) | 81 (44 to 129)  | 5.1 (2.8 to 8)   | 91 (14 to 230)  | 5.7 (0.9 to 14.5) | 28 (6 to 48)   | 1.8 (0.4 to 3)   | 131 (23 to 315) | 8.3 (1.5 to 19.6) | 9 (3 to 20)      | 0.6 (0.2 to 1.3)  | 40 (6 to 84)   | 2.3 (0.3 to 4.9) |
|                          | Female | 154 (119 to 198)    | 9.1 (7 to 11.7)     | 43 (29 to 60)    | 2.6 (1.7 to 3.6) | 10 (4 to 22)  | 0.6 (0.2 to 1.3) | 22 (13 to 35)   | 1.3 (0.8 to 2.1) | 21 (3 to 53)    | 1.3 (0.2 to 3.2)  | 7 (2 to 12)    | 0.4 (0.1 to 0.7) | 28 (6 to 66)    | 1.6 (0.3 to 3.9)  | 2 (1 to 4)       | 0.1 (0.1 to 0.3)  | 7 (1 to 15)    | 0.4 (0 to 0.9)   |
| Northern Mariana Islands | Both   | 13 (11 to 15)       | 26.8 (23.2 to 30.4) | 1 (1 to 2)       | 2.4 (1.2 to 3.9) | 1 (0 to 1)    | 1.1 (0.3 to 2.7) | 1 (1 to 2)      | 2.5 (1.4 to 3.9) | 1 (0 to 3)      | 1.3 (0.1 to 5.4)  | 1 (0 to 1)     | 1.5 (0.4 to 2.4) | 3 (1 to 6)      | 6.4 (1.5 to 13.7) | 1 (0 to 1)       | 1.9 (1.2 to 3)    | 1 (1 to 2)     | 2 (0.9 to 3.3)   |
|                          | Male   | 11 (9 to 12)        | 47 (40.7 to 53.3)   | 1 (0 to 1)       | 3.7 (1.8 to 6.1) | 0 (0 to 1)    | 1.6 (0.4 to 3.9) | 1 (0 to 1)      | 3.6 (2 to 5.7)   | 0 (0 to 2)      | 2.1 (0.1 to 8.4)  | 1 (0 to 1)     | 2.4 (0.6 to 3.7) | 2 (0 to 5)      | 10.1 (1.9 to 22)  | 1 (0 to 1)       | 4 (2.4 to 6)      | 1 (0 to 2)     | 2.7 (1.2 to 4.7) |
|                          | Female | 2 (1 to 2)          | 7.3 (5.4 to 9.8)    | 0 (0 to 0)       | 1.1 (0.6 to 1.9) | 0 (0 to 0)    | 0.7 (0.2 to 1.6) | 0 (0 to 1)      | 1.4 (0.8 to 2.4) | 0 (0 to 1)      | 0.6 (0 to 2.6)    | 0 (0 to 0)     | 0.8 (0.2 to 1.3) | 1 (0 to 2)      | 2.9 (0.6 to 6.6)  | 0 (0 to 0)       | 0.1 (0.1 to 0.3)  | 0 (0 to 1)     | 1.1 (0.5 to 2)   |
| Norway                   | Both   | 1360 (1250 to 1470) | 14.1 (13 to 15.2)   | 67 (23 to 128)   | 0.7 (0.2 to 1.3) | 0 (0 to 1)    | 0 (0 to 0)       | 76 (45 to 118)  | 0.8 (0.5 to 1.3) | 152 (29 to 313) | 1.6 (0.3 to 3.2)  | 73 (18 to 111) | 0.8 (0.2 to 1.1) | 239 (57 to 518) | 2.4 (0.6 to 5.2)  | 586 (424 to 764) | 5.7 (4.1 to 7.4)  | 83 (16 to 156) | 0.9 (0.2 to 1.7) |
|                          | Male   | 815 (749 to 884)    | 17.8 (16.3 to 19.3) | 36 (12 to 69)    | 0.8 (0.3 to 1.5) | 0 (0 to 0)    | 0 (0 to 0)       | 45 (26 to 69)   | 1 (0.6 to 1.5)   | 83 (16 to 171)  | 1.8 (0.3 to 3.8)  | 39 (10 to 60)  | 0.9 (0.2 to 1.3) | 136 (22 to 312) | 2.9 (0.5 to 6.7)  | 465 (323 to 613) | 9.9 (6.9 to 13.1) | 55 (10 to 104) | 1.2 (0.2 to 2.3) |
|                          | Female | 547 (487 to 610)    | 11 (9.9 to 12.2)    | 32 (11 to 59)    | 0.6 (0.2 to 1.2) | 0 (0 to 0)    | 0 (0 to 0)       | 32 (18 to 48)   | 0.7 (0.4 to 1)   | 69 (13 to 143)  | 1.4 (0.3 to 2.8)  | 34 (9 to 53)   | 0.7 (0.2 to 1)   | 103 (20 to 242) | 1.9 (0.4 to 4.5)  | 121 (68 to 239)  | 2.2 (1.2 to 4.3)  | 27 (5 to 54)   | 0.6 (0.1 to 1.2) |



|           |        |                       |                     |                     |                  |                     |                  |                   |                  |                   |                  |                    |                  |                    |                   |                   |                  |                    |                  |
|-----------|--------|-----------------------|---------------------|---------------------|------------------|---------------------|------------------|-------------------|------------------|-------------------|------------------|--------------------|------------------|--------------------|-------------------|-------------------|------------------|--------------------|------------------|
| Oman      | Both   | 60 (46 to 82)         | 4.6 (3.7 to 5.8)    | 35 (23 to 52)       | 2.6 (1.8 to 3.5) | 0 (0 to 0)          | 0 (0 to 0)       | 8 (5 to 13)       | 0.6 (0.3 to 0.9) | 4 (0 to 16)       | 0.3 (0 to 1.1)   | 2 (1 to 4)         | 0.1 (0 to 0.2)   | 17 (4 to 39)       | 1.5 (0.3 to 3.2)  | 17 (9 to 27)      | 1.6 (0.9 to 2.4) | 9 (4 to 17)        | 0.4 (0.2 to 0.8) |
|           | Male   | 56 (42 to 79)         | 8.3 (6.5 to 10.5)   | 25 (16 to 39)       | 3.5 (2.4 to 4.9) | 0 (0 to 0)          | 0 (0 to 0)       | 5 (3 to 10)       | 0.8 (0.4 to 1.3) | 3 (0 to 12)       | 0.4 (0 to 1.5)   | 1 (0 to 3)         | 0.2 (0 to 0.3)   | 13 (2 to 30)       | 2.1 (0.4 to 4.7)  | 17 (9 to 26)      | 3.2 (1.9 to 4.8) | 8 (3 to 16)        | 0.7 (0.3 to 1.3) |
|           | Female | 4 (3 to 6)            | 0.7 (0.5 to 1)      | 10 (7 to 14)        | 1.6 (1.1 to 2.2) | 0 (0 to 0)          | 0 (0 to 0)       | 3 (1 to 4)        | 0.4 (0.2 to 0.6) | 1 (0 to 4)        | 0.2 (0 to 0.7)   | 1 (0 to 1)         | 0.1 (0 to 0.2)   | 4 (1 to 10)        | 0.8 (0.2 to 1.9)  | 0 (0 to 1)        | 0.1 (0 to 0.1)   | 1 (0 to 1)         | 0.1 (0 to 0.1)   |
| Pakistan  | Both   | 10700 (7920 to 14300) | 10.4 (7.8 to 13.8)  | 3280 (1950 to 4940) | 3 (1.8 to 4.5)   | 2620 (1440 to 4090) | 2.4 (1.3 to 3.8) | 824 (433 to 1340) | 0.8 (0.4 to 1.2) | 872 (132 to 2320) | 0.8 (0.1 to 2.2) | 1000 (340 to 1690) | 0.9 (0.3 to 1.5) | 1640 (328 to 4060) | 1.6 (0.3 to 4)    | 522 (232 to 1160) | 0.6 (0.3 to 1.3) | 1490 (649 to 2600) | 1.2 (0.5 to 2)   |
|           | Male   | 10200 (7440 to 13800) | 19.2 (14.1 to 25.6) | 2820 (1640 to 4330) | 5.1 (2.9 to 7.7) | 2120 (1110 to 3420) | 3.8 (2 to 6.1)   | 635 (325 to 1070) | 1.1 (0.6 to 1.9) | 733 (109 to 1960) | 1.3 (0.2 to 3.5) | 840 (278 to 1430)  | 1.5 (0.5 to 2.5) | 1380 (233 to 3570) | 2.6 (0.5 to 6.7)  | 463 (193 to 1110) | 1.1 (0.5 to 2.4) | 1420 (609 to 2510) | 2.1 (0.9 to 3.7) |
|           | Female | 551 (380 to 773)      | 1.1 (0.8 to 1.6)    | 462 (266 to 742)    | 0.9 (0.5 to 1.4) | 497 (286 to 750)    | 1 (0.5 to 1.4)   | 189 (96 to 317)   | 0.4 (0.2 to 0.6) | 140 (21 to 383)   | 0.3 (0 to 0.7)   | 163 (55 to 276)    | 0.3 (0.1 to 0.5) | 258 (50 to 637)    | 0.5 (0.1 to 1.4)  | 60 (23 to 134)    | 0.1 (0.1 to 0.3) | 65 (26 to 122)     | 0.1 (0 to 0.2)   |
| Palau     | Both   | 4 (3 to 5)            | 20.2 (16 to 25.6)   | 0 (0 to 1)          | 1.4 (0 to 3.9)   | 0 (0 to 0)          | 0 (0 to 0)       | 1 (0 to 1)        | 3.2 (1.8 to 5.2) | 0 (0 to 1)        | 1.4 (0.1 to 5.4) | 0 (0 to 1)         | 1.8 (0.4 to 3)   | 1 (0 to 3)         | 7.3 (1.8 to 15.5) | 0 (0 to 1)        | 1.7 (0.9 to 3.4) | 1 (0 to 1)         | 1.9 (0.9 to 3.2) |
|           | Male   | 3 (2 to 4)            | 29.9 (24.1 to 37.4) | 0 (0 to 0)          | 1.6 (0 to 4.1)   | 0 (0 to 0)          | 0 (0 to 0)       | 0 (0 to 0)        | 3.1 (1.6 to 4.9) | 0 (0 to 1)        | 1.5 (0.1 to 5.7) | 0 (0 to 0)         | 1.9 (0.5 to 3.2) | 1 (0 to 2)         | 7.8 (1.4 to 17.2) | 0 (0 to 1)        | 3.2 (1.4 to 6.4) | 0 (0 to 1)         | 2.3 (1 to 4.1)   |
|           | Female | 1 (1 to 2)            | 11.3 (8 to 15.6)    | 0 (0 to 0)          | 1.3 (0 to 3.6)   | 0 (0 to 0)          | 0 (0 to 0)       | 0 (0 to 1)        | 3.4 (1.8 to 5.5) | 0 (0 to 0)        | 1.3 (0.1 to 5)   | 0 (0 to 0)         | 1.7 (0.4 to 2.9) | 1 (0 to 2)         | 6.8 (1.5 to 15.3) | 0 (0 to 0)        | 0.5 (0.2 to 1)   | 0 (0 to 0)         | 1.5 (0.6 to 2.7) |
| Palestine | Both   | 346 (290 to 405)      | 16 (13.5 to 18.7)   | 105 (72 to 143)     | 4.8 (3.3 to 6.4) | 1 (1 to 3)          | 0.1 (0 to 0.1)   | 39 (24 to 59)     | 1.7 (1 to 2.6)   | 26 (3 to 73)      | 1.2 (0.1 to 3.3) | 20 (5 to 32)       | 0.9 (0.2 to 1.4) | 72 (16 to 156)     | 3.6 (0.8 to 7.6)  | 4 (2 to 7)        | 0.2 (0.1 to 0.4) | 29 (13 to 49)      | 1.1 (0.5 to 1.8) |
|           | Male   | 329 (276 to 385)      | 33.1 (28.1 to 38.1) | 84 (57 to 114)      | 8.3 (5.6 to 11)  | 1 (0 to 2)          | 0.1 (0 to 0.2)   | 27 (16 to 41)     | 2.6 (1.5 to 3.7) | 20 (2 to 58)      | 2 (0.2 to 5.7)   | 16 (4 to 26)       | 1.6 (0.4 to 2.8) | 59 (10 to 130)     | 6.4 (1.2 to 14)   | 3 (2 to 6)        | 0.5 (0.2 to 0.8) | 28 (13 to 48)      | 2.1 (0.9 to 3.3) |

|                  |        |                  |                     |                |                  |                  |                    |                |                  |               |                  |               |                  |                 |                   |                |                  |                |                  |
|------------------|--------|------------------|---------------------|----------------|------------------|------------------|--------------------|----------------|------------------|---------------|------------------|---------------|------------------|-----------------|-------------------|----------------|------------------|----------------|------------------|
|                  |        |                  | to<br>38.8)         |                | to<br>11.2)      |                  |                    |                | to<br>3.9)       |               |                  |               | to<br>2.5)       |                 |                   |                | to<br>0.8)       |                | to<br>3.5)       |
|                  | Female | 17 (12 to 23)    | 1.6 (1.1 to 2.2)    | 22 (15 to 30)  | 1.8 (1.2 to 2.5) | 0 (0 to 1)       | 0 (0 to 0.1)       | 12 (7 to 18)   | 1 (0.6 to 1.5)   | 5 (1 to 15)   | 0.5 (0.1 to 1.3) | 4 (1 to 7)    | 0.4 (0.1 to 0.6) | 13 (3 to 30)    | 1.2 (0.3 to 2.8)  | 0 (0 to 1)     | 0 (0 to 0.1)     | 1 (0 to 2)     | 0.1 (0 to 0.1)   |
| Panama           | Both   | 182 (140 to 235) | 4.4 (3.4 to 5.7)    | 40 (22 to 62)  | 1 (0.5 to 1.5)   | 9 (3 to 18)      | 0.2 (0.1 to 0.4)   | 12 (6 to 20)   | 0.3 (0.2 to 0.5) | 20 (2 to 74)  | 0.5 (0 to 1.8)   | 19 (5 to 30)  | 0.4 (0.1 to 0.7) | 57 (13 to 126)  | 1.4 (0.3 to 3.1)  | 13 (6 to 22)   | 0.3 (0.1 to 0.5) | 26 (13 to 45)  | 0.6 (0.3 to 1.1) |
|                  | Male   | 148 (112 to 191) | 7.5 (5.7 to 9.7)    | 26 (14 to 41)  | 1.3 (0.7 to 2.1) | 5 (2 to 10)      | 0.3 (0.1 to 0.5)   | 8 (4 to 14)    | 0.4 (0.2 to 0.7) | 13 (1 to 48)  | 0.6 (0.1 to 2.4) | 12 (3 to 19)  | 0.6 (0.2 to 1)   | 38 (7 to 89)    | 1.9 (0.3 to 4.5)  | 11 (5 to 20)   | 0.6 (0.3 to 1.1) | 21 (9 to 37)   | 1 (0.4 to 1.8)   |
|                  | Female | 35 (25 to 46)    | 1.6 (1.2 to 2.1)    | 14 (8 to 22)   | 0.6 (0.4 to 1)   | 4 (2 to 8)       | 0.2 (0.1 to 0.4)   | 4 (2 to 6)     | 0.2 (0.1 to 0.3) | 7 (1 to 28)   | 0.3 (0 to 1.3)   | 7 (2 to 11)   | 0.3 (0.1 to 0.5) | 19 (4 to 45)    | 0.9 (0.2 to 2.1)  | 2 (1 to 3)     | 0.1 (0 to 0.1)   | 6 (2 to 10)    | 0.3 (0.1 to 0.5) |
| Papua New Guinea | Both   | 495 (339 to 765) | 11.9 (8.2 to 17.9)  | 34 (7 to 93)   | 0.8 (0.2 to 2.2) | 284 (174 to 457) | 6.6 (4.2 to 10.6)  | 54 (25 to 101) | 1.2 (0.6 to 2.3) | 33 (2 to 126) | 0.8 (0 to 2.9)   | 49 (15 to 91) | 1.1 (0.3 to 2.1) | 121 (24 to 294) | 3 (0.6 to 7)      | 53 (24 to 105) | 1.5 (0.7 to 2.8) | 36 (15 to 70)  | 0.6 (0.3 to 1.2) |
|                  | Male   | 429 (286 to 677) | 19.5 (13.4 to 30)   | 29 (6 to 79)   | 1.3 (0.3 to 3.6) | 226 (136 to 371) | 10.2 (6.2 to 16.6) | 40 (19 to 76)  | 1.8 (0.8 to 3.5) | 27 (2 to 105) | 1.2 (0.1 to 4.6) | 39 (12 to 75) | 1.8 (0.5 to 3.3) | 101 (17 to 255) | 4.7 (0.8 to 11.6) | 51 (23 to 101) | 2.8 (1.4 to 5.3) | 27 (10 to 54)  | 0.9 (0.3 to 1.7) |
|                  | Female | 67 (39 to 107)   | 3.5 (2 to 5.5)      | 5 (1 to 13)    | 0.2 (0 to 0.6)   | 57 (32 to 97)    | 2.8 (1.5 to 4.8)   | 13 (6 to 26)   | 0.6 (0.3 to 1.2) | 6 (0 to 24)   | 0.3 (0 to 1.2)   | 9 (3 to 19)   | 0.5 (0.1 to 0.9) | 20 (3 to 55)    | 1 (0.2 to 2.8)    | 2 (1 to 4)     | 0.1 (0 to 0.2)   | 9 (3 to 19)    | 0.3 (0.1 to 0.7) |
| Paraguay         | Both   | 568 (435 to 735) | 10.7 (8.3 to 13.8)  | 67 (37 to 105) | 1.2 (0.7 to 1.9) | 70 (32 to 120)   | 1.3 (0.6 to 2.2)   | 40 (22 to 68)  | 0.7 (0.4 to 1.3) | 28 (3 to 90)  | 0.5 (0.1 to 1.7) | 25 (6 to 41)  | 0.5 (0.1 to 0.8) | 81 (16 to 189)  | 1.6 (0.3 to 3.6)  | 41 (20 to 72)  | 0.8 (0.4 to 1.4) | 63 (29 to 110) | 1.1 (0.5 to 1.9) |
|                  | Male   | 481 (366 to 626) | 19.3 (14.9 to 24.9) | 52 (28 to 83)  | 2.1 (1.1 to 3.3) | 49 (21 to 88)    | 1.9 (0.8 to 3.5)   | 29 (16 to 50)  | 1.1 (0.6 to 1.9) | 21 (3 to 68)  | 0.8 (0.1 to 2.7) | 19 (4 to 31)  | 0.7 (0.2 to 1.2) | 63 (10 to 152)  | 2.6 (0.4 to 6.2)  | 35 (16 to 63)  | 1.5 (0.7 to 2.7) | 53 (23 to 95)  | 1.9 (0.8 to 3.3) |
|                  | Female | 87 (64 to 114)   | 3.1 (2.3 to 4.1)    | 15 (8 to 23)   | 0.5 (0.3 to 0.8) | 21 (10 to 34)    | 0.7 (0.4 to 1.2)   | 11 (6 to 19)   | 0.4 (0.2 to 0.6) | 7 (1 to 21)   | 0.2 (0 to 0.7)   | 6 (1 to 10)   | 0.2 (0 to 0.4)   | 18 (4 to 46)    | 0.7 (0.1 to 1.6)  | 6 (3 to 11)    | 0.2 (0.1 to 0.4) | 10 (4 to 17)   | 0.3 (0.1 to 0.6) |

|             |        |                           |                        |                        |                       |                       |                     |                       |                     |                       |                     |                       |                     |                       |                      |                        |                       |                       |                     |
|-------------|--------|---------------------------|------------------------|------------------------|-----------------------|-----------------------|---------------------|-----------------------|---------------------|-----------------------|---------------------|-----------------------|---------------------|-----------------------|----------------------|------------------------|-----------------------|-----------------------|---------------------|
| Peru        | Both   | 639<br>(451 to 874)       | 2 (1.4 to 2.8)         | 597<br>(363 to 881)    | 1.9<br>(1.1 to 2.8)   | 161<br>(72 to 286)    | 0.5<br>(0.2 to 0.9) | 57 (25 to 106)        | 0.2<br>(0.1 to 0.3) | 127 (9 to 436)        | 0.4 (0 to 1.4)      | 130<br>(32 to 217)    | 0.4<br>(0.1 to 0.7) | 243<br>(55 to 570)    | 0.8<br>(0.2 to 1.8)  | 162<br>(75 to 305)     | 0.5<br>(0.2 to 1)     | 239<br>(113 to 411)   | 0.7<br>(0.3 to 1.3) |
|             | Male   | 521<br>(362 to 728)       | 3.5<br>(2.4 to 4.8)    | 326<br>(198 to 484)    | 2.1<br>(1.3 to 3.2)   | 71 (28 to 132)        | 0.5<br>(0.2 to 0.9) | 31 (13 to 58)         | 0.2<br>(0.1 to 0.4) | 67 (5 to 240)         | 0.4 (0 to 1.6)      | 68 (17 to 113)        | 0.4<br>(0.1 to 0.7) | 131<br>(21 to 333)    | 0.9<br>(0.1 to 2.2)  | 111<br>(45 to 230)     | 0.7<br>(0.3 to 1.5)   | 150<br>(64 to 272)    | 0.9<br>(0.4 to 1.7) |
|             | Female | 119<br>(78 to 171)        | 0.7<br>(0.5 to 1)      | 271<br>(162 to 409)    | 1.6 (1 to 2.5)        | 90 (43 to 160)        | 0.5<br>(0.3 to 1)   | 26 (12 to 48)         | 0.2<br>(0.1 to 0.3) | 60 (4 to 209)         | 0.4 (0 to 1.3)      | 62 (15 to 103)        | 0.4<br>(0.1 to 0.6) | 112<br>(21 to 277)    | 0.7<br>(0.1 to 1.7)  | 51 (22 to 105)         | 0.3<br>(0.1 to 0.6)   | 89 (38 to 161)        | 0.5<br>(0.2 to 1)   |
| Philippines | Both   | 8650<br>(6810 to 10800)   | 11.7<br>(9.3 to 14.5)  | 1490<br>(986 to 2170)  | 2 (1.3 to 2.9)        | 1610<br>(903 to 2580) | 2.1<br>(1.2 to 3.4) | 877<br>(474 to 1380)  | 1.2<br>(0.6 to 1.8) | 295<br>(56 to 633)    | 0.4<br>(0.1 to 0.8) | 460<br>(122 to 741)   | 0.6<br>(0.2 to 1)   | 984<br>(213 to 2260)  | 1.4<br>(0.3 to 3.2)  | 259<br>(143 to 450)    | 0.4<br>(0.2 to 0.7)   | 983<br>(476 to 1600)  | 1.1<br>(0.5 to 1.8) |
|             | Male   | 7240<br>(5470 to 9310)    | 21.5<br>(16.4 to 27.6) | 1050<br>(650 to 1580)  | 3.1<br>(1.9 to 4.5)   | 1030<br>(555 to 1750) | 3 (1.6 to 5.1)      | 531<br>(283 to 857)   | 1.6<br>(0.9 to 2.6) | 202<br>(37 to 442)    | 0.6<br>(0.1 to 1.3) | 308<br>(74 to 518)    | 0.9<br>(0.2 to 1.5) | 638<br>(99 to 1640)   | 2.1<br>(0.3 to 5.2)  | 235<br>(118 to 422)    | 0.8<br>(0.4 to 1.5)   | 777<br>(348 to 1320)  | 1.8<br>(0.8 to 3.1) |
|             | Female | 1410<br>(1080 to 1820)    | 3.8 (3 to 4.9)         | 437<br>(276 to 635)    | 1.1<br>(0.7 to 1.6)   | 576<br>(325 to 886)   | 1.4<br>(0.8 to 2.2) | 346<br>(181 to 566)   | 0.8<br>(0.4 to 1.4) | 93 (16 to 200)        | 0.2 (0 to 0.5)      | 153<br>(40 to 256)    | 0.4<br>(0.1 to 0.6) | 347<br>(68 to 846)    | 0.9<br>(0.2 to 2.2)  | 24 (13 to 40)          | 0.1 (0 to 0.1)        | 206<br>(93 to 353)    | 0.4<br>(0.2 to 0.8) |
| Poland      | Both   | 23200<br>(19400 to 27700) | 32.7<br>(27.2 to 39.1) | 4750<br>(3360 to 6450) | 6.7<br>(4.8 to 9.2)   | 466<br>(130 to 1130)  | 0.7<br>(0.2 to 1.6) | 1450<br>(817 to 2250) | 2.1<br>(1.2 to 3.3) | 1180<br>(196 to 2480) | 1.7<br>(0.3 to 3.5) | 1390<br>(388 to 2210) | 2 (0.6 to 3.1)      | 3180<br>(684 to 6990) | 4.4<br>(0.9 to 9.7)  | 3600<br>(2170 to 5460) | 4.9 (3 to 7.4)        | 1290<br>(229 to 2530) | 1.9<br>(0.3 to 3.6) |
|             | Male   | 17100<br>(13400 to 21200) | 56.7<br>(44.7 to 70.3) | 3330<br>(2310 to 4680) | 11.2<br>(7.7 to 15.7) | 284<br>(76 to 699)    | 1 (0.3 to 2.3)      | 936<br>(514 to 1510)  | 3.1<br>(1.7 to 5.1) | 825<br>(133 to 1730)  | 2.8<br>(0.4 to 5.8) | 962<br>(272 to 1560)  | 3.2<br>(0.9 to 5.2) | 2330<br>(408 to 5380) | 7.7<br>(1.4 to 17.9) | 3290<br>(1890 to 5170) | 10.9<br>(6.3 to 17.1) | 1000<br>(174 to 1970) | 3.1<br>(0.5 to 6.2) |
|             | Female | 6140<br>(4810 to 7730)    | 15.4<br>(12 to 19.5)   | 1420<br>(982 to 1950)  | 3.5<br>(2.4 to 4.9)   | 182<br>(51 to 438)    | 0.5<br>(0.1 to 1.1) | 509<br>(286 to 798)   | 1.3<br>(0.7 to 2.1) | 357<br>(57 to 777)    | 0.9<br>(0.1 to 1.9) | 430<br>(125 to 701)   | 1.1<br>(0.3 to 1.8) | 854<br>(157 to 2030)  | 2 (0.4 to 4.8)       | 310<br>(143 to 498)    | 0.7<br>(0.3 to 1.2)   | 285<br>(37 to 590)    | 0.8<br>(0.1 to 1.6) |
| Portugal    | Both   | 2920<br>(2690 to 3130)    | 13.1<br>(12.1 to 14.1) | 219<br>(115 to 350)    | 1 (0.5 to 1.5)        | 3 (1 to 8)            | 0 (0 to 0)          | 182<br>(105 to 278)   | 0.9<br>(0.5 to 1.3) | 296<br>(51 to 721)    | 1.3<br>(0.2 to 3.2) | 140<br>(33 to 214)    | 0.6<br>(0.1 to 0.9) | 572<br>(128 to 1230)  | 2.4<br>(0.5 to 5.1)  | 521<br>(309 to 771)    | 2 (1.2 to 3)          | 207<br>(36 to 401)    | 1 (0.2 to 2)        |
|             | Male   | 2540<br>(2340)            | 25.3<br>(23.3)         | 166<br>(87 to 265)     | 1.7<br>(0.9)          | 2 (0 to 6)            | 0 (0 to 0.1)        | 128<br>(74 to 199)    | 1.3<br>(0.8)        | 224<br>(39 to 546)    | 2.2<br>(0.4)        | 104<br>(21 to 161)    | 1 (0.2 to 1.6)      | 437<br>(76 to 987)    | 4.2<br>(0.7)         | 497<br>(286)           | 4.5<br>(2.6)          | 174<br>(30 to 337)    | 1.8<br>(0.3)        |

|             |        |                                 |                              |                              |                           |               |               |                            |                           |                             |                           |                            |                           |                             |                            |                             |                           |                            |                           |
|-------------|--------|---------------------------------|------------------------------|------------------------------|---------------------------|---------------|---------------|----------------------------|---------------------------|-----------------------------|---------------------------|----------------------------|---------------------------|-----------------------------|----------------------------|-----------------------------|---------------------------|----------------------------|---------------------------|
|             |        | to<br>2740)                     | to<br>27.2)                  |                              | to<br>2.6)                |               |               |                            | to<br>2.1)                |                             | to<br>5.4)                |                            |                           |                             | to<br>9.4)                 | to<br>740)                  | to<br>6.7)                |                            | to<br>3.6)                |
|             | Female | 377<br>(323 to<br>430)          | 3.3<br>(2.8<br>to<br>3.7)    | 53 (28<br>to 86)             | 0.4<br>(0.2<br>to<br>0.7) | 1 (0 to<br>3) | 0 (0<br>to 0) | 54 (31<br>to 82)           | 0.5<br>(0.3<br>to<br>0.7) | 72 (12<br>to<br>175)        | 0.6<br>(0.1<br>to<br>1.3) | 36 (9<br>to 56)            | 0.3<br>(0.1<br>to<br>0.4) | 136<br>(28 to<br>307)       | 0.9<br>(0.2<br>to<br>2.1)  | 24 (13<br>to 39)            | 0.2<br>(0.1<br>to<br>0.2) | 33 (4<br>to 68)            | 0.3 (0<br>to<br>0.6)      |
| Puerto Rico | Both   | 413<br>(311 to<br>528)          | 5.6<br>(4.2<br>to<br>7.2)    | 27 (5<br>to 53)              | 0.4<br>(0.1<br>to<br>0.7) | 0 (0 to<br>0) | 0 (0<br>to 0) | 25 (13<br>to 42)           | 0.4<br>(0.2<br>to<br>0.6) | 23 (2<br>to 89)             | 0.3 (0<br>to<br>1.2)      | 25 (6<br>to 41)            | 0.3<br>(0.1<br>to<br>0.6) | 130<br>(32 to<br>284)       | 1.7<br>(0.4<br>to<br>3.8)  | 56 (28<br>to 94)            | 0.7<br>(0.3<br>to<br>1.2) | 15 (2<br>to 32)            | 0.2 (0<br>to<br>0.5)      |
|             | Male   | 296<br>(223 to<br>381)          | 9.1<br>(6.9<br>to<br>11.8)   | 16 (3<br>to 32)              | 0.5<br>(0.1<br>to 1)      | 0 (0 to<br>0) | 0 (0<br>to 0) | 16 (8<br>to 27)            | 0.5<br>(0.3<br>to<br>0.9) | 14 (1<br>to 54)             | 0.4 (0<br>to<br>1.7)      | 14 (3<br>to 24)            | 0.4<br>(0.1<br>to<br>0.8) | 81 (15<br>to<br>182)        | 2.4<br>(0.5<br>to<br>5.5)  | 53 (27<br>to 90)            | 1.5<br>(0.8<br>to<br>2.6) | 11 (2<br>to 23)            | 0.4<br>(0.1<br>to<br>0.8) |
|             | Female | 118<br>(85 to<br>154)           | 2.8 (2<br>to<br>3.6)         | 11 (2<br>to 21)              | 0.3<br>(0.1<br>to<br>0.5) | 0 (0 to<br>0) | 0 (0<br>to 0) | 9 (5 to<br>15)             | 0.2<br>(0.1<br>to<br>0.4) | 9 (1 to<br>36)              | 0.2 (0<br>to<br>0.9)      | 11 (2<br>to 18)            | 0.3<br>(0.1<br>to<br>0.4) | 49 (11<br>to<br>114)        | 1.1<br>(0.2<br>to<br>2.6)  | 3 (1 to<br>6)               | 0.1 (0<br>to<br>0.1)      | 5 (1 to<br>10)             | 0.1 (0<br>to<br>0.3)      |
| Qatar       | Both   | 67 (46<br>to 97)                | 12.5<br>(9.4<br>to<br>16.2)  | 36 (23<br>to 53)             | 6.4<br>(4.4<br>to<br>8.8) | 0 (0 to<br>0) | 0 (0<br>to 0) | 9 (5 to<br>14)             | 1.4<br>(0.8<br>to<br>2.2) | 3 (0 to<br>11)              | 0.6<br>(0.1<br>to 2)      | 1 (0 to<br>2)              | 0.2<br>(0.1<br>to<br>0.3) | 24 (6<br>to 52)             | 5.1<br>(1.2<br>to<br>10.2) | 2 (1 to<br>4)               | 0.6<br>(0.3<br>to<br>1.3) | 16 (7<br>to 30)            | 1.3<br>(0.5<br>to<br>2.4) |
|             | Male   | 66 (45<br>to 95)                | 16.4<br>(12.3<br>to<br>21.3) | 31 (19<br>to 46)             | 7.3 (5<br>to<br>10.3)     | 0 (0 to<br>0) | 0 (0<br>to 0) | 7 (4 to<br>12)             | 1.6<br>(0.9<br>to<br>2.5) | 3 (0 to<br>9)               | 0.7<br>(0.1<br>to<br>2.3) | 1 (0 to<br>2)              | 0.2<br>(0.1<br>to<br>0.4) | 21 (4<br>to 46)             | 5.8<br>(1.3<br>to<br>12.1) | 2 (1 to<br>4)               | 0.8<br>(0.3<br>to<br>1.6) | 15 (6<br>to 29)            | 1.6<br>(0.7<br>to<br>3.1) |
|             | Female | 1 (1 to<br>2)                   | 0.9<br>(0.6<br>to<br>1.4)    | 6 (4 to<br>8)                | 3.6<br>(2.5<br>to<br>4.9) | 0 (0 to<br>0) | 0 (0<br>to 0) | 2 (1 to<br>3)              | 0.9<br>(0.5<br>to<br>1.4) | 1 (0 to<br>2)               | 0.3 (0<br>to<br>1.1)      | 0 (0 to<br>0)              | 0.1 (0<br>to<br>0.2)      | 3 (1 to<br>7)               | 2.8<br>(0.7<br>to<br>5.9)  | 0 (0 to<br>0)               | 0.2<br>(0.1<br>to<br>0.4) | 1 (0 to<br>1)              | 0.2<br>(0.1<br>to<br>0.3) |
| South Korea | Both   | 15700<br>(13900<br>to<br>17500) | 17.7<br>(15.6<br>to<br>19.7) | 4330<br>(3090<br>to<br>5710) | 4.9<br>(3.5<br>to<br>6.5) | 3 (1 to<br>8) | 0 (0<br>to 0) | 778<br>(456<br>to<br>1180) | 0.9<br>(0.5<br>to<br>1.3) | 1260<br>(161<br>to<br>3360) | 1.4<br>(0.2<br>to<br>3.8) | 892<br>(219<br>to<br>1370) | 1 (0.2<br>to<br>1.6)      | 2230<br>(488<br>to<br>4890) | 2.5<br>(0.5<br>to<br>5.5)  | 1530<br>(892<br>to<br>2300) | 1.8 (1<br>to<br>2.6)      | 929<br>(158<br>to<br>1810) | 1 (0.2<br>to<br>1.9)      |
|             | Male   | 13500<br>(12000<br>to<br>15000) | 36.4<br>(31.8<br>to<br>40.6) | 3090<br>(2200<br>to<br>4060) | 8.3<br>(5.9<br>to 11)     | 2 (0 to<br>5) | 0 (0<br>to 0) | 464<br>(261<br>to<br>725)  | 1.2<br>(0.7<br>to<br>1.9) | 900<br>(117<br>to<br>2360)  | 2.4<br>(0.3<br>to<br>6.4) | 633<br>(156<br>to<br>986)  | 1.7<br>(0.4<br>to<br>2.7) | 1680<br>(268<br>to<br>3860) | 4.5<br>(0.7<br>to<br>10.5) | 1400<br>(776<br>to<br>2140) | 4.4<br>(2.4<br>to<br>6.7) | 771<br>(125<br>to<br>1520) | 1.7<br>(0.3<br>to<br>3.4) |
|             | Female | 2210<br>(1740<br>to<br>2690)    | 4.3<br>(3.4<br>to<br>5.2)    | 1240<br>(877<br>to<br>1680)  | 2.4<br>(1.7<br>to<br>3.3) | 1 (0 to<br>3) | 0 (0<br>to 0) | 315<br>(185<br>to<br>479)  | 0.6<br>(0.4<br>to 1)      | 362<br>(45 to<br>961)       | 0.7<br>(0.1<br>to<br>1.9) | 259<br>(66 to<br>405)      | 0.5<br>(0.1<br>to<br>0.8) | 554<br>(105<br>to<br>1320)  | 1.1<br>(0.2<br>to<br>2.5)  | 133<br>(64 to<br>214)       | 0.3<br>(0.1<br>to<br>0.4) | 158<br>(23 to<br>324)      | 0.3 (0<br>to<br>0.6)      |

|         |        |                           |                        |                        |                     |                    |                     |                        |                     |                       |                     |                       |                     |                       |                     |                        |                     |                       |                     |
|---------|--------|---------------------------|------------------------|------------------------|---------------------|--------------------|---------------------|------------------------|---------------------|-----------------------|---------------------|-----------------------|---------------------|-----------------------|---------------------|------------------------|---------------------|-----------------------|---------------------|
| Moldova | Both   | 716<br>(614 to 830)       | 12.1<br>(10.4 to 14)   | 98 (51 to 153)         | 1.7<br>(0.9 to 2.6) | 12 (4 to 25)       | 0.2<br>(0.1 to 0.4) | 45 (27 to 68)          | 0.8<br>(0.5 to 1.2) | 60 (4 to 187)         | 1 (0.1 to 3.2)      | 48 (14 to 75)         | 0.8<br>(0.2 to 1.3) | 71 (14 to 164)        | 1.2<br>(0.2 to 2.8) | 18 (10 to 29)          | 0.3<br>(0.2 to 0.5) | 22 (4 to 42)          | 0.4<br>(0.1 to 0.7) |
|         | Male   | 667<br>(569 to 773)       | 27 (23 to 31.1)        | 77 (41 to 122)         | 3.1<br>(1.6 to 4.9) | 8 (3 to 19)        | 0.3<br>(0.1 to 0.8) | 29 (18 to 45)          | 1.2<br>(0.7 to 1.8) | 47 (4 to 147)         | 1.9<br>(0.1 to 6)   | 38 (11 to 59)         | 1.5<br>(0.4 to 2.4) | 56 (9 to 134)         | 2.3<br>(0.4 to 5.4) | 16 (8 to 26)           | 0.6<br>(0.3 to 1)   | 17 (3 to 34)          | 0.7<br>(0.1 to 1.3) |
|         | Female | 48 (35 to 64)             | 1.4 (1 to 1.9)         | 21 (11 to 33)          | 0.6<br>(0.3 to 1)   | 3 (1 to 7)         | 0.1 (0 to 0.2)      | 16 (9 to 24)           | 0.5<br>(0.3 to 0.7) | 13 (1 to 41)          | 0.4 (0 to 1.2)      | 11 (3 to 17)          | 0.3<br>(0.1 to 0.5) | 15 (3 to 36)          | 0.4<br>(0.1 to 1)   | 2 (1 to 4)             | 0.1 (0 to 0.1)      | 4 (1 to 9)            | 0.1 (0 to 0.3)      |
| Romania | Both   | 7770<br>(6400 to 9530)    | 21.9<br>(18 to 27)     | 1210<br>(814 to 1680)  | 3.4<br>(2.3 to 4.8) | 182<br>(53 to 452) | 0.5<br>(0.1 to 1.3) | 611<br>(344 to 965)    | 1.7 (1 to 2.8)      | 491<br>(74 to 1360)   | 1.4<br>(0.2 to 3.9) | 405<br>(93 to 663)    | 1.1<br>(0.3 to 1.9) | 805<br>(166 to 1870)  | 2.2<br>(0.4 to 5)   | 465<br>(255 to 755)    | 1.2<br>(0.7 to 2)   | 502<br>(78 to 1010)   | 1.5<br>(0.2 to 3)   |
|         | Male   | 6560<br>(5380 to 8050)    | 41.5<br>(34.1 to 50.9) | 933<br>(625 to 1300)   | 5.9 (4 to 8.3)      | 125<br>(35 to 329) | 0.8<br>(0.2 to 2.1) | 446<br>(247 to 714)    | 2.8<br>(1.6 to 4.6) | 376<br>(56 to 1040)   | 2.4<br>(0.4 to 6.6) | 308<br>(69 to 509)    | 2 (0.4 to 3.3)      | 639<br>(101 to 1520)  | 4 (0.6 to 9.5)      | 399<br>(199 to 678)    | 2.5<br>(1.2 to 4.2) | 410<br>(64 to 822)    | 2.6<br>(0.4 to 5.2) |
|         | Female | 1210<br>(974 to 1500)     | 6.1<br>(4.9 to 7.6)    | 279<br>(186 to 386)    | 1.4<br>(0.9 to 1.9) | 57 (18 to 134)     | 0.3<br>(0.1 to 0.7) | 165<br>(92 to 261)     | 0.8<br>(0.5 to 1.3) | 115<br>(18 to 320)    | 0.6<br>(0.1 to 1.6) | 97 (23 to 156)        | 0.5<br>(0.1 to 0.8) | 166<br>(31 to 408)    | 0.8<br>(0.1 to 1.9) | 66 (36 to 117)         | 0.3<br>(0.2 to 0.5) | 92 (12 to 193)        | 0.5<br>(0.1 to 1.1) |
| Russia  | Both   | 38900<br>(32500 to 46200) | 16.3<br>(13.6 to 19.3) | 4140<br>(2160 to 6530) | 1.7<br>(0.9 to 2.7) | 126<br>(31 to 327) | 0.1 (0 to 0.1)      | 2440<br>(1400 to 3750) | 1 (0.6 to 1.6)      | 3810<br>(740 to 7570) | 1.6<br>(0.3 to 3.2) | 2410<br>(680 to 3780) | 1 (0.3 to 1.6)      | 2730<br>(546 to 6400) | 1.1<br>(0.2 to 2.6) | 3440<br>(2010 to 5110) | 1.4<br>(0.8 to 2.1) | 1670<br>(297 to 3230) | 0.7<br>(0.1 to 1.3) |
|         | Male   | 35500<br>(29200 to 42600) | 39.1<br>(32.5 to 46.8) | 3280<br>(1660 to 5250) | 3.6<br>(1.9 to 5.8) | 91 (21 to 243)     | 0.1 (0 to 0.3)      | 1590<br>(878 to 2500)  | 1.7 (1 to 2.7)      | 3010<br>(572 to 6060) | 3.3<br>(0.6 to 6.7) | 1900<br>(540 to 3050) | 2.1<br>(0.6 to 3.4) | 2150<br>(349 to 5240) | 2.4<br>(0.4 to 5.9) | 3030<br>(1610 to 4690) | 3.5<br>(1.9 to 5.5) | 1360<br>(232 to 2640) | 1.3<br>(0.2 to 2.6) |
|         | Female | 3420<br>(2730 to 4230)    | 2.4<br>(1.9 to 3)      | 864<br>(458 to 1340)   | 0.6<br>(0.3 to 0.9) | 34 (9 to 93)       | 0 (0 to 0.1)        | 855<br>(507 to 1320)   | 0.6<br>(0.4 to 0.9) | 801<br>(159 to 1580)  | 0.5<br>(0.1 to 1.1) | 515<br>(146 to 815)   | 0.4<br>(0.1 to 0.6) | 587<br>(105 to 1430)  | 0.4<br>(0.1 to 0.9) | 417<br>(230 to 656)    | 0.3<br>(0.1 to 0.4) | 319<br>(50 to 647)    | 0.2 (0 to 0.5)      |
| Rwanda  | Both   | 248<br>(162 to 370)       | 4.8<br>(3.2 to 7.1)    | 36 (14 to 73)          | 0.6<br>(0.2 to 1.3) | 134<br>(79 to 216) | 2.4<br>(1.4 to 3.9) | 11 (5 to 21)           | 0.2<br>(0.1 to 0.3) | 21 (1 to 79)          | 0.4 (0 to 1.4)      | 1 (1 to 2)            | 0 (0 to 0)          | 27 (5 to 70)          | 0.5<br>(0.1 to 1.4) | 24 (8 to 91)           | 0.5<br>(0.2 to 1.9) | 28 (11 to 55)         | 0.4<br>(0.2 to 0.8) |
|         | Male   | 192<br>(117 to 302)       | 9.3<br>(5.8 to 13.6)   | 26 (9 to 57)           | 1.2<br>(0.4 to 2.0) | 85 (45 to 151)     | 3.9 (2 to 6.8)      | 7 (3 to 14)            | 0.3<br>(0.1 to 0.5) | 14 (1 to 56)          | 0.6 (0 to 2.5)      | 1 (0 to 1)            | 0 (0 to 0)          | 20 (3 to 56)          | 1 (0.2 to 2.8)      | 17 (4 to 83)           | 1 (0.3 to 4.5)      | 19 (7 to 41)          | 0.6<br>(0.2 to 1.0) |

|                                  |        |               |                    |              |                  |               |                |            |                  |             |                |            |                  |             |                  |             |                  |             |                  |
|----------------------------------|--------|---------------|--------------------|--------------|------------------|---------------|----------------|------------|------------------|-------------|----------------|------------|------------------|-------------|------------------|-------------|------------------|-------------|------------------|
|                                  |        |               | to<br>14.3)        |              | to<br>2.5)       |               |                |            | to<br>0.6)       |             |                |            |                  |             |                  |             |                  |             | to<br>1.4)       |
|                                  | Female | 56 (40 to 75) | 1.9 (1.4 to 2.6)   | 10 (4 to 19) | 0.3 (0.1 to 0.6) | 49 (32 to 70) | 1.5 (1 to 2.1) | 4 (2 to 7) | 0.1 (0.1 to 0.2) | 7 (0 to 27) | 0.2 (0 to 0.8) | 0 (0 to 1) | 0 (0 to 0)       | 8 (1 to 19) | 0.3 (0 to 0.6)   | 7 (2 to 14) | 0.2 (0.1 to 0.5) | 9 (3 to 16) | 0.2 (0.1 to 0.4) |
| Saint Kitts and Nevis            | Both   | 3 (2 to 3)    | 4.3 (3.6 to 5.1)   | 0 (0 to 1)   | 0.6 (0.3 to 1)   | 0 (0 to 0)    | 0 (0 to 0.1)   | 0 (0 to 0) | 0.4 (0.2 to 0.6) | 0 (0 to 1)  | 0.3 (0 to 1.2) | 0 (0 to 1) | 0.6 (0.2 to 1)   | 1 (0 to 2)  | 1.5 (0.4 to 3.2) | 1 (1 to 2)  | 1.8 (1.2 to 2.5) | 1 (0 to 1)  | 0.7 (0.3 to 1.1) |
|                                  | Male   | 2 (2 to 3)    | 7.4 (6.3 to 8.7)   | 0 (0 to 0)   | 0.8 (0.3 to 1.4) | 0 (0 to 0)    | 0.1 (0 to 0.1) | 0 (0 to 0) | 0.5 (0.3 to 0.9) | 0 (0 to 1)  | 0.4 (0 to 1.6) | 0 (0 to 0) | 0.8 (0.3 to 1.3) | 1 (0 to 1)  | 2.2 (0.4 to 4.8) | 1 (1 to 1)  | 3.9 (2.5 to 5.5) | 0 (0 to 1)  | 1.1 (0.5 to 1.8) |
|                                  | Female | 0 (0 to 1)    | 1.5 (1.1 to 1.9)   | 0 (0 to 0)   | 0.4 (0.2 to 0.7) | 0 (0 to 0)    | 0 (0 to 0.1)   | 0 (0 to 0) | 0.3 (0.1 to 0.4) | 0 (0 to 0)  | 0.2 (0 to 0.8) | 0 (0 to 0) | 0.4 (0.2 to 0.7) | 0 (0 to 1)  | 1 (0.2 to 2.3)   | 0 (0 to 0)  | 0.1 (0.1 to 0.2) | 0 (0 to 0)  | 0.3 (0.1 to 0.6) |
| Saint Lucia                      | Both   | 13 (10 to 15) | 5.8 (4.9 to 7)     | 4 (2 to 7)   | 1.8 (0.7 to 3.1) | 0 (0 to 0)    | 0.1 (0 to 0.2) | 1 (0 to 1) | 0.3 (0.2 to 0.5) | 1 (0 to 3)  | 0.3 (0 to 1.3) | 1 (0 to 1) | 0.4 (0.1 to 0.7) | 4 (1 to 9)  | 1.9 (0.5 to 4.1) | 1 (1 to 1)  | 0.4 (0.3 to 0.7) | 2 (1 to 3)  | 0.8 (0.4 to 1.2) |
|                                  | Male   | 11 (9 to 13)  | 10.6 (8.8 to 12.7) | 3 (1 to 5)   | 2.6 (1 to 4.5)   | 0 (0 to 0)    | 0.1 (0 to 0.3) | 0 (0 to 1) | 0.5 (0.2 to 0.8) | 0 (0 to 2)  | 0.5 (0 to 1.9) | 1 (0 to 1) | 0.6 (0.1 to 1)   | 3 (0 to 6)  | 2.8 (0.5 to 6.1) | 1 (0 to 1)  | 0.8 (0.4 to 1.3) | 1 (1 to 2)  | 1.2 (0.5 to 2)   |
|                                  | Female | 2 (2 to 3)    | 1.7 (1.3 to 2.3)   | 1 (0 to 2)   | 1.1 (0.4 to 1.9) | 0 (0 to 0)    | 0.1 (0 to 0.2) | 0 (0 to 0) | 0.2 (0.1 to 0.3) | 0 (0 to 1)  | 0.2 (0 to 0.8) | 0 (0 to 1) | 0.3 (0.1 to 0.4) | 1 (0 to 3)  | 1.3 (0.3 to 2.8) | 0 (0 to 0)  | 0.2 (0.1 to 0.3) | 0 (0 to 1)  | 0.4 (0.2 to 0.6) |
| Saint Vincent and the Grenadines | Both   | 5 (5 to 6)    | 4 (3.5 to 4.8)     | 2 (1 to 4)   | 1.5 (0.5 to 2.6) | 0 (0 to 0)    | 0.1 (0 to 0.2) | 0 (0 to 1) | 0.3 (0.2 to 0.5) | 0 (0 to 1)  | 0.3 (0 to 1.1) | 0 (0 to 1) | 0.3 (0.1 to 0.4) | 2 (1 to 4)  | 1.5 (0.4 to 3.3) | 1 (0 to 1)  | 0.5 (0.3 to 0.7) | 1 (0 to 1)  | 0.6 (0.3 to 1)   |
|                                  | Male   | 5 (4 to 6)    | 6.7 (5.8 to 8)     | 1 (0 to 2)   | 1.9 (0.7 to 3.4) | 0 (0 to 0)    | 0.1 (0 to 0.2) | 0 (0 to 0) | 0.4 (0.2 to 0.6) | 0 (0 to 1)  | 0.4 (0 to 1.4) | 0 (0 to 0) | 0.3 (0.1 to 0.5) | 1 (0 to 3)  | 1.9 (0.4 to 4.3) | 1 (0 to 1)  | 0.9 (0.5 to 1.4) | 1 (0 to 1)  | 0.9 (0.4 to 1.5) |
|                                  | Female | 1 (1 to 1)    | 1.2 (1 to 1.6)     | 1 (0 to 1)   | 1.1 (0.4 to 1.9) | 0 (0 to 0)    | 0.1 (0 to 0.2) | 0 (0 to 0) | 0.2 (0.1 to 0.4) | 0 (0 to 1)  | 0.2 (0 to 0.8) | 0 (0 to 0) | 0.2 (0 to 0.3)   | 1 (0 to 2)  | 1.1 (0.2 to 2.5) | 0 (0 to 0)  | 0.1 (0 to 0.2)   | 0 (0 to 0)  | 0.3 (0.1 to 0.5) |

|                       |        |                  |                     |                  |                  |            |                  |                 |                  |              |                  |               |                  |                 |                   |              |                    |                |                  |
|-----------------------|--------|------------------|---------------------|------------------|------------------|------------|------------------|-----------------|------------------|--------------|------------------|---------------|------------------|-----------------|-------------------|--------------|--------------------|----------------|------------------|
| Samoa                 | Both   | 11 (8 to 14)     | 7.9 (6 to 9.9)      | 1 (0 to 2)       | 0.6 (0.2 to 1.4) | 3 (2 to 4) | 2 (1.2 to 3)     | 1 (1 to 2)      | 0.9 (0.5 to 1.5) | 0 (0 to 2)   | 0.3 (0 to 1.3)   | 1 (0 to 1)    | 0.5 (0.2 to 0.9) | 2 (1 to 5)      | 1.6 (0.4 to 3.7)  | 1 (0 to 1)   | 0.6 (0.3 to 1)     | 1 (0 to 1)     | 0.4 (0.2 to 0.6) |
|                       | Male   | 9 (6 to 11)      | 12.7 (9.2 to 16.2)  | 1 (0 to 1)       | 0.9 (0.3 to 2.1) | 2 (1 to 3) | 2.5 (1.3 to 4)   | 1 (0 to 1)      | 1.2 (0.6 to 1.9) | 0 (0 to 1)   | 0.5 (0 to 1.9)   | 1 (0 to 1)    | 0.7 (0.2 to 1.3) | 1 (0 to 3)      | 2.3 (0.4 to 5.2)  | 1 (0 to 1)   | 1.2 (0.6 to 2.1)   | 0 (0 to 1)     | 0.6 (0.2 to 1.1) |
|                       | Female | 3 (2 to 3)       | 3.5 (2.6 to 4.7)    | 0 (0 to 1)       | 0.3 (0.1 to 0.8) | 1 (1 to 2) | 1.5 (0.9 to 2.2) | 1 (0 to 1)      | 0.7 (0.4 to 1.2) | 0 (0 to 1)   | 0.2 (0 to 0.8)   | 0 (0 to 0)    | 0.4 (0.1 to 0.6) | 1 (0 to 2)      | 1.1 (0.2 to 2.6)  | 0 (0 to 0)   | 0.1 (0 to 0.2)     | 0 (0 to 0)     | 0.2 (0.1 to 0.3) |
| San Marino            | Both   | 14 (9 to 20)     | 21.7 (13.9 to 31.8) | 1 (0 to 3)       | 2 (0.7 to 4)     | 0 (0 to 0) | 0 (0 to 0)       | 1 (0 to 2)      | 1.6 (0.7 to 2.8) | 1 (0 to 4)   | 1.6 (0.1 to 5.6) | 1 (0 to 1)    | 1 (0.2 to 1.7)   | 2 (0 to 5)      | 2.9 (0.6 to 7.5)  | 6 (3 to 9)   | 8 (4.1 to 13.5)    | 1 (0 to 2)     | 1.3 (0.2 to 2.9) |
|                       | Male   | 10 (7 to 15)     | 34.8 (22.4 to 49.3) | 1 (0 to 2)       | 3.1 (1.1 to 5.9) | 0 (0 to 0) | 0 (0 to 0)       | 1 (0 to 1)      | 2.3 (1.1 to 4.1) | 1 (0 to 3)   | 2.4 (0.2 to 8.4) | 0 (0 to 1)    | 1.4 (0.3 to 2.6) | 1 (0 to 4)      | 4.6 (0.8 to 11.9) | 5 (3 to 8)   | 15.8 (8.2 to 26.5) | 1 (0 to 1)     | 2.1 (0.3 to 4.7) |
|                       | Female | 3 (2 to 5)       | 10 (6.1 to 15.9)    | 0 (0 to 1)       | 1.1 (0.4 to 2.3) | 0 (0 to 0) | 0 (0 to 0)       | 0 (0 to 0)      | 0.9 (0.4 to 1.7) | 0 (0 to 1)   | 0.9 (0.1 to 3.1) | 0 (0 to 0)    | 0.5 (0.1 to 1.1) | 1 (0 to 1)      | 1.4 (0.3 to 4.1)  | 1 (0 to 1)   | 1.3 (0.4 to 2.9)   | 0 (0 to 0)     | 0.5 (0.1 to 1.2) |
| São Tome and Príncipe | Both   | 5 (4 to 7)       | 5.8 (4.6 to 7.3)    | 2 (1 to 4)       | 2.3 (1.1 to 3.9) | 3 (2 to 5) | 3.4 (2 to 5)     | 0 (0 to 0)      | 0.2 (0.1 to 0.4) | 1 (0 to 4)   | 1 (0.1 to 3.7)   | 0 (0 to 1)    | 0.4 (0.1 to 0.7) | 2 (0 to 3)      | 1.8 (0.4 to 4)    | 0 (0 to 1)   | 0.4 (0.2 to 1)     | 1 (0 to 1)     | 0.5 (0.2 to 0.9) |
|                       | Male   | 5 (4 to 6)       | 11.3 (8.9 to 14.1)  | 2 (1 to 3)       | 3.6 (1.7 to 6.1) | 2 (1 to 3) | 4.9 (2.8 to 7.1) | 0 (0 to 0)      | 0.3 (0.2 to 0.5) | 1 (0 to 2)   | 1.5 (0.1 to 5.4) | 0 (0 to 0)    | 0.6 (0.1 to 1)   | 1 (0 to 3)      | 2.7 (0.5 to 6.5)  | 0 (0 to 1)   | 0.8 (0.3 to 2)     | 0 (0 to 1)     | 0.8 (0.3 to 1.5) |
|                       | Female | 0 (0 to 1)       | 1 (0.5 to 1.5)      | 1 (0 to 1)       | 1.1 (0.4 to 2.1) | 1 (1 to 2) | 2.2 (1 to 3.6)   | 0 (0 to 0)      | 0.1 (0.1 to 0.3) | 0 (0 to 1)   | 0.6 (0 to 2.2)   | 0 (0 to 0)    | 0.2 (0.1 to 0.5) | 0 (0 to 1)      | 0.9 (0.2 to 2.7)  | 0 (0 to 0)   | 0.1 (0 to 0.3)     | 0 (0 to 0)     | 0.1 (0.1 to 0.3) |
| Saudi Arabia          | Both   | 792 (596 to 991) | 5.1 (3.9 to 6.4)    | 421 (283 to 568) | 2.6 (1.8 to 3.5) | 1 (0 to 2) | 0 (0 to 0)       | 117 (68 to 179) | 0.7 (0.4 to 1.1) | 24 (4 to 65) | 0.1 (0 to 0.4)   | 55 (13 to 92) | 0.3 (0.1 to 0.5) | 184 (41 to 403) | 1.4 (0.3 to 2.9)  | 10 (4 to 18) | 0.1 (0 to 0.2)     | 89 (38 to 162) | 0.4 (0.2 to 0.7) |
|                       | Male   | 750 (559 to 950) | 8.1 (6.2)           | 314 (209)        | 3.3 (2.3)        | 1 (0 to 1) | 0 (0 to 0)       | 75 (42 to 117)  | 0.8 (0.5)        | 18 (3 to 47) | 0.2 (0 to 0.5)   | 40 (9 to 68)  | 0.4 (0.1)        | 144 (26 to 326) | 1.8 (0.3 to 4)    | 8 (3 to 16)  | 0.1 (0 to 0.2)     | 86 (36 to 158) | 0.6 (0.3)        |

|            |        |                              |                              |                             |                            |                           |                           |                           |                           |                        |                            |                       |                           |                            |                            |                           |                           |                       |                           |
|------------|--------|------------------------------|------------------------------|-----------------------------|----------------------------|---------------------------|---------------------------|---------------------------|---------------------------|------------------------|----------------------------|-----------------------|---------------------------|----------------------------|----------------------------|---------------------------|---------------------------|-----------------------|---------------------------|
|            |        |                              | to<br>10.1)                  | to<br>429)                  | to<br>4.5)                 |                           |                           |                           | to<br>1.3)                |                        |                            |                       | to<br>0.7)                |                            |                            |                           |                           |                       | to<br>1.1)                |
|            | Female | 42 (27<br>to 61)             | 0.8<br>(0.5<br>to<br>1.1)    | 108<br>(70 to<br>151)       | 1.5 (1<br>to<br>2.1)       | 0 (0 to<br>1)             | 0 (0<br>to 0)             | 42 (24<br>to 66)          | 0.5<br>(0.3<br>to<br>0.8) | 6 (1 to<br>16)         | 0.1 (0<br>to<br>0.2)       | 15 (4<br>to 24)       | 0.2 (0<br>to<br>0.3)      | 41 (8<br>to 96)            | 0.7<br>(0.2<br>to<br>1.7)  | 2 (1 to<br>4)             | 0 (0<br>to<br>0.1)        | 3 (1 to<br>6)         | 0 (0<br>to<br>0.1)        |
| Senegal    | Both   | 344<br>(256 to<br>472)       | 4.9<br>(3.6<br>to<br>6.7)    | 95 (43<br>to<br>178)        | 1.4<br>(0.6<br>to<br>2.5)  | 219<br>(132<br>to<br>332) | 3.2<br>(1.9<br>to<br>4.8) | 47 (24<br>to 77)          | 0.7<br>(0.4<br>to<br>1.1) | 40 (3<br>to<br>150)    | 0.6 (0<br>to<br>2.2)       | 54 (19<br>to 88)      | 0.8<br>(0.3<br>to<br>1.3) | 89 (19<br>to<br>205)       | 1.4<br>(0.3<br>to<br>3.2)  | 32 (14<br>to 61)          | 0.5<br>(0.2<br>to 1)      | 32 (13<br>to 60)      | 0.4<br>(0.2<br>to<br>0.7) |
|            | Male   | 333<br>(247 to<br>459)       | 9.8<br>(7.3<br>to<br>13.5)   | 76 (35<br>to<br>147)        | 2.3<br>(1.1<br>to<br>4.4)  | 159<br>(92 to<br>252)     | 4.8<br>(2.8<br>to<br>7.5) | 32 (17<br>to 55)          | 1 (0.5<br>to<br>1.7)      | 30 (2<br>to<br>111)    | 0.9<br>(0.1<br>to<br>3.3)  | 40 (14<br>to 69)      | 1.2<br>(0.4<br>to<br>2.1) | 68 (12<br>to<br>168)       | 2.2<br>(0.4<br>to<br>5.4)  | 29 (12<br>to 59)          | 0.9<br>(0.4<br>to<br>1.9) | 27 (11<br>to 52)      | 0.7<br>(0.3<br>to<br>1.3) |
|            | Female | 11 (7<br>to 16)              | 0.3<br>(0.2<br>to<br>0.4)    | 19 (8<br>to 36)             | 0.5<br>(0.2<br>to 1)       | 61 (39<br>to 92)          | 1.7<br>(1.1<br>to<br>2.5) | 14 (8<br>to 23)           | 0.4<br>(0.2<br>to<br>0.6) | 10 (1<br>to 36)        | 0.3 (0<br>to 1)            | 13 (5<br>to 22)       | 0.4<br>(0.1<br>to<br>0.6) | 22 (4<br>to 52)            | 0.6<br>(0.1<br>to<br>1.5)  | 3 (1 to<br>5)             | 0.1 (0<br>to<br>0.2)      | 5 (2 to<br>9)         | 0.1 (0<br>to<br>0.2)      |
| Serbia     | Both   | 5580<br>(4370<br>to<br>6960) | 34.9<br>(27.2<br>to<br>43.5) | 1200<br>(800<br>to<br>1670) | 7.6<br>(5.1<br>to<br>10.6) | 202<br>(61 to<br>471)     | 1.3<br>(0.4<br>to<br>3)   | 489<br>(276<br>to<br>773) | 3.1<br>(1.8<br>to<br>4.9) | 449<br>(47 to<br>1260) | 2.8<br>(0.3<br>to<br>7.9)  | 164<br>(33 to<br>270) | 1.1<br>(0.2<br>to<br>1.8) | 852<br>(184<br>to<br>1950) | 5.1<br>(1.1<br>to<br>11.7) | 398<br>(201<br>to<br>682) | 2.3<br>(1.2<br>to 4)      | 275<br>(39 to<br>566) | 1.8<br>(0.3<br>to<br>3.7) |
|            | Male   | 4250<br>(3320<br>to<br>5330) | 57.4<br>(44.6<br>to<br>71.8) | 871<br>(593<br>to<br>1220)  | 11.9<br>(8 to<br>16.4)     | 129<br>(36 to<br>305)     | 1.8<br>(0.5<br>to<br>4.1) | 349<br>(194<br>to<br>550) | 4.8<br>(2.7<br>to<br>7.5) | 324<br>(34 to<br>906)  | 4.4<br>(0.5<br>to<br>12.3) | 114<br>(23 to<br>196) | 1.6<br>(0.3<br>to<br>2.7) | 642<br>(113<br>to<br>1530) | 8.5<br>(1.5<br>to<br>20.3) | 358<br>(171<br>to<br>629) | 4.6<br>(2.2<br>to 8)      | 212<br>(30 to<br>440) | 2.9<br>(0.4<br>to 6)      |
|            | Female | 1330<br>(1040<br>to<br>1680) | 15.7<br>(12.3<br>to 20)      | 323<br>(216<br>to<br>451)   | 3.9<br>(2.6<br>to<br>5.4)  | 73 (24<br>to<br>167)      | 0.9<br>(0.3<br>to 2)      | 140<br>(79 to<br>228)     | 1.7 (1<br>to<br>2.8)      | 124<br>(13 to<br>349)  | 1.5<br>(0.2<br>to<br>4.1)  | 49 (11<br>to 83)      | 0.6<br>(0.1<br>to 1)      | 210<br>(41 to<br>502)      | 2.3<br>(0.5<br>to<br>5.6)  | 40 (21<br>to 70)          | 0.4<br>(0.2<br>to<br>0.8) | 62 (8<br>to<br>133)   | 0.8<br>(0.1<br>to<br>1.7) |
| Seychelles | Both   | 12 (10<br>to 14)             | 11<br>(9.3<br>to 13)         | 2 (1 to<br>4)               | 2 (1<br>to<br>3.3)         | 0 (0 to<br>0)             | 0 (0<br>to 0.1)           | 1 (1 to<br>2)             | 0.9<br>(0.5<br>to<br>1.5) | 0 (0 to<br>1)          | 0.4 (0<br>to<br>1.3)       | 1 (0 to<br>1)         | 0.7<br>(0.2<br>to<br>1.2) | 3 (1 to<br>6)              | 2.9<br>(0.7<br>to<br>6.2)  | 1 (0 to<br>1)             | 0.6<br>(0.3<br>to<br>1.1) | 1 (1 to<br>2)         | 1 (0.5<br>to<br>1.6)      |
|            | Male   | 11 (9<br>to 13)              | 22.7<br>(19 to<br>26.9)      | 2 (1 to<br>3)               | 3.3<br>(1.7<br>to<br>5.5)  | 0 (0 to<br>0)             | 0 (0<br>to 0.1)           | 1 (0 to<br>1)             | 1.3<br>(0.7<br>to<br>2.1) | 0 (0 to<br>1)          | 0.6<br>(0.1<br>to<br>2.2)  | 1 (0 to<br>1)         | 1.2<br>(0.3<br>to<br>1.9) | 2 (0 to<br>5)              | 4.9<br>(0.9<br>to<br>10.9) | 1 (0 to<br>1)             | 1.4<br>(0.7<br>to<br>2.8) | 1 (0 to<br>2)         | 1.6<br>(0.7<br>to<br>2.7) |
|            | Female | 1 (1 to<br>1)                | 1.8<br>(1.3<br>to<br>2.4)    | 1 (0 to<br>1)               | 1 (0.5<br>to<br>1.6)       | 0 (0 to<br>0)             | 0 (0<br>to 0)             | 0 (0 to<br>1)             | 0.6<br>(0.3<br>to<br>0.9) | 0 (0 to<br>0)          | 0.2 (0<br>to<br>0.6)       | 0 (0 to<br>0)         | 0.4<br>(0.1<br>to<br>0.6) | 1 (0 to<br>2)              | 1.4<br>(0.3<br>to<br>3.1)  | 0 (0 to<br>0)             | 0.1 (0<br>to<br>0.2)      | 0 (0 to<br>0)         | 0.4<br>(0.2<br>to<br>0.7) |



|              |        |                        |                        |                     |                     |                    |                     |                    |                     |                    |                     |                    |                     |                    |                      |                     |                     |                    |                     |
|--------------|--------|------------------------|------------------------|---------------------|---------------------|--------------------|---------------------|--------------------|---------------------|--------------------|---------------------|--------------------|---------------------|--------------------|----------------------|---------------------|---------------------|--------------------|---------------------|
| Sierra Leone | Both   | 155<br>(106 to 214)    | 4.7<br>(3.3 to 6.5)    | 26 (11 to 51)       | 0.8<br>(0.3 to 1.5) | 110<br>(68 to 168) | 3.3<br>(2.1 to 5.1) | 11 (5 to 19)       | 0.3<br>(0.2 to 0.6) | 17 (1 to 64)       | 0.5 (0 to 1.8)      | 21 (7 to 35)       | 0.6<br>(0.2 to 1.1) | 17 (4 to 42)       | 0.6<br>(0.1 to 1.4)  | 7 (3 to 19)         | 0.2<br>(0.1 to 0.6) | 15 (6 to 29)       | 0.4<br>(0.2 to 0.7) |
|              | Male   | 146<br>(99 to 202)     | 9 (6.2 to 12.4)        | 21 (8 to 42)        | 1.3<br>(0.5 to 2.6) | 81 (48 to 127)     | 5 (3 to 7.8)        | 7 (3 to 13)        | 0.5<br>(0.2 to 0.8) | 13 (1 to 50)       | 0.8 (0 to 2.9)      | 16 (5 to 27)       | 1 (0.3 to 1.6)      | 13 (2 to 32)       | 0.8<br>(0.1 to 2.1)  | 6 (2 to 17)         | 0.4<br>(0.2 to 1.2) | 12 (5 to 23)       | 0.6<br>(0.2 to 1.1) |
|              | Female | 9 (6 to 14)            | 0.5<br>(0.3 to 0.8)    | 5 (2 to 10)         | 0.3<br>(0.1 to 0.6) | 29 (19 to 45)      | 1.7<br>(1.1 to 2.6) | 4 (2 to 7)         | 0.2<br>(0.1 to 0.4) | 4 (0 to 16)        | 0.2 (0 to 0.9)      | 5 (2 to 9)         | 0.3<br>(0.1 to 0.5) | 5 (1 to 12)        | 0.3<br>(0.1 to 0.8)  | 1 (0 to 2)          | 0.1 (0 to 0.2)      | 3 (1 to 6)         | 0.2<br>(0.1 to 0.3) |
| Singapore    | Both   | 831<br>(744 to 907)    | 11<br>(9.8 to 12.1)    | 209<br>(129 to 304) | 2.8<br>(1.7 to 4)   | 0 (0 to 1)         | 0 (0 to 0)          | 39 (22 to 62)      | 0.5<br>(0.3 to 0.8) | 15 (1 to 52)       | 0.2 (0 to 0.7)      | 38 (8 to 60)       | 0.5<br>(0.1 to 0.8) | 154<br>(36 to 337) | 2.1<br>(0.5 to 4.6)  | 200<br>(124 to 293) | 2.9<br>(1.8 to 4.2) | 58 (10 to 111)     | 0.7<br>(0.1 to 1.3) |
|              | Male   | 671<br>(600 to 731)    | 19.4<br>(17.3 to 21.3) | 135<br>(83 to 197)  | 3.9<br>(2.4 to 5.7) | 0 (0 to 1)         | 0 (0 to 0)          | 24 (13 to 38)      | 0.7<br>(0.4 to 1)   | 10 (1 to 34)       | 0.3 (0 to 1)        | 24 (5 to 38)       | 0.7<br>(0.1 to 1.1) | 109<br>(18 to 248) | 3.2<br>(0.6 to 7.4)  | 182<br>(111 to 265) | 6.1<br>(3.7 to 8.9) | 42 (7 to 82)       | 1 (0.2 to 2)        |
|              | Female | 160<br>(130 to 194)    | 3.9<br>(3.2 to 4.8)    | 74 (45 to 110)      | 1.8<br>(1.1 to 2.7) | 0 (0 to 0)         | 0 (0 to 0)          | 16 (9 to 24)       | 0.4<br>(0.2 to 0.6) | 5 (0 to 18)        | 0.1 (0 to 0.4)      | 15 (3 to 23)       | 0.4<br>(0.1 to 0.6) | 45 (9 to 107)      | 1.1<br>(0.2 to 2.7)  | 18 (6 to 40)        | 0.4<br>(0.2 to 1)   | 16 (2 to 32)       | 0.4<br>(0.1 to 0.8) |
| Slovakia     | Both   | 1720<br>(1330 to 2210) | 18.2<br>(14.1 to 23.4) | 334<br>(222 to 481) | 3.6<br>(2.4 to 5.1) | 3 (1 to 8)         | 0 (0 to 0.1)        | 136<br>(73 to 221) | 1.5<br>(0.8 to 2.4) | 211<br>(29 to 500) | 2.3<br>(0.3 to 5.3) | 118<br>(36 to 195) | 1.3<br>(0.4 to 2.1) | 219<br>(43 to 520) | 2.3<br>(0.5 to 5.4)  | 115<br>(59 to 206)  | 1.2<br>(0.6 to 2.1) | 115<br>(17 to 236) | 1.2<br>(0.2 to 2.5) |
|              | Male   | 1440<br>(1100 to 1880) | 36<br>(27.5 to 46.9)   | 254<br>(168 to 367) | 6.4<br>(4.2 to 9.2) | 2 (0 to 6)         | 0.1 (0 to 0.1)      | 100<br>(53 to 168) | 2.5<br>(1.3 to 4.2) | 160<br>(22 to 382) | 4 (0.6 to 9.6)      | 89 (27 to 149)     | 2.2<br>(0.7 to 3.7) | 172<br>(29 to 435) | 4.3<br>(0.7 to 10.9) | 104<br>(49 to 190)  | 2.6<br>(1.3 to 4.8) | 96 (14 to 199)     | 2.2<br>(0.3 to 4.6) |
|              | Female | 278<br>(212 to 352)    | 5.3<br>(4.1 to 6.8)    | 80 (53 to 115)      | 1.5 (1 to 2.2)      | 1 (0 to 3)         | 0 (0 to 0)          | 35 (19 to 58)      | 0.7<br>(0.4 to 1.1) | 51 (8 to 117)      | 1 (0.1 to 2.2)      | 29 (9 to 47)       | 0.5<br>(0.2 to 0.9) | 47 (9 to 118)      | 0.8<br>(0.2 to 2.1)  | 11 (6 to 20)        | 0.2<br>(0.1 to 0.3) | 19 (2 to 41)       | 0.4 (0 to 0.8)      |
| Slovenia     | Both   | 909<br>(705 to 1180)   | 21.6<br>(16.7 to 28.2) | 154<br>(100 to 223) | 3.6<br>(2.3 to 5.3) | 11 (2 to 29)       | 0.3<br>(0.1 to 0.7) | 79 (45 to 126)     | 1.9<br>(1.1 to 3.1) | 94 (12 to 232)     | 2.2<br>(0.3 to 5.5) | 35 (8 to 59)       | 0.8<br>(0.2 to 1.4) | 115<br>(25 to 267) | 2.6<br>(0.5 to 6.1)  | 258<br>(144 to 412) | 5.7<br>(3.2 to 9.3) | 48 (7 to 99)       | 1.2<br>(0.2 to 2.5) |
|              | Male   | 679<br>(523 to 883)    | 35.5<br>(27.3 to 43.7) | 108<br>(70 to 156)  | 5.7<br>(3.7 to 7.7) | 7 (1 to 18)        | 0.3<br>(0.1 to 1)   | 57 (32 to 91)      | 3 (1.7 to 4.9)      | 66 (9 to 163)      | 3.5<br>(0.5 to 6.5) | 24 (5 to 41)       | 1.3<br>(0.3 to 2.3) | 85 (15 to 204)     | 4.4<br>(0.8 to 8)    | 234<br>(128 to 340) | 12<br>(6.6 to 17.4) | 36 (5 to 75)       | 1.9<br>(0.3 to 3.5) |

|                    |        |                              |                            |                              |                           |                       |                             |                           |                           |                       |                           |                           |                           |                            |                            |                             |                            |                       |                           |
|--------------------|--------|------------------------------|----------------------------|------------------------------|---------------------------|-----------------------|-----------------------------|---------------------------|---------------------------|-----------------------|---------------------------|---------------------------|---------------------------|----------------------------|----------------------------|-----------------------------|----------------------------|-----------------------|---------------------------|
|                    |        |                              | to<br>46.3)                |                              | to<br>8.2)                |                       |                             |                           |                           |                       | to<br>8.6)                |                           | to<br>2.2)                |                            | to<br>10.6)                | to<br>376)                  | to<br>19.3)                |                       | to<br>3.9)                |
|                    | Female | 230<br>(173 to<br>301)       | 10.3<br>(7.7 to<br>13.4)   | 46 (29<br>to 68)             | 2 (1.3<br>to 3)           | 4 (1 to<br>11)        | 0.2 (0<br>to<br>0.5)        | 22 (13<br>to 36)          | 1 (0.6<br>to<br>1.6)      | 28 (4<br>to 69)       | 1.2<br>(0.2<br>to 3)      | 11 (3<br>to 19)           | 0.5<br>(0.1<br>to<br>0.8) | 30 (6<br>to 72)            | 1.2<br>(0.2<br>to<br>2.9)  | 24 (10<br>to 43)            | 0.9<br>(0.4<br>to<br>1.6)  | 12 (1<br>to 25)       | 0.6<br>(0.1<br>to<br>1.3) |
| Solomon<br>Islands | Both   | 61 (32<br>to 101)            | 22<br>(12.6<br>to<br>35.2) | 3 (1 to<br>9)                | 1 (0.2<br>to<br>2.9)      | 30 (14<br>to 52)      | 10.1<br>(5.2<br>to<br>17.1) | 5 (2 to<br>11)            | 1.9<br>(0.8<br>to<br>3.7) | 3 (0 to<br>13)        | 1.1<br>(0.1<br>to<br>4.5) | 5 (1 to<br>10)            | 1.7<br>(0.5<br>to<br>3.4) | 13 (2<br>to 34)            | 4.7<br>(0.9<br>to<br>12.1) | 6 (2 to<br>12)              | 2.6<br>(1.2<br>to<br>4.9)  | 7 (2 to<br>15)        | 1.9<br>(0.6<br>to<br>3.9) |
|                    | Male   | 54 (27<br>to 94)             | 38.4<br>(21.2<br>to 64)    | 3 (1 to<br>8)                | 1.7<br>(0.4<br>to<br>5.1) | 24 (11<br>to 46)      | 16<br>(7.8<br>to<br>29.4)   | 4 (2 to<br>9)             | 2.8<br>(1.1<br>to<br>5.9) | 3 (0 to<br>11)        | 1.7<br>(0.1<br>to<br>7.4) | 4 (1 to<br>9)             | 2.7<br>(0.7<br>to<br>5.6) | 11 (2<br>to 30)            | 7.8<br>(1.4<br>to<br>21.6) | 6 (2 to<br>12)              | 4.8<br>(2.1<br>to<br>9.2)  | 6 (2 to<br>13)        | 2.9<br>(0.9<br>to<br>6.5) |
|                    | Female | 7 (4 to<br>10)               | 4.9<br>(3.2<br>to<br>7.2)  | 0 (0 to<br>1)                | 0.3<br>(0.1<br>to<br>0.8) | 6 (3 to<br>9)         | 4 (2.4<br>to<br>6.3)        | 1 (1 to<br>3)             | 0.9<br>(0.4<br>to<br>1.6) | 1 (0 to<br>2)         | 0.4 (0<br>to<br>1.7)      | 1 (0 to<br>2)             | 0.7<br>(0.2<br>to<br>1.2) | 2 (0 to<br>5)              | 1.4<br>(0.3<br>to<br>3.3)  | 0 (0 to<br>1)               | 0.3<br>(0.1<br>to<br>0.7)  | 2 (1 to<br>3)         | 0.8<br>(0.3<br>to<br>1.6) |
| Somalia            | Both   | 137<br>(73 to<br>240)        | 2.3<br>(1.2<br>to 4)       | 5 (1 to<br>17)               | 0.1 (0<br>to<br>0.3)      | 154<br>(69 to<br>329) | 2.4<br>(1.1<br>to<br>5.1)   | 8 (3 to<br>16)            | 0.1 (0<br>to<br>0.2)      | 12 (1<br>to 53)       | 0.2 (0<br>to<br>0.8)      | 23 (7<br>to 45)           | 0.4<br>(0.1<br>to<br>0.7) | 22 (4<br>to 61)            | 0.4<br>(0.1<br>to<br>1.1)  | 12 (2<br>to 58)             | 0.2 (0<br>to<br>1.1)       | 33 (11<br>to 69)      | 0.4<br>(0.1<br>to<br>0.9) |
|                    | Male   | 131<br>(69 to<br>230)        | 5.6 (3<br>to<br>9.6)       | 4 (1 to<br>15)               | 0.2 (0<br>to<br>0.6)      | 121<br>(53 to<br>269) | 4.8<br>(2.1<br>to<br>10.5)  | 6 (2 to<br>13)            | 0.2<br>(0.1<br>to<br>0.5) | 10 (1<br>to 42)       | 0.4 (0<br>to<br>1.7)      | 18 (5<br>to 38)           | 0.7<br>(0.2<br>to<br>1.5) | 18 (2<br>to 51)            | 0.8<br>(0.1<br>to<br>2.3)  | 10 (1<br>to 55)             | 0.5<br>(0.1<br>to<br>2.9)  | 27 (9<br>to 60)       | 0.8<br>(0.3<br>to<br>1.7) |
|                    | Female | 6 (2 to<br>11)               | 0.2<br>(0.1<br>to<br>0.3)  | 1 (0 to<br>2)                | 0 (0<br>to<br>0.1)        | 33 (14<br>to 79)      | 0.9<br>(0.4<br>to<br>2.2)   | 2 (1 to<br>4)             | 0.1 (0<br>to<br>0.1)      | 2 (0 to<br>10)        | 0.1 (0<br>to<br>0.3)      | 5 (1 to<br>10)            | 0.1 (0<br>to<br>0.3)      | 4 (1 to<br>11)             | 0.1 (0<br>to<br>0.3)       | 2 (0 to<br>6)               | 0.1 (0<br>to<br>0.2)       | 5 (2 to<br>12)        | 0.1 (0<br>to<br>0.3)      |
| South<br>Africa    | Both   | 4800<br>(4210<br>to<br>5540) | 11<br>(9.7<br>to<br>12.6)  | 1430<br>(1000<br>to<br>1980) | 3.3<br>(2.3<br>to<br>4.5) | 172<br>(80 to<br>317) | 0.4<br>(0.2<br>to<br>0.7)   | 320<br>(164<br>to<br>519) | 0.7<br>(0.4<br>to<br>1.2) | 401<br>(68 to<br>984) | 0.9<br>(0.2<br>to<br>2.3) | 497<br>(171<br>to<br>781) | 1.1<br>(0.4<br>to<br>1.8) | 825<br>(194<br>to<br>1800) | 2 (0.5<br>to<br>4.3)       | 1460<br>(998<br>to<br>2010) | 3.6<br>(2.5<br>to<br>4.9)  | 168<br>(81 to<br>276) | 0.3<br>(0.2<br>to<br>0.5) |
|                    | Male   | 3720<br>(3210<br>to<br>4350) | 20.8<br>(18.1<br>to 24)    | 971<br>(672<br>to<br>1370)   | 5.4<br>(3.7<br>to<br>7.6) | 109<br>(47 to<br>207) | 0.6<br>(0.3<br>to<br>1.1)   | 190<br>(97 to<br>314)     | 1.1<br>(0.5<br>to<br>1.7) | 270<br>(45 to<br>673) | 1.5<br>(0.3<br>to<br>3.7) | 335<br>(114<br>to<br>541) | 1.8<br>(0.6<br>to 3)      | 522<br>(89 to<br>1210)     | 3.1<br>(0.5<br>to<br>7.1)  | 1280<br>(827<br>to<br>1780) | 8.2<br>(5.5<br>to<br>11.4) | 132<br>(60 to<br>222) | 0.6<br>(0.3<br>to 1)      |
|                    | Female | 1080<br>(914 to<br>1260)     | 4.4<br>(3.7<br>to 5)       | 458<br>(314<br>to<br>627)    | 1.8<br>(1.3<br>to<br>2.5) | 63 (31<br>to<br>112)  | 0.3<br>(0.1<br>to<br>0.5)   | 129<br>(68 to<br>207)     | 0.5<br>(0.3<br>to<br>0.8) | 131<br>(22 to<br>311) | 0.5<br>(0.1<br>to<br>1.3) | 162<br>(58 to<br>247)     | 0.6<br>(0.2<br>to 1)      | 302<br>(60 to<br>693)      | 1.2<br>(0.2<br>to<br>2.8)  | 189<br>(80 to<br>284)       | 0.8<br>(0.3<br>to<br>1.2)  | 37 (16<br>to 62)      | 0.1<br>(0.1<br>to<br>0.2) |

|             |        |                           |                        |                       |                     |                     |                     |                       |                     |                       |                     |                     |                     |                       |                      |                        |                       |                      |                     |
|-------------|--------|---------------------------|------------------------|-----------------------|---------------------|---------------------|---------------------|-----------------------|---------------------|-----------------------|---------------------|---------------------|---------------------|-----------------------|----------------------|------------------------|-----------------------|----------------------|---------------------|
| South Sudan | Both   | 123<br>(74 to 181)        | 3.8<br>(2.3 to 5.6)    | 21 (7 to 42)          | 0.6<br>(0.2 to 1.2) | 97 (55 to 153)      | 2.8<br>(1.6 to 4.4) | 8 (3 to 14)           | 0.2<br>(0.1 to 0.4) | 11 (1 to 47)          | 0.3 (0 to 1.4)      | 13 (3 to 25)        | 0.4<br>(0.1 to 0.7) | 20 (4 to 51)          | 0.6<br>(0.1 to 1.6)  | 9 (2 to 52)            | 0.3<br>(0.1 to 1.8)   | 17 (7 to 33)         | 0.4<br>(0.2 to 0.8) |
|             | Male   | 118<br>(69 to 176)        | 6.8 (4 to 10.1)        | 18 (6 to 36)          | 1 (0.3 to 2)        | 74 (40 to 121)      | 4.1<br>(2.3 to 6.5) | 5 (2 to 10)           | 0.3<br>(0.1 to 0.5) | 9 (1 to 36)           | 0.5 (0 to 2)        | 10 (2 to 19)        | 0.6<br>(0.1 to 1)   | 17 (2 to 43)          | 1 (0.2 to 2.6)       | 7 (1 to 50)            | 0.5<br>(0.1 to 3.2)   | 13 (5 to 26)         | 0.6<br>(0.2 to 1.1) |
|             | Female | 5 (3 to 10)               | 0.4<br>(0.2 to 0.7)    | 4 (1 to 8)            | 0.2<br>(0.1 to 0.5) | 23 (13 to 42)       | 1.3<br>(0.8 to 2.5) | 2 (1 to 4)            | 0.1 (0 to 0.2)      | 2 (0 to 10)           | 0.1 (0 to 0.6)      | 3 (1 to 6)          | 0.2 (0 to 0.3)      | 3 (1 to 9)            | 0.2 (0 to 0.6)       | 2 (1 to 5)             | 0.2 (0 to 0.4)        | 4 (1 to 9)           | 0.2<br>(0.1 to 0.4) |
| Spain       | Both   | 18400<br>(17000 to 19600) | 20.3<br>(18.9 to 21.6) | 1500<br>(894 to 2240) | 1.6 (1 to 2.5)      | 27 (7 to 75)        | 0 (0 to 0.1)        | 1080<br>(630 to 1640) | 1.3<br>(0.7 to 1.9) | 1690<br>(258 to 3910) | 1.8<br>(0.3 to 4.2) | 446<br>(108 to 720) | 0.5<br>(0.1 to 0.8) | 2770<br>(573 to 6110) | 2.9<br>(0.6 to 6.4)  | 4700<br>(2960 to 6590) | 4.6<br>(2.9 to 6.5)   | 818<br>(149 to 1580) | 1 (0.2 to 1.9)      |
|             | Male   | 15600<br>(14400 to 16700) | 37.5<br>(34.6 to 39.9) | 1190<br>(714 to 1780) | 2.9<br>(1.7 to 4.3) | 19 (5 to 53)        | 0 (0 to 0.1)        | 837<br>(486 to 1280)  | 2.1<br>(1.2 to 3.2) | 1340<br>(203 to 3110) | 3.2<br>(0.5 to 7.5) | 342<br>(79 to 579)  | 0.8<br>(0.2 to 1.4) | 2290<br>(402 to 5290) | 5.4<br>(0.9 to 12.4) | 4480<br>(2770 to 6390) | 10.1<br>(6.2 to 14.4) | 703<br>(124 to 1360) | 1.8<br>(0.3 to 3.4) |
|             | Female | 2750<br>(2390 to 3080)    | 6.3<br>(5.5 to 7)      | 310<br>(183 to 467)   | 0.6<br>(0.4 to 1)   | 8 (2 to 21)         | 0 (0 to 0)          | 238<br>(136 to 358)   | 0.5<br>(0.3 to 0.8) | 349<br>(54 to 806)    | 0.7<br>(0.1 to 1.7) | 104<br>(26 to 169)  | 0.2<br>(0.1 to 0.3) | 480<br>(90 to 1110)   | 0.9<br>(0.2 to 2)    | 223<br>(116 to 352)    | 0.4<br>(0.2 to 0.6)   | 115<br>(18 to 234)   | 0.3 (0 to 0.6)      |
| Sri Lanka   | Both   | 1070<br>(748 to 1490)     | 4.2 (3 to 5.8)         | 289<br>(159 to 462)   | 1.1<br>(0.6 to 1.8) | 249<br>(110 to 451) | 1 (0.4 to 1.8)      | 76 (35 to 138)        | 0.3<br>(0.1 to 0.5) | 52 (4 to 197)         | 0.2 (0 to 0.8)      | 135<br>(44 to 232)  | 0.5<br>(0.2 to 0.9) | 375<br>(87 to 862)    | 1.5<br>(0.4 to 3.5)  | 103<br>(49 to 193)     | 0.5<br>(0.2 to 0.8)   | 153<br>(65 to 277)   | 0.5<br>(0.2 to 1)   |
|             | Male   | 996<br>(699 to 1390)      | 9 (6.4 to 12.4)        | 205<br>(113 to 330)   | 1.8 (1 to 2.9)      | 154<br>(63 to 300)  | 1.4<br>(0.6 to 2.7) | 43 (20 to 79)         | 0.4<br>(0.2 to 0.7) | 35 (3 to 135)         | 0.3 (0 to 1.2)      | 92 (30 to 161)      | 0.8<br>(0.3 to 1.4) | 255<br>(44 to 630)    | 2.4<br>(0.4 to 5.7)  | 91 (40 to 170)         | 1 (0.5 to 1.8)        | 127<br>(52 to 235)   | 1 (0.4 to 1.8)      |
|             | Female | 77 (50 to 111)            | 0.6<br>(0.4 to 0.8)    | 84 (46 to 135)        | 0.6<br>(0.3 to 1)   | 95 (44 to 164)      | 0.7<br>(0.3 to 1.2) | 33 (15 to 59)         | 0.2<br>(0.1 to 0.4) | 16 (1 to 64)          | 0.1 (0 to 0.5)      | 42 (14 to 72)       | 0.3<br>(0.1 to 0.5) | 120<br>(27 to 269)    | 0.9<br>(0.2 to 1.9)  | 13 (5 to 26)           | 0.1 (0 to 0.2)        | 26 (10 to 49)        | 0.2<br>(0.1 to 0.3) |
| Sudan       | Both   | 878<br>(536 to 1500)      | 5.2<br>(3.2 to 8.8)    | 285<br>(137 to 510)   | 1.6<br>(0.8 to 2.9) | 175<br>(83 to 327)  | 1 (0.5 to 1.9)      | 118<br>(61 to 213)    | 0.7<br>(0.3 to 1.2) | 43 (3 to 171)         | 0.2 (0 to 1)        | 64 (15 to 117)      | 0.4<br>(0.1 to 0.7) | 172<br>(34 to 446)    | 1.1<br>(0.2 to 2.7)  | 11 (2 to 51)           | 0.1 (0 to 0.3)        | 97 (36 to 205)       | 0.5<br>(0.2 to 1)   |
|             | Male   | 826<br>(496 to 1440)      | 8.9<br>(5.4 to 12.4)   | 221<br>(104 to 338)   | 2.3<br>(1.1 to 3.5) | 122<br>(51 to 257)  | 1.3<br>(0.5 to 2.1) | 84 (40 to 168)        | 0.9<br>(0.4 to 1.4) | 32 (2 to 134)         | 0.3 (0 to 1.4)      | 47 (10 to 95)       | 0.5<br>(0.1 to 1)   | 133<br>(21 to 369)    | 1.5<br>(0.2 to 2.8)  | 9 (1 to 49)            | 0.1 (0 to 0.6)        | 88 (32 to 190)       | 0.8<br>(0.3 to 1.3) |

|             |        |                           |                           |                        |                        |                  |                        |                       |                        |                       |                        |                       |                        |                       |                        |                          |                          |                       |                        |
|-------------|--------|---------------------------|---------------------------|------------------------|------------------------|------------------|------------------------|-----------------------|------------------------|-----------------------|------------------------|-----------------------|------------------------|-----------------------|------------------------|--------------------------|--------------------------|-----------------------|------------------------|
|             |        |                           | to<br>15.3)               | to<br>430)             | to<br>4.5)             |                  | to<br>2.7)             |                       | to<br>1.8)             |                       |                        |                       |                        | to<br>4.2)            |                        |                          |                          | to<br>1.7)            |                        |
|             | Female | 52 (33<br>to 77)          | 0.7<br>(0.4<br>to 1)      | 64 (33<br>to 105)      | 0.8<br>(0.4<br>to 1.2) | 54 (29<br>to 85) | 0.6<br>(0.4<br>to 1)   | 34 (18<br>to 55)      | 0.4<br>(0.2<br>to 0.6) | 11 (1<br>to 38)       | 0.1 (0<br>to 0.5)      | 17 (5<br>to 29)       | 0.2<br>(0.1<br>to 0.3) | 39 (8<br>to 94)       | 0.5<br>(0.1<br>to 1.3) | 2 (1 to<br>5)            | 0 (0<br>to 0.1)          | 9 (3 to<br>18)        | 0.1 (0<br>to 0.2)      |
| Suriname    | Both   | 53 (43<br>to 65)          | 8.9<br>(7.2<br>to 10.9)   | 13 (5<br>to 22)        | 2.1<br>(0.9<br>to 3.7) | 2 (1 to<br>4)    | 0.4<br>(0.1<br>to 0.7) | 5 (3 to<br>7)         | 0.8<br>(0.4<br>to 1.2) | 2 (0 to<br>8)         | 0.4 (0<br>to 1.4)      | 4 (1 to<br>6)         | 0.6<br>(0.2<br>to 1)   | 13 (3<br>to 28)       | 2.3<br>(0.6<br>to 4.8) | 3 (2 to<br>5)            | 0.5<br>(0.3<br>to 0.9)   | 6 (3 to<br>11)        | 1 (0.5<br>to 1.6)      |
|             | Male   | 42 (34<br>to 52)          | 15.6<br>(12.7<br>to 19.3) | 8 (3 to<br>15)         | 3 (1.3<br>to 5.4)      | 1 (0 to<br>3)    | 0.4<br>(0.2<br>to 0.9) | 3 (1 to<br>4)         | 1 (0.5<br>to 1.6)      | 2 (0 to<br>5)         | 0.6 (0<br>to 2)        | 2 (1 to<br>4)         | 0.8<br>(0.2<br>to 1.4) | 9 (2 to<br>20)        | 3.4<br>(0.6<br>to 7.7) | 2 (1 to<br>4)            | 1 (0.5<br>to 1.7)        | 5 (2 to<br>9)         | 1.7<br>(0.7<br>to 2.9) |
|             | Female | 11 (8<br>to 14)           | 3.4<br>(2.6<br>to 4.4)    | 4 (2 to<br>8)          | 1.3<br>(0.5<br>to 2.4) | 1 (0 to<br>2)    | 0.3<br>(0.1<br>to 0.6) | 2 (1 to<br>3)         | 0.6<br>(0.3<br>to 0.9) | 1 (0 to<br>3)         | 0.3 (0<br>to 1)        | 1 (0 to<br>2)         | 0.4<br>(0.1<br>to 0.7) | 5 (1 to<br>11)        | 1.4<br>(0.3<br>to 3.4) | 1 (0 to<br>1)            | 0.2<br>(0.1<br>to 0.4)   | 1 (1 to<br>2)         | 0.4<br>(0.2<br>to 0.7) |
| Sweden      | Both   | 2930<br>(2700<br>to 3150) | 13.4<br>(12.4<br>to 14.3) | 85 (20<br>to 184)      | 0.4<br>(0.1<br>to 0.9) | 0 (0 to<br>1)    | 0 (0<br>to 0)          | 122<br>(72 to<br>184) | 0.6<br>(0.4<br>to 0.9) | 276<br>(36 to<br>726) | 1.3<br>(0.2<br>to 3.4) | 157<br>(39 to<br>238) | 0.7<br>(0.2<br>to 1.1) | 400<br>(97 to<br>862) | 1.8<br>(0.4<br>to 3.8) | 937<br>(664<br>to 1200)  | 3.9<br>(2.7<br>to 5)     | 138<br>(24 to<br>268) | 0.7<br>(0.1<br>to 1.4) |
|             | Male   | 1470<br>(1360<br>to 1580) | 14.1<br>(13 to<br>15.2)   | 42 (10<br>to 91)       | 0.4<br>(0.1<br>to 0.9) | 0 (0 to<br>1)    | 0 (0<br>to 0)          | 76 (45<br>to 118)     | 0.8<br>(0.5<br>to 1.2) | 137<br>(18 to<br>366) | 1.3<br>(0.2<br>to 3.6) | 77 (19<br>to 117)     | 0.7<br>(0.2<br>to 1.1) | 216<br>(36 to<br>492) | 2 (0.3<br>to 4.6)      | 793<br>(538<br>to 1040)  | 7.1<br>(4.8<br>to 9.4)   | 83 (14<br>to 160)     | 0.9<br>(0.1<br>to 1.7) |
|             | Female | 1460<br>(1310<br>to 1600) | 12.9<br>(11.7<br>to 14)   | 43 (10<br>to 93)       | 0.4<br>(0.1<br>to 0.8) | 0 (0 to<br>1)    | 0 (0<br>to 0)          | 45 (26<br>to 68)      | 0.5<br>(0.3<br>to 0.7) | 139<br>(18 to<br>358) | 1.2<br>(0.2<br>to 3.2) | 80 (19<br>to 123)     | 0.7<br>(0.2<br>to 1.1) | 185<br>(38 to<br>431) | 1.5<br>(0.3<br>to 3.6) | 144<br>(81 to<br>217)    | 1.1<br>(0.6<br>to 1.7)   | 56 (8<br>to 112)      | 0.6<br>(0.1<br>to 1.1) |
| Switzerland | Both   | 2720<br>(2460<br>to 2930) | 15.7<br>(14.3<br>to 16.9) | 240<br>(146<br>to 361) | 1.4<br>(0.8<br>to 2.1) | 0 (0 to<br>1)    | 0 (0<br>to 0)          | 136<br>(79 to<br>206) | 0.8<br>(0.5<br>to 1.3) | 262<br>(40 to<br>613) | 1.5<br>(0.2<br>to 3.6) | 137<br>(33 to<br>206) | 0.8<br>(0.2<br>to 1.2) | 354<br>(84 to<br>778) | 2 (0.5<br>to 4.3)      | 1090<br>(781<br>to 1390) | 5.9<br>(4.1<br>to 7.5)   | 151<br>(25 to<br>293) | 1 (0.2<br>to 1.9)      |
|             | Male   | 1780<br>(1610<br>to 1940) | 22.2<br>(20.1<br>to 24.2) | 149<br>(89 to<br>221)  | 1.9<br>(1.1<br>to 2.8) | 0 (0 to<br>0)    | 0 (0<br>to 0)          | 86 (49<br>to 133)     | 1.1<br>(0.6<br>to 1.7) | 162<br>(25 to<br>383) | 2 (0.3<br>to 4.8)      | 84 (20<br>to 127)     | 1.1<br>(0.3<br>to 1.6) | 232<br>(39 to<br>545) | 2.8<br>(0.5<br>to 6.7) | 987<br>(688<br>to 1280)  | 11.9<br>(8.3<br>to 15.4) | 107<br>(16 to<br>209) | 1.4<br>(0.2<br>to 2.7) |
|             | Female | 937<br>(832 to<br>1040)   | 10.3<br>(9.2<br>to 11.4)  | 92 (55<br>to 136)      | 1 (0.6<br>to 1.5)      | 0 (0 to<br>0)    | 0 (0<br>to 0)          | 50 (29<br>to 77)      | 0.6<br>(0.3<br>to 0.9) | 100<br>(15 to<br>232) | 1.1<br>(0.2<br>to 2.5) | 53 (13<br>to 82)      | 0.6<br>(0.1<br>to 0.9) | 122<br>(23 to<br>285) | 1.3<br>(0.2<br>to 2.9) | 102<br>(55 to<br>154)    | 1 (0.5<br>to 1.5)        | 45 (7<br>to 90)       | 0.6<br>(0.1<br>to 1.1) |

|                               |        |                          |                        |                        |                     |                      |                     |                      |                     |                     |                     |                     |                     |                       |                     |                      |                     |                       |                     |
|-------------------------------|--------|--------------------------|------------------------|------------------------|---------------------|----------------------|---------------------|----------------------|---------------------|---------------------|---------------------|---------------------|---------------------|-----------------------|---------------------|----------------------|---------------------|-----------------------|---------------------|
| Syria                         | Both   | 865<br>(628 to 1140)     | 7.3<br>(5.4 to 9.5)    | 274<br>(180 to 410)    | 2.3<br>(1.6 to 3.4) | 0 (0 to 1)           | 0 (0 to 0)          | 93 (51 to 151)       | 0.8<br>(0.4 to 1.2) | 46 (7 to 123)       | 0.4<br>(0.1 to 1)   | 42 (10 to 71)       | 0.4<br>(0.1 to 0.6) | 146<br>(32 to 334)    | 1.3<br>(0.3 to 3)   | 14 (6 to 29)         | 0.2<br>(0.1 to 0.3) | 87 (37 to 161)        | 0.6<br>(0.3 to 1.1) |
|                               | Male   | 786<br>(568 to 1040)     | 12.7<br>(9.3 to 16.5)  | 202<br>(131 to 299)    | 3.2<br>(2.1 to 4.7) | 0 (0 to 1)           | 0 (0 to 0)          | 62 (33 to 100)       | 1 (0.5 to 1.6)      | 34 (5 to 90)        | 0.5<br>(0.1 to 1.4) | 30 (7 to 52)        | 0.5<br>(0.1 to 0.8) | 108<br>(18 to 262)    | 1.8<br>(0.3 to 4.4) | 13 (6 to 27)         | 0.3<br>(0.1 to 0.5) | 84 (36 to 156)        | 1.1<br>(0.5 to 2.1) |
|                               | Female | 79 (51 to 112)           | 1.5 (1 to 2)           | 73 (46 to 109)         | 1.4<br>(0.9 to 2)   | 0 (0 to 0)           | 0 (0 to 0)          | 32 (17 to 51)        | 0.5<br>(0.3 to 0.8) | 12 (2 to 33)        | 0.2 (0 to 0.6)      | 12 (3 to 20)        | 0.2<br>(0.1 to 0.4) | 38 (8 to 89)          | 0.8<br>(0.2 to 1.8) | 1 (0 to 2)           | 0 (0 to 0.1)        | 3 (1 to 6)            | 0 (0 to 0.1)        |
| Taiwan<br>(Province of China) | Both   | 6430<br>(5050 to 8210)   | 16.1<br>(12.6 to 20.6) | 1940<br>(1340 to 2760) | 4.9<br>(3.4 to 6.9) | 82 (18 to 227)       | 0.2 (0 to 0.6)      | 795<br>(448 to 1250) | 2 (1.1 to 3.2)      | 125<br>(23 to 344)  | 0.3<br>(0.1 to 0.9) | 284<br>(67 to 466)  | 0.7<br>(0.2 to 1.2) | 1100<br>(253 to 2490) | 2.8<br>(0.6 to 6.2) | 487<br>(243 to 869)  | 1.2<br>(0.6 to 2.2) | 667<br>(317 to 1130)  | 1.6<br>(0.8 to 2.8) |
|                               | Male   | 5840<br>(4580 to 7510)   | 31.8<br>(25 to 40.8)   | 1220<br>(836 to 1720)  | 6.7<br>(4.6 to 9.4) | 43 (9 to 119)        | 0.2 (0 to 0.7)      | 421<br>(232 to 690)  | 2.3<br>(1.3 to 3.8) | 78 (14 to 217)      | 0.4<br>(0.1 to 1.2) | 168<br>(37 to 279)  | 0.9<br>(0.2 to 1.5) | 690<br>(117 to 1660)  | 3.8<br>(0.6 to 9.1) | 370<br>(173 to 673)  | 2.1 (1 to 3.8)      | 443<br>(195 to 775)   | 2.3 (1 to 4)        |
|                               | Female | 596<br>(425 to 821)      | 2.8 (2 to 3.9)         | 727<br>(495 to 1030)   | 3.4<br>(2.3 to 4.8) | 39 (9 to 110)        | 0.2 (0 to 0.5)      | 374<br>(213 to 594)  | 1.8 (1 to 2.8)      | 47 (8 to 128)       | 0.2 (0 to 0.6)      | 116<br>(25 to 198)  | 0.5<br>(0.1 to 0.9) | 410<br>(80 to 967)    | 1.9<br>(0.4 to 4.4) | 117<br>(37 to 276)   | 0.5<br>(0.2 to 1.3) | 224<br>(100 to 393)   | 1.1<br>(0.5 to 1.8) |
| Tajikistan                    | Both   | 306<br>(242 to 392)      | 6.7<br>(5.4 to 8.5)    | 98 (49 to 159)         | 2.1<br>(1.1 to 3.4) | 49 (24 to 84)        | 1.1<br>(0.5 to 1.8) | 33 (19 to 51)        | 0.7<br>(0.4 to 1.1) | 34 (3 to 116)       | 0.7<br>(0.1 to 2.5) | 30 (10 to 50)       | 0.7<br>(0.2 to 1.1) | 45 (10 to 106)        | 1.1<br>(0.2 to 2.5) | 13 (6 to 23)         | 0.3<br>(0.2 to 0.6) | 29 (13 to 50)         | 0.4<br>(0.2 to 0.8) |
|                               | Male   | 288<br>(226 to 370)      | 13.6<br>(10.9 to 17.2) | 71 (36 to 114)         | 3.3<br>(1.7 to 5.2) | 31 (15 to 56)        | 1.5<br>(0.7 to 2.6) | 21 (12 to 34)        | 1 (0.6 to 1.6)      | 24 (2 to 83)        | 1.1<br>(0.1 to 3.8) | 21 (7 to 35)        | 1 (0.3 to 1.6)      | 32 (5 to 78)          | 1.6<br>(0.3 to 3.9) | 10 (5 to 20)         | 0.6<br>(0.3 to 1.1) | 24 (11 to 43)         | 0.8<br>(0.3 to 1.4) |
|                               | Female | 18 (13 to 26)            | 0.7<br>(0.5 to 1)      | 27 (12 to 46)          | 1.1<br>(0.5 to 1.8) | 18 (9 to 30)         | 0.7<br>(0.4 to 1.2) | 11 (7 to 18)         | 0.4<br>(0.2 to 0.6) | 10 (1 to 36)        | 0.4 (0 to 1.4)      | 9 (3 to 15)         | 0.4<br>(0.1 to 0.6) | 13 (3 to 32)          | 0.6<br>(0.1 to 1.4) | 2 (1 to 4)           | 0.1 (0 to 0.2)      | 5 (2 to 9)            | 0.1<br>(0.1 to 0.3) |
| Thailand                      | Both   | 12500<br>(9320 to 16400) | 12.4<br>(9.2 to 16.2)  | 3870<br>(2570 to 5630) | 3.8<br>(2.6 to 5.6) | 868<br>(324 to 1830) | 0.9<br>(0.3 to 1.8) | 978<br>(513 to 1660) | 1 (0.5 to 1.6)      | 397<br>(46 to 1110) | 0.4 (0 to 1.1)      | 579<br>(138 to 948) | 0.6<br>(0.1 to 0.9) | 2040<br>(450 to 4830) | 2.1<br>(0.5 to 4.8) | 835<br>(379 to 1540) | 0.9<br>(0.4 to 1.6) | 1260<br>(575 to 2180) | 1.2<br>(0.5 to 2)   |
|                               | Male   | 11000<br>(8100)          | 24.3<br>(18.1)         | 2550<br>(1680)         | 5.6<br>(3.7)        | 487<br>(170)         | 1.1<br>(0.4)        | 488<br>(251)         | 1.1<br>(0.6)        | 257<br>(30 to 718)  | 0.6<br>(0.1)        | 361<br>(82 to 618)  | 0.8<br>(0.2)        | 1330<br>(220)         | 3 (0.5 to 7.5)      | 801<br>(354)         | 2 (0.9 to 3.6)      | 856<br>(363)          | 1.7<br>(0.7 to 3)   |

|                 |        |                              |                              |                             |                           |                           |                           |                           |                           |                       |                           |                       |                           |                            |                           |                     |                           |                           |                           |
|-----------------|--------|------------------------------|------------------------------|-----------------------------|---------------------------|---------------------------|---------------------------|---------------------------|---------------------------|-----------------------|---------------------------|-----------------------|---------------------------|----------------------------|---------------------------|---------------------|---------------------------|---------------------------|---------------------------|
|                 |        | to<br>14400)                 | to<br>31.8)                  | to<br>3720)                 | to<br>8.2)                | to<br>1060)               | to<br>2.4)                | to<br>851)                | to<br>1.9)                |                       | to<br>1.6)                |                       | to<br>1.4)                | to<br>3280)                |                           | to<br>1490)         |                           | to<br>1540)               |                           |
|                 | Female | 1580<br>(1140<br>to<br>2080) | 2.8<br>(2.1<br>to<br>3.7)    | 1320<br>(862<br>to<br>1910) | 2.4<br>(1.6<br>to<br>3.4) | 382<br>(150<br>to<br>779) | 0.7<br>(0.3<br>to<br>1.4) | 490<br>(257<br>to<br>819) | 0.9<br>(0.5<br>to<br>1.5) | 140<br>(16 to<br>397) | 0.3 (0<br>to<br>0.7)      | 219<br>(52 to<br>364) | 0.4<br>(0.1<br>to<br>0.7) | 716<br>(141<br>to<br>1720) | 1.3<br>(0.3<br>to<br>3.1) | 33 (10<br>to<br>79) | 0.1 (0<br>to<br>0.1)      | 404<br>(168<br>to<br>731) | 0.7<br>(0.3<br>to<br>1.3) |
| Timor-<br>Leste | Both   | 93 (62<br>to 122)            | 11.9<br>(8.1<br>to<br>15.5)  | 9 (4 to<br>17)              | 1.1<br>(0.5<br>to<br>2.1) | 40 (24<br>to 58)          | 5 (3.1<br>to<br>7.4)      | 7 (3 to<br>12)            | 0.9<br>(0.4<br>to<br>1.5) | 4 (0 to<br>13)        | 0.4 (0<br>to<br>1.7)      | 10 (3<br>to 18)       | 1.3<br>(0.4<br>to<br>2.2) | 15 (3<br>to 34)            | 2 (0.4<br>to<br>4.6)      | 4 (2 to<br>8)       | 0.7<br>(0.3<br>to<br>1.2) | 10 (4<br>to 18)           | 1.1<br>(0.4<br>to 2)      |
|                 | Male   | 87 (58<br>to 114)            | 22.6<br>(14.8<br>to<br>29.4) | 7 (3 to<br>13)              | 1.8<br>(0.7<br>to<br>3.4) | 27 (16<br>to 41)          | 7 (4.1<br>to<br>10.5)     | 4 (2 to<br>7)             | 1.1<br>(0.5<br>to<br>1.9) | 3 (0 to<br>10)        | 0.7<br>(0.1<br>to<br>2.4) | 7 (2 to<br>12)        | 1.9<br>(0.6<br>to<br>3.2) | 11 (2<br>to 26)            | 3 (0.5<br>to 7)           | 4 (2 to<br>7)       | 1.2<br>(0.5<br>to<br>2.3) | 7 (3 to<br>14)            | 1.6<br>(0.6<br>to 3)      |
|                 | Female | 6 (3 to<br>9)                | 1.5<br>(0.9<br>to<br>2.4)    | 2 (1 to<br>4)               | 0.5<br>(0.2<br>to 1)      | 12 (8<br>to 19)           | 3.1<br>(1.9<br>to<br>4.7) | 3 (1 to<br>5)             | 0.7<br>(0.3<br>to<br>1.3) | 1 (0 to<br>4)         | 0.3 (0<br>to<br>0.9)      | 3 (1 to<br>5)         | 0.7<br>(0.3<br>to<br>1.3) | 4 (1 to<br>9)              | 1 (0.2<br>to<br>2.5)      | 0 (0 to<br>1)       | 0.1 (0<br>to<br>0.3)      | 3 (1 to<br>5)             | 0.6<br>(0.2<br>to<br>1.1) |
| Togo            | Both   | 176<br>(125 to<br>241)       | 5.4<br>(3.9<br>to<br>7.3)    | 37 (17<br>to 67)            | 1.1<br>(0.5<br>to 2)      | 100<br>(62 to<br>150)     | 3 (1.9<br>to<br>4.5)      | 13 (7<br>to 22)           | 0.4<br>(0.2<br>to<br>0.6) | 18 (1<br>to 67)       | 0.5 (0<br>to 2)           | 26 (9<br>to 44)       | 0.8<br>(0.3<br>to<br>1.3) | 20 (4<br>to 48)            | 0.7<br>(0.1<br>to<br>1.6) | 10 (5<br>to 21)     | 0.4<br>(0.2<br>to<br>0.7) | 18 (8<br>to 34)           | 0.4<br>(0.2<br>to<br>0.8) |
|                 | Male   | 156<br>(109 to<br>215)       | 12<br>(8.6<br>to<br>16.2)    | 28 (12<br>to 51)            | 2 (0.9<br>to<br>3.7)      | 67 (39<br>to 108)         | 4.9<br>(2.9<br>to<br>7.8) | 9 (4 to<br>15)            | 0.6<br>(0.3<br>to 1)      | 13 (1<br>to 46)       | 0.9<br>(0.1<br>to<br>3.4) | 18 (6<br>to 31)       | 1.3<br>(0.5<br>to<br>2.3) | 14 (2<br>to 37)            | 1.3<br>(0.2<br>to<br>3.1) | 9 (4 to<br>19)      | 0.8<br>(0.4<br>to<br>1.6) | 14 (5<br>to 26)           | 0.7<br>(0.3<br>to<br>1.3) |
|                 | Female | 20 (13<br>to 28)             | 1.1<br>(0.8<br>to<br>1.6)    | 9 (4 to<br>16)              | 0.5<br>(0.2<br>to<br>0.8) | 33 (21<br>to 47)          | 1.7<br>(1.1<br>to<br>2.4) | 4 (2 to<br>7)             | 0.2<br>(0.1<br>to<br>0.3) | 6 (0 to<br>20)        | 0.3 (0<br>to 1)           | 8 (3 to<br>13)        | 0.4<br>(0.1<br>to<br>0.7) | 6 (1 to<br>15)             | 0.3<br>(0.1<br>to<br>0.8) | 1 (0 to<br>3)       | 0.1 (0<br>to<br>0.2)      | 5 (2 to<br>9)             | 0.2<br>(0.1<br>to<br>0.4) |
| Tokelau         | Both   | 0 (0 to<br>0)                | 14.2<br>(10.9<br>to<br>18.7) | 0 (0 to<br>0)               | 0.8 (0<br>to<br>2.3)      | 0 (0 to<br>0)             | 0 (0 to<br>0)             | 0 (0 to<br>0)             | 1.7<br>(0.9<br>to<br>2.7) | 0 (0 to<br>0)         | 1.7<br>(0.1<br>to<br>5.8) | 0 (0 to<br>0)         | 1.1<br>(0.3<br>to<br>1.9) | 0 (0 to<br>0)              | 3.6<br>(0.9<br>to 8)      | 0 (0 to<br>0)       | 1.3<br>(0.7<br>to<br>2.3) | 0 (0 to<br>0)             | 1 (0.4<br>to<br>1.8)      |
|                 | Male   | 0 (0 to<br>0)                | 22<br>(16.5<br>to<br>30.1)   | 0 (0 to<br>0)               | 1 (0<br>to 3)             | 0 (0 to<br>0)             | 0 (0 to<br>0)             | 0 (0 to<br>0)             | 1.9 (1<br>to<br>3.3)      | 0 (0 to<br>0)         | 2.2<br>(0.1<br>to 7)      | 0 (0 to<br>0)         | 1.5<br>(0.4<br>to<br>2.6) | 0 (0 to<br>0)              | 4.6<br>(0.8<br>to 11)     | 0 (0 to<br>0)       | 2.3<br>(1.2<br>to<br>4.3) | 0 (0 to<br>0)             | 1.3<br>(0.5<br>to<br>2.5) |
|                 | Female | 0 (0 to<br>0)                | 6.6<br>(4.1<br>to<br>9.8)    | 0 (0 to<br>0)               | 0.6 (0<br>to<br>1.7)      | 0 (0 to<br>0)             | 0 (0 to<br>0)             | 0 (0 to<br>0)             | 1.4<br>(0.7<br>to<br>2.5) | 0 (0 to<br>0)         | 1.2<br>(0.1<br>to 4.2)    | 0 (0 to<br>0)         | 0.8<br>(0.2<br>to<br>1.5) | 0 (0 to<br>0)              | 2.7<br>(0.6<br>to<br>6.8) | 0 (0 to<br>0)       | 0.3<br>(0.1<br>to<br>0.6) | 0 (0 to<br>0)             | 0.6<br>(0.2<br>to<br>1.2) |

|                     |        |                        |                     |                     |                   |              |                  |                     |                  |                    |                  |                 |                  |                    |                   |                     |                  |                    |                  |
|---------------------|--------|------------------------|---------------------|---------------------|-------------------|--------------|------------------|---------------------|------------------|--------------------|------------------|-----------------|------------------|--------------------|-------------------|---------------------|------------------|--------------------|------------------|
| Tonga               | Both   | 15 (12 to 18)          | 19.4 (16 to 23.2)   | 1 (0 to 3)          | 1.8 (0.6 to 4.2)  | 2 (1 to 3)   | 2.5 (1.2 to 4.3) | 1 (1 to 2)          | 1.8 (1 to 2.9)   | 1 (0 to 3)         | 1 (0 to 3.9)     | 1 (0 to 2)      | 1.4 (0.4 to 2.2) | 3 (1 to 7)         | 4.2 (0.9 to 9.2)  | 1 (1 to 2)          | 1.7 (0.9 to 2.8) | 1 (0 to 1)         | 0.8 (0.4 to 1.5) |
|                     | Male   | 13 (11 to 16)          | 38.3 (31.3 to 46)   | 1 (0 to 3)          | 3.2 (1 to 7.4)    | 1 (1 to 2)   | 4 (1.7 to 7.1)   | 1 (1 to 2)          | 2.8 (1.5 to 4.6) | 1 (0 to 2)         | 1.6 (0.1 to 6.6) | 1 (0 to 1)      | 2.3 (0.7 to 3.8) | 2 (0 to 6)         | 7.2 (1.4 to 16.3) | 1 (1 to 2)          | 4 (2.2 to 6.5)   | 0 (0 to 1)         | 1.3 (0.5 to 2.3) |
|                     | Female | 2 (1 to 2)             | 4.2 (3.1 to 5.7)    | 0 (0 to 1)          | 0.7 (0.2 to 1.7)  | 1 (0 to 1)   | 1.4 (0.7 to 2.3) | 0 (0 to 1)          | 1 (0.5 to 1.6)   | 0 (0 to 1)         | 0.4 (0 to 1.7)   | 0 (0 to 0)      | 0.6 (0.2 to 1)   | 1 (0 to 2)         | 1.8 (0.4 to 4.2)  | 0 (0 to 0)          | 0.1 (0.1 to 0.3) | 0 (0 to 0)         | 0.5 (0.2 to 0.9) |
| Trinidad and Tobago | Both   | 100 (74 to 131)        | 5.3 (4 to 6.9)      | 28 (10 to 53)       | 1.5 (0.5 to 2.9)  | 0 (0 to 0)   | 0 (0 to 0)       | 7 (4 to 12)         | 0.4 (0.2 to 0.7) | 5 (0 to 19)        | 0.3 (0 to 1)     | 9 (3 to 16)     | 0.5 (0.2 to 0.8) | 31 (7 to 69)       | 1.6 (0.4 to 3.7)  | 6 (3 to 12)         | 0.4 (0.2 to 0.6) | 15 (7 to 26)       | 0.7 (0.3 to 1.3) |
|                     | Male   | 87 (64 to 114)         | 9.7 (7.1 to 12.6)   | 21 (7 to 40)        | 2.3 (0.8 to 4.5)  | 0 (0 to 0)   | 0 (0 to 0)       | 5 (2 to 9)          | 0.6 (0.3 to 0.9) | 4 (0 to 15)        | 0.4 (0 to 1.6)   | 7 (2 to 12)     | 0.8 (0.2 to 1.3) | 23 (4 to 54)       | 2.6 (0.5 to 6)    | 6 (3 to 11)         | 0.7 (0.3 to 1.3) | 12 (5 to 22)       | 1.3 (0.5 to 2.3) |
|                     | Female | 13 (9 to 18)           | 1.3 (0.9 to 1.9)    | 7 (3 to 14)         | 0.8 (0.3 to 1.4)  | 0 (0 to 0)   | 0 (0 to 0)       | 2 (1 to 4)          | 0.2 (0.1 to 0.4) | 1 (0 to 5)         | 0.1 (0 to 0.5)   | 2 (1 to 4)      | 0.3 (0.1 to 0.4) | 7 (2 to 18)        | 0.8 (0.2 to 1.8)  | 1 (0 to 1)          | 0.1 (0 to 0.1)   | 2 (1 to 4)         | 0.2 (0.1 to 0.4) |
| Tunisia             | Both   | 1900 (1330 to 2640)    | 15.2 (10.7 to 21.1) | 500 (308 to 761)    | 4 (2.5 to 6.1)    | 1 (0 to 3)   | 0 (0 to 0)       | 183 (94 to 301)     | 1.5 (0.8 to 2.4) | 124 (16 to 327)    | 1 (0.1 to 2.6)   | 60 (13 to 107)  | 0.5 (0.1 to 0.9) | 359 (67 to 864)    | 2.9 (0.6 to 7)    | 22 (3 to 106)       | 0.2 (0 to 0.9)   | 156 (64 to 289)    | 1.1 (0.5 to 2.1) |
|                     | Male   | 1860 (1300 to 2590)    | 30.8 (21.8 to 42.8) | 449 (273 to 692)    | 7.4 (4.5 to 11.4) | 1 (0 to 3)   | 0 (0 to 0)       | 157 (80 to 261)     | 2.6 (1.3 to 4.3) | 111 (15 to 298)    | 1.8 (0.2 to 4.9) | 53 (11 to 97)   | 0.9 (0.2 to 1.6) | 329 (58 to 803)    | 5.6 (1 to 13.4)   | 20 (2 to 104)       | 0.4 (0 to 2.1)   | 152 (62 to 284)    | 2.2 (0.9 to 4.1) |
|                     | Female | 41 (27 to 58)          | 0.6 (0.4 to 0.9)    | 51 (32 to 76)       | 0.8 (0.5 to 1.2)  | 0 (0 to 0)   | 0 (0 to 0)       | 25 (13 to 41)       | 0.4 (0.2 to 0.6) | 13 (2 to 32)       | 0.2 (0 to 0.5)   | 7 (2 to 11)     | 0.1 (0 to 0.2)   | 30 (6 to 73)       | 0.5 (0.1 to 1.2)  | 1 (0 to 3)          | 0 (0 to 0.1)     | 4 (1 to 7)         | 0.1 (0 to 0.1)   |
| Turkey              | Both   | 22200 (17500 to 27700) | 25 (19.8 to 31.2)   | 5300 (3660 to 7370) | 6 (4.2 to 8.4)    | 27 (8 to 67) | 0 (0 to 0.1)     | 1820 (1060 to 2910) | 2.1 (1.2 to 3.3) | 1050 (154 to 2650) | 1.2 (0.2 to 3)   | 184 (72 to 338) | 0.2 (0.1 to 0.4) | 2720 (572 to 6270) | 3.1 (0.7 to 7.2)  | 5330 (2950 to 8460) | 6.2 (3.5 to 9.8) | 1730 (772 to 2970) | 1.8 (0.8 to 3.1) |
|                     | Male   | 20300 (16000)          | 48.8 (38.6)         | 4410 (3010)         | 10.6 (7.3)        | 20 (6 to 52) | 0 (0 to 0.1)     | 1400 (806)          | 3.4 (1.9)        | 871 (129)          | 2.1 (0.3)        | 143 (58 to 279) | 0.3 (0.1)        | 2270 (384)         | 5.6 (1 to 13.3)   | 4940 (2630)         | 12.5 (6.8)       | 1620 (710)         | 3.5 (1.5)        |

|              |        |                              |                              |                            |                           |                           |                           |                           |                           |                       |                           |                  |                           |                        |                           |                           |                           |                       |                           |
|--------------|--------|------------------------------|------------------------------|----------------------------|---------------------------|---------------------------|---------------------------|---------------------------|---------------------------|-----------------------|---------------------------|------------------|---------------------------|------------------------|---------------------------|---------------------------|---------------------------|-----------------------|---------------------------|
|              |        | to<br>25400)                 | to<br>60.9)                  | to<br>6150)                | to<br>14.8)               |                           |                           | to<br>2250)               | to<br>5.4)                | to<br>2200)           | to<br>5.3)                |                  | to<br>0.7)                | to<br>5410)            |                           | to<br>7880)               | to<br>19.9)               | to<br>2800)           | to<br>6.1)                |
|              | Female | 1910<br>(1480<br>to<br>2400) | 4.1<br>(3.2<br>to<br>5.1)    | 894<br>(606<br>to<br>1250) | 1.9<br>(1.3<br>to<br>2.7) | 6 (2 to<br>16)            | 0 (0<br>to 0)             | 420<br>(250<br>to<br>663) | 0.9<br>(0.5<br>to<br>1.4) | 178<br>(25 to<br>452) | 0.4<br>(0.1<br>to 1)      | 41 (13<br>to 74) | 0.1 (0<br>to<br>0.2)      | 455<br>(89 to<br>1090) | 1 (0.2<br>to<br>2.4)      | 387<br>(194<br>to<br>664) | 0.9<br>(0.4<br>to<br>1.5) | 112<br>(47 to<br>198) | 0.2<br>(0.1<br>to<br>0.4) |
| Turkmenistan | Both   | 240<br>(187 to<br>304)       | 5.9<br>(4.6<br>to<br>7.3)    | 68 (38<br>to<br>106)       | 1.7<br>(0.9<br>to<br>2.6) | 0 (0 to<br>0)             | 0 (0<br>to 0)             | 36 (21<br>to 55)          | 0.9<br>(0.5<br>to<br>1.4) | 21 (2<br>to 77)       | 0.5 (0<br>to<br>1.9)      | 14 (3<br>to 22)  | 0.3<br>(0.1<br>to<br>0.5) | 26 (5<br>to 61)        | 0.7<br>(0.1<br>to<br>1.6) | 9 (4 to<br>18)            | 0.2<br>(0.1<br>to<br>0.5) | 24 (11<br>to 41)      | 0.5<br>(0.2<br>to<br>0.9) |
|              | Male   | 223<br>(173 to<br>282)       | 12.5<br>(9.8<br>to<br>15.7)  | 51 (29<br>to 81)           | 2.8<br>(1.6<br>to<br>4.4) | 0 (0 to<br>0)             | 0 (0<br>to 0)             | 24 (14<br>to 37)          | 1.4<br>(0.8<br>to<br>2.1) | 16 (1<br>to 57)       | 0.9<br>(0.1<br>to<br>3.2) | 10 (2<br>to 17)  | 0.6<br>(0.1<br>to<br>0.9) | 19 (3<br>to 47)        | 1.2<br>(0.2<br>to<br>2.8) | 6 (3 to<br>13)            | 0.4<br>(0.2<br>to<br>0.8) | 20 (9<br>to 36)       | 0.9<br>(0.4<br>to<br>1.6) |
|              | Female | 17 (12<br>to 24)             | 0.7<br>(0.5<br>to 1)         | 17 (9<br>to 26)            | 0.8<br>(0.4<br>to<br>1.2) | 0 (0 to<br>0)             | 0 (0<br>to 0)             | 12 (7<br>to 18)           | 0.5<br>(0.3<br>to<br>0.8) | 5 (0 to<br>19)        | 0.2 (0<br>to<br>0.9)      | 3 (1 to<br>6)    | 0.2 (0<br>to<br>0.3)      | 6 (1 to<br>16)         | 0.3<br>(0.1<br>to<br>0.8) | 2 (1 to<br>7)             | 0.1 (0<br>to<br>0.3)      | 3 (1 to<br>6)         | 0.1<br>(0.1<br>to<br>0.2) |
| Tuvalu       | Both   | 2 (1 to<br>2)                | 16.2<br>(12.1<br>to<br>22.1) | 0 (0 to<br>0)              | 0.8<br>(0.3<br>to<br>1.9) | 0 (0 to<br>0)             | 0.6<br>(0.2<br>to<br>1.4) | 0 (0 to<br>0)             | 1.6<br>(0.8<br>to<br>2.7) | 0 (0 to<br>0)         | 0.9<br>(0.1<br>to<br>3.6) | 0 (0 to<br>0)    | 1.4<br>(0.4<br>to<br>2.3) | 0 (0 to<br>1)          | 3.9<br>(0.9<br>to<br>8.8) | 0 (0 to<br>0)             | 1.8<br>(0.9<br>to<br>3.4) | 0 (0 to<br>0)         | 1.2<br>(0.5<br>to<br>2.1) |
|              | Male   | 1 (1 to<br>2)                | 28<br>(20.7<br>to<br>39.7)   | 0 (0 to<br>0)              | 1.3<br>(0.4<br>to 3)      | 0 (0 to<br>0)             | 0.8<br>(0.2<br>to 2)      | 0 (0 to<br>0)             | 2.2<br>(1.1<br>to<br>3.9) | 0 (0 to<br>0)         | 1.4<br>(0.1<br>to<br>5.5) | 0 (0 to<br>0)    | 2 (0.6<br>to<br>3.5)      | 0 (0 to<br>1)          | 5.8 (1<br>to<br>13.7)     | 0 (0 to<br>0)             | 3.8<br>(1.9<br>to<br>7.1) | 0 (0 to<br>0)         | 2 (0.8<br>to<br>3.7)      |
|              | Female | 0 (0 to<br>0)                | 6.3<br>(4.2<br>to<br>8.9)    | 0 (0 to<br>0)              | 0.5<br>(0.2<br>to<br>1.1) | 0 (0 to<br>0)             | 0.5<br>(0.1<br>to 1)      | 0 (0 to<br>0)             | 1.1<br>(0.6<br>to<br>1.9) | 0 (0 to<br>0)         | 0.5 (0<br>to<br>2.1)      | 0 (0 to<br>0)    | 0.8<br>(0.3<br>to<br>1.4) | 0 (0 to<br>0)          | 2.4<br>(0.5<br>to<br>5.7) | 0 (0 to<br>0)             | 0.3<br>(0.1<br>to<br>0.6) | 0 (0 to<br>0)         | 0.4<br>(0.2<br>to<br>0.8) |
| Uganda       | Both   | 275<br>(211 to<br>345)       | 2.2<br>(1.7<br>to<br>2.8)    | 66 (30<br>to<br>113)       | 0.5<br>(0.2<br>to<br>0.9) | 295<br>(198<br>to<br>406) | 2.2<br>(1.5<br>to<br>3.1) | 19 (9<br>to 31)           | 0.1<br>(0.1<br>to<br>0.2) | 42 (3<br>to<br>160)   | 0.3 (0<br>to<br>1.2)      | 15 (4<br>to 26)  | 0.1 (0<br>to<br>0.2)      | 73 (16<br>to<br>166)   | 0.6<br>(0.1<br>to<br>1.4) | 38 (13<br>to<br>148)      | 0.3<br>(0.1<br>to<br>1.3) | 56 (26<br>to 97)      | 0.3<br>(0.2<br>to<br>0.6) |
|              | Male   | 232<br>(180 to<br>290)       | 4.4<br>(3.4<br>to<br>5.4)    | 46 (20<br>to 80)           | 0.8<br>(0.4<br>to<br>1.5) | 177<br>(116<br>to<br>247) | 3.2<br>(2.1<br>to<br>4.4) | 11 (5<br>to 19)           | 0.2<br>(0.1<br>to<br>0.3) | 26 (2<br>to<br>101)   | 0.5 (0<br>to<br>1.8)      | 9 (2 to<br>16)   | 0.2 (0<br>to<br>0.3)      | 50 (8<br>to<br>119)    | 1 (0.2<br>to<br>2.4)      | 25 (6<br>to<br>130)       | 0.6<br>(0.1<br>to<br>2.9) | 37 (15<br>to 67)      | 0.5<br>(0.2<br>to<br>0.9) |
|              | Female | 43 (28<br>to 60)             | 0.6<br>(0.4<br>to<br>0.9)    | 20 (9<br>to 38)            | 0.3<br>(0.1<br>to<br>0.5) | 118<br>(76 to<br>169)     | 1.6 (1<br>to<br>2.2)      | 8 (4 to<br>13)            | 0.1 (0<br>to<br>0.2)      | 16 (1<br>to 60)       | 0.2 (0<br>to<br>0.8)      | 6 (1 to<br>11)   | 0.1 (0<br>to<br>0.1)      | 23 (4<br>to 57)        | 0.3<br>(0.1<br>to<br>0.8) | 13 (4<br>to 25)           | 0.2<br>(0.1<br>to<br>0.4) | 20 (8<br>to 37)       | 0.2<br>(0.1<br>to<br>0.4) |



|                      |        |                           |                        |                        |                     |                      |                     |                       |                     |                       |                     |                       |                     |                         |                      |                           |                        |                       |                     |
|----------------------|--------|---------------------------|------------------------|------------------------|---------------------|----------------------|---------------------|-----------------------|---------------------|-----------------------|---------------------|-----------------------|---------------------|-------------------------|----------------------|---------------------------|------------------------|-----------------------|---------------------|
| Ukraine              | Both   | 12300<br>(9900 to 14800)  | 16.3<br>(13.1 to 19.7) | 1720<br>(957 to 2660)  | 2.3<br>(1.3 to 3.6) | 94 (26 to 237)       | 0.1 (0 to 0.3)      | 730<br>(422 to 1150)  | 1 (0.6 to 1.6)      | 1000<br>(88 to 3070)  | 1.3<br>(0.1 to 4.1) | 880<br>(297 to 1390)  | 1.2<br>(0.4 to 1.9) | 885<br>(175 to 2130)    | 1.2<br>(0.2 to 2.8)  | 1120<br>(638 to 1740)     | 1.4<br>(0.8 to 2.2)    | 515<br>(89 to 1030)   | 0.7<br>(0.1 to 1.4) |
|                      | Male   | 11600<br>(9200 to 14000)  | 39.2<br>(31.2 to 47.4) | 1430<br>(782 to 2230)  | 4.9<br>(2.7 to 7.6) | 73 (19 to 189)       | 0.2<br>(0.1 to 0.6) | 520<br>(292 to 839)   | 1.8 (1 to 2.8)      | 835<br>(74 to 2550)   | 2.8<br>(0.3 to 8.6) | 731<br>(250 to 1170)  | 2.5<br>(0.9 to 3.9) | 746<br>(128 to 1860)    | 2.5<br>(0.4 to 6.2)  | 991<br>(534 to 1600)      | 3.4<br>(1.8 to 5.4)    | 442<br>(73 to 887)    | 1.4<br>(0.2 to 2.9) |
|                      | Female | 719<br>(546 to 940)       | 1.6<br>(1.2 to 2.1)    | 283<br>(158 to 442)    | 0.6<br>(0.3 to 1)   | 22 (6 to 52)         | 0 (0 to 0.1)        | 210<br>(119 to 325)   | 0.5<br>(0.3 to 0.7) | 167<br>(14 to 500)    | 0.4 (0 to 1.1)      | 150<br>(47 to 243)    | 0.3<br>(0.1 to 0.5) | 139<br>(24 to 349)      | 0.3<br>(0.1 to 0.7)  | 130<br>(48 to 281)        | 0.3<br>(0.1 to 0.6)    | 73 (11 to 152)        | 0.2 (0 to 0.4)      |
| United Arab Emirates | Both   | 275<br>(197 to 372)       | 11.5<br>(8.3 to 15.9)  | 129<br>(81 to 190)     | 5 (3.1 to 7.6)      | 0 (0 to 0)           | 0 (0 to 0)          | 45 (25 to 72)         | 1.8 (1 to 2.9)      | 15 (1 to 53)          | 0.6 (0 to 2)        | 13 (3 to 22)          | 0.5<br>(0.1 to 0.8) | 73 (17 to 167)          | 3.9<br>(0.9 to 8.9)  | 3 (0 to 16)               | 0.3 (0 to 1)           | 52 (22 to 97)         | 1 (0.4 to 1.9)      |
|                      | Male   | 256<br>(182 to 348)       | 15.4<br>(11.2 to 21.4) | 104<br>(65 to 156)     | 5.9<br>(3.7 to 8.8) | 0 (0 to 0)           | 0 (0 to 0)          | 34 (19 to 56)         | 2 (1.1 to 3.4)      | 12 (1 to 43)          | 0.7<br>(0.1 to 2.4) | 10 (2 to 18)          | 0.5<br>(0.1 to 1)   | 60 (11 to 139)          | 4.5<br>(0.9 to 10.3) | 3 (0 to 15)               | 0.3 (0 to 1.4)         | 49 (20 to 92)         | 1.3<br>(0.5 to 2.5) |
|                      | Female | 19 (11 to 29)             | 2.8<br>(1.5 to 4.7)    | 25 (15 to 37)          | 3.3<br>(1.7 to 5.6) | 0 (0 to 0)           | 0 (0 to 0)          | 11 (6 to 18)          | 1.3<br>(0.6 to 2.3) | 3 (0 to 11)           | 0.4 (0 to 1.5)      | 3 (1 to 5)            | 0.3<br>(0.1 to 0.7) | 13 (3 to 31)            | 2.5<br>(0.5 to 6.5)  | 0 (0 to 1)                | 0.1 (0 to 0.2)         | 3 (1 to 6)            | 0.2<br>(0.1 to 0.4) |
| United Kingdom       | Both   | 30600<br>(28400 to 32300) | 23.5<br>(21.9 to 24.8) | 2620<br>(1560 to 3970) | 2 (1.2 to 3)        | 2 (0 to 7)           | 0 (0 to 0)          | 1410<br>(803 to 2140) | 1.1<br>(0.7 to 1.7) | 2270<br>(444 to 4600) | 1.7<br>(0.3 to 3.5) | 1910<br>(596 to 2850) | 1.5<br>(0.5 to 2.2) | 5590<br>(1410 to 11700) | 4.2 (1 to 8.7)       | 14300<br>(11100 to 17100) | 10.3<br>(8.1 to 12.4)  | 1430<br>(257 to 2730) | 1.2<br>(0.2 to 2.3) |
|                      | Male   | 17100<br>(16100 to 17900) | 28.7<br>(27 to 30.1)   | 1430<br>(853 to 2170)  | 2.4<br>(1.4 to 3.7) | 1 (0 to 3)           | 0 (0 to 0)          | 798<br>(449 to 1220)  | 1.4<br>(0.8 to 2.1) | 1230<br>(236 to 2520) | 2.1<br>(0.4 to 4.2) | 1020<br>(320 to 1530) | 1.7<br>(0.5 to 2.6) | 3200<br>(569 to 7040)   | 5.3<br>(0.9 to 11.7) | 11200<br>(8340 to 13700)  | 18.1<br>(13.5 to 22.3) | 961<br>(165 to 1840)  | 1.7<br>(0.3 to 3.2) |
|                      | Female | 13500<br>(12300 to 14600) | 19.2<br>(17.6 to 20.6) | 1190<br>(711 to 1790)  | 1.7 (1 to 2.5)      | 1 (0 to 4)           | 0 (0 to 0)          | 610<br>(339 to 947)   | 0.9<br>(0.5 to 1.5) | 1040<br>(209 to 2080) | 1.5<br>(0.3 to 3)   | 885<br>(280 to 1340)  | 1.3<br>(0.4 to 1.9) | 2400<br>(497 to 5450)   | 3.2<br>(0.7 to 7.3)  | 3070<br>(1660 to 4320)    | 3.9<br>(2.1 to 5.5)    | 469<br>(71 to 916)    | 0.8<br>(0.1 to 1.5) |
| Tanzania             | Both   | 951<br>(659 to 1430)      | 4.3 (3 to 6.4)         | 120<br>(52 to 230)     | 0.5<br>(0.2 to 1)   | 643<br>(400 to 1020) | 2.8<br>(1.8 to 4.3) | 61 (28 to 111)        | 0.3<br>(0.1 to 0.5) | 88 (5 to 373)         | 0.4 (0 to 1.6)      | 90 (22 to 174)        | 0.4<br>(0.1 to 0.7) | 121<br>(24 to 311)      | 0.6<br>(0.1 to 1.5)  | 103<br>(28 to 463)        | 0.5<br>(0.1 to 2.3)    | 137<br>(56 to 270)    | 0.5<br>(0.2 to 1)   |
|                      | Male   | 843<br>(573 to 1310)      | 8.1<br>(5.6 to 11.1)   | 94 (38 to 190)         | 0.9<br>(0.4 to 1.4) | 452<br>(262 to 642)  | 4.2<br>(2.5 to 5.9) | 37 (16 to 76)         | 0.3<br>(0.2 to 0.4) | 64 (4 to 274)         | 0.6 (0 to 2.5)      | 64 (15 to 133)        | 0.6<br>(0.1 to 1.1) | 92 (14 to 254)          | 0.9<br>(0.1 to 1.7)  | 78 (15 to 424)            | 0.9<br>(0.2 to 1.6)    | 100<br>(38 to 211)    | 0.8<br>(0.3 to 1.3) |

|                                |        |                                    |                           |                            |                        |                        |                        |                            |                        |                            |                        |                            |                        |                             |                         |                              |                          |                            |                        |
|--------------------------------|--------|------------------------------------|---------------------------|----------------------------|------------------------|------------------------|------------------------|----------------------------|------------------------|----------------------------|------------------------|----------------------------|------------------------|-----------------------------|-------------------------|------------------------------|--------------------------|----------------------------|------------------------|
|                                |        |                                    | to<br>12.4)               |                            | to<br>1.7)             | to<br>778)             | to<br>7.1)             |                            | to<br>0.7)             |                            |                        |                            | to<br>1.2)             |                             | to<br>2.5)              |                              | to<br>4.7)               |                            | to<br>1.6)             |
|                                | Female | 108<br>(77 to<br>144)              | 0.9<br>(0.7 to<br>1.3)    | 26 (12<br>to 47)           | 0.2<br>(0.1 to<br>0.4) | 192<br>(132 to<br>261) | 1.6<br>(1.1 to<br>2.1) | 23 (12<br>to 39)           | 0.2<br>(0.1 to<br>0.3) | 24 (2<br>to 92)            | 0.2 (0<br>to<br>0.8)   | 26 (7<br>to 42)            | 0.2<br>(0.1 to<br>0.3) | 29 (5<br>to 72)             | 0.3 (0<br>to<br>0.6)    | 25 (7<br>to 53)              | 0.2<br>(0.1 to<br>0.5)   | 37 (15<br>to 68)           | 0.3<br>(0.1 to<br>0.5) |
| Virgin<br>Islands              | Both   | 21 (17<br>to 26)                   | 10.9<br>(8.8 to<br>13.2)  | 2 (1 to<br>4)              | 1.3<br>(0.6 to<br>2.2) | 0 (0 to<br>0)          | 0 (0 to<br>0.1)        | 2 (1 to<br>3)              | 1 (0.6<br>to<br>1.5)   | 1 (0 to<br>5)              | 0.7<br>(0.1 to<br>2.4) | 1 (0 to<br>1)              | 0.5<br>(0.1 to<br>0.8) | 6 (1 to<br>13)              | 3.1<br>(0.8 to<br>6.6)  | 7 (4 to<br>10)               | 3.7<br>(2.3 to<br>5.3)   | 3 (1 to<br>4)              | 1.4<br>(0.7 to<br>2.3) |
|                                | Male   | 15 (12<br>to 19)                   | 17.9<br>(14.4 to<br>21.7) | 2 (1 to<br>3)              | 1.9<br>(0.8 to<br>3.2) | 0 (0 to<br>0)          | 0 (0 to<br>0.1)        | 1 (1 to<br>2)              | 1.5<br>(0.8 to<br>2.4) | 1 (0 to<br>3)              | 1 (0.1<br>to<br>3.6)   | 1 (0 to<br>1)              | 0.6<br>(0.2 to<br>1.1) | 4 (1 to<br>9)               | 4.6<br>(0.8 to<br>10.6) | 6 (4 to<br>10)               | 7.9<br>(4.7 to<br>11.9)  | 2 (1 to<br>4)              | 2.3 (1<br>to 4)        |
|                                | Female | 6 (4 to<br>8)                      | 5.4 (4<br>to 7)           | 1 (0 to<br>2)              | 0.8<br>(0.4 to<br>1.5) | 0 (0 to<br>0)          | 0 (0 to<br>0.1)        | 1 (0 to<br>1)              | 0.6<br>(0.3 to<br>0.9) | 0 (0 to<br>2)              | 0.4 (0<br>to<br>1.5)   | 0 (0 to<br>1)              | 0.3<br>(0.1 to<br>0.6) | 2 (0 to<br>5)               | 1.9<br>(0.4 to<br>4.3)  | 1 (0 to<br>1)                | 0.6<br>(0.3 to<br>0.9)   | 1 (0 to<br>1)              | 0.6<br>(0.3 to<br>1.1) |
| United<br>States of<br>America | Both   | 147000<br>(138000<br>to<br>155000) | 25.8<br>(24.2 to<br>27.1) | 8230<br>(3930 to<br>13800) | 1.4<br>(0.7 to<br>2.4) | 26 (5<br>to 82)        | 0 (0 to<br>0)          | 6720<br>(4050 to<br>10000) | 1.2<br>(0.7 to<br>1.8) | 9080<br>(1800 to<br>17400) | 1.6<br>(0.3 to<br>3.1) | 7600<br>(1920 to<br>11300) | 1.3<br>(0.3 to<br>2)   | 27700<br>(6900 to<br>57300) | 4.8<br>(1.2 to<br>9.9)  | 35600<br>(25700 to<br>46300) | 6 (4.3<br>to<br>7.8)     | 6280<br>(1040 to<br>12200) | 1.1<br>(0.2 to<br>2.2) |
|                                | Male   | 85100<br>(80800 to<br>88800)       | 32.9<br>(31.2 to<br>34.4) | 4540<br>(2180 to<br>7550)  | 1.8<br>(0.8 to<br>2.9) | 12 (2<br>to 37)        | 0 (0 to<br>0)          | 4030<br>(2410 to<br>5980)  | 1.6<br>(0.9 to<br>2.3) | 4990<br>(994 to<br>9570)   | 1.9<br>(0.4 to<br>3.7) | 4130<br>(1110 to<br>6250)  | 1.6<br>(0.4 to<br>2.4) | 16800<br>(3050 to<br>36300) | 6.5<br>(1.2 to<br>13.9) | 30500<br>(20700 to<br>40700) | 11.8<br>(8.1 to<br>15.8) | 3860<br>(586 to<br>7570)   | 1.5<br>(0.2 to<br>2.9) |
|                                | Female | 62300<br>(56700 to<br>67300)       | 19.9<br>(18.3 to<br>21.5) | 3690<br>(1780 to<br>6170)  | 1.2<br>(0.6 to<br>2)   | 14 (3<br>to 45)        | 0 (0 to<br>0)          | 2690<br>(1610 to<br>4070)  | 0.9<br>(0.5 to<br>1.4) | 4090<br>(809 to<br>7870)   | 1.3<br>(0.3 to<br>2.5) | 3460<br>(900 to<br>5320)   | 1.1<br>(0.3 to<br>1.7) | 10900<br>(2250 to<br>24700) | 3.4<br>(0.7 to<br>7.7)  | 5150<br>(3020 to<br>7600)    | 1.5<br>(0.9 to<br>2.3)   | 2420<br>(352 to<br>4810)   | 0.8<br>(0.1 to<br>1.6) |
| Uruguay                        | Both   | 1180<br>(1090 to<br>1260)          | 22.7<br>(21 to<br>24.4)   | 104<br>(47 to<br>174)      | 2 (0.9<br>to<br>3.3)   | 7 (2 to<br>16)         | 0.1 (0<br>to<br>0.3)   | 106<br>(62 to<br>161)      | 2 (1.2<br>to<br>3.1)   | 54 (4<br>to<br>201)        | 1 (0.1<br>to<br>3.8)   | 62 (14<br>to 94)           | 1.2<br>(0.3 to<br>1.8) | 133<br>(28 to<br>301)       | 2.4<br>(0.5 to<br>5.5)  | 155<br>(93 to<br>228)        | 2.7<br>(1.6 to<br>3.9)   | 111<br>(55 to<br>176)      | 2.3<br>(1.1 to<br>3.6) |
|                                | Male   | 940<br>(870 to<br>1010)            | 41.7<br>(38.6 to<br>44.7) | 77 (34<br>to<br>128)       | 3.4<br>(1.5 to<br>5.7) | 4 (1 to<br>11)         | 0.2<br>(0.1 to<br>0.5) | 77 (45<br>to<br>117)       | 3.4 (2<br>to<br>5.2)   | 40 (3<br>to<br>148)        | 1.8<br>(0.1 to<br>6.6) | 45 (11<br>to 69)           | 2 (0.5<br>to<br>3.1)   | 105<br>(17 to<br>244)       | 4.6<br>(0.8 to<br>10.6) | 142<br>(81 to<br>211)        | 6.1<br>(3.5 to<br>9.1)   | 91 (42<br>to<br>147)       | 4.1<br>(1.9 to<br>6.6) |
|                                | Female | 239<br>(210 to<br>271)             | 8.3<br>(7.4 to<br>9.3)    | 27 (13<br>to 45)           | 0.9<br>(0.4 to<br>1.5) | 2 (1 to<br>6)          | 0.1 (0<br>to<br>0.2)   | 29 (17<br>to 43)           | 1 (0.6<br>to<br>1.5)   | 14 (1<br>to 52)            | 0.5 (0<br>to<br>1.7)   | 17 (4<br>to 26)            | 0.6<br>(0.1 to<br>0.9) | 28 (5<br>to 68)             | 0.9<br>(0.2 to<br>2.1)  | 13 (7<br>to 20)              | 0.4<br>(0.2 to<br>0.6)   | 20 (9<br>to 34)            | 0.8<br>(0.3 to<br>1.3) |

|            |        |                           |                        |                        |                     |                        |                       |                       |                     |                     |                     |                       |                     |                       |                      |                       |                     |                       |                     |
|------------|--------|---------------------------|------------------------|------------------------|---------------------|------------------------|-----------------------|-----------------------|---------------------|---------------------|---------------------|-----------------------|---------------------|-----------------------|----------------------|-----------------------|---------------------|-----------------------|---------------------|
| Uzbekistan | Both   | 1330<br>(1080 to 1620)    | 6.4<br>(5.2 to 7.6)    | 518<br>(314 to 765)    | 2.5<br>(1.6 to 3.7) | 56 (21 to 117)         | 0.3<br>(0.1 to 0.6)   | 119<br>(64 to 192)    | 0.6<br>(0.3 to 0.9) | 160<br>(14 to 597)  | 0.8<br>(0.1 to 2.9) | 101<br>(23 to 161)    | 0.5<br>(0.1 to 0.8) | 208<br>(44 to 468)    | 1.1<br>(0.2 to 2.4)  | 50 (28 to 83)         | 0.3<br>(0.2 to 0.5) | 237<br>(113 to 392)   | 0.8<br>(0.4 to 1.4) |
|            | Male   | 1280<br>(1040 to 1550)    | 14.3<br>(11.8 to 17)   | 377<br>(226 to 560)    | 4.1<br>(2.5 to 6.2) | 36 (13 to 80)          | 0.4<br>(0.1 to 0.9)   | 75 (39 to 120)        | 0.9<br>(0.4 to 1.4) | 115<br>(10 to 436)  | 1.3<br>(0.1 to 4.8) | 72 (16 to 117)        | 0.8<br>(0.2 to 1.3) | 156<br>(25 to 361)    | 1.8<br>(0.3 to 4.2)  | 41 (21 to 72)         | 0.6<br>(0.3 to 1)   | 197<br>(90 to 335)    | 1.5<br>(0.7 to 2.6) |
|            | Female | 55 (38 to 78)             | 0.5<br>(0.3 to 0.6)    | 141<br>(84 to 210)     | 1.3<br>(0.8 to 1.9) | 20 (8 to 41)           | 0.2<br>(0.1 to 0.4)   | 44 (25 to 70)         | 0.4<br>(0.2 to 0.6) | 45 (4 to 166)       | 0.4 (0 to 1.6)      | 29 (6 to 46)          | 0.3<br>(0.1 to 0.4) | 53 (10 to 126)        | 0.5<br>(0.1 to 1.3)  | 8 (4 to 14)           | 0.1<br>(0.1 to 0.2) | 40 (18 to 70)         | 0.3<br>(0.1 to 0.5) |
| Vanuatu    | Both   | 21 (13 to 31)             | 13<br>(8.2 to 19.9)    | 2 (0 to 5)             | 1.1<br>(0.3 to 2.8) | 11 (6 to 18)           | 6.9 (4 to 11.1)       | 2 (1 to 3)            | 0.9<br>(0.4 to 1.6) | 1 (0 to 6)          | 0.9<br>(0.1 to 3.5) | 2 (0 to 3)            | 1.1<br>(0.2 to 1.9) | 6 (1 to 13)           | 3.6<br>(0.7 to 8.3)  | 4 (1 to 8)            | 2.7 (1 to 5)        | 2 (1 to 5)            | 1.2<br>(0.5 to 2.4) |
|            | Male   | 19 (12 to 30)             | 23.5<br>(14.5 to 36.4) | 2 (0 to 4)             | 1.9<br>(0.5 to 4.8) | 9 (5 to 15)            | 10.4<br>(5.5 to 17.7) | 1 (0 to 2)            | 1.3<br>(0.6 to 2.5) | 1 (0 to 5)          | 1.3<br>(0.1 to 5.5) | 1 (0 to 3)            | 1.6<br>(0.3 to 3.1) | 5 (1 to 11)           | 5.5<br>(0.9 to 13.6) | 4 (1 to 7)            | 5.1<br>(1.8 to 9.5) | 2 (1 to 4)            | 2 (0.8 to 4)        |
|            | Female | 1 (1 to 2)                | 1.4<br>(0.9 to 2.1)    | 0 (0 to 1)             | 0.4<br>(0.1 to 0.8) | 2 (1 to 4)             | 3.1<br>(1.8 to 4.7)   | 0 (0 to 1)            | 0.5<br>(0.2 to 0.8) | 0 (0 to 1)          | 0.4 (0 to 1.3)      | 0 (0 to 1)            | 0.4<br>(0.1 to 0.8) | 1 (0 to 3)            | 1.4<br>(0.3 to 3.4)  | 0 (0 to 0)            | 0.2 (0 to 0.3)      | 0 (0 to 1)            | 0.4<br>(0.2 to 0.8) |
| Venezuela  | Both   | 2610<br>(1920 to 3420)    | 9.1<br>(6.7 to 12)     | 853<br>(490 to 1290)   | 3 (1.7 to 4.5)      | 6 (2 to 14)            | 0 (0 to 0)            | 208<br>(102 to 359)   | 0.7<br>(0.4 to 1.2) | 272<br>(25 to 932)  | 0.9<br>(0.1 to 3.2) | 193<br>(45 to 317)    | 0.7<br>(0.2 to 1.1) | 646<br>(147 to 1510)  | 2.3<br>(0.5 to 5.3)  | 133<br>(62 to 238)    | 0.5<br>(0.2 to 0.9) | 389<br>(178 to 665)   | 1.2<br>(0.6 to 2.1) |
|            | Male   | 1930<br>(1410 to 2550)    | 14.6<br>(10.8 to 19.2) | 531<br>(306 to 818)    | 4 (2.3 to 6.1)      | 3 (1 to 7)             | 0 (0 to 0.1)          | 130<br>(63 to 224)    | 1 (0.5 to 1.7)      | 169<br>(16 to 575)  | 1.3<br>(0.1 to 4.3) | 118<br>(26 to 193)    | 0.9<br>(0.2 to 1.4) | 413<br>(72 to 1000)   | 3.2<br>(0.6 to 7.6)  | 107<br>(45 to 202)    | 0.9<br>(0.4 to 1.6) | 294<br>(126 to 520)   | 2 (0.8 to 3.5)      |
|            | Female | 685<br>(477 to 966)       | 4.5<br>(3.2 to 6.3)    | 322<br>(182 to 504)    | 2.1<br>(1.2 to 3.3) | 3 (1 to 7)             | 0 (0 to 0)            | 79 (38 to 140)        | 0.5<br>(0.2 to 0.9) | 103<br>(10 to 366)  | 0.7<br>(0.1 to 2.4) | 75 (17 to 128)        | 0.5<br>(0.1 to 0.8) | 233<br>(46 to 589)    | 1.5<br>(0.3 to 3.9)  | 26 (12 to 50)         | 0.2<br>(0.1 to 0.3) | 95 (40 to 175)        | 0.6<br>(0.2 to 1.1) |
| Vietnam    | Both   | 14400<br>(11100 to 18200) | 15.5<br>(12.1 to 19.5) | 2860<br>(1750 to 4180) | 3.1<br>(1.9 to 4.4) | 2410<br>(1180 to 4260) | 2.6<br>(1.3 to 4.6)   | 1510<br>(840 to 2450) | 1.6<br>(0.9 to 2.6) | 519<br>(48 to 1850) | 0.6<br>(0.1 to 2)   | 1110<br>(290 to 1840) | 1.2<br>(0.3 to 2)   | 1950<br>(414 to 4420) | 2.3<br>(0.5 to 5.2)  | 1010<br>(530 to 1790) | 1.2<br>(0.6 to 2.1) | 2130<br>(938 to 3700) | 2 (0.9 to 3.4)      |
|            | Male   | 13600<br>(10400)          | 34.9<br>(27.3)         | 2140<br>(1290)         | 5.4<br>(3.3)        | 1590<br>(737)          | 4 (1.9 to 7.2)        | 789<br>(424)          | 2.1<br>(1.1)        | 374<br>(34 to 1340) | 0.9<br>(0.1)        | 800<br>(201)          | 2 (0.5 to 3.3)      | 1390<br>(225)         | 4.1<br>(0.7)         | 956<br>(483)          | 2.9<br>(1.6)        | 1630<br>(680)         | 3.3<br>(1.4)        |

|          |        |                         |                              |                            |                           |                            |                           |                            |                           |                       |                           |                       |                           |                            |                           |                      |                           |                           |                           |
|----------|--------|-------------------------|------------------------------|----------------------------|---------------------------|----------------------------|---------------------------|----------------------------|---------------------------|-----------------------|---------------------------|-----------------------|---------------------------|----------------------------|---------------------------|----------------------|---------------------------|---------------------------|---------------------------|
|          |        | to<br>17200)            | to<br>43.7)                  | to<br>3120)                | to<br>7.7)                | to<br>2890)                |                           | to<br>1300)                | to<br>3.4)                |                       | to<br>3.3)                | to<br>1320)           |                           | to<br>3350)                | to<br>9.8)                | to<br>1710)          | to<br>5.1)                | to<br>2930)               | to<br>5.9)                |
|          | Female | 827<br>(570 to<br>1150) | 1.7<br>(1.2<br>to<br>2.3)    | 725<br>(427<br>to<br>1100) | 1.4<br>(0.8<br>to<br>2.1) | 818<br>(425<br>to<br>1350) | 1.6<br>(0.8<br>to<br>2.6) | 723<br>(401<br>to<br>1170) | 1.4<br>(0.8<br>to<br>2.2) | 145<br>(13 to<br>512) | 0.3 (0<br>to 1)           | 314<br>(87 to<br>532) | 0.6<br>(0.2<br>to 1)      | 566<br>(106<br>to<br>1380) | 1.1<br>(0.2<br>to<br>2.8) | 56 (24<br>to<br>108) | 0.1<br>(0.1<br>to<br>0.2) | 494<br>(198<br>to<br>924) | 0.9<br>(0.3<br>to<br>1.6) |
| Yemen    | Both   | 906<br>(610 to<br>1380) | 7.4 (5<br>to<br>11.3)        | 208<br>(93 to<br>382)      | 1.7<br>(0.8<br>to 3)      | 156<br>(79 to<br>289)      | 1.2<br>(0.6<br>to<br>2.3) | 103<br>(55 to<br>176)      | 0.8<br>(0.4<br>to<br>1.4) | 49 (4<br>to<br>195)   | 0.4 (0<br>to<br>1.6)      | 72 (22<br>to<br>135)  | 0.6<br>(0.2<br>to<br>1.1) | 102<br>(20 to<br>258)      | 0.9<br>(0.2<br>to<br>2.2) | 10 (2<br>to<br>46)   | 0.1 (0<br>to<br>0.4)      | 80 (30<br>to<br>160)      | 0.5<br>(0.2<br>to<br>1.1) |
|          | Male   | 807<br>(528 to<br>1270) | 13.4<br>(8.8<br>to<br>21.1)  | 169<br>(75 to<br>323)      | 2.8<br>(1.2<br>to<br>5.3) | 116<br>(53 to<br>227)      | 1.9<br>(0.9<br>to<br>3.7) | 76 (39<br>to<br>138)       | 1.3<br>(0.6<br>to<br>2.3) | 39 (4<br>to<br>156)   | 0.6<br>(0.1<br>to<br>2.6) | 56 (17<br>to<br>111)  | 0.9<br>(0.3<br>to<br>1.8) | 81 (13<br>to<br>219)       | 1.4<br>(0.2<br>to<br>3.8) | 9 (1 to<br>43)       | 0.2 (0<br>to<br>0.9)      | 78 (30<br>to<br>157)      | 1.1<br>(0.4<br>to<br>2.1) |
|          | Female | 99 (72<br>to 133)       | 1.6<br>(1.2<br>to<br>2.1)    | 39 (17<br>to 67)           | 0.6<br>(0.3<br>to 1)      | 40 (22<br>to 64)           | 0.6<br>(0.3<br>to 1)      | 27 (15<br>to 44)           | 0.4<br>(0.2<br>to<br>0.6) | 11 (1<br>to 40)       | 0.2 (0<br>to<br>0.6)      | 16 (5<br>to 27)       | 0.2<br>(0.1<br>to<br>0.4) | 21 (4<br>to 50)            | 0.4<br>(0.1<br>to<br>0.8) | 2 (1 to<br>4)        | 0 (0<br>to<br>0.1)        | 2 (1 to<br>3)             | 0 (0<br>to 0)             |
| Zambia   | Both   | 250<br>(174 to<br>331)  | 4.4<br>(3.2<br>to<br>5.7)    | 60 (29<br>to<br>105)       | 1 (0.5<br>to<br>1.7)      | 160<br>(93 to<br>241)      | 2.6<br>(1.5<br>to<br>3.8) | 15 (6<br>to 27)            | 0.2<br>(0.1<br>to<br>0.4) | 27 (2<br>to<br>104)   | 0.4 (0<br>to<br>1.7)      | 47 (16<br>to 79)      | 0.7<br>(0.3<br>to<br>1.3) | 45 (9<br>to<br>107)        | 0.8<br>(0.2<br>to<br>1.9) | 38 (14<br>to<br>122) | 0.7<br>(0.3<br>to<br>2.3) | 43 (18<br>to 79)          | 0.6<br>(0.2<br>to 1)      |
|          | Male   | 216<br>(145 to<br>291)  | 8.1<br>(5.5<br>to<br>10.7)   | 45 (22<br>to 79)           | 1.6<br>(0.7<br>to<br>2.7) | 106<br>(60 to<br>167)      | 3.7<br>(2.1<br>to<br>5.8) | 9 (3 to<br>17)             | 0.3<br>(0.1<br>to<br>0.6) | 19 (1<br>to 70)       | 0.6 (0<br>to<br>2.5)      | 32 (11<br>to 56)      | 1.1<br>(0.4<br>to<br>1.9) | 34 (6<br>to 84)            | 1.3<br>(0.2<br>to<br>3.3) | 30 (9<br>to<br>114)  | 1.3<br>(0.4<br>to<br>4.7) | 32 (12<br>to 61)          | 0.8<br>(0.3<br>to<br>1.6) |
|          | Female | 34 (23<br>to 47)        | 1.3<br>(0.9<br>to<br>1.7)    | 15 (7<br>to 27)            | 0.4<br>(0.2<br>to<br>0.8) | 54 (32<br>to 81)           | 1.6 (1<br>to<br>2.4)      | 6 (3 to<br>12)             | 0.2<br>(0.1<br>to<br>0.3) | 8 (0 to<br>31)        | 0.2 (0<br>to<br>0.9)      | 14 (5<br>to 24)       | 0.4<br>(0.1<br>to<br>0.7) | 11 (2<br>to 27)            | 0.4<br>(0.1<br>to<br>0.9) | 8 (2 to<br>16)       | 0.3<br>(0.1<br>to<br>0.6) | 11 (4<br>to 21)           | 0.3<br>(0.1<br>to<br>0.5) |
| Zimbabwe | Both   | 475<br>(377 to<br>575)  | 7.4<br>(5.8<br>to<br>8.8)    | 66 (31<br>to<br>114)       | 1 (0.4<br>to<br>1.6)      | 231<br>(147<br>to<br>325)  | 3.4<br>(2.2<br>to<br>4.8) | 37 (20<br>to 60)           | 0.5<br>(0.3<br>to<br>0.9) | 43 (3<br>to<br>161)   | 0.6 (0<br>to<br>2.4)      | 66 (22<br>to<br>105)  | 1 (0.3<br>to<br>1.5)      | 89 (21<br>to<br>196)       | 1.4<br>(0.3<br>to<br>3.1) | 45 (25<br>to 75)     | 0.8<br>(0.4<br>to<br>1.3) | 35 (15<br>to 62)          | 0.4<br>(0.2<br>to<br>0.7) |
|          | Male   | 380<br>(303 to<br>461)  | 14.1<br>(11.5<br>to<br>16.9) | 42 (19<br>to 72)           | 1.5<br>(0.7<br>to<br>2.5) | 123<br>(78 to<br>176)      | 4.3<br>(2.8<br>to<br>6.1) | 14 (7<br>to 23)            | 0.5<br>(0.3<br>to<br>0.8) | 24 (2<br>to 88)       | 0.8<br>(0.1<br>to<br>3.1) | 37 (13<br>to 59)      | 1.3<br>(0.4<br>to<br>2.1) | 46 (8<br>to<br>110)        | 1.8<br>(0.3<br>to<br>4.3) | 24 (12<br>to 44)     | 1.1<br>(0.6<br>to 2)      | 22 (9<br>to 42)           | 0.6<br>(0.3<br>to<br>1.1) |
|          | Female | 95 (63<br>to 133)       | 2.7<br>(1.8<br>to<br>3.8)    | 24 (10<br>to 42)           | 0.6<br>(0.3<br>to<br>1.1) | 107<br>(65 to<br>156)      | 2.8<br>(1.7<br>to 4)      | 23 (12<br>to 39)           | 0.6<br>(0.3<br>to<br>0.9) | 19 (1<br>to 71)       | 0.5 (0<br>to<br>1.8)      | 28 (9<br>to 48)       | 0.7<br>(0.2<br>to<br>1.2) | 44 (8<br>to<br>106)        | 1.2<br>(0.2<br>to<br>2.9) | 21 (8<br>to 40)      | 0.6<br>(0.2<br>to<br>1.2) | 13 (5<br>to 24)           | 0.3<br>(0.1<br>to<br>0.5) |

**Table S5. Larynx cancer deaths (counts and age-standardised rates) attributable to specific risk factors in 2019, at global, regional, national levels, and Socio-demographic Index (SDI) quintiles, by sex and for both sexes combined.**

95% UIs given in parentheses.

| Location        | Sex    | Smoking                |                     | Alcohol use            |                     | Occupational asbestos exposure |                     | Occupational exposure to sulfuric acid |                     |
|-----------------|--------|------------------------|---------------------|------------------------|---------------------|--------------------------------|---------------------|----------------------------------------|---------------------|
|                 |        | Number                 | ASDR per 100,000    | Number                 | ASDR per 100,000    | Number                         | ASDR per 100,000    | Number                                 | ASDR per 100,000    |
| Global          | Both   | 78300 (68000 to 88300) | 0.95 (0.82 to 1.07) | 23900 (14100 to 32600) | 0.29 (0.17 to 0.39) | 3680 (2040 to 5530)            | 0.05 (0.03 to 0.07) | 4030 (1730 to 7470)                    | 0.05 (0.02 to 0.09) |
|                 | Male   | 73400 (63900 to 82700) | 1.91 (1.66 to 2.14) | 22900 (13700 to 31100) | 0.59 (0.35 to 0.8)  | 3450 (1870 to 5280)            | 0.1 (0.05 to 0.15)  | 3590 (1520 to 6670)                    | 0.09 (0.04 to 0.16) |
|                 | Female | 4870 (3720 to 5950)    | 0.11 (0.08 to 0.14) | 1010 (487 to 1550)     | 0.02 (0.01 to 0.04) | 234 (106 to 377)               | 0.01 (0 to 0.01)    | 438 (188 to 799)                       | 0.01 (0 to 0.02)    |
| High SDI        | Both   | 10400 (8750 to 11700)  | 0.56 (0.48 to 0.63) | 4240 (2570 to 5630)    | 0.23 (0.14 to 0.31) | 1500 (854 to 2180)             | 0.07 (0.04 to 0.11) | 348 (92 to 746)                        | 0.02 (0.01 to 0.04) |
|                 | Male   | 9040 (7670 to 10200)   | 1.06 (0.91 to 1.19) | 3820 (2360 to 4990)    | 0.45 (0.28 to 0.59) | 1430 (791 to 2110)             | 0.16 (0.09 to 0.23) | 299 (81 to 635)                        | 0.04 (0.01 to 0.08) |
|                 | Female | 1310 (1030 to 1550)    | 0.13 (0.11 to 0.15) | 424 (223 to 617)       | 0.04 (0.02 to 0.06) | 68 (30 to 111)                 | 0.01 (0 to 0.01)    | 49 (12 to 107)                         | 0.01 (0 to 0.01)    |
| High-middle SDI | Both   | 21900 (19200 to 24400) | 1.06 (0.93 to 1.18) | 8220 (5050 to 10900)   | 0.4 (0.24 to 0.53)  | 1050 (573 to 1590)             | 0.05 (0.03 to 0.08) | 841 (340 to 1570)                      | 0.04 (0.02 to 0.08) |
|                 | Male   | 20800 (18200 to 23100) | 2.23 (1.95 to 2.48) | 7980 (4900 to 10500)   | 0.85 (0.52 to 1.12) | 989 (523 to 1530)              | 0.12 (0.06 to 0.18) | 760 (305 to 1430)                      | 0.08 (0.03 to 0.14) |
|                 | Female | 1150 (888 to 1410)     | 0.1 (0.08 to 0.12)  | 242 (113 to 375)       | 0.02 (0.01 to 0.03) | 56 (26 to 92)                  | 0 (0 to 0.01)       | 80 (34 to 148)                         | 0.01 (0 to 0.01)    |
| Middle SDI      | Both   | 21900 (18500 to 25200) | 0.89 (0.75 to 1.02) | 6310 (3630 to 8930)    | 0.25 (0.14 to 0.35) | 512 (280 to 804)               | 0.02 (0.01 to 0.04) | 1230 (512 to 2280)                     | 0.05 (0.02 to 0.08) |
|                 | Male   | 20800 (17600 to 24000) | 1.8 (1.53 to 2.06)  | 6120 (3560 to 8650)    | 0.51 (0.29 to 0.71) | 464 (231 to 753)               | 0.05 (0.02 to 0.08) | 1090 (454 to 2010)                     | 0.08 (0.03 to 0.15) |
|                 | Female | 1120 (791 to 1440)     | 0.09 (0.06 to 0.12) | 185 (81 to 299)        | 0.01 (0.01 to 0.02) | 48 (22 to 80)                  | 0 (0 to 0.01)       | 143 (59 to 264)                        | 0.01 (0 to 0.02)    |
| Low-middle SDI  | Both   | 18800 (15600 to 22300) | 1.38 (1.15 to 1.64) | 3920 (2160 to 5760)    | 0.28 (0.15 to 0.41) | 508 (269 to 819)               | 0.04 (0.02 to 0.07) | 1200 (507 to 2250)                     | 0.08 (0.03 to 0.15) |
|                 | Male   | 17900 (14900 to 21200) | 2.76 (2.31 to 3.26) | 3820 (2110 to 5620)    | 0.56 (0.31 to 0.83) | 463 (232 to 762)               | 0.08 (0.04 to 0.14) | 1080 (459 to 2030)                     | 0.15 (0.06 to 0.28) |
|                 | Female | 920 (635 to 1240)      | 0.13 (0.09 to 0.18) | 103 (41 to 174)        | 0.01 (0.01 to 0.02) | 46 (19 to 82)                  | 0.01 (0 to 0.01)    | 120 (49 to 225)                        | 0.02 (0.01 to 0.03) |

|                           |        |                     |                     |                     |                     |                  |                     |                  |                     |
|---------------------------|--------|---------------------|---------------------|---------------------|---------------------|------------------|---------------------|------------------|---------------------|
| Low SDI                   | Both   | 5220 (4060 to 6600) | 1.02 (0.8 to 1.28)  | 1190 (609 to 1770)  | 0.22 (0.11 to 0.33) | 116 (55 to 258)  | 0.03 (0.01 to 0.06) | 410 (170 to 771) | 0.07 (0.03 to 0.13) |
|                           | Male   | 4870 (3780 to 6160) | 1.95 (1.53 to 2.44) | 1130 (586 to 1670)  | 0.42 (0.22 to 0.63) | 99 (42 to 236)   | 0.05 (0.02 to 0.11) | 364 (149 to 688) | 0.12 (0.05 to 0.23) |
|                           | Female | 358 (247 to 487)    | 0.14 (0.1 to 0.19)  | 58 (25 to 94)       | 0.02 (0.01 to 0.03) | 17 (6 to 30)     | 0.01 (0 to 0.01)    | 47 (19 to 85)    | 0.02 (0.01 to 0.03) |
| Central Asia              | Both   | 869 (747 to 997)    | 1.14 (0.98 to 1.31) | 260 (150 to 365)    | 0.32 (0.18 to 0.45) | 22 (12 to 35)    | 0.03 (0.02 to 0.05) | 48 (20 to 90)    | 0.05 (0.02 to 0.1)  |
|                           | Male   | 848 (729 to 977)    | 2.66 (2.27 to 3.04) | 247 (144 to 346)    | 0.7 (0.4 to 0.99)   | 20 (10 to 32)    | 0.08 (0.04 to 0.12) | 40 (16 to 75)    | 0.1 (0.04 to 0.19)  |
|                           | Female | 21 (13 to 31)       | 0.05 (0.03 to 0.07) | 12 (4 to 21)        | 0.03 (0.01 to 0.05) | 2 (1 to 4)       | 0.01 (0 to 0.01)    | 8 (3 to 14)      | 0.02 (0.01 to 0.03) |
| Central Europe            | Both   | 3990 (3330 to 4700) | 1.96 (1.64 to 2.3)  | 1850 (1160 to 2460) | 0.92 (0.57 to 1.22) | 155 (79 to 245)  | 0.07 (0.04 to 0.11) | 121 (27 to 273)  | 0.06 (0.01 to 0.14) |
|                           | Male   | 3730 (3110 to 4400) | 4.06 (3.38 to 4.78) | 1800 (1120 to 2390) | 1.97 (1.23 to 2.61) | 149 (75 to 240)  | 0.16 (0.08 to 0.25) | 112 (25 to 251)  | 0.12 (0.03 to 0.28) |
|                           | Female | 259 (198 to 323)    | 0.23 (0.18 to 0.29) | 48 (19 to 78)       | 0.04 (0.02 to 0.07) | 6 (2 to 10)      | 0 (0 to 0.01)       | 10 (2 to 22)     | 0.01 (0 to 0.02)    |
| Eastern Europe            | Both   | 5160 (4340 to 6000) | 1.51 (1.27 to 1.75) | 2200 (1320 to 2940) | 0.65 (0.39 to 0.87) | 127 (65 to 207)  | 0.04 (0.02 to 0.06) | 118 (26 to 261)  | 0.04 (0.01 to 0.08) |
|                           | Male   | 5090 (4290 to 5920) | 3.72 (3.14 to 4.32) | 2150 (1290 to 2860) | 1.56 (0.94 to 2.09) | 121 (60 to 201)  | 0.09 (0.05 to 0.15) | 111 (25 to 247)  | 0.08 (0.02 to 0.17) |
|                           | Female | 76 (52 to 103)      | 0.04 (0.03 to 0.06) | 50 (23 to 78)       | 0.03 (0.01 to 0.04) | 5 (2 to 9)       | 0 (0 to 0)          | 7 (1 to 15)      | 0 (0 to 0.01)       |
| Australasia               | Both   | 143 (109 to 174)    | 0.29 (0.23 to 0.35) | 98 (60 to 130)      | 0.2 (0.12 to 0.26)  | 53 (31 to 76)    | 0.1 (0.06 to 0.14)  | 6 (1 to 14)      | 0.01 (0 to 0.03)    |
|                           | Male   | 124 (94 to 152)     | 0.54 (0.42 to 0.66) | 90 (56 to 119)      | 0.39 (0.24 to 0.51) | 51 (29 to 73)    | 0.21 (0.12 to 0.3)  | 6 (1 to 13)      | 0.03 (0.01 to 0.06) |
|                           | Female | 19 (14 to 24)       | 0.07 (0.05 to 0.09) | 8 (4 to 12)         | 0.03 (0.01 to 0.05) | 2 (1 to 4)       | 0.01 (0 to 0.01)    | 1 (0 to 2)       | 0 (0 to 0.01)       |
| High-income Asia Pacific  | Both   | 1280 (1060 to 1450) | 0.27 (0.23 to 0.3)  | 419 (236 to 600)    | 0.09 (0.05 to 0.13) | 137 (69 to 210)  | 0.02 (0.01 to 0.04) | 31 (7 to 68)     | 0.01 (0 to 0.02)    |
|                           | Male   | 1200 (1010 to 1360) | 0.58 (0.48 to 0.65) | 391 (223 to 559)    | 0.19 (0.11 to 0.27) | 133 (66 to 206)  | 0.06 (0.03 to 0.09) | 28 (7 to 61)     | 0.01 (0 to 0.03)    |
|                           | Female | 72 (49 to 99)       | 0.03 (0.02 to 0.03) | 27 (14 to 44)       | 0.01 (0.01 to 0.02) | 4 (1 to 7)       | 0 (0 to 0)          | 3 (1 to 6)       | 0 (0 to 0)          |
| High-income North America | Both   | 3910 (3180 to 4500) | 0.62 (0.51 to 0.71) | 1340 (775 to 1820)  | 0.22 (0.13 to 0.29) | 476 (266 to 699) | 0.07 (0.04 to 0.1)  | 151 (37 to 331)  | 0.03 (0.01 to 0.05) |
|                           | Male   | 3210 (2610 to 3680) | 1.11 (0.9 to 1.27)  | 1160 (680 to 1560)  | 0.4 (0.24 to 0.55)  | 451 (241 to 675) | 0.16 (0.08 to 0.23) | 122 (29 to 264)  | 0.04 (0.01 to 0.09) |
|                           | Female | 703 (565 to 828)    | 0.21 (0.17 to 0.24) | 179 (92 to 267)     | 0.05 (0.03 to 0.08) | 24 (11 to 40)    | 0.01 (0 to 0.01)    | 29 (7 to 64)     | 0.01 (0 to 0.02)    |

|                              |        |                     |                     |                     |                     |                    |                     |                 |                     |
|------------------------------|--------|---------------------|---------------------|---------------------|---------------------|--------------------|---------------------|-----------------|---------------------|
| Southern Latin America       | Both   | 858 (705 to 1000)   | 1.03 (0.85 to 1.21) | 430 (267 to 573)    | 0.52 (0.32 to 0.69) | 56 (28 to 91)      | 0.07 (0.03 to 0.11) | 46 (19 to 84)   | 0.06 (0.02 to 0.1)  |
|                              | Male   | 772 (635 to 902)    | 2.08 (1.7 to 2.43)  | 399 (250 to 527)    | 1.08 (0.68 to 1.43) | 53 (25 to 87)      | 0.15 (0.07 to 0.24) | 42 (17 to 77)   | 0.11 (0.05 to 0.2)  |
|                              | Female | 85 (65 to 105)      | 0.19 (0.14 to 0.23) | 31 (16 to 48)       | 0.07 (0.04 to 0.1)  | 4 (2 to 7)         | 0.01 (0 to 0.01)    | 4 (2 to 7)      | 0.01 (0 to 0.02)    |
| Western Europe               | Both   | 6870 (5890 to 7700) | 0.8 (0.69 to 0.88)  | 3260 (2030 to 4190) | 0.38 (0.24 to 0.49) | 1240 (705 to 1810) | 0.12 (0.07 to 0.18) | 182 (42 to 409) | 0.02 (0.01 to 0.05) |
|                              | Male   | 6230 (5340 to 6980) | 1.57 (1.35 to 1.74) | 3020 (1890 to 3850) | 0.77 (0.48 to 0.97) | 1190 (667 to 1760) | 0.27 (0.15 to 0.41) | 164 (38 to 369) | 0.04 (0.01 to 0.1)  |
|                              | Female | 641 (481 to 770)    | 0.14 (0.11 to 0.16) | 245 (133 to 355)    | 0.05 (0.03 to 0.08) | 50 (21 to 82)      | 0.01 (0 to 0.01)    | 17 (4 to 39)    | 0 (0 to 0.01)       |
| Andean Latin America         | Both   | 129 (89 to 177)     | 0.24 (0.16 to 0.33) | 57 (27 to 89)       | 0.1 (0.05 to 0.16)  | 11 (5 to 18)       | 0.02 (0.01 to 0.03) | 14 (6 to 27)    | 0.03 (0.01 to 0.05) |
|                              | Male   | 121 (84 to 167)     | 0.47 (0.32 to 0.64) | 53 (26 to 82)       | 0.2 (0.09 to 0.31)  | 9 (4 to 17)        | 0.04 (0.02 to 0.07) | 12 (5 to 22)    | 0.04 (0.02 to 0.08) |
|                              | Female | 8 (4 to 12)         | 0.03 (0.02 to 0.04) | 4 (1 to 7)          | 0.01 (0 to 0.02)    | 1 (1 to 2)         | 0 (0 to 0.01)       | 3 (1 to 5)      | 0.01 (0 to 0.02)    |
| Caribbean                    | Both   | 1010 (807 to 1230)  | 1.93 (1.55 to 2.36) | 305 (165 to 441)    | 0.58 (0.32 to 0.85) | 21 (10 to 35)      | 0.04 (0.02 to 0.07) | 55 (23 to 101)  | 0.11 (0.04 to 0.19) |
|                              | Male   | 920 (738 to 1120)   | 3.78 (3.04 to 4.63) | 293 (158 to 423)    | 1.19 (0.64 to 1.72) | 20 (9 to 33)       | 0.08 (0.04 to 0.14) | 50 (21 to 92)   | 0.2 (0.08 to 0.37)  |
|                              | Female | 85 (63 to 109)      | 0.31 (0.23 to 0.39) | 12 (5 to 19)        | 0.04 (0.02 to 0.07) | 1 (1 to 2)         | 0 (0 to 0.01)       | 5 (2 to 10)     | 0.02 (0.01 to 0.04) |
| Central Latin America        | Both   | 1190 (894 to 1520)  | 0.52 (0.39 to 0.66) | 467 (255 to 669)    | 0.2 (0.11 to 0.28)  | 54 (28 to 86)      | 0.02 (0.01 to 0.04) | 97 (40 to 179)  | 0.04 (0.02 to 0.07) |
|                              | Male   | 1110 (833 to 1400)  | 1.05 (0.79 to 1.33) | 446 (245 to 637)    | 0.41 (0.22 to 0.58) | 49 (24 to 82)      | 0.05 (0.02 to 0.08) | 86 (36 to 158)  | 0.08 (0.03 to 0.14) |
|                              | Female | 87 (56 to 127)      | 0.07 (0.04 to 0.1)  | 21 (8 to 37)        | 0.02 (0.01 to 0.03) | 4 (2 to 8)         | 0 (0 to 0.01)       | 11 (4 to 22)    | 0.01 (0 to 0.02)    |
| Tropical Latin America       | Both   | 3190 (2610 to 3730) | 1.3 (1.06 to 1.53)  | 1180 (674 to 1630)  | 0.47 (0.27 to 0.65) | 152 (85 to 233)    | 0.06 (0.04 to 0.1)  | 200 (83 to 370) | 0.08 (0.03 to 0.15) |
|                              | Male   | 2880 (2390 to 3360) | 2.6 (2.13 to 3.05)  | 1130 (652 to 1560)  | 0.99 (0.57 to 1.36) | 133 (69 to 211)    | 0.13 (0.07 to 0.21) | 182 (75 to 334) | 0.15 (0.06 to 0.28) |
|                              | Female | 306 (225 to 387)    | 0.23 (0.17 to 0.29) | 48 (20 to 79)       | 0.04 (0.02 to 0.06) | 19 (9 to 32)       | 0.01 (0.01 to 0.02) | 18 (7 to 35)    | 0.01 (0.01 to 0.03) |
| North Africa and Middle East | Both   | 5100 (4310 to 5920) | 1.22 (1.02 to 1.43) | 263 (128 to 414)    | 0.06 (0.03 to 0.09) | 133 (63 to 237)    | 0.04 (0.02 to 0.07) | 212 (86 to 388) | 0.04 (0.02 to 0.08) |
|                              | Male   | 4890 (4130 to 5660) | 2.31 (1.94 to 2.7)  | 253 (123 to 397)    | 0.11 (0.05 to 0.17) | 124 (56 to 224)    | 0.07 (0.03 to 0.12) | 199 (81 to 366) | 0.08 (0.03 to 0.15) |
|                              | Female | 217 (157 to 285)    | 0.1 (0.07 to 0.14)  | 9 (4 to 17)         | 0 (0 to 0.01)       | 9 (4 to 16)        | 0 (0 to 0.01)       | 12 (5 to 23)    | 0.01 (0 to 0.01)    |

|                             |        |                        |                     |                     |                     |                  |                     |                    |                     |
|-----------------------------|--------|------------------------|---------------------|---------------------|---------------------|------------------|---------------------|--------------------|---------------------|
| South Asia                  | Both   | 21700 (17400 to 27000) | 1.55 (1.26 to 1.93) | 4530 (2390 to 6800) | 0.31 (0.16 to 0.46) | 617 (322 to 996) | 0.05 (0.03 to 0.08) | 1530 (644 to 2890) | 0.1 (0.04 to 0.19)  |
|                             | Male   | 20700 (16600 to 25700) | 3.02 (2.43 to 3.73) | 4450 (2360 to 6680) | 0.61 (0.32 to 0.93) | 570 (279 to 941) | 0.1 (0.05 to 0.16)  | 1410 (585 to 2680) | 0.18 (0.08 to 0.35) |
|                             | Female | 1010 (674 to 1410)     | 0.14 (0.1 to 0.2)   | 82 (30 to 148)      | 0.01 (0 to 0.02)    | 48 (18 to 93)    | 0.01 (0 to 0.01)    | 118 (47 to 229)    | 0.02 (0.01 to 0.03) |
| East Asia                   | Both   | 15800 (12500 to 19300) | 0.75 (0.6 to 0.92)  | 4800 (2770 to 7010) | 0.23 (0.13 to 0.33) | 236 (126 to 381) | 0.01 (0.01 to 0.02) | 779 (323 to 1500)  | 0.03 (0.01 to 0.07) |
|                             | Male   | 14800 (11600 to 18200) | 1.54 (1.23 to 1.88) | 4660 (2690 to 6820) | 0.47 (0.27 to 0.68) | 196 (93 to 333)  | 0.03 (0.01 to 0.04) | 648 (266 to 1280)  | 0.06 (0.02 to 0.11) |
|                             | Female | 972 (645 to 1330)      | 0.09 (0.06 to 0.12) | 139 (60 to 233)     | 0.01 (0.01 to 0.02) | 40 (16 to 68)    | 0 (0 to 0.01)       | 131 (55 to 249)    | 0.01 (0 to 0.02)    |
| Oceania                     | Both   | 27 (19 to 37)          | 0.42 (0.3 to 0.55)  | 4 (1 to 7)          | 0.05 (0.01 to 0.1)  | 1 (0 to 2)       | 0.02 (0.01 to 0.03) | 1 (0 to 2)         | 0.01 (0.01 to 0.03) |
|                             | Male   | 23 (16 to 31)          | 0.73 (0.53 to 0.97) | 4 (1 to 7)          | 0.1 (0.02 to 0.2)   | 1 (0 to 2)       | 0.04 (0.02 to 0.06) | 1 (0 to 2)         | 0.02 (0.01 to 0.04) |
|                             | Female | 4 (2 to 6)             | 0.11 (0.07 to 0.16) | 0 (0 to 0)          | 0 (0 to 0.01)       | 0 (0 to 0)       | 0 (0 to 0)          | 0 (0 to 1)         | 0.01 (0 to 0.02)    |
| Southeast Asia              | Both   | 4810 (3970 to 5860)    | 0.81 (0.67 to 0.98) | 1310 (756 to 1830)  | 0.21 (0.12 to 0.29) | 90 (44 to 152)   | 0.02 (0.01 to 0.03) | 265 (110 to 498)   | 0.04 (0.02 to 0.07) |
|                             | Male   | 4600 (3820 to 5630)    | 1.73 (1.45 to 2.11) | 1280 (744 to 1780)  | 0.45 (0.26 to 0.63) | 86 (41 to 149)   | 0.04 (0.02 to 0.07) | 231 (96 to 433)    | 0.07 (0.03 to 0.13) |
|                             | Female | 202 (137 to 273)       | 0.07 (0.05 to 0.09) | 28 (12 to 47)       | 0.01 (0 to 0.01)    | 4 (2 to 6)       | 0 (0 to 0)          | 34 (14 to 65)      | 0.01 (0 to 0.02)    |
| Central Sub-Saharan Africa  | Both   | 271 (188 to 371)       | 0.5 (0.35 to 0.67)  | 109 (48 to 178)     | 0.2 (0.09 to 0.32)  | 8 (3 to 40)      | 0.02 (0.01 to 0.09) | 22 (9 to 43)       | 0.03 (0.01 to 0.07) |
|                             | Male   | 263 (182 to 359)       | 1.1 (0.77 to 1.47)  | 100 (45 to 162)     | 0.41 (0.18 to 0.65) | 7 (2 to 38)      | 0.04 (0.01 to 0.22) | 19 (7 to 37)       | 0.06 (0.02 to 0.12) |
|                             | Female | 8 (5 to 13)            | 0.03 (0.02 to 0.04) | 9 (3 to 17)         | 0.03 (0.01 to 0.06) | 2 (0 to 3)       | 0.01 (0 to 0.01)    | 4 (1 to 7)         | 0.01 (0 to 0.02)    |
| Eastern sub-Saharan Africa  | Both   | 744 (524 to 1000)      | 0.45 (0.32 to 0.61) | 364 (197 to 531)    | 0.21 (0.11 to 0.31) | 25 (8 to 112)    | 0.02 (0.01 to 0.08) | 83 (34 to 155)     | 0.04 (0.02 to 0.08) |
|                             | Male   | 696 (493 to 941)       | 0.89 (0.64 to 1.18) | 332 (180 to 484)    | 0.4 (0.22 to 0.59)  | 20 (5 to 106)    | 0.03 (0.01 to 0.17) | 67 (27 to 126)     | 0.07 (0.03 to 0.13) |
|                             | Female | 48 (28 to 71)          | 0.06 (0.04 to 0.09) | 32 (15 to 49)       | 0.04 (0.02 to 0.05) | 5 (1 to 10)      | 0.01 (0 to 0.01)    | 17 (7 to 31)       | 0.02 (0.01 to 0.03) |
| Southern sub-Saharan Africa | Both   | 511 (415 to 600)       | 0.89 (0.73 to 1.04) | 214 (127 to 292)    | 0.36 (0.21 to 0.49) | 58 (32 to 87)    | 0.11 (0.06 to 0.17) | 14 (6 to 27)       | 0.02 (0.01 to 0.04) |
|                             | Male   | 470 (383 to 550)       | 1.97 (1.62 to 2.3)  | 200 (120 to 274)    | 0.81 (0.48 to 1.1)  | 55 (29 to 83)    | 0.28 (0.15 to 0.42) | 12 (5 to 24)       | 0.04 (0.02 to 0.08) |
|                             | Female | 41 (30 to 52)          | 0.13 (0.09 to 0.16) | 13 (7 to 20)        | 0.04 (0.02 to 0.06) | 4 (1 to 6)       | 0.01 (0 to 0.02)    | 2 (1 to 4)         | 0.01 (0 to 0.01)    |



|                            |        |                  |                     |                  |                     |              |                     |                |                     |
|----------------------------|--------|------------------|---------------------|------------------|---------------------|--------------|---------------------|----------------|---------------------|
| Western sub-Saharan Africa | Both   | 716 (502 to 959) | 0.39 (0.27 to 0.51) | 443 (247 to 651) | 0.23 (0.13 to 0.34) | 14 (6 to 31) | 0.01 (0 to 0.02)    | 57 (23 to 107) | 0.03 (0.01 to 0.05) |
|                            | Male   | 704 (492 to 944) | 0.8 (0.56 to 1.05)  | 430 (241 to 633) | 0.48 (0.27 to 0.7)  | 13 (6 to 30) | 0.02 (0.01 to 0.04) | 52 (21 to 99)  | 0.05 (0.02 to 0.09) |
|                            | Female | 12 (7 to 17)     | 0.01 (0.01 to 0.02) | 13 (6 to 22)     | 0.01 (0.01 to 0.02) | 1 (0 to 1)   | 0 (0 to 0)          | 4 (2 to 8)     | 0 (0 to 0.01)       |
| Afghanistan                | Both   | 192 (120 to 275) | 1.55 (1 to 2.15)    | 2 (0 to 5)       | 0.01 (0 to 0.03)    | 2 (0 to 9)   | 0.02 (0.01 to 0.1)  | 14 (5 to 27)   | 0.09 (0.03 to 0.16) |
|                            | Male   | 178 (110 to 257) | 3.07 (1.96 to 4.33) | 2 (0 to 5)       | 0.02 (0 to 0.06)    | 2 (0 to 8)   | 0.04 (0.01 to 0.19) | 12 (4 to 24)   | 0.16 (0.06 to 0.3)  |
|                            | Female | 14 (7 to 23)     | 0.18 (0.1 to 0.29)  | 0 (0 to 0)       | 0 (0 to 0)          | 0 (0 to 2)   | 0.01 (0 to 0.02)    | 2 (1 to 4)     | 0.02 (0.01 to 0.04) |
| Albania                    | Both   | 73 (52 to 99)    | 1.68 (1.21 to 2.28) | 19 (9 to 30)     | 0.44 (0.21 to 0.71) | 1 (0 to 2)   | 0.02 (0.01 to 0.05) | 1 (0 to 3)     | 0.03 (0.01 to 0.08) |
|                            | Male   | 68 (49 to 93)    | 3.35 (2.4 to 4.56)  | 18 (9 to 29)     | 0.91 (0.43 to 1.44) | 1 (0 to 2)   | 0.03 (0.01 to 0.1)  | 1 (0 to 3)     | 0.06 (0.01 to 0.14) |
|                            | Female | 4 (3 to 6)       | 0.2 (0.13 to 0.28)  | 0 (0 to 1)       | 0.02 (0.01 to 0.04) | 0 (0 to 0)   | 0.01 (0 to 0.01)    | 0 (0 to 0)     | 0.01 (0 to 0.02)    |
| Algeria                    | Both   | 323 (245 to 421) | 1.04 (0.79 to 1.34) | 18 (8 to 33)     | 0.05 (0.02 to 0.09) | 1 (0 to 5)   | 0.01 (0 to 0.02)    | 10 (4 to 19)   | 0.03 (0.01 to 0.05) |
|                            | Male   | 317 (241 to 413) | 1.95 (1.49 to 2.53) | 18 (8 to 33)     | 0.1 (0.04 to 0.18)  | 1 (0 to 5)   | 0.01 (0 to 0.04)    | 9 (4 to 19)    | 0.05 (0.02 to 0.1)  |
|                            | Female | 6 (4 to 9)       | 0.04 (0.02 to 0.06) | 0 (0 to 1)       | 0 (0 to 0)          | 0 (0 to 0)   | 0 (0 to 0)          | 0 (0 to 1)     | 0 (0 to 0)          |
| American Samoa             | Both   | 0 (0 to 0)       | 0.35 (0.27 to 0.44) | 0 (0 to 0)       | 0.02 (0 to 0.05)    | 0 (0 to 0)   | 0.02 (0.01 to 0.03) | 0 (0 to 0)     | 0.01 (0 to 0.02)    |
|                            | Male   | 0 (0 to 0)       | 0.71 (0.55 to 0.88) | 0 (0 to 0)       | 0.04 (-0.01 to 0.1) | 0 (0 to 0)   | 0.04 (0.02 to 0.06) | 0 (0 to 0)     | 0.02 (0.01 to 0.03) |
|                            | Female | 0 (0 to 0)       | 0.04 (0.03 to 0.06) | 0 (0 to 0)       | 0 (0 to 0)          | 0 (0 to 0)   | 0 (0 to 0)          | 0 (0 to 0)     | 0 (0 to 0.01)       |
| Andorra                    | Both   | 1 (1 to 1)       | 0.74 (0.54 to 0.97) | 1 (0 to 1)       | 0.36 (0.2 to 0.51)  | 0 (0 to 0)   | 0.15 (0.08 to 0.26) | 0 (0 to 0)     | 0.02 (0.01 to 0.05) |
|                            | Male   | 1 (1 to 1)       | 1.42 (1.03 to 1.86) | 0 (0 to 1)       | 0.69 (0.39 to 0.98) | 0 (0 to 0)   | 0.31 (0.15 to 0.52) | 0 (0 to 0)     | 0.04 (0.01 to 0.1)  |
|                            | Female | 0 (0 to 0)       | 0.05 (0.03 to 0.07) | 0 (0 to 0)       | 0.02 (0.01 to 0.03) | 0 (0 to 0)   | 0 (0 to 0.01)       | 0 (0 to 0)     | 0 (0 to 0)          |
| Angola                     | Both   | 94 (67 to 128)   | 0.85 (0.62 to 1.13) | 48 (26 to 71)    | 0.42 (0.23 to 0.61) | 2 (1 to 10)  | 0.03 (0.01 to 0.11) | 6 (2 to 11)    | 0.04 (0.02 to 0.08) |
|                            | Male   | 91 (65 to 124)   | 1.86 (1.36 to 2.52) | 44 (24 to 65)    | 0.87 (0.48 to 1.28) | 2 (0 to 10)  | 0.05 (0.01 to 0.26) | 5 (2 to 10)    | 0.08 (0.03 to 0.16) |
|                            | Female | 3 (2 to 5)       | 0.05 (0.03 to 0.08) | 4 (2 to 6)       | 0.06 (0.03 to 0.1)  | 0 (0 to 1)   | 0.01 (0 to 0.01)    | 1 (0 to 1)     | 0.01 (0 to 0.02)    |

|                     |        |                  |                     |                  |                     |               |                     |               |                     |
|---------------------|--------|------------------|---------------------|------------------|---------------------|---------------|---------------------|---------------|---------------------|
| Antigua and Barbuda | Both   | 1 (1 to 1)       | 0.89 (0.66 to 1.14) | 0 (0 to 1)       | 0.34 (0.18 to 0.5)  | 0 (0 to 0)    | 0.02 (0.01 to 0.03) | 0 (0 to 0)    | 0.05 (0.02 to 0.1)  |
|                     | Male   | 1 (1 to 1)       | 1.88 (1.4 to 2.42)  | 0 (0 to 1)       | 0.71 (0.38 to 1.05) | 0 (0 to 0)    | 0.04 (0.02 to 0.06) | 0 (0 to 0)    | 0.11 (0.04 to 0.19) |
|                     | Female | 0 (0 to 0)       | 0.02 (0.01 to 0.03) | 0 (0 to 0)       | 0.01 (0 to 0.01)    | 0 (0 to 0)    | 0 (0 to 0)          | 0 (0 to 0)    | 0 (0 to 0)          |
| Argentina           | Both   | 691 (568 to 811) | 1.3 (1.07 to 1.52)  | 337 (210 to 455) | 0.63 (0.4 to 0.85)  | 45 (23 to 72) | 0.08 (0.04 to 0.13) | 36 (15 to 66) | 0.07 (0.03 to 0.13) |
|                     | Male   | 618 (506 to 729) | 2.59 (2.11 to 3.06) | 313 (197 to 417) | 1.32 (0.83 to 1.76) | 42 (20 to 68) | 0.18 (0.09 to 0.3)  | 33 (13 to 60) | 0.14 (0.05 to 0.25) |
|                     | Female | 73 (55 to 91)    | 0.25 (0.19 to 0.3)  | 24 (12 to 38)    | 0.08 (0.04 to 0.13) | 3 (1 to 6)    | 0.01 (0 to 0.02)    | 3 (1 to 6)    | 0.01 (0 to 0.02)    |
| Armenia             | Both   | 85 (69 to 104)   | 2 (1.62 to 2.43)    | 15 (7 to 25)     | 0.36 (0.16 to 0.57) | 4 (2 to 7)    | 0.09 (0.05 to 0.16) | 4 (2 to 7)    | 0.09 (0.04 to 0.16) |
|                     | Male   | 84 (68 to 103)   | 4.63 (3.76 to 5.61) | 15 (6 to 24)     | 0.77 (0.34 to 1.24) | 3 (2 to 6)    | 0.2 (0.1 to 0.35)   | 4 (1 to 7)    | 0.19 (0.07 to 0.35) |
|                     | Female | 1 (1 to 1)       | 0.04 (0.02 to 0.06) | 1 (0 to 1)       | 0.03 (0.02 to 0.06) | 1 (0 to 1)    | 0.02 (0.01 to 0.04) | 0 (0 to 0)    | 0.01 (0 to 0.02)    |
| Australia           | Both   | 122 (92 to 150)  | 0.3 (0.23 to 0.36)  | 87 (53 to 117)   | 0.21 (0.13 to 0.28) | 48 (27 to 70) | 0.11 (0.06 to 0.15) | 6 (1 to 13)   | 0.01 (0 to 0.03)    |
|                     | Male   | 107 (81 to 132)  | 0.55 (0.42 to 0.68) | 81 (50 to 107)   | 0.42 (0.26 to 0.55) | 46 (26 to 66) | 0.22 (0.12 to 0.32) | 5 (1 to 12)   | 0.03 (0.01 to 0.06) |
|                     | Female | 15 (11 to 19)    | 0.07 (0.05 to 0.09) | 6 (3 to 10)      | 0.03 (0.01 to 0.04) | 2 (1 to 4)    | 0.01 (0 to 0.01)    | 1 (0 to 1)    | 0 (0 to 0.01)       |
| Austria             | Both   | 107 (92 to 122)  | 0.65 (0.56 to 0.74) | 51 (31 to 67)    | 0.31 (0.19 to 0.41) | 11 (6 to 18)  | 0.06 (0.03 to 0.09) | 3 (1 to 8)    | 0.02 (0.01 to 0.05) |
|                     | Male   | 97 (83 to 110)   | 1.27 (1.09 to 1.45) | 47 (29 to 62)    | 0.62 (0.38 to 0.82) | 11 (6 to 17)  | 0.14 (0.07 to 0.21) | 3 (1 to 7)    | 0.04 (0.01 to 0.1)  |
|                     | Female | 10 (8 to 13)     | 0.12 (0.09 to 0.15) | 4 (2 to 6)       | 0.04 (0.02 to 0.06) | 0 (0 to 1)    | 0 (0 to 0.01)       | 0 (0 to 1)    | 0 (0 to 0.01)       |
| Azerbaijan          | Both   | 170 (126 to 235) | 1.7 (1.26 to 2.31)  | 57 (31 to 87)    | 0.55 (0.29 to 0.83) | 1 (0 to 2)    | 0.02 (0.01 to 0.03) | 8 (3 to 15)   | 0.06 (0.02 to 0.13) |
|                     | Male   | 169 (124 to 234) | 3.8 (2.82 to 5.16)  | 54 (30 to 82)    | 1.14 (0.62 to 1.73) | 1 (0 to 2)    | 0.03 (0.01 to 0.06) | 7 (2 to 13)   | 0.12 (0.04 to 0.23) |
|                     | Female | 2 (1 to 3)       | 0.03 (0.02 to 0.05) | 3 (1 to 7)       | 0.06 (0.02 to 0.12) | 0 (0 to 1)    | 0.01 (0 to 0.01)    | 1 (0 to 2)    | 0.02 (0.01 to 0.04) |
| Bahamas             | Both   | 5 (4 to 7)       | 1.26 (0.91 to 1.7)  | 2 (1 to 3)       | 0.46 (0.14 to 0.77) | 0 (0 to 0)    | 0.06 (0.03 to 0.1)  | 0 (0 to 1)    | 0.07 (0.03 to 0.13) |
|                     | Male   | 5 (3 to 6)       | 2.73 (1.98 to 3.64) | 2 (1 to 3)       | 0.98 (0.3 to 1.64)  | 0 (0 to 0)    | 0.13 (0.06 to 0.24) | 0 (0 to 1)    | 0.14 (0.05 to 0.27) |
|                     | Female | 0 (0 to 0)       | 0.08 (0.05 to 0.12) | 0 (0 to 0)       | 0.02 (0 to 0.04)    | 0 (0 to 0)    | 0 (0 to 0)          | 0 (0 to 0)    | 0.01 (0 to 0.02)    |

|            |        |                     |                     |                 |                     |               |                     |                 |                     |
|------------|--------|---------------------|---------------------|-----------------|---------------------|---------------|---------------------|-----------------|---------------------|
| Bahrain    | Both   | 6 (4 to 7)          | 0.9 (0.62 to 1.19)  | 0 (0 to 1)      | 0.04 (0.02 to 0.08) | 0 (0 to 1)    | 0.11 (0.04 to 0.21) | 0 (0 to 0)      | 0.02 (0.01 to 0.04) |
|            | Male   | 5 (4 to 7)          | 1.69 (1.14 to 2.25) | 0 (0 to 1)      | 0.07 (0.03 to 0.13) | 0 (0 to 1)    | 0.23 (0.07 to 0.42) | 0 (0 to 0)      | 0.03 (0.01 to 0.06) |
|            | Female | 0 (0 to 0)          | 0.04 (0.03 to 0.06) | 0 (0 to 0)      | 0 (0 to 0)          | 0 (0 to 0)    | 0 (0 to 0)          | 0 (0 to 0)      | 0 (0 to 0)          |
| Bangladesh | Both   | 1850 (1310 to 2770) | 1.44 (1.03 to 2.13) | 54 (4 to 117)   | 0.04 (0 to 0.09)    | 22 (8 to 61)  | 0.02 (0.01 to 0.05) | 109 (41 to 220) | 0.08 (0.03 to 0.16) |
|            | Male   | 1820 (1280 to 2710) | 2.71 (1.93 to 4.01) | 53 (4 to 114)   | 0.08 (0.01 to 0.17) | 20 (6 to 59)  | 0.03 (0.01 to 0.09) | 99 (37 to 204)  | 0.14 (0.05 to 0.29) |
|            | Female | 39 (21 to 62)       | 0.06 (0.03 to 0.1)  | 2 (0 to 4)      | 0 (0 to 0.01)       | 2 (1 to 5)    | 0 (0 to 0.01)       | 9 (4 to 19)     | 0.01 (0.01 to 0.03) |
| Barbados   | Both   | 4 (3 to 5)          | 0.72 (0.54 to 0.91) | 2 (1 to 3)      | 0.36 (0.21 to 0.51) | 0 (0 to 0)    | 0.03 (0.01 to 0.05) | 0 (0 to 0)      | 0.04 (0.02 to 0.08) |
|            | Male   | 4 (3 to 4)          | 1.57 (1.19 to 1.98) | 2 (1 to 2)      | 0.78 (0.45 to 1.09) | 0 (0 to 0)    | 0.07 (0.03 to 0.12) | 0 (0 to 0)      | 0.09 (0.03 to 0.16) |
|            | Female | 0 (0 to 0)          | 0.03 (0.02 to 0.05) | 0 (0 to 0)      | 0.02 (0.01 to 0.04) | 0 (0 to 0)    | 0 (0 to 0)          | 0 (0 to 0)      | 0.01 (0 to 0.02)    |
| Belarus    | Both   | 287 (215 to 383)    | 1.82 (1.37 to 2.42) | 136 (82 to 197) | 0.87 (0.52 to 1.26) | 4 (2 to 7)    | 0.02 (0.01 to 0.04) | 7 (2 to 18)     | 0.05 (0.01 to 0.11) |
|            | Male   | 284 (214 to 380)    | 4.47 (3.38 to 5.95) | 135 (81 to 194) | 2.1 (1.27 to 3.04)  | 3 (1 to 7)    | 0.06 (0.02 to 0.11) | 7 (1 to 17)     | 0.1 (0.02 to 0.25)  |
|            | Female | 2 (1 to 4)          | 0.03 (0.02 to 0.04) | 2 (1 to 3)      | 0.02 (0.01 to 0.03) | 0 (0 to 1)    | 0 (0 to 0.01)       | 0 (0 to 1)      | 0 (0 to 0.01)       |
| Belgium    | Both   | 176 (146 to 202)    | 0.83 (0.7 to 0.95)  | 85 (53 to 113)  | 0.4 (0.25 to 0.54)  | 35 (21 to 51) | 0.14 (0.08 to 0.21) | 5 (1 to 10)     | 0.02 (0.01 to 0.05) |
|            | Male   | 154 (127 to 178)    | 1.56 (1.3 to 1.79)  | 76 (47 to 100)  | 0.77 (0.48 to 1.02) | 34 (19 to 50) | 0.32 (0.18 to 0.47) | 4 (1 to 9)      | 0.04 (0.01 to 0.1)  |
|            | Female | 22 (17 to 27)       | 0.2 (0.16 to 0.24)  | 9 (5 to 14)     | 0.08 (0.05 to 0.12) | 1 (1 to 2)    | 0.01 (0 to 0.02)    | 0 (0 to 1)      | 0.01 (0 to 0.01)    |
| Belize     | Both   | 3 (2 to 3)          | 1 (0.79 to 1.24)    | 1 (1 to 1)      | 0.35 (0.19 to 0.51) | 0 (0 to 0)    | 0.08 (0.04 to 0.13) | 0 (0 to 0)      | 0.07 (0.03 to 0.13) |
|            | Male   | 3 (2 to 3)          | 1.92 (1.52 to 2.36) | 1 (1 to 1)      | 0.68 (0.38 to 0.99) | 0 (0 to 0)    | 0.15 (0.07 to 0.25) | 0 (0 to 0)      | 0.13 (0.05 to 0.24) |
|            | Female | 0 (0 to 0)          | 0.06 (0.04 to 0.09) | 0 (0 to 0)      | 0.01 (0 to 0.02)    | 0 (0 to 0)    | 0 (0 to 0.01)       | 0 (0 to 0)      | 0.01 (0 to 0.01)    |
| Benin      | Both   | 20 (13 to 28)       | 0.43 (0.29 to 0.6)  | 8 (3 to 13)     | 0.16 (0.07 to 0.26) | 0 (0 to 1)    | 0.01 (0 to 0.02)    | 2 (1 to 3)      | 0.03 (0.01 to 0.06) |
|            | Male   | 20 (13 to 27)       | 0.92 (0.62 to 1.27) | 7 (3 to 12)     | 0.32 (0.14 to 0.54) | 0 (0 to 1)    | 0.02 (0.01 to 0.05) | 2 (1 to 3)      | 0.06 (0.02 to 0.12) |
|            | Female | 0 (0 to 1)          | 0.01 (0.01 to 0.02) | 0 (0 to 1)      | 0.01 (0 to 0.03)    | 0 (0 to 0)    | 0 (0 to 0)          | 0 (0 to 0)      | 0.01 (0 to 0.01)    |

|                        |        |                     |                     |                    |                      |                 |                     |                 |                     |
|------------------------|--------|---------------------|---------------------|--------------------|----------------------|-----------------|---------------------|-----------------|---------------------|
| Bermuda                | Both   | 1 (1 to 1)          | 0.89 (0.64 to 1.15) | 1 (0 to 1)         | 0.42 (0.23 to 0.61)  | 0 (0 to 0)      | 0.11 (0.05 to 0.17) | 0 (0 to 0)      | 0.05 (0.02 to 0.09) |
|                        | Male   | 1 (1 to 1)          | 1.92 (1.38 to 2.46) | 1 (0 to 1)         | 0.91 (0.5 to 1.32)   | 0 (0 to 0)      | 0.26 (0.13 to 0.41) | 0 (0 to 0)      | 0.1 (0.04 to 0.19)  |
|                        | Female | 0 (0 to 0)          | 0.06 (0.04 to 0.09) | 0 (0 to 0)         | 0.02 (0.01 to 0.03)  | 0 (0 to 0)      | 0 (0 to 0)          | 0 (0 to 0)      | 0 (0 to 0.01)       |
| Bhutan                 | Both   | 6 (4 to 9)          | 1.08 (0.67 to 1.62) | 1 (0 to 1)         | 0.12 (0.03 to 0.24)  | 0 (0 to 0)      | 0.05 (0.02 to 0.09) | 0 (0 to 1)      | 0.06 (0.02 to 0.13) |
|                        | Male   | 5 (3 to 8)          | 1.99 (1.23 to 2.99) | 1 (0 to 1)         | 0.23 (0.06 to 0.46)  | 0 (0 to 0)      | 0.09 (0.03 to 0.16) | 0 (0 to 1)      | 0.1 (0.04 to 0.2)   |
|                        | Female | 0 (0 to 1)          | 0.14 (0.08 to 0.22) | 0 (0 to 0)         | 0 (0 to 0.01)        | 0 (0 to 0)      | 0.01 (0 to 0.02)    | 0 (0 to 0)      | 0.03 (0.01 to 0.06) |
| Bolivia                | Both   | 44 (29 to 63)       | 0.52 (0.35 to 0.75) | 16 (7 to 28)       | 0.18 (0.07 to 0.31)  | 5 (2 to 9)      | 0.07 (0.03 to 0.12) | 4 (2 to 9)      | 0.05 (0.02 to 0.09) |
|                        | Male   | 42 (28 to 60)       | 1.05 (0.7 to 1.51)  | 15 (7 to 25)       | 0.36 (0.15 to 0.61)  | 5 (2 to 9)      | 0.13 (0.05 to 0.26) | 4 (1 to 7)      | 0.08 (0.03 to 0.16) |
|                        | Female | 2 (1 to 4)          | 0.05 (0.02 to 0.08) | 1 (0 to 2)         | 0.02 (0 to 0.05)     | 0 (0 to 1)      | 0.01 (0 to 0.02)    | 1 (0 to 2)      | 0.02 (0.01 to 0.03) |
| Bosnia and Herzegovina | Both   | 128 (99 to 165)     | 2.12 (1.63 to 2.73) | 41 (23 to 60)      | 0.68 (0.38 to 1)     | 3 (1 to 5)      | 0.04 (0.02 to 0.08) | 3 (1 to 6)      | 0.04 (0.01 to 0.1)  |
|                        | Male   | 118 (90 to 153)     | 4.4 (3.39 to 5.67)  | 40 (23 to 59)      | 1.48 (0.83 to 2.18)  | 3 (1 to 5)      | 0.1 (0.04 to 0.19)  | 2 (1 to 6)      | 0.08 (0.02 to 0.2)  |
|                        | Female | 10 (7 to 13)        | 0.3 (0.22 to 0.4)   | 1 (0 to 2)         | 0.03 (0.01 to 0.05)  | 0 (0 to 0)      | 0 (0 to 0)          | 0 (0 to 0)      | 0.01 (0 to 0.01)    |
| Botswana               | Both   | 18 (12 to 25)       | 1.29 (0.91 to 1.8)  | 7 (4 to 11)        | 0.46 (0.24 to 0.72)  | 2 (1 to 4)      | 0.18 (0.08 to 0.33) | 1 (0 to 1)      | 0.03 (0.01 to 0.06) |
|                        | Male   | 17 (11 to 24)       | 2.85 (2.04 to 3.97) | 6 (3 to 10)        | 1.03 (0.54 to 1.6)   | 2 (1 to 4)      | 0.46 (0.2 to 0.81)  | 0 (0 to 1)      | 0.06 (0.02 to 0.12) |
|                        | Female | 1 (1 to 2)          | 0.17 (0.1 to 0.27)  | 0 (0 to 1)         | 0.04 (0.01 to 0.07)  | 0 (0 to 0)      | 0.01 (0 to 0.03)    | 0 (0 to 0)      | 0.01 (0 to 0.02)    |
| Brazil                 | Both   | 3130 (2570 to 3670) | 1.3 (1.06 to 1.53)  | 1160 (659 to 1590) | 0.47 (0.27 to 0.65)  | 151 (85 to 231) | 0.07 (0.04 to 0.1)  | 196 (82 to 363) | 0.08 (0.03 to 0.15) |
|                        | Male   | 2830 (2330 to 3300) | 2.61 (2.13 to 3.06) | 1110 (638 to 1530) | 0.99 (0.57 to 1.37)  | 132 (68 to 209) | 0.13 (0.07 to 0.21) | 178 (74 to 328) | 0.15 (0.06 to 0.28) |
|                        | Female | 303 (222 to 383)    | 0.23 (0.17 to 0.29) | 48 (20 to 78)      | 0.04 (0.02 to 0.06)  | 19 (9 to 32)    | 0.01 (0.01 to 0.02) | 18 (7 to 34)    | 0.01 (0.01 to 0.03) |
| Brunei                 | Both   | 2 (1 to 2)          | 0.73 (0.57 to 0.92) | 0 (0 to 0)         | 0.01 (-0.01 to 0.04) | 0 (0 to 0)      | 0.05 (0.03 to 0.09) | 0 (0 to 0)      | 0.01 (0 to 0.03)    |
|                        | Male   | 2 (1 to 2)          | 1.61 (1.22 to 2.05) | 0 (0 to 0)         | 0.02 (-0.02 to 0.09) | 0 (0 to 0)      | 0.15 (0.07 to 0.26) | 0 (0 to 0)      | 0.03 (0.01 to 0.06) |
|                        | Female | 0 (0 to 0)          | 0.18 (0.12 to 0.25) | 0 (0 to 0)         | 0 (0 to 0.01)        | 0 (0 to 0)      | 0.01 (0 to 0.02)    | 0 (0 to 0)      | 0 (0 to 0.01)       |

|              |        |                  |                     |                 |                     |                |                     |              |                     |
|--------------|--------|------------------|---------------------|-----------------|---------------------|----------------|---------------------|--------------|---------------------|
| Bulgaria     | Both   | 312 (234 to 401) | 2.41 (1.78 to 3.1)  | 154 (92 to 215) | 1.19 (0.71 to 1.66) | 3 (1 to 5)     | 0.02 (0.01 to 0.03) | 9 (2 to 21)  | 0.08 (0.02 to 0.18) |
|              | Male   | 302 (226 to 387) | 5.06 (3.77 to 6.5)  | 150 (90 to 210) | 2.53 (1.5 to 3.53)  | 2 (1 to 5)     | 0.04 (0.02 to 0.07) | 9 (2 to 20)  | 0.15 (0.03 to 0.35) |
|              | Female | 10 (7 to 14)     | 0.15 (0.11 to 0.21) | 3 (2 to 6)      | 0.05 (0.02 to 0.08) | 0 (0 to 0)     | 0 (0 to 0)          | 1 (0 to 1)   | 0.01 (0 to 0.02)    |
| Burkina Faso | Both   | 32 (19 to 49)    | 0.35 (0.21 to 0.52) | 32 (16 to 50)   | 0.36 (0.18 to 0.56) | 1 (0 to 2)     | 0.01 (0 to 0.02)    | 3 (1 to 6)   | 0.03 (0.01 to 0.06) |
|              | Male   | 32 (19 to 48)    | 0.77 (0.46 to 1.14) | 30 (15 to 47)   | 0.75 (0.37 to 1.15) | 1 (0 to 2)     | 0.02 (0.01 to 0.05) | 3 (1 to 6)   | 0.06 (0.02 to 0.12) |
|              | Female | 0 (0 to 1)       | 0.01 (0 to 0.01)    | 2 (1 to 4)      | 0.05 (0.02 to 0.08) | 0 (0 to 0)     | 0 (0 to 0)          | 0 (0 to 1)   | 0.01 (0 to 0.01)    |
| Burundi      | Both   | 27 (16 to 42)    | 0.57 (0.34 to 0.85) | 18 (9 to 29)    | 0.37 (0.19 to 0.58) | 1 (0 to 3)     | 0.02 (0 to 0.09)    | 3 (1 to 7)   | 0.06 (0.02 to 0.12) |
|              | Male   | 26 (16 to 40)    | 1.05 (0.64 to 1.56) | 17 (9 to 28)    | 0.67 (0.34 to 1.06) | 1 (0 to 3)     | 0.03 (0 to 0.17)    | 3 (1 to 5)   | 0.08 (0.03 to 0.17) |
|              | Female | 1 (0 to 2)       | 0.05 (0.02 to 0.08) | 1 (0 to 2)      | 0.04 (0.02 to 0.07) | 0 (0 to 0)     | 0.01 (0 to 0.02)    | 1 (0 to 2)   | 0.03 (0.01 to 0.06) |
| Cabo Verde   | Both   | 2 (1 to 3)       | 0.46 (0.32 to 0.62) | 1 (1 to 2)      | 0.27 (0.15 to 0.4)  | 0 (0 to 0)     | 0.01 (0 to 0.01)    | 0 (0 to 0)   | 0.02 (0.01 to 0.04) |
|              | Male   | 2 (1 to 3)       | 1.07 (0.75 to 1.46) | 1 (1 to 2)      | 0.61 (0.34 to 0.9)  | 0 (0 to 0)     | 0.02 (0.01 to 0.04) | 0 (0 to 0)   | 0.04 (0.01 to 0.08) |
|              | Female | 0 (0 to 0)       | 0.02 (0.01 to 0.03) | 0 (0 to 0)      | 0.02 (0.01 to 0.03) | 0 (0 to 0)     | 0 (0 to 0)          | 0 (0 to 0)   | 0 (0 to 0)          |
| Cambodia     | Both   | 137 (101 to 182) | 1.22 (0.89 to 1.63) | 45 (24 to 69)   | 0.38 (0.19 to 0.58) | 3 (1 to 6)     | 0.03 (0.01 to 0.06) | 8 (3 to 15)  | 0.06 (0.02 to 0.11) |
|              | Male   | 129 (93 to 174)  | 2.86 (2.08 to 3.89) | 43 (23 to 65)   | 0.89 (0.46 to 1.34) | 3 (1 to 6)     | 0.08 (0.03 to 0.15) | 6 (2 to 12)  | 0.1 (0.04 to 0.21)  |
|              | Female | 8 (5 to 12)      | 0.13 (0.08 to 0.19) | 2 (1 to 4)      | 0.03 (0.01 to 0.05) | 0 (0 to 0)     | 0 (0 to 0.01)       | 2 (1 to 3)   | 0.02 (0.01 to 0.04) |
| Cameroon     | Both   | 69 (44 to 102)   | 0.57 (0.36 to 0.84) | 44 (24 to 67)   | 0.37 (0.2 to 0.56)  | 2 (1 to 4)     | 0.02 (0.01 to 0.04) | 5 (2 to 10)  | 0.04 (0.01 to 0.07) |
|              | Male   | 68 (43 to 101)   | 1.17 (0.75 to 1.71) | 42 (22 to 64)   | 0.73 (0.4 to 1.12)  | 2 (1 to 4)     | 0.04 (0.02 to 0.09) | 5 (2 to 9)   | 0.07 (0.03 to 0.14) |
|              | Female | 1 (0 to 1)       | 0.02 (0.01 to 0.03) | 2 (1 to 3)      | 0.03 (0.01 to 0.06) | 0 (0 to 0)     | 0 (0 to 0)          | 0 (0 to 1)   | 0.01 (0 to 0.01)    |
| Canada       | Both   | 351 (278 to 417) | 0.5 (0.4 to 0.59)   | 134 (77 to 186) | 0.2 (0.11 to 0.27)  | 69 (38 to 100) | 0.09 (0.05 to 0.13) | 12 (3 to 26) | 0.02 (0 to 0.04)    |
|              | Male   | 299 (236 to 356) | 0.93 (0.73 to 1.1)  | 118 (69 to 164) | 0.37 (0.22 to 0.51) | 66 (36 to 97)  | 0.2 (0.11 to 0.3)   | 10 (2 to 22) | 0.03 (0.01 to 0.07) |
|              | Female | 53 (40 to 67)    | 0.14 (0.11 to 0.18) | 15 (7 to 25)    | 0.04 (0.02 to 0.07) | 3 (1 to 5)     | 0.01 (0 to 0.01)    | 2 (0 to 4)   | 0.01 (0 to 0.01)    |

|                         |        |                        |                     |                     |                     |                  |                     |                   |                     |
|-------------------------|--------|------------------------|---------------------|---------------------|---------------------|------------------|---------------------|-------------------|---------------------|
| Central Africa Republic | Both   | 15 (9 to 23)           | 0.65 (0.41 to 0.96) | 5 (1 to 10)         | 0.21 (0.05 to 0.42) | 1 (0 to 2)       | 0.03 (0.01 to 0.11) | 1 (0 to 3)        | 0.05 (0.02 to 0.1)  |
|                         | Male   | 15 (9 to 22)           | 1.42 (0.93 to 2.11) | 5 (1 to 10)         | 0.44 (0.11 to 0.86) | 0 (0 to 2)       | 0.07 (0.02 to 0.26) | 1 (0 to 2)        | 0.09 (0.03 to 0.17) |
|                         | Female | 0 (0 to 1)             | 0.04 (0.02 to 0.06) | 0 (0 to 1)          | 0.03 (0 to 0.07)    | 0 (0 to 0)       | 0.01 (0 to 0.02)    | 0 (0 to 0)        | 0.01 (0 to 0.03)    |
| Chad                    | Both   | 28 (17 to 39)          | 0.52 (0.34 to 0.73) | 9 (3 to 16)         | 0.16 (0.05 to 0.28) | 0 (0 to 1)       | 0.01 (0 to 0.02)    | 2 (1 to 4)        | 0.03 (0.01 to 0.06) |
|                         | Male   | 27 (17 to 38)          | 0.94 (0.61 to 1.32) | 8 (3 to 14)         | 0.27 (0.08 to 0.48) | 0 (0 to 1)       | 0.01 (0 to 0.04)    | 2 (1 to 3)        | 0.05 (0.02 to 0.1)  |
|                         | Female | 1 (0 to 1)             | 0.02 (0.01 to 0.04) | 1 (0 to 1)          | 0.02 (0 to 0.04)    | 0 (0 to 0)       | 0 (0 to 0)          | 0 (0 to 0)        | 0.01 (0 to 0.01)    |
| Chile                   | Both   | 77 (56 to 100)         | 0.32 (0.23 to 0.41) | 53 (32 to 73)       | 0.22 (0.13 to 0.3)  | 7 (4 to 11)      | 0.03 (0.01 to 0.05) | 5 (2 to 9)        | 0.02 (0.01 to 0.04) |
|                         | Male   | 70 (50 to 91)          | 0.64 (0.46 to 0.84) | 49 (30 to 66)       | 0.45 (0.27 to 0.62) | 7 (3 to 11)      | 0.07 (0.03 to 0.11) | 5 (2 to 8)        | 0.04 (0.02 to 0.07) |
|                         | Female | 8 (5 to 10)            | 0.06 (0.04 to 0.08) | 4 (2 to 7)          | 0.03 (0.02 to 0.05) | 0 (0 to 1)       | 0 (0 to 0)          | 1 (0 to 1)        | 0 (0 to 0.01)       |
| China                   | Both   | 15300 (12100 to 18900) | 0.76 (0.6 to 0.93)  | 4680 (2700 to 6860) | 0.23 (0.13 to 0.33) | 229 (121 to 370) | 0.01 (0.01 to 0.02) | 755 (313 to 1460) | 0.03 (0.01 to 0.07) |
|                         | Male   | 14400 (11300 to 17800) | 1.55 (1.23 to 1.9)  | 4540 (2630 to 6680) | 0.47 (0.27 to 0.69) | 190 (89 to 321)  | 0.03 (0.01 to 0.04) | 627 (258 to 1240) | 0.06 (0.02 to 0.11) |
|                         | Female | 957 (632 to 1320)      | 0.09 (0.06 to 0.13) | 137 (58 to 230)     | 0.01 (0.01 to 0.02) | 39 (16 to 66)    | 0 (0 to 0.01)       | 128 (53 to 245)   | 0.01 (0 to 0.02)    |
| Colombia                | Both   | 189 (123 to 276)       | 0.35 (0.23 to 0.52) | 74 (36 to 119)      | 0.14 (0.07 to 0.23) | 9 (4 to 17)      | 0.02 (0.01 to 0.03) | 18 (7 to 33)      | 0.03 (0.01 to 0.06) |
|                         | Male   | 164 (106 to 240)       | 0.68 (0.44 to 1)    | 71 (34 to 111)      | 0.29 (0.14 to 0.46) | 8 (3 to 16)      | 0.03 (0.01 to 0.07) | 15 (6 to 27)      | 0.06 (0.02 to 0.11) |
|                         | Female | 25 (15 to 40)          | 0.09 (0.05 to 0.14) | 4 (1 to 8)          | 0.01 (0 to 0.03)    | 1 (0 to 2)       | 0 (0 to 0.01)       | 3 (1 to 6)        | 0.01 (0 to 0.02)    |
| Comoros                 | Both   | 2 (1 to 3)             | 0.44 (0.3 to 0.63)  | 0 (0 to 0)          | 0.03 (0 to 0.06)    | 0 (0 to 0)       | 0.02 (0 to 0.06)    | 0 (0 to 0)        | 0.03 (0.01 to 0.07) |
|                         | Male   | 2 (1 to 3)             | 0.93 (0.63 to 1.3)  | 0 (0 to 0)          | 0.05 (0 to 0.12)    | 0 (0 to 0)       | 0.03 (0.01 to 0.14) | 0 (0 to 0)        | 0.05 (0.02 to 0.11) |
|                         | Female | 0 (0 to 0)             | 0.05 (0.02 to 0.08) | 0 (0 to 0)          | 0.01 (0 to 0.02)    | 0 (0 to 0)       | 0.01 (0 to 0.02)    | 0 (0 to 0)        | 0.02 (0.01 to 0.03) |
| Congo                   | Both   | 17 (12 to 23)          | 0.69 (0.48 to 0.94) | 8 (3 to 13)         | 0.29 (0.12 to 0.49) | 1 (0 to 2)       | 0.03 (0.01 to 0.12) | 1 (0 to 2)        | 0.03 (0.01 to 0.06) |
|                         | Male   | 17 (11 to 23)          | 1.45 (1.02 to 2)    | 7 (3 to 12)         | 0.55 (0.23 to 0.93) | 1 (0 to 2)       | 0.06 (0.02 to 0.26) | 1 (0 to 2)        | 0.05 (0.02 to 0.1)  |
|                         | Female | 0 (0 to 1)             | 0.02 (0.01 to 0.04) | 1 (0 to 2)          | 0.06 (0.02 to 0.11) | 0 (0 to 0)       | 0.01 (0 to 0.02)    | 0 (0 to 0)        | 0.01 (0 to 0.02)    |

|               |        |                  |                     |                  |                     |               |                     |               |                     |
|---------------|--------|------------------|---------------------|------------------|---------------------|---------------|---------------------|---------------|---------------------|
| Cook Islands  | Both   | 0 (0 to 0)       | 0.29 (0.22 to 0.36) | 0 (0 to 0)       | 0.12 (0.06 to 0.17) | 0 (0 to 0)    | 0.01 (0 to 0.02)    | 0 (0 to 0)    | 0.01 (0 to 0.02)    |
|               | Male   | 0 (0 to 0)       | 0.55 (0.41 to 0.71) | 0 (0 to 0)       | 0.24 (0.12 to 0.35) | 0 (0 to 0)    | 0.02 (0.01 to 0.04) | 0 (0 to 0)    | 0.02 (0.01 to 0.03) |
|               | Female | 0 (0 to 0)       | 0.04 (0.03 to 0.07) | 0 (0 to 0)       | 0 (0 to 0.01)       | 0 (0 to 0)    | 0 (0 to 0)          | 0 (0 to 0)    | 0 (0 to 0.01)       |
| Costa Rica    | Both   | 30 (22 to 41)    | 0.6 (0.42 to 0.8)   | 9 (4 to 14)      | 0.18 (0.08 to 0.28) | 1 (0 to 1)    | 0.01 (0.01 to 0.03) | 2 (1 to 4)    | 0.04 (0.01 to 0.07) |
|               | Male   | 29 (21 to 38)    | 1.25 (0.88 to 1.66) | 9 (4 to 14)      | 0.38 (0.18 to 0.59) | 1 (0 to 1)    | 0.03 (0.01 to 0.06) | 2 (1 to 3)    | 0.07 (0.03 to 0.13) |
|               | Female | 1 (1 to 2)       | 0.05 (0.03 to 0.08) | 0 (0 to 0)       | 0.01 (0 to 0.02)    | 0 (0 to 0)    | 0 (0 to 0)          | 0 (0 to 0)    | 0 (0 to 0.01)       |
| Croatia       | Both   | 156 (120 to 200) | 1.85 (1.42 to 2.39) | 66 (37 to 96)    | 0.79 (0.45 to 1.15) | 21 (10 to 37) | 0.23 (0.11 to 0.4)  | 3 (1 to 8)    | 0.04 (0.01 to 0.1)  |
|               | Male   | 148 (114 to 191) | 3.99 (3.07 to 5.12) | 65 (36 to 94)    | 1.75 (0.99 to 2.54) | 21 (10 to 37) | 0.54 (0.25 to 0.93) | 3 (1 to 7)    | 0.09 (0.02 to 0.2)  |
|               | Female | 8 (6 to 11)      | 0.17 (0.12 to 0.23) | 1 (0 to 3)       | 0.03 (0.01 to 0.06) | 0 (0 to 1)    | 0 (0 to 0.01)       | 0 (0 to 0)    | 0 (0 to 0.01)       |
| Cuba          | Both   | 702 (551 to 883) | 3.68 (2.87 to 4.63) | 187 (100 to 282) | 0.99 (0.53 to 1.5)  | 9 (4 to 17)   | 0.05 (0.02 to 0.08) | 36 (15 to 67) | 0.19 (0.08 to 0.36) |
|               | Male   | 646 (505 to 812) | 7.19 (5.62 to 9.07) | 180 (96 to 271)  | 2.01 (1.07 to 3.03) | 9 (4 to 16)   | 0.1 (0.04 to 0.18)  | 33 (14 to 62) | 0.36 (0.15 to 0.7)  |
|               | Female | 56 (40 to 75)    | 0.55 (0.39 to 0.74) | 7 (3 to 12)      | 0.07 (0.03 to 0.12) | 1 (0 to 1)    | 0.01 (0 to 0.01)    | 3 (1 to 6)    | 0.03 (0.01 to 0.07) |
| Cyprus        | Both   | 12 (10 to 15)    | 0.63 (0.5 to 0.77)  | 5 (3 to 7)       | 0.27 (0.16 to 0.36) | 2 (1 to 3)    | 0.08 (0.04 to 0.13) | 0 (0 to 1)    | 0.01 (0 to 0.03)    |
|               | Male   | 12 (9 to 14)     | 1.29 (1.01 to 1.57) | 5 (3 to 7)       | 0.56 (0.33 to 0.76) | 2 (1 to 3)    | 0.18 (0.09 to 0.29) | 0 (0 to 0)    | 0.02 (0.01 to 0.05) |
|               | Female | 1 (0 to 1)       | 0.06 (0.05 to 0.09) | 0 (0 to 0)       | 0.02 (0.01 to 0.03) | 0 (0 to 0)    | 0 (0 to 0.01)       | 0 (0 to 0)    | 0 (0 to 0)          |
| Czechia       | Both   | 202 (158 to 255) | 1.02 (0.79 to 1.29) | 106 (66 to 149)  | 0.54 (0.34 to 0.76) | 7 (3 to 13)   | 0.03 (0.01 to 0.06) | 7 (2 to 16)   | 0.04 (0.01 to 0.09) |
|               | Male   | 188 (147 to 237) | 2.07 (1.61 to 2.6)  | 100 (63 to 141)  | 1.11 (0.7 to 1.56)  | 7 (3 to 12)   | 0.07 (0.03 to 0.13) | 7 (2 to 15)   | 0.07 (0.02 to 0.17) |
|               | Female | 14 (10 to 19)    | 0.13 (0.09 to 0.17) | 6 (3 to 9)       | 0.05 (0.03 to 0.08) | 0 (0 to 1)    | 0 (0 to 0.01)       | 1 (0 to 1)    | 0.01 (0 to 0.01)    |
| Côte d'Ivoire | Both   | 72 (48 to 98)    | 0.69 (0.46 to 0.94) | 35 (16 to 55)    | 0.32 (0.14 to 0.52) | 1 (0 to 3)    | 0.01 (0.01 to 0.03) | 4 (2 to 8)    | 0.03 (0.01 to 0.07) |
|               | Male   | 70 (47 to 96)    | 1.3 (0.89 to 1.8)   | 33 (16 to 54)    | 0.6 (0.27 to 0.96)  | 1 (0 to 3)    | 0.03 (0.01 to 0.06) | 4 (2 to 8)    | 0.06 (0.02 to 0.12) |
|               | Female | 2 (1 to 3)       | 0.04 (0.02 to 0.06) | 1 (0 to 2)       | 0.02 (0.01 to 0.04) | 0 (0 to 0)    | 0 (0 to 0)          | 0 (0 to 1)    | 0 (0 to 0.01)       |

|                                  |        |                  |                     |               |                      |              |                     |              |                     |
|----------------------------------|--------|------------------|---------------------|---------------|----------------------|--------------|---------------------|--------------|---------------------|
| North Korea                      | Both   | 220 (167 to 285) | 0.67 (0.51 to 0.86) | 61 (31 to 91) | 0.18 (0.09 to 0.28)  | 4 (2 to 6)   | 0.01 (0.01 to 0.02) | 14 (6 to 26) | 0.04 (0.02 to 0.08) |
|                                  | Male   | 207 (157 to 267) | 1.54 (1.2 to 1.97)  | 59 (31 to 89) | 0.42 (0.22 to 0.63)  | 3 (1 to 5)   | 0.02 (0.01 to 0.04) | 11 (4 to 21) | 0.07 (0.03 to 0.14) |
|                                  | Female | 14 (8 to 21)     | 0.07 (0.04 to 0.11) | 2 (0 to 3)    | 0.01 (0 to 0.02)     | 1 (0 to 1)   | 0 (0 to 0.01)       | 3 (1 to 5)   | 0.01 (0.01 to 0.03) |
| Democratic Republic of the Congo | Both   | 136 (81 to 204)  | 0.37 (0.22 to 0.54) | 42 (9 to 86)  | 0.11 (0.02 to 0.23)  | 5 (1 to 23)  | 0.02 (0 to 0.08)    | 14 (5 to 28) | 0.03 (0.01 to 0.06) |
|                                  | Male   | 131 (78 to 197)  | 0.8 (0.49 to 1.19)  | 38 (8 to 78)  | 0.23 (0.05 to 0.46)  | 4 (1 to 22)  | 0.03 (0.01 to 0.2)  | 11 (4 to 22) | 0.05 (0.02 to 0.11) |
|                                  | Female | 4 (2 to 7)       | 0.02 (0.01 to 0.04) | 4 (0 to 9)    | 0.02 (0 to 0.04)     | 1 (0 to 2)   | 0.01 (0 to 0.01)    | 3 (1 to 5)   | 0.01 (0 to 0.02)    |
| Denmark                          | Both   | 78 (66 to 89)    | 0.69 (0.59 to 0.79) | 34 (20 to 46) | 0.3 (0.18 to 0.41)   | 14 (8 to 22) | 0.12 (0.06 to 0.18) | 2 (0 to 5)   | 0.02 (0 to 0.05)    |
|                                  | Male   | 65 (54 to 74)    | 1.23 (1.04 to 1.41) | 29 (17 to 39) | 0.55 (0.33 to 0.75)  | 14 (7 to 21) | 0.24 (0.13 to 0.37) | 2 (0 to 4)   | 0.03 (0.01 to 0.08) |
|                                  | Female | 14 (11 to 17)    | 0.22 (0.18 to 0.27) | 5 (3 to 7)    | 0.08 (0.04 to 0.13)  | 1 (0 to 1)   | 0.01 (0 to 0.02)    | 0 (0 to 1)   | 0.01 (0 to 0.01)    |
| Djibouti                         | Both   | 5 (3 to 7)       | 0.8 (0.54 to 1.19)  | 0 (0 to 1)    | 0.03 (-0.01 to 0.09) | 0 (0 to 0)   | 0.02 (0.01 to 0.09) | 0 (0 to 0)   | 0.03 (0.01 to 0.06) |
|                                  | Male   | 5 (3 to 7)       | 1.43 (0.96 to 2.13) | 0 (0 to 1)    | 0.05 (-0.02 to 0.15) | 0 (0 to 0)   | 0.04 (0.01 to 0.17) | 0 (0 to 0)   | 0.04 (0.02 to 0.09) |
|                                  | Female | 0 (0 to 0)       | 0.08 (0.04 to 0.13) | 0 (0 to 0)    | 0 (0 to 0.01)        | 0 (0 to 0)   | 0.01 (0 to 0.02)    | 0 (0 to 0)   | 0.01 (0 to 0.02)    |
| Dominica                         | Both   | 1 (1 to 1)       | 1.1 (0.76 to 1.51)  | 0 (0 to 1)    | 0.54 (0.28 to 0.8)   | 0 (0 to 0)   | 0.12 (0.05 to 0.2)  | 0 (0 to 0)   | 0.08 (0.03 to 0.15) |
|                                  | Male   | 1 (1 to 1)       | 2.13 (1.48 to 2.93) | 0 (0 to 1)    | 1.04 (0.55 to 1.54)  | 0 (0 to 0)   | 0.26 (0.12 to 0.45) | 0 (0 to 0)   | 0.14 (0.05 to 0.26) |
|                                  | Female | 0 (0 to 0)       | 0.11 (0.07 to 0.17) | 0 (0 to 0)    | 0.05 (0.02 to 0.08)  | 0 (0 to 0)   | 0 (0 to 0)          | 0 (0 to 0)   | 0.01 (0.01 to 0.03) |
| Dominican Republic               | Both   | 125 (92 to 168)  | 1.39 (1.02 to 1.85) | 35 (18 to 54) | 0.37 (0.19 to 0.58)  | 2 (1 to 3)   | 0.02 (0.01 to 0.04) | 7 (3 to 14)  | 0.08 (0.03 to 0.14) |
|                                  | Male   | 106 (77 to 146)  | 2.45 (1.79 to 3.35) | 33 (17 to 51) | 0.72 (0.36 to 1.12)  | 2 (1 to 3)   | 0.04 (0.02 to 0.08) | 7 (3 to 12)  | 0.14 (0.06 to 0.26) |
|                                  | Female | 19 (14 to 27)    | 0.41 (0.3 to 0.57)  | 2 (1 to 4)    | 0.04 (0.02 to 0.07)  | 0 (0 to 0)   | 0 (0 to 0.01)       | 1 (0 to 2)   | 0.02 (0.01 to 0.03) |
| Ecuador                          | Both   | 46 (31 to 63)    | 0.32 (0.22 to 0.43) | 13 (6 to 21)  | 0.08 (0.04 to 0.13)  | 2 (1 to 4)   | 0.02 (0.01 to 0.03) | 4 (1 to 8)   | 0.03 (0.01 to 0.05) |
|                                  | Male   | 43 (29 to 59)    | 0.63 (0.43 to 0.86) | 12 (6 to 20)  | 0.17 (0.08 to 0.27)  | 2 (1 to 3)   | 0.03 (0.01 to 0.06) | 3 (1 to 7)   | 0.04 (0.02 to 0.09) |
|                                  | Female | 3 (2 to 5)       | 0.04 (0.02 to 0.06) | 1 (0 to 1)    | 0.01 (0 to 0.01)     | 0 (0 to 0)   | 0 (0 to 0.01)       | 1 (0 to 1)   | 0.01 (0 to 0.01)    |



|                   |        |                  |                     |               |                     |             |                     |              |                     |
|-------------------|--------|------------------|---------------------|---------------|---------------------|-------------|---------------------|--------------|---------------------|
| Egypt             | Both   | 460 (325 to 655) | 0.71 (0.51 to 1.05) | 13 (3 to 28)  | 0.02 (0 to 0.04)    | 2 (0 to 8)  | 0 (0 to 0.02)       | 22 (8 to 43) | 0.03 (0.01 to 0.06) |
|                   | Male   | 453 (319 to 649) | 1.27 (0.89 to 1.87) | 12 (3 to 27)  | 0.03 (0.01 to 0.07) | 1 (0 to 8)  | 0.01 (0 to 0.03)    | 21 (8 to 42) | 0.05 (0.02 to 0.1)  |
|                   | Female | 7 (4 to 12)      | 0.03 (0.02 to 0.05) | 0 (0 to 1)    | 0 (0 to 0)          | 0 (0 to 1)  | 0 (0 to 0)          | 1 (0 to 2)   | 0 (0 to 0.01)       |
| El Salvador       | Both   | 17 (11 to 25)    | 0.29 (0.19 to 0.42) | 5 (2 to 9)    | 0.09 (0.04 to 0.15) | 0 (0 to 0)  | 0 (0 to 0)          | 2 (1 to 3)   | 0.03 (0.01 to 0.05) |
|                   | Male   | 16 (10 to 22)    | 0.63 (0.41 to 0.9)  | 5 (2 to 8)    | 0.21 (0.09 to 0.33) | 0 (0 to 0)  | 0 (0 to 0.01)       | 1 (1 to 3)   | 0.06 (0.02 to 0.11) |
|                   | Female | 1 (1 to 2)       | 0.04 (0.02 to 0.07) | 0 (0 to 1)    | 0.01 (0 to 0.02)    | 0 (0 to 0)  | 0 (0 to 0)          | 0 (0 to 1)   | 0.01 (0 to 0.02)    |
| Equatorial Guinea | Both   | 2 (1 to 3)       | 0.45 (0.27 to 0.72) | 1 (1 to 2)    | 0.27 (0.14 to 0.45) | 0 (0 to 0)  | 0.02 (0.01 to 0.1)  | 0 (0 to 0)   | 0.02 (0.01 to 0.04) |
|                   | Male   | 2 (1 to 3)       | 1.08 (0.66 to 1.73) | 1 (1 to 2)    | 0.6 (0.29 to 1.01)  | 0 (0 to 0)  | 0.05 (0.01 to 0.24) | 0 (0 to 0)   | 0.04 (0.01 to 0.08) |
|                   | Female | 0 (0 to 0)       | 0.02 (0.01 to 0.04) | 0 (0 to 0)    | 0.05 (0.02 to 0.09) | 0 (0 to 0)  | 0.01 (0 to 0.02)    | 0 (0 to 0)   | 0 (0 to 0.01)       |
| Eritrea           | Both   | 13 (8 to 19)     | 0.41 (0.25 to 0.62) | 3 (1 to 7)    | 0.1 (0.02 to 0.21)  | 1 (0 to 2)  | 0.02 (0.01 to 0.07) | 2 (1 to 4)   | 0.05 (0.02 to 0.11) |
|                   | Male   | 12 (7 to 19)     | 0.95 (0.58 to 1.46) | 3 (1 to 6)    | 0.21 (0.04 to 0.45) | 0 (0 to 2)  | 0.05 (0.01 to 0.17) | 1 (1 to 3)   | 0.09 (0.03 to 0.18) |
|                   | Female | 0 (0 to 0)       | 0.01 (0.01 to 0.02) | 0 (0 to 1)    | 0.02 (0 to 0.04)    | 0 (0 to 0)  | 0.01 (0 to 0.03)    | 0 (0 to 1)   | 0.03 (0.01 to 0.05) |
| Estonia           | Both   | 24 (18 to 31)    | 0.99 (0.74 to 1.3)  | 12 (7 to 18)  | 0.52 (0.31 to 0.75) | 1 (0 to 1)  | 0.02 (0.01 to 0.04) | 0 (0 to 1)   | 0.02 (0.01 to 0.05) |
|                   | Male   | 23 (17 to 30)    | 2.34 (1.74 to 3.05) | 12 (7 to 17)  | 1.24 (0.74 to 1.77) | 1 (0 to 1)  | 0.07 (0.03 to 0.13) | 0 (0 to 1)   | 0.05 (0.01 to 0.11) |
|                   | Female | 1 (1 to 1)       | 0.07 (0.04 to 0.09) | 0 (0 to 1)    | 0.03 (0.01 to 0.04) | 0 (0 to 0)  | 0 (0 to 0)          | 0 (0 to 0)   | 0 (0 to 0.01)       |
| eSwatini          | Both   | 4 (3 to 6)       | 0.72 (0.47 to 1.04) | 3 (2 to 5)    | 0.48 (0.27 to 0.72) | 1 (1 to 2)  | 0.24 (0.1 to 0.41)  | 0 (0 to 0)   | 0.03 (0.01 to 0.07) |
|                   | Male   | 4 (2 to 6)       | 1.63 (1.07 to 2.43) | 3 (2 to 4)    | 1.11 (0.63 to 1.66) | 1 (1 to 2)  | 0.64 (0.28 to 1.1)  | 0 (0 to 0)   | 0.07 (0.02 to 0.14) |
|                   | Female | 0 (0 to 1)       | 0.13 (0.07 to 0.21) | 0 (0 to 0)    | 0.05 (0.02 to 0.09) | 0 (0 to 0)  | 0.01 (0 to 0.03)    | 0 (0 to 0)   | 0.01 (0 to 0.01)    |
| Ethiopia          | Both   | 88 (53 to 135)   | 0.22 (0.13 to 0.33) | 53 (22 to 94) | 0.12 (0.05 to 0.22) | 5 (1 to 24) | 0.01 (0 to 0.07)    | 14 (6 to 27) | 0.03 (0.01 to 0.06) |
|                   | Male   | 87 (52 to 134)   | 0.42 (0.25 to 0.64) | 50 (21 to 88) | 0.23 (0.1 to 0.41)  | 4 (1 to 24) | 0.02 (0 to 0.13)    | 12 (5 to 24) | 0.05 (0.02 to 0.1)  |
|                   | Female | 1 (1 to 2)       | 0.01 (0 to 0.01)    | 4 (1 to 7)    | 0.02 (0 to 0.03)    | 1 (0 to 2)  | 0 (0 to 0.01)       | 2 (1 to 4)   | 0.01 (0 to 0.02)    |

|            |        |                     |                     |                  |                     |                  |                     |              |                     |
|------------|--------|---------------------|---------------------|------------------|---------------------|------------------|---------------------|--------------|---------------------|
| Fiji       | Both   | 3 (2 to 4)          | 0.41 (0.28 to 0.54) | 1 (0 to 1)       | 0.09 (0.04 to 0.14) | 0 (0 to 0)       | 0.03 (0.01 to 0.05) | 0 (0 to 0)   | 0.01 (0.01 to 0.03) |
|            | Male   | 3 (2 to 3)          | 0.9 (0.63 to 1.18)  | 1 (0 to 1)       | 0.2 (0.09 to 0.32)  | 0 (0 to 0)       | 0.07 (0.03 to 0.12) | 0 (0 to 0)   | 0.03 (0.01 to 0.05) |
|            | Female | 0 (0 to 0)          | 0.04 (0.02 to 0.07) | 0 (0 to 0)       | 0 (0 to 0)          | 0 (0 to 0)       | 0 (0 to 0)          | 0 (0 to 0)   | 0 (0 to 0.01)       |
| Finland    | Both   | 28 (22 to 34)       | 0.24 (0.2 to 0.29)  | 13 (8 to 17)     | 0.11 (0.07 to 0.15) | 6 (3 to 9)       | 0.04 (0.02 to 0.07) | 1 (0 to 2)   | 0.01 (0 to 0.02)    |
|            | Male   | 26 (20 to 31)       | 0.48 (0.39 to 0.58) | 12 (7 to 16)     | 0.23 (0.14 to 0.31) | 6 (3 to 9)       | 0.1 (0.05 to 0.16)  | 1 (0 to 2)   | 0.02 (0 to 0.03)    |
|            | Female | 2 (2 to 3)          | 0.04 (0.03 to 0.05) | 1 (0 to 1)       | 0.01 (0.01 to 0.02) | 0 (0 to 0)       | 0 (0 to 0)          | 0 (0 to 0)   | 0 (0 to 0)          |
| France     | Both   | 1230 (1030 to 1440) | 1.01 (0.85 to 1.16) | 682 (434 to 887) | 0.56 (0.36 to 0.73) | 272 (151 to 416) | 0.19 (0.11 to 0.3)  | 35 (8 to 78) | 0.03 (0.01 to 0.07) |
|            | Male   | 1120 (933 to 1300)  | 1.98 (1.66 to 2.28) | 625 (405 to 808) | 1.12 (0.73 to 1.44) | 263 (144 to 411) | 0.43 (0.23 to 0.67) | 32 (7 to 72) | 0.06 (0.01 to 0.14) |
|            | Female | 118 (83 to 148)     | 0.18 (0.13 to 0.23) | 56 (30 to 82)    | 0.08 (0.04 to 0.12) | 8 (3 to 15)      | 0.01 (0 to 0.02)    | 3 (1 to 7)   | 0.01 (0 to 0.01)    |
| Gabon      | Both   | 7 (5 to 11)         | 0.68 (0.43 to 0.98) | 5 (3 to 8)       | 0.48 (0.26 to 0.72) | 0 (0 to 1)       | 0.04 (0.01 to 0.14) | 0 (0 to 1)   | 0.03 (0.01 to 0.06) |
|            | Male   | 7 (5 to 10)         | 1.45 (0.95 to 2.09) | 5 (3 to 7)       | 0.98 (0.53 to 1.47) | 0 (0 to 1)       | 0.09 (0.03 to 0.33) | 0 (0 to 1)   | 0.05 (0.02 to 0.1)  |
|            | Female | 0 (0 to 0)          | 0.02 (0.01 to 0.04) | 0 (0 to 1)       | 0.06 (0.03 to 0.1)  | 0 (0 to 0)       | 0.01 (0 to 0.01)    | 0 (0 to 0)   | 0 (0 to 0.01)       |
| The Gambia | Both   | 3 (2 to 4)          | 0.31 (0.22 to 0.41) | 1 (0 to 2)       | 0.09 (0.04 to 0.16) | 0 (0 to 0)       | 0.01 (0 to 0.01)    | 0 (0 to 0)   | 0.01 (0.01 to 0.03) |
|            | Male   | 3 (2 to 4)          | 0.64 (0.45 to 0.85) | 1 (0 to 1)       | 0.18 (0.08 to 0.3)  | 0 (0 to 0)       | 0.01 (0 to 0.03)    | 0 (0 to 0)   | 0.02 (0.01 to 0.05) |
|            | Female | 0 (0 to 0)          | 0.01 (0 to 0.01)    | 0 (0 to 0)       | 0.01 (0 to 0.02)    | 0 (0 to 0)       | 0 (0 to 0)          | 0 (0 to 0)   | 0 (0 to 0.01)       |
| Georgia    | Both   | 159 (126 to 194)    | 2.75 (2.19 to 3.36) | 52 (31 to 74)    | 0.93 (0.55 to 1.32) | 8 (4 to 14)      | 0.13 (0.06 to 0.23) | 7 (3 to 13)  | 0.12 (0.05 to 0.24) |
|            | Male   | 157 (124 to 192)    | 6.41 (5.14 to 7.81) | 52 (31 to 74)    | 2.12 (1.25 to 3.03) | 8 (3 to 14)      | 0.31 (0.14 to 0.54) | 7 (3 to 13)  | 0.27 (0.1 to 0.51)  |
|            | Female | 2 (1 to 3)          | 0.06 (0.04 to 0.1)  | 0 (0 to 1)       | 0.01 (0 to 0.02)    | 0 (0 to 0)       | 0 (0 to 0)          | 0 (0 to 1)   | 0.01 (0 to 0.02)    |
| Germany    | Both   | 1210 (1020 to 1400) | 0.68 (0.58 to 0.77) | 659 (423 to 840) | 0.37 (0.24 to 0.47) | 202 (108 to 308) | 0.09 (0.05 to 0.15) | 40 (9 to 91) | 0.03 (0.01 to 0.06) |
|            | Male   | 1080 (904 to 1250)  | 1.3 (1.1 to 1.5)    | 590 (379 to 754) | 0.72 (0.47 to 0.91) | 194 (103 to 299) | 0.21 (0.11 to 0.33) | 36 (8 to 81) | 0.05 (0.01 to 0.11) |
|            | Female | 132 (95 to 163)     | 0.14 (0.1 to 0.18)  | 69 (39 to 97)    | 0.07 (0.04 to 0.1)  | 7 (3 to 12)      | 0.01 (0 to 0.01)    | 4 (1 to 10)  | 0.01 (0 to 0.01)    |

|           |        |                  |                     |                 |                     |              |                     |             |                     |
|-----------|--------|------------------|---------------------|-----------------|---------------------|--------------|---------------------|-------------|---------------------|
| Ghana     | Both   | 73 (46 to 106)   | 0.49 (0.32 to 0.7)  | 54 (27 to 85)   | 0.34 (0.17 to 0.53) | 2 (1 to 4)   | 0.02 (0.01 to 0.03) | 7 (3 to 13) | 0.04 (0.01 to 0.07) |
|           | Male   | 71 (45 to 104)   | 1.15 (0.74 to 1.62) | 52 (26 to 82)   | 0.77 (0.38 to 1.2)  | 2 (1 to 4)   | 0.04 (0.02 to 0.07) | 6 (2 to 12) | 0.07 (0.03 to 0.15) |
|           | Female | 2 (1 to 3)       | 0.02 (0.01 to 0.04) | 2 (0 to 3)      | 0.02 (0 to 0.03)    | 0 (0 to 0)   | 0 (0 to 0)          | 1 (0 to 1)  | 0.01 (0 to 0.01)    |
| Greece    | Both   | 331 (282 to 372) | 1.42 (1.23 to 1.58) | 128 (76 to 171) | 0.56 (0.34 to 0.75) | 19 (9 to 30) | 0.07 (0.03 to 0.11) | 5 (1 to 11) | 0.03 (0.01 to 0.06) |
|           | Male   | 306 (262 to 345) | 2.87 (2.49 to 3.21) | 125 (75 to 167) | 1.19 (0.73 to 1.59) | 19 (9 to 30) | 0.15 (0.07 to 0.24) | 5 (1 to 10) | 0.05 (0.01 to 0.11) |
|           | Female | 24 (18 to 30)    | 0.18 (0.14 to 0.22) | 3 (1 to 6)      | 0.02 (0.01 to 0.05) | 1 (0 to 1)   | 0 (0 to 0.01)       | 0 (0 to 1)  | 0 (0 to 0.01)       |
| Greenland | Both   | 1 (1 to 1)       | 1.1 (0.85 to 1.38)  | 0 (0 to 0)      | 0.34 (0.16 to 0.55) | 0 (0 to 0)   | 0.16 (0.08 to 0.24) | 0 (0 to 0)  | 0.03 (0.01 to 0.07) |
|           | Male   | 1 (1 to 1)       | 1.96 (1.5 to 2.46)  | 0 (0 to 0)      | 0.61 (0.28 to 0.98) | 0 (0 to 0)   | 0.31 (0.16 to 0.47) | 0 (0 to 0)  | 0.05 (0.01 to 0.12) |
|           | Female | 0 (0 to 0)       | 0.14 (0.1 to 0.18)  | 0 (0 to 0)      | 0.03 (0.01 to 0.05) | 0 (0 to 0)   | 0.01 (0 to 0.01)    | 0 (0 to 0)  | 0 (0 to 0.01)       |
| Grenada   | Both   | 1 (0 to 1)       | 0.57 (0.41 to 0.72) | 0 (0 to 1)      | 0.31 (0.18 to 0.43) | 0 (0 to 0)   | 0.02 (0.01 to 0.03) | 0 (0 to 0)  | 0.04 (0.02 to 0.08) |
|           | Male   | 1 (0 to 1)       | 1.16 (0.85 to 1.46) | 0 (0 to 0)      | 0.63 (0.36 to 0.88) | 0 (0 to 0)   | 0.05 (0.02 to 0.08) | 0 (0 to 0)  | 0.08 (0.03 to 0.15) |
|           | Female | 0 (0 to 0)       | 0.06 (0.03 to 0.08) | 0 (0 to 0)      | 0.03 (0.01 to 0.05) | 0 (0 to 0)   | 0 (0 to 0.01)       | 0 (0 to 0)  | 0.01 (0 to 0.02)    |
| Guam      | Both   | 0 (0 to 0)       | 0.19 (0.14 to 0.26) | 0 (0 to 0)      | 0.03 (0 to 0.08)    | 0 (0 to 0)   | 0.01 (0 to 0.01)    | 0 (0 to 0)  | 0.01 (0 to 0.01)    |
|           | Male   | 0 (0 to 0)       | 0.35 (0.25 to 0.48) | 0 (0 to 0)      | 0.06 (0 to 0.15)    | 0 (0 to 0)   | 0.02 (0.01 to 0.03) | 0 (0 to 0)  | 0.01 (0 to 0.02)    |
|           | Female | 0 (0 to 0)       | 0.05 (0.03 to 0.08) | 0 (0 to 0)      | 0 (0 to 0.01)       | 0 (0 to 0)   | 0 (0 to 0)          | 0 (0 to 0)  | 0 (0 to 0.01)       |
| Guatemala | Both   | 29 (19 to 40)    | 0.27 (0.18 to 0.38) | 6 (3 to 10)     | 0.05 (0.02 to 0.09) | 1 (0 to 1)   | 0.01 (0 to 0.01)    | 3 (1 to 5)  | 0.02 (0.01 to 0.05) |
|           | Male   | 26 (17 to 35)    | 0.55 (0.38 to 0.75) | 5 (2 to 9)      | 0.1 (0.04 to 0.17)  | 0 (0 to 1)   | 0.01 (0.01 to 0.02) | 2 (1 to 4)  | 0.04 (0.02 to 0.08) |
|           | Female | 3 (2 to 5)       | 0.05 (0.03 to 0.09) | 1 (0 to 1)      | 0.01 (0 to 0.02)    | 0 (0 to 0)   | 0 (0 to 0)          | 1 (0 to 1)  | 0.01 (0 to 0.02)    |
| Guinea    | Both   | 36 (24 to 50)    | 0.67 (0.44 to 0.94) | 5 (2 to 10)     | 0.1 (0.03 to 0.18)  | 1 (0 to 1)   | 0.01 (0 to 0.03)    | 2 (1 to 3)  | 0.03 (0.01 to 0.06) |
|           | Male   | 35 (23 to 49)    | 1.29 (0.86 to 1.81) | 5 (2 to 10)     | 0.18 (0.06 to 0.34) | 1 (0 to 1)   | 0.02 (0.01 to 0.05) | 2 (1 to 3)  | 0.05 (0.02 to 0.1)  |
|           | Female | 1 (0 to 1)       | 0.03 (0.01 to 0.04) | 0 (0 to 0)      | 0.01 (0 to 0.01)    | 0 (0 to 0)   | 0 (0 to 0)          | 0 (0 to 0)  | 0.01 (0 to 0.01)    |

|               |        |                        |                     |                     |                     |                  |                     |                    |                     |
|---------------|--------|------------------------|---------------------|---------------------|---------------------|------------------|---------------------|--------------------|---------------------|
| Guinea-Bissau | Both   | 4 (2 to 6)             | 0.54 (0.33 to 0.78) | 2 (1 to 4)          | 0.28 (0.12 to 0.49) | 0 (0 to 0)       | 0.02 (0.01 to 0.05) | 0 (0 to 1)         | 0.04 (0.02 to 0.09) |
|               | Male   | 4 (2 to 6)             | 1.17 (0.72 to 1.7)  | 2 (1 to 4)          | 0.59 (0.25 to 1.03) | 0 (0 to 0)       | 0.05 (0.02 to 0.1)  | 0 (0 to 1)         | 0.09 (0.03 to 0.17) |
|               | Female | 0 (0 to 0)             | 0.01 (0.01 to 0.02) | 0 (0 to 0)          | 0.02 (0.01 to 0.04) | 0 (0 to 0)       | 0 (0 to 0)          | 0 (0 to 0)         | 0.01 (0 to 0.01)    |
| Guyana        | Both   | 4 (3 to 5)             | 0.57 (0.39 to 0.8)  | 2 (1 to 3)          | 0.31 (0.16 to 0.47) | 0 (0 to 0)       | 0.02 (0.01 to 0.04) | 0 (0 to 1)         | 0.05 (0.02 to 0.09) |
|               | Male   | 4 (2 to 5)             | 1.17 (0.8 to 1.63)  | 2 (1 to 3)          | 0.66 (0.35 to 0.98) | 0 (0 to 0)       | 0.05 (0.02 to 0.09) | 0 (0 to 1)         | 0.09 (0.03 to 0.17) |
|               | Female | 0 (0 to 0)             | 0.05 (0.03 to 0.07) | 0 (0 to 0)          | 0.01 (0 to 0.02)    | 0 (0 to 0)       | 0 (0 to 0.01)       | 0 (0 to 0)         | 0.01 (0 to 0.01)    |
| Haiti         | Both   | 47 (25 to 74)          | 0.67 (0.36 to 1.05) | 38 (18 to 61)       | 0.53 (0.24 to 0.86) | 5 (1 to 10)      | 0.08 (0.03 to 0.17) | 6 (2 to 11)        | 0.07 (0.03 to 0.14) |
|               | Male   | 44 (24 to 70)          | 1.35 (0.73 to 2.13) | 36 (17 to 59)       | 1.08 (0.5 to 1.75)  | 4 (1 to 9)       | 0.17 (0.05 to 0.35) | 5 (2 to 10)        | 0.14 (0.05 to 0.28) |
|               | Female | 2 (1 to 4)             | 0.06 (0.03 to 0.11) | 2 (1 to 3)          | 0.04 (0.01 to 0.07) | 0 (0 to 1)       | 0.01 (0 to 0.02)    | 1 (0 to 1)         | 0.02 (0.01 to 0.03) |
| Honduras      | Both   | 38 (28 to 51)          | 0.67 (0.48 to 0.88) | 9 (4 to 14)         | 0.14 (0.07 to 0.23) | 2 (1 to 4)       | 0.04 (0.02 to 0.07) | 3 (1 to 6)         | 0.05 (0.02 to 0.09) |
|               | Male   | 35 (25 to 45)          | 1.27 (0.92 to 1.64) | 8 (4 to 13)         | 0.29 (0.15 to 0.46) | 2 (1 to 3)       | 0.07 (0.03 to 0.12) | 2 (1 to 5)         | 0.08 (0.03 to 0.15) |
|               | Female | 4 (2 to 6)             | 0.13 (0.08 to 0.2)  | 0 (0 to 1)          | 0.02 (0.01 to 0.03) | 0 (0 to 1)       | 0.02 (0 to 0.04)    | 1 (0 to 1)         | 0.02 (0.01 to 0.04) |
| Hungary       | Both   | 367 (290 to 458)       | 2.13 (1.67 to 2.66) | 175 (106 to 239)    | 1.02 (0.62 to 1.4)  | 9 (4 to 16)      | 0.05 (0.02 to 0.08) | 13 (3 to 28)       | 0.08 (0.02 to 0.17) |
|               | Male   | 331 (260 to 414)       | 4.33 (3.4 to 5.43)  | 168 (102 to 230)    | 2.21 (1.34 to 3.01) | 8 (4 to 15)      | 0.11 (0.05 to 0.19) | 11 (3 to 25)       | 0.15 (0.03 to 0.33) |
|               | Female | 37 (25 to 48)          | 0.39 (0.26 to 0.51) | 7 (3 to 13)         | 0.08 (0.03 to 0.14) | 1 (0 to 1)       | 0.01 (0 to 0.01)    | 2 (0 to 3)         | 0.02 (0 to 0.04)    |
| Iceland       | Both   | 2 (1 to 2)             | 0.32 (0.26 to 0.39) | 1 (0 to 1)          | 0.13 (0.08 to 0.18) | 0 (0 to 0)       | 0.05 (0.03 to 0.07) | 0 (0 to 0)         | 0.01 (0 to 0.03)    |
|               | Male   | 1 (1 to 2)             | 0.57 (0.45 to 0.69) | 1 (0 to 1)          | 0.24 (0.14 to 0.34) | 0 (0 to 0)       | 0.1 (0.05 to 0.15)  | 0 (0 to 0)         | 0.02 (0 to 0.05)    |
|               | Female | 0 (0 to 0)             | 0.09 (0.07 to 0.12) | 0 (0 to 0)          | 0.03 (0.01 to 0.04) | 0 (0 to 0)       | 0 (0 to 0.01)       | 0 (0 to 0)         | 0 (0 to 0.01)       |
| India         | Both   | 15700 (12200 to 19800) | 1.38 (1.08 to 1.73) | 4120 (2150 to 6280) | 0.34 (0.18 to 0.53) | 534 (276 to 887) | 0.05 (0.03 to 0.09) | 1120 (465 to 2110) | 0.09 (0.04 to 0.17) |
|               | Male   | 14900 (11500 to 19000) | 2.71 (2.1 to 3.42)  | 4050 (2130 to 6180) | 0.69 (0.36 to 1.07) | 497 (240 to 840) | 0.11 (0.05 to 0.18) | 1040 (423 to 1970) | 0.17 (0.07 to 0.32) |
|               | Female | 795 (523 to 1130)      | 0.14 (0.09 to 0.2)  | 73 (26 to 136)      | 0.01 (0 to 0.02)    | 37 (14 to 73)    | 0.01 (0 to 0.01)    | 86 (34 to 168)     | 0.01 (0.01 to 0.03) |

|           |        |                    |                     |                   |                      |                  |                     |                |                     |
|-----------|--------|--------------------|---------------------|-------------------|----------------------|------------------|---------------------|----------------|---------------------|
| Indonesia | Both   | 1380 (986 to 1960) | 0.68 (0.5 to 0.96)  | 33 (FALSE to 104) | 0.01 (-0.01 to 0.05) | 22 (11 to 40)    | 0.01 (0.01 to 0.03) | 74 (28 to 151) | 0.03 (0.01 to 0.06) |
|           | Male   | 1310 (933 to 1880) | 1.41 (1.02 to 2)    | 32 (FALSE to 103) | 0.03 (-0.01 to 0.09) | 21 (9 to 38)     | 0.03 (0.01 to 0.06) | 62 (23 to 128) | 0.05 (0.02 to 0.11) |
|           | Female | 61 (37 to 91)      | 0.06 (0.04 to 0.09) | 0 (0 to 1)        | 0 (0 to 0)           | 2 (1 to 3)       | 0 (0 to 0)          | 13 (5 to 26)   | 0.01 (0 to 0.02)    |
| Iran      | Both   | 849 (691 to 988)   | 1.21 (0.97 to 1.41) | 39 (20 to 58)     | 0.05 (0.03 to 0.08)  | 5 (3 to 10)      | 0.01 (0 to 0.02)    | 33 (13 to 62)  | 0.04 (0.02 to 0.08) |
|           | Male   | 800 (658 to 930)   | 2.28 (1.85 to 2.66) | 36 (19 to 55)     | 0.09 (0.05 to 0.14)  | 5 (2 to 9)       | 0.02 (0.01 to 0.03) | 30 (12 to 57)  | 0.08 (0.03 to 0.14) |
|           | Female | 49 (32 to 67)      | 0.13 (0.09 to 0.19) | 2 (1 to 3)        | 0.01 (0 to 0.01)     | 0 (0 to 1)       | 0 (0 to 0)          | 2 (1 to 5)     | 0.01 (0 to 0.01)    |
| Iraq      | Both   | 369 (279 to 459)   | 1.71 (1.31 to 2.1)  | 13 (4 to 27)      | 0.05 (0.01 to 0.1)   | 10 (5 to 19)     | 0.06 (0.03 to 0.11) | 13 (5 to 25)   | 0.05 (0.02 to 0.1)  |
|           | Male   | 339 (255 to 422)   | 3.3 (2.53 to 4.06)  | 12 (4 to 25)      | 0.1 (0.03 to 0.2)    | 10 (4 to 18)     | 0.13 (0.05 to 0.22) | 12 (5 to 24)   | 0.1 (0.04 to 0.19)  |
|           | Female | 30 (18 to 44)      | 0.25 (0.15 to 0.36) | 1 (0 to 2)        | 0 (0 to 0.01)        | 1 (0 to 1)       | 0.01 (0 to 0.01)    | 1 (0 to 1)     | 0 (0 to 0.01)       |
| Ireland   | Both   | 43 (36 to 51)      | 0.58 (0.48 to 0.67) | 19 (11 to 26)     | 0.26 (0.15 to 0.35)  | 5 (3 to 9)       | 0.07 (0.04 to 0.11) | 1 (0 to 3)     | 0.02 (0 to 0.04)    |
|           | Male   | 37 (30 to 44)      | 1.06 (0.87 to 1.25) | 17 (10 to 23)     | 0.49 (0.3 to 0.66)   | 5 (3 to 9)       | 0.15 (0.08 to 0.24) | 1 (0 to 2)     | 0.03 (0.01 to 0.06) |
|           | Female | 6 (5 to 8)         | 0.15 (0.11 to 0.19) | 2 (1 to 3)        | 0.05 (0.02 to 0.07)  | 0 (0 to 0)       | 0 (0 to 0.01)       | 0 (0 to 0)     | 0 (0 to 0.01)       |
| Israel    | Both   | 66 (55 to 77)      | 0.57 (0.48 to 0.66) | 11 (4 to 18)      | 0.1 (0.04 to 0.16)   | 5 (2 to 8)       | 0.04 (0.02 to 0.07) | 2 (0 to 4)     | 0.02 (0 to 0.04)    |
|           | Male   | 60 (49 to 70)      | 1.13 (0.94 to 1.32) | 10 (4 to 17)      | 0.2 (0.08 to 0.33)   | 5 (2 to 8)       | 0.09 (0.04 to 0.15) | 2 (0 to 4)     | 0.03 (0.01 to 0.07) |
|           | Female | 6 (5 to 8)         | 0.1 (0.07 to 0.13)  | 1 (0 to 1)        | 0.01 (0 to 0.02)     | 0 (0 to 0)       | 0 (0 to 0.01)       | 0 (0 to 0)     | 0 (0 to 0.01)       |
| Italy     | Both   | 1190 (990 to 1360) | 0.86 (0.73 to 0.96) | 532 (327 to 713)  | 0.39 (0.24 to 0.51)  | 267 (149 to 396) | 0.16 (0.09 to 0.25) | 27 (6 to 58)   | 0.02 (0.01 to 0.05) |
|           | Male   | 1100 (921 to 1260) | 1.77 (1.5 to 1.99)  | 504 (312 to 671)  | 0.81 (0.51 to 1.08)  | 256 (141 to 383) | 0.37 (0.2 to 0.56)  | 25 (6 to 54)   | 0.04 (0.01 to 0.1)  |
|           | Female | 85 (62 to 109)     | 0.11 (0.09 to 0.14) | 28 (14 to 43)     | 0.04 (0.02 to 0.06)  | 11 (4 to 19)     | 0.01 (0 to 0.02)    | 2 (0 to 4)     | 0 (0 to 0.01)       |
| Jamaica   | Both   | 23 (16 to 30)      | 0.78 (0.56 to 1.03) | 6 (3 to 10)       | 0.22 (0.1 to 0.35)   | 1 (0 to 1)       | 0.03 (0.01 to 0.05) | 1 (0 to 2)     | 0.04 (0.02 to 0.08) |
|           | Male   | 22 (16 to 29)      | 1.57 (1.12 to 2.07) | 6 (3 to 10)       | 0.44 (0.21 to 0.69)  | 1 (0 to 1)       | 0.06 (0.02 to 0.1)  | 1 (0 to 2)     | 0.08 (0.03 to 0.16) |
|           | Female | 1 (0 to 1)         | 0.05 (0.03 to 0.07) | 0 (0 to 0)        | 0.01 (0 to 0.02)     | 0 (0 to 0)       | 0 (0 to 0)          | 0 (0 to 0)     | 0 (0 to 0.01)       |

|            |        |                  |                     |                  |                     |                 |                     |              |                     |
|------------|--------|------------------|---------------------|------------------|---------------------|-----------------|---------------------|--------------|---------------------|
| Japan      | Both   | 849 (696 to 971) | 0.22 (0.19 to 0.25) | 255 (131 to 390) | 0.07 (0.04 to 0.11) | 122 (62 to 186) | 0.03 (0.01 to 0.04) | 19 (5 to 43) | 0.01 (0 to 0.01)    |
|            | Male   | 800 (658 to 909) | 0.47 (0.4 to 0.53)  | 237 (121 to 362) | 0.15 (0.08 to 0.22) | 118 (59 to 183) | 0.06 (0.03 to 0.1)  | 17 (4 to 39) | 0.01 (0 to 0.03)    |
|            | Female | 49 (31 to 69)    | 0.02 (0.02 to 0.03) | 17 (8 to 30)     | 0.01 (0 to 0.02)    | 3 (1 to 6)      | 0 (0 to 0)          | 2 (0 to 4)   | 0 (0 to 0)          |
| Jordan     | Both   | 36 (27 to 48)    | 0.59 (0.45 to 0.8)  | 1 (0 to 3)       | 0.02 (0.01 to 0.04) | 1 (0 to 2)      | 0.03 (0.01 to 0.05) | 1 (0 to 2)   | 0.01 (0 to 0.02)    |
|            | Male   | 34 (25 to 46)    | 1.07 (0.79 to 1.46) | 1 (0 to 3)       | 0.03 (0.01 to 0.07) | 1 (0 to 2)      | 0.05 (0.02 to 0.09) | 1 (0 to 2)   | 0.02 (0.01 to 0.04) |
|            | Female | 2 (1 to 3)       | 0.08 (0.05 to 0.11) | 0 (0 to 0)       | 0 (0 to 0)          | 0 (0 to 0)      | 0 (0 to 0)          | 0 (0 to 0)   | 0 (0 to 0)          |
| Kazakhstan | Both   | 192 (155 to 228) | 1.05 (0.85 to 1.24) | 61 (33 to 91)    | 0.32 (0.17 to 0.48) | 5 (3 to 9)      | 0.03 (0.02 to 0.05) | 10 (4 to 19) | 0.05 (0.02 to 0.1)  |
|            | Male   | 188 (152 to 224) | 2.55 (2.08 to 3.04) | 59 (32 to 86)    | 0.74 (0.39 to 1.1)  | 5 (2 to 8)      | 0.08 (0.04 to 0.13) | 9 (4 to 18)  | 0.11 (0.04 to 0.2)  |
|            | Female | 3 (2 to 5)       | 0.03 (0.02 to 0.05) | 2 (1 to 4)       | 0.02 (0.01 to 0.04) | 0 (0 to 1)      | 0 (0 to 0.01)       | 1 (0 to 2)   | 0.01 (0 to 0.02)    |
| Kenya      | Both   | 131 (86 to 190)  | 0.57 (0.39 to 0.83) | 66 (33 to 103)   | 0.27 (0.14 to 0.43) | 5 (2 to 17)     | 0.03 (0.01 to 0.09) | 15 (5 to 29) | 0.05 (0.02 to 0.11) |
|            | Male   | 127 (84 to 185)  | 1.19 (0.81 to 1.74) | 63 (32 to 99)    | 0.55 (0.27 to 0.87) | 4 (1 to 16)     | 0.05 (0.01 to 0.2)  | 13 (5 to 26) | 0.1 (0.03 to 0.19)  |
|            | Female | 4 (2 to 6)       | 0.04 (0.02 to 0.06) | 3 (1 to 5)       | 0.02 (0.01 to 0.04) | 1 (0 to 1)      | 0.01 (0 to 0.01)    | 2 (1 to 4)   | 0.01 (0.01 to 0.03) |
| Kiribati   | Both   | 0 (0 to 0)       | 0.55 (0.43 to 0.7)  | 0 (0 to 0)       | 0.03 (0 to 0.07)    | 0 (0 to 0)      | 0.01 (0 to 0.01)    | 0 (0 to 0)   | 0.01 (0 to 0.02)    |
|            | Male   | 0 (0 to 0)       | 1.1 (0.83 to 1.41)  | 0 (0 to 0)       | 0.07 (0 to 0.17)    | 0 (0 to 0)      | 0.01 (0.01 to 0.02) | 0 (0 to 0)   | 0.02 (0.01 to 0.03) |
|            | Female | 0 (0 to 0)       | 0.22 (0.15 to 0.29) | 0 (0 to 0)       | 0 (0 to 0)          | 0 (0 to 0)      | 0 (0 to 0.01)       | 0 (0 to 0)   | 0.01 (0 to 0.01)    |
| Kuwait     | Both   | 11 (8 to 14)     | 0.52 (0.39 to 0.67) | 0 (0 to 0)       | 0 (0 to 0.01)       | 1 (0 to 1)      | 0.04 (0.02 to 0.07) | 0 (0 to 1)   | 0.01 (0 to 0.02)    |
|            | Male   | 10 (8 to 13)     | 0.84 (0.63 to 1.09) | 0 (0 to 0)       | 0 (0 to 0.01)       | 1 (0 to 1)      | 0.07 (0.03 to 0.11) | 0 (0 to 1)   | 0.02 (0.01 to 0.03) |
|            | Female | 0 (0 to 1)       | 0.04 (0.02 to 0.06) | 0 (0 to 0)       | 0 (0 to 0)          | 0 (0 to 0)      | 0 (0 to 0)          | 0 (0 to 0)   | 0 (0 to 0)          |
| Kyrgyzstan | Both   | 30 (24 to 36)    | 0.63 (0.51 to 0.75) | 8 (5 to 12)      | 0.16 (0.09 to 0.25) | 0 (0 to 1)      | 0.01 (0 to 0.01)    | 1 (1 to 3)   | 0.03 (0.01 to 0.05) |
|            | Male   | 29 (23 to 35)    | 1.43 (1.17 to 1.72) | 8 (5 to 12)      | 0.36 (0.2 to 0.54)  | 0 (0 to 1)      | 0.02 (0.01 to 0.03) | 1 (1 to 3)   | 0.05 (0.02 to 0.1)  |
|            | Female | 1 (1 to 1)       | 0.03 (0.02 to 0.05) | 0 (0 to 0)       | 0.01 (0 to 0.02)    | 0 (0 to 0)      | 0 (0 to 0)          | 0 (0 to 0)   | 0 (0 to 0.01)       |

|           |        |                 |                     |               |                     |            |                     |            |                     |
|-----------|--------|-----------------|---------------------|---------------|---------------------|------------|---------------------|------------|---------------------|
| Laos      | Both   | 35 (25 to 49)   | 0.87 (0.62 to 1.19) | 10 (4 to 17)  | 0.22 (0.09 to 0.38) | 0 (0 to 1) | 0.01 (0 to 0.02)    | 2 (1 to 4) | 0.04 (0.02 to 0.09) |
|           | Male   | 33 (23 to 46)   | 1.71 (1.23 to 2.35) | 9 (4 to 16)   | 0.42 (0.18 to 0.73) | 0 (0 to 1) | 0.02 (0.01 to 0.05) | 2 (1 to 3) | 0.06 (0.02 to 0.13) |
|           | Female | 2 (1 to 4)      | 0.12 (0.07 to 0.18) | 1 (0 to 2)    | 0.03 (0.01 to 0.07) | 0 (0 to 0) | 0 (0 to 0)          | 1 (0 to 1) | 0.02 (0.01 to 0.04) |
| Latvia    | Both   | 52 (39 to 67)   | 1.46 (1.1 to 1.92)  | 25 (15 to 37) | 0.73 (0.43 to 1.05) | 2 (1 to 3) | 0.04 (0.02 to 0.07) | 1 (0 to 2) | 0.03 (0.01 to 0.07) |
|           | Male   | 51 (38 to 66)   | 3.55 (2.67 to 4.64) | 25 (15 to 36) | 1.75 (1.04 to 2.51) | 1 (1 to 3) | 0.1 (0.04 to 0.18)  | 1 (0 to 2) | 0.06 (0.01 to 0.14) |
|           | Female | 1 (1 to 2)      | 0.05 (0.03 to 0.08) | 0 (0 to 1)    | 0.02 (0.01 to 0.04) | 0 (0 to 0) | 0 (0 to 0)          | 0 (0 to 0) | 0 (0 to 0.01)       |
| Lebanon   | Both   | 124 (98 to 160) | 2.38 (1.9 to 3.09)  | 9 (4 to 14)   | 0.17 (0.09 to 0.28) | 0 (0 to 2) | 0.01 (0 to 0.03)    | 3 (1 to 7) | 0.07 (0.03 to 0.13) |
|           | Male   | 111 (87 to 144) | 4.74 (3.72 to 6.13) | 9 (4 to 14)   | 0.38 (0.19 to 0.6)  | 0 (0 to 2) | 0.01 (0 to 0.07)    | 3 (1 to 6) | 0.14 (0.06 to 0.27) |
|           | Female | 13 (9 to 18)    | 0.46 (0.32 to 0.65) | 0 (0 to 0)    | 0.01 (0 to 0.01)    | 0 (0 to 0) | 0 (0 to 0.01)       | 0 (0 to 0) | 0.01 (0 to 0.01)    |
| Lesotho   | Both   | 24 (18 to 32)   | 1.83 (1.35 to 2.43) | 7 (3 to 12)   | 0.53 (0.24 to 0.87) | 5 (2 to 8) | 0.37 (0.14 to 0.66) | 1 (0 to 1) | 0.04 (0.02 to 0.09) |
|           | Male   | 22 (16 to 29)   | 4.18 (3.17 to 5.46) | 7 (3 to 11)   | 1.2 (0.55 to 1.95)  | 5 (2 to 8) | 0.95 (0.35 to 1.67) | 1 (0 to 1) | 0.09 (0.03 to 0.17) |
|           | Female | 2 (1 to 3)      | 0.25 (0.15 to 0.38) | 0 (0 to 1)    | 0.05 (0.02 to 0.1)  | 0 (0 to 0) | 0.02 (0.01 to 0.04) | 0 (0 to 0) | 0.01 (0 to 0.03)    |
| Liberia   | Both   | 8 (5 to 11)     | 0.38 (0.23 to 0.57) | 4 (2 to 7)    | 0.2 (0.09 to 0.34)  | 0 (0 to 0) | 0.01 (0 to 0.02)    | 1 (0 to 1) | 0.03 (0.01 to 0.06) |
|           | Male   | 7 (5 to 11)     | 0.73 (0.44 to 1.08) | 4 (2 to 7)    | 0.38 (0.17 to 0.63) | 0 (0 to 0) | 0.01 (0 to 0.04)    | 1 (0 to 1) | 0.05 (0.02 to 0.09) |
|           | Female | 0 (0 to 0)      | 0.02 (0.01 to 0.03) | 0 (0 to 0)    | 0.02 (0.01 to 0.04) | 0 (0 to 0) | 0 (0 to 0)          | 0 (0 to 0) | 0.01 (0 to 0.01)    |
| Libya     | Both   | 102 (76 to 136) | 2.01 (1.51 to 2.65) | 3 (1 to 5)    | 0.05 (0.01 to 0.08) | 1 (0 to 3) | 0.02 (0 to 0.08)    | 3 (1 to 6) | 0.05 (0.02 to 0.11) |
|           | Male   | 101 (75 to 134) | 3.92 (2.93 to 5.16) | 3 (1 to 5)    | 0.09 (0.02 to 0.15) | 1 (0 to 3) | 0.03 (0.01 to 0.15) | 3 (1 to 6) | 0.1 (0.04 to 0.2)   |
|           | Female | 1 (0 to 1)      | 0.04 (0.02 to 0.06) | 0 (0 to 0)    | 0 (0 to 0)          | 0 (0 to 0) | 0 (0 to 0)          | 0 (0 to 0) | 0.01 (0 to 0.01)    |
| Lithuania | Both   | 85 (65 to 106)  | 1.64 (1.25 to 2.05) | 44 (26 to 60) | 0.86 (0.51 to 1.18) | 2 (1 to 3) | 0.03 (0.01 to 0.05) | 2 (0 to 4) | 0.04 (0.01 to 0.08) |
|           | Male   | 83 (64 to 104)  | 3.97 (3.03 to 4.96) | 43 (25 to 58) | 2.05 (1.22 to 2.79) | 2 (1 to 3) | 0.08 (0.03 to 0.14) | 2 (0 to 4) | 0.08 (0.02 to 0.17) |
|           | Female | 2 (1 to 3)      | 0.07 (0.04 to 0.09) | 1 (1 to 2)    | 0.04 (0.02 to 0.07) | 0 (0 to 0) | 0 (0 to 0)          | 0 (0 to 0) | 0 (0 to 0.01)       |

|            |        |                  |                     |              |                      |            |                     |              |                     |
|------------|--------|------------------|---------------------|--------------|----------------------|------------|---------------------|--------------|---------------------|
| Luxembourg | Both   | 6 (5 to 8)       | 0.67 (0.54 to 0.8)  | 3 (2 to 5)   | 0.35 (0.22 to 0.46)  | 1 (1 to 2) | 0.1 (0.05 to 0.15)  | 0 (0 to 0)   | 0.01 (0 to 0.03)    |
|            | Male   | 6 (5 to 7)       | 1.22 (0.99 to 1.47) | 3 (2 to 4)   | 0.67 (0.42 to 0.89)  | 1 (1 to 2) | 0.22 (0.11 to 0.34) | 0 (0 to 0)   | 0.03 (0.01 to 0.06) |
|            | Female | 1 (1 to 1)       | 0.16 (0.12 to 0.21) | 0 (0 to 1)   | 0.06 (0.03 to 0.1)   | 0 (0 to 0) | 0 (0 to 0.01)       | 0 (0 to 0)   | 0 (0 to 0.01)       |
| Madagascar | Both   | 33 (19 to 50)    | 0.29 (0.17 to 0.44) | 11 (3 to 22) | 0.09 (0.02 to 0.18)  | 1 (0 to 4) | 0.01 (0 to 0.05)    | 5 (2 to 10)  | 0.04 (0.01 to 0.07) |
|            | Male   | 31 (18 to 48)    | 0.57 (0.34 to 0.86) | 10 (3 to 20) | 0.16 (0.04 to 0.33)  | 0 (0 to 4) | 0.01 (0 to 0.1)     | 4 (1 to 7)   | 0.05 (0.02 to 0.1)  |
|            | Female | 2 (1 to 3)       | 0.03 (0.02 to 0.06) | 1 (0 to 2)   | 0.02 (0 to 0.04)     | 0 (0 to 1) | 0.01 (0 to 0.01)    | 2 (1 to 3)   | 0.02 (0.01 to 0.04) |
| Malawi     | Both   | 17 (12 to 23)    | 0.24 (0.17 to 0.32) | 5 (2 to 8)   | 0.06 (0.03 to 0.11)  | 0 (0 to 2) | 0.01 (0 to 0.03)    | 2 (1 to 3)   | 0.02 (0.01 to 0.04) |
|            | Male   | 16 (11 to 22)    | 0.54 (0.39 to 0.72) | 4 (2 to 7)   | 0.13 (0.06 to 0.21)  | 0 (0 to 2) | 0.01 (0 to 0.08)    | 1 (0 to 2)   | 0.03 (0.01 to 0.06) |
|            | Female | 1 (0 to 2)       | 0.02 (0.01 to 0.04) | 1 (0 to 1)   | 0.01 (0 to 0.03)     | 0 (0 to 0) | 0 (0 to 0.01)       | 0 (0 to 1)   | 0.01 (0 to 0.02)    |
| Malaysia   | Both   | 214 (157 to 279) | 0.85 (0.63 to 1.1)  | 24 (9 to 41) | 0.08 (0.03 to 0.15)  | 3 (1 to 6) | 0.02 (0.01 to 0.03) | 11 (4 to 21) | 0.04 (0.01 to 0.07) |
|            | Male   | 208 (151 to 272) | 1.66 (1.23 to 2.14) | 23 (8 to 40) | 0.16 (0.06 to 0.29)  | 3 (1 to 6) | 0.03 (0.01 to 0.06) | 10 (4 to 19) | 0.07 (0.03 to 0.13) |
|            | Female | 6 (4 to 10)      | 0.05 (0.03 to 0.09) | 1 (0 to 1)   | 0 (0 to 0.01)        | 0 (0 to 0) | 0 (0 to 0)          | 1 (1 to 3)   | 0.01 (0 to 0.02)    |
| Maldives   | Both   | 2 (1 to 2)       | 0.67 (0.54 to 0.83) | 0 (0 to 0)   | 0.04 (-0.01 to 0.1)  | 0 (0 to 0) | 0.04 (0.02 to 0.07) | 0 (0 to 0)   | 0.02 (0.01 to 0.03) |
|            | Male   | 2 (1 to 2)       | 1.24 (0.99 to 1.53) | 0 (0 to 0)   | 0.07 (-0.01 to 0.18) | 0 (0 to 0) | 0.08 (0.04 to 0.14) | 0 (0 to 0)   | 0.03 (0.01 to 0.06) |
|            | Female | 0 (0 to 0)       | 0.02 (0.01 to 0.04) | 0 (0 to 0)   | 0 (0 to 0)           | 0 (0 to 0) | 0 (0 to 0)          | 0 (0 to 0)   | 0 (0 to 0)          |
| Mali       | Both   | 31 (21 to 46)    | 0.37 (0.25 to 0.53) | 5 (2 to 8)   | 0.05 (0.02 to 0.09)  | 0 (0 to 1) | 0 (0 to 0.01)       | 3 (1 to 5)   | 0.03 (0.01 to 0.05) |
|            | Male   | 30 (20 to 44)    | 0.69 (0.46 to 0.98) | 4 (2 to 6)   | 0.08 (0.04 to 0.14)  | 0 (0 to 1) | 0.01 (0 to 0.02)    | 2 (1 to 4)   | 0.04 (0.01 to 0.08) |
|            | Female | 1 (1 to 2)       | 0.03 (0.01 to 0.05) | 1 (0 to 2)   | 0.02 (0.01 to 0.04)  | 0 (0 to 0) | 0 (0 to 0.01)       | 1 (0 to 1)   | 0.01 (0 to 0.02)    |
| Malta      | Both   | 6 (5 to 7)       | 0.7 (0.57 to 0.84)  | 2 (1 to 3)   | 0.29 (0.17 to 0.4)   | 1 (1 to 2) | 0.11 (0.06 to 0.17) | 0 (0 to 0)   | 0.02 (0.01 to 0.05) |
|            | Male   | 6 (4 to 7)       | 1.35 (1.09 to 1.63) | 2 (1 to 3)   | 0.58 (0.34 to 0.8)   | 1 (1 to 2) | 0.25 (0.13 to 0.38) | 0 (0 to 0)   | 0.04 (0.01 to 0.1)  |
|            | Female | 1 (0 to 1)       | 0.12 (0.09 to 0.16) | 0 (0 to 0)   | 0.03 (0.01 to 0.05)  | 0 (0 to 0) | 0 (0 to 0.01)       | 0 (0 to 0)   | 0 (0 to 0.01)       |



|                                 |        |                  |                     |                  |                     |               |                     |               |                     |
|---------------------------------|--------|------------------|---------------------|------------------|---------------------|---------------|---------------------|---------------|---------------------|
| Marshall Islands                | Both   | 0 (0 to 0)       | 0.64 (0.43 to 0.91) | 0 (0 to 0)       | 0.1 (0.01 to 0.21)  | 0 (0 to 0)    | 0.04 (0.02 to 0.08) | 0 (0 to 0)    | 0.02 (0.01 to 0.04) |
|                                 | Male   | 0 (0 to 0)       | 1.11 (0.73 to 1.57) | 0 (0 to 0)       | 0.18 (0.03 to 0.38) | 0 (0 to 0)    | 0.07 (0.03 to 0.14) | 0 (0 to 0)    | 0.03 (0.01 to 0.06) |
|                                 | Female | 0 (0 to 0)       | 0.12 (0.07 to 0.2)  | 0 (0 to 0)       | 0 (0 to 0.01)       | 0 (0 to 0)    | 0 (0 to 0.01)       | 0 (0 to 0)    | 0.01 (0 to 0.02)    |
| Mauritania                      | Both   | 7 (5 to 10)      | 0.36 (0.23 to 0.51) | 0 (0 to 0)       | 0 (0 to 0)          | 0 (0 to 0)    | 0.01 (0 to 0.01)    | 0 (0 to 1)    | 0.01 (0 to 0.03)    |
|                                 | Male   | 7 (4 to 10)      | 0.69 (0.44 to 0.98) | 0 (0 to 0)       | 0 (0 to 0)          | 0 (0 to 0)    | 0.01 (0 to 0.03)    | 0 (0 to 1)    | 0.03 (0.01 to 0.05) |
|                                 | Female | 0 (0 to 0)       | 0.01 (0.01 to 0.03) | 0 (0 to 0)       | 0 (0 to 0)          | 0 (0 to 0)    | 0 (0 to 0)          | 0 (0 to 0)    | 0 (0 to 0)          |
| Mauritius                       | Both   | 13 (10 to 16)    | 0.73 (0.56 to 0.92) | 4 (2 to 6)       | 0.21 (0.1 to 0.34)  | 0 (0 to 0)    | 0.01 (0 to 0.01)    | 1 (0 to 1)    | 0.03 (0.01 to 0.06) |
|                                 | Male   | 13 (10 to 16)    | 1.62 (1.24 to 2.03) | 4 (2 to 6)       | 0.47 (0.21 to 0.73) | 0 (0 to 0)    | 0.02 (0.01 to 0.03) | 1 (0 to 1)    | 0.06 (0.02 to 0.11) |
|                                 | Female | 0 (0 to 0)       | 0.03 (0.01 to 0.05) | 0 (0 to 0)       | 0.01 (0 to 0.01)    | 0 (0 to 0)    | 0 (0 to 0)          | 0 (0 to 0)    | 0 (0 to 0.01)       |
| Mexico                          | Both   | 517 (381 to 680) | 0.46 (0.34 to 0.6)  | 220 (122 to 321) | 0.19 (0.1 to 0.28)  | 34 (18 to 56) | 0.03 (0.02 to 0.05) | 42 (17 to 78) | 0.04 (0.01 to 0.07) |
|                                 | Male   | 490 (362 to 647) | 0.95 (0.71 to 1.24) | 210 (118 to 307) | 0.39 (0.22 to 0.57) | 32 (16 to 54) | 0.06 (0.03 to 0.11) | 38 (15 to 71) | 0.07 (0.03 to 0.13) |
|                                 | Female | 27 (16 to 42)    | 0.05 (0.03 to 0.07) | 10 (4 to 19)     | 0.02 (0.01 to 0.03) | 2 (1 to 4)    | 0 (0 to 0.01)       | 4 (2 to 8)    | 0.01 (0 to 0.01)    |
| Federatead States of Micronesia | Both   | 0 (0 to 1)       | 0.66 (0.46 to 0.9)  | 0 (0 to 0)       | 0.08 (0.03 to 0.14) | 0 (0 to 0)    | 0.04 (0.02 to 0.08) | 0 (0 to 0)    | 0.02 (0.01 to 0.05) |
|                                 | Male   | 0 (0 to 1)       | 1.26 (0.87 to 1.71) | 0 (0 to 0)       | 0.17 (0.06 to 0.3)  | 0 (0 to 0)    | 0.09 (0.03 to 0.18) | 0 (0 to 0)    | 0.04 (0.01 to 0.07) |
|                                 | Female | 0 (0 to 0)       | 0.2 (0.12 to 0.3)   | 0 (0 to 0)       | 0 (0 to 0)          | 0 (0 to 0)    | 0 (0 to 0.01)       | 0 (0 to 0)    | 0.01 (0 to 0.03)    |
| Monaco                          | Both   | 2 (2 to 3)       | 2.36 (1.79 to 2.97) | 1 (0 to 1)       | 0.73 (0 to 1.44)    | 0 (0 to 1)    | 0.37 (0.19 to 0.6)  | 0 (0 to 0)    | 0.07 (0.02 to 0.18) |
|                                 | Male   | 2 (1 to 2)       | 4.61 (3.53 to 5.82) | 1 (0 to 1)       | 1.46 (0 to 2.88)    | 0 (0 to 1)    | 0.82 (0.41 to 1.31) | 0 (0 to 0)    | 0.14 (0.03 to 0.33) |
|                                 | Female | 0 (0 to 0)       | 0.34 (0.22 to 0.47) | 0 (0 to 0)       | 0.07 (0 to 0.19)    | 0 (0 to 0)    | 0.01 (0 to 0.01)    | 0 (0 to 0)    | 0.01 (0 to 0.02)    |
| Mongolia                        | Both   | 21 (16 to 28)    | 1.17 (0.78 to 1.53) | 7 (4 to 10)      | 0.34 (0.17 to 0.52) | 0 (0 to 1)    | 0.02 (0.01 to 0.05) | 1 (0 to 1)    | 0.03 (0.01 to 0.06) |
|                                 | Male   | 20 (15 to 27)    | 3 (1.94 to 3.88)    | 7 (4 to 10)      | 0.85 (0.42 to 1.33) | 0 (0 to 1)    | 0.06 (0.02 to 0.11) | 1 (0 to 1)    | 0.06 (0.02 to 0.12) |
|                                 | Female | 1 (1 to 1)       | 0.08 (0.05 to 0.14) | 0 (0 to 0)       | 0.01 (0 to 0.03)    | 0 (0 to 0)    | 0 (0 to 0)          | 0 (0 to 0)    | 0.01 (0 to 0.01)    |

|            |        |                  |                     |                |                     |             |                     |               |                     |
|------------|--------|------------------|---------------------|----------------|---------------------|-------------|---------------------|---------------|---------------------|
| Montenegro | Both   | 37 (30 to 46)    | 3.75 (3 to 4.65)    | 14 (8 to 20)   | 1.45 (0.84 to 2.04) | 0 (0 to 1)  | 0.03 (0.02 to 0.05) | 1 (0 to 2)    | 0.08 (0.02 to 0.19) |
|            | Male   | 31 (25 to 40)    | 6.87 (5.46 to 8.63) | 13 (8 to 19)   | 2.9 (1.69 to 4.07)  | 0 (0 to 0)  | 0.05 (0.02 to 0.09) | 1 (0 to 2)    | 0.14 (0.03 to 0.33) |
|            | Female | 6 (4 to 7)       | 1.12 (0.84 to 1.4)  | 1 (0 to 2)     | 0.22 (0.07 to 0.38) | 0 (0 to 0)  | 0.02 (0.01 to 0.03) | 0 (0 to 0)    | 0.03 (0.01 to 0.06) |
| Morocco    | Both   | 590 (415 to 783) | 1.87 (1.34 to 2.45) | 29 (8 to 57)   | 0.08 (0.02 to 0.16) | 2 (0 to 12) | 0.01 (0 to 0.05)    | 29 (11 to 58) | 0.08 (0.03 to 0.16) |
|            | Male   | 586 (413 to 777) | 3.76 (2.69 to 4.93) | 29 (8 to 57)   | 0.16 (0.05 to 0.32) | 2 (0 to 12) | 0.02 (0 to 0.1)     | 28 (10 to 56) | 0.16 (0.06 to 0.31) |
|            | Female | 4 (2 to 7)       | 0.03 (0.02 to 0.04) | 0 (0 to 0)     | 0 (0 to 0)          | 0 (0 to 0)  | 0 (0 to 0)          | 1 (0 to 3)    | 0.01 (0 to 0.01)    |
| Mozambique | Both   | 77 (49 to 109)   | 0.68 (0.44 to 0.96) | 18 (2 to 38)   | 0.15 (0.02 to 0.31) | 3 (1 to 11) | 0.03 (0.01 to 0.12) | 8 (3 to 15)   | 0.06 (0.02 to 0.11) |
|            | Male   | 73 (47 to 103)   | 1.49 (0.99 to 2.07) | 17 (2 to 35)   | 0.32 (0.03 to 0.65) | 2 (1 to 10) | 0.07 (0.02 to 0.27) | 6 (2 to 12)   | 0.11 (0.04 to 0.2)  |
|            | Female | 4 (2 to 7)       | 0.06 (0.03 to 0.11) | 1 (0 to 3)     | 0.02 (0 to 0.04)    | 0 (0 to 1)  | 0.01 (0 to 0.02)    | 2 (1 to 3)    | 0.02 (0.01 to 0.04) |
| Myanmar    | Both   | 297 (228 to 398) | 0.67 (0.52 to 0.9)  | 65 (33 to 105) | 0.14 (0.07 to 0.22) | 6 (3 to 11) | 0.02 (0.01 to 0.03) | 15 (6 to 30)  | 0.03 (0.01 to 0.06) |
|            | Male   | 256 (197 to 347) | 1.37 (1.05 to 1.83) | 63 (32 to 101) | 0.3 (0.15 to 0.49)  | 6 (2 to 10) | 0.03 (0.02 to 0.07) | 12 (5 to 24)  | 0.05 (0.02 to 0.1)  |
|            | Female | 41 (26 to 59)    | 0.17 (0.11 to 0.24) | 2 (0 to 4)     | 0.01 (0 to 0.02)    | 0 (0 to 1)  | 0 (0 to 0)          | 3 (1 to 6)    | 0.01 (0 to 0.02)    |
| Namibia    | Both   | 18 (12 to 25)    | 1.28 (0.91 to 1.76) | 10 (5 to 15)   | 0.66 (0.34 to 1.01) | 4 (2 to 7)  | 0.32 (0.12 to 0.56) | 0 (0 to 1)    | 0.03 (0.01 to 0.06) |
|            | Male   | 15 (10 to 21)    | 2.65 (1.88 to 3.65) | 9 (5 to 14)    | 1.42 (0.75 to 2.15) | 4 (1 to 7)  | 0.76 (0.28 to 1.36) | 0 (0 to 1)    | 0.06 (0.02 to 0.11) |
|            | Female | 3 (2 to 4)       | 0.33 (0.2 to 0.49)  | 1 (0 to 2)     | 0.1 (0.03 to 0.19)  | 0 (0 to 0)  | 0.02 (0.01 to 0.04) | 0 (0 to 0)    | 0.01 (0 to 0.02)    |
| Nauru      | Both   | 0 (0 to 0)       | 0.75 (0.53 to 0.99) | 0 (0 to 0)     | 0.2 (0.08 to 0.33)  | 0 (0 to 0)  | 0.03 (0.01 to 0.06) | 0 (0 to 0)    | 0.03 (0.01 to 0.05) |
|            | Male   | 0 (0 to 0)       | 1.37 (0.96 to 1.83) | 0 (0 to 0)     | 0.42 (0.18 to 0.7)  | 0 (0 to 0)  | 0.06 (0.02 to 0.12) | 0 (0 to 0)    | 0.05 (0.02 to 0.09) |
|            | Female | 0 (0 to 0)       | 0.21 (0.12 to 0.31) | 0 (0 to 0)     | 0.01 (0 to 0.02)    | 0 (0 to 0)  | 0 (0 to 0.01)       | 0 (0 to 0)    | 0.01 (0 to 0.03)    |
| Nepal      | Both   | 310 (214 to 423) | 1.43 (1 to 1.95)    | 66 (19 to 126) | 0.29 (0.08 to 0.55) | 8 (4 to 16) | 0.04 (0.02 to 0.08) | 24 (10 to 48) | 0.1 (0.04 to 0.2)   |
|            | Male   | 266 (183 to 368) | 2.59 (1.82 to 3.56) | 63 (18 to 119) | 0.57 (0.16 to 1.09) | 7 (3 to 14) | 0.08 (0.03 to 0.16) | 18 (7 to 37)  | 0.16 (0.06 to 0.32) |
|            | Female | 43 (27 to 61)    | 0.39 (0.25 to 0.54) | 3 (1 to 7)     | 0.03 (0 to 0.06)    | 1 (0 to 2)  | 0.01 (0 to 0.02)    | 6 (2 to 11)   | 0.05 (0.02 to 0.09) |

|                 |        |                  |                     |                  |                      |               |                     |              |                     |
|-----------------|--------|------------------|---------------------|------------------|----------------------|---------------|---------------------|--------------|---------------------|
| Netherlands     | Both   | 193 (162 to 222) | 0.56 (0.48 to 0.65) | 86 (51 to 115)   | 0.25 (0.15 to 0.34)  | 48 (28 to 67) | 0.13 (0.08 to 0.18) | 5 (1 to 11)  | 0.02 (0 to 0.04)    |
|                 | Male   | 160 (134 to 185) | 1.02 (0.85 to 1.17) | 74 (45 to 99)    | 0.47 (0.29 to 0.63)  | 45 (26 to 65) | 0.28 (0.16 to 0.4)  | 4 (1 to 10)  | 0.03 (0.01 to 0.06) |
|                 | Female | 33 (21 to 41)    | 0.18 (0.12 to 0.22) | 12 (6 to 18)     | 0.07 (0.03 to 0.1)   | 2 (1 to 4)    | 0.01 (0 to 0.02)    | 1 (0 to 2)   | 0.01 (0 to 0.01)    |
| New Zealand     | Both   | 21 (16 to 25)    | 0.27 (0.21 to 0.32) | 11 (7 to 15)     | 0.14 (0.09 to 0.19)  | 5 (3 to 8)    | 0.06 (0.04 to 0.09) | 1 (0 to 2)   | 0.01 (0 to 0.02)    |
|                 | Male   | 17 (13 to 21)    | 0.46 (0.37 to 0.56) | 9 (6 to 13)      | 0.26 (0.16 to 0.35)  | 5 (3 to 8)    | 0.13 (0.07 to 0.2)  | 1 (0 to 1)   | 0.02 (0 to 0.04)    |
|                 | Female | 4 (3 to 5)       | 0.1 (0.07 to 0.12)  | 2 (1 to 3)       | 0.04 (0.02 to 0.07)  | 0 (0 to 0)    | 0.01 (0 to 0.01)    | 0 (0 to 0)   | 0 (0 to 0.01)       |
| Nicaragua       | Both   | 27 (20 to 35)    | 0.67 (0.49 to 0.88) | 7 (4 to 11)      | 0.17 (0.09 to 0.27)  | 0 (0 to 1)    | 0.01 (0.01 to 0.02) | 2 (1 to 4)   | 0.04 (0.02 to 0.08) |
|                 | Male   | 26 (19 to 35)    | 1.51 (1.11 to 1.98) | 7 (4 to 11)      | 0.37 (0.2 to 0.59)   | 0 (0 to 1)    | 0.03 (0.01 to 0.05) | 2 (1 to 3)   | 0.08 (0.03 to 0.16) |
|                 | Female | 1 (0 to 1)       | 0.03 (0.01 to 0.04) | 0 (0 to 0)       | 0.01 (0 to 0.01)     | 0 (0 to 0)    | 0 (0 to 0)          | 0 (0 to 0)   | 0.01 (0 to 0.01)    |
| Niger           | Both   | 20 (12 to 29)    | 0.31 (0.2 to 0.44)  | 2 (0 to 5)       | 0.02 (0 to 0.06)     | 0 (0 to 1)    | 0.01 (0 to 0.01)    | 2 (1 to 5)   | 0.03 (0.01 to 0.05) |
|                 | Male   | 20 (12 to 29)    | 0.63 (0.4 to 0.9)   | 2 (0 to 4)       | 0.04 (-0.01 to 0.12) | 0 (0 to 1)    | 0.01 (0 to 0.03)    | 2 (1 to 4)   | 0.05 (0.02 to 0.09) |
|                 | Female | 0 (0 to 1)       | 0.01 (0 to 0.01)    | 0 (0 to 0)       | 0 (0 to 0.01)        | 0 (0 to 0)    | 0 (0 to 0)          | 0 (0 to 1)   | 0.01 (0 to 0.01)    |
| Nigeria         | Both   | 234 (137 to 363) | 0.26 (0.16 to 0.4)  | 224 (121 to 358) | 0.26 (0.14 to 0.4)   | 3 (1 to 12)   | 0.01 (0 to 0.02)    | 21 (8 to 43) | 0.02 (0.01 to 0.04) |
|                 | Male   | 232 (135 to 361) | 0.56 (0.33 to 0.86) | 221 (120 to 354) | 0.54 (0.29 to 0.85)  | 3 (1 to 12)   | 0.01 (0 to 0.03)    | 20 (7 to 42) | 0.04 (0.02 to 0.09) |
|                 | Female | 2 (1 to 4)       | 0.01 (0 to 0.01)    | 3 (1 to 6)       | 0.01 (0 to 0.01)     | 0 (0 to 0)    | 0 (0 to 0)          | 1 (0 to 2)   | 0 (0 to 0)          |
| Niue            | Both   | 0 (0 to 0)       | 0.43 (0.31 to 0.56) | 0 (0 to 0)       | 0.11 (0.01 to 0.2)   | 0 (0 to 0)    | 0.01 (0.01 to 0.03) | 0 (0 to 0)   | 0.01 (0.01 to 0.03) |
|                 | Male   | 0 (0 to 0)       | 0.9 (0.65 to 1.19)  | 0 (0 to 0)       | 0.23 (0.03 to 0.44)  | 0 (0 to 0)    | 0.03 (0.01 to 0.07) | 0 (0 to 0)   | 0.02 (0.01 to 0.04) |
|                 | Female | 0 (0 to 0)       | 0.09 (0.05 to 0.13) | 0 (0 to 0)       | 0 (0 to 0.01)        | 0 (0 to 0)    | 0 (0 to 0)          | 0 (0 to 0)   | 0.01 (0 to 0.01)    |
| North Macedonia | Both   | 97 (74 to 125)   | 2.97 (2.28 to 3.81) | 37 (21 to 54)    | 1.14 (0.64 to 1.65)  | 0 (0 to 1)    | 0.01 (0 to 0.02)    | 2 (1 to 5)   | 0.07 (0.01 to 0.16) |
|                 | Male   | 91 (70 to 118)   | 5.84 (4.47 to 7.48) | 37 (21 to 53)    | 2.34 (1.33 to 3.38)  | 0 (0 to 1)    | 0.02 (0.01 to 0.04) | 2 (0 to 5)   | 0.13 (0.03 to 0.3)  |
|                 | Female | 6 (4 to 8)       | 0.36 (0.26 to 0.48) | 0 (0 to 1)       | 0.03 (0 to 0.06)     | 0 (0 to 0)    | 0 (0 to 0.01)       | 0 (0 to 0)   | 0.01 (0 to 0.03)    |

|                          |        |                     |                     |                  |                     |                |                     |                  |                     |
|--------------------------|--------|---------------------|---------------------|------------------|---------------------|----------------|---------------------|------------------|---------------------|
| Northern Mariana Islands | Both   | 0 (0 to 0)          | 0.35 (0.26 to 0.45) | 0 (0 to 0)       | 0.04 (0 to 0.1)     | 0 (0 to 0)     | 0.01 (0 to 0.01)    | 0 (0 to 0)       | 0.02 (0.01 to 0.03) |
|                          | Male   | 0 (0 to 0)          | 0.62 (0.47 to 0.84) | 0 (0 to 0)       | 0.07 (0 to 0.2)     | 0 (0 to 0)     | 0.02 (0.01 to 0.03) | 0 (0 to 0)       | 0.02 (0.01 to 0.04) |
|                          | Female | 0 (0 to 0)          | 0.09 (0.05 to 0.13) | 0 (0 to 0)       | 0 (0 to 0.01)       | 0 (0 to 0)     | 0 (0 to 0)          | 0 (0 to 0)       | 0.01 (0 to 0.02)    |
| Norway                   | Both   | 19 (15 to 23)       | 0.2 (0.16 to 0.24)  | 10 (5 to 14)     | 0.1 (0.06 to 0.15)  | 5 (3 to 8)     | 0.05 (0.03 to 0.07) | 1 (0 to 1)       | 0.01 (0 to 0.02)    |
|                          | Male   | 16 (13 to 20)       | 0.37 (0.28 to 0.44) | 9 (5 to 12)      | 0.19 (0.11 to 0.27) | 5 (3 to 7)     | 0.1 (0.06 to 0.15)  | 1 (0 to 1)       | 0.01 (0 to 0.03)    |
|                          | Female | 3 (2 to 4)          | 0.06 (0.04 to 0.08) | 1 (0 to 2)       | 0.02 (0.01 to 0.04) | 0 (0 to 1)     | 0.01 (0 to 0.02)    | 0 (0 to 0)       | 0 (0 to 0.01)       |
| Oman                     | Both   | 6 (4 to 7)          | 0.4 (0.3 to 0.51)   | 0 (0 to 0)       | 0.01 (0 to 0.02)    | 0 (0 to 1)     | 0.05 (0.02 to 0.08) | 0 (0 to 1)       | 0.01 (0 to 0.02)    |
|                          | Male   | 5 (4 to 7)          | 0.75 (0.57 to 0.97) | 0 (0 to 0)       | 0.02 (0 to 0.03)    | 0 (0 to 1)     | 0.1 (0.05 to 0.16)  | 0 (0 to 0)       | 0.02 (0.01 to 0.04) |
|                          | Female | 0 (0 to 0)          | 0.02 (0.01 to 0.03) | 0 (0 to 0)       | 0 (0 to 0)          | 0 (0 to 0)     | 0 (0 to 0)          | 0 (0 to 0)       | 0 (0 to 0)          |
| Pakistan                 | Both   | 3850 (2780 to 5310) | 3.47 (2.54 to 4.74) | 285 (129 to 495) | 0.23 (0.1 to 0.39)  | 52 (23 to 116) | 0.06 (0.03 to 0.13) | 276 (101 to 557) | 0.21 (0.08 to 0.43) |
|                          | Male   | 3730 (2670 to 5180) | 6.53 (4.77 to 8.97) | 282 (128 to 490) | 0.44 (0.2 to 0.74)  | 46 (18 to 110) | 0.1 (0.04 to 0.24)  | 260 (94 to 530)  | 0.38 (0.14 to 0.77) |
|                          | Female | 127 (72 to 198)     | 0.22 (0.13 to 0.34) | 4 (1 to 7)       | 0.01 (0 to 0.01)    | 7 (2 to 16)    | 0.02 (0 to 0.03)    | 17 (6 to 34)     | 0.03 (0.01 to 0.05) |
| Palau                    | Both   | 0 (0 to 0)          | 0.23 (0.16 to 0.31) | 0 (0 to 0)       | 0.03 (0 to 0.07)    | 0 (0 to 0)     | 0.01 (0 to 0.01)    | 0 (0 to 0)       | 0.01 (0.01 to 0.03) |
|                          | Male   | 0 (0 to 0)          | 0.32 (0.23 to 0.44) | 0 (0 to 0)       | 0.06 (0 to 0.12)    | 0 (0 to 0)     | 0.01 (0 to 0.02)    | 0 (0 to 0)       | 0.01 (0 to 0.02)    |
|                          | Female | 0 (0 to 0)          | 0.15 (0.09 to 0.23) | 0 (0 to 0)       | 0 (0 to 0.02)       | 0 (0 to 0)     | 0 (0 to 0.01)       | 0 (0 to 0)       | 0.02 (0.01 to 0.04) |
| Palestine                | Both   | 16 (13 to 20)       | 0.76 (0.62 to 0.93) | 1 (1 to 2)       | 0.05 (0.03 to 0.08) | 0 (0 to 0)     | 0 (0 to 0.01)       | 0 (0 to 1)       | 0.02 (0.01 to 0.03) |
|                          | Male   | 16 (13 to 20)       | 1.65 (1.33 to 2.02) | 1 (1 to 2)       | 0.11 (0.06 to 0.17) | 0 (0 to 0)     | 0.01 (0 to 0.01)    | 0 (0 to 1)       | 0.03 (0.01 to 0.07) |
|                          | Female | 0 (0 to 0)          | 0.03 (0.02 to 0.04) | 0 (0 to 0)       | 0 (0 to 0)          | 0 (0 to 0)     | 0 (0 to 0)          | 0 (0 to 0)       | 0 (0 to 0)          |
| Panama                   | Both   | 21 (14 to 29)       | 0.51 (0.35 to 0.71) | 9 (5 to 13)      | 0.21 (0.12 to 0.32) | 0 (0 to 1)     | 0.01 (0 to 0.02)    | 1 (1 to 3)       | 0.03 (0.01 to 0.06) |
|                          | Male   | 20 (14 to 28)       | 1.01 (0.69 to 1.39) | 8 (5 to 13)      | 0.42 (0.23 to 0.64) | 0 (0 to 1)     | 0.02 (0.01 to 0.04) | 1 (0 to 2)       | 0.06 (0.02 to 0.12) |
|                          | Female | 1 (1 to 2)          | 0.05 (0.03 to 0.08) | 0 (0 to 1)       | 0.01 (0.01 to 0.02) | 0 (0 to 0)     | 0 (0 to 0)          | 0 (0 to 0)       | 0 (0 to 0.01)       |

|                  |        |                     |                     |                  |                     |                |                     |               |                     |
|------------------|--------|---------------------|---------------------|------------------|---------------------|----------------|---------------------|---------------|---------------------|
| Papua New Guinea | Both   | 17 (11 to 24)       | 0.38 (0.25 to 0.55) | 2 (0 to 5)       | 0.04 (0 to 0.1)     | 1 (0 to 1)     | 0.02 (0.01 to 0.03) | 1 (0 to 1)    | 0.01 (0 to 0.03)    |
|                  | Male   | 14 (9 to 21)        | 0.64 (0.42 to 0.92) | 2 (0 to 5)       | 0.08 (0 to 0.19)    | 1 (0 to 1)     | 0.03 (0.01 to 0.06) | 0 (0 to 1)    | 0.02 (0.01 to 0.03) |
|                  | Female | 3 (1 to 4)          | 0.11 (0.06 to 0.17) | 0 (0 to 0)       | 0 (0 to 0.01)       | 0 (0 to 0)     | 0 (0 to 0)          | 0 (0 to 0)    | 0.01 (0 to 0.02)    |
| Paraguay         | Both   | 60 (43 to 80)       | 1.09 (0.79 to 1.45) | 25 (14 to 39)    | 0.45 (0.25 to 0.68) | 1 (0 to 2)     | 0.02 (0.01 to 0.04) | 4 (1 to 7)    | 0.06 (0.03 to 0.12) |
|                  | Male   | 57 (41 to 76)       | 2.16 (1.58 to 2.87) | 25 (14 to 38)    | 0.91 (0.5 to 1.38)  | 1 (0 to 2)     | 0.05 (0.02 to 0.09) | 3 (1 to 7)    | 0.12 (0.05 to 0.23) |
|                  | Female | 3 (2 to 4)          | 0.11 (0.07 to 0.16) | 1 (0 to 1)       | 0.02 (0.01 to 0.03) | 0 (0 to 0)     | 0 (0 to 0.01)       | 0 (0 to 0)    | 0.01 (0 to 0.01)    |
| Peru             | Both   | 39 (22 to 65)       | 0.12 (0.07 to 0.21) | 28 (12 to 48)    | 0.09 (0.04 to 0.15) | 4 (1 to 7)     | 0.01 (0 to 0.02)    | 6 (2 to 12)   | 0.02 (0.01 to 0.04) |
|                  | Male   | 37 (21 to 61)       | 0.25 (0.14 to 0.41) | 25 (11 to 44)    | 0.17 (0.07 to 0.29) | 3 (1 to 6)     | 0.02 (0.01 to 0.04) | 5 (2 to 10)   | 0.03 (0.01 to 0.06) |
|                  | Female | 2 (1 to 4)          | 0.01 (0.01 to 0.02) | 2 (0 to 4)       | 0.01 (0 to 0.03)    | 0 (0 to 1)     | 0 (0 to 0.01)       | 1 (0 to 2)    | 0.01 (0 to 0.01)    |
| Philippines      | Both   | 471 (352 to 612)    | 0.62 (0.47 to 0.8)  | 161 (91 to 245)  | 0.2 (0.11 to 0.3)   | 5 (2 to 8)     | 0.01 (0 to 0.01)    | 25 (10 to 49) | 0.03 (0.01 to 0.06) |
|                  | Male   | 429 (318 to 563)    | 1.24 (0.93 to 1.61) | 151 (86 to 229)  | 0.4 (0.22 to 0.61)  | 4 (2 to 8)     | 0.02 (0.01 to 0.03) | 22 (8 to 43)  | 0.05 (0.02 to 0.1)  |
|                  | Female | 41 (27 to 57)       | 0.11 (0.08 to 0.15) | 11 (5 to 18)     | 0.03 (0.01 to 0.04) | 0 (0 to 1)     | 0 (0 to 0)          | 4 (1 to 7)    | 0.01 (0 to 0.02)    |
| Poland           | Both   | 1330 (1030 to 1700) | 1.97 (1.51 to 2.52) | 624 (365 to 884) | 0.93 (0.54 to 1.33) | 80 (39 to 136) | 0.11 (0.05 to 0.19) | 40 (9 to 90)  | 0.06 (0.01 to 0.14) |
|                  | Male   | 1220 (923 to 1590)  | 4.09 (3.09 to 5.3)  | 611 (358 to 866) | 2.05 (1.2 to 2.91)  | 78 (36 to 132) | 0.25 (0.12 to 0.43) | 36 (8 to 82)  | 0.12 (0.03 to 0.27) |
|                  | Female | 109 (77 to 144)     | 0.29 (0.21 to 0.39) | 13 (3 to 26)     | 0.04 (0.01 to 0.07) | 3 (1 to 5)     | 0.01 (0 to 0.01)    | 4 (1 to 8)    | 0.01 (0 to 0.02)    |
| Portugal         | Both   | 253 (209 to 293)    | 1.23 (1.02 to 1.42) | 145 (92 to 189)  | 0.7 (0.44 to 0.91)  | 16 (8 to 25)   | 0.06 (0.03 to 0.1)  | 9 (2 to 19)   | 0.05 (0.01 to 0.1)  |
|                  | Male   | 249 (205 to 288)    | 2.65 (2.2 to 3.06)  | 142 (91 to 185)  | 1.51 (0.96 to 1.96) | 15 (7 to 25)   | 0.14 (0.07 to 0.23) | 8 (2 to 19)   | 0.09 (0.02 to 0.21) |
|                  | Female | 4 (3 to 6)          | 0.04 (0.03 to 0.06) | 3 (2 to 5)       | 0.02 (0.01 to 0.04) | 0 (0 to 0)     | 0 (0 to 0)          | 0 (0 to 1)    | 0 (0 to 0.01)       |
| Puerto Rico      | Both   | 35 (24 to 48)       | 0.5 (0.34 to 0.69)  | 12 (6 to 18)     | 0.18 (0.09 to 0.27) | 2 (1 to 3)     | 0.02 (0.01 to 0.04) | 1 (0 to 2)    | 0.01 (0 to 0.03)    |
|                  | Male   | 33 (22 to 45)       | 1.05 (0.72 to 1.44) | 11 (6 to 17)     | 0.38 (0.2 to 0.57)  | 2 (1 to 3)     | 0.05 (0.02 to 0.1)  | 1 (0 to 2)    | 0.03 (0.01 to 0.06) |
|                  | Female | 3 (2 to 4)          | 0.06 (0.04 to 0.1)  | 0 (0 to 1)       | 0.01 (0 to 0.02)    | 0 (0 to 0)     | 0 (0 to 0)          | 0 (0 to 0)    | 0 (0 to 0)          |

|                       |        |                     |                     |                    |                     |                |                     |                |                     |
|-----------------------|--------|---------------------|---------------------|--------------------|---------------------|----------------|---------------------|----------------|---------------------|
| Qatar                 | Both   | 9 (6 to 13)         | 1.91 (1.15 to 2.69) | 0 (0 to 1)         | 0.05 (0.01 to 0.1)  | 0 (0 to 0)     | 0.03 (0.01 to 0.07) | 0 (0 to 1)     | 0.04 (0.01 to 0.08) |
|                       | Male   | 9 (6 to 13)         | 2.5 (1.51 to 3.53)  | 0 (0 to 1)         | 0.07 (0.01 to 0.13) | 0 (0 to 0)     | 0.04 (0.01 to 0.09) | 0 (0 to 1)     | 0.05 (0.02 to 0.11) |
|                       | Female | 0 (0 to 0)          | 0.02 (0.01 to 0.04) | 0 (0 to 0)         | 0 (0 to 0)          | 0 (0 to 0)     | 0 (0 to 0)          | 0 (0 to 0)     | 0 (0 to 0.01)       |
| South Korea           | Both   | 406 (333 to 482)    | 0.45 (0.37 to 0.54) | 161 (97 to 223)    | 0.18 (0.11 to 0.25) | 13 (6 to 22)   | 0.02 (0.01 to 0.03) | 11 (2 to 24)   | 0.01 (0 to 0.03)    |
|                       | Male   | 384 (317 to 455)    | 1.04 (0.86 to 1.24) | 151 (91 to 209)    | 0.4 (0.24 to 0.55)  | 13 (6 to 22)   | 0.04 (0.02 to 0.07) | 10 (2 to 22)   | 0.02 (0.01 to 0.05) |
|                       | Female | 22 (14 to 30)       | 0.04 (0.03 to 0.06) | 10 (5 to 15)       | 0.02 (0.01 to 0.03) | 0 (0 to 1)     | 0 (0 to 0)          | 1 (0 to 2)     | 0 (0 to 0)          |
| Moldova               | Both   | 114 (94 to 135)     | 1.96 (1.61 to 2.3)  | 52 (32 to 70)      | 0.89 (0.56 to 1.2)  | 1 (0 to 1)     | 0.01 (0.01 to 0.02) | 2 (0 to 4)     | 0.03 (0.01 to 0.07) |
|                       | Male   | 113 (93 to 134)     | 4.51 (3.71 to 5.3)  | 51 (32 to 68)      | 2.02 (1.26 to 2.71) | 1 (0 to 1)     | 0.03 (0.01 to 0.05) | 2 (0 to 4)     | 0.07 (0.01 to 0.15) |
|                       | Female | 1 (1 to 1)          | 0.03 (0.02 to 0.04) | 1 (0 to 1)         | 0.03 (0.01 to 0.04) | 0 (0 to 0)     | 0 (0 to 0)          | 0 (0 to 0)     | 0 (0 to 0.01)       |
| Romania               | Both   | 764 (596 to 944)    | 2.27 (1.77 to 2.81) | 384 (229 to 526)   | 1.15 (0.69 to 1.58) | 14 (6 to 24)   | 0.04 (0.02 to 0.07) | 27 (6 to 61)   | 0.08 (0.02 to 0.19) |
|                       | Male   | 741 (579 to 918)    | 4.8 (3.73 to 5.96)  | 375 (225 to 513)   | 2.44 (1.48 to 3.35) | 13 (6 to 24)   | 0.08 (0.04 to 0.15) | 25 (6 to 57)   | 0.17 (0.04 to 0.38) |
|                       | Female | 23 (16 to 31)       | 0.13 (0.09 to 0.18) | 8 (4 to 14)        | 0.05 (0.02 to 0.07) | 1 (0 to 1)     | 0 (0 to 0.01)       | 1 (0 to 3)     | 0.01 (0 to 0.02)    |
| Russia                | Both   | 3240 (2630 to 3950) | 1.38 (1.12 to 1.68) | 1390 (818 to 1910) | 0.59 (0.35 to 0.82) | 82 (41 to 137) | 0.03 (0.02 to 0.06) | 76 (17 to 171) | 0.03 (0.01 to 0.07) |
|                       | Male   | 3180 (2580 to 3880) | 3.41 (2.78 to 4.15) | 1350 (796 to 1870) | 1.43 (0.84 to 1.99) | 78 (38 to 133) | 0.09 (0.04 to 0.15) | 71 (16 to 161) | 0.07 (0.02 to 0.16) |
|                       | Female | 59 (40 to 83)       | 0.05 (0.03 to 0.06) | 37 (16 to 59)      | 0.03 (0.01 to 0.04) | 4 (2 to 7)     | 0 (0 to 0)          | 5 (1 to 11)    | 0 (0 to 0.01)       |
| Rwanda                | Both   | 47 (33 to 66)       | 0.79 (0.57 to 1.11) | 22 (12 to 34)      | 0.35 (0.18 to 0.53) | 1 (0 to 4)     | 0.02 (0.01 to 0.09) | 3 (1 to 6)     | 0.04 (0.02 to 0.08) |
|                       | Male   | 39 (28 to 57)       | 1.61 (1.13 to 2.31) | 20 (11 to 31)      | 0.75 (0.4 to 1.13)  | 1 (0 to 4)     | 0.05 (0.01 to 0.2)  | 2 (1 to 5)     | 0.07 (0.03 to 0.15) |
|                       | Female | 7 (5 to 10)         | 0.22 (0.15 to 0.31) | 2 (1 to 4)         | 0.07 (0.03 to 0.11) | 0 (0 to 1)     | 0.01 (0 to 0.02)    | 1 (0 to 2)     | 0.02 (0.01 to 0.04) |
| Saint Kitts and Nevis | Both   | 1 (0 to 1)          | 0.78 (0.56 to 1)    | 0 (0 to 0)         | 0.21 (0 to 0.49)    | 0 (0 to 0)     | 0.15 (0.08 to 0.24) | 0 (0 to 0)     | 0.06 (0.03 to 0.12) |
|                       | Male   | 1 (0 to 1)          | 1.63 (1.18 to 2.1)  | 0 (0 to 0)         | 0.42 (0 to 1.01)    | 0 (0 to 0)     | 0.33 (0.17 to 0.53) | 0 (0 to 0)     | 0.12 (0.05 to 0.23) |
|                       | Female | 0 (0 to 0)          | 0.01 (0.01 to 0.02) | 0 (0 to 0)         | 0 (0 to 0.01)       | 0 (0 to 0)     | 0 (0 to 0)          | 0 (0 to 0)     | 0 (0 to 0)          |

|                                  |        |               |                     |            |                     |            |                     |            |                     |
|----------------------------------|--------|---------------|---------------------|------------|---------------------|------------|---------------------|------------|---------------------|
| Saint Lucia                      | Both   | 3 (2 to 3)    | 1.16 (0.88 to 1.49) | 1 (1 to 2) | 0.55 (0.31 to 0.79) | 0 (0 to 0) | 0.03 (0.01 to 0.04) | 0 (0 to 0) | 0.07 (0.03 to 0.12) |
|                                  | Male   | 2 (2 to 3)    | 2.39 (1.81 to 3.08) | 1 (1 to 2) | 1.13 (0.63 to 1.61) | 0 (0 to 0) | 0.06 (0.03 to 0.1)  | 0 (0 to 0) | 0.13 (0.05 to 0.24) |
|                                  | Female | 0 (0 to 0)    | 0.07 (0.04 to 0.11) | 0 (0 to 0) | 0.03 (0.01 to 0.05) | 0 (0 to 0) | 0 (0 to 0.01)       | 0 (0 to 0) | 0.01 (0 to 0.02)    |
| Saint Vincent and the Grenadines | Both   | 2 (1 to 2)    | 1.39 (1.04 to 1.79) | 1 (1 to 1) | 0.72 (0.41 to 1)    | 0 (0 to 0) | 0.06 (0.03 to 0.09) | 0 (0 to 0) | 0.1 (0.04 to 0.18)  |
|                                  | Male   | 2 (1 to 2)    | 2.68 (1.98 to 3.43) | 1 (1 to 1) | 1.38 (0.78 to 1.93) | 0 (0 to 0) | 0.11 (0.06 to 0.19) | 0 (0 to 0) | 0.18 (0.07 to 0.34) |
|                                  | Female | 0 (0 to 0)    | 0.05 (0.03 to 0.07) | 0 (0 to 0) | 0.03 (0.01 to 0.04) | 0 (0 to 0) | 0 (0 to 0)          | 0 (0 to 0) | 0.01 (0 to 0.01)    |
| Samoa                            | Both   | 1 (1 to 1)    | 0.53 (0.43 to 0.66) | 0 (0 to 0) | 0.07 (0.02 to 0.13) | 0 (0 to 0) | 0.02 (0.01 to 0.03) | 0 (0 to 0) | 0.01 (0 to 0.02)    |
|                                  | Male   | 1 (0 to 1)    | 0.96 (0.76 to 1.18) | 0 (0 to 0) | 0.15 (0.04 to 0.26) | 0 (0 to 0) | 0.03 (0.01 to 0.05) | 0 (0 to 0) | 0.02 (0.01 to 0.03) |
|                                  | Female | 0 (0 to 0)    | 0.17 (0.11 to 0.24) | 0 (0 to 0) | 0 (0 to 0.01)       | 0 (0 to 0) | 0 (0 to 0.01)       | 0 (0 to 0) | 0.01 (0 to 0.01)    |
| San Marino                       | Both   | 1 (0 to 1)    | 0.96 (0.58 to 1.43) | 0 (0 to 0) | 0.43 (0.01 to 0.78) | 0 (0 to 0) | 0.15 (0.06 to 0.29) | 0 (0 to 0) | 0.03 (0.01 to 0.08) |
|                                  | Male   | 1 (0 to 1)    | 1.96 (1.2 to 2.94)  | 0 (0 to 0) | 0.9 (0.02 to 1.6)   | 0 (0 to 0) | 0.33 (0.14 to 0.63) | 0 (0 to 0) | 0.06 (0.01 to 0.15) |
|                                  | Female | 0 (0 to 0)    | 0.05 (0.03 to 0.07) | 0 (0 to 0) | 0.02 (0 to 0.04)    | 0 (0 to 0) | 0 (0 to 0.01)       | 0 (0 to 0) | 0 (0 to 0)          |
| São Tome and Príncipe            | Both   | 0 (0 to 1)    | 0.36 (0.24 to 0.53) | 0 (0 to 0) | 0.26 (0.14 to 0.38) | 0 (0 to 0) | 0.01 (0 to 0.02)    | 0 (0 to 0) | 0.01 (0.01 to 0.03) |
|                                  | Male   | 0 (0 to 1)    | 0.76 (0.49 to 1.1)  | 0 (0 to 0) | 0.52 (0.28 to 0.77) | 0 (0 to 0) | 0.02 (0.01 to 0.05) | 0 (0 to 0) | 0.03 (0.01 to 0.06) |
|                                  | Female | 0 (0 to 0)    | 0.01 (0.01 to 0.02) | 0 (0 to 0) | 0.02 (0.01 to 0.03) | 0 (0 to 0) | 0 (0 to 0)          | 0 (0 to 0) | 0 (0 to 0)          |
| Saudi Arabia                     | Both   | 73 (53 to 98) | 0.4 (0.3 to 0.53)   | 2 (0 to 4) | 0.01 (0 to 0.02)    | 0 (0 to 0) | 0 (0 to 0)          | 3 (1 to 7) | 0.01 (0.01 to 0.03) |
|                                  | Male   | 71 (52 to 96) | 0.65 (0.48 to 0.87) | 2 (0 to 4) | 0.01 (0 to 0.03)    | 0 (0 to 0) | 0 (0 to 0.01)       | 3 (1 to 7) | 0.02 (0.01 to 0.05) |
|                                  | Female | 2 (1 to 3)    | 0.02 (0.01 to 0.04) | 0 (0 to 0) | 0 (0 to 0)          | 0 (0 to 0) | 0 (0 to 0)          | 0 (0 to 0) | 0 (0 to 0)          |
| Senegal                          | Both   | 33 (21 to 48) | 0.43 (0.29 to 0.63) | 2 (1 to 4) | 0.03 (0.01 to 0.05) | 1 (0 to 2) | 0.01 (0.01 to 0.03) | 2 (1 to 4) | 0.02 (0.01 to 0.05) |
|                                  | Male   | 32 (21 to 47) | 0.89 (0.6 to 1.28)  | 2 (1 to 4) | 0.05 (0.01 to 0.1)  | 1 (0 to 2) | 0.03 (0.01 to 0.06) | 2 (1 to 4) | 0.05 (0.02 to 0.09) |
|                                  | Female | 0 (0 to 0)    | 0.01 (0 to 0.01)    | 0 (0 to 0) | 0 (0 to 0)          | 0 (0 to 0) | 0 (0 to 0)          | 0 (0 to 0) | 0 (0 to 0.01)       |

|                 |        |                  |                     |                 |                     |             |                     |              |                     |
|-----------------|--------|------------------|---------------------|-----------------|---------------------|-------------|---------------------|--------------|---------------------|
| Serbia          | Both   | 355 (268 to 457) | 2.27 (1.72 to 2.91) | 144 (83 to 207) | 0.93 (0.54 to 1.35) | 9 (4 to 17) | 0.05 (0.02 to 0.1)  | 10 (2 to 23) | 0.07 (0.01 to 0.15) |
|                 | Male   | 330 (248 to 426) | 4.54 (3.43 to 5.84) | 140 (81 to 202) | 1.95 (1.13 to 2.81) | 9 (4 to 16) | 0.11 (0.05 to 0.21) | 9 (2 to 21)  | 0.13 (0.03 to 0.3)  |
|                 | Female | 25 (18 to 34)    | 0.31 (0.22 to 0.41) | 3 (1 to 6)      | 0.04 (0.02 to 0.07) | 0 (0 to 1)  | 0 (0 to 0.01)       | 1 (0 to 2)   | 0.01 (0 to 0.02)    |
| Seychelles      | Both   | 4 (3 to 5)       | 3.76 (3.06 to 4.58) | 2 (1 to 2)      | 1.32 (0.72 to 1.94) | 0 (0 to 0)  | 0.06 (0.03 to 0.12) | 0 (0 to 0)   | 0.14 (0.06 to 0.28) |
|                 | Male   | 4 (3 to 5)       | 8.17 (6.63 to 9.9)  | 1 (1 to 2)      | 2.77 (1.51 to 4.06) | 0 (0 to 0)  | 0.15 (0.06 to 0.3)  | 0 (0 to 0)   | 0.27 (0.1 to 0.52)  |
|                 | Female | 0 (0 to 0)       | 0.14 (0.09 to 0.21) | 0 (0 to 0)      | 0.03 (0.01 to 0.06) | 0 (0 to 0)  | 0 (0 to 0.01)       | 0 (0 to 0)   | 0.02 (0.01 to 0.03) |
| Sierra Leone    | Both   | 20 (13 to 28)    | 0.56 (0.37 to 0.81) | 8 (4 to 14)     | 0.24 (0.12 to 0.39) | 0 (0 to 1)  | 0.01 (0 to 0.02)    | 1 (0 to 2)   | 0.02 (0.01 to 0.05) |
|                 | Male   | 19 (12 to 28)    | 1.11 (0.73 to 1.58) | 8 (4 to 13)     | 0.45 (0.22 to 0.75) | 0 (0 to 1)  | 0.02 (0.01 to 0.04) | 1 (0 to 2)   | 0.04 (0.02 to 0.08) |
|                 | Female | 0 (0 to 1)       | 0.02 (0.01 to 0.04) | 0 (0 to 1)      | 0.03 (0.01 to 0.05) | 0 (0 to 0)  | 0 (0 to 0)          | 0 (0 to 0)   | 0.01 (0 to 0.01)    |
| Singapore       | Both   | 20 (15 to 24)    | 0.26 (0.2 to 0.31)  | 3 (1 to 5)      | 0.03 (0.01 to 0.06) | 2 (1 to 4)  | 0.03 (0.02 to 0.05) | 1 (0 to 1)   | 0.01 (0 to 0.02)    |
|                 | Male   | 18 (15 to 22)    | 0.52 (0.4 to 0.64)  | 3 (1 to 5)      | 0.07 (0.02 to 0.12) | 2 (1 to 3)  | 0.07 (0.04 to 0.12) | 1 (0 to 1)   | 0.01 (0 to 0.03)    |
|                 | Female | 1 (1 to 2)       | 0.03 (0.02 to 0.04) | 0 (0 to 0)      | 0 (0 to 0.01)       | 0 (0 to 0)  | 0 (0 to 0)          | 0 (0 to 0)   | 0 (0 to 0)          |
| Slovakia        | Both   | 130 (95 to 170)  | 1.42 (1.03 to 1.87) | 68 (41 to 98)   | 0.75 (0.45 to 1.08) | 3 (1 to 5)  | 0.03 (0.01 to 0.05) | 5 (1 to 11)  | 0.05 (0.01 to 0.12) |
|                 | Male   | 126 (92 to 165)  | 3.09 (2.27 to 4.04) | 67 (40 to 96)   | 1.65 (0.99 to 2.37) | 2 (1 to 5)  | 0.06 (0.03 to 0.12) | 4 (1 to 10)  | 0.11 (0.02 to 0.25) |
|                 | Female | 4 (2 to 5)       | 0.08 (0.05 to 0.11) | 1 (0 to 2)      | 0.02 (0.01 to 0.04) | 0 (0 to 0)  | 0 (0 to 0)          | 0 (0 to 0)   | 0 (0 to 0.01)       |
| Slovenia        | Both   | 38 (27 to 52)    | 0.94 (0.68 to 1.29) | 14 (5 to 23)    | 0.34 (0.13 to 0.56) | 5 (2 to 8)  | 0.1 (0.05 to 0.19)  | 1 (0 to 3)   | 0.03 (0.01 to 0.07) |
|                 | Male   | 35 (25 to 48)    | 1.87 (1.34 to 2.56) | 14 (5 to 22)    | 0.73 (0.28 to 1.18) | 4 (2 to 8)  | 0.23 (0.1 to 0.42)  | 1 (0 to 3)   | 0.06 (0.01 to 0.14) |
|                 | Female | 3 (2 to 4)       | 0.15 (0.09 to 0.21) | 0 (0 to 1)      | 0.02 (0 to 0.05)    | 0 (0 to 0)  | 0.01 (0 to 0.01)    | 0 (0 to 0)   | 0.01 (0 to 0.01)    |
| Solomon Islands | Both   | 3 (2 to 3)       | 0.88 (0.6 to 1.17)  | 0 (0 to 1)      | 0.07 (0 to 0.15)    | 0 (0 to 0)  | 0.03 (0.01 to 0.06) | 0 (0 to 0)   | 0.04 (0.02 to 0.08) |
|                 | Male   | 2 (1 to 3)       | 1.5 (0.97 to 2)     | 0 (0 to 1)      | 0.13 (0 to 0.29)    | 0 (0 to 0)  | 0.06 (0.02 to 0.12) | 0 (0 to 0)   | 0.05 (0.02 to 0.11) |
|                 | Female | 0 (0 to 1)       | 0.24 (0.14 to 0.34) | 0 (0 to 0)      | 0 (0 to 0.01)       | 0 (0 to 0)  | 0.01 (0 to 0.01)    | 0 (0 to 0)   | 0.03 (0.01 to 0.06) |



|              |        |                    |                     |                  |                      |                 |                     |              |                     |
|--------------|--------|--------------------|---------------------|------------------|----------------------|-----------------|---------------------|--------------|---------------------|
| Somalia      | Both   | 36 (21 to 54)      | 0.51 (0.31 to 0.77) | 0 (0 to 0)       | 0 (0 to 0)           | 1 (0 to 4)      | 0.02 (0 to 0.07)    | 4 (2 to 9)   | 0.05 (0.02 to 0.1)  |
|              | Male   | 34 (20 to 51)      | 1.14 (0.7 to 1.7)   | 0 (0 to 0)       | 0 (0 to 0)           | 1 (0 to 3)      | 0.03 (0 to 0.16)    | 3 (1 to 7)   | 0.09 (0.03 to 0.18) |
|              | Female | 2 (1 to 4)         | 0.06 (0.03 to 0.11) | 0 (0 to 0)       | 0 (0 to 0)           | 0 (0 to 1)      | 0.01 (0 to 0.02)    | 1 (0 to 2)   | 0.02 (0.01 to 0.05) |
| South Africa | Both   | 346 (278 to 413)   | 0.76 (0.61 to 0.9)  | 159 (96 to 218)  | 0.34 (0.21 to 0.47)  | 44 (24 to 65)   | 0.11 (0.06 to 0.16) | 9 (3 to 17)  | 0.02 (0.01 to 0.03) |
|              | Male   | 319 (255 to 378)   | 1.69 (1.35 to 2.01) | 149 (91 to 203)  | 0.77 (0.46 to 1.05)  | 41 (22 to 62)   | 0.27 (0.15 to 0.4)  | 8 (3 to 15)  | 0.04 (0.01 to 0.07) |
|              | Female | 27 (20 to 36)      | 0.11 (0.08 to 0.14) | 10 (5 to 15)     | 0.04 (0.02 to 0.06)  | 3 (1 to 4)      | 0.01 (0 to 0.02)    | 1 (0 to 2)   | 0 (0 to 0.01)       |
| South Sudan  | Both   | 14 (8 to 23)       | 0.38 (0.22 to 0.6)  | 1 (0 to 2)       | 0.02 (-0.01 to 0.05) | 0 (0 to 2)      | 0.01 (0 to 0.05)    | 1 (0 to 3)   | 0.03 (0.01 to 0.06) |
|              | Male   | 14 (8 to 22)       | 0.68 (0.4 to 1.08)  | 1 (0 to 2)       | 0.03 (-0.01 to 0.09) | 0 (0 to 2)      | 0.01 (0 to 0.1)     | 1 (0 to 2)   | 0.04 (0.01 to 0.09) |
|              | Female | 1 (0 to 1)         | 0.04 (0.02 to 0.07) | 0 (0 to 0)       | 0 (0 to 0.01)        | 0 (0 to 0)      | 0.01 (0 to 0.01)    | 0 (0 to 1)   | 0.01 (0 to 0.03)    |
| Spain        | Both   | 1110 (934 to 1270) | 1.23 (1.05 to 1.41) | 469 (287 to 630) | 0.53 (0.33 to 0.71)  | 120 (61 to 194) | 0.12 (0.06 to 0.19) | 24 (5 to 53) | 0.03 (0.01 to 0.07) |
|              | Male   | 1070 (902 to 1230) | 2.61 (2.22 to 2.98) | 457 (281 to 612) | 1.12 (0.69 to 1.5)   | 118 (59 to 193) | 0.26 (0.13 to 0.43) | 23 (5 to 51) | 0.06 (0.01 to 0.13) |
|              | Female | 35 (25 to 45)      | 0.08 (0.06 to 0.1)  | 13 (6 to 20)     | 0.03 (0.01 to 0.04)  | 2 (1 to 3)      | 0 (0 to 0.01)       | 1 (0 to 2)   | 0 (0 to 0.01)       |
| Sri Lanka    | Both   | 89 (57 to 127)     | 0.35 (0.23 to 0.5)  | 37 (19 to 59)    | 0.14 (0.07 to 0.22)  | 3 (1 to 6)      | 0.01 (0.01 to 0.02) | 6 (2 to 11)  | 0.02 (0.01 to 0.04) |
|              | Male   | 85 (56 to 121)     | 0.77 (0.51 to 1.08) | 35 (18 to 56)    | 0.3 (0.16 to 0.48)   | 3 (1 to 5)      | 0.03 (0.01 to 0.06) | 5 (2 to 10)  | 0.04 (0.01 to 0.08) |
|              | Female | 4 (2 to 7)         | 0.03 (0.02 to 0.05) | 1 (1 to 2)       | 0.01 (0 to 0.02)     | 0 (0 to 1)      | 0 (0 to 0.01)       | 1 (0 to 2)   | 0.01 (0 to 0.01)    |
| Sudan        | Both   | 218 (143 to 301)   | 1.23 (0.81 to 1.7)  | 0 (0 to 1)       | 0 (0 to 0.01)        | 1 (0 to 4)      | 0.01 (0 to 0.02)    | 11 (4 to 20) | 0.05 (0.02 to 0.1)  |
|              | Male   | 209 (137 to 291)   | 2.18 (1.43 to 3.03) | 0 (0 to 1)       | 0 (0 to 0.01)        | 1 (0 to 3)      | 0.01 (0 to 0.04)    | 10 (4 to 18) | 0.09 (0.03 to 0.16) |
|              | Female | 9 (5 to 14)        | 0.1 (0.06 to 0.17)  | 0 (0 to 0)       | 0 (0 to 0)           | 0 (0 to 0)      | 0 (0 to 0)          | 1 (0 to 2)   | 0.01 (0 to 0.02)    |
| Suriname     | Both   | 3 (2 to 4)         | 0.54 (0.4 to 0.7)   | 1 (1 to 2)       | 0.17 (0.09 to 0.26)  | 0 (0 to 0)      | 0.01 (0 to 0.02)    | 0 (0 to 0)   | 0.03 (0.01 to 0.05) |
|              | Male   | 3 (2 to 4)         | 1.1 (0.82 to 1.43)  | 1 (1 to 2)       | 0.36 (0.19 to 0.54)  | 0 (0 to 0)      | 0.02 (0.01 to 0.04) | 0 (0 to 0)   | 0.06 (0.02 to 0.1)  |
|              | Female | 0 (0 to 0)         | 0.07 (0.05 to 0.11) | 0 (0 to 0)       | 0.02 (0.01 to 0.03)  | 0 (0 to 0)      | 0 (0 to 0)          | 0 (0 to 0)   | 0 (0 to 0.01)       |

|                            |        |                   |                     |                  |                     |              |                     |               |                     |
|----------------------------|--------|-------------------|---------------------|------------------|---------------------|--------------|---------------------|---------------|---------------------|
| Sweden                     | Both   | 49 (39 to 58)     | 0.23 (0.18 to 0.27) | 22 (13 to 31)    | 0.11 (0.06 to 0.15) | 10 (5 to 14) | 0.04 (0.02 to 0.06) | 1 (0 to 3)    | 0.01 (0 to 0.01)    |
|                            | Male   | 40 (31 to 48)     | 0.4 (0.31 to 0.48)  | 19 (11 to 26)    | 0.19 (0.11 to 0.26) | 9 (5 to 14)  | 0.08 (0.05 to 0.12) | 1 (0 to 2)    | 0.01 (0 to 0.02)    |
|                            | Female | 9 (7 to 11)       | 0.08 (0.07 to 0.1)  | 4 (2 to 5)       | 0.03 (0.02 to 0.05) | 0 (0 to 1)   | 0 (0 to 0.01)       | 0 (0 to 0)    | 0 (0 to 0.01)       |
| Switzerland                | Both   | 77 (65 to 89)     | 0.45 (0.38 to 0.51) | 35 (22 to 48)    | 0.21 (0.13 to 0.28) | 16 (9 to 24) | 0.08 (0.05 to 0.13) | 2 (1 to 5)    | 0.01 (0 to 0.03)    |
|                            | Male   | 66 (56 to 76)     | 0.83 (0.7 to 0.96)  | 30 (19 to 41)    | 0.39 (0.24 to 0.52) | 15 (9 to 23) | 0.19 (0.1 to 0.28)  | 2 (0 to 4)    | 0.03 (0.01 to 0.06) |
|                            | Female | 11 (9 to 14)      | 0.12 (0.09 to 0.15) | 5 (3 to 7)       | 0.05 (0.03 to 0.08) | 1 (0 to 1)   | 0.01 (0 to 0.01)    | 0 (0 to 1)    | 0 (0 to 0.01)       |
| Syria                      | Both   | 71 (52 to 97)     | 0.63 (0.47 to 0.84) | 3 (1 to 5)       | 0.02 (0.01 to 0.04) | 0 (0 to 1)   | 0 (0 to 0.01)       | 3 (1 to 5)    | 0.02 (0.01 to 0.04) |
|                            | Male   | 68 (50 to 93)     | 1.13 (0.84 to 1.53) | 3 (1 to 5)       | 0.04 (0.02 to 0.08) | 0 (0 to 1)   | 0.01 (0 to 0.02)    | 3 (1 to 5)    | 0.04 (0.01 to 0.07) |
|                            | Female | 3 (2 to 5)        | 0.06 (0.03 to 0.09) | 0 (0 to 0)       | 0 (0 to 0)          | 0 (0 to 0)   | 0 (0 to 0)          | 0 (0 to 0)    | 0 (0 to 0)          |
| Taiwan (Province of China) | Both   | 204 (155 to 273)  | 0.51 (0.39 to 0.69) | 59 (32 to 91)    | 0.15 (0.08 to 0.23) | 4 (2 to 7)   | 0.01 (0 to 0.02)    | 10 (4 to 20)  | 0.03 (0.01 to 0.05) |
|                            | Male   | 203 (154 to 271)  | 1.1 (0.84 to 1.47)  | 59 (32 to 90)    | 0.32 (0.17 to 0.48) | 4 (1 to 7)   | 0.02 (0.01 to 0.04) | 10 (4 to 19)  | 0.05 (0.02 to 0.1)  |
|                            | Female | 1 (1 to 2)        | 0.01 (0 to 0.01)    | 0 (0 to 1)       | 0 (0 to 0)          | 0 (0 to 1)   | 0 (0 to 0)          | 1 (0 to 1)    | 0 (0 to 0.01)       |
| Tajikistan                 | Both   | 25 (18 to 39)     | 0.52 (0.38 to 0.8)  | 5 (2 to 9)       | 0.09 (0.04 to 0.16) | 0 (0 to 1)   | 0.01 (0 to 0.02)    | 1 (0 to 2)    | 0.02 (0.01 to 0.04) |
|                            | Male   | 24 (17 to 37)     | 1.08 (0.77 to 1.64) | 5 (2 to 8)       | 0.17 (0.08 to 0.3)  | 0 (0 to 1)   | 0.01 (0.01 to 0.03) | 1 (0 to 2)    | 0.03 (0.01 to 0.06) |
|                            | Female | 1 (1 to 2)        | 0.04 (0.03 to 0.07) | 0 (0 to 1)       | 0.01 (0 to 0.02)    | 0 (0 to 0)   | 0 (0 to 0.01)       | 0 (0 to 1)    | 0.01 (0 to 0.02)    |
| Thailand                   | Both   | 817 (585 to 1110) | 0.8 (0.57 to 1.07)  | 331 (181 to 506) | 0.32 (0.18 to 0.48) | 18 (7 to 35) | 0.02 (0.01 to 0.04) | 41 (16 to 78) | 0.04 (0.01 to 0.07) |
|                            | Male   | 797 (569 to 1080) | 1.74 (1.25 to 2.33) | 326 (178 to 499) | 0.69 (0.38 to 1.04) | 18 (7 to 35) | 0.04 (0.02 to 0.08) | 37 (14 to 72) | 0.07 (0.03 to 0.14) |
|                            | Female | 20 (12 to 32)     | 0.04 (0.02 to 0.06) | 6 (2 to 10)      | 0.01 (0 to 0.02)    | 0 (0 to 0)   | 0 (0 to 0)          | 4 (1 to 7)    | 0.01 (0 to 0.01)    |
| Timor-Leste                | Both   | 5 (3 to 7)        | 0.65 (0.43 to 0.93) | 1 (0 to 2)       | 0.14 (0.05 to 0.24) | 0 (0 to 0)   | 0.01 (0 to 0.02)    | 0 (0 to 0)    | 0.03 (0.01 to 0.05) |
|                            | Male   | 5 (3 to 7)        | 1.24 (0.82 to 1.79) | 1 (0 to 2)       | 0.27 (0.11 to 0.48) | 0 (0 to 0)   | 0.02 (0.01 to 0.05) | 0 (0 to 0)    | 0.04 (0.02 to 0.09) |
|                            | Female | 0 (0 to 0)        | 0.06 (0.03 to 0.1)  | 0 (0 to 0)       | 0.01 (0 to 0.02)    | 0 (0 to 0)   | 0 (0 to 0)          | 0 (0 to 0)    | 0.01 (0 to 0.03)    |

|                     |        |                    |                     |                |                     |                 |                     |               |                     |
|---------------------|--------|--------------------|---------------------|----------------|---------------------|-----------------|---------------------|---------------|---------------------|
| Togo                | Both   | 26 (18 to 35)      | 0.73 (0.5 to 0.98)  | 7 (3 to 12)    | 0.18 (0.08 to 0.31) | 0 (0 to 1)      | 0.01 (0.01 to 0.03) | 1 (1 to 3)    | 0.03 (0.01 to 0.06) |
|                     | Male   | 25 (17 to 34)      | 1.72 (1.2 to 2.33)  | 7 (3 to 12)    | 0.42 (0.17 to 0.7)  | 0 (0 to 1)      | 0.03 (0.01 to 0.07) | 1 (0 to 3)    | 0.06 (0.02 to 0.13) |
|                     | Female | 1 (0 to 1)         | 0.04 (0.02 to 0.06) | 0 (0 to 1)     | 0.01 (0 to 0.03)    | 0 (0 to 0)      | 0 (0 to 0)          | 0 (0 to 0)    | 0.01 (0 to 0.01)    |
| Tokelau             | Both   | 0 (0 to 0)         | 0.34 (0.25 to 0.45) | 0 (0 to 0)     | 0.06 (0.02 to 0.11) | 0 (0 to 0)      | 0.01 (0 to 0.02)    | 0 (0 to 0)    | 0.01 (0 to 0.02)    |
|                     | Male   | 0 (0 to 0)         | 0.58 (0.42 to 0.76) | 0 (0 to 0)     | 0.12 (0.04 to 0.21) | 0 (0 to 0)      | 0.02 (0.01 to 0.03) | 0 (0 to 0)    | 0.01 (0.01 to 0.03) |
|                     | Female | 0 (0 to 0)         | 0.12 (0.07 to 0.18) | 0 (0 to 0)     | 0 (0 to 0.01)       | 0 (0 to 0)      | 0 (0 to 0.01)       | 0 (0 to 0)    | 0.01 (0 to 0.02)    |
| Tonga               | Both   | 0 (0 to 0)         | 0.46 (0.35 to 0.6)  | 0 (0 to 0)     | 0.04 (0 to 0.08)    | 0 (0 to 0)      | 0.01 (0.01 to 0.02) | 0 (0 to 0)    | 0.01 (0 to 0.02)    |
|                     | Male   | 0 (0 to 0)         | 0.96 (0.74 to 1.25) | 0 (0 to 0)     | 0.08 (0 to 0.17)    | 0 (0 to 0)      | 0.03 (0.01 to 0.05) | 0 (0 to 0)    | 0.02 (0.01 to 0.03) |
|                     | Female | 0 (0 to 0)         | 0.07 (0.04 to 0.11) | 0 (0 to 0)     | 0 (0 to 0)          | 0 (0 to 0)      | 0 (0 to 0)          | 0 (0 to 0)    | 0.01 (0 to 0.01)    |
| Trinidad and Tobago | Both   | 10 (7 to 14)       | 0.54 (0.37 to 0.74) | 4 (2 to 6)     | 0.21 (0.11 to 0.33) | 0 (0 to 0)      | 0.01 (0.01 to 0.03) | 1 (0 to 1)    | 0.03 (0.01 to 0.06) |
|                     | Male   | 10 (7 to 13)       | 1.1 (0.77 to 1.52)  | 4 (2 to 6)     | 0.44 (0.22 to 0.67) | 0 (0 to 0)      | 0.03 (0.01 to 0.06) | 1 (0 to 1)    | 0.06 (0.02 to 0.12) |
|                     | Female | 0 (0 to 0)         | 0.03 (0.02 to 0.05) | 0 (0 to 0)     | 0.01 (0 to 0.02)    | 0 (0 to 0)      | 0 (0 to 0)          | 0 (0 to 0)    | 0 (0 to 0.01)       |
| Tunisia             | Both   | 243 (169 to 341)   | 1.94 (1.36 to 2.69) | 21 (9 to 36)   | 0.16 (0.07 to 0.27) | 1 (0 to 4)      | 0.01 (0 to 0.04)    | 8 (3 to 15)   | 0.06 (0.02 to 0.11) |
|                     | Male   | 240 (167 to 337)   | 3.99 (2.81 to 5.53) | 21 (9 to 36)   | 0.32 (0.14 to 0.55) | 1 (0 to 4)      | 0.02 (0 to 0.09)    | 8 (3 to 15)   | 0.11 (0.04 to 0.23) |
|                     | Female | 3 (2 to 5)         | 0.05 (0.03 to 0.07) | 0 (0 to 1)     | 0.01 (0 to 0.01)    | 0 (0 to 0)      | 0 (0 to 0)          | 0 (0 to 0)    | 0 (0 to 0.01)       |
| Turkey              | Both   | 1080 (815 to 1390) | 1.23 (0.94 to 1.58) | 88 (42 to 144) | 0.1 (0.05 to 0.16)  | 103 (45 to 176) | 0.12 (0.05 to 0.21) | 42 (16 to 84) | 0.04 (0.02 to 0.09) |
|                     | Male   | 1040 (777 to 1330) | 2.55 (1.93 to 3.25) | 83 (40 to 136) | 0.19 (0.09 to 0.31) | 97 (42 to 168)  | 0.25 (0.11 to 0.44) | 39 (15 to 79) | 0.09 (0.03 to 0.18) |
|                     | Female | 49 (32 to 67)      | 0.1 (0.07 to 0.14)  | 5 (2 to 9)     | 0.01 (0 to 0.02)    | 6 (2 to 12)     | 0.01 (0.01 to 0.03) | 2 (1 to 5)    | 0.01 (0 to 0.01)    |
| Turkmenistan        | Both   | 21 (16 to 28)      | 0.52 (0.39 to 0.69) | 8 (4 to 11)    | 0.17 (0.09 to 0.26) | 0 (0 to 1)      | 0.01 (0 to 0.02)    | 1 (0 to 2)    | 0.03 (0.01 to 0.05) |
|                     | Male   | 20 (15 to 27)      | 1.14 (0.84 to 1.51) | 7 (4 to 10)    | 0.37 (0.19 to 0.54) | 0 (0 to 0)      | 0.01 (0.01 to 0.02) | 1 (0 to 2)    | 0.05 (0.02 to 0.09) |
|                     | Female | 1 (1 to 2)         | 0.05 (0.03 to 0.08) | 0 (0 to 1)     | 0.02 (0 to 0.04)    | 0 (0 to 0)      | 0.01 (0 to 0.02)    | 0 (0 to 0)    | 0.01 (0 to 0.02)    |

|                      |        |                     |                     |                  |                     |                  |                     |              |                     |
|----------------------|--------|---------------------|---------------------|------------------|---------------------|------------------|---------------------|--------------|---------------------|
| Tuvalu               | Both   | 0 (0 to 0)          | 0.58 (0.4 to 0.79)  | 0 (0 to 0)       | 0.06 (0.01 to 0.14) | 0 (0 to 0)       | 0.02 (0.01 to 0.04) | 0 (0 to 0)   | 0.02 (0.01 to 0.04) |
|                      | Male   | 0 (0 to 0)          | 1.09 (0.73 to 1.51) | 0 (0 to 0)       | 0.14 (0.03 to 0.28) | 0 (0 to 0)       | 0.04 (0.02 to 0.09) | 0 (0 to 0)   | 0.03 (0.01 to 0.07) |
|                      | Female | 0 (0 to 0)          | 0.14 (0.09 to 0.22) | 0 (0 to 0)       | 0 (0 to 0.01)       | 0 (0 to 0)       | 0 (0 to 0.01)       | 0 (0 to 0)   | 0.01 (0 to 0.02)    |
| Uganda               | Both   | 63 (39 to 92)       | 0.44 (0.28 to 0.64) | 60 (34 to 89)    | 0.4 (0.22 to 0.59)  | 2 (1 to 10)      | 0.02 (0.01 to 0.08) | 8 (3 to 15)  | 0.05 (0.02 to 0.09) |
|                      | Male   | 56 (35 to 81)       | 0.9 (0.58 to 1.28)  | 52 (30 to 76)    | 0.78 (0.45 to 1.13) | 1 (0 to 9)       | 0.03 (0.01 to 0.19) | 6 (2 to 11)  | 0.08 (0.03 to 0.15) |
|                      | Female | 7 (3 to 11)         | 0.09 (0.05 to 0.15) | 8 (4 to 13)      | 0.1 (0.05 to 0.16)  | 1 (0 to 1)       | 0.01 (0 to 0.02)    | 2 (1 to 4)   | 0.02 (0.01 to 0.04) |
| Ukraine              | Both   | 1360 (1030 to 1730) | 1.86 (1.4 to 2.37)  | 541 (301 to 786) | 0.75 (0.42 to 1.09) | 36 (17 to 63)    | 0.05 (0.02 to 0.08) | 30 (7 to 68) | 0.04 (0.01 to 0.1)  |
|                      | Male   | 1350 (1020 to 1720) | 4.55 (3.45 to 5.77) | 532 (296 to 774) | 1.79 (0.99 to 2.61) | 35 (16 to 61)    | 0.12 (0.05 to 0.21) | 29 (6 to 66) | 0.1 (0.02 to 0.22)  |
|                      | Female | 10 (6 to 16)        | 0.03 (0.02 to 0.04) | 8 (4 to 14)      | 0.02 (0.01 to 0.04) | 1 (0 to 3)       | 0 (0 to 0.01)       | 1 (0 to 2)   | 0 (0 to 0.01)       |
| United Arab Emirates | Both   | 80 (49 to 126)      | 1.83 (1.22 to 2.61) | 11 (3 to 21)     | 0.16 (0.04 to 0.31) | 0 (0 to 1)       | 0.01 (0 to 0.06)    | 7 (2 to 14)  | 0.08 (0.03 to 0.17) |
|                      | Male   | 78 (48 to 123)      | 2.5 (1.68 to 3.57)  | 11 (3 to 21)     | 0.21 (0.06 to 0.41) | 0 (0 to 1)       | 0.01 (0 to 0.08)    | 6 (2 to 13)  | 0.11 (0.04 to 0.22) |
|                      | Female | 2 (1 to 3)          | 0.15 (0.08 to 0.24) | 0 (0 to 0)       | 0.01 (0 to 0.02)    | 0 (0 to 0)       | 0 (0 to 0.01)       | 0 (0 to 0)   | 0.01 (0 to 0.02)    |
| United Kingdom       | Both   | 670 (551 to 768)    | 0.53 (0.44 to 0.61) | 266 (152 to 374) | 0.22 (0.13 to 0.3)  | 179 (108 to 252) | 0.13 (0.08 to 0.18) | 18 (4 to 41) | 0.02 (0 to 0.04)    |
|                      | Male   | 548 (449 to 629)    | 0.95 (0.78 to 1.08) | 236 (138 to 326) | 0.42 (0.24 to 0.57) | 166 (96 to 237)  | 0.27 (0.16 to 0.39) | 16 (4 to 35) | 0.03 (0.01 to 0.06) |
|                      | Female | 122 (91 to 143)     | 0.18 (0.14 to 0.21) | 30 (12 to 49)    | 0.05 (0.02 to 0.08) | 14 (5 to 22)     | 0.02 (0.01 to 0.03) | 3 (1 to 6)   | 0.01 (0 to 0.01)    |
| Tanzania             | Both   | 147 (97 to 216)     | 0.6 (0.4 to 0.86)   | 83 (45 to 130)   | 0.33 (0.18 to 0.5)  | 4 (1 to 20)      | 0.02 (0 to 0.1)     | 13 (5 to 26) | 0.05 (0.02 to 0.09) |
|                      | Male   | 133 (89 to 199)     | 1.14 (0.78 to 1.66) | 75 (41 to 115)   | 0.61 (0.34 to 0.94) | 3 (0 to 19)      | 0.03 (0.01 to 0.2)  | 10 (4 to 21) | 0.07 (0.03 to 0.15) |
|                      | Female | 14 (8 to 22)        | 0.11 (0.06 to 0.17) | 8 (4 to 14)      | 0.06 (0.03 to 0.11) | 1 (0 to 2)       | 0.01 (0 to 0.02)    | 3 (1 to 6)   | 0.02 (0.01 to 0.04) |
| Virgin Islands       | Both   | 2 (1 to 3)          | 1.06 (0.76 to 1.39) | 1 (0 to 1)       | 0.38 (0 to 0.75)    | 0 (0 to 0)       | 0.15 (0.07 to 0.26) | 0 (0 to 0)   | 0.07 (0.03 to 0.13) |
|                      | Male   | 2 (1 to 3)          | 2.27 (1.63 to 2.98) | 1 (0 to 1)       | 0.82 (0 to 1.62)    | 0 (0 to 0)       | 0.35 (0.17 to 0.6)  | 0 (0 to 0)   | 0.14 (0.05 to 0.27) |
|                      | Female | 0 (0 to 0)          | 0.09 (0.06 to 0.13) | 0 (0 to 0)       | 0.03 (0 to 0.06)    | 0 (0 to 0)       | 0 (0 to 0.01)       | 0 (0 to 0)   | 0.01 (0 to 0.01)    |

|                          |        |                     |                     |                    |                     |                  |                     |                 |                     |
|--------------------------|--------|---------------------|---------------------|--------------------|---------------------|------------------|---------------------|-----------------|---------------------|
| United States of America | Both   | 3560 (2890 to 4090) | 0.64 (0.52 to 0.73) | 1200 (694 to 1640) | 0.22 (0.13 to 0.3)  | 407 (223 to 605) | 0.07 (0.04 to 0.1)  | 139 (34 to 304) | 0.03 (0.01 to 0.06) |
|                          | Male   | 2910 (2370 to 3330) | 1.13 (0.92 to 1.3)  | 1040 (608 to 1410) | 0.41 (0.24 to 0.55) | 385 (204 to 583) | 0.15 (0.08 to 0.23) | 112 (27 to 245) | 0.04 (0.01 to 0.1)  |
|                          | Female | 650 (523 to 767)    | 0.22 (0.17 to 0.25) | 164 (84 to 244)    | 0.06 (0.03 to 0.08) | 22 (10 to 36)    | 0.01 (0 to 0.01)    | 27 (6 to 60)    | 0.01 (0 to 0.02)    |
| Uruguay                  | Both   | 89 (73 to 105)      | 1.78 (1.48 to 2.06) | 40 (24 to 55)      | 0.78 (0.47 to 1.08) | 5 (2 to 7)       | 0.08 (0.04 to 0.13) | 5 (2 to 9)      | 0.1 (0.04 to 0.19)  |
|                          | Male   | 84 (69 to 98)       | 3.8 (3.13 to 4.42)  | 38 (22 to 52)      | 1.69 (1.01 to 2.31) | 4 (2 to 7)       | 0.19 (0.09 to 0.31) | 5 (2 to 8)      | 0.21 (0.09 to 0.39) |
|                          | Female | 5 (4 to 7)          | 0.18 (0.13 to 0.23) | 2 (1 to 4)         | 0.08 (0.04 to 0.11) | 0 (0 to 0)       | 0.01 (0 to 0.01)    | 0 (0 to 1)      | 0.01 (0.01 to 0.02) |
| Uzbekistan               | Both   | 165 (129 to 204)    | 0.76 (0.61 to 0.93) | 46 (22 to 71)      | 0.18 (0.08 to 0.27) | 2 (1 to 4)       | 0.01 (0.01 to 0.02) | 15 (6 to 27)    | 0.05 (0.02 to 0.1)  |
|                          | Male   | 156 (123 to 193)    | 1.7 (1.35 to 2.08)  | 42 (22 to 65)      | 0.36 (0.18 to 0.55) | 2 (1 to 3)       | 0.02 (0.01 to 0.04) | 11 (4 to 19)    | 0.08 (0.03 to 0.15) |
|                          | Female | 9 (5 to 14)         | 0.06 (0.03 to 0.1)  | 4 (0 to 8)         | 0.03 (0 to 0.06)    | 1 (0 to 1)       | 0.01 (0 to 0.01)    | 4 (2 to 8)      | 0.03 (0.01 to 0.05) |
| Vanuatu                  | Both   | 1 (1 to 1)          | 0.49 (0.32 to 0.68) | 0 (0 to 0)         | 0.06 (0.02 to 0.13) | 0 (0 to 0)       | 0.04 (0.01 to 0.07) | 0 (0 to 0)      | 0.02 (0.01 to 0.04) |
|                          | Male   | 1 (0 to 1)          | 0.89 (0.58 to 1.23) | 0 (0 to 0)         | 0.12 (0.04 to 0.24) | 0 (0 to 0)       | 0.07 (0.02 to 0.13) | 0 (0 to 0)      | 0.03 (0.01 to 0.06) |
|                          | Female | 0 (0 to 0)          | 0.04 (0.02 to 0.07) | 0 (0 to 0)         | 0 (0 to 0)          | 0 (0 to 0)       | 0 (0 to 0.01)       | 0 (0 to 0)      | 0.01 (0 to 0.02)    |
| Venezuela                | Both   | 323 (221 to 444)    | 1.11 (0.76 to 1.52) | 127 (62 to 200)    | 0.42 (0.2 to 0.67)  | 6 (2 to 11)      | 0.02 (0.01 to 0.04) | 24 (9 to 47)    | 0.08 (0.03 to 0.15) |
|                          | Male   | 301 (204 to 412)    | 2.24 (1.55 to 3.04) | 122 (60 to 192)    | 0.87 (0.42 to 1.36) | 5 (2 to 10)      | 0.04 (0.02 to 0.08) | 22 (9 to 43)    | 0.15 (0.06 to 0.29) |
|                          | Female | 22 (13 to 35)       | 0.14 (0.09 to 0.22) | 5 (2 to 9)         | 0.03 (0.01 to 0.06) | 1 (0 to 1)       | 0 (0 to 0.01)       | 2 (1 to 4)      | 0.01 (0 to 0.03)    |
| Vietnam                  | Both   | 1340 (1020 to 1730) | 1.4 (1.07 to 1.77)  | 595 (339 to 874)   | 0.61 (0.35 to 0.89) | 29 (12 to 54)    | 0.03 (0.01 to 0.06) | 81 (32 to 156)  | 0.08 (0.03 to 0.14) |
|                          | Male   | 1330 (1010 to 1710) | 3.28 (2.53 to 4.13) | 591 (337 to 867)   | 1.41 (0.81 to 2.05) | 28 (12 to 54)    | 0.09 (0.04 to 0.16) | 75 (30 to 144)  | 0.15 (0.06 to 0.29) |
|                          | Female | 16 (9 to 26)        | 0.03 (0.02 to 0.05) | 4 (1 to 8)         | 0.01 (0 to 0.02)    | 0 (0 to 1)       | 0 (0 to 0)          | 6 (2 to 12)     | 0.01 (0 to 0.02)    |
| Yemen                    | Both   | 235 (155 to 330)    | 1.82 (1.23 to 2.56) | 8 (3 to 15)        | 0.05 (0.02 to 0.1)  | 1 (0 to 4)       | 0.01 (0 to 0.04)    | 8 (3 to 17)     | 0.05 (0.02 to 0.11) |
|                          | Male   | 211 (136 to 304)    | 3.34 (2.2 to 4.76)  | 8 (3 to 14)        | 0.11 (0.04 to 0.2)  | 1 (0 to 4)       | 0.02 (0 to 0.08)    | 8 (3 to 17)     | 0.11 (0.04 to 0.22) |
|                          | Female | 24 (15 to 35)       | 0.35 (0.22 to 0.52) | 0 (0 to 1)         | 0 (0 to 0.01)       | 0 (0 to 0)       | 0 (0 to 0.01)       | 0 (0 to 1)      | 0 (0 to 0.01)       |

|          |        |                 |                     |               |                     |            |                     |            |                     |
|----------|--------|-----------------|---------------------|---------------|---------------------|------------|---------------------|------------|---------------------|
| Zambia   | Both   | 44 (27 to 65)   | 0.66 (0.42 to 0.95) | 21 (10 to 36) | 0.28 (0.13 to 0.48) | 2 (1 to 6) | 0.03 (0.01 to 0.11) | 5 (2 to 9) | 0.06 (0.02 to 0.12) |
|          | Male   | 41 (25 to 60)   | 1.25 (0.8 to 1.81)  | 19 (10 to 33) | 0.53 (0.25 to 0.89) | 1 (0 to 5) | 0.05 (0.01 to 0.22) | 4 (1 to 8) | 0.09 (0.04 to 0.19) |
|          | Female | 3 (2 to 5)      | 0.11 (0.07 to 0.18) | 2 (1 to 3)    | 0.05 (0.02 to 0.09) | 0 (0 to 1) | 0.01 (0 to 0.02)    | 1 (0 to 2) | 0.02 (0.01 to 0.04) |
| Zimbabwe | Both   | 101 (77 to 128) | 1.41 (1.09 to 1.77) | 28 (13 to 45) | 0.35 (0.15 to 0.58) | 2 (1 to 4) | 0.03 (0.02 to 0.06) | 4 (2 to 7) | 0.04 (0.02 to 0.09) |
|          | Male   | 94 (72 to 119)  | 3.12 (2.45 to 3.89) | 26 (12 to 43) | 0.77 (0.35 to 1.27) | 1 (1 to 3) | 0.06 (0.03 to 0.12) | 3 (1 to 6) | 0.08 (0.03 to 0.16) |
|          | Female | 7 (4 to 11)     | 0.21 (0.13 to 0.31) | 1 (0 to 3)    | 0.03 (0.01 to 0.06) | 1 (0 to 1) | 0.02 (0.01 to 0.04) | 1 (0 to 1) | 0.02 (0.01 to 0.03) |

Figure S1. Annualised rate of change in the age-standardised death rate of larynx cancer attributable to smoking, 2010–2019.

Figure S1. Annualised rate of change in the age-standardised death rate of larynx cancer attributable to smoking, 2010–2019

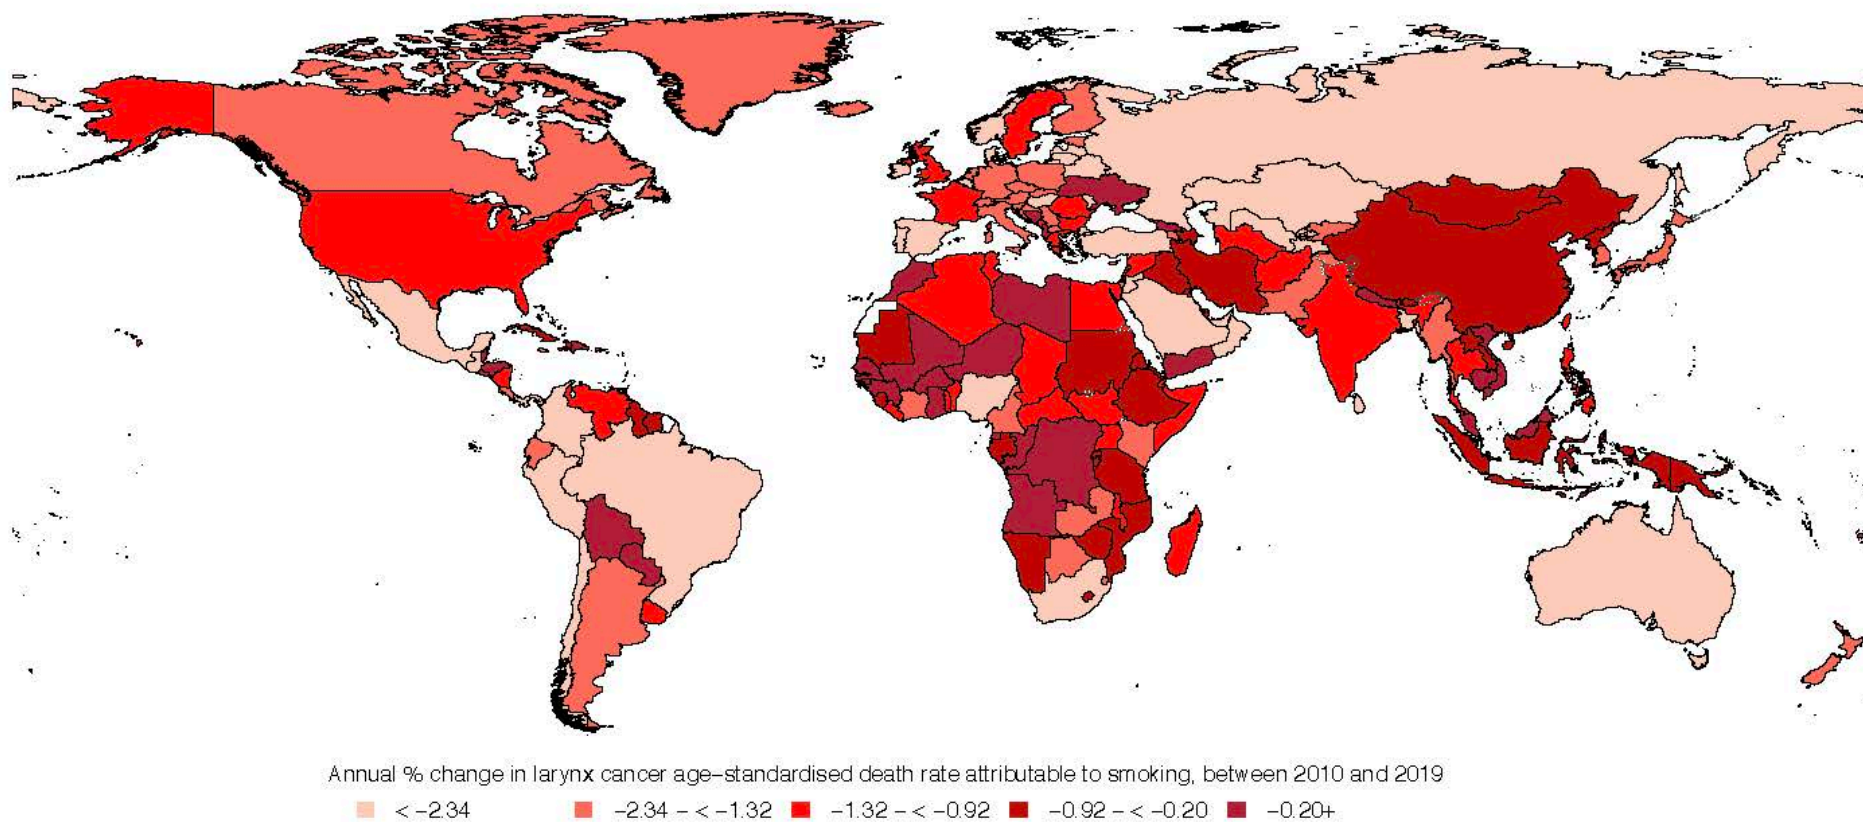

Supplement: mmc2 [file mmc2.pdf]
